# Supplementary material for: Dietary restriction and clock delay eye aging to extend lifespan in D. melanogaster
Source: Research Square preprint supplement (doi:10.21203/rs.3.rs-428198/v1), 2021-05-21
Supplement: Supplementary file 1 [file 3a55686f1281a70037731cb4.xlsx]

## Sheet: 11a
11a. Experimental materials.
Item	Vendor	Manufacturer	Catalog Number
LED strip lights	Amazon	Ustellar	UT33301-DW-NF
LED strip light (RGB)	Amazon	SUPERNIGHT	3528 RGB
4k camera	GoPro	GoPro	Hero 5, Black
Yeast Extract, BD Bacto	VWR	Thermo Scientific 212720	90000-722
C&H Granulated Sugar	Costco	-	814602
Drosophila Agar, Type II	Genesee Scientific	Genesee Scientific	66-104
Yellow cornmeal	Genesee Scientific	Genesee Scientific	62-101
All trans-retinal, powder, >98%	Sigma-Aldrich	Sigma-Aldrich	R2500-1G
Real Time-PCR primer sequences	Forward 5' to 3'	Reverse 5' to 3'	Manufacturer
AttA (Attacin A)	CAC AAT GTG GTG GGT CAG G	GGC ACC ATG ACC AGC ATT	IDT
DiptB (Diptericin B)	AGC CTG AAC CAC TGG CAT A	AGA TCG AAT CCT TGC TTT GG	IDT
Dro (Drosocin)	CCA TCG AGG ATC ACC TGA CT	CTT TAG GCG GGC AGA ATG	IDT
Software and algorithms	Reference
JTK_CYCLE algorithm v3.0	(Hughes et al., 2010)
NimbleScan2	NimbleGen
Bcl2fastq2	Illumina
Trimmomatic-0.36	(Bolger et al. 2014)
HISAT2	(Kim et al., 2015)
featureCounts	(Liao et al., 2014)
DEseq2	(Love et al., 2014)
makeUCSCfile	HOMER
Heatmap2	R gplots
findGO.pl	HOMER
LabChart6 and Labchart8 (ERG calculations)	AD Instruments
Critical commercial assays	Manufacturer	Catalog Number
Quick-RNA MiniPrep Kit	Zymo Research	Cat#11-328
iScript Reverse Transcription Supermix	Bio-Rad	Cat#1708841
SensiFast SYBR No-ROX Kit	Bioline	Cat#BIO-98020
RNeasey Lipid Tissue Mini Kit	Qiagen	Cat#74804
TransPlex Complete Whole Transcriptome Amplification Kit	Sigma-Aldrich	Cat#WTA2
QIAquick PCR Purification Kit	Qiagen	Cat#28104
One-Color DNA Labeling Kit	NimbleGen	Cat#05223555001
Hyper prep kit	Kapa Biosystems	Cat#KK8504
SMART-Seq v4 Ultra-low input RNA kit	Takara	Cat#634894
Illumina Quant qPCR Kits	Kapa Biosystems
