# Supplementary material for: Dietary restriction and clock delay eye aging to extend lifespan in D. melanogaster
Source: Research Square preprint supplement (doi:10.21203/rs.3.rs-428198/v1), 2021-05-21
Supplement: Supplementary file 2 [file 3ac477772c49c421a7e53f31.xlsx]

## Sheet: t.test,CantonS
Day	P value	Mean of AL CantonS	Mean of DR CantonS	Difference	SE of difference	t ratio	df	q value
2	5.1e-05	59.91	76.15	-16.24	3.636	4.466	46	5.2e-05
6	0.000235	56.57	75.45	-18.88	4.731	3.99	46	0.000119
10	0.000446	30.7	60.36	-29.66	7.523	3.943	30	0.00015
14	0.003727	50	65.34	-15.34	5.021	3.056	46	0.000941
18	0.010678	63.9	74.29	-10.39	3.903	2.662	46	0.002157

## Sheet: ANOVA,CantonS
Table Analyzed	CantonS Phototaxis
Comparison	AL vs DR
Mixed-effects model (REML)	Matching: Stacked
Assume sphericity?	Yes
Alpha	0.05
Fixed effects (type III)	P value	P value summary	Statistically significant (P < 0.05)?	F (DFn, DFd)
Time	<0.0001	****	Yes	F (4, 168) = 21.22
Diet	<0.0001	****	Yes	F (1, 46) = 32.04
Time x Diet	0.0426	*	Yes	F (4, 168) = 2.527
Random effects	SD	Variance
Subject	9.108	82.95
Residual	13.19	173.9
Was the matching effective?
Chi-square, df	32.07, 1
P value	<0.0001
P value summary	****
Is there significant matching (P < 0.05)?	Yes
Difference between column means
Predicted mean of AL	52.1
Predicted mean of DR	70.14
Difference between predicted means	-18.03
SE of difference	3.186
95% CI of difference	-24.45 to -11.62

## Sheet: t.test,ClkOut
Day	P value	Mean of AL ClkOut	Mean of DR ClkOut	Difference	SE of difference	t ratio	df	q value
2	0.025718	44.95	56.99	-12.04	5.221	2.305	46	0.051951
6	0.476997	42.06	45.85	-3.788	5.283	0.717	46	0.385414
10	0.120792	26.69	34.11	-7.419	4.693	1.581	46	0.122
14	0.072753	8.784	15.38	-6.592	3.589	1.836	46	0.097973
18	0.000234	5.992	19.86	-13.87	3.474	3.992	46	0.000945

## Sheet: ANOVA,ClkOut
Table Analyzed	Clk-Out Phototaxis
Comparison	AL vs DR
Two-way RM ANOVA	Matching: Stacked
Assume sphericity?	No
Alpha	0.05
Source of Variation	% of total variation	P value	P value summary	Significant?	Geisser-Greenhouse's epsilon
Time	0.671	0.1459	ns	No
Diet	49.21	<0.0001	****	Yes	0.7826
Time x Diet	3.768	0.0174	*	Yes
Subject	28.47	<0.0001	****	Yes
ANOVA table	SS	DF	MS	F (DFn, DFd)	P value
Time	816.3	4	204.1	F (4, 184) = 1.726	P=0.1459
Diet	59865	4	14966	F (3.130, 144.0) = 126.6	P<0.0001
Time x Diet	4583	1	4583	F (1, 46) = 6.087	P=0.0174
Subject	34635	46	752.9	F (46, 184) = 6.370	P<0.0001
Residual	21749	184	118.2
Difference between column means
Mean of AL	25.7
Mean of DR	34.44
Difference between means	-8.74
SE of difference	3.542
95% CI of difference	-15.87 to -1.609

## Sheet: t.test, Elav-GS-GAL4>CLK-DN1
Day	P value	Mean of AL Cnt	Mean of DR Cnt	Difference	SE of difference	t ratio	df	q value
2	0.060506	77.15	83.59	-6.438	3.345	1.924	46	0.012222
6	<0.000001	67.49	87.38	-19.89	2.545	7.817	46	<0.000001
10	2.7e-05	62.81	80.47	-17.66	3.788	4.661	46	7e-06
14	<0.000001	56.78	79.57	-22.79	4.005	5.691	46	<0.000001
18	<0.000001	43.3	77.39	-34.08	5.26	6.48	46	<0.000001
Day	P value	Mean of AL CNT	Mean of AL CLKΔ1	Difference	SE of difference	t ratio	df	q value
2	0.45875	77.15	74.25	2.901	3.882	0.7472	46	0.185335
6	0.030421	67.49	59.25	8.244	3.691	2.233	46	0.015363
10	0.000153	62.81	42.8	20.01	4.848	4.127	46	0.000103
14	<0.000001	56.78	22.49	34.29	4.769	7.19	46	<0.000001
18	<0.000001	43.3	9.631	33.67	4.972	6.772	46	<0.000001
Day	P value	Mean of DR Cnt	Mean of DR CLKΔ1	Difference	SE of difference	t ratio	df	q value
2	0.721967	83.59	84.52	-0.9272	2.59	0.358	46	0.437512
6	0.029634	87.38	82.85	4.53	2.018	2.245	46	0.022448
10	0.016197	80.47	71.92	8.544	3.423	2.496	46	0.016359
14	8e-06	79.57	60.4	19.17	3.815	5.026	46	1.2e-05
18	<0.000001	77.39	41.45	35.94	5.43	6.619	46	<0.000001

## Sheet: ANOVA,Elav-GS-GAL4>CLK-DN1
Table Analyzed	Elav-GS>CLKΔ1 Phototaxis							Table Analyzed	Elav-GS>CLKDN1 Phototaxis
comparison:	AL cnt vs AL CLKΔ1							comparison	DR cnt vs DR CLKΔ1
Two-way RM ANOVA	Matching: Stacked							Two-way RM ANOVA	Matching: Stacked
Assume sphericity?	No							Assume sphericity?	No
Alpha	0.05							Alpha	0.05
Source of Variation	% of total variation	P value	P value summary	Significant?	Geisser-Greenhouse's epsilon			Source of Variation	% of total variation	P value	P value summary	Significant?	Geisser-Greenhouse's epsilon
Time x Genotype	6.152	6.76e-08	****	Yes				Time x Genotype	12.81	<0.0000000001	****	Yes
Time	44.8	<0.0000000001	****	Yes	0.8377			Time	27.37	<0.0000000001	****	Yes	0.7023
Genotype	14.71	<0.0000000001	****	Yes				Genotype	13.65	5e-10	****	Yes
Subject	8.169	0.154362	ns	No				Subject	10.13	0.289951	ns	No
ANOVA table	SS	DF	MS	F (DFn, DFd)	P value			ANOVA table	SS	DF	MS	F (DFn, DFd)	P value
Time x Genotype	9859	4	2465	F (4, 184) = 10.82	P=0.0000000676			Time x Genotype	10188	4	2547	F (4, 184) = 16.35	P<0.0000000001
Time	71785	4	17946	F (3.351, 154.1) = 78.76	P<0.0000000001			Time	21774	4	5443	F (2.809, 129.2) = 34.94	P<0.0000000001
Genotype	23578	1	23578	F (1, 46) = 82.86	P<0.0000000001			Genotype	10858	1	10858	F (1, 46) = 61.99	P=0.0000000005
Subject	13089	46	284.6	F (46, 184) = 1.249	P=0.1543619723			Subject	8057	46	175.2	F (46, 184) = 1.124	P=0.2899505375
Residual	41928	184	227.9					Residual	28667	184	155.8
Difference between column means								Difference between column means
Mean of AL CNT	61.51							Mean of DR Cnt	81.68
Mean of AL CLKΔ1	41.68							Mean of DR CLKΔ1	68.23
Difference between means	19.82							Difference between means	13.45
SE of difference	2.178							SE of difference	1.709
95% CI of difference	15.44 to 24.21							95% CI of difference	10.01 to 16.89

## Sheet: t.test,Elav-GS-GAL4>CLK-DN2
Day	P value	Mean of AL cnt	Mean of DR Cnt	Difference	SE of difference	t ratio	df	q value
2	0.697057	66.96	69.94	-2.982	7.612	0.3917	46	0.563222
6	0.028401	68.45	78.44	-9.995	4.417	2.263	46	0.05737
10	0.046491	69.03	79.17	-10.14	4.954	2.046	46	0.062607
14	0.063812	60.87	70.46	-9.582	5.045	1.899	46	0.06445
18	1.4e-05	46.63	66.53	-19.9	4.101	4.852	46	5.8e-05
Day	P value	Mean of AL cnt	Mean of AL CLKΔ2	Difference	SE of difference	t ratio	df	q value
2	0.56771	66.96	70.73	-3.765	6.542	0.5756	46	0.114677
6	0.00077	68.45	49.4	19.04	5.286	3.603	46	0.000194
10	0.000371	69.03	49.63	19.4	5.048	3.843	46	0.000125
14	0.000186	60.87	40.57	20.31	4.996	4.065	46	9.4e-05
18	4e-06	46.63	23.41	23.22	4.405	5.271	46	4e-06
Day	P value	Mean of DR cnt	Mean of DR CLKΔ2	Difference	SE of difference	t ratio	df	q value
2	0.816606	69.94	68.33	1.619	6.941	0.2332	46	0.494863
6	0.055091	78.44	69.71	8.732	4.436	1.968	46	0.055642
10	0.001268	79.17	65.98	13.18	3.839	3.434	46	0.00192
14	0.173079	70.46	64.87	5.589	4.039	1.384	46	0.131107
18	8e-06	66.53	47.15	19.39	3.843	5.044	46	2.3e-05

## Sheet: ANOVA,Elav-GS-GAL4>CLK-DN2
Table Analyzed	Elav-GS>CLKΔ2 Phototaxis						Table Analyzed	Elav-GS>CLKDN2 Phototaxis
comparison:	AL cnt vs AL CLKΔ2						comparison	DR cnt vs DR CLKΔ2
Two-way RM ANOVA	Matching: Stacked						Two-way RM ANOVA	Matching: Stacked
Assume sphericity?	No						Assume sphericity?	No
Alpha	0.05						Alpha	0.05
Source of Variation	% of total variation	P value	P value summary	Significant?	Geisser-Greenhouse's epsilon		Source of Variation	% of total variation	P value	P value summary	Significant?	Geisser-Greenhouse's epsilon
Time x Genotype	4.483	0.000306	***	Yes			Time x Genotype	2.855	0.023657	*	Yes
Time	23.92	<0.000001	****	Yes	0.8358		Time	11.1	3e-06	****	Yes	0.6773
Genotype	11.39	1.9e-05	****	Yes			Genotype	7.105	0.003094	**	Yes
Subject	23.05	1e-05	****	Yes			Subject	33.51	<0.000001	****	Yes
ANOVA table	SS	DF	MS	F (DFn, DFd)	P value		ANOVA table	SS	DF	MS	F (DFn, DFd)	P value
Time x Genotype	5778	4	1445	F (4, 184) = 5.551	P=0.000306		Time x Genotype	2269	4	567.3	F (4, 184) = 2.890	P=0.023657
Time	30831	4	7708	F (3.343, 153.8) = 29.62	P<0.000001		Time	8823	4	2206	F (2.709, 124.6) = 11.24	P=0.000003
Genotype	14679	1	14679	F (1, 46) = 22.72	P=0.000019		Genotype	5648	1	5648	F (1, 46) = 9.753	P=0.003094
Subject	29716	46	646	F (46, 184) = 2.482	P=0.000010		Subject	26639	46	579.1	F (46, 184) = 2.951	P<0.000001
Residual	47887	184	260.3				Residual	36114	184	196.3
Difference between column means							Difference between column means
Mean of AL Cnt	62.39						Mean of DR Cnt	72.91
Mean of AL CLKΔ2	46.75						Mean of DR CLKΔ2	63.21
Difference between means	15.64						Difference between means	9.702
SE of difference	3.281						SE of difference	3.107
95% CI of difference	9.037 to 22.25						95% CI of difference	3.449 to 15.96

## Sheet: t.test,GMR-GAL4>RNAi cnt
Day	P value	Mean of AL RNAi Cnt	Mean of DR RNAi Cnt	Difference	SE of difference	t ratio	df	q value
2	0.13475	83.07	86.21	-3.139	2.062	1.522	46	0.02722
6	0.000202	71.23	85.86	-14.62	3.62	4.039	46	6.8e-05
10	<0.000001	62.88	80.85	-17.96	2.951	6.089	46	<0.000001
14	0.001746	65.33	80.19	-14.86	4.471	3.324	46	0.000441
18	0.000175	61.65	81.63	-19.98	4.667	4.281	30	6.8e-05

## Sheet: ANOVA,GMR-GAL4>RNAi cnt
Table Analyzed	GMR-GAL4>RNAi cnt Phototaxis
Comparison	AL vs DR
Two-way ANOVA	Ordinary
Alpha	0.05
Source of Variation	% of total variation	P value	P value summary	Significant?
Interaction	3.885	0.0117	*	Yes
Time	11.91	<0.0001	****	Yes
Diet	22.23	<0.0001	****	Yes
ANOVA table	SS (Type III)	DF	MS	F (DFn, DFd)	P value
Interaction	1899	4	474.6	F (4, 214) = 3.314	P=0.0117
Time	5818	4	1455	F (4, 214) = 10.16	P<0.0001
Diet	10865	1	10865	F (1, 214) = 75.87	P<0.0001
Residual	30646	214	143.2
Difference between column means
Predicted (LS) mean of AL RNAi Cnt	68.83
Predicted (LS) mean of DR RNAi Cnt	82.95
Difference between predicted means	-14.11
SE of difference	1.62
95% CI of difference	-17.31 to -10.92
Data summary
Number of columns (Diet)	2
Number of rows (Time)	5
Number of values	224

[truncated: 12 more sheets: t.test,GMR-GAL4>retinin-RNAi, ANOVA,GMR-GAL4>retinin-RNAi, t.test,GMR-GAL4>sunglasses-RNAi, ANOVA,GMR-GAL4>sunglasses-RNAi, t.test,GMR-GAL4>nrv2-RNAi, ANOVA,GMR-GAL4>nrv2-RNAi, t.test,GMR-GAL4>nrv3-RNAi, ANOVA,GMR-GAL4>nrv3-RNAi, t.test, prCLK-DN1, ANOVA, prCLK-DN1, t.test, GMR-GAL4>arr1-RNAi, ANOVA, GMR-GAL4>arr1-RNAi]
