# Supplementary material for: Dietary restriction and clock delay eye aging to extend lifespan in D. melanogaster
Source: Research Square preprint supplement (doi:10.21203/rs.3.rs-428198/v1), 2021-05-21
Supplement: Supplementary file 3 [file 6f21b9c3993b7d9b49207ff8.xlsx]

## Sheet: 5a
5a. nCLK-DN1 hemolymph mass-spec, all identified proteins
BH1: Drosophila hemolymph --- notice ratio formed is control over replicate (control/clk-dn1)
all proteins shown sorted by best Q value ---
								control/clk-dn1	control/clk-dn1		control/clk-dn1
Valid	Comparison (group1/group2)	Condition Numerator	Condition Denominator	# of Ratios	Group	AVG Group Quantity Denominator	AVG Group Quantity Numerator	AVG Log2 Ratio	Absolute AVG Log2 Ratio	% Change	Ratio	Standard Deviation	Pvalue	Qvalue	Degrees Of Freedom	Standard Error	ProteinGroups	ProteinNames	ProteinDescriptions	Genes	UniProtIds	Organisms	Database	OrganismId	Protein Existence	Sequence Version	FASTAName	FASTAHeader	# Unique Total Peptides	# Unique Total EG.Id
TRUE	Contr / Rep	Contr	Rep	878	L0MPS3;Q9V496	798919	1.00541e+06	0.33166	0.33166	25.8461	1.25846	0	4.49858e-54	9.1771e-52	877	0.0261443	L0MPS3;Q9V496,Q9V496	L0MPS3_DROME;APLP_DROME,APLP_DROME	Retinoid-and fatty acid-binding glycoprotein, isoform B;Apolipophorins,Apolipophorins	Rfabg	L0MPS3;Q9V496,Q9V496	Drosophila melanogaster	tr;sp,sp		1	1;2,2	uniprot-drosophila_reviewed_unreviewed_0825_2016	>tr|L0MPS3|L0MPS3_DROME Retinoid-and fatty acid-binding glycoprotein, isoform B OS=Drosophila melanogaster GN=Rfabg PE=1 SV=1;>sp|Q9V496|APLP_DROME Apolipophorins OS=Drosophila melanogaster GN=Rfabg PE=1 SV=2,>sp|Q9V496|APLP_DROME Apolipophorins OS=Drosophila melanogaster GN=Rfabg PE=1 SV=2	99	172
TRUE	Contr / Rep	Contr	Rep	102	Q9VBR6	2952.2	32002.3	3.43831	3.43831	984.014	10.8401	0	1.11406e-47	1.13634e-45	101	0.124097	Q9VBR6	Q9VBR6_DROME	RE74917p	tobi	Q9VBR6	Drosophila melanogaster	tr		2	1	uniprot-drosophila_reviewed_unreviewed_0825_2016	>tr|Q9VBR6|Q9VBR6_DROME RE74917p OS=Drosophila melanogaster GN=tobi PE=2 SV=1	14	17
TRUE	Contr / Rep	Contr	Rep	84	Q9V521	11009.7	19582.2	0.830769	0.830769	77.8634	1.77863	0	7.58202e-34	5.15577e-32	83	0.0552031	Q9V521	PPO2_DROME	Phenoloxidase 2	PPO2	Q9V521	Drosophila melanogaster	sp		1	1	uniprot-drosophila_reviewed_unreviewed_0825_2016	>sp|Q9V521|PPO2_DROME Phenoloxidase 2 OS=Drosophila melanogaster GN=PPO2 PE=1 SV=1,>sp|Q9V521|PPO2_DROME Phenoloxidase 2 OS=Drosophila melanogaster GN=PPO2 PE=1 SV=1	13	14
TRUE	Contr / Rep	Contr	Rep	176	P02843;Q29QE3;X2JD55	339960	687307	1.01559	1.01559	102.173	2.02173	0	1.57862e-31	8.05096e-30	175	0.107099	P02843,P02843;Q29QE3;X2JD55	VIT1_DROME,VIT1_DROME;Q29QE3_DROME;X2JD55_DROME	Vitellogenin-1,Vitellogenin-1;GH19966p;Yolk protein 1, isoform B	Yp1	P02843,P02843;Q29QE3;X2JD55	Drosophila melanogaster	sp,sp;tr;tr		1,1;2;1	1	uniprot-drosophila_reviewed_unreviewed_0825_2016	>sp|P02843|VIT1_DROME Vitellogenin-1 OS=Drosophila melanogaster GN=Yp1 PE=1 SV=1,>sp|P02843|VIT1_DROME Vitellogenin-1 OS=Drosophila melanogaster GN=Yp1 PE=1 SV=1;>tr|Q29QE3|Q29QE3_DROME GH19966p OS=Drosophila melanogaster GN=Yp1 PE=2 SV=1;>tr|X2JD55|X2JD55_DROME Yolk protein 1, isoform B OS=Drosophila melanogaster GN=Yp1 PE=1 SV=1	19	49
TRUE	Contr / Rep	Contr	Rep	196	D3DMQ1;P06607;X2JEX8	470095	845260	0.846443	0.846443	79.8063	1.79806	0	2.7646e-27	1.12796e-25	195	0.0872155	D3DMQ1;P06607,P06607;X2JEX8	D3DMQ1_DROME;VIT3_DROME,VIT3_DROME;X2JEX8_DROME	FI02182p (Fragment);Vitellogenin-3,Vitellogenin-3;Yolk protein 3, isoform B	Yp3-RA;Yp3,Yp3;Yp3	D3DMQ1;P06607,P06607;X2JEX8	Drosophila melanogaster	tr;sp,sp;tr		2;1,1;1	1	uniprot-drosophila_reviewed_unreviewed_0825_2016	>tr|D3DMQ1|D3DMQ1_DROME FI02182p (Fragment) OS=Drosophila melanogaster GN=Yp3-RA PE=2 SV=1;>sp|P06607|VIT3_DROME Vitellogenin-3 OS=Drosophila melanogaster GN=Yp3 PE=1 SV=1,>sp|P06607|VIT3_DROME Vitellogenin-3 OS=Drosophila melanogaster GN=Yp3 PE=1 SV=1;>tr|X2JEX8|X2JEX8_DROME Yolk protein 3, isoform B OS=Drosophila melanogaster GN=Yp3 PE=1 SV=1	20	58
TRUE	Contr / Rep	Contr	Rep	145	P02844;X2JB25	390912	582627	0.575729	0.575729	49.043	1.49043	0	8.68517e-27	2.95296e-25	144	0.0819932	P02844,P02844;X2JB25	VIT2_DROME,VIT2_DROME;X2JB25_DROME	Vitellogenin-2,Vitellogenin-2;Yolk protein 2, isoform B	Yp2	P02844,P02844;X2JB25	Drosophila melanogaster	sp,sp;tr		1	2,2;1	uniprot-drosophila_reviewed_unreviewed_0825_2016	>sp|P02844|VIT2_DROME Vitellogenin-2 OS=Drosophila melanogaster GN=Yp2 PE=1 SV=2,>sp|P02844|VIT2_DROME Vitellogenin-2 OS=Drosophila melanogaster GN=Yp2 PE=1 SV=2;>tr|X2JB25|X2JB25_DROME Yolk protein 2, isoform B OS=Drosophila melanogaster GN=Yp2 PE=1 SV=1	16	28
TRUE	Contr / Rep	Contr	Rep	48	C7LAE6;C8VV38;C8VV56;M9PI96;Q86BI9;Q86BJ0;Q9VVV5;Q9VVV6	7784.86	19243.5	1.30563	1.30563	147.191	2.47191	0	6.07347e-24	1.76998e-22	47	0.0657211	C7LAE6;C8VV38;C8VV56;M9PI96;Q86BI9;Q86BJ0;Q9VVV5;Q9VVV6	C7LAE6_DROME;C8VV38_DROME;C8VV56_DROME;M9PI96_DROME;Q86BI9_DROME;Q86BJ0_DROME;Q9VVV5_DROME;Q9VVV6_DROME	GH06592p (Fragment);AT10688p;AT14236p;Uncharacterized protein, isoform E;Uncharacterized protein, isoform D;Uncharacterized protein, isoform C;Uncharacterized protein, isoform A;LD45843p	CG18135-RA;CG18135-RC;CG18135-RD;CG18135;CG18135;CG18135;CG18135;CG18135	C7LAE6;C8VV38;C8VV56;M9PI96;Q86BI9;Q86BJ0;Q9VVV5;Q9VVV6	Drosophila melanogaster	tr		2;2;2;1;1;1;1;1	1;1;1;1;1;1;2;2	uniprot-drosophila_reviewed_unreviewed_0825_2016	>tr|C7LAE6|C7LAE6_DROME GH06592p (Fragment) OS=Drosophila melanogaster GN=CG18135-RA PE=2 SV=1;>tr|C8VV38|C8VV38_DROME AT10688p OS=Drosophila melanogaster GN=CG18135-RC PE=2 SV=1;>tr|C8VV56|C8VV56_DROME AT14236p OS=Drosophila melanogaster GN=CG18135-RD PE=2 SV=1;>tr|M9PI96|M9PI96_DROME Uncharacterized protein, isoform E OS=Drosophila melanogaster GN=CG18135 PE=1 SV=1;>tr|Q86BI9|Q86BI9_DROME Uncha…	9	9
TRUE	Contr / Rep	Contr	Rep	156	Q24388;X2JCV2	63592.9	131178	1.04459	1.04459	106.278	2.06278	0	2.62825e-23	6.70203e-22	155	0.124742	Q24388,Q24388;X2JCV2	LSP2_DROME,LSP2_DROME;X2JCV2_DROME	Larval serum protein 2,Larval serum protein 2;Larval serum protein 2, isoform B	Lsp2	Q24388,Q24388;X2JCV2	Drosophila melanogaster	sp,sp;tr		2,2;4	2,2;1	uniprot-drosophila_reviewed_unreviewed_0825_2016	>sp|Q24388|LSP2_DROME Larval serum protein 2 OS=Drosophila melanogaster GN=Lsp2 PE=2 SV=2,>sp|Q24388|LSP2_DROME Larval serum protein 2 OS=Drosophila melanogaster GN=Lsp2 PE=2 SV=2;>tr|X2JCV2|X2JCV2_DROME Larval serum protein 2, isoform B OS=Drosophila melanogaster GN=Lsp2 PE=4 SV=1	18	26
TRUE	Contr / Rep	Contr	Rep	36	A0A0B4K6I6;A9UNE9;Q9VB96	927.785	2907.01	1.64767	1.64767	213.328	3.13328	0	5.41237e-21	1.2268e-19	35	0.0867762	A0A0B4K6I6;A9UNE9;Q9VB96	A0A0B4K6I6_DROME;A9UNE9_DROME;Q9VB96_DROME	Uncharacterized protein, isoform B;GH20910p (Fragment);Uncharacterized protein, isoform A	CG31075;;CG31075	A0A0B4K6I6;A9UNE9;Q9VB96	Drosophila melanogaster	tr		1;2;1	1;1;2	uniprot-drosophila_reviewed_unreviewed_0825_2016	>tr|A0A0B4K6I6|A0A0B4K6I6_DROME Uncharacterized protein, isoform B OS=Drosophila melanogaster GN=CG31075 PE=1 SV=1;>tr|A9UNE9|A9UNE9_DROME GH20910p (Fragment) OS=Drosophila melanogaster PE=2 SV=1;>tr|Q9VB96|Q9VB96_DROME Uncharacterized protein, isoform A OS=Drosophila melanogaster GN=CG31075 PE=1 SV=2	6	6
TRUE	Contr / Rep	Contr	Rep	24	A0A0S0WH10;Q9VU58;X2JB24	13074.6	34679.1	1.4073	1.4073	165.241	2.65241	0	3.12253e-19	6.36995e-18	23	0.0514712	A0A0S0WH10;Q9VU58,Q9VU58;X2JB24	A0A0S0WH10_DROME;NPLP2_DROME,NPLP2_DROME;X2JB24_DROME	Neuropeptide-like 2, isoform C;Neuropeptide-like 2,Neuropeptide-like 2;Neuropeptide-like 2, isoform B	Nplp2	A0A0S0WH10;Q9VU58,Q9VU58;X2JB24	Drosophila melanogaster	tr;sp,sp;tr		4;1,1;4	1	uniprot-drosophila_reviewed_unreviewed_0825_2016	>tr|A0A0S0WH10|A0A0S0WH10_DROME Neuropeptide-like 2, isoform C OS=Drosophila melanogaster GN=Nplp2 PE=4 SV=1;>sp|Q9VU58|NPLP2_DROME Neuropeptide-like 2 OS=Drosophila melanogaster GN=Nplp2 PE=1 SV=1,>sp|Q9VU58|NPLP2_DROME Neuropeptide-like 2 OS=Drosophila melanogaster GN=Nplp2 PE=1 SV=1;>tr|X2JB24|X2JB24_DROME Neuropeptide-like 2, isoform B OS=Drosophila melanogaster GN=Nplp2 PE=4 SV=1	3	6
TRUE	Contr / Rep	Contr	Rep	114	P13060	53949.3	39394.1	-0.453625	0.453625	-26.9794	0.730206	0	5.16915e-18	9.58643e-17	113	0.0698284	P13060	EF2_DROME	Elongation factor 2	EF2	P13060	Drosophila melanogaster	sp		1	4	uniprot-drosophila_reviewed_unreviewed_0825_2016	>sp|P13060|EF2_DROME Elongation factor 2 OS=Drosophila melanogaster GN=EF2 PE=1 SV=4,>sp|P13060|EF2_DROME Elongation factor 2 OS=Drosophila melanogaster GN=EF2 PE=1 SV=4	19	19
TRUE	Contr / Rep	Contr	Rep	410	B7Z001;Q9VQL7	163317	178956	0.131934	0.131934	9.57619	1.09576	0	5.89657e-17	1.00242e-15	409	0.0570393	B7Z001;Q9VQL7	B7Z001_DROME;Q9VQL7_DROME	Fatty acid synthase 1, isoform C;Fatty acid synthase 1, isoform A	FASN1	B7Z001;Q9VQL7	Drosophila melanogaster	tr		1	2;1	uniprot-drosophila_reviewed_unreviewed_0825_2016	>tr|B7Z001|B7Z001_DROME Fatty acid synthase 1, isoform C OS=Drosophila melanogaster GN=FASN1 PE=1 SV=2;>tr|Q9VQL7|Q9VQL7_DROME Fatty acid synthase 1, isoform A OS=Drosophila melanogaster GN=FASN1 PE=1 SV=1	54	72
TRUE	Contr / Rep	Contr	Rep	36	Q9W3N9	1745.96	2814.87	0.689046	0.689046	61.2217	1.61222	0	3.27775e-15	5.14354e-14	35	0.0692615	Q9W3N9	Q9W3N9_DROME	LD24105p	CG10932	Q9W3N9	Drosophila melanogaster	tr		1	1	uniprot-drosophila_reviewed_unreviewed_0825_2016	>tr|Q9W3N9|Q9W3N9_DROME LD24105p OS=Drosophila melanogaster GN=CG10932 PE=1 SV=1	6	6
TRUE	Contr / Rep	Contr	Rep	48	P06603;P06605	35615	23125.5	-0.623001	0.623001	-35.0681	0.649319	0	2.82518e-14	4.11669e-13	47	0.054078	P06603,P06603;P06605,P06605	TBA1_DROME,TBA1_DROME;TBA3_DROME,TBA3_DROME	Tubulin alpha-1 chain,Tubulin alpha-1 chain;Tubulin alpha-3 chain,Tubulin alpha-3 chain	alphaTub84B,alphaTub84B;alphaTub84D,alphaTub84D	P06603,P06603;P06605,P06605	Drosophila melanogaster	sp		1,1;2,2	1	uniprot-drosophila_reviewed_unreviewed_0825_2016	>sp|P06603|TBA1_DROME Tubulin alpha-1 chain OS=Drosophila melanogaster GN=alphaTub84B PE=1 SV=1,>sp|P06603|TBA1_DROME Tubulin alpha-1 chain OS=Drosophila melanogaster GN=alphaTub84B PE=1 SV=1;>sp|P06605|TBA3_DROME Tubulin alpha-3 chain OS=Drosophila melanogaster GN=alphaTub84D PE=2 SV=1,>sp|P06605|TBA3_DROME Tubulin alpha-3 chain OS=Drosophila melanogaster GN=alphaTub84D PE=2 SV=1	7	8
TRUE	Contr / Rep	Contr	Rep	60	A0A0B4K623;E8NH74;O96553	4205.75	8700.88	1.0488	1.0488	106.881	2.06881	0	8.71675e-14	1.18548e-12	59	0.131311	A0A0B4K623;E8NH74;O96553,O96553	A0A0B4K623_DROME;E8NH74_DROME;C1TC_DROME,C1TC_DROME	Pugilist, isoform E;LD23514p;C-1-tetrahydrofolate synthase, cytoplasmic,C-1-tetrahydrofolate synthase, cytoplasmic	pug;pug-RD;pug,pug	A0A0B4K623;E8NH74;O96553,O96553	Drosophila melanogaster	tr;tr;sp,sp		1;2;2,2	1;1;4,4	uniprot-drosophila_reviewed_unreviewed_0825_2016	>tr|A0A0B4K623|A0A0B4K623_DROME Pugilist, isoform E OS=Drosophila melanogaster GN=pug PE=1 SV=1;>tr|E8NH74|E8NH74_DROME LD23514p OS=Drosophila melanogaster GN=pug-RD PE=2 SV=1;>sp|O96553|C1TC_DROME C-1-tetrahydrofolate synthase, cytoplasmic OS=Drosophila melanogaster GN=pug PE=2 SV=4,>sp|O96553|C1TC_DROME C-1-tetrahydrofolate synthase, cytoplasmic OS=Drosophila melanogaster GN=pug PE=2 SV=4	10	11
TRUE	Contr / Rep	Contr	Rep	138	P11996;X2J8F5	42060.3	50553.1	0.265341	0.265341	20.192	1.20192	0	1.0317e-13	1.31542e-12	137	0.0718647	P11996,P11996;X2J8F5	LSP1B_DROME,LSP1B_DROME;X2J8F5_DROME	Larval serum protein 1 beta chain,Larval serum protein 1 beta chain;Larval serum protein 1 beta, isoform B	Lsp1beta	P11996,P11996;X2J8F5	Drosophila melanogaster	sp,sp;tr		2,2;4	3,3;1	uniprot-drosophila_reviewed_unreviewed_0825_2016	>sp|P11996|LSP1B_DROME Larval serum protein 1 beta chain OS=Drosophila melanogaster GN=Lsp1beta PE=2 SV=3,>sp|P11996|LSP1B_DROME Larval serum protein 1 beta chain OS=Drosophila melanogaster GN=Lsp1beta PE=2 SV=3;>tr|X2J8F5|X2J8F5_DROME Larval serum protein 1 beta, isoform B OS=Drosophila melanogaster GN=Lsp1beta PE=4 SV=1	20	24
TRUE	Contr / Rep	Contr	Rep	36	O97479;Q960H1	2980.41	8435.17	1.50091	1.50091	183.02	2.8302	0	1.55268e-13	1.86322e-12	35	0.15249	O97479;Q960H1	O97479_DROME;Q960H1_DROME	FI05212p;LP12301p	Sodh-1	O97479;Q960H1	Drosophila melanogaster	tr		1;2	1	uniprot-drosophila_reviewed_unreviewed_0825_2016	>tr|O97479|O97479_DROME FI05212p OS=Drosophila melanogaster GN=Sodh-1 PE=1 SV=1;>tr|Q960H1|Q960H1_DROME LP12301p OS=Drosophila melanogaster GN=Sodh-1 PE=2 SV=1	5	6
TRUE	Contr / Rep	Contr	Rep	42	M9PCC1;O18640	5260.55	2771.85	-0.924365	0.924365	-47.3087	0.526913	0	2.09484e-13	2.37415e-12	41	0.109026	M9PCC1;O18640,O18640	M9PCC1_DROME;GBLP_DROME,GBLP_DROME	Receptor of activated protein kinase C 1, isoform C;Guanine nucleotide-binding protein subunit beta-like protein,Guanine nucleotide-binding protein subunit beta-like protein	Rack1	M9PCC1;O18640,O18640	Drosophila melanogaster	tr;sp,sp		4;1,1	1;2,2	uniprot-drosophila_reviewed_unreviewed_0825_2016	>tr|M9PCC1|M9PCC1_DROME Receptor of activated protein kinase C 1, isoform C OS=Drosophila melanogaster GN=Rack1 PE=4 SV=1;>sp|O18640|GBLP_DROME Guanine nucleotide-binding protein subunit beta-like protein OS=Drosophila melanogaster GN=Rack1 PE=1 SV=2,>sp|O18640|GBLP_DROME Guanine nucleotide-binding protein subunit beta-like protein OS=Drosophila melanogaster GN=Rack1 PE=1 SV=2	7	7
TRUE	Contr / Rep	Contr	Rep	128	M9PBL3;P02828	32955.4	23453	-0.490746	0.490746	-28.8343	0.711657	0	1.03053e-12	1.10646e-11	127	0.0765288	M9PBL3;P02828,P02828	M9PBL3_DROME;HSP83_DROME,HSP83_DROME	Heat shock protein 83, isoform B;Heat shock protein 83,Heat shock protein 83	Hsp83	M9PBL3;P02828,P02828	Drosophila melanogaster	tr;sp,sp		3;1,1	1	uniprot-drosophila_reviewed_unreviewed_0825_2016	>tr|M9PBL3|M9PBL3_DROME Heat shock protein 83, isoform B OS=Drosophila melanogaster GN=Hsp83 PE=3 SV=1;>sp|P02828|HSP83_DROME Heat shock protein 83 OS=Drosophila melanogaster GN=Hsp83 PE=1 SV=1,>sp|P02828|HSP83_DROME Heat shock protein 83 OS=Drosophila melanogaster GN=Hsp83 PE=1 SV=1	17	23
TRUE	Contr / Rep	Contr	Rep	36	Q7JYW9;Q9GNE3;Q9GNE4;Q9GNF4;Q9GTU5	1219.54	3146.53	1.36742	1.36742	158.009	2.58009	0	1.4181e-12	1.44646e-11	35	0.126996	Q7JYW9;Q9GNE3;Q9GNE4;Q9GNF4;Q9GTU5	Q7JYW9_DROME;Q9GNE3_DROME;Q9GNE4_DROME;Q9GNF4_DROME;Q9GTU5_DROME	Phosphotransferase	Hex-C	Q7JYW9;Q9GNE3;Q9GNE4;Q9GNF4;Q9GTU5	Drosophila melanogaster	tr		1;3;3;3;3	1	uniprot-drosophila_reviewed_unreviewed_0825_2016	>tr|Q7JYW9|Q7JYW9_DROME Phosphotransferase OS=Drosophila melanogaster GN=Hex-C PE=1 SV=1;>tr|Q9GNE3|Q9GNE3_DROME Phosphotransferase OS=Drosophila melanogaster GN=Hex-C PE=3 SV=1;>tr|Q9GNE4|Q9GNE4_DROME Phosphotransferase OS=Drosophila melanogaster GN=Hex-C PE=3 SV=1;>tr|Q9GNF4|Q9GNF4_DROME Phosphotransferase OS=Drosophila melanogaster GN=Hex-C PE=3 SV=1;>tr|Q9GTU5|Q9GTU5_DROME Phosphotransferase …	5	6
TRUE	Contr / Rep	Contr	Rep	73	C6TP87;P08736	181626	126202	-0.525239	0.525239	-30.5156	0.694844	0	4.99252e-12	4.75587e-11	72	0.0701792	C6TP87;P08736,P08736	C6TP87_DROME;EF1A1_DROME,EF1A1_DROME	Elongation factor 1-alpha;Elongation factor 1-alpha 1,Elongation factor 1-alpha 1	Ef1alpha48D	C6TP87;P08736,P08736	Drosophila melanogaster	tr;sp,sp		1	1;2,2	uniprot-drosophila_reviewed_unreviewed_0825_2016	>tr|C6TP87|C6TP87_DROME Elongation factor 1-alpha OS=Drosophila melanogaster GN=Ef1alpha48D PE=1 SV=1;>sp|P08736|EF1A1_DROME Elongation factor 1-alpha 1 OS=Drosophila melanogaster GN=Ef1alpha48D PE=1 SV=2,>sp|P08736|EF1A1_DROME Elongation factor 1-alpha 1 OS=Drosophila melanogaster GN=Ef1alpha48D PE=1 SV=2	9	13
TRUE	Contr / Rep	Contr	Rep	30	Q95U34	644.906	1321.39	1.0349	1.0349	104.897	2.04897	0	5.12888e-12	4.75587e-11	29	0.0993271	Q95U34	Q95U34_DROME	GH11113p	Galk	Q95U34	Drosophila melanogaster	tr		1	1	uniprot-drosophila_reviewed_unreviewed_0825_2016	>tr|Q95U34|Q95U34_DROME GH11113p OS=Drosophila melanogaster GN=Galk PE=1 SV=1	5	6
TRUE	Contr / Rep	Contr	Rep	36	Q5BII6;Q9U1L2	4734.39	11945.5	1.33521	1.33521	152.312	2.52312	0	8.12189e-12	7.20376e-11	35	0.197801	Q5BII6;Q9U1L2	Q5BII6_DROME;Q9U1L2_DROME	RH05486p (Fragment);CG3699	CG3699;EG:BACR7A4.14	Q5BII6;Q9U1L2	Drosophila melanogaster	tr		2;1	1	uniprot-drosophila_reviewed_unreviewed_0825_2016	>tr|Q5BII6|Q5BII6_DROME RH05486p (Fragment) OS=Drosophila melanogaster GN=CG3699 PE=2 SV=1;>tr|Q9U1L2|Q9U1L2_DROME CG3699 OS=Drosophila melanogaster GN=EG:BACR7A4.14 PE=1 SV=1	6	6
TRUE	Contr / Rep	Contr	Rep	24	Q9VEJ3	271.507	848.014	1.6431	1.6431	212.336	3.12336	0	1.19558e-11	9.92799e-11	23	0.130815	Q9VEJ3	Q9VEJ3_DROME	Pyrroline-5-carboxylate reductase	P5cr-2	Q9VEJ3	Drosophila melanogaster	tr		1	1	uniprot-drosophila_reviewed_unreviewed_0825_2016	>tr|Q9VEJ3|Q9VEJ3_DROME Pyrroline-5-carboxylate reductase OS=Drosophila melanogaster GN=P5cr-2 PE=1 SV=1	3	4
TRUE	Contr / Rep	Contr	Rep	30	P62085;Q8IMI7;Q9VA91	4497.34	2780.95	-0.693494	0.693494	-38.1646	0.618354	0	1.21667e-11	9.92799e-11	29	0.0657379	P62085;Q8IMI7;Q9VA91,Q9VA91	RS7_DROYA;Q8IMI7_DROME;RS7_DROME,RS7_DROME	40S ribosomal protein S7;Ribosomal protein S7, isoform E;40S ribosomal protein S7,40S ribosomal protein S7	RpS7	P62085;Q8IMI7;Q9VA91,Q9VA91	Drosophila yakuba;Drosophila melanogaster;Drosophila melanogaster,Drosophila melanogaster	sp;tr;sp,sp		2;1;1,1	1;2;1,1	uniprot-drosophila_reviewed_unreviewed_0825_2016	>sp|P62085|RS7_DROYA 40S ribosomal protein S7 OS=Drosophila yakuba GN=RpS7 PE=2 SV=1;>tr|Q8IMI7|Q8IMI7_DROME Ribosomal protein S7, isoform E OS=Drosophila melanogaster GN=RpS7 PE=1 SV=2;>sp|Q9VA91|RS7_DROME 40S ribosomal protein S7 OS=Drosophila melanogaster GN=RpS7 PE=1 SV=1,>sp|Q9VA91|RS7_DROME 40S ribosomal protein S7 OS=Drosophila melanogaster GN=RpS7 PE=1 SV=1	5	5
TRUE	Contr / Rep	Contr	Rep	24	Q9VWP2	2443.1	3907.41	0.6775	0.6775	59.9365	1.59937	0	2.13147e-11	1.67238e-10	23	0.085209	Q9VWP2	Q9VWP2_DROME	CG7322, isoform A	CG7322	Q9VWP2	Drosophila melanogaster	tr		1	1	uniprot-drosophila_reviewed_unreviewed_0825_2016	>tr|Q9VWP2|Q9VWP2_DROME CG7322, isoform A OS=Drosophila melanogaster GN=CG7322 PE=1 SV=1	4	4
TRUE	Contr / Rep	Contr	Rep	30	D0Z741;Q5U189;Q9VLG9	1682.14	4435.41	1.39877	1.39877	163.676	2.63676	0	2.39927e-11	1.81278e-10	29	0.109987	D0Z741;Q5U189;Q9VLG9	D0Z741_DROME;Q5U189_DROME;Q9VLG9_DROME	FI12865p (Fragment);RE37426p (Fragment);CG9510, isoform B	CG9515-RA;CG33085;CG9510	D0Z741;Q5U189;Q9VLG9	Drosophila melanogaster	tr		2;2;1	1;1;3	uniprot-drosophila_reviewed_unreviewed_0825_2016	>tr|D0Z741|D0Z741_DROME FI12865p (Fragment) OS=Drosophila melanogaster GN=CG9515-RA PE=2 SV=1;>tr|Q5U189|Q5U189_DROME RE37426p (Fragment) OS=Drosophila melanogaster GN=CG33085 PE=2 SV=1;>tr|Q9VLG9|Q9VLG9_DROME CG9510, isoform B OS=Drosophila melanogaster GN=CG9510 PE=1 SV=3	5	5
TRUE	Contr / Rep	Contr	Rep	42	D1FYH5;D1FYI8;Q9VAJ4	19317.5	34631.9	0.842191	0.842191	79.2771	1.79277	0	2.60093e-11	1.89496e-10	41	0.112526	D1FYH5;D1FYI8;Q9VAJ4,Q9VAJ4	D1FYH5_DROME;D1FYI8_DROME;OB99A_DROME,OB99A_DROME	Odorant-binding protein 99a;Odorant-binding protein 99a;General odorant-binding protein 99a,General odorant-binding protein 99a	Obp99a	D1FYH5;D1FYI8;Q9VAJ4,Q9VAJ4	Drosophila melanogaster	tr;tr;sp,sp		4;4;2,2	1;1;2,2	uniprot-drosophila_reviewed_unreviewed_0825_2016	>tr|D1FYH5|D1FYH5_DROME Odorant-binding protein 99a OS=Drosophila melanogaster GN=Obp99a PE=4 SV=1;>tr|D1FYI8|D1FYI8_DROME Odorant-binding protein 99a OS=Drosophila melanogaster GN=Obp99a PE=4 SV=1;>sp|Q9VAJ4|OB99A_DROME General odorant-binding protein 99a OS=Drosophila melanogaster GN=Obp99a PE=2 SV=2,>sp|Q9VAJ4|OB99A_DROME General odorant-binding protein 99a OS=Drosophila melanogaster GN=Obp99a…	5	7
TRUE	Contr / Rep	Contr	Rep	12	D1FYT3;D1FYT5;D1FYU3;D1FYW7;Q9VAI6	117.719	2067.15	4.13423	4.13423	1656.01	17.5601	0	2.90809e-11	2.04569e-10	11	0.195665	D1FYT3;D1FYT5;D1FYU3;D1FYW7;Q9VAI6,Q9VAI6	D1FYT3_DROME;D1FYT5_DROME;D1FYU3_DROME;D1FYW7_DROME;OB99B_DROME,OB99B_DROME	Odorant-binding protein 99b;Odorant-binding protein 99b;Odorant-binding protein 99b;Odorant-binding protein 99b;General odorant-binding protein 99b,General odorant-binding protein 99b	Obp99b	D1FYT3;D1FYT5;D1FYU3;D1FYW7;Q9VAI6,Q9VAI6	Drosophila melanogaster	tr;tr;tr;tr;sp,sp		1;4;4;4;2,2	1	uniprot-drosophila_reviewed_unreviewed_0825_2016	>tr|D1FYT3|D1FYT3_DROME Odorant-binding protein 99b OS=Drosophila melanogaster GN=Obp99b PE=1 SV=1;>tr|D1FYT5|D1FYT5_DROME Odorant-binding protein 99b OS=Drosophila melanogaster GN=Obp99b PE=4 SV=1;>tr|D1FYU3|D1FYU3_DROME Odorant-binding protein 99b OS=Drosophila melanogaster GN=Obp99b PE=4 SV=1;>tr|D1FYW7|D1FYW7_DROME Odorant-binding protein 99b OS=Drosophila melanogaster GN=Obp99b PE=4 SV=1;>sp…	1	2
TRUE	Contr / Rep	Contr	Rep	36	Q86PE8;Q9VL01	1577.48	2732.7	0.792711	0.792711	73.2327	1.73233	0	5.80579e-11	3.94793e-10	35	0.11355	Q86PE8;Q9VL01	Q86PE8_DROME;Q9VL01_DROME	SD23103p;CG5390, isoform A	CG5390;CG5390-RA	Q86PE8;Q9VL01	Drosophila melanogaster	tr		2;1	1	uniprot-drosophila_reviewed_unreviewed_0825_2016	>tr|Q86PE8|Q86PE8_DROME SD23103p OS=Drosophila melanogaster GN=CG5390 PE=2 SV=1;>tr|Q9VL01|Q9VL01_DROME CG5390, isoform A OS=Drosophila melanogaster GN=CG5390-RA PE=1 SV=1	5	6
TRUE	Contr / Rep	Contr	Rep	129	A9UNH0;O97355;Q9VWV6	87486.6	140981	0.688371	0.688371	61.1463	1.61146	0	6.66054e-11	4.38307e-10	128	0.120181	A9UNH0;O97355;Q9VWV6	A9UNH0_DROME;O97355_DROME;Q9VWV6_DROME	LP08340p (Fragment);Transferrin;Transferrin 1, isoform A	;Tsf1;Tsf1	A9UNH0;O97355;Q9VWV6	Drosophila melanogaster	tr		2;2;1	1	uniprot-drosophila_reviewed_unreviewed_0825_2016	>tr|A9UNH0|A9UNH0_DROME LP08340p (Fragment) OS=Drosophila melanogaster PE=2 SV=1;>tr|O97355|O97355_DROME Transferrin OS=Drosophila melanogaster GN=Tsf1 PE=2 SV=1;>tr|Q9VWV6|Q9VWV6_DROME Transferrin 1, isoform A OS=Drosophila melanogaster GN=Tsf1 PE=1 SV=1	14	27
TRUE	Contr / Rep	Contr	Rep	18	D9HRV1;D9HRV3;D9HRV4;D9HRV5;D9HRV8;D9HRW2;D9HRW5;D9HRW7;D9HRW9;D9HRX4;D9HRY4;D9HRZ7;D9HRZ9;D9HS27;H8F4T3;Q9NDS6;Q9VFG5	3518.03	6548.96	0.896498	0.896498	86.1541	1.86154	0	3.05e-10	1.94438e-09	17	0.0822068	D9HRV1;D9HRV3;D9HRV4;D9HRV5;D9HRV8;D9HRW2;D9HRW5;D9HRW7;D9HRW9;D9HRX4;D9HRY4;D9HRZ7;D9HRZ9;D9HS27;H8F4T3;Q9NDS6;Q9VFG5	D9HRV1_DROME;D9HRV3_DROME;D9HRV4_DROME;D9HRV5_DROME;D9HRV8_DROME;D9HRW2_DROME;D9HRW5_DROME;D9HRW7_DROME;D9HRW9_DROME;D9HRX4_DROME;D9HRY4_DROME;D9HRZ7_DROME;D9HRZ9_DROME;D9HS27_DROME;H8F4T3_DROME;Q9NDS6_DROME;Q9VFG5_DROME	Smp-30 protein;Smp-30 protein;Smp-30 protein;Smp-30 protein;Smp-30 protein;Smp-30 protein;Smp-30 protein;Smp-30 protein;Smp-30 protein;Smp-30 protein;Smp-30 protein;Smp-30 protein;Smp-30 protein;Smp-30 protein;MIP34848p1;Senescence marker protein-30 (SMP-30);RE17477p	Smp-30;Smp-30;Smp-30;Smp-30;Smp-30;Smp-30;Smp-30;Smp-30;Smp-30;Smp-30;Smp-30;Smp-30;Smp-30;Smp-30;smp-30;smp-30;smp-30	D9HRV1;D9HRV3;D9HRV4;D9HRV5;D9HRV8;D9HRW2;D9HRW5;D9HRW7;D9HRW9;D9HRX4;D9HRY4;D9HRZ7;D9HRZ9;D9HS27;H8F4T3;Q9NDS6;Q9VFG5	Drosophila melanogaster	tr		4;4;4;4;4;4;4;4;4;4;4;4;4;4;1;2;1	1	uniprot-drosophila_reviewed_unreviewed_0825_2016	>tr|D9HRV1|D9HRV1_DROME Smp-30 protein OS=Drosophila melanogaster GN=Smp-30 PE=4 SV=1;>tr|D9HRV3|D9HRV3_DROME Smp-30 protein OS=Drosophila melanogaster GN=Smp-30 PE=4 SV=1;>tr|D9HRV4|D9HRV4_DROME Smp-30 protein OS=Drosophila melanogaster GN=Smp-30 PE=4 SV=1;>tr|D9HRV5|D9HRV5_DROME Smp-30 protein OS=Drosophila melanogaster GN=Smp-30 PE=4 SV=1;>tr|D9HRV8|D9HRV8_DROME Smp-30 protein OS=Drosophila me…	3	3
TRUE	Contr / Rep	Contr	Rep	48	G3M3A2;Q06559;Q29QY2	10015.4	5725.71	-0.806692	0.806692	-42.8309	0.571691	0	4.74263e-10	2.93181e-09	47	0.112554	G3M3A2;Q06559,Q06559;Q29QY2	G3M3A2_DROME;RS3_DROME,RS3_DROME;Q29QY2_DROME	Ribosomal protein S3, isoform B;40S ribosomal protein S3,40S ribosomal protein S3;IP15838p (Fragment)	RpS3;RpS3,RpS3;	G3M3A2;Q06559,Q06559;Q29QY2	Drosophila melanogaster	tr;sp,sp;tr		1;1,1;2	1	uniprot-drosophila_reviewed_unreviewed_0825_2016	>tr|G3M3A2|G3M3A2_DROME Ribosomal protein S3, isoform B OS=Drosophila melanogaster GN=RpS3 PE=1 SV=1;>sp|Q06559|RS3_DROME 40S ribosomal protein S3 OS=Drosophila melanogaster GN=RpS3 PE=1 SV=1,>sp|Q06559|RS3_DROME 40S ribosomal protein S3 OS=Drosophila melanogaster GN=RpS3 PE=1 SV=1;>tr|Q29QY2|Q29QY2_DROME IP15838p (Fragment) OS=Drosophila melanogaster PE=2 SV=1	7	9
TRUE	Contr / Rep	Contr	Rep	30	A0A0B4LFJ1;Q23997	1183.24	3264.02	1.4639	1.4639	175.854	2.75854	0	6.6942e-10	4.01652e-09	29	0.186095	A0A0B4LFJ1;Q23997,Q23997	A0A0B4LFJ1_DROME;C5210_DROME,C5210_DROME	CG5210, isoform B;Chitinase-like protein CG5210,Chitinase-like protein CG5210	Idgf6;CG5210,CG5210	A0A0B4LFJ1;Q23997,Q23997	Drosophila melanogaster	tr;sp,sp		4;1,1	1;2,2	uniprot-drosophila_reviewed_unreviewed_0825_2016	>tr|A0A0B4LFJ1|A0A0B4LFJ1_DROME CG5210, isoform B OS=Drosophila melanogaster GN=Idgf6 PE=4 SV=1;>sp|Q23997|C5210_DROME Chitinase-like protein CG5210 OS=Drosophila melanogaster GN=CG5210 PE=1 SV=2,>sp|Q23997|C5210_DROME Chitinase-like protein CG5210 OS=Drosophila melanogaster GN=CG5210 PE=1 SV=2	5	5
TRUE	Contr / Rep	Contr	Rep	41	Q9VXI1	13790.5	25362.7	0.879035	0.879035	83.9145	1.83914	0	9.29668e-10	5.41864e-09	40	0.143397	Q9VXI1	Q9VXI1_DROME	CG9914, isoform A	CG9914	Q9VXI1	Drosophila melanogaster	tr		1	2	uniprot-drosophila_reviewed_unreviewed_0825_2016	>tr|Q9VXI1|Q9VXI1_DROME CG9914, isoform A OS=Drosophila melanogaster GN=CG9914 PE=1 SV=2	7	7
TRUE	Contr / Rep	Contr	Rep	24	Q9VXQ5	994.059	526.894	-0.91582	0.91582	-46.9958	0.530042	0	1.02372e-09	5.80111e-09	23	0.103281	Q9VXQ5	Q9VXQ5_DROME	GH13725p	Tcp-1zeta	Q9VXQ5	Drosophila melanogaster	tr		1	1	uniprot-drosophila_reviewed_unreviewed_0825_2016	>tr|Q9VXQ5|Q9VXQ5_DROME GH13725p OS=Drosophila melanogaster GN=Tcp-1zeta PE=1 SV=1	4	4
TRUE	Contr / Rep	Contr	Rep	36	Q9W303;X2JEB6	2863.34	4617.52	0.689418	0.689418	61.2633	1.61263	0	1.14347e-09	6.30452e-09	35	0.130196	Q9W303,Q9W303;X2JEB6	IDGF4_DROME,IDGF4_DROME;X2JEB6_DROME	Chitinase-like protein Idgf4,Chitinase-like protein Idgf4;Imaginal disc growth factor 4, isoform C	Idgf4	Q9W303,Q9W303;X2JEB6	Drosophila melanogaster	sp,sp;tr		2,2;1	1	uniprot-drosophila_reviewed_unreviewed_0825_2016	>sp|Q9W303|IDGF4_DROME Chitinase-like protein Idgf4 OS=Drosophila melanogaster GN=Idgf4 PE=2 SV=1,>sp|Q9W303|IDGF4_DROME Chitinase-like protein Idgf4 OS=Drosophila melanogaster GN=Idgf4 PE=2 SV=1;>tr|X2JEB6|X2JEB6_DROME Imaginal disc growth factor 4, isoform C OS=Drosophila melanogaster GN=Idgf4 PE=1 SV=1	6	6
TRUE	Contr / Rep	Contr	Rep	18	Q9V9W2;Q9V9W3	1023.69	412.777	-1.31035	1.31035	-59.6776	0.403224	0	1.22127e-09	6.55631e-09	17	0.12209	Q9V9W2;Q9V9W3	Q9V9W2_DROME;Q9V9W3_DROME	Ribosomal protein L6, isoform A;RE08669p	RpL6	Q9V9W2;Q9V9W3	Drosophila melanogaster	tr		1	1	uniprot-drosophila_reviewed_unreviewed_0825_2016	>tr|Q9V9W2|Q9V9W2_DROME Ribosomal protein L6, isoform A OS=Drosophila melanogaster GN=RpL6 PE=1 SV=1;>tr|Q9V9W3|Q9V9W3_DROME RE08669p OS=Drosophila melanogaster GN=RpL6 PE=1 SV=1	3	3
TRUE	Contr / Rep	Contr	Rep	48	Q27598;Q7K2W6	1699.1	3437.03	1.01639	1.01639	102.285	2.02285	0	1.34303e-09	7.02507e-09	47	0.109334	Q27598;Q7K2W6	Q27598_DROME;Q7K2W6_DROME	Pro-phenol oxidase A1;GH04080p	;PPO1	Q27598;Q7K2W6	Drosophila melanogaster	tr		1	1	uniprot-drosophila_reviewed_unreviewed_0825_2016	>tr|Q27598|Q27598_DROME Pro-phenol oxidase A1 OS=Drosophila melanogaster PE=1 SV=1;>tr|Q7K2W6|Q7K2W6_DROME GH04080p OS=Drosophila melanogaster GN=PPO1 PE=1 SV=1	8	8
TRUE	Contr / Rep	Contr	Rep	42	Q7KRU8	16283.7	22529.5	0.468387	0.468387	38.3561	1.38356	0	2.10138e-09	1.07171e-08	41	0.0899757	Q7KRU8	Q7KRU8_DROME	Ferritin	Fer1HCH	Q7KRU8	Drosophila melanogaster	tr		1	1	uniprot-drosophila_reviewed_unreviewed_0825_2016	>tr|Q7KRU8|Q7KRU8_DROME Ferritin OS=Drosophila melanogaster GN=Fer1HCH PE=1 SV=1	6	8
TRUE	Contr / Rep	Contr	Rep	27	P02517;X2JGG6	25358.3	10139.6	-1.32246	1.32246	-60.0148	0.399852	0	3.77279e-09	1.87719e-08	26	0.129112	P02517,P02517;X2JGG6	HSP26_DROME,HSP26_DROME;X2JGG6_DROME	Heat shock protein 26,Heat shock protein 26;Heat shock protein 26, isoform B	Hsp26	P02517,P02517;X2JGG6	Drosophila melanogaster	sp,sp;tr		1,1;3	2,2;1	uniprot-drosophila_reviewed_unreviewed_0825_2016	>sp|P02517|HSP26_DROME Heat shock protein 26 OS=Drosophila melanogaster GN=Hsp26 PE=1 SV=2,>sp|P02517|HSP26_DROME Heat shock protein 26 OS=Drosophila melanogaster GN=Hsp26 PE=1 SV=2;>tr|X2JGG6|X2JGG6_DROME Heat shock protein 26, isoform B OS=Drosophila melanogaster GN=Hsp26 PE=3 SV=1	3	5
TRUE	Contr / Rep	Contr	Rep	42	Q9W5R8;R9Q794	2031.92	1223.43	-0.731913	0.731913	-39.7895	0.602105	0	4.82647e-09	2.34428e-08	41	0.101993	Q9W5R8,Q9W5R8;R9Q794	RL5_DROME,RL5_DROME;R9Q794_DROME	60S ribosomal protein L5,60S ribosomal protein L5;Ribosomal protein L5, isoform G	RpL5	Q9W5R8,Q9W5R8;R9Q794	Drosophila melanogaster	sp,sp;tr		1	2,2;1	uniprot-drosophila_reviewed_unreviewed_0825_2016	>sp|Q9W5R8|RL5_DROME 60S ribosomal protein L5 OS=Drosophila melanogaster GN=RpL5 PE=1 SV=2,>sp|Q9W5R8|RL5_DROME 60S ribosomal protein L5 OS=Drosophila melanogaster GN=RpL5 PE=1 SV=2;>tr|R9Q794|R9Q794_DROME Ribosomal protein L5, isoform G OS=Drosophila melanogaster GN=RpL5 PE=1 SV=1	6	7
TRUE	Contr / Rep	Contr	Rep	12	A0A0B4LGZ5;P46222;Q4V5R3	2937.28	1084.85	-1.43698	1.43698	-63.0661	0.369339	0	5.83964e-09	2.77043e-08	11	0.0940768	A0A0B4LGZ5;P46222,P46222;Q4V5R3	A0A0B4LGZ5_DROME;RL11_DROME,RL11_DROME;Q4V5R3_DROME	Ribosomal protein L11, isoform B;60S ribosomal protein L11,60S ribosomal protein L11;IP06777p	RpL11	A0A0B4LGZ5;P46222,P46222;Q4V5R3	Drosophila melanogaster	tr;sp,sp;tr		1;1,1;2	1;2,2;1	uniprot-drosophila_reviewed_unreviewed_0825_2016	>tr|A0A0B4LGZ5|A0A0B4LGZ5_DROME Ribosomal protein L11, isoform B OS=Drosophila melanogaster GN=RpL11 PE=1 SV=1;>sp|P46222|RL11_DROME 60S ribosomal protein L11 OS=Drosophila melanogaster GN=RpL11 PE=1 SV=2,>sp|P46222|RL11_DROME 60S ribosomal protein L11 OS=Drosophila melanogaster GN=RpL11 PE=1 SV=2;>tr|Q4V5R3|Q4V5R3_DROME IP06777p OS=Drosophila melanogaster GN=RpL11 PE=2 SV=1	2	2
TRUE	Contr / Rep	Contr	Rep	96	Q8IPB7	4950.58	8490.5	0.778253	0.778253	71.5053	1.71505	0	7.01721e-09	3.25344e-08	95	0.1362	Q8IPB7	Q8IPB7_DROME	Alpha-mannosidase	LManII	Q8IPB7	Drosophila melanogaster	tr		1	1	uniprot-drosophila_reviewed_unreviewed_0825_2016	>tr|Q8IPB7|Q8IPB7_DROME Alpha-mannosidase OS=Drosophila melanogaster GN=LManII PE=1 SV=1	14	16
TRUE	Contr / Rep	Contr	Rep	24	M9PFF0;P41126	5461.76	3084.6	-0.824281	0.824281	-43.5236	0.564764	0	7.21999e-09	3.27306e-08	23	0.100398	M9PFF0;P41126,P41126	M9PFF0_DROME;RL13_DROME,RL13_DROME	60S ribosomal protein L13	RpL13	M9PFF0;P41126,P41126	Drosophila melanogaster	tr;sp,sp		1	1	uniprot-drosophila_reviewed_unreviewed_0825_2016	>tr|M9PFF0|M9PFF0_DROME 60S ribosomal protein L13 OS=Drosophila melanogaster GN=RpL13 PE=1 SV=1;>sp|P41126|RL13_DROME 60S ribosomal protein L13 OS=Drosophila melanogaster GN=RpL13 PE=1 SV=1,>sp|P41126|RL13_DROME 60S ribosomal protein L13 OS=Drosophila melanogaster GN=RpL13 PE=1 SV=1	4	4
TRUE	Contr / Rep	Contr	Rep	18	E1JJM9;P48149;Q6XIM8	6999.88	3370.23	-1.05448	1.05448	-51.853	0.48147	0	7.77573e-09	3.44837e-08	17	0.119885	E1JJM9;P48149,P48149;Q6XIM8	E1JJM9_DROME;RS15A_DROME,RS15A_DROME;RS15A_DROYA	Ribosomal protein S15Aa, isoform F;40S ribosomal protein S15Aa,40S ribosomal protein S15Aa;40S ribosomal protein S15a	RpS15Aa	E1JJM9;P48149,P48149;Q6XIM8	Drosophila melanogaster;Drosophila melanogaster,Drosophila melanogaster;Drosophila yakuba	tr;sp,sp;sp		1;1,1;2	1;2,2;3	uniprot-drosophila_reviewed_unreviewed_0825_2016	>tr|E1JJM9|E1JJM9_DROME Ribosomal protein S15Aa, isoform F OS=Drosophila melanogaster GN=RpS15Aa PE=1 SV=1;>sp|P48149|RS15A_DROME 40S ribosomal protein S15Aa OS=Drosophila melanogaster GN=RpS15Aa PE=1 SV=2,>sp|P48149|RS15A_DROME 40S ribosomal protein S15Aa OS=Drosophila melanogaster GN=RpS15Aa PE=1 SV=2;>sp|Q6XIM8|RS15A_DROYA 40S ribosomal protein S15a OS=Drosophila yakuba GN=RpS15Aa PE=2 SV=3	3	3
TRUE	Contr / Rep	Contr	Rep	60	A8DYI3;Q7JXB5	20059.4	12404.6	-0.693396	0.693396	-38.1604	0.618396	0	8.99149e-09	3.90269e-08	59	0.132154	A8DYI3;Q7JXB5	A8DYI3_DROME;Q7JXB5_DROME	Uncharacterized protein, isoform B;RE12569p	CG10924	A8DYI3;Q7JXB5	Drosophila melanogaster	tr		1	1	uniprot-drosophila_reviewed_unreviewed_0825_2016	>tr|A8DYI3|A8DYI3_DROME Uncharacterized protein, isoform B OS=Drosophila melanogaster GN=CG10924 PE=1 SV=1;>tr|Q7JXB5|Q7JXB5_DROME RE12569p OS=Drosophila melanogaster GN=CG10924 PE=1 SV=1	11	11
TRUE	Contr / Rep	Contr	Rep	72	A5XCL5;Q9VSW2	29093.8	36339	0.320805	0.320805	24.9027	1.24903	0	1.03186e-08	4.38541e-08	71	0.119571	A5XCL5;Q9VSW2	A5XCL5_DROME;Q9VSW2_DROME	LD36265p (Fragment);RE14081p	UGP	A5XCL5;Q9VSW2	Drosophila melanogaster	tr		1	1;2	uniprot-drosophila_reviewed_unreviewed_0825_2016	>tr|A5XCL5|A5XCL5_DROME LD36265p (Fragment) OS=Drosophila melanogaster GN=UGP PE=1 SV=1;>tr|Q9VSW2|Q9VSW2_DROME RE14081p OS=Drosophila melanogaster GN=UGP PE=1 SV=2	10	12
TRUE	Contr / Rep	Contr	Rep	42	C6TP73;Q7KT11;Q8SZU0;Q9VIJ0	2703.79	4779.16	0.821773	0.821773	76.7577	1.76758	0	1.81523e-08	7.5573e-08	41	0.155418	C6TP73;Q7KT11;Q8SZU0;Q9VIJ0	C6TP73_DROME;Q7KT11_DROME;Q8SZU0_DROME;Q9VIJ0_DROME	LP17834p (Fragment);CG9331, isoform B;CG9331, isoform C;CG9331, isoform A	CG9331-RA;CG9331;CG9331;CG9331	C6TP73;Q7KT11;Q8SZU0;Q9VIJ0	Drosophila melanogaster	tr		2;1;1;1	1;1;1;3	uniprot-drosophila_reviewed_unreviewed_0825_2016	>tr|C6TP73|C6TP73_DROME LP17834p (Fragment) OS=Drosophila melanogaster GN=CG9331-RA PE=2 SV=1;>tr|Q7KT11|Q7KT11_DROME CG9331, isoform B OS=Drosophila melanogaster GN=CG9331 PE=1 SV=1;>tr|Q8SZU0|Q8SZU0_DROME CG9331, isoform C OS=Drosophila melanogaster GN=CG9331 PE=1 SV=1;>tr|Q9VIJ0|Q9VIJ0_DROME CG9331, isoform A OS=Drosophila melanogaster GN=CG9331 PE=1 SV=3	7	7
TRUE	Contr / Rep	Contr	Rep	18	Q95T84;Q9VZJ8	936.711	1874.99	1.00121	1.00121	100.167	2.00167	0	3.74113e-08	1.52638e-07	17	0.121002	Q95T84;Q9VZJ8	Q95T84_DROME;Q9VZJ8_DROME	GH12991p;RH40737p	CG11594	Q95T84;Q9VZJ8	Drosophila melanogaster	tr		2;1	1	uniprot-drosophila_reviewed_unreviewed_0825_2016	>tr|Q95T84|Q95T84_DROME GH12991p OS=Drosophila melanogaster GN=CG11594 PE=2 SV=1;>tr|Q9VZJ8|Q9VZJ8_DROME RH40737p OS=Drosophila melanogaster GN=CG11594 PE=1 SV=1	3	3
TRUE	Contr / Rep	Contr	Rep	48	A1Z893	14481.1	17658	0.286152	0.286152	21.9384	1.21938	0	4.44194e-08	1.74261e-07	47	0.0930297	A1Z893	A1Z893_DROME	DI01187p	CG12896-RA	A1Z893	Drosophila melanogaster	tr		2	1	uniprot-drosophila_reviewed_unreviewed_0825_2016	>tr|A1Z893|A1Z893_DROME DI01187p OS=Drosophila melanogaster GN=CG12896-RA PE=2 SV=1	7	8
TRUE	Contr / Rep	Contr	Rep	38	D5SHR2;Q9VFC8	2111.89	3168.38	0.585212	0.585212	50.0259	1.50026	0	4.39887e-08	1.74261e-07	37	0.123923	D5SHR2;Q9VFC8,Q9VFC8	D5SHR2_DROME;GYS_DROME,GYS_DROME	GH19589p;Glycogen [starch] synthase,Glycogen [starch] synthase	CG6904-RA;GlyS,GlyS	D5SHR2;Q9VFC8,Q9VFC8	Drosophila melanogaster	tr;sp,sp		2;1,1	1;2,2	uniprot-drosophila_reviewed_unreviewed_0825_2016	>tr|D5SHR2|D5SHR2_DROME GH19589p OS=Drosophila melanogaster GN=CG6904-RA PE=2 SV=1;>sp|Q9VFC8|GYS_DROME Glycogen [starch] synthase OS=Drosophila melanogaster GN=GlyS PE=1 SV=2,>sp|Q9VFC8|GYS_DROME Glycogen [starch] synthase OS=Drosophila melanogaster GN=GlyS PE=1 SV=2	7	9
TRUE	Contr / Rep	Contr	Rep	24	B3N1G9;B3P9W1;B4H9N7;B4IL76;B4JZQ9;B4L7F0;B4MEW8;B4NHI4;P55830;Q29CU2	5349.43	2677.18	-0.998672	0.998672	-49.954	0.50046	0	5.18303e-08	1.99498e-07	23	0.139457	B3N1G9;B3P9W1;B4H9N7;B4IL76;B4JZQ9;B4L7F0;B4MEW8;B4NHI4;P55830,P55830;Q29CU2	RS3A_DROAN;RS3A_DROER;RS3A_DROPE;RS3A_DROSE;RS3A_DROGR;RS3A_DROMO;RS3A_DROVI;RS3A_DROWI;RS3A_DROME,RS3A_DROME;RS3A_DROPS	40S ribosomal protein S3a	RpS3A	B3N1G9;B3P9W1;B4H9N7;B4IL76;B4JZQ9;B4L7F0;B4MEW8;B4NHI4;P55830,P55830;Q29CU2	Drosophila ananassae;Drosophila erecta;Drosophila persimilis;Drosophila sechellia;Drosophila grimshawi;Drosophila mojavensis;Drosophila virilis;Drosophila willistoni;Drosophila melanogaster,Drosophila melanogaster;Drosophila pseudoobscura pseudoobscura	sp		3;3;3;3;3;3;3;3;1,1;3	1;1;1;1;1;1;1;1;4,4;1	uniprot-drosophila_reviewed_unreviewed_0825_2016	>sp|B3N1G9|RS3A_DROAN 40S ribosomal protein S3a OS=Drosophila ananassae GN=RpS3A PE=3 SV=1;>sp|B3P9W1|RS3A_DROER 40S ribosomal protein S3a OS=Drosophila erecta GN=RpS3A PE=3 SV=1;>sp|B4H9N7|RS3A_DROPE 40S ribosomal protein S3a OS=Drosophila persimilis GN=RpS3A PE=3 SV=1;>sp|B4IL76|RS3A_DROSE 40S ribosomal protein S3a OS=Drosophila sechellia GN=RpS3A PE=3 SV=1;>sp|B4JZQ9|RS3A_DROGR 40S ribosomal p…	4	4
TRUE	Contr / Rep	Contr	Rep	60	A1ZBL0;E0R982;Q24560	33840.6	27081.2	-0.321466	0.321466	-19.9744	0.800256	0	5.87871e-08	2.22085e-07	59	0.0627153	A1ZBL0;E0R982;Q24560,Q24560	A1ZBL0_DROME;E0R982_DROME;TBB1_DROME,TBB1_DROME	Beta-Tubulin at 56D, isoform A;GH12877p;Tubulin beta-1 chain,Tubulin beta-1 chain	betaTub56D;betaTub56D-RA;betaTub56D,betaTub56D	A1ZBL0;E0R982;Q24560,Q24560	Drosophila melanogaster	tr;tr;sp,sp		1;2;1,1	1;1;2,2	uniprot-drosophila_reviewed_unreviewed_0825_2016	>tr|A1ZBL0|A1ZBL0_DROME Beta-Tubulin at 56D, isoform A OS=Drosophila melanogaster GN=betaTub56D PE=1 SV=1;>tr|E0R982|E0R982_DROME GH12877p OS=Drosophila melanogaster GN=betaTub56D-RA PE=2 SV=1;>sp|Q24560|TBB1_DROME Tubulin beta-1 chain OS=Drosophila melanogaster GN=betaTub56D PE=1 SV=2,>sp|Q24560|TBB1_DROME Tubulin beta-1 chain OS=Drosophila melanogaster GN=betaTub56D PE=1 SV=2	9	14
TRUE	Contr / Rep	Contr	Rep	18	Q9V5C6	3687.43	1943.1	-0.924259	0.924259	-47.3049	0.526951	0	6.11106e-08	2.26665e-07	17	0.138933	Q9V5C6	PSA3_DROME	Proteasome subunit alpha type-3	Prosalpha7	Q9V5C6	Drosophila melanogaster	sp		1	1	uniprot-drosophila_reviewed_unreviewed_0825_2016	>sp|Q9V5C6|PSA3_DROME Proteasome subunit alpha type-3 OS=Drosophila melanogaster GN=Prosalpha7 PE=1 SV=1,>sp|Q9V5C6|PSA3_DROME Proteasome subunit alpha type-3 OS=Drosophila melanogaster GN=Prosalpha7 PE=1 SV=1	3	3
TRUE	Contr / Rep	Contr	Rep	24	P09180	3703.18	2306.06	-0.683333	0.683333	-37.7275	0.622725	0	6.60153e-08	2.40484e-07	23	0.149672	P09180	RL4_DROME	60S ribosomal protein L4	RpL4	P09180	Drosophila melanogaster	sp		1	2	uniprot-drosophila_reviewed_unreviewed_0825_2016	>sp|P09180|RL4_DROME 60S ribosomal protein L4 OS=Drosophila melanogaster GN=RpL4 PE=1 SV=2,>sp|P09180|RL4_DROME 60S ribosomal protein L4 OS=Drosophila melanogaster GN=RpL4 PE=1 SV=2	4	4
TRUE	Contr / Rep	Contr	Rep	12	A0A0B4K7X5;A0A0B4LFW5;A0A0B4LG29;A0A0B4LG72;E1JGQ3;Q9W2J6	79.1535	169.671	1.10001	1.10001	114.357	2.14357	0	7.63817e-08	2.73366e-07	11	0.0853202	A0A0B4K7X5;A0A0B4LFW5;A0A0B4LG29;A0A0B4LG72;E1JGQ3;Q9W2J6	A0A0B4K7X5_DROME;A0A0B4LFW5_DROME;A0A0B4LG29_DROME;A0A0B4LG72_DROME;E1JGQ3_DROME;Q9W2J6_DROME	Glycogenin, isoform D;Glycogenin, isoform E;Glycogenin, isoform G;Glycogenin, isoform H;Glycogenin, isoform I;Glycogenin, isoform B	Glycogenin	A0A0B4K7X5;A0A0B4LFW5;A0A0B4LG29;A0A0B4LG72;E1JGQ3;Q9W2J6	Drosophila melanogaster	tr		1	1;1;1;1;1;3	uniprot-drosophila_reviewed_unreviewed_0825_2016	>tr|A0A0B4K7X5|A0A0B4K7X5_DROME Glycogenin, isoform D OS=Drosophila melanogaster GN=Glycogenin PE=1 SV=1;>tr|A0A0B4LFW5|A0A0B4LFW5_DROME Glycogenin, isoform E OS=Drosophila melanogaster GN=Glycogenin PE=1 SV=1;>tr|A0A0B4LG29|A0A0B4LG29_DROME Glycogenin, isoform G OS=Drosophila melanogaster GN=Glycogenin PE=1 SV=1;>tr|A0A0B4LG72|A0A0B4LG72_DROME Glycogenin, isoform H OS=Drosophila melanogaster GN=…	1	2
TRUE	Contr / Rep	Contr	Rep	60	A0A0B4LFH8;E2QCF1;Q7KN85	6750.68	9820.17	0.540716	0.540716	45.4694	1.45469	0	7.90127e-08	2.77907e-07	59	0.186817	A0A0B4LFH8;E2QCF1;Q7KN85	A0A0B4LFH8_DROME;E2QCF1_DROME;Q7KN85_DROME	ATP-citrate synthase	ATPCL	A0A0B4LFH8;E2QCF1;Q7KN85	Drosophila melanogaster	tr		1	1	uniprot-drosophila_reviewed_unreviewed_0825_2016	>tr|A0A0B4LFH8|A0A0B4LFH8_DROME ATP-citrate synthase OS=Drosophila melanogaster GN=ATPCL PE=1 SV=1;>tr|E2QCF1|E2QCF1_DROME ATP-citrate synthase OS=Drosophila melanogaster GN=ATPCL PE=1 SV=1;>tr|Q7KN85|Q7KN85_DROME ATP-citrate synthase OS=Drosophila melanogaster GN=ATPCL PE=1 SV=1	9	10
TRUE	Contr / Rep	Contr	Rep	96	Q7KHA1;Q9VUY9	26206.4	29366.7	0.164264	0.164264	12.0594	1.12059	0	8.76434e-08	3.03038e-07	95	0.105534	Q7KHA1;Q9VUY9,Q9VUY9	PGM_DROSI;PGM_DROME,PGM_DROME	Phosphoglucomutase	Pgm	Q7KHA1;Q9VUY9,Q9VUY9	Drosophila simulans;Drosophila melanogaster,Drosophila melanogaster	sp		3;1,1	1	uniprot-drosophila_reviewed_unreviewed_0825_2016	>sp|Q7KHA1|PGM_DROSI Phosphoglucomutase OS=Drosophila simulans GN=Pgm PE=3 SV=1;>sp|Q9VUY9|PGM_DROME Phosphoglucomutase OS=Drosophila melanogaster GN=Pgm PE=1 SV=1,>sp|Q9VUY9|PGM_DROME Phosphoglucomutase OS=Drosophila melanogaster GN=Pgm PE=1 SV=1	14	17
TRUE	Contr / Rep	Contr	Rep	49	A1Z7Z4;C9QP80;Q7K2P3;Q8IGD2	4499.59	3780.04	-0.251389	0.251389	-15.9913	0.840087	0	9.23971e-08	3.1415e-07	48	0.138513	A1Z7Z4;C9QP80;Q7K2P3;Q8IGD2	A1Z7Z4_DROME;C9QP80_DROME;Q7K2P3_DROME;Q8IGD2_DROME	CG1648, isoform B;FI07350p (Fragment);CG1648, isoform A;RH51979p (Fragment)	CG1648;CG1648-RB;CG1648;CG1648	A1Z7Z4;C9QP80;Q7K2P3;Q8IGD2	Drosophila melanogaster	tr		1;2;1;2	1	uniprot-drosophila_reviewed_unreviewed_0825_2016	>tr|A1Z7Z4|A1Z7Z4_DROME CG1648, isoform B OS=Drosophila melanogaster GN=CG1648 PE=1 SV=1;>tr|C9QP80|C9QP80_DROME FI07350p (Fragment) OS=Drosophila melanogaster GN=CG1648-RB PE=2 SV=1;>tr|Q7K2P3|Q7K2P3_DROME CG1648, isoform A OS=Drosophila melanogaster GN=CG1648 PE=1 SV=1;>tr|Q8IGD2|Q8IGD2_DROME RH51979p (Fragment) OS=Drosophila melanogaster GN=CG1648 PE=2 SV=1	6	9
TRUE	Contr / Rep	Contr	Rep	36	F3YDH3;P00967;X2J516	430.614	801.145	0.895667	0.895667	86.0469	1.86047	0	1.12636e-07	3.76686e-07	35	0.150559	F3YDH3;P00967,P00967;X2J516	F3YDH3_DROME;PUR2_DROME,PUR2_DROME;X2J516_DROME	RH01206p;Trifunctional purine biosynthetic protein adenosine-3,Trifunctional purine biosynthetic protein adenosine-3;Adenosine 3, isoform C	ade3-RA;ade3,ade3;ade3	F3YDH3;P00967,P00967;X2J516	Drosophila melanogaster	tr;sp,sp;tr		2;1,1;1	1;2,2;1	uniprot-drosophila_reviewed_unreviewed_0825_2016	>tr|F3YDH3|F3YDH3_DROME RH01206p OS=Drosophila melanogaster GN=ade3-RA PE=2 SV=1;>sp|P00967|PUR2_DROME Trifunctional purine biosynthetic protein adenosine-3 OS=Drosophila melanogaster GN=ade3 PE=1 SV=2,>sp|P00967|PUR2_DROME Trifunctional purine biosynthetic protein adenosine-3 OS=Drosophila melanogaster GN=ade3 PE=1 SV=2;>tr|X2J516|X2J516_DROME Adenosine 3, isoform C OS=Drosophila melanogaster GN…	6	6
TRUE	Contr / Rep	Contr	Rep	44	Q9VQF7	2320.75	4033.96	0.797608	0.797608	73.8217	1.73822	0	1.22927e-07	4.04468e-07	43	0.138127	Q9VQF7	Q9VQF7_DROME	Bacchus, isoform A	Bacc	Q9VQF7	Drosophila melanogaster	tr		1	1	uniprot-drosophila_reviewed_unreviewed_0825_2016	>tr|Q9VQF7|Q9VQF7_DROME Bacchus, isoform A OS=Drosophila melanogaster GN=Bacc PE=1 SV=1	4	11
TRUE	Contr / Rep	Contr	Rep	54	A4V0N4;Q27331	7996.14	5990.2	-0.4167	0.4167	-25.0864	0.749136	0	1.6983e-07	5.49926e-07	53	0.0758633	A4V0N4;Q27331,Q27331	A4V0N4_DROME;VATA2_DROME,VATA2_DROME	MIP16230p;V-type proton ATPase catalytic subunit A isoform 2,V-type proton ATPase catalytic subunit A isoform 2	Vha68-2	A4V0N4;Q27331,Q27331	Drosophila melanogaster	tr;sp,sp		1	1;2,2	uniprot-drosophila_reviewed_unreviewed_0825_2016	>tr|A4V0N4|A4V0N4_DROME MIP16230p OS=Drosophila melanogaster GN=Vha68-2 PE=1 SV=1;>sp|Q27331|VATA2_DROME V-type proton ATPase catalytic subunit A isoform 2 OS=Drosophila melanogaster GN=Vha68-2 PE=1 SV=2,>sp|Q27331|VATA2_DROME V-type proton ATPase catalytic subunit A isoform 2 OS=Drosophila melanogaster GN=Vha68-2 PE=1 SV=2	9	10
TRUE	Contr / Rep	Contr	Rep	18	M9PCE8;Q9VLJ6	211.277	502.632	1.25037	1.25037	137.902	2.37902	0	1.87353e-07	5.97186e-07	17	0.157969	M9PCE8;Q9VLJ6,Q9VLJ6	M9PCE8_DROME;ACER_DROME,ACER_DROME	Angiotensin-converting enzyme-related, isoform B;Angiotensin-converting enzyme-related protein,Angiotensin-converting enzyme-related protein	Acer	M9PCE8;Q9VLJ6,Q9VLJ6	Drosophila melanogaster	tr;sp,sp		3;1,1	1	uniprot-drosophila_reviewed_unreviewed_0825_2016	>tr|M9PCE8|M9PCE8_DROME Angiotensin-converting enzyme-related, isoform B OS=Drosophila melanogaster GN=Acer PE=3 SV=1;>sp|Q9VLJ6|ACER_DROME Angiotensin-converting enzyme-related protein OS=Drosophila melanogaster GN=Acer PE=1 SV=1,>sp|Q9VLJ6|ACER_DROME Angiotensin-converting enzyme-related protein OS=Drosophila melanogaster GN=Acer PE=1 SV=1	2	3
TRUE	Contr / Rep	Contr	Rep	18	B4F625;B4F631;C0MM13;Q9W4U2	577.151	861.851	0.57849	0.57849	49.3285	1.49329	0	2.16455e-07	6.79335e-07	17	0.102969	B4F625;B4F631;C0MM13;Q9W4U2	B4F625_DROME;B4F631_DROME;C0MM13_DROME;Q9W4U2_DROME	CG3603-PA;CG3603-PA;CG3603-PA;CG3603, isoform A	CG3603	B4F625;B4F631;C0MM13;Q9W4U2	Drosophila melanogaster	tr		4;4;4;1	1;1;1;2	uniprot-drosophila_reviewed_unreviewed_0825_2016	>tr|B4F625|B4F625_DROME CG3603-PA OS=Drosophila melanogaster GN=CG3603 PE=4 SV=1;>tr|B4F631|B4F631_DROME CG3603-PA OS=Drosophila melanogaster GN=CG3603 PE=4 SV=1;>tr|C0MM13|C0MM13_DROME CG3603-PA OS=Drosophila melanogaster GN=CG3603 PE=4 SV=1;>tr|Q9W4U2|Q9W4U2_DROME CG3603, isoform A OS=Drosophila melanogaster GN=CG3603 PE=1 SV=2	2	3
TRUE	Contr / Rep	Contr	Rep	12	A0A0B4KH34;P22464	2325.49	1456.13	-0.675396	0.675396	-37.384	0.62616	0	3.39212e-07	1.04847e-06	11	0.063063	A0A0B4KH34;P22464,P22464	A0A0B4KH34_DROME;ANXB9_DROME,ANXB9_DROME	Annexin;Annexin B9,Annexin B9	AnxB9	A0A0B4KH34;P22464,P22464	Drosophila melanogaster	tr;sp,sp		1;2,2	1;2,2	uniprot-drosophila_reviewed_unreviewed_0825_2016	>tr|A0A0B4KH34|A0A0B4KH34_DROME Annexin OS=Drosophila melanogaster GN=AnxB9 PE=1 SV=1;>sp|P22464|ANXB9_DROME Annexin B9 OS=Drosophila melanogaster GN=AnxB9 PE=2 SV=2,>sp|P22464|ANXB9_DROME Annexin B9 OS=Drosophila melanogaster GN=AnxB9 PE=2 SV=2	2	2
TRUE	Contr / Rep	Contr	Rep	18	A0A0B4LFL3;O96827	10247.7	8007.95	-0.355798	0.355798	-21.8563	0.781437	0	4.94619e-07	1.506e-06	17	0.0505462	A0A0B4LFL3;O96827,O96827	A0A0B4LFL3_DROME;EF1B_DROME,EF1B_DROME	Elongation factor 1 beta, isoform C;Probable elongation factor 1-beta,Probable elongation factor 1-beta	Ef1beta	A0A0B4LFL3;O96827,O96827	Drosophila melanogaster	tr;sp,sp		3;1,1	1;3,3	uniprot-drosophila_reviewed_unreviewed_0825_2016	>tr|A0A0B4LFL3|A0A0B4LFL3_DROME Elongation factor 1 beta, isoform C OS=Drosophila melanogaster GN=Ef1beta PE=3 SV=1;>sp|O96827|EF1B_DROME Probable elongation factor 1-beta OS=Drosophila melanogaster GN=Ef1beta PE=1 SV=3,>sp|O96827|EF1B_DROME Probable elongation factor 1-beta OS=Drosophila melanogaster GN=Ef1beta PE=1 SV=3	3	3
TRUE	Contr / Rep	Contr	Rep	12	Q9V8Y2	2317.56	3167.94	0.45094	0.45094	36.693	1.36693	0	6.37504e-07	1.91251e-06	11	0.0439985	Q9V8Y2	OB56A_DROME	General odorant-binding protein 56a	Obp56a	Q9V8Y2	Drosophila melanogaster	sp		2	1	uniprot-drosophila_reviewed_unreviewed_0825_2016	>sp|Q9V8Y2|OB56A_DROME General odorant-binding protein 56a OS=Drosophila melanogaster GN=Obp56a PE=2 SV=1,>sp|Q9V8Y2|OB56A_DROME General odorant-binding protein 56a OS=Drosophila melanogaster GN=Obp56a PE=2 SV=1	2	2
TRUE	Contr / Rep	Contr	Rep	60	P35421	1007.26	1378.76	0.452939	0.452939	36.8826	1.36883	0	6.5337e-07	1.9317e-06	59	0.0967083	P35421	PUR4_DROME	Phosphoribosylformylglycinamidine synthase	ade2	P35421	Drosophila melanogaster	sp		2	2	uniprot-drosophila_reviewed_unreviewed_0825_2016	>sp|P35421|PUR4_DROME Phosphoribosylformylglycinamidine synthase OS=Drosophila melanogaster GN=ade2 PE=2 SV=2,>sp|P35421|PUR4_DROME Phosphoribosylformylglycinamidine synthase OS=Drosophila melanogaster GN=ade2 PE=2 SV=2	10	10
TRUE	Contr / Rep	Contr	Rep	75	P22465	2765.42	3432.18	0.31163	0.31163	24.1109	1.24111	0	9.90842e-07	2.8876e-06	74	0.131125	P22465	ANX10_DROME	Annexin B10	AnxB10	P22465	Drosophila melanogaster	sp		2	3	uniprot-drosophila_reviewed_unreviewed_0825_2016	>sp|P22465|ANX10_DROME Annexin B10 OS=Drosophila melanogaster GN=AnxB10 PE=2 SV=3,>sp|P22465|ANX10_DROME Annexin B10 OS=Drosophila melanogaster GN=AnxB10 PE=2 SV=3	10	13
TRUE	Contr / Rep	Contr	Rep	30	Q9W392	1586.8	675.009	-1.23314	1.23314	-57.4609	0.425391	0	1.14337e-06	3.28518e-06	29	0.149588	Q9W392	Q9W392_DROME	CG7033	CG7033	Q9W392	Drosophila melanogaster	tr		1	2	uniprot-drosophila_reviewed_unreviewed_0825_2016	>tr|Q9W392|Q9W392_DROME CG7033 OS=Drosophila melanogaster GN=CG7033 PE=1 SV=2	5	5
TRUE	Contr / Rep	Contr	Rep	12	C5WLR2;Q8MT28;Q9VRU1	264.041	518.064	0.972365	0.972365	96.2055	1.96205	0	1.21423e-06	3.44031e-06	11	0.113464	C5WLR2;Q8MT28;Q9VRU1	C5WLR2_DROME;Q8MT28_DROME;Q9VRU1_DROME	MIP04215p (Fragment);Aldose 1-epimerase;Aldose 1-epimerase	CG10467-RA;CG10467;CG10467-RA	C5WLR2;Q8MT28;Q9VRU1	Drosophila melanogaster	tr		2;2;1	1	uniprot-drosophila_reviewed_unreviewed_0825_2016	>tr|C5WLR2|C5WLR2_DROME MIP04215p (Fragment) OS=Drosophila melanogaster GN=CG10467-RA PE=2 SV=1;>tr|Q8MT28|Q8MT28_DROME Aldose 1-epimerase OS=Drosophila melanogaster GN=CG10467 PE=2 SV=1;>tr|Q9VRU1|Q9VRU1_DROME Aldose 1-epimerase OS=Drosophila melanogaster GN=CG10467-RA PE=1 SV=1	2	2
TRUE	Contr / Rep	Contr	Rep	42	A0A0B4KF46;Q8T0L3	2805.8	2000.89	-0.48777	0.48777	-28.6873	0.713127	0	1.58255e-06	4.42248e-06	41	0.12838	A0A0B4KF46;Q8T0L3	A0A0B4KF46_DROME;Q8T0L3_DROME	Ubiquitin activating enzyme 1, isoform C;GH24511p	Uba1	A0A0B4KF46;Q8T0L3	Drosophila melanogaster	tr		1	1	uniprot-drosophila_reviewed_unreviewed_0825_2016	>tr|A0A0B4KF46|A0A0B4KF46_DROME Ubiquitin activating enzyme 1, isoform C OS=Drosophila melanogaster GN=Uba1 PE=1 SV=1;>tr|Q8T0L3|Q8T0L3_DROME GH24511p OS=Drosophila melanogaster GN=Uba1 PE=1 SV=1	7	8
TRUE	Contr / Rep	Contr	Rep	18	Q9VW59	1647.74	1083.76	-0.604444	0.604444	-34.2275	0.657725	0	1.6856e-06	4.64678e-06	17	0.106954	Q9VW59	Q9VW59_DROME	LD16419p	RhoGDI	Q9VW59	Drosophila melanogaster	tr		1	1	uniprot-drosophila_reviewed_unreviewed_0825_2016	>tr|Q9VW59|Q9VW59_DROME LD16419p OS=Drosophila melanogaster GN=RhoGDI PE=1 SV=1	3	3
TRUE	Contr / Rep	Contr	Rep	6	M9MRC9;P41092	1799.6	465.56	-1.95063	1.95063	-74.1298	0.258702	0	1.89003e-06	5.14089e-06	5	0.176039	M9MRC9;P41092,P41092	M9MRC9_DROME;RL27A_DROME,RL27A_DROME	Ribosomal protein L27A, isoform C;60S ribosomal protein L27a,60S ribosomal protein L27a	RpL27A	M9MRC9;P41092,P41092	Drosophila melanogaster	tr;sp,sp		3;1,1	1;2,2	uniprot-drosophila_reviewed_unreviewed_0825_2016	>tr|M9MRC9|M9MRC9_DROME Ribosomal protein L27A, isoform C OS=Drosophila melanogaster GN=RpL27A PE=3 SV=1;>sp|P41092|RL27A_DROME 60S ribosomal protein L27a OS=Drosophila melanogaster GN=RpL27A PE=1 SV=2,>sp|P41092|RL27A_DROME 60S ribosomal protein L27a OS=Drosophila melanogaster GN=RpL27A PE=1 SV=2	1	1
TRUE	Contr / Rep	Contr	Rep	42	Q9W0S7	993.442	757.582	-0.391033	0.391033	-23.7416	0.762584	0	2.08528e-06	5.45382e-06	41	0.158326	Q9W0S7	Q9W0S7_DROME	LD20211p	Tudor-SN	Q9W0S7	Drosophila melanogaster	tr		1	1	uniprot-drosophila_reviewed_unreviewed_0825_2016	>tr|Q9W0S7|Q9W0S7_DROME LD20211p OS=Drosophila melanogaster GN=Tudor-SN PE=1 SV=1	7	7
TRUE	Contr / Rep	Contr	Rep	120	H7BWS2;H7BWS3;H7BWS6;H7BWS7;H7BWU8;Q2QBM1;Q9NIW0;Q9NIW1;Q9NIW2;Q9VG31;Q9VG32	26855.8	32865.2	0.291325	0.291325	22.3764	1.22376	0	2.05543e-06	5.45382e-06	119	0.0866212	H7BWS2;H7BWS3;H7BWS6;H7BWS7;H7BWU8;Q2QBM1;Q9NIW0;Q9NIW1;Q9NIW2;Q9VG31;Q9VG32	H7BWS2_DROME;H7BWS3_DROME;H7BWS6_DROME;H7BWS7_DROME;H7BWU8_DROME;Q2QBM1_DROME;Q9NIW0_DROME;Q9NIW1_DROME;Q9NIW2_DROME;Q9VG31_DROME;Q9VG32_DROME	Malic enzyme	;;;;;Men;Men;Men;Men;Men;Men	H7BWS2;H7BWS3;H7BWS6;H7BWS7;H7BWU8;Q2QBM1;Q9NIW0;Q9NIW1;Q9NIW2;Q9VG31;Q9VG32	Drosophila melanogaster	tr		2;2;2;2;2;1;2;2;2;1;1	1	uniprot-drosophila_reviewed_unreviewed_0825_2016	>tr|H7BWS2|H7BWS2_DROME Malic enzyme OS=Drosophila melanogaster PE=2 SV=1;>tr|H7BWS3|H7BWS3_DROME Malic enzyme OS=Drosophila melanogaster PE=2 SV=1;>tr|H7BWS6|H7BWS6_DROME Malic enzyme OS=Drosophila melanogaster PE=2 SV=1;>tr|H7BWS7|H7BWS7_DROME Malic enzyme OS=Drosophila melanogaster PE=2 SV=1;>tr|H7BWU8|H7BWU8_DROME Malic enzyme OS=Drosophila melanogaster PE=2 SV=1;>tr|Q2QBM1|Q2QBM1_DROME Malic…	19	22
TRUE	Contr / Rep	Contr	Rep	6	Q9V9M7	1581.23	582.739	-1.44012	1.44012	-63.1465	0.368535	0	2.07307e-06	5.45382e-06	5	0.129345	Q9V9M7	Q9V9M7_DROME	RE62581p	RpL21	Q9V9M7	Drosophila melanogaster	tr		1	1	uniprot-drosophila_reviewed_unreviewed_0825_2016	>tr|Q9V9M7|Q9V9M7_DROME RE62581p OS=Drosophila melanogaster GN=RpL21 PE=1 SV=1	1	1
TRUE	Contr / Rep	Contr	Rep	42	A1Z992;U3NIM6	2068.96	2887.88	0.481103	0.481103	39.5811	1.39581	0	2.16698e-06	5.56649e-06	41	0.114586	A1Z992;U3NIM6	A1Z992_DROME;U3NIM6_DROME	1,4-Alpha-Glucan branching enzyme;FI23925p1 (Fragment)	AGBE;AGBE-RA	A1Z992;U3NIM6	Drosophila melanogaster	tr		1;2	1	uniprot-drosophila_reviewed_unreviewed_0825_2016	>tr|A1Z992|A1Z992_DROME 1,4-Alpha-Glucan branching enzyme OS=Drosophila melanogaster GN=AGBE PE=1 SV=1;>tr|U3NIM6|U3NIM6_DROME FI23925p1 (Fragment) OS=Drosophila melanogaster GN=AGBE-RA PE=2 SV=1	7	7
TRUE	Contr / Rep	Contr	Rep	12	A0A0B4K7G1;A0A0B4K897;A0A0B4LGX1;A1ZB77;A1ZB78;A1ZB79;A1ZB80;A1ZB83;E1JGL5;Q7JRI6;Q8IGG3;Q95RC4	64.6898	24.9697	-1.37336	1.37336	-61.4009	0.385991	0	2.18294e-06	5.56649e-06	11	0.145267	A0A0B4K7G1;A0A0B4K897;A0A0B4LGX1;A1ZB77;A1ZB78;A1ZB79;A1ZB80;A1ZB83;E1JGL5;Q7JRI6;Q8IGG3;Q95RC4	A0A0B4K7G1_DROME;A0A0B4K897_DROME;A0A0B4LGX1_DROME;A1ZB77_DROME;A1ZB78_DROME;A1ZB79_DROME;A1ZB80_DROME;A1ZB83_DROME;E1JGL5_DROME;Q7JRI6_DROME;Q8IGG3_DROME;Q95RC4_DROME	CG5174, isoform N;CG5174, isoform O;CG5174, isoform P;CG5174, isoform J;CG5174, isoform G;CG5174, isoform M;CG5174, isoform A;CG5174, isoform B;CG5174, isoform L;CG5174, isoform H;RH27395p;LD44733p	CG5174;CG5174;CG5174;CG5174;CG5174;CG5174;CG5174-RA;CG5174;CG5174;CG5174;CG5174;CG5174	A0A0B4K7G1;A0A0B4K897;A0A0B4LGX1;A1ZB77;A1ZB78;A1ZB79;A1ZB80;A1ZB83;E1JGL5;Q7JRI6;Q8IGG3;Q95RC4	Drosophila melanogaster	tr		1;1;1;1;1;1;1;1;1;1;2;2	1;1;1;1;1;2;1;1;1;1;1;1	uniprot-drosophila_reviewed_unreviewed_0825_2016	>tr|A0A0B4K7G1|A0A0B4K7G1_DROME CG5174, isoform N OS=Drosophila melanogaster GN=CG5174 PE=1 SV=1;>tr|A0A0B4K897|A0A0B4K897_DROME CG5174, isoform O OS=Drosophila melanogaster GN=CG5174 PE=1 SV=1;>tr|A0A0B4LGX1|A0A0B4LGX1_DROME CG5174, isoform P OS=Drosophila melanogaster GN=CG5174 PE=1 SV=1;>tr|A1ZB77|A1ZB77_DROME CG5174, isoform J OS=Drosophila melanogaster GN=CG5174 PE=1 SV=1;>tr|A1ZB78|A1ZB78_D…	2	2
TRUE	Contr / Rep	Contr	Rep	12	A1ZAU4;Q7K5N8	91.1887	239.564	1.39349	1.39349	162.713	2.62713	0	2.53378e-06	6.38138e-06	11	0.16005	A1ZAU4;Q7K5N8	A1ZAU4_DROME;Q7K5N8_DROME	CG4847, isoform D;CG4847, isoform A	CG4847-RD;CG4847	A1ZAU4;Q7K5N8	Drosophila melanogaster	tr		1	1	uniprot-drosophila_reviewed_unreviewed_0825_2016	>tr|A1ZAU4|A1ZAU4_DROME CG4847, isoform D OS=Drosophila melanogaster GN=CG4847-RD PE=1 SV=1;>tr|Q7K5N8|Q7K5N8_DROME CG4847, isoform A OS=Drosophila melanogaster GN=CG4847 PE=1 SV=1	2	2
TRUE	Contr / Rep	Contr	Rep	18	Q9W334;X2JEM4	7469.01	3584.28	-1.05923	1.05923	-52.0112	0.479888	0	3.89692e-06	9.69478e-06	17	0.179868	Q9W334,Q9W334;X2JEM4	RS28_DROME,RS28_DROME;X2JEM4_DROME	40S ribosomal protein S28,40S ribosomal protein S28;Ribosomal protein S28b, isoform B	RpS28b	Q9W334,Q9W334;X2JEM4	Drosophila melanogaster	sp,sp;tr		1,1;3	2,2;1	uniprot-drosophila_reviewed_unreviewed_0825_2016	>sp|Q9W334|RS28_DROME 40S ribosomal protein S28 OS=Drosophila melanogaster GN=RpS28b PE=1 SV=2,>sp|Q9W334|RS28_DROME 40S ribosomal protein S28 OS=Drosophila melanogaster GN=RpS28b PE=1 SV=2;>tr|X2JEM4|X2JEM4_DROME Ribosomal protein S28b, isoform B OS=Drosophila melanogaster GN=RpS28b PE=3 SV=1	3	4
TRUE	Contr / Rep	Contr	Rep	30	P21187	633.623	377.883	-0.745686	0.745686	-40.3616	0.596384	0	4.74384e-06	1.16596e-05	29	0.114529	P21187	PABP_DROME	Polyadenylate-binding protein	pAbp	P21187	Drosophila melanogaster	sp		1	3	uniprot-drosophila_reviewed_unreviewed_0825_2016	>sp|P21187|PABP_DROME Polyadenylate-binding protein OS=Drosophila melanogaster GN=pAbp PE=1 SV=3,>sp|P21187|PABP_DROME Polyadenylate-binding protein OS=Drosophila melanogaster GN=pAbp PE=1 SV=3	5	5
TRUE	Contr / Rep	Contr	Rep	18	B7ZWP7;C0H6Z8;D4G7H1;M9NEQ9;Q9VWG3	2374.11	1692.4	-0.488321	0.488321	-28.7146	0.712854	0	5.22767e-06	1.26958e-05	17	0.103238	B7ZWP7;C0H6Z8;D4G7H1;M9NEQ9;Q9VWG3,Q9VWG3	B7ZWP7_DROME;C0H6Z8_DROME;D4G7H1_DROME;M9NEQ9_DROME;RS10B_DROME,RS10B_DROME	RH14172p (Fragment);GM15153p (Fragment);FI14147p (Fragment);Ribosomal protein S10b, isoform D;40S ribosomal protein S10b,40S ribosomal protein S10b	RpS10b-RB;RpS10b-RB;RpS10b-RC;RpS10b;RpS10b,RpS10b	B7ZWP7;C0H6Z8;D4G7H1;M9NEQ9;Q9VWG3,Q9VWG3	Drosophila melanogaster	tr;tr;tr;tr;sp,sp		2;2;2;1;1,1	1;1;1;1;2,2	uniprot-drosophila_reviewed_unreviewed_0825_2016	>tr|B7ZWP7|B7ZWP7_DROME RH14172p (Fragment) OS=Drosophila melanogaster GN=RpS10b-RB PE=2 SV=1;>tr|C0H6Z8|C0H6Z8_DROME GM15153p (Fragment) OS=Drosophila melanogaster GN=RpS10b-RB PE=2 SV=1;>tr|D4G7H1|D4G7H1_DROME FI14147p (Fragment) OS=Drosophila melanogaster GN=RpS10b-RC PE=2 SV=1;>tr|M9NEQ9|M9NEQ9_DROME Ribosomal protein S10b, isoform D OS=Drosophila melanogaster GN=RpS10b PE=1 SV=1;>sp|Q9VWG3|R…	3	3
TRUE	Contr / Rep	Contr	Rep	12	O61650;Q9VPN5	217.271	129.178	-0.750133	0.750133	-40.5451	0.594549	0	5.90332e-06	1.4168e-05	11	0.0981771	O61650;Q9VPN5	O61650_DROME;Q9VPN5_DROME	Hsp70/Hsp90 organizing protein homolog	Hop	O61650;Q9VPN5	Drosophila melanogaster	tr		2;1	1	uniprot-drosophila_reviewed_unreviewed_0825_2016	>tr|O61650|O61650_DROME Hsp70/Hsp90 organizing protein homolog OS=Drosophila melanogaster GN=Hop PE=2 SV=1;>tr|Q9VPN5|Q9VPN5_DROME Hsp70/Hsp90 organizing protein homolog OS=Drosophila melanogaster GN=Hop PE=1 SV=1	2	2
TRUE	Contr / Rep	Contr	Rep	36	A0A0C4DHG2;Q07171	1331.37	2306.04	0.792511	0.792511	73.2086	1.73209	0	7.49151e-06	1.77706e-05	35	0.108876	A0A0C4DHG2;Q07171,Q07171	A0A0C4DHG2_DROME;GELS_DROME,GELS_DROME	Gelsolin, isoform J;Gelsolin,Gelsolin	Gel	A0A0C4DHG2;Q07171,Q07171	Drosophila melanogaster	tr;sp,sp		4;1,1	1;2,2	uniprot-drosophila_reviewed_unreviewed_0825_2016	>tr|A0A0C4DHG2|A0A0C4DHG2_DROME Gelsolin, isoform J OS=Drosophila melanogaster GN=Gel PE=4 SV=1;>sp|Q07171|GELS_DROME Gelsolin OS=Drosophila melanogaster GN=Gel PE=1 SV=2,>sp|Q07171|GELS_DROME Gelsolin OS=Drosophila melanogaster GN=Gel PE=1 SV=2	7	7
TRUE	Contr / Rep	Contr	Rep	12	P52295	162.485	64.6178	-1.3303	1.3303	-60.2315	0.397685	0	8.72625e-06	2.04615e-05	11	0.173813	P52295	IMA_DROME	Importin subunit alpha	Pen	P52295	Drosophila melanogaster	sp		1	2	uniprot-drosophila_reviewed_unreviewed_0825_2016	>sp|P52295|IMA_DROME Importin subunit alpha OS=Drosophila melanogaster GN=Pen PE=1 SV=2,>sp|P52295|IMA_DROME Importin subunit alpha OS=Drosophila melanogaster GN=Pen PE=1 SV=2	1	2
TRUE	Contr / Rep	Contr	Rep	12	F0JAG3;Q868Z9	252.936	479.298	0.92215	0.92215	89.4938	1.89494	0	9.30739e-06	2.15762e-05	11	0.122901	F0JAG3;Q868Z9,Q868Z9	F0JAG3_DROME;PPN_DROME,PPN_DROME	MIP27932p;Papilin,Papilin	Ppn-RG;Ppn,Ppn	F0JAG3;Q868Z9,Q868Z9	Drosophila melanogaster	tr;sp,sp		2;1,1	1;2,2	uniprot-drosophila_reviewed_unreviewed_0825_2016	>tr|F0JAG3|F0JAG3_DROME MIP27932p OS=Drosophila melanogaster GN=Ppn-RG PE=2 SV=1;>sp|Q868Z9|PPN_DROME Papilin OS=Drosophila melanogaster GN=Ppn PE=1 SV=2,>sp|Q868Z9|PPN_DROME Papilin OS=Drosophila melanogaster GN=Ppn PE=1 SV=2	2	2
TRUE	Contr / Rep	Contr	Rep	108	Q9Y119	21866.6	25171.9	0.203087	0.203087	15.1159	1.15116	0	1.00974e-05	2.31447e-05	107	0.0698511	Q9Y119	Q9Y119_DROME	BcDNA.GH08860	Tps1	Q9Y119	Drosophila melanogaster	tr		1	1	uniprot-drosophila_reviewed_unreviewed_0825_2016	>tr|Q9Y119|Q9Y119_DROME BcDNA.GH08860 OS=Drosophila melanogaster GN=Tps1 PE=1 SV=1	16	18
TRUE	Contr / Rep	Contr	Rep	58	Q9VQB4	5581.49	8642.01	0.630716	0.630716	54.8333	1.54833	0	1.12283e-05	2.51272e-05	57	0.119272	Q9VQB4	Q9VQB4_DROME	CG3609, isoform A	CG3609	Q9VQB4	Drosophila melanogaster	tr		1	1	uniprot-drosophila_reviewed_unreviewed_0825_2016	>tr|Q9VQB4|Q9VQB4_DROME CG3609, isoform A OS=Drosophila melanogaster GN=CG3609 PE=1 SV=1	9	12
TRUE	Contr / Rep	Contr	Rep	6	Q9VIQ8	41.5006	23.0117	-0.850765	0.850765	-44.5509	0.554491	0	1.13319e-05	2.51272e-05	5	0.0825123	Q9VIQ8	Q9VIQ8_DROME	Cytochrome c oxidase subunit 4, isoform A	COX4	Q9VIQ8	Drosophila melanogaster	tr		1	1	uniprot-drosophila_reviewed_unreviewed_0825_2016	>tr|Q9VIQ8|Q9VIQ8_DROME Cytochrome c oxidase subunit 4, isoform A OS=Drosophila melanogaster GN=COX4 PE=1 SV=1	1	1
TRUE	Contr / Rep	Contr	Rep	12	Q9VW19	47.8384	154.376	1.69021	1.69021	222.703	3.22703	0	1.12573e-05	2.51272e-05	11	0.206792	Q9VW19	Q9VW19_DROME	CG9372	CG9372	Q9VW19	Drosophila melanogaster	tr		1	1	uniprot-drosophila_reviewed_unreviewed_0825_2016	>tr|Q9VW19|Q9VW19_DROME CG9372 OS=Drosophila melanogaster GN=CG9372 PE=1 SV=1	2	2
TRUE	Contr / Rep	Contr	Rep	12	Q5U0Z2;Q9VRP2	346.97	160.78	-1.10972	1.10972	-53.6616	0.463384	0	1.18515e-05	2.58415e-05	11	0.160766	Q5U0Z2;Q9VRP2	Q5U0Z2_DROME;Q9VRP2_DROME	LD30448p;Uncharacterized protein, isoform A	CG10576	Q5U0Z2;Q9VRP2	Drosophila melanogaster	tr		2;1	2;1	uniprot-drosophila_reviewed_unreviewed_0825_2016	>tr|Q5U0Z2|Q5U0Z2_DROME LD30448p OS=Drosophila melanogaster GN=CG10576 PE=2 SV=2;>tr|Q9VRP2|Q9VRP2_DROME Uncharacterized protein, isoform A OS=Drosophila melanogaster GN=CG10576 PE=1 SV=1	2	2
TRUE	Contr / Rep	Contr	Rep	12	P50882;X2JDU0	1538.02	830.762	-0.888562	0.888562	-45.9848	0.540152	0	1.19074e-05	2.58415e-05	11	0.100528	P50882,P50882;X2JDU0	RL9_DROME,RL9_DROME;X2JDU0_DROME	60S ribosomal protein L9,60S ribosomal protein L9;Ribosomal protein L9, isoform C	RpL9	P50882,P50882;X2JDU0	Drosophila melanogaster	sp,sp;tr		1,1;4	2,2;1	uniprot-drosophila_reviewed_unreviewed_0825_2016	>sp|P50882|RL9_DROME 60S ribosomal protein L9 OS=Drosophila melanogaster GN=RpL9 PE=1 SV=2,>sp|P50882|RL9_DROME 60S ribosomal protein L9 OS=Drosophila melanogaster GN=RpL9 PE=1 SV=2;>tr|X2JDU0|X2JDU0_DROME Ribosomal protein L9, isoform C OS=Drosophila melanogaster GN=RpL9 PE=4 SV=1	2	2
TRUE	Contr / Rep	Contr	Rep	18	M9PB84;P31009	757.151	170.633	-2.14968	2.14968	-77.4638	0.225362	0	1.21867e-05	2.61692e-05	17	0.23907	M9PB84;P31009,P31009	M9PB84_DROME;RS2_DROME,RS2_DROME	Ribosomal protein S2, isoform B;40S ribosomal protein S2,40S ribosomal protein S2	RpS2	M9PB84;P31009,P31009	Drosophila melanogaster	tr;sp,sp		3;1,1	1;2,2	uniprot-drosophila_reviewed_unreviewed_0825_2016	>tr|M9PB84|M9PB84_DROME Ribosomal protein S2, isoform B OS=Drosophila melanogaster GN=RpS2 PE=3 SV=1;>sp|P31009|RS2_DROME 40S ribosomal protein S2 OS=Drosophila melanogaster GN=RpS2 PE=1 SV=2,>sp|P31009|RS2_DROME 40S ribosomal protein S2 OS=Drosophila melanogaster GN=RpS2 PE=1 SV=2	3	3
TRUE	Contr / Rep	Contr	Rep	42	C7LA95;O76935;Q9NFX2;Q9VGZ3	5686.16	4674.56	-0.282622	0.282622	-17.7904	0.822096	0	1.28741e-05	2.73575e-05	41	0.122902	C7LA95;O76935;Q9NFX2;Q9VGZ3	C7LA95_DROME;O76935_DROME;Q9NFX2_DROME;Q9VGZ3_DROME	Aconitate hydratase (Fragment);Aconitate hydratase;Aconitate hydratase;Aconitate hydratase	;Irp-1B;Irp-1B;Irp-1B	C7LA95;O76935;Q9NFX2;Q9VGZ3	Drosophila melanogaster	tr		2;2;2;1	1	uniprot-drosophila_reviewed_unreviewed_0825_2016	>tr|C7LA95|C7LA95_DROME Aconitate hydratase (Fragment) OS=Drosophila melanogaster PE=2 SV=1;>tr|O76935|O76935_DROME Aconitate hydratase OS=Drosophila melanogaster GN=Irp-1B PE=2 SV=1;>tr|Q9NFX2|Q9NFX2_DROME Aconitate hydratase OS=Drosophila melanogaster GN=Irp-1B PE=2 SV=1;>tr|Q9VGZ3|Q9VGZ3_DROME Aconitate hydratase OS=Drosophila melanogaster GN=Irp-1B PE=1 SV=1	7	7
TRUE	Contr / Rep	Contr	Rep	24	Q961N7;Q9VKW5	371.973	252.579	-0.558462	0.558462	-32.0974	0.679026	0	1.32303e-05	2.78245e-05	23	0.089766	Q961N7;Q9VKW5	Q961N7_DROME;Q9VKW5_DROME	GH13952p;CG5355	CG5355	Q961N7;Q9VKW5	Drosophila melanogaster	tr		2;1	1;2	uniprot-drosophila_reviewed_unreviewed_0825_2016	>tr|Q961N7|Q961N7_DROME GH13952p OS=Drosophila melanogaster GN=CG5355 PE=2 SV=1;>tr|Q9VKW5|Q9VKW5_DROME CG5355 OS=Drosophila melanogaster GN=CG5355 PE=1 SV=2	3	4
TRUE	Contr / Rep	Contr	Rep	36	I0DHK3;P12881	3771.67	2177.77	-0.792356	0.792356	-42.26	0.5774	0	1.48743e-05	3.09628e-05	35	0.105623	I0DHK3;P12881,P12881	I0DHK3_DROME;PSA1_DROME,PSA1_DROME	Proteasome subunit alpha type;Proteasome subunit alpha type-1,Proteasome subunit alpha type-1	Prosalpha6	I0DHK3;P12881,P12881	Drosophila melanogaster	tr;sp,sp		2;1,1	1	uniprot-drosophila_reviewed_unreviewed_0825_2016	>tr|I0DHK3|I0DHK3_DROME Proteasome subunit alpha type OS=Drosophila melanogaster GN=Prosalpha6 PE=2 SV=1;>sp|P12881|PSA1_DROME Proteasome subunit alpha type-1 OS=Drosophila melanogaster GN=Prosalpha6 PE=1 SV=1,>sp|P12881|PSA1_DROME Proteasome subunit alpha type-1 OS=Drosophila melanogaster GN=Prosalpha6 PE=1 SV=1	5	6
TRUE	Contr / Rep	Contr	Rep	10	P32100;X2J5G6	1099.7	575.514	-0.934192	0.934192	-47.6664	0.523336	0	1.52716e-05	3.14687e-05	9	0.101493	P32100,P32100;X2J5G6	RL7_DROME,RL7_DROME;X2J5G6_DROME	60S ribosomal protein L7,60S ribosomal protein L7;Ribosomal protein L7, isoform B	RpL7	P32100,P32100;X2J5G6	Drosophila melanogaster	sp,sp;tr		1,1;3	2,2;1	uniprot-drosophila_reviewed_unreviewed_0825_2016	>sp|P32100|RL7_DROME 60S ribosomal protein L7 OS=Drosophila melanogaster GN=RpL7 PE=1 SV=2,>sp|P32100|RL7_DROME 60S ribosomal protein L7 OS=Drosophila melanogaster GN=RpL7 PE=1 SV=2;>tr|X2J5G6|X2J5G6_DROME Ribosomal protein L7, isoform B OS=Drosophila melanogaster GN=RpL7 PE=3 SV=1	3	3
TRUE	Contr / Rep	Contr	Rep	18	Q7K148;Q9NHX7	656.186	342.503	-0.937988	0.937988	-47.804	0.52196	0	1.60392e-05	3.25426e-05	17	0.163008	Q7K148;Q9NHX7	Q7K148_DROME;Q9NHX7_DROME	Proteasome subunit beta type	Prosbeta5	Q7K148;Q9NHX7	Drosophila melanogaster	tr		1;3	1	uniprot-drosophila_reviewed_unreviewed_0825_2016	>tr|Q7K148|Q7K148_DROME Proteasome subunit beta type OS=Drosophila melanogaster GN=Prosbeta5 PE=1 SV=1;>tr|Q9NHX7|Q9NHX7_DROME Proteasome subunit beta type OS=Drosophila melanogaster GN=Prosbeta5 PE=3 SV=1	3	3
TRUE	Contr / Rep	Contr	Rep	12	P80455	4125.29	2529.8	-0.705471	0.705471	-38.6758	0.613242	0	1.61118e-05	3.25426e-05	11	0.113517	P80455	RS12_DROME	40S ribosomal protein S12	RpS12	P80455	Drosophila melanogaster	sp		1	2	uniprot-drosophila_reviewed_unreviewed_0825_2016	>sp|P80455|RS12_DROME 40S ribosomal protein S12 OS=Drosophila melanogaster GN=RpS12 PE=1 SV=2,>sp|P80455|RS12_DROME 40S ribosomal protein S12 OS=Drosophila melanogaster GN=RpS12 PE=1 SV=2	2	2
TRUE	Contr / Rep	Contr	Rep	12	P23128	1105.22	265.399	-2.05809	2.05809	-75.9867	0.240133	0	1.68768e-05	3.37536e-05	11	0.388643	P23128	DDX6_DROME	Putative ATP-dependent RNA helicase me31b	me31B	P23128	Drosophila melanogaster	sp		1	3	uniprot-drosophila_reviewed_unreviewed_0825_2016	>sp|P23128|DDX6_DROME Putative ATP-dependent RNA helicase me31b OS=Drosophila melanogaster GN=me31B PE=1 SV=3,>sp|P23128|DDX6_DROME Putative ATP-dependent RNA helicase me31b OS=Drosophila melanogaster GN=me31B PE=1 SV=3	2	2
TRUE	Contr / Rep	Contr	Rep	24	Q9V3W0	2577.94	6040.02	1.22833	1.22833	134.296	2.34296	0	1.78787e-05	3.49355e-05	23	0.407862	Q9V3W0	Q9V3W0_DROME	GM01181p	UK114	Q9V3W0	Drosophila melanogaster	tr		1	1	uniprot-drosophila_reviewed_unreviewed_0825_2016	>tr|Q9V3W0|Q9V3W0_DROME GM01181p OS=Drosophila melanogaster GN=UK114 PE=1 SV=1	3	5
TRUE	Contr / Rep	Contr	Rep	54	A0A0B4KHF0;Q9VA83	21856.8	30369.1	0.474524	0.474524	38.946	1.38946	0	1.79815e-05	3.49355e-05	53	0.171856	A0A0B4KHF0;Q9VA83	A0A0B4KHF0_DROME;Q9VA83_DROME	Ferritin	Fer2LCH	A0A0B4KHF0;Q9VA83	Drosophila melanogaster	tr		1	1	uniprot-drosophila_reviewed_unreviewed_0825_2016	>tr|A0A0B4KHF0|A0A0B4KHF0_DROME Ferritin OS=Drosophila melanogaster GN=Fer2LCH PE=1 SV=1;>tr|Q9VA83|Q9VA83_DROME Ferritin OS=Drosophila melanogaster GN=Fer2LCH PE=1 SV=1	8	9
TRUE	Contr / Rep	Contr	Rep	12	Q8IPB1;Q9V3I1	522.638	311.567	-0.746269	0.746269	-40.3857	0.596143	0	1.77283e-05	3.49355e-05	11	0.129744	Q8IPB1;Q9V3I1	Q8IPB1_DROME;Q9V3I1_DROME	Deoxyuridine triphosphatase, isoform B;BcDNA.LD08534	dUTPase	Q8IPB1;Q9V3I1	Drosophila melanogaster	tr		1	1	uniprot-drosophila_reviewed_unreviewed_0825_2016	>tr|Q8IPB1|Q8IPB1_DROME Deoxyuridine triphosphatase, isoform B OS=Drosophila melanogaster GN=dUTPase PE=1 SV=1;>tr|Q9V3I1|Q9V3I1_DROME BcDNA.LD08534 OS=Drosophila melanogaster GN=dUTPase PE=1 SV=1	2	2
TRUE	Contr / Rep	Contr	Rep	24	Q4V5X9;Q9W1B9	3593.55	1503.58	-1.25701	1.25701	-58.159	0.41841	0	1.93961e-05	3.70452e-05	23	0.142584	Q4V5X9;Q9W1B9	Q4V5X9_DROME;Q9W1B9_DROME	IP07888p;RE28824p	RpL12	Q4V5X9;Q9W1B9	Drosophila melanogaster	tr		2;1	1	uniprot-drosophila_reviewed_unreviewed_0825_2016	>tr|Q4V5X9|Q4V5X9_DROME IP07888p OS=Drosophila melanogaster GN=RpL12 PE=2 SV=1;>tr|Q9W1B9|Q9W1B9_DROME RE28824p OS=Drosophila melanogaster GN=RpL12 PE=1 SV=1	3	4
TRUE	Contr / Rep	Contr	Rep	18	P18053	2800	1638.01	-0.773478	0.773478	-41.4995	0.585005	0	1.94306e-05	3.70452e-05	17	0.235351	P18053	PSA4_DROME	Proteasome subunit alpha type-4	Prosalpha3	P18053	Drosophila melanogaster	sp		1	2	uniprot-drosophila_reviewed_unreviewed_0825_2016	>sp|P18053|PSA4_DROME Proteasome subunit alpha type-4 OS=Drosophila melanogaster GN=Prosalpha3 PE=1 SV=2,>sp|P18053|PSA4_DROME Proteasome subunit alpha type-4 OS=Drosophila melanogaster GN=Prosalpha3 PE=1 SV=2	3	3
TRUE	Contr / Rep	Contr	Rep	12	M9PE30;Q9VZI1	642.43	284.678	-1.17421	1.17421	-55.6872	0.443128	0	1.99921e-05	3.77628e-05	11	0.179049	M9PE30;Q9VZI1	M9PE30_DROME;Q9VZI1_DROME	Transgelin	Chd64	M9PE30;Q9VZI1	Drosophila melanogaster	tr		1	1;2	uniprot-drosophila_reviewed_unreviewed_0825_2016	>tr|M9PE30|M9PE30_DROME Transgelin OS=Drosophila melanogaster GN=Chd64 PE=1 SV=1;>tr|Q9VZI1|Q9VZI1_DROME Transgelin OS=Drosophila melanogaster GN=Chd64 PE=1 SV=2	2	2
TRUE	Contr / Rep	Contr	Rep	18	Q9VB10	224.265	334.392	0.576339	0.576339	49.1061	1.49106	0	2.03537e-05	3.80931e-05	17	0.11247	Q9VB10	Q9VB10_DROME	CG5590	CG5590	Q9VB10	Drosophila melanogaster	tr		1	1	uniprot-drosophila_reviewed_unreviewed_0825_2016	>tr|Q9VB10|Q9VB10_DROME CG5590 OS=Drosophila melanogaster GN=CG5590 PE=1 SV=1	3	3
TRUE	Contr / Rep	Contr	Rep	18	Q8INP8;Q8INP9;Q8MQQ5;Q9VHI8	519.489	190.811	-1.44495	1.44495	-63.2695	0.367305	0	2.31848e-05	4.26099e-05	17	0.203042	Q8INP8;Q8INP9;Q8MQQ5;Q9VHI8	Q8INP8_DROME;Q8INP9_DROME;Q8MQQ5_DROME;Q9VHI8_DROME	Uncharacterized protein, isoform B;RE51612p;LD44814p (Fragment);Uncharacterized protein, isoform A	CG11980	Q8INP8;Q8INP9;Q8MQQ5;Q9VHI8	Drosophila melanogaster	tr		1;1;2;1	1;1;1;2	uniprot-drosophila_reviewed_unreviewed_0825_2016	>tr|Q8INP8|Q8INP8_DROME Uncharacterized protein, isoform B OS=Drosophila melanogaster GN=CG11980 PE=1 SV=1;>tr|Q8INP9|Q8INP9_DROME RE51612p OS=Drosophila melanogaster GN=CG11980 PE=1 SV=1;>tr|Q8MQQ5|Q8MQQ5_DROME LD44814p (Fragment) OS=Drosophila melanogaster GN=CG11980 PE=2 SV=1;>tr|Q9VHI8|Q9VHI8_DROME Uncharacterized protein, isoform A OS=Drosophila melanogaster GN=CG11980 PE=1 SV=2	3	3
TRUE	Contr / Rep	Contr	Rep	24	M9PDK5;Q9V3J1	273.206	148.274	-0.88173	0.88173	-45.7284	0.542716	0	2.31402e-05	4.26099e-05	23	0.168905	M9PDK5;Q9V3J1,Q9V3J1	M9PDK5_DROME;VATH_DROME,VATH_DROME	Vacuolar H[+]-ATPase SFD subunit, isoform E;V-type proton ATPase subunit H,V-type proton ATPase subunit H	VhaSFD	M9PDK5;Q9V3J1,Q9V3J1	Drosophila melanogaster	tr;sp,sp		4;2,2	1;2,2	uniprot-drosophila_reviewed_unreviewed_0825_2016	>tr|M9PDK5|M9PDK5_DROME Vacuolar H[+]-ATPase SFD subunit, isoform E OS=Drosophila melanogaster GN=VhaSFD PE=4 SV=1;>sp|Q9V3J1|VATH_DROME V-type proton ATPase subunit H OS=Drosophila melanogaster GN=VhaSFD PE=2 SV=2,>sp|Q9V3J1|VATH_DROME V-type proton ATPase subunit H OS=Drosophila melanogaster GN=VhaSFD PE=2 SV=2	4	4
TRUE	Contr / Rep	Contr	Rep	36	Q7JR58	10251.1	12424.9	0.277456	0.277456	21.2056	1.21206	0	2.6466e-05	4.82058e-05	35	0.301667	Q7JR58	Q7JR58_DROME	CG6543, isoform A	CG6543	Q7JR58	Drosophila melanogaster	tr		1	1	uniprot-drosophila_reviewed_unreviewed_0825_2016	>tr|Q7JR58|Q7JR58_DROME CG6543, isoform A OS=Drosophila melanogaster GN=CG6543 PE=1 SV=1	6	6
TRUE	Contr / Rep	Contr	Rep	42	A8WHE8;C7LAB1;C7LAD6;E1JGQ5;Q7KVP4;Q86BS7;Q9W2H8	2683.42	3760.28	0.486765	0.486765	40.1299	1.4013	0	3.14579e-05	5.67912e-05	41	0.0763499	A8WHE8;C7LAB1;C7LAD6;E1JGQ5;Q7KVP4;Q86BS7;Q9W2H8	A8WHE8_DROME;C7LAB1_DROME;C7LAD6_DROME;E1JGQ5_DROME;Q7KVP4_DROME;Q86BS7_DROME;Q9W2H8_DROME	GH10785p;SD23689p (Fragment);GH05863p (Fragment);CG9485, isoform D;CG9485, isoform A;CG9485, isoform C;CG9485, isoform B	CG9485;CG9485-RB;CG9485-RC;CG9485;CG9485;CG9485;CG9485	A8WHE8;C7LAB1;C7LAD6;E1JGQ5;Q7KVP4;Q86BS7;Q9W2H8	Drosophila melanogaster	tr		2;2;2;1;1;1;1	1;1;1;1;1;1;3	uniprot-drosophila_reviewed_unreviewed_0825_2016	>tr|A8WHE8|A8WHE8_DROME GH10785p OS=Drosophila melanogaster GN=CG9485 PE=2 SV=1;>tr|C7LAB1|C7LAB1_DROME SD23689p (Fragment) OS=Drosophila melanogaster GN=CG9485-RB PE=2 SV=1;>tr|C7LAD6|C7LAD6_DROME GH05863p (Fragment) OS=Drosophila melanogaster GN=CG9485-RC PE=2 SV=1;>tr|E1JGQ5|E1JGQ5_DROME CG9485, isoform D OS=Drosophila melanogaster GN=CG9485 PE=1 SV=1;>tr|Q7KVP4|Q7KVP4_DROME CG9485, isoform A …	6	7
TRUE	Contr / Rep	Contr	Rep	30	H0RN81;P48375	5647.62	7315.1	0.373236	0.373236	29.5254	1.29525	0	3.20696e-05	5.73878e-05	29	0.127146	H0RN81;P48375,P48375	H0RN81_DROME;FKB12_DROME,FKB12_DROME	Peptidyl-prolyl cis-trans isomerase;12 kDa FK506-binding protein,12 kDa FK506-binding protein	FK506-bp2-RA;FK506-bp2,FK506-bp2	H0RN81;P48375,P48375	Drosophila melanogaster	tr;sp,sp		2;3,3	1;2,2	uniprot-drosophila_reviewed_unreviewed_0825_2016	>tr|H0RN81|H0RN81_DROME Peptidyl-prolyl cis-trans isomerase OS=Drosophila melanogaster GN=FK506-bp2-RA PE=2 SV=1;>sp|P48375|FKB12_DROME 12 kDa FK506-binding protein OS=Drosophila melanogaster GN=FK506-bp2 PE=3 SV=2,>sp|P48375|FKB12_DROME 12 kDa FK506-binding protein OS=Drosophila melanogaster GN=FK506-bp2 PE=3 SV=2	3	5
TRUE	Contr / Rep	Contr	Rep	6	C6TP18;Q9W3Z3	426.216	843.295	0.984453	0.984453	97.8562	1.97856	0	3.23812e-05	5.74414e-05	5	0.103214	C6TP18;Q9W3Z3	C6TP18_DROME;Q9W3Z3_DROME	Serine--pyruvate aminotransferase	Spat-RA;Spat	C6TP18;Q9W3Z3	Drosophila melanogaster	tr		2;1	1	uniprot-drosophila_reviewed_unreviewed_0825_2016	>tr|C6TP18|C6TP18_DROME Serine--pyruvate aminotransferase OS=Drosophila melanogaster GN=Spat-RA PE=2 SV=1;>tr|Q9W3Z3|Q9W3Z3_DROME Serine--pyruvate aminotransferase OS=Drosophila melanogaster GN=Spat PE=1 SV=1	1	2
TRUE	Contr / Rep	Contr	Rep	54	M9MRQ9;Q94522	13566.6	12846.1	-0.0787267	0.0787267	-5.3107	0.946893	0	3.49882e-05	6.10051e-05	53	0.0689186	M9MRQ9;Q94522,Q94522	M9MRQ9_DROME;SUCA_DROME,SUCA_DROME	Succinyl coenzyme A synthetase alpha subunit, isoform B;Succinyl-CoA ligase [ADP/GDP-forming] subunit alpha, mitochondrial,Succinyl-CoA ligase [ADP/GDP-forming] subunit alpha, mitochondrial	Scsalpha	M9MRQ9;Q94522,Q94522	Drosophila melanogaster	tr;sp,sp		3;2,2	1;3,3	uniprot-drosophila_reviewed_unreviewed_0825_2016	>tr|M9MRQ9|M9MRQ9_DROME Succinyl coenzyme A synthetase alpha subunit, isoform B OS=Drosophila melanogaster GN=Scsalpha PE=3 SV=1;>sp|Q94522|SUCA_DROME Succinyl-CoA ligase [ADP/GDP-forming] subunit alpha, mitochondrial OS=Drosophila melanogaster GN=Scsalpha PE=2 SV=3,>sp|Q94522|SUCA_DROME Succinyl-CoA ligase [ADP/GDP-forming] subunit alpha, mitochondrial OS=Drosophila melanogaster GN=Scsalpha PE=2…	4	9
TRUE	Contr / Rep	Contr	Rep	24	M9PCA2;M9PCG1;M9PCU4;Q1WWF8;Q7KTK9;Q9VM14	5474.76	6680.57	0.287174	0.287174	22.0248	1.22025	0	3.47301e-05	6.10051e-05	23	0.0779447	M9PCA2;M9PCG1;M9PCU4;Q1WWF8;Q7KTK9;Q9VM14	M9PCA2_DROME;M9PCG1_DROME;M9PCU4_DROME;Q1WWF8_DROME;Q7KTK9_DROME;Q9VM14_DROME	CG5261, isoform C;CG5261, isoform E;CG5261, isoform D;IP16013p (Fragment);CG5261, isoform A;AT21758p	muc;muc;muc;CG5261;muc;muc	M9PCA2;M9PCG1;M9PCU4;Q1WWF8;Q7KTK9;Q9VM14	Drosophila melanogaster	tr		1;1;1;2;1;1	1	uniprot-drosophila_reviewed_unreviewed_0825_2016	>tr|M9PCA2|M9PCA2_DROME CG5261, isoform C OS=Drosophila melanogaster GN=muc PE=1 SV=1;>tr|M9PCG1|M9PCG1_DROME CG5261, isoform E OS=Drosophila melanogaster GN=muc PE=1 SV=1;>tr|M9PCU4|M9PCU4_DROME CG5261, isoform D OS=Drosophila melanogaster GN=muc PE=1 SV=1;>tr|Q1WWF8|Q1WWF8_DROME IP16013p (Fragment) OS=Drosophila melanogaster GN=CG5261 PE=2 SV=1;>tr|Q7KTK9|Q7KTK9_DROME CG5261, isoform A OS=Droso…	3	4
TRUE	Contr / Rep	Contr	Rep	18	Q86P04;Q9VHA1;Q9VHA2	3053.27	4026.78	0.399271	0.399271	31.8841	1.31884	0	3.6889e-05	6.37743e-05	17	0.116287	Q86P04;Q9VHA1;Q9VHA2	Q86P04_DROME;Q9VHA1_DROME;Q9VHA2_DROME	RE01362p (Fragment);Spermidine synthase, isoform A;GH08387p	SpdS	Q86P04;Q9VHA1;Q9VHA2	Drosophila melanogaster	tr		2;1;1	1;1;2	uniprot-drosophila_reviewed_unreviewed_0825_2016	>tr|Q86P04|Q86P04_DROME RE01362p (Fragment) OS=Drosophila melanogaster GN=SpdS PE=2 SV=1;>tr|Q9VHA1|Q9VHA1_DROME Spermidine synthase, isoform A OS=Drosophila melanogaster GN=SpdS PE=1 SV=1;>tr|Q9VHA2|Q9VHA2_DROME GH08387p OS=Drosophila melanogaster GN=SpdS PE=1 SV=2	3	3
TRUE	Contr / Rep	Contr	Rep	18	Q9W022	3350.22	3956.15	0.239844	0.239844	18.0865	1.18086	0	3.79937e-05	6.45378e-05	17	0.0508694	Q9W022	Q9W022_DROME	CG8993	CG8993	Q9W022	Drosophila melanogaster	tr		1	1	uniprot-drosophila_reviewed_unreviewed_0825_2016	>tr|Q9W022|Q9W022_DROME CG8993 OS=Drosophila melanogaster GN=CG8993 PE=1 SV=1	2	3
TRUE	Contr / Rep	Contr	Rep	12	Q9VMQ9	168.476	82.4094	-1.03166	1.03166	-51.0854	0.489146	0	3.82798e-05	6.45378e-05	11	0.207678	Q9VMQ9	Q9VMQ9_DROME	Clot protein	cl	Q9VMQ9	Drosophila melanogaster	tr		1	1	uniprot-drosophila_reviewed_unreviewed_0825_2016	>tr|Q9VMQ9|Q9VMQ9_DROME Clot protein OS=Drosophila melanogaster GN=cl PE=1 SV=1	2	2
TRUE	Contr / Rep	Contr	Rep	6	Q967S0;Q9VRZ1	105.83	232.63	1.13629	1.13629	119.814	2.19814	0	3.7999e-05	6.45378e-05	5	0.119259	Q967S0;Q9VRZ1	Q967S0_DROME;Q9VRZ1_DROME	Amidophosphoribosyltransferase	Prat2	Q967S0;Q9VRZ1	Drosophila melanogaster	tr		1	1;2	uniprot-drosophila_reviewed_unreviewed_0825_2016	>tr|Q967S0|Q967S0_DROME Amidophosphoribosyltransferase OS=Drosophila melanogaster GN=Prat2 PE=1 SV=1;>tr|Q9VRZ1|Q9VRZ1_DROME Amidophosphoribosyltransferase OS=Drosophila melanogaster GN=Prat2 PE=1 SV=2	1	1
TRUE	Contr / Rep	Contr	Rep	24	A0A0B4LEY6;Q94518	1473.99	1051.27	-0.487593	0.487593	-28.6786	0.713214	0	4.17733e-05	6.98504e-05	23	0.0949933	A0A0B4LEY6;Q94518,Q94518	A0A0B4LEY6_DROME;NACA_DROME,NACA_DROME	Nascent polypeptide associated complex protein alpha subunit, isoform D;Nascent polypeptide-associated complex subunit alpha,Nascent polypeptide-associated complex subunit alpha	Nacalpha	A0A0B4LEY6;Q94518,Q94518	Drosophila melanogaster	tr;sp,sp		4;1,1	1;2,2	uniprot-drosophila_reviewed_unreviewed_0825_2016	>tr|A0A0B4LEY6|A0A0B4LEY6_DROME Nascent polypeptide associated complex protein alpha subunit, isoform D OS=Drosophila melanogaster GN=Nacalpha PE=4 SV=1;>sp|Q94518|NACA_DROME Nascent polypeptide-associated complex subunit alpha OS=Drosophila melanogaster GN=Nacalpha PE=1 SV=2,>sp|Q94518|NACA_DROME Nascent polypeptide-associated complex subunit alpha OS=Drosophila melanogaster GN=Nacalpha PE=1 SV=2	3	4
TRUE	Contr / Rep	Contr	Rep	6	Q7K127	500.989	1134.9	1.17972	1.17972	126.532	2.26532	0	4.26942e-05	7.08098e-05	5	0.126289	Q7K127	Q7K127_DROME	CG7997, isoform A	CG7997	Q7K127	Drosophila melanogaster	tr		1	1	uniprot-drosophila_reviewed_unreviewed_0825_2016	>tr|Q7K127|Q7K127_DROME CG7997, isoform A OS=Drosophila melanogaster GN=CG7997 PE=1 SV=1	1	1
TRUE	Contr / Rep	Contr	Rep	24	E1JIZ4;E1JIZ5;Q9U1J0;Q9VB69	664.624	449.765	-0.563367	0.563367	-32.3279	0.676721	0	4.56829e-05	7.51557e-05	23	0.157594	E1JIZ4;E1JIZ5;Q9U1J0;Q9VB69	E1JIZ4_DROME;E1JIZ5_DROME;Q9U1J0_DROME;Q9VB69_DROME	Malic enzyme	Men-b	E1JIZ4;E1JIZ5;Q9U1J0;Q9VB69	Drosophila melanogaster	tr		1;1;2;1	1	uniprot-drosophila_reviewed_unreviewed_0825_2016	>tr|E1JIZ4|E1JIZ4_DROME Malic enzyme OS=Drosophila melanogaster GN=Men-b PE=1 SV=1;>tr|E1JIZ5|E1JIZ5_DROME Malic enzyme OS=Drosophila melanogaster GN=Men-b PE=1 SV=1;>tr|Q9U1J0|Q9U1J0_DROME Malic enzyme OS=Drosophila melanogaster GN=Men-b PE=2 SV=1;>tr|Q9VB69|Q9VB69_DROME Malic enzyme OS=Drosophila melanogaster GN=Men-b PE=1 SV=1	4	4
TRUE	Contr / Rep	Contr	Rep	42	P46415	5566.87	4141.51	-0.426711	0.426711	-25.6044	0.743956	0	4.92601e-05	8.03924e-05	41	0.0785325	P46415	ADHX_DROME	Alcohol dehydrogenase class-3	Fdh	P46415	Drosophila melanogaster	sp		1	3	uniprot-drosophila_reviewed_unreviewed_0825_2016	>sp|P46415|ADHX_DROME Alcohol dehydrogenase class-3 OS=Drosophila melanogaster GN=Fdh PE=1 SV=3,>sp|P46415|ADHX_DROME Alcohol dehydrogenase class-3 OS=Drosophila melanogaster GN=Fdh PE=1 SV=3	6	7
TRUE	Contr / Rep	Contr	Rep	73	A8JNU6;Q8IGI6;Q8IQQ0;Q9VVC5	2783.37	4372.67	0.651683	0.651683	57.0999	1.571	0	5.07273e-05	8.21299e-05	72	0.106023	A8JNU6;Q8IGI6;Q8IQQ0;Q9VVC5	A8JNU6_DROME;Q8IGI6_DROME;Q8IQQ0_DROME;Q9VVC5_DROME	Neural conserved at 73EF, isoform I;RH09189p;Neural conserved at 73EF, isoform F;Neural conserved at 73EF, isoform A	Nc73EF	A8JNU6;Q8IGI6;Q8IQQ0;Q9VVC5	Drosophila melanogaster	tr		1;2;1;1	1;1;1;2	uniprot-drosophila_reviewed_unreviewed_0825_2016	>tr|A8JNU6|A8JNU6_DROME Neural conserved at 73EF, isoform I OS=Drosophila melanogaster GN=Nc73EF PE=1 SV=1;>tr|Q8IGI6|Q8IGI6_DROME RH09189p OS=Drosophila melanogaster GN=Nc73EF PE=2 SV=1;>tr|Q8IQQ0|Q8IQQ0_DROME Neural conserved at 73EF, isoform F OS=Drosophila melanogaster GN=Nc73EF PE=1 SV=1;>tr|Q9VVC5|Q9VVC5_DROME Neural conserved at 73EF, isoform A OS=Drosophila melanogaster GN=Nc73EF PE=1 SV=2	9	13
TRUE	Contr / Rep	Contr	Rep	54	P54399;X2JGP4	10573.1	8328.78	-0.34422	0.34422	-21.2266	0.787734	0	5.21424e-05	8.37563e-05	53	0.0895932	P54399,P54399;X2JGP4	PDI_DROME,PDI_DROME;X2JGP4_DROME	Protein disulfide-isomerase	Pdi	P54399,P54399;X2JGP4	Drosophila melanogaster	sp,sp;tr		2,2;3	1	uniprot-drosophila_reviewed_unreviewed_0825_2016	>sp|P54399|PDI_DROME Protein disulfide-isomerase OS=Drosophila melanogaster GN=Pdi PE=2 SV=1,>sp|P54399|PDI_DROME Protein disulfide-isomerase OS=Drosophila melanogaster GN=Pdi PE=2 SV=1;>tr|X2JGP4|X2JGP4_DROME Protein disulfide-isomerase OS=Drosophila melanogaster GN=Pdi PE=3 SV=1	8	10
TRUE	Contr / Rep	Contr	Rep	24	A4V4A5;Q9VZ23	3760.9	2812.15	-0.4194	0.4194	-25.2264	0.747736	0	5.31779e-05	8.47523e-05	23	0.0733316	A4V4A5;Q9VZ23,Q9VZ23	A4V4A5_DROME;RAN_DROME,RAN_DROME	GTP-binding nuclear protein;GTP-binding nuclear protein Ran,GTP-binding nuclear protein Ran	Ran	A4V4A5;Q9VZ23,Q9VZ23	Drosophila melanogaster	tr;sp,sp		1	1	uniprot-drosophila_reviewed_unreviewed_0825_2016	>tr|A4V4A5|A4V4A5_DROME GTP-binding nuclear protein OS=Drosophila melanogaster GN=Ran PE=1 SV=1;>sp|Q9VZ23|RAN_DROME GTP-binding nuclear protein Ran OS=Drosophila melanogaster GN=Ran PE=1 SV=1,>sp|Q9VZ23|RAN_DROME GTP-binding nuclear protein Ran OS=Drosophila melanogaster GN=Ran PE=1 SV=1	4	4
TRUE	Contr / Rep	Contr	Rep	42	D0IQI3;O61604;Q8IQZ7;Q8IQZ8	1086.37	969.743	-0.163845	0.163845	-10.7357	0.892643	0	5.57721e-05	8.75194e-05	41	0.160233	D0IQI3;O61604;Q8IQZ7;Q8IQZ8	D0IQI3_DROME;O61604_DROME;Q8IQZ7_DROME;Q8IQZ8_DROME	SD23213p;Fimbrin;FI19014p1;FI20019p1	Fim-RD;Fim;Fim;Fim	D0IQI3;O61604;Q8IQZ7;Q8IQZ8	Drosophila melanogaster	tr		2;1;1;1	1	uniprot-drosophila_reviewed_unreviewed_0825_2016	>tr|D0IQI3|D0IQI3_DROME SD23213p OS=Drosophila melanogaster GN=Fim-RD PE=2 SV=1;>tr|O61604|O61604_DROME Fimbrin OS=Drosophila melanogaster GN=Fim PE=1 SV=1;>tr|Q8IQZ7|Q8IQZ7_DROME FI19014p1 OS=Drosophila melanogaster GN=Fim PE=1 SV=1;>tr|Q8IQZ8|Q8IQZ8_DROME FI20019p1 OS=Drosophila melanogaster GN=Fim PE=1 SV=1	7	8
TRUE	Contr / Rep	Contr	Rep	18	Q8IGC5;Q8IP94;Q8MRL7;Q9VKB0	146.49	89.7794	-0.706344	0.706344	-38.7129	0.612871	0	5.53679e-05	8.75194e-05	17	0.164843	Q8IGC5;Q8IP94;Q8MRL7;Q9VKB0	Q8IGC5_DROME;Q8IP94_DROME;Q8MRL7_DROME;Q9VKB0_DROME	RH56418p;Threonyl-tRNA synthetase, isoform B;GH20022p;FI05224p	ThrRS	Q8IGC5;Q8IP94;Q8MRL7;Q9VKB0	Drosophila melanogaster	tr		2;1;2;1	1;1;1;2	uniprot-drosophila_reviewed_unreviewed_0825_2016	>tr|Q8IGC5|Q8IGC5_DROME RH56418p OS=Drosophila melanogaster GN=ThrRS PE=2 SV=1;>tr|Q8IP94|Q8IP94_DROME Threonyl-tRNA synthetase, isoform B OS=Drosophila melanogaster GN=ThrRS PE=1 SV=1;>tr|Q8MRL7|Q8MRL7_DROME GH20022p OS=Drosophila melanogaster GN=ThrRS PE=2 SV=1;>tr|Q9VKB0|Q9VKB0_DROME FI05224p OS=Drosophila melanogaster GN=ThrRS PE=1 SV=2	3	3
TRUE	Contr / Rep	Contr	Rep	6	A1Z7H7;Q8MSK6	89.2072	172.825	0.954076	0.954076	93.7339	1.93734	0	5.71371e-05	8.89769e-05	5	0.10365	A1Z7H7;Q8MSK6	A1Z7H7_DROME;Q8MSK6_DROME	CG8586, isoform A;GH02222p	CG8586-RA;CG8586	A1Z7H7;Q8MSK6	Drosophila melanogaster	tr		1;2	1	uniprot-drosophila_reviewed_unreviewed_0825_2016	>tr|A1Z7H7|A1Z7H7_DROME CG8586, isoform A OS=Drosophila melanogaster GN=CG8586-RA PE=1 SV=1;>tr|Q8MSK6|Q8MSK6_DROME GH02222p OS=Drosophila melanogaster GN=CG8586 PE=2 SV=1	1	1
TRUE	Contr / Rep	Contr	Rep	6	P17704	432.619	219.727	-0.977387	0.977387	-49.2101	0.507899	0	5.94596e-05	9.18921e-05	5	0.106071	P17704	RS17_DROME	40S ribosomal protein S17	RpS17	P17704	Drosophila melanogaster	sp		1	2	uniprot-drosophila_reviewed_unreviewed_0825_2016	>sp|P17704|RS17_DROME 40S ribosomal protein S17 OS=Drosophila melanogaster GN=RpS17 PE=1 SV=2,>sp|P17704|RS17_DROME 40S ribosomal protein S17 OS=Drosophila melanogaster GN=RpS17 PE=1 SV=2	1	1
TRUE	Contr / Rep	Contr	Rep	78	Q95U46;Q9VVU1	30822.5	36780.7	0.254965	0.254965	19.3306	1.19331	0	6.2119e-05	9.52803e-05	77	0.0924591	Q95U46;Q9VVU1	Q95U46_DROME;Q9VVU1_DROME	GH07925p;CG3902	CG3902;CG3902-RA	Q95U46;Q9VVU1	Drosophila melanogaster	tr		2;1	1	uniprot-drosophila_reviewed_unreviewed_0825_2016	>tr|Q95U46|Q95U46_DROME GH07925p OS=Drosophila melanogaster GN=CG3902 PE=2 SV=1;>tr|Q9VVU1|Q9VVU1_DROME CG3902 OS=Drosophila melanogaster GN=CG3902-RA PE=1 SV=1	10	13
TRUE	Contr / Rep	Contr	Rep	222	A4UZZ4;Q9XTL9	191947	203475	0.0841436	0.0841436	6.00583	1.06006	0	7.32144e-05	0.000110635	221	0.0662315	A4UZZ4;Q9XTL9,Q9XTL9	A4UZZ4_DROME;PYG_DROME,PYG_DROME	Alpha-1,4 glucan phosphorylase;Glycogen phosphorylase,Glycogen phosphorylase	GlyP	A4UZZ4;Q9XTL9,Q9XTL9	Drosophila melanogaster	tr;sp,sp		1;2,2	1;2,2	uniprot-drosophila_reviewed_unreviewed_0825_2016	>tr|A4UZZ4|A4UZZ4_DROME Alpha-1,4 glucan phosphorylase OS=Drosophila melanogaster GN=GlyP PE=1 SV=1;>sp|Q9XTL9|PYG_DROME Glycogen phosphorylase OS=Drosophila melanogaster GN=GlyP PE=2 SV=2,>sp|Q9XTL9|PYG_DROME Glycogen phosphorylase OS=Drosophila melanogaster GN=GlyP PE=2 SV=2	31	40
TRUE	Contr / Rep	Contr	Rep	24	Q6NNU7;Q9VIC9	165.521	361.922	1.12866	1.12866	118.656	2.18656	0	7.31329e-05	0.000110635	23	0.244086	Q6NNU7;Q9VIC9	Q6NNU7_DROME;Q9VIC9_DROME	10-formyltetrahydrofolate dehydrogenase	CG8665;CG8665-RA	Q6NNU7;Q9VIC9	Drosophila melanogaster	tr		2;1	1;3	uniprot-drosophila_reviewed_unreviewed_0825_2016	>tr|Q6NNU7|Q6NNU7_DROME 10-formyltetrahydrofolate dehydrogenase OS=Drosophila melanogaster GN=CG8665 PE=2 SV=1;>tr|Q9VIC9|Q9VIC9_DROME 10-formyltetrahydrofolate dehydrogenase OS=Drosophila melanogaster GN=CG8665-RA PE=1 SV=3	4	4
TRUE	Contr / Rep	Contr	Rep	42	Q7K5K3	16211.3	19536.3	0.269163	0.269163	20.5108	1.20511	0	7.41755e-05	0.000111194	41	0.0927997	Q7K5K3	Q7K5K3_DROME	GH08474p	CG11876	Q7K5K3	Drosophila melanogaster	tr		1	1	uniprot-drosophila_reviewed_unreviewed_0825_2016	>tr|Q7K5K3|Q7K5K3_DROME GH08474p OS=Drosophila melanogaster GN=CG11876 PE=1 SV=1	6	7
TRUE	Contr / Rep	Contr	Rep	6	P06606	62.3587	9.2943	-2.74617	2.74617	-85.0954	0.149046	0	7.52192e-05	0.000111194	5	0.320948	P06606	TBA4_DROME	Tubulin alpha-4 chain	alphaTub67C	P06606	Drosophila melanogaster	sp		3	1	uniprot-drosophila_reviewed_unreviewed_0825_2016	>sp|P06606|TBA4_DROME Tubulin alpha-4 chain OS=Drosophila melanogaster GN=alphaTub67C PE=3 SV=1,>sp|P06606|TBA4_DROME Tubulin alpha-4 chain OS=Drosophila melanogaster GN=alphaTub67C PE=3 SV=1	1	1
TRUE	Contr / Rep	Contr	Rep	6	Q9W2X6	839.364	621.981	-0.432426	0.432426	-25.8985	0.741015	0	7.50817e-05	0.000111194	5	0.0482314	Q9W2X6	Q9W2X6_DROME	ATP synthase, delta subunit, isoform A	ATPsyndelta	Q9W2X6	Drosophila melanogaster	tr		1	1	uniprot-drosophila_reviewed_unreviewed_0825_2016	>tr|Q9W2X6|Q9W2X6_DROME ATP synthase, delta subunit, isoform A OS=Drosophila melanogaster GN=ATPsyndelta PE=1 SV=1	1	1
TRUE	Contr / Rep	Contr	Rep	52	C8VV33;C9QP42;Q02748	10715	7812.1	-0.455843	0.455843	-27.0916	0.729084	0	8.01868e-05	0.000117684	51	0.104657	C8VV33;C9QP42;Q02748,Q02748	C8VV33_DROME;C9QP42_DROME;IF4A_DROME,IF4A_DROME	AT04852p;Eukaryotic initiation factor 4a, isoform E;Eukaryotic initiation factor 4A,Eukaryotic initiation factor 4A	eIF-4a-RD;eIF-4a;eIF-4a,eIF-4a	C8VV33;C9QP42;Q02748,Q02748	Drosophila melanogaster	tr;tr;sp,sp		2;1;1,1	1;1;3,3	uniprot-drosophila_reviewed_unreviewed_0825_2016	>tr|C8VV33|C8VV33_DROME AT04852p OS=Drosophila melanogaster GN=eIF-4a-RD PE=2 SV=1;>tr|C9QP42|C9QP42_DROME Eukaryotic initiation factor 4a, isoform E OS=Drosophila melanogaster GN=eIF-4a PE=1 SV=1;>sp|Q02748|IF4A_DROME Eukaryotic initiation factor 4A OS=Drosophila melanogaster GN=eIF-4a PE=1 SV=3,>sp|Q02748|IF4A_DROME Eukaryotic initiation factor 4A OS=Drosophila melanogaster GN=eIF-4a PE=1 SV=3	8	9
TRUE	Contr / Rep	Contr	Rep	43	M9PIS3;P41572	2885.72	3480.84	0.270506	0.270506	20.6231	1.20623	0	8.48742e-05	0.000123674	42	0.237627	M9PIS3;P41572,P41572	M9PIS3_DROME;6PGD_DROME,6PGD_DROME	6-phosphogluconate dehydrogenase, decarboxylating;6-phosphogluconate dehydrogenase, decarboxylating,6-phosphogluconate dehydrogenase, decarboxylating	Pgd	M9PIS3;P41572,P41572	Drosophila melanogaster	tr;sp,sp		3;2,2	1	uniprot-drosophila_reviewed_unreviewed_0825_2016	>tr|M9PIS3|M9PIS3_DROME 6-phosphogluconate dehydrogenase, decarboxylating OS=Drosophila melanogaster GN=Pgd PE=3 SV=1;>sp|P41572|6PGD_DROME 6-phosphogluconate dehydrogenase, decarboxylating OS=Drosophila melanogaster GN=Pgd PE=2 SV=1,>sp|P41572|6PGD_DROME 6-phosphogluconate dehydrogenase, decarboxylating OS=Drosophila melanogaster GN=Pgd PE=2 SV=1	7	8
TRUE	Contr / Rep	Contr	Rep	24	M9PD75;Q94920	1584.67	1314.83	-0.269312	0.269312	-17.0285	0.829715	0	9.09462e-05	0.000131582	23	0.149274	M9PD75;Q94920,Q94920	M9PD75_DROME;VDAC_DROME,VDAC_DROME	Porin, isoform D;Voltage-dependent anion-selective channel,Voltage-dependent anion-selective channel	porin	M9PD75;Q94920,Q94920	Drosophila melanogaster	tr;sp,sp		4;1,1	1;3,3	uniprot-drosophila_reviewed_unreviewed_0825_2016	>tr|M9PD75|M9PD75_DROME Porin, isoform D OS=Drosophila melanogaster GN=porin PE=4 SV=1;>sp|Q94920|VDAC_DROME Voltage-dependent anion-selective channel OS=Drosophila melanogaster GN=porin PE=1 SV=3,>sp|Q94920|VDAC_DROME Voltage-dependent anion-selective channel OS=Drosophila melanogaster GN=porin PE=1 SV=3	5	5
TRUE	Contr / Rep	Contr	Rep	36	Q8MYV0;Q9VW68	6556.07	5298.26	-0.307312	0.307312	-19.1854	0.808146	0	9.6892e-05	0.000139197	35	0.0927368	Q8MYV0;Q9VW68	Q8MYV0_DROME;Q9VW68_DROME	RH42429p;CG7433, isoform A	CG7433	Q8MYV0;Q9VW68	Drosophila melanogaster	tr		2;1	1	uniprot-drosophila_reviewed_unreviewed_0825_2016	>tr|Q8MYV0|Q8MYV0_DROME RH42429p OS=Drosophila melanogaster GN=CG7433 PE=2 SV=1;>tr|Q9VW68|Q9VW68_DROME CG7433, isoform A OS=Drosophila melanogaster GN=CG7433 PE=1 SV=1	6	6
TRUE	Contr / Rep	Contr	Rep	12	P48588	2808.08	1683.69	-0.737958	0.737958	-40.0413	0.599587	0	9.98117e-05	0.000142389	11	0.223214	P48588	RS25_DROME	40S ribosomal protein S25	RpS25	P48588	Drosophila melanogaster	sp		1	3	uniprot-drosophila_reviewed_unreviewed_0825_2016	>sp|P48588|RS25_DROME 40S ribosomal protein S25 OS=Drosophila melanogaster GN=RpS25 PE=1 SV=3,>sp|P48588|RS25_DROME 40S ribosomal protein S25 OS=Drosophila melanogaster GN=RpS25 PE=1 SV=3	2	2
TRUE	Contr / Rep	Contr	Rep	24	C6SV44;Q95029	3787.96	3249.13	-0.221364	0.221364	-14.2246	0.857754	0	0.000111819	0.00015841	23	0.154687	C6SV44;Q95029,Q95029	C6SV44_DROME;CATL_DROME,CATL_DROME	RE21773p (Fragment);Cathepsin L,Cathepsin L	Cp1-RC;Cp1,Cp1	C6SV44;Q95029,Q95029	Drosophila melanogaster	tr;sp,sp		2	1;2,2	uniprot-drosophila_reviewed_unreviewed_0825_2016	>tr|C6SV44|C6SV44_DROME RE21773p (Fragment) OS=Drosophila melanogaster GN=Cp1-RC PE=2 SV=1;>sp|Q95029|CATL_DROME Cathepsin L OS=Drosophila melanogaster GN=Cp1 PE=2 SV=2,>sp|Q95029|CATL_DROME Cathepsin L OS=Drosophila melanogaster GN=Cp1 PE=2 SV=2	4	4
TRUE	Contr / Rep	Contr	Rep	6	P54397	41.5283	12.0502	-1.78504	1.78504	-70.9833	0.290167	0	0.0001172	0.000164888	5	0.22078	P54397	FKB39_DROME	39 kDa FK506-binding nuclear protein	FK506-bp1	P54397	Drosophila melanogaster	sp		1	2	uniprot-drosophila_reviewed_unreviewed_0825_2016	>sp|P54397|FKB39_DROME 39 kDa FK506-binding nuclear protein OS=Drosophila melanogaster GN=FK506-bp1 PE=1 SV=2,>sp|P54397|FKB39_DROME 39 kDa FK506-binding nuclear protein OS=Drosophila melanogaster GN=FK506-bp1 PE=1 SV=2	1	1
TRUE	Contr / Rep	Contr	Rep	6	A0A0C4DHE8;I7CP40;Q8IH91;Q8IHD2;Q9VH69	2449.55	833.75	-1.55483	1.55483	-65.9631	0.340369	0	0.000146363	0.000204507	5	0.188806	A0A0C4DHE8;I7CP40;Q8IH91;Q8IHD2;Q9VH69,Q9VH69	A0A0C4DHE8_DROME;I7CP40_DROME;Q8IH91_DROME;Q8IHD2_DROME;RS29_DROME,RS29_DROME	Ribosomal protein S29, isoform B;LP18839p1 (Fragment);AT28563p;AT13329p (Fragment);40S ribosomal protein S29,40S ribosomal protein S29	RpS29;RpS29-RA;RpS29;RpS29;RpS29,RpS29	A0A0C4DHE8;I7CP40;Q8IH91;Q8IHD2;Q9VH69,Q9VH69	Drosophila melanogaster	tr;tr;tr;tr;sp,sp		1;2;2;2;1,1	1;1;2;1;1,1	uniprot-drosophila_reviewed_unreviewed_0825_2016	>tr|A0A0C4DHE8|A0A0C4DHE8_DROME Ribosomal protein S29, isoform B OS=Drosophila melanogaster GN=RpS29 PE=1 SV=1;>tr|I7CP40|I7CP40_DROME LP18839p1 (Fragment) OS=Drosophila melanogaster GN=RpS29-RA PE=2 SV=1;>tr|Q8IH91|Q8IH91_DROME AT28563p OS=Drosophila melanogaster GN=RpS29 PE=2 SV=2;>tr|Q8IHD2|Q8IHD2_DROME AT13329p (Fragment) OS=Drosophila melanogaster GN=RpS29 PE=2 SV=1;>sp|Q9VH69|RS29_DROME 40S…	1	1
TRUE	Contr / Rep	Contr	Rep	12	A9UNE3;Q8IN51	148.067	269.214	0.8625	0.8625	81.8187	1.81819	0	0.000152701	0.000211911	11	0.171797	A9UNE3;Q8IN51	A9UNE3_DROME;Q8IN51_DROME	TA01584p;FI17609p1	CG31205;CG31205-RB	A9UNE3;Q8IN51	Drosophila melanogaster	tr		2;1	1;2	uniprot-drosophila_reviewed_unreviewed_0825_2016	>tr|A9UNE3|A9UNE3_DROME TA01584p OS=Drosophila melanogaster GN=CG31205 PE=2 SV=1;>tr|Q8IN51|Q8IN51_DROME FI17609p1 OS=Drosophila melanogaster GN=CG31205-RB PE=1 SV=2	1	2
TRUE	Contr / Rep	Contr	Rep	6	M9PIM0;O61231	1322.47	544.708	-1.27968	1.27968	-58.8112	0.411888	0	0.000155678	0.000214583	5	0.160148	M9PIM0;O61231,O61231	M9PIM0_DROME;RL10_DROME,RL10_DROME	Ribosomal protein L10, isoform E;60S ribosomal protein L10,60S ribosomal protein L10	RpL10	M9PIM0;O61231,O61231	Drosophila melanogaster	tr;sp,sp		4;1,1	1	uniprot-drosophila_reviewed_unreviewed_0825_2016	>tr|M9PIM0|M9PIM0_DROME Ribosomal protein L10, isoform E OS=Drosophila melanogaster GN=RpL10 PE=4 SV=1;>sp|O61231|RL10_DROME 60S ribosomal protein L10 OS=Drosophila melanogaster GN=RpL10 PE=1 SV=1,>sp|O61231|RL10_DROME 60S ribosomal protein L10 OS=Drosophila melanogaster GN=RpL10 PE=1 SV=1	1	1
TRUE	Contr / Rep	Contr	Rep	12	Q8MS29;Q9VQQ6;X2J8I7	18.225	11.1153	-0.713373	0.713373	-39.0108	0.609892	0	0.000165964	0.000227225	11	0.133354	Q8MS29;Q9VQQ6;X2J8I7	Q8MS29_DROME;Q9VQQ6_DROME;X2J8I7_DROME	RE32163p;FI18122p1;Sorting nexin 1, isoform B	Snx1	Q8MS29;Q9VQQ6;X2J8I7	Drosophila melanogaster	tr		2;1;1	1	uniprot-drosophila_reviewed_unreviewed_0825_2016	>tr|Q8MS29|Q8MS29_DROME RE32163p OS=Drosophila melanogaster GN=Snx1 PE=2 SV=1;>tr|Q9VQQ6|Q9VQQ6_DROME FI18122p1 OS=Drosophila melanogaster GN=Snx1 PE=1 SV=1;>tr|X2J8I7|X2J8I7_DROME Sorting nexin 1, isoform B OS=Drosophila melanogaster GN=Snx1 PE=1 SV=1	2	2
TRUE	Contr / Rep	Contr	Rep	6	M9PG67;Q9VPH6	108.471	237.081	1.12807	1.12807	118.567	2.18567	0	0.000170575	0.000231981	5	0.139434	M9PG67;Q9VPH6	M9PG67_DROME;Q9VPH6_DROME	CG5618, isoform D;CG5618, isoform A	CG5618	M9PG67;Q9VPH6	Drosophila melanogaster	tr		1	1	uniprot-drosophila_reviewed_unreviewed_0825_2016	>tr|M9PG67|M9PG67_DROME CG5618, isoform D OS=Drosophila melanogaster GN=CG5618 PE=1 SV=1;>tr|Q9VPH6|Q9VPH6_DROME CG5618, isoform A OS=Drosophila melanogaster GN=CG5618 PE=1 SV=1	1	1
TRUE	Contr / Rep	Contr	Rep	12	Q9VM12	2009.51	2478.08	0.302382	0.302382	23.3178	1.23318	0	0.000176573	0.000238549	11	0.0702151	Q9VM12	Q9VM12_DROME	CG5958	CG5958-RA	Q9VM12	Drosophila melanogaster	tr		1	1	uniprot-drosophila_reviewed_unreviewed_0825_2016	>tr|Q9VM12|Q9VM12_DROME CG5958 OS=Drosophila melanogaster GN=CG5958-RA PE=1 SV=1	3	3
TRUE	Contr / Rep	Contr	Rep	12	A0A0B4LIJ0;P48601	183.57	55.4022	-1.72831	1.72831	-69.8196	0.301804	0	0.000186626	0.000250471	11	0.236313	A0A0B4LIJ0;P48601,P48601	A0A0B4LIJ0_DROME;PRS4_DROME,PRS4_DROME	Regulatory particle triple-A ATPase 2, isoform B;26S protease regulatory subunit 4,26S protease regulatory subunit 4	Rpt2	A0A0B4LIJ0;P48601,P48601	Drosophila melanogaster	tr;sp,sp		3;1,1	1;2,2	uniprot-drosophila_reviewed_unreviewed_0825_2016	>tr|A0A0B4LIJ0|A0A0B4LIJ0_DROME Regulatory particle triple-A ATPase 2, isoform B OS=Drosophila melanogaster GN=Rpt2 PE=3 SV=1;>sp|P48601|PRS4_DROME 26S protease regulatory subunit 4 OS=Drosophila melanogaster GN=Rpt2 PE=1 SV=2,>sp|P48601|PRS4_DROME 26S protease regulatory subunit 4 OS=Drosophila melanogaster GN=Rpt2 PE=1 SV=2	2	2
TRUE	Contr / Rep	Contr	Rep	6	Q9VTN9	60.6745	191.257	1.65635	1.65635	215.218	3.15218	0	0.000189081	0.000252107	5	0.206513	Q9VTN9	Q9VTN9_DROME	FI03238p	CG10361-RA	Q9VTN9	Drosophila melanogaster	tr		1	2	uniprot-drosophila_reviewed_unreviewed_0825_2016	>tr|Q9VTN9|Q9VTN9_DROME FI03238p OS=Drosophila melanogaster GN=CG10361-RA PE=1 SV=2	1	1
TRUE	Contr / Rep	Contr	Rep	6	B4F5T6;B4F5T7;B4F5T8;B4F5U0;B4F5U1;Q9NF33;Q9W5B4	1189.92	2038.03	0.776306	0.776306	71.2739	1.71274	0	0.000192077	0.00025444	5	0.0982888	B4F5T6;B4F5T7;B4F5T8;B4F5U0;B4F5U1;Q9NF33;Q9W5B4	B4F5T6_DROME;B4F5T7_DROME;B4F5T8_DROME;B4F5U0_DROME;B4F5U1_DROME;Q9NF33_DROME;Q9W5B4_DROME	CG14629-PA (Fragment);CG14629-PA (Fragment);CG14629-PA (Fragment);CG14629-PA (Fragment);CG14629-PA (Fragment);EG:103E12.2 protein;GH18858p	CG14629;CG14629;CG14629;CG14629;CG14629;EG:103E12.2;EG:103E12.2	B4F5T6;B4F5T7;B4F5T8;B4F5U0;B4F5U1;Q9NF33;Q9W5B4	Drosophila melanogaster	tr		4;4;4;4;4;4;1	1	uniprot-drosophila_reviewed_unreviewed_0825_2016	>tr|B4F5T6|B4F5T6_DROME CG14629-PA (Fragment) OS=Drosophila melanogaster GN=CG14629 PE=4 SV=1;>tr|B4F5T7|B4F5T7_DROME CG14629-PA (Fragment) OS=Drosophila melanogaster GN=CG14629 PE=4 SV=1;>tr|B4F5T8|B4F5T8_DROME CG14629-PA (Fragment) OS=Drosophila melanogaster GN=CG14629 PE=4 SV=1;>tr|B4F5U0|B4F5U0_DROME CG14629-PA (Fragment) OS=Drosophila melanogaster GN=CG14629 PE=4 SV=1;>tr|B4F5U1|B4F5U1_DROME…	1	1
TRUE	Contr / Rep	Contr	Rep	30	Q9VAY2	8172.13	6179.49	-0.403223	0.403223	-24.3833	0.756167	0	0.000197495	0.000256618	29	0.194675	Q9VAY2	Q9VAY2_DROME	Glycoprotein 93	Gp93	Q9VAY2	Drosophila melanogaster	tr		1	1	uniprot-drosophila_reviewed_unreviewed_0825_2016	>tr|Q9VAY2|Q9VAY2_DROME Glycoprotein 93 OS=Drosophila melanogaster GN=Gp93 PE=1 SV=1	4	5
TRUE	Contr / Rep	Contr	Rep	6	A0APE4;A0APE6;Q7JXC4	405.635	179.386	-1.17711	1.17711	-55.7764	0.442236	0	0.000195201	0.000256618	5	0.150504	A0APE4;A0APE6;Q7JXC4	A0APE4_DROME;A0APE6_DROME;Q7JXC4_DROME	CG6459 protein	CG6459;CG6459;P32	A0APE4;A0APE6;Q7JXC4	Drosophila melanogaster	tr		4;4;1	1	uniprot-drosophila_reviewed_unreviewed_0825_2016	>tr|A0APE4|A0APE4_DROME CG6459 protein OS=Drosophila melanogaster GN=CG6459 PE=4 SV=1;>tr|A0APE6|A0APE6_DROME CG6459 protein OS=Drosophila melanogaster GN=CG6459 PE=4 SV=1;>tr|Q7JXC4|Q7JXC4_DROME CG6459 protein OS=Drosophila melanogaster GN=P32 PE=1 SV=1	1	1
TRUE	Contr / Rep	Contr	Rep	12	A1A6X4;O97118;Q0ZHI2;Q9W0A8	2306.86	1645.1	-0.48775	0.48775	-28.6864	0.713136	0	0.000197286	0.000256618	11	0.104184	A1A6X4;O97118;Q0ZHI2;Q9W0A8	A1A6X4_DROME;O97118_DROME;Q0ZHI2_DROME;Q9W0A8_DROME	IP17216p (Fragment);Ribosomal protein L23a (Fragment);L23A ribosomal protein natural variant;FI01658p	RpL23a;RpL23A;RpL23A;RpL23A	A1A6X4;O97118;Q0ZHI2;Q9W0A8	Drosophila melanogaster	tr		2;2;2;1	1	uniprot-drosophila_reviewed_unreviewed_0825_2016	>tr|A1A6X4|A1A6X4_DROME IP17216p (Fragment) OS=Drosophila melanogaster GN=RpL23a PE=2 SV=1;>tr|O97118|O97118_DROME Ribosomal protein L23a (Fragment) OS=Drosophila melanogaster GN=RpL23A PE=2 SV=1;>tr|Q0ZHI2|Q0ZHI2_DROME L23A ribosomal protein natural variant OS=Drosophila melanogaster GN=RpL23A PE=2 SV=1;>tr|Q9W0A8|Q9W0A8_DROME FI01658p OS=Drosophila melanogaster GN=RpL23A PE=1 SV=1	2	2
TRUE	Contr / Rep	Contr	Rep	18	C6SUV6;C7LA69;O16797	105.92	36.8232	-1.52429	1.52429	-65.2349	0.347651	0	0.000214485	0.000275188	17	0.252699	C6SUV6;C7LA69;O16797,O16797	C6SUV6_DROME;C7LA69_DROME;RL3_DROME,RL3_DROME	LP14077p (Fragment);RE52161p;60S ribosomal protein L3,60S ribosomal protein L3	RpL3-RA;RpL3-RB;RpL3,RpL3	C6SUV6;C7LA69;O16797,O16797	Drosophila melanogaster	tr;tr;sp,sp		2;2;1,1	1;1;3,3	uniprot-drosophila_reviewed_unreviewed_0825_2016	>tr|C6SUV6|C6SUV6_DROME LP14077p (Fragment) OS=Drosophila melanogaster GN=RpL3-RA PE=2 SV=1;>tr|C7LA69|C7LA69_DROME RE52161p OS=Drosophila melanogaster GN=RpL3-RB PE=2 SV=1;>sp|O16797|RL3_DROME 60S ribosomal protein L3 OS=Drosophila melanogaster GN=RpL3 PE=1 SV=3,>sp|O16797|RL3_DROME 60S ribosomal protein L3 OS=Drosophila melanogaster GN=RpL3 PE=1 SV=3	3	5
TRUE	Contr / Rep	Contr	Rep	48	P45594	31733.8	38154	0.265813	0.265813	20.2314	1.20231	0	0.000213413	0.000275188	47	0.133974	P45594	CADF_DROME	Cofilin/actin-depolymerizing factor homolog	tsr	P45594	Drosophila melanogaster	sp		1	1	uniprot-drosophila_reviewed_unreviewed_0825_2016	>sp|P45594|CADF_DROME Cofilin/actin-depolymerizing factor homolog OS=Drosophila melanogaster GN=tsr PE=1 SV=1,>sp|P45594|CADF_DROME Cofilin/actin-depolymerizing factor homolog OS=Drosophila melanogaster GN=tsr PE=1 SV=1	6	8
TRUE	Contr / Rep	Contr	Rep	24	A0A0B4LG52;Q9W237	4281.86	2402.36	-0.833787	0.833787	-43.8945	0.561055	0	0.000217558	0.00027614	23	0.222309	A0A0B4LG52;Q9W237,Q9W237	A0A0B4LG52_DROME;RS16_DROME,RS16_DROME	Ribosomal protein S16, isoform B;40S ribosomal protein S16,40S ribosomal protein S16	RpS16	A0A0B4LG52;Q9W237,Q9W237	Drosophila melanogaster	tr;sp,sp		3;1,1	1	uniprot-drosophila_reviewed_unreviewed_0825_2016	>tr|A0A0B4LG52|A0A0B4LG52_DROME Ribosomal protein S16, isoform B OS=Drosophila melanogaster GN=RpS16 PE=3 SV=1;>sp|Q9W237|RS16_DROME 40S ribosomal protein S16 OS=Drosophila melanogaster GN=RpS16 PE=1 SV=1,>sp|Q9W237|RS16_DROME 40S ribosomal protein S16 OS=Drosophila melanogaster GN=RpS16 PE=1 SV=1	4	4
TRUE	Contr / Rep	Contr	Rep	18	Q9VZ64	197.927	271.694	0.457009	0.457009	37.2693	1.37269	0	0.000217934	0.00027614	17	0.175024	Q9VZ64	6PGL_DROME	Probable 6-phosphogluconolactonase	CG17333	Q9VZ64	Drosophila melanogaster	sp		2	1	uniprot-drosophila_reviewed_unreviewed_0825_2016	>sp|Q9VZ64|6PGL_DROME Probable 6-phosphogluconolactonase OS=Drosophila melanogaster GN=CG17333 PE=2 SV=1,>sp|Q9VZ64|6PGL_DROME Probable 6-phosphogluconolactonase OS=Drosophila melanogaster GN=CG17333 PE=2 SV=1	3	3
TRUE	Contr / Rep	Contr	Rep	6	M9PG22;P61209;P61210	529.65	268.002	-0.982795	0.982795	-49.4002	0.505998	0	0.000220852	0.00027811	5	0.128247	M9PG22;P61209,P61209;P61210	M9PG22_DROME;ARF1_DROME,ARF1_DROME;ARF1_LOCMI	ADP ribosylation factor at 79F, isoform J;ADP-ribosylation factor 1,ADP-ribosylation factor 1;ADP-ribosylation factor 1	Arf79F;Arf79F,Arf79F;ARF1	M9PG22;P61209,P61209;P61210	Drosophila melanogaster;Drosophila melanogaster,Drosophila melanogaster;Locusta migratoria	tr;sp,sp;sp		3;2,2;2	1;2,2;2	uniprot-drosophila_reviewed_unreviewed_0825_2016	>tr|M9PG22|M9PG22_DROME ADP ribosylation factor at 79F, isoform J OS=Drosophila melanogaster GN=Arf79F PE=3 SV=1;>sp|P61209|ARF1_DROME ADP-ribosylation factor 1 OS=Drosophila melanogaster GN=Arf79F PE=2 SV=2,>sp|P61209|ARF1_DROME ADP-ribosylation factor 1 OS=Drosophila melanogaster GN=Arf79F PE=2 SV=2;>sp|P61210|ARF1_LOCMI ADP-ribosylation factor 1 OS=Locusta migratoria GN=ARF1 PE=2 SV=2	1	1
TRUE	Contr / Rep	Contr	Rep	132	A8JNP1;P48610	496450	470119	-0.0786221	0.0786221	-5.30384	0.946962	0	0.000228405	0.000285857	131	0.0680567	A8JNP1;P48610,P48610	A8JNP1_DROME;KARG_DROME,KARG_DROME	Arginine kinase, isoform G;Arginine kinase,Arginine kinase	Argk	A8JNP1;P48610,P48610	Drosophila melanogaster	tr;sp,sp		1;2,2	2	uniprot-drosophila_reviewed_unreviewed_0825_2016	>tr|A8JNP1|A8JNP1_DROME Arginine kinase, isoform G OS=Drosophila melanogaster GN=Argk PE=1 SV=2;>sp|P48610|KARG_DROME Arginine kinase OS=Drosophila melanogaster GN=Argk PE=2 SV=2,>sp|P48610|KARG_DROME Arginine kinase OS=Drosophila melanogaster GN=Argk PE=2 SV=2	12	25
TRUE	Contr / Rep	Contr	Rep	12	O97102	1145.14	652.51	-0.81145	0.81145	-43.0191	0.569809	0	0.000237809	0.000295811	11	0.170871	O97102	O97102_DROME	Small ubiquitin-related modifier	smt3	O97102	Drosophila melanogaster	tr		1	1	uniprot-drosophila_reviewed_unreviewed_0825_2016	>tr|O97102|O97102_DROME Small ubiquitin-related modifier OS=Drosophila melanogaster GN=smt3 PE=1 SV=1	2	2
TRUE	Contr / Rep	Contr	Rep	21	A0A0B4KI38;B3P538;B4I029;B4JRX2;B4K8A4;B4LWZ8;B4NG41;B4PNE2;B4QSM8;Q29BB3;Q9V9X4	323.008	91.566	-1.81868	1.81868	-71.6521	0.283479	0	0.000242887	0.000300286	20	0.252776	A0A0B4KI38;B3P538;B4I029;B4JRX2;B4K8A4;B4LWZ8;B4NG41;B4PNE2;B4QSM8;Q29BB3;Q9V9X4,Q9V9X4	A0A0B4KI38_DROME;MTNA_DROER;MTNA_DROSE;MTNA_DROGR;MTNA_DROMO;MTNA_DROVI;MTNA_DROWI;MTNA_DROYA;MTNA_DROSI;MTNA_DROPS;MTNA_DROME,MTNA_DROME	Methylthioribose-1-phosphate isomerase	CG11334;GG11866;GM12085;GH21593;GI10562;GJ22917;GK22419;GE23315;GD16414;GA10928;CG11334,CG11334	A0A0B4KI38;B3P538;B4I029;B4JRX2;B4K8A4;B4LWZ8;B4NG41;B4PNE2;B4QSM8;Q29BB3;Q9V9X4,Q9V9X4	Drosophila melanogaster;Drosophila erecta;Drosophila sechellia;Drosophila grimshawi;Drosophila mojavensis;Drosophila virilis;Drosophila willistoni;Drosophila yakuba;Drosophila simulans;Drosophila pseudoobscura pseudoobscura;Drosophila melanogaster,Drosophila melanogaster	tr;sp;sp;sp;sp;sp;sp;sp;sp;sp;sp,sp		3;3;3;3;3;3;3;3;3;3;2,2	1	uniprot-drosophila_reviewed_unreviewed_0825_2016	>tr|A0A0B4KI38|A0A0B4KI38_DROME Methylthioribose-1-phosphate isomerase OS=Drosophila melanogaster GN=CG11334 PE=3 SV=1;>sp|B3P538|MTNA_DROER Methylthioribose-1-phosphate isomerase OS=Drosophila erecta GN=GG11866 PE=3 SV=1;>sp|B4I029|MTNA_DROSE Methylthioribose-1-phosphate isomerase OS=Drosophila sechellia GN=GM12085 PE=3 SV=1;>sp|B4JRX2|MTNA_DROGR Methylthioribose-1-phosphate isomerase OS=Drosoph…	3	4
TRUE	Contr / Rep	Contr	Rep	71	F0JAN1;Q9I7S8	15232.9	20534.4	0.430856	0.430856	34.8033	1.34803	0	0.00024435	0.000300286	70	0.0792562	F0JAN1;Q9I7S8,Q9I7S8	F0JAN1_DROME;PUR6_DROME,PUR6_DROME	Ade5, isoform B;Multifunctional protein ADE2,Multifunctional protein ADE2	ade5	F0JAN1;Q9I7S8,Q9I7S8	Drosophila melanogaster	tr;sp,sp		1;2,2	1;2,2	uniprot-drosophila_reviewed_unreviewed_0825_2016	>tr|F0JAN1|F0JAN1_DROME Ade5, isoform B OS=Drosophila melanogaster GN=ade5 PE=1 SV=1;>sp|Q9I7S8|PUR6_DROME Multifunctional protein ADE2 OS=Drosophila melanogaster GN=ade5 PE=2 SV=2,>sp|Q9I7S8|PUR6_DROME Multifunctional protein ADE2 OS=Drosophila melanogaster GN=ade5 PE=2 SV=2	8	14
TRUE	Contr / Rep	Contr	Rep	12	C9QP52;Q7KUT8;Q8IQV1;Q961A8;Q9VW48	1058.58	1226.13	0.21198	0.21198	15.8277	1.15828	0	0.000247347	0.000302149	11	0.0557891	C9QP52;Q7KUT8;Q8IQV1;Q961A8;Q9VW48	C9QP52_DROME;Q7KUT8_DROME;Q8IQV1_DROME;Q961A8_DROME;Q9VW48_DROME	RE15281p (Fragment);PAPS synthetase, isoform E;PAPS synthetase, isoform D;LD25351p;Bifunctional ATP sulfurylase/APS kinase	Papss-RD;Papss;Papss;Papss;Papss	C9QP52;Q7KUT8;Q8IQV1;Q961A8;Q9VW48	Drosophila melanogaster	tr		2;1;1;1;2	1;1;1;1;3	uniprot-drosophila_reviewed_unreviewed_0825_2016	>tr|C9QP52|C9QP52_DROME RE15281p (Fragment) OS=Drosophila melanogaster GN=Papss-RD PE=2 SV=1;>tr|Q7KUT8|Q7KUT8_DROME PAPS synthetase, isoform E OS=Drosophila melanogaster GN=Papss PE=1 SV=1;>tr|Q8IQV1|Q8IQV1_DROME PAPS synthetase, isoform D OS=Drosophila melanogaster GN=Papss PE=1 SV=1;>tr|Q961A8|Q961A8_DROME LD25351p OS=Drosophila melanogaster GN=Papss PE=1 SV=1;>tr|Q9VW48|Q9VW48_DROME Bifunctio…	2	2
TRUE	Contr / Rep	Contr	Rep	6	Q9V9S8	61.59	35.2505	-0.805054	0.805054	-42.7659	0.572341	0	0.000261504	0.000317541	5	0.101535	Q9V9S8	HEMH_DROME	Ferrochelatase, mitochondrial,Ferrochelatase, mitochondrial	FeCh	Q9V9S8	Drosophila melanogaster	sp		2	1	uniprot-drosophila_reviewed_unreviewed_0825_2016	>sp|Q9V9S8|HEMH_DROME Ferrochelatase, mitochondrial OS=Drosophila melanogaster GN=FeCh PE=2 SV=1,>sp|Q9V9S8|HEMH_DROME Ferrochelatase, mitochondrial OS=Drosophila melanogaster GN=FeCh PE=2 SV=1	1	1
TRUE	Contr / Rep	Contr	Rep	6	Q8SY86;Q9VQT5	129.163	411.358	1.6712	1.6712	218.48	3.1848	0	0.000268461	0.000324059	5	0.217864	Q8SY86;Q9VQT5	Q8SY86_DROME;Q9VQT5_DROME	RH31195p;FI01556p	CG16704	Q8SY86;Q9VQT5	Drosophila melanogaster	tr		2	1	uniprot-drosophila_reviewed_unreviewed_0825_2016	>tr|Q8SY86|Q8SY86_DROME RH31195p OS=Drosophila melanogaster GN=CG16704 PE=2 SV=1;>tr|Q9VQT5|Q9VQT5_DROME FI01556p OS=Drosophila melanogaster GN=CG16704 PE=2 SV=1	1	1
TRUE	Contr / Rep	Contr	Rep	24	Q9VQL1	2352.1	1818.6	-0.371122	0.371122	-22.6819	0.773181	0	0.000276505	0.000331389	23	0.0983445	Q9VQL1	Q9VQL1_DROME	LP20978p	SerRS	Q9VQL1	Drosophila melanogaster	tr		1	1	uniprot-drosophila_reviewed_unreviewed_0825_2016	>tr|Q9VQL1|Q9VQL1_DROME LP20978p OS=Drosophila melanogaster GN=SerRS PE=1 SV=1	4	4
TRUE	Contr / Rep	Contr	Rep	7	Q9VZZ6	17.6125	68.5057	1.95963	1.95963	288.962	3.88962	0	0.000277782	0.000331389	6	0.233578	Q9VZZ6	Q9VZZ6_DROME	CG16985 protein	CG16985	Q9VZZ6	Drosophila melanogaster	tr		1	1	uniprot-drosophila_reviewed_unreviewed_0825_2016	>tr|Q9VZZ6|Q9VZZ6_DROME CG16985 protein OS=Drosophila melanogaster GN=CG16985 PE=1 SV=1	1	2
TRUE	Contr / Rep	Contr	Rep	59	O77458;Q7JNS1	73353.4	65891.1	-0.154781	0.154781	-10.1731	0.898269	0	0.00028981	0.000341742	58	0.0983576	O77458;Q7JNS1	TPIS_DROYA;TPIS_DROSI	Triosephosphate isomerase	Tpi	O77458;Q7JNS1	Drosophila yakuba;Drosophila simulans	sp		2;3	1	uniprot-drosophila_reviewed_unreviewed_0825_2016	>sp|O77458|TPIS_DROYA Triosephosphate isomerase OS=Drosophila yakuba GN=Tpi PE=2 SV=1;>sp|Q7JNS1|TPIS_DROSI Triosephosphate isomerase OS=Drosophila simulans GN=Tpi PE=3 SV=1	7	11
TRUE	Contr / Rep	Contr	Rep	6	Q9XZ58	21.1057	9.52041	-1.14854	1.14854	-54.8918	0.451082	0	0.000288944	0.000341742	5	0.152797	Q9XZ58	CSN5_DROME	COP9 signalosome complex subunit 5	CSN5	Q9XZ58	Drosophila melanogaster	sp		1	1	uniprot-drosophila_reviewed_unreviewed_0825_2016	>sp|Q9XZ58|CSN5_DROME COP9 signalosome complex subunit 5 OS=Drosophila melanogaster GN=CSN5 PE=1 SV=1,>sp|Q9XZ58|CSN5_DROME COP9 signalosome complex subunit 5 OS=Drosophila melanogaster GN=CSN5 PE=1 SV=1	1	1
TRUE	Contr / Rep	Contr	Rep	18	A4V391;P12613	345.413	167.062	-1.04793	1.04793	-51.634	0.48366	0	0.000293402	0.000343989	17	0.384581	A4V391;P12613,P12613	A4V391_DROME;TCPA_DROME,TCPA_DROME	Tcp1-like, isoform B;T-complex protein 1 subunit alpha,T-complex protein 1 subunit alpha	T-cp1	A4V391;P12613,P12613	Drosophila melanogaster	tr;sp,sp		1;2,2	1;2,2	uniprot-drosophila_reviewed_unreviewed_0825_2016	>tr|A4V391|A4V391_DROME Tcp1-like, isoform B OS=Drosophila melanogaster GN=T-cp1 PE=1 SV=1;>sp|P12613|TCPA_DROME T-complex protein 1 subunit alpha OS=Drosophila melanogaster GN=T-cp1 PE=2 SV=2,>sp|P12613|TCPA_DROME T-complex protein 1 subunit alpha OS=Drosophila melanogaster GN=T-cp1 PE=2 SV=2	3	3
TRUE	Contr / Rep	Contr	Rep	36	A0A0B4LFZ4;D0IQG4;Q7KN62	11564.2	6499.8	-0.831197	0.831197	-43.7937	0.562063	0	0.000299135	0.000348706	35	0.12288	A0A0B4LFZ4;D0IQG4;Q7KN62,Q7KN62	A0A0B4LFZ4_DROME;D0IQG4_DROME;TERA_DROME,TERA_DROME	TER94, isoform E;AT24528p (Fragment);Transitional endoplasmic reticulum ATPase TER94,Transitional endoplasmic reticulum ATPase TER94	TER94;TER94-RC;TER94,TER94	A0A0B4LFZ4;D0IQG4;Q7KN62,Q7KN62	Drosophila melanogaster	tr;tr;sp,sp		1;2;1,1	1	uniprot-drosophila_reviewed_unreviewed_0825_2016	>tr|A0A0B4LFZ4|A0A0B4LFZ4_DROME TER94, isoform E OS=Drosophila melanogaster GN=TER94 PE=1 SV=1;>tr|D0IQG4|D0IQG4_DROME AT24528p (Fragment) OS=Drosophila melanogaster GN=TER94-RC PE=2 SV=1;>sp|Q7KN62|TERA_DROME Transitional endoplasmic reticulum ATPase TER94 OS=Drosophila melanogaster GN=TER94 PE=1 SV=1,>sp|Q7KN62|TERA_DROME Transitional endoplasmic reticulum ATPase TER94 OS=Drosophila melanogaste…	6	6
TRUE	Contr / Rep	Contr	Rep	6	P46223;X2JCS6	665.004	340.068	-0.967541	0.967541	-48.8623	0.511377	0	0.00030652	0.000355285	5	0.137204	P46223,P46223;X2JCS6	RL7A_DROME,RL7A_DROME;X2JCS6_DROME	60S ribosomal protein L7a,60S ribosomal protein L7a;Ribosomal protein L7A, isoform E	RpL7A	P46223,P46223;X2JCS6	Drosophila melanogaster	sp,sp;tr		1,1;4	2,2;1	uniprot-drosophila_reviewed_unreviewed_0825_2016	>sp|P46223|RL7A_DROME 60S ribosomal protein L7a OS=Drosophila melanogaster GN=RpL7A PE=1 SV=2,>sp|P46223|RL7A_DROME 60S ribosomal protein L7a OS=Drosophila melanogaster GN=RpL7A PE=1 SV=2;>tr|X2JCS6|X2JCS6_DROME Ribosomal protein L7A, isoform E OS=Drosophila melanogaster GN=RpL7A PE=4 SV=1	1	2
TRUE	Contr / Rep	Contr	Rep	28	Q9VJJ0	3102.15	1473.66	-1.07386	1.07386	-52.4955	0.475045	0	0.000314939	0.00036298	27	0.209814	Q9VJJ0	Q9VJJ0_DROME	Proteasome subunit beta type	Prosbeta4	Q9VJJ0	Drosophila melanogaster	tr		1	1	uniprot-drosophila_reviewed_unreviewed_0825_2016	>tr|Q9VJJ0|Q9VJJ0_DROME Proteasome subunit beta type OS=Drosophila melanogaster GN=Prosbeta4 PE=1 SV=1	5	5
TRUE	Contr / Rep	Contr	Rep	37	Q6BCZ0;Q9VHR8	1852.72	1516.12	-0.289259	0.289259	-18.1678	0.818322	0	0.000324886	0.000371869	36	0.178056	Q6BCZ0;Q9VHR8,Q9VHR8	Q6BCZ0_DROME;DPP3_DROME,DPP3_DROME	CG7415 (Fragment);Dipeptidyl peptidase 3,Dipeptidyl peptidase 3	;DppIII,DppIII	Q6BCZ0;Q9VHR8,Q9VHR8	Drosophila melanogaster	tr;sp,sp		2	1;2,2	uniprot-drosophila_reviewed_unreviewed_0825_2016	>tr|Q6BCZ0|Q6BCZ0_DROME CG7415 (Fragment) OS=Drosophila melanogaster PE=2 SV=1;>sp|Q9VHR8|DPP3_DROME Dipeptidyl peptidase 3 OS=Drosophila melanogaster GN=DppIII PE=2 SV=2,>sp|Q9VHR8|DPP3_DROME Dipeptidyl peptidase 3 OS=Drosophila melanogaster GN=DppIII PE=2 SV=2	6	7
TRUE	Contr / Rep	Contr	Rep	6	Q9VBT8	20.7116	14.5052	-0.51387	0.51387	-29.9659	0.700341	0	0.000326297	0.000371869	5	0.0706649	Q9VBT8	Q9VBT8_DROME	IP11925p	CG11878	Q9VBT8	Drosophila melanogaster	tr		2	1	uniprot-drosophila_reviewed_unreviewed_0825_2016	>tr|Q9VBT8|Q9VBT8_DROME IP11925p OS=Drosophila melanogaster GN=CG11878 PE=2 SV=1	1	1
TRUE	Contr / Rep	Contr	Rep	12	E2QD65;P39018	524.805	153.768	-1.77103	1.77103	-70.7	0.293	0	0.000330983	0.000375114	11	0.429418	E2QD65;P39018,P39018	E2QD65_DROME;RS19A_DROME,RS19A_DROME	Ribosomal protein S19a, isoform C;40S ribosomal protein S19a,40S ribosomal protein S19a	RpS19a	E2QD65;P39018,P39018	Drosophila melanogaster	tr;sp,sp		1	1;3,3	uniprot-drosophila_reviewed_unreviewed_0825_2016	>tr|E2QD65|E2QD65_DROME Ribosomal protein S19a, isoform C OS=Drosophila melanogaster GN=RpS19a PE=1 SV=1;>sp|P39018|RS19A_DROME 40S ribosomal protein S19a OS=Drosophila melanogaster GN=RpS19a PE=1 SV=3,>sp|P39018|RS19A_DROME 40S ribosomal protein S19a OS=Drosophila melanogaster GN=RpS19a PE=1 SV=3	2	2
TRUE	Contr / Rep	Contr	Rep	6	M9PD88;Q95RR1	156.396	64.1057	-1.28668	1.28668	-59.0106	0.409894	0	0.000334537	0.000377047	5	0.186621	M9PD88;Q95RR1	M9PD88_DROME;Q95RR1_DROME	Atox1, isoform B;Atox1, isoform A	Atox1	M9PD88;Q95RR1	Drosophila melanogaster	tr		1	1	uniprot-drosophila_reviewed_unreviewed_0825_2016	>tr|M9PD88|M9PD88_DROME Atox1, isoform B OS=Drosophila melanogaster GN=Atox1 PE=1 SV=1;>tr|Q95RR1|Q95RR1_DROME Atox1, isoform A OS=Drosophila melanogaster GN=Atox1 PE=1 SV=1	1	1
TRUE	Contr / Rep	Contr	Rep	24	Q9W227	10871.8	8635.92	-0.332173	0.332173	-20.5661	0.794339	0	0.000364889	0.000408996	23	0.128067	Q9W227	Q9W227_DROME	Peptidyl-prolyl cis-trans isomerase	CG2852	Q9W227	Drosophila melanogaster	tr		1	1	uniprot-drosophila_reviewed_unreviewed_0825_2016	>tr|Q9W227|Q9W227_DROME Peptidyl-prolyl cis-trans isomerase OS=Drosophila melanogaster GN=CG2852 PE=1 SV=1	5	5
TRUE	Contr / Rep	Contr	Rep	25	Q9VQT8	4181.73	3429.27	-0.286198	0.286198	-17.994	0.82006	0	0.000368205	0.000410458	24	0.113142	Q9VQT8	Q9VQT8_DROME	Immune induced molecule 33, isoform A	IM33	Q9VQT8	Drosophila melanogaster	tr		1	1	uniprot-drosophila_reviewed_unreviewed_0825_2016	>tr|Q9VQT8|Q9VQT8_DROME Immune induced molecule 33, isoform A OS=Drosophila melanogaster GN=IM33 PE=1 SV=1	2	5
TRUE	Contr / Rep	Contr	Rep	12	Q24150;Q9W1G7	250.177	114.937	-1.12211	1.12211	-54.0577	0.459423	0	0.00038071	0.000422092	11	0.261249	Q24150;Q9W1G7	Q24150_DROME;Q9W1G7_DROME	Nucleosome assembly protein NAP-1;LD21576p	Nap1	Q24150;Q9W1G7	Drosophila melanogaster	tr		2;1	1	uniprot-drosophila_reviewed_unreviewed_0825_2016	>tr|Q24150|Q24150_DROME Nucleosome assembly protein NAP-1 OS=Drosophila melanogaster GN=Nap1 PE=2 SV=1;>tr|Q9W1G7|Q9W1G7_DROME LD21576p OS=Drosophila melanogaster GN=Nap1 PE=1 SV=1	2	2
TRUE	Contr / Rep	Contr	Rep	18	M9PG62;P25161	284.231	228.06	-0.317653	0.317653	-19.7626	0.802374	0	0.000385318	0.000424892	17	0.0765009	M9PG62;P25161,P25161	M9PG62_DROME;PSMD3_DROME,PSMD3_DROME	Regulatory particle non-ATPase 3, isoform B;Probable 26S proteasome non-ATPase regulatory subunit 3,Probable 26S proteasome non-ATPase regulatory subunit 3	Rpn3	M9PG62;P25161,P25161	Drosophila melanogaster	tr;sp,sp		1;2,2	1	uniprot-drosophila_reviewed_unreviewed_0825_2016	>tr|M9PG62|M9PG62_DROME Regulatory particle non-ATPase 3, isoform B OS=Drosophila melanogaster GN=Rpn3 PE=1 SV=1;>sp|P25161|PSMD3_DROME Probable 26S proteasome non-ATPase regulatory subunit 3 OS=Drosophila melanogaster GN=Rpn3 PE=2 SV=1,>sp|P25161|PSMD3_DROME Probable 26S proteasome non-ATPase regulatory subunit 3 OS=Drosophila melanogaster GN=Rpn3 PE=2 SV=1	3	3
TRUE	Contr / Rep	Contr	Rep	12	A8E700;D2NUH9;H1ZYF1;P29327	5103.58	3218.27	-0.665223	0.665223	-36.9409	0.630591	0	0.000389787	0.000427508	11	0.0971279	A8E700;D2NUH9;H1ZYF1;P29327,P29327	A8E700_DROME;D2NUH9_DROME;H1ZYF1_DROME;RS6_DROME,RS6_DROME	IP19982p (Fragment);TA01224p (Fragment);40S ribosomal protein S6;40S ribosomal protein S6,40S ribosomal protein S6	RpS6;RpS6-RB;RpS6;RpS6,RpS6	A8E700;D2NUH9;H1ZYF1;P29327,P29327	Drosophila melanogaster	tr;tr;tr;sp,sp		2;2;3;1,1	1	uniprot-drosophila_reviewed_unreviewed_0825_2016	>tr|A8E700|A8E700_DROME IP19982p (Fragment) OS=Drosophila melanogaster GN=RpS6 PE=2 SV=1;>tr|D2NUH9|D2NUH9_DROME TA01224p (Fragment) OS=Drosophila melanogaster GN=RpS6-RB PE=2 SV=1;>tr|H1ZYF1|H1ZYF1_DROME 40S ribosomal protein S6 OS=Drosophila melanogaster GN=RpS6 PE=3 SV=1;>sp|P29327|RS6_DROME 40S ribosomal protein S6 OS=Drosophila melanogaster GN=RpS6 PE=1 SV=1,>sp|P29327|RS6_DROME 40S ribosoma…	2	2
TRUE	Contr / Rep	Contr	Rep	60	A0A0B4LHX6;A0A0B4LJ12;A8E6J4;P08879;Q6XI71	97777.6	83513.1	-0.2275	0.2275	-14.5887	0.854113	0	0.000397625	0.000433773	59	0.105878	A0A0B4LHX6;A0A0B4LJ12;A8E6J4;P08879,P08879;Q6XI71	A0A0B4LHX6_DROME;A0A0B4LJ12_DROME;A8E6J4_DROME;NDKA_DROME,NDKA_DROME;NDKA_DROYA	Nucleoside diphosphate kinase;Nucleoside diphosphate kinase;Nucleoside diphosphate kinase;Nucleoside diphosphate kinase,Nucleoside diphosphate kinase;Nucleoside diphosphate kinase (Fragment)	awd	A0A0B4LHX6;A0A0B4LJ12;A8E6J4;P08879,P08879;Q6XI71	Drosophila melanogaster;Drosophila melanogaster;Drosophila melanogaster;Drosophila melanogaster,Drosophila melanogaster;Drosophila yakuba	tr;tr;tr;sp,sp;sp		1;1;2;1,1;2	1;1;1;3,3;1	uniprot-drosophila_reviewed_unreviewed_0825_2016	>tr|A0A0B4LHX6|A0A0B4LHX6_DROME Nucleoside diphosphate kinase OS=Drosophila melanogaster GN=awd PE=1 SV=1;>tr|A0A0B4LJ12|A0A0B4LJ12_DROME Nucleoside diphosphate kinase OS=Drosophila melanogaster GN=awd PE=1 SV=1;>tr|A8E6J4|A8E6J4_DROME Nucleoside diphosphate kinase OS=Drosophila melanogaster GN=awd PE=2 SV=1;>sp|P08879|NDKA_DROME Nucleoside diphosphate kinase OS=Drosophila melanogaster GN=awd PE=…	7	11
TRUE	Contr / Rep	Contr	Rep	36	Q8IN44	36739.7	23895.8	-0.620584	0.620584	-34.9592	0.650408	0	0.000426098	0.000459916	35	0.165803	Q8IN44	TOTA_DROME	Protein Turandot A	TotA	Q8IN44	Drosophila melanogaster	sp		1	1	uniprot-drosophila_reviewed_unreviewed_0825_2016	>sp|Q8IN44|TOTA_DROME Protein Turandot A OS=Drosophila melanogaster GN=TotA PE=1 SV=1,>sp|Q8IN44|TOTA_DROME Protein Turandot A OS=Drosophila melanogaster GN=TotA PE=1 SV=1	5	6
TRUE	Contr / Rep	Contr	Rep	84	Q9VC18	5016.65	6703.8	0.418255	0.418255	33.631	1.33631	0	0.000424181	0.000459916	83	0.088954	Q9VC18	Q9VC18_DROME	RE29555p	CG11089	Q9VC18	Drosophila melanogaster	tr		1	1	uniprot-drosophila_reviewed_unreviewed_0825_2016	>tr|Q9VC18|Q9VC18_DROME RE29555p OS=Drosophila melanogaster GN=CG11089 PE=1 SV=1	13	14
TRUE	Contr / Rep	Contr	Rep	42	A0A0B4LF88;A0A0B4LGC0;Q9V6K1	323.809	266.595	-0.280492	0.280492	-17.669	0.82331	0	0.000441307	0.000473824	41	0.0969555	A0A0B4LF88;A0A0B4LGC0;Q9V6K1,Q9V6K1	A0A0B4LF88_DROME;A0A0B4LGC0_DROME;TPP2_DROME,TPP2_DROME	Tripeptidyl-peptidase II, isoform E;Tripeptidyl-peptidase II, isoform F;Tripeptidyl-peptidase 2,Tripeptidyl-peptidase 2	TppII	A0A0B4LF88;A0A0B4LGC0;Q9V6K1,Q9V6K1	Drosophila melanogaster	tr;tr;sp,sp		4;4;1,1	1;1;2,2	uniprot-drosophila_reviewed_unreviewed_0825_2016	>tr|A0A0B4LF88|A0A0B4LF88_DROME Tripeptidyl-peptidase II, isoform E OS=Drosophila melanogaster GN=TppII PE=4 SV=1;>tr|A0A0B4LGC0|A0A0B4LGC0_DROME Tripeptidyl-peptidase II, isoform F OS=Drosophila melanogaster GN=TppII PE=4 SV=1;>sp|Q9V6K1|TPP2_DROME Tripeptidyl-peptidase 2 OS=Drosophila melanogaster GN=TppII PE=1 SV=2,>sp|Q9V6K1|TPP2_DROME Tripeptidyl-peptidase 2 OS=Drosophila melanogaster GN=Tpp…	6	7
TRUE	Contr / Rep	Contr	Rep	30	C7LAH9;C9QP54;M9NG50;M9PHG2;P46150	2422.89	1380.78	-0.811248	0.811248	-43.0111	0.569889	0	0.000469838	0.000501816	29	0.130477	C7LAH9;C9QP54;M9NG50;M9PHG2;P46150,P46150	C7LAH9_DROME;C9QP54_DROME;M9NG50_DROME;M9PHG2_DROME;MOEH_DROME,MOEH_DROME	Moesin, isoform K;GH10189p (Fragment);Moesin, isoform L;Moesin, isoform M;Moesin/ezrin/radixin homolog 1,Moesin/ezrin/radixin homolog 1	Moe;Moe-RA;Moe;Moe;Moe,Moe	C7LAH9;C9QP54;M9NG50;M9PHG2;P46150,P46150	Drosophila melanogaster	tr;tr;tr;tr;sp,sp		1;2;1;1;1,1	1;1;1;1;2,2	uniprot-drosophila_reviewed_unreviewed_0825_2016	>tr|C7LAH9|C7LAH9_DROME Moesin, isoform K OS=Drosophila melanogaster GN=Moe PE=1 SV=1;>tr|C9QP54|C9QP54_DROME GH10189p (Fragment) OS=Drosophila melanogaster GN=Moe-RA PE=2 SV=1;>tr|M9NG50|M9NG50_DROME Moesin, isoform L OS=Drosophila melanogaster GN=Moe PE=1 SV=1;>tr|M9PHG2|M9PHG2_DROME Moesin, isoform M OS=Drosophila melanogaster GN=Moe PE=1 SV=1;>sp|P46150|MOEH_DROME Moesin/ezrin/radixin homolog…	5	5
TRUE	Contr / Rep	Contr	Rep	6	D2NUJ1;P82890	473.742	684.375	0.530685	0.530685	44.4615	1.44461	0	0.000477167	0.00050699	5	0.0730413	D2NUJ1;P82890,P82890	D2NUJ1_DROME;PPAC1_DROME,PPAC1_DROME	TA01420p;Low molecular weight phosphotyrosine protein phosphatase 1,Low molecular weight phosphotyrosine protein phosphatase 1	primo-1-RB;primo-1,primo-1	D2NUJ1;P82890,P82890	Drosophila melanogaster	tr;sp,sp		2	1	uniprot-drosophila_reviewed_unreviewed_0825_2016	>tr|D2NUJ1|D2NUJ1_DROME TA01420p OS=Drosophila melanogaster GN=primo-1-RB PE=2 SV=1;>sp|P82890|PPAC1_DROME Low molecular weight phosphotyrosine protein phosphatase 1 OS=Drosophila melanogaster GN=primo-1 PE=2 SV=1,>sp|P82890|PPAC1_DROME Low molecular weight phosphotyrosine protein phosphatase 1 OS=Drosophila melanogaster GN=primo-1 PE=2 SV=1	1	1
TRUE	Contr / Rep	Contr	Rep	6	Q9VCJ8	8.5645	23.5065	1.45662	1.45662	174.464	2.74464	0	0.000505798	0.000534626	5	0.199481	Q9VCJ8	Q9VCJ8_DROME	GH28857p	SPE	Q9VCJ8	Drosophila melanogaster	tr		1	2	uniprot-drosophila_reviewed_unreviewed_0825_2016	>tr|Q9VCJ8|Q9VCJ8_DROME GH28857p OS=Drosophila melanogaster GN=SPE PE=1 SV=2	1	1
TRUE	Contr / Rep	Contr	Rep	6	A4V1F9;H9BVD2;H9BVD3;H9BVD4;H9BVD5;H9BVD7;P0CG69;P15357;P18101;P62987;Q24575;Q24576;Q24577;Q27927;Q7JPZ2;Q7JPZ3;Q7JYK1;Q8IGR0;Q8MSM5;Q8MT02;Q9W418;R9PY16	123.601	43.0742	-1.52079	1.52079	-65.1504	0.348496	0	0.000511483	0.000537848	5	0.217391	A4V1F9;H9BVD2;H9BVD3;H9BVD4;H9BVD5;H9BVD7;P0CG69,P0CG69;P15357,P15357;P18101,P18101;P62987;Q24575;Q24576;Q24577;Q27927;Q7JPZ2;Q7JPZ3;Q7JYK1;Q8IGR0;Q8MSM5;Q8MT02;Q9W418;R9PY16	A4V1F9_DROME;H9BVD2_DROME;H9BVD3_DROME;H9BVD4_DROME;H9BVD5_DROME;H9BVD7_DROME;UBIQP_DROME,UBIQP_DROME;RS27A_DROME,RS27A_DROME;RL40_DROME,RL40_DROME;RL40_HUMAN;Q24575_DROME;Q24576_DROME;Q24577_DROME;Q27927_DROME;Q7JPZ2_DROME;Q7JPZ3_DROME;Q7JYK1_DROME;Q8IGR0_DROME;Q8MSM5_DROME;Q8MT02_DROME;Q9W418_DROME;R9PY16_DROME	Ubiquitin-63E, isoform C;Polyubiquitin (Fragment);Polyubiquitin (Fragment);Polyubiquitin (Fragment);Polyubiquitin (Fragment);Polyubiquitin (Fragment);Polyubiquitin,Polyubiquitin;Ubiquitin-40S ribosomal protein S27a,Ubiquitin-40S ribosomal protein S27a;Ubiquitin-60S ribosomal protein L40,Ubiquitin-60S ribosomal protein L40;Ubiquitin-60S ribosomal protein L40;D.melanogaster ubiquitin (Fragment);D.m…	Ubi-p63E;;;;;;Ubi-p63E,Ubi-p63E;RpS27A,RpS27A;RpL40,RpL40;UBA52;Ubi-p63E;Ubi-p63E;Ubi-p63E;Ubi-p63E;Ubi-p63E;Ubi-p63E;RpL40;aru;Ubi-p63E;Ubi-p5E;Ubi-p5E;CG11700	A4V1F9;H9BVD2;H9BVD3;H9BVD4;H9BVD5;H9BVD7;P0CG69,P0CG69;P15357,P15357;P18101,P18101;P62987;Q24575;Q24576;Q24577;Q27927;Q7JPZ2;Q7JPZ3;Q7JYK1;Q8IGR0;Q8MSM5;Q8MT02;Q9W418;R9PY16	Drosophila melanogaster;Drosophila melanogaster;Drosophila melanogaster;Drosophila melanogaster;Drosophila melanogaster;Drosophila melanogaster;Drosophila melanogaster,Drosophila melanogaster;Drosophila melanogaster,Drosophila melanogaster;Drosophila melanogaster,Drosophila melanogaster;Homo sapiens;Drosophila melanogaster;Drosophila melanogaster;Drosophila melanogaster;Drosophila melanogaster;Dr…	tr;tr;tr;tr;tr;tr;sp,sp;sp,sp;sp,sp;sp;tr;tr;tr;tr;tr;tr;tr;tr;tr;tr;tr;tr		4;2;2;2;2;2;3,3;1,1;1,1;1;4;4;4;4;4;4;1;2;2;2;2;4	1;1;1;1;1;1;1,1;2,2;2,2;2;1;1;1;1;1;1;1;1;1;1;3;1	uniprot-drosophila_reviewed_unreviewed_0825_2016	>tr|A4V1F9|A4V1F9_DROME Ubiquitin-63E, isoform C OS=Drosophila melanogaster GN=Ubi-p63E PE=4 SV=1;>tr|H9BVD2|H9BVD2_DROME Polyubiquitin (Fragment) OS=Drosophila melanogaster PE=2 SV=1;>tr|H9BVD3|H9BVD3_DROME Polyubiquitin (Fragment) OS=Drosophila melanogaster PE=2 SV=1;>tr|H9BVD4|H9BVD4_DROME Polyubiquitin (Fragment) OS=Drosophila melanogaster PE=2 SV=1;>tr|H9BVD5|H9BVD5_DROME Polyubiquitin (Frag…	1	1
TRUE	Contr / Rep	Contr	Rep	12	Q7KLX3	244.726	133.37	-0.875736	0.875736	-45.5024	0.544976	0	0.000516494	0.000540333	11	0.166243	Q7KLX3	Q7KLX3_DROME	GM12291p	Tapdelta	Q7KLX3	Drosophila melanogaster	tr		1	1	uniprot-drosophila_reviewed_unreviewed_0825_2016	>tr|Q7KLX3|Q7KLX3_DROME GM12291p OS=Drosophila melanogaster GN=Tapdelta PE=1 SV=1	2	2
TRUE	Contr / Rep	Contr	Rep	126	Q7KTG2	5652.99	4354.25	-0.376589	0.376589	-22.9743	0.770257	0	0.000528442	0.000550011	125	0.0810047	Q7KTG2	Q7KTG2_DROME	Apolipoprotein lipid transfer particle	Apoltp	Q7KTG2	Drosophila melanogaster	tr		1	2	uniprot-drosophila_reviewed_unreviewed_0825_2016	>tr|Q7KTG2|Q7KTG2_DROME Apolipoprotein lipid transfer particle OS=Drosophila melanogaster GN=Apoltp PE=1 SV=2	19	21
TRUE	Contr / Rep	Contr	Rep	12	F3YDM3;Q2LZI9;Q6AWN0	60.8887	110.857	0.864456	0.864456	82.0653	1.82065	0	0.000546877	0.000566309	11	0.152587	F3YDM3;Q2LZI9;Q6AWN0,Q6AWN0	F3YDM3_DROME;MTND_DROPS;MTND_DROME,MTND_DROME	RH18256p (Fragment);1,2-dihydroxy-3-keto-5-methylthiopentene dioxygenase;1,2-dihydroxy-3-keto-5-methylthiopentene dioxygenase,1,2-dihydroxy-3-keto-5-methylthiopentene dioxygenase	CG32068-RB;GA16655;Adi1,Adi1	F3YDM3;Q2LZI9;Q6AWN0,Q6AWN0	Drosophila melanogaster;Drosophila pseudoobscura pseudoobscura;Drosophila melanogaster,Drosophila melanogaster	tr;sp;sp,sp		2;3;2,2	1;2;2,2	uniprot-drosophila_reviewed_unreviewed_0825_2016	>tr|F3YDM3|F3YDM3_DROME RH18256p (Fragment) OS=Drosophila melanogaster GN=CG32068-RB PE=2 SV=1;>sp|Q2LZI9|MTND_DROPS 1,2-dihydroxy-3-keto-5-methylthiopentene dioxygenase OS=Drosophila pseudoobscura pseudoobscura GN=GA16655 PE=3 SV=2;>sp|Q6AWN0|MTND_DROME 1,2-dihydroxy-3-keto-5-methylthiopentene dioxygenase OS=Drosophila melanogaster GN=Adi1 PE=2 SV=2,>sp|Q6AWN0|MTND_DROME 1,2-dihydroxy-3-keto-5-m…	2	2
TRUE	Contr / Rep	Contr	Rep	48	O18404	14654.1	15256.9	0.0581606	0.0581606	4.11375	1.04114	0	0.000559827	0.000576791	47	0.174291	O18404	HCD2_DROME	3-hydroxyacyl-CoA dehydrogenase type-2	scu	O18404	Drosophila melanogaster	sp		1	1	uniprot-drosophila_reviewed_unreviewed_0825_2016	>sp|O18404|HCD2_DROME 3-hydroxyacyl-CoA dehydrogenase type-2 OS=Drosophila melanogaster GN=scu PE=1 SV=1,>sp|O18404|HCD2_DROME 3-hydroxyacyl-CoA dehydrogenase type-2 OS=Drosophila melanogaster GN=scu PE=1 SV=1	7	9
TRUE	Contr / Rep	Contr	Rep	30	F3YDH0;P29844	2248.12	1637.11	-0.457568	0.457568	-27.1787	0.728213	0	0.000565343	0.000579547	29	0.136291	F3YDH0;P29844,P29844	F3YDH0_DROME;HSP7C_DROME,HSP7C_DROME	Heat shock 70-kDa protein cognate 3, isoform E;Heat shock 70 kDa protein cognate 3,Heat shock 70 kDa protein cognate 3	Hsc70-3	F3YDH0;P29844,P29844	Drosophila melanogaster	tr;sp,sp		1;2,2	1;2,2	uniprot-drosophila_reviewed_unreviewed_0825_2016	>tr|F3YDH0|F3YDH0_DROME Heat shock 70-kDa protein cognate 3, isoform E OS=Drosophila melanogaster GN=Hsc70-3 PE=1 SV=1;>sp|P29844|HSP7C_DROME Heat shock 70 kDa protein cognate 3 OS=Drosophila melanogaster GN=Hsc70-3 PE=2 SV=2,>sp|P29844|HSP7C_DROME Heat shock 70 kDa protein cognate 3 OS=Drosophila melanogaster GN=Hsc70-3 PE=2 SV=2	5	5
TRUE	Contr / Rep	Contr	Rep	6	L0CPD9;L0CPE3;L0CPK9;L0CPL5;L0CPM0;L0CQQ8;L0CQR2;L0CR44;L0CR49;L0CRF4;L0CRF8;Q0E9B6;Q292D0;Q6XHX5	353.502	173.97	-1.02288	1.02288	-50.7867	0.492133	0	0.000586022	0.000597742	5	0.148375	L0CPD9;L0CPE3;L0CPK9;L0CPL5;L0CPM0;L0CQQ8;L0CQR2;L0CR44;L0CR49;L0CRF4;L0CRF8;Q0E9B6,Q0E9B6;Q292D0;Q6XHX5	L0CPD9_DROME;L0CPE3_DROME;L0CPK9_DROME;L0CPL5_DROME;L0CPM0_DROME;L0CQQ8_DROME;L0CQR2_DROME;L0CR44_DROME;L0CR49_DROME;L0CRF4_DROME;L0CRF8_DROME;RS11_DROME,RS11_DROME;RS11_DROPS;RS11_DROYA	Ribosomal protein S11 (Fragment);Ribosomal protein S11 (Fragment);Ribosomal protein S11 (Fragment);Ribosomal protein S11 (Fragment);Ribosomal protein S11 (Fragment);Ribosomal protein S11 (Fragment);Ribosomal protein S11 (Fragment);Ribosomal protein S11 (Fragment);Ribosomal protein S11 (Fragment);Ribosomal protein S11 (Fragment);Ribosomal protein S11 (Fragment);40S ribosomal protein S11,40S riboso…	RPS11;RPS11;RPS11;RPS11;RPS11;RPS11;RPS11;RPS11;RPS11;RPS11;RPS11;RpS11,RpS11;RpS11;RpS11	L0CPD9;L0CPE3;L0CPK9;L0CPL5;L0CPM0;L0CQQ8;L0CQR2;L0CR44;L0CR49;L0CRF4;L0CRF8;Q0E9B6,Q0E9B6;Q292D0;Q6XHX5	Drosophila melanogaster;Drosophila melanogaster;Drosophila melanogaster;Drosophila melanogaster;Drosophila melanogaster;Drosophila melanogaster;Drosophila melanogaster;Drosophila melanogaster;Drosophila melanogaster;Drosophila melanogaster;Drosophila melanogaster;Drosophila melanogaster,Drosophila melanogaster;Drosophila pseudoobscura pseudoobscura;Drosophila yakuba	tr;tr;tr;tr;tr;tr;tr;tr;tr;tr;tr;sp,sp;sp;sp		3;3;3;3;3;3;3;3;3;3;3;1,1;3;2	1;1;1;1;1;1;1;1;1;1;1;1,1;2;1	uniprot-drosophila_reviewed_unreviewed_0825_2016	>tr|L0CPD9|L0CPD9_DROME Ribosomal protein S11 (Fragment) OS=Drosophila melanogaster GN=RPS11 PE=3 SV=1;>tr|L0CPE3|L0CPE3_DROME Ribosomal protein S11 (Fragment) OS=Drosophila melanogaster GN=RPS11 PE=3 SV=1;>tr|L0CPK9|L0CPK9_DROME Ribosomal protein S11 (Fragment) OS=Drosophila melanogaster GN=RPS11 PE=3 SV=1;>tr|L0CPL5|L0CPL5_DROME Ribosomal protein S11 (Fragment) OS=Drosophila melanogaster GN=RPS…	1	1
TRUE	Contr / Rep	Contr	Rep	24	D5A7M1;Q9W1C9	22437.9	17329.4	-0.372716	0.372716	-22.7673	0.772327	0	0.000600355	0.000609316	23	0.0611171	D5A7M1;Q9W1C9,Q9W1C9	D5A7M1_DROME;PEB3_DROME,PEB3_DROME	Ejaculatory bulb protein III, isoform B;Ejaculatory bulb-specific protein 3,Ejaculatory bulb-specific protein 3	EbpIII	D5A7M1;Q9W1C9,Q9W1C9	Drosophila melanogaster	tr;sp,sp		1;2,2	1;2,2	uniprot-drosophila_reviewed_unreviewed_0825_2016	>tr|D5A7M1|D5A7M1_DROME Ejaculatory bulb protein III, isoform B OS=Drosophila melanogaster GN=EbpIII PE=1 SV=1;>sp|Q9W1C9|PEB3_DROME Ejaculatory bulb-specific protein 3 OS=Drosophila melanogaster GN=EbpIII PE=2 SV=2,>sp|Q9W1C9|PEB3_DROME Ejaculatory bulb-specific protein 3 OS=Drosophila melanogaster GN=EbpIII PE=2 SV=2	4	5
TRUE	Contr / Rep	Contr	Rep	18	P41093	3629.5	2022.61	-0.84355	0.84355	-44.273	0.55727	0	0.000620961	0.000624169	17	0.120807	P41093	RL18A_DROME	60S ribosomal protein L18a	RpL18A	P41093	Drosophila melanogaster	sp		1	1	uniprot-drosophila_reviewed_unreviewed_0825_2016	>sp|P41093|RL18A_DROME 60S ribosomal protein L18a OS=Drosophila melanogaster GN=RpL18A PE=1 SV=1,>sp|P41093|RL18A_DROME 60S ribosomal protein L18a OS=Drosophila melanogaster GN=RpL18A PE=1 SV=1	2	3
TRUE	Contr / Rep	Contr	Rep	18	M9ZVK8;P40796;Q8T8V5	179.2	117.066	-0.614243	0.614243	-34.6727	0.653273	0	0.000621109	0.000624169	17	0.151272	M9ZVK8;P40796,P40796;Q8T8V5	M9ZVK8_DROME;LA_DROME,LA_DROME;Q8T8V5_DROME	FI21003p1;La protein homolog,La protein homolog;AT22034p	La-RB;La,La;La	M9ZVK8;P40796,P40796;Q8T8V5	Drosophila melanogaster	tr;sp,sp;tr		2;1,1;2	1;2,2;1	uniprot-drosophila_reviewed_unreviewed_0825_2016	>tr|M9ZVK8|M9ZVK8_DROME FI21003p1 OS=Drosophila melanogaster GN=La-RB PE=2 SV=1;>sp|P40796|LA_DROME La protein homolog OS=Drosophila melanogaster GN=La PE=1 SV=2,>sp|P40796|LA_DROME La protein homolog OS=Drosophila melanogaster GN=La PE=1 SV=2;>tr|Q8T8V5|Q8T8V5_DROME AT22034p OS=Drosophila melanogaster GN=La PE=2 SV=1	3	3
TRUE	Contr / Rep	Contr	Rep	12	P07190	136.241	384.55	1.49701	1.49701	182.257	2.82257	0	0.000635184	0.000635184	11	0.321258	P07190	MAL1_DROME	Maltase A1	Mal-A1	P07190	Drosophila melanogaster	sp		2	2	uniprot-drosophila_reviewed_unreviewed_0825_2016	>sp|P07190|MAL1_DROME Maltase A1 OS=Drosophila melanogaster GN=Mal-A1 PE=2 SV=2,>sp|P07190|MAL1_DROME Maltase A1 OS=Drosophila melanogaster GN=Mal-A1 PE=2 SV=2	2	2
TRUE	Contr / Rep	Contr	Rep	30	M9MSL3;Q9VUC1;Q9XZT5	1735.83	909.832	-0.931951	0.931951	-47.5851	0.524149	0	0.000651565	0.000648387	29	0.189363	M9MSL3;Q9VUC1;Q9XZT5	M9MSL3_DROME;Q9VUC1_DROME;Q9XZT5_DROME	Hsc70Cb, isoform G;Hsc70Cb, isoform A;Heatshock protein cognate 70Cb	Hsc70Cb	M9MSL3;Q9VUC1;Q9XZT5	Drosophila melanogaster	tr		1;1;3	1	uniprot-drosophila_reviewed_unreviewed_0825_2016	>tr|M9MSL3|M9MSL3_DROME Hsc70Cb, isoform G OS=Drosophila melanogaster GN=Hsc70Cb PE=1 SV=1;>tr|Q9VUC1|Q9VUC1_DROME Hsc70Cb, isoform A OS=Drosophila melanogaster GN=Hsc70Cb PE=1 SV=1;>tr|Q9XZT5|Q9XZT5_DROME Heatshock protein cognate 70Cb OS=Drosophila melanogaster GN=Hsc70Cb PE=3 SV=1	4	5
TRUE	Contr / Rep	Contr	Rep	18	C9QP25;Q961R8;Q9VUK8	100.7	53.0378	-0.924968	0.924968	-47.3308	0.526692	0	0.000673931	0.000667388	17	0.286595	C9QP25;Q961R8;Q9VUK8	C9QP25_DROME;Q961R8_DROME;Q9VUK8_DROME	RE19272p;GH09263p;FI18749p1	Aats-gly-RB;GlyRS;GlyRS	C9QP25;Q961R8;Q9VUK8	Drosophila melanogaster	tr		2;1;1	1	uniprot-drosophila_reviewed_unreviewed_0825_2016	>tr|C9QP25|C9QP25_DROME RE19272p OS=Drosophila melanogaster GN=Aats-gly-RB PE=2 SV=1;>tr|Q961R8|Q961R8_DROME GH09263p OS=Drosophila melanogaster GN=GlyRS PE=1 SV=1;>tr|Q9VUK8|Q9VUK8_DROME FI18749p1 OS=Drosophila melanogaster GN=GlyRS PE=1 SV=1	3	3
TRUE	Contr / Rep	Contr	Rep	18	A4UZL5;P41043	11333.3	11710	0.0471719	0.0471719	3.32375	1.03324	0	0.000697924	0.000687809	17	0.0460244	A4UZL5;P41043,P41043	A4UZL5_DROME;GSTS1_DROME,GSTS1_DROME	Glutathione S transferase S1, isoform C;Glutathione S-transferase S1,Glutathione S-transferase S1	GstS1	A4UZL5;P41043,P41043	Drosophila melanogaster	tr;sp,sp		1	1;2,2	uniprot-drosophila_reviewed_unreviewed_0825_2016	>tr|A4UZL5|A4UZL5_DROME Glutathione S transferase S1, isoform C OS=Drosophila melanogaster GN=GstS1 PE=1 SV=1;>sp|P41043|GSTS1_DROME Glutathione S-transferase S1 OS=Drosophila melanogaster GN=GstS1 PE=1 SV=2,>sp|P41043|GSTS1_DROME Glutathione S-transferase S1 OS=Drosophila melanogaster GN=GstS1 PE=1 SV=2	3	3
TRUE	Contr / Rep	Contr	Rep	24	M9PG76;P19889	5061.98	2655.21	-0.930878	0.930878	-47.5461	0.524539	0	0.000702717	0.000689203	23	0.159545	M9PG76;P19889,P19889	M9PG76_DROME;RLA0_DROME,RLA0_DROME	60S acidic ribosomal protein P0	RpLP0	M9PG76;P19889,P19889	Drosophila melanogaster	tr;sp,sp		3;1,1	1	uniprot-drosophila_reviewed_unreviewed_0825_2016	>tr|M9PG76|M9PG76_DROME 60S acidic ribosomal protein P0 OS=Drosophila melanogaster GN=RpLP0 PE=3 SV=1;>sp|P19889|RLA0_DROME 60S acidic ribosomal protein P0 OS=Drosophila melanogaster GN=RpLP0 PE=1 SV=1,>sp|P19889|RLA0_DROME 60S acidic ribosomal protein P0 OS=Drosophila melanogaster GN=RpLP0 PE=1 SV=1	3	4
TRUE	Contr / Rep	Contr	Rep	18	Q8SXQ1	268.186	387.572	0.531228	0.531228	44.5158	1.44516	0	0.000722332	0.000705051	17	0.130679	Q8SXQ1	Q8SXQ1_DROME	CG9629	CG9629	Q8SXQ1	Drosophila melanogaster	tr		1	1	uniprot-drosophila_reviewed_unreviewed_0825_2016	>tr|Q8SXQ1|Q8SXQ1_DROME CG9629 OS=Drosophila melanogaster GN=CG9629 PE=1 SV=1	2	3
TRUE	Contr / Rep	Contr	Rep	6	A8JNP2	19.5531	8.88036	-1.13871	1.13871	-54.5834	0.454166	0	0.000738951	0.000717838	5	0.18036	A8JNP2	A8JNP2_DROME	Arginine kinase, isoform E	Argk	A8JNP2	Drosophila melanogaster	tr		1	1	uniprot-drosophila_reviewed_unreviewed_0825_2016	>tr|A8JNP2|A8JNP2_DROME Arginine kinase, isoform E OS=Drosophila melanogaster GN=Argk PE=1 SV=1	1	1
TRUE	Contr / Rep	Contr	Rep	6	Q0E8E8;Q8SYD4;Q9XZE4	63.1975	19.6313	-1.68671	1.68671	-68.9365	0.310635	0	0.000749664	0.000723781	5	0.270664	Q0E8E8;Q8SYD4;Q9XZE4	Q0E8E8_DROME;Q8SYD4_DROME;Q9XZE4_DROME	MIP08013p1;RE67391p;Phosphate transporter	Mpcp	Q0E8E8;Q8SYD4;Q9XZE4	Drosophila melanogaster	tr		1;2;2	1	uniprot-drosophila_reviewed_unreviewed_0825_2016	>tr|Q0E8E8|Q0E8E8_DROME MIP08013p1 OS=Drosophila melanogaster GN=Mpcp PE=1 SV=1;>tr|Q8SYD4|Q8SYD4_DROME RE67391p OS=Drosophila melanogaster GN=Mpcp PE=2 SV=1;>tr|Q9XZE4|Q9XZE4_DROME Phosphate transporter OS=Drosophila melanogaster GN=Mpcp PE=2 SV=1	1	1
TRUE	Contr / Rep	Contr	Rep	6	A0A0B4KI24;Q27415	539.721	345.233	-0.644644	0.644644	-36.0349	0.639651	0	0.000752164	0.000723781	5	0.0956665	A0A0B4KI24;Q27415,Q27415	A0A0B4KI24_DROME;NLP_DROME,NLP_DROME	Nucleoplasmin, isoform B;Nucleoplasmin-like protein,Nucleoplasmin-like protein	Nlp	A0A0B4KI24;Q27415,Q27415	Drosophila melanogaster	tr;sp,sp		4;1,1	1	uniprot-drosophila_reviewed_unreviewed_0825_2016	>tr|A0A0B4KI24|A0A0B4KI24_DROME Nucleoplasmin, isoform B OS=Drosophila melanogaster GN=Nlp PE=4 SV=1;>sp|Q27415|NLP_DROME Nucleoplasmin-like protein OS=Drosophila melanogaster GN=Nlp PE=1 SV=1,>sp|Q27415|NLP_DROME Nucleoplasmin-like protein OS=Drosophila melanogaster GN=Nlp PE=1 SV=1	1	1
TRUE	Contr / Rep	Contr	Rep	12	M9PI82;P91891	86.6391	58.3806	-0.56953	0.56953	-32.6164	0.673836	0	0.000782617	0.000749549	11	0.149036	M9PI82;P91891,P91891	M9PI82_DROME;MO25_DROME,MO25_DROME	Mo25, isoform B;Protein Mo25,Protein Mo25	Mo25	M9PI82;P91891,P91891	Drosophila melanogaster	tr;sp,sp		4;2,2	1;2,2	uniprot-drosophila_reviewed_unreviewed_0825_2016	>tr|M9PI82|M9PI82_DROME Mo25, isoform B OS=Drosophila melanogaster GN=Mo25 PE=4 SV=1;>sp|P91891|MO25_DROME Protein Mo25 OS=Drosophila melanogaster GN=Mo25 PE=2 SV=2,>sp|P91891|MO25_DROME Protein Mo25 OS=Drosophila melanogaster GN=Mo25 PE=2 SV=2	2	2
TRUE	Contr / Rep	Contr	Rep	6	Q8SXB6;Q9VHJ5	165.741	365.955	1.14274	1.14274	120.8	2.208	0	0.000796896	0.000759658	5	0.173776	Q8SXB6;Q9VHJ5	Q8SXB6_DROME;Q9VHJ5_DROME	Carbonic anhydrase	CAHbeta	Q8SXB6;Q9VHJ5	Drosophila melanogaster	tr		2;1	1	uniprot-drosophila_reviewed_unreviewed_0825_2016	>tr|Q8SXB6|Q8SXB6_DROME Carbonic anhydrase OS=Drosophila melanogaster GN=CAHbeta PE=2 SV=1;>tr|Q9VHJ5|Q9VHJ5_DROME Carbonic anhydrase OS=Drosophila melanogaster GN=CAHbeta PE=1 SV=1	1	1
TRUE	Contr / Rep	Contr	Rep	24	M9NCR7;M9ND31;M9NE92;Q9VMP9	260.826	343.1	0.39554	0.39554	31.5435	1.31544	0	0.000805853	0.000764624	23	0.112747	M9NCR7;M9ND31;M9NE92;Q9VMP9,Q9VMP9	M9NCR7_DROME;M9ND31_DROME;M9NE92_DROME;GNPI_DROME,GNPI_DROME	Glucosamine-6-phosphate isomerase	Oscillin	M9NCR7;M9ND31;M9NE92;Q9VMP9,Q9VMP9	Drosophila melanogaster	tr;tr;tr;sp,sp		3;3;3;2,2	1	uniprot-drosophila_reviewed_unreviewed_0825_2016	>tr|M9NCR7|M9NCR7_DROME Glucosamine-6-phosphate isomerase OS=Drosophila melanogaster GN=Oscillin PE=3 SV=1;>tr|M9ND31|M9ND31_DROME Glucosamine-6-phosphate isomerase OS=Drosophila melanogaster GN=Oscillin PE=3 SV=1;>tr|M9NE92|M9NE92_DROME Glucosamine-6-phosphate isomerase OS=Drosophila melanogaster GN=Oscillin PE=3 SV=1;>sp|Q9VMP9|GNPI_DROME Glucosamine-6-phosphate isomerase OS=Drosophila melanoga…	3	4
TRUE	Contr / Rep	Contr	Rep	12	P29413;Q53YH3;Q9U916	62.8821	110.961	0.819331	0.819331	76.4587	1.76459	0	0.000820994	0.000775383	11	0.15101	P29413,P29413;Q53YH3;Q9U916	CALR_DROME,CALR_DROME;Q53YH3_DROME;Q9U916_DROME	Calreticulin,Calreticulin;Calreticulin, isoform B;Calreticulin	Crc,Crc;Calr;Calr	P29413,P29413;Q53YH3;Q9U916	Drosophila melanogaster	sp,sp;tr;tr		1,1;1;2	2,2;1;1	uniprot-drosophila_reviewed_unreviewed_0825_2016	>sp|P29413|CALR_DROME Calreticulin OS=Drosophila melanogaster GN=Crc PE=1 SV=2,>sp|P29413|CALR_DROME Calreticulin OS=Drosophila melanogaster GN=Crc PE=1 SV=2;>tr|Q53YH3|Q53YH3_DROME Calreticulin, isoform B OS=Drosophila melanogaster GN=Calr PE=1 SV=1;>tr|Q9U916|Q9U916_DROME Calreticulin OS=Drosophila melanogaster GN=Calr PE=2 SV=1	2	2
TRUE	Contr / Rep	Contr	Rep	72	Q9VL70	36037.6	32121.5	-0.165963	0.165963	-10.8667	0.891333	0	0.000848601	0.000797763	71	0.087014	Q9VL70	Q9VL70_DROME	HL08109p	yip2	Q9VL70	Drosophila melanogaster	tr		1	1	uniprot-drosophila_reviewed_unreviewed_0825_2016	>tr|Q9VL70|Q9VL70_DROME HL08109p OS=Drosophila melanogaster GN=yip2 PE=1 SV=1	10	13
TRUE	Contr / Rep	Contr	Rep	12	B3MRX2;B3P9J3;B4GTK1;B4I9F6;B4JXG8;B4L760;B4MB32;B4NPT0;B4PY37;C6SV50;P38979;Q0H6L0;Q0H6L1;Q29J14;X2JC80	1979.97	1106.52	-0.839452	0.839452	-44.1144	0.558856	0	0.000873427	0.000817336	11	0.178452	B3MRX2;B3P9J3;B4GTK1;B4I9F6;B4JXG8;B4L760;B4MB32;B4NPT0;B4PY37;C6SV50;P38979,P38979;Q0H6L0;Q0H6L1;Q29J14;X2JC80	RSSA_DROAN;RSSA_DROER;RSSA_DROPE;RSSA_DROSE;RSSA_DROGR;RSSA_DROMO;RSSA_DROVI;RSSA_DROWI;RSSA_DROYA;C6SV50_DROME;RSSA_DROME,RSSA_DROME;RSSA_DROTE;RSSA_DROSI;RSSA_DROPS;X2JC80_DROME	40S ribosomal protein SA	sta;sta;sta;sta;sta;sta;sta;sta;sta;sta-RD;sta,sta;sta;sta;sta;sta	B3MRX2;B3P9J3;B4GTK1;B4I9F6;B4JXG8;B4L760;B4MB32;B4NPT0;B4PY37;C6SV50;P38979,P38979;Q0H6L0;Q0H6L1;Q29J14;X2JC80	Drosophila ananassae;Drosophila erecta;Drosophila persimilis;Drosophila sechellia;Drosophila grimshawi;Drosophila mojavensis;Drosophila virilis;Drosophila willistoni;Drosophila yakuba;Drosophila melanogaster;Drosophila melanogaster,Drosophila melanogaster;Drosophila teissieri;Drosophila simulans;Drosophila pseudoobscura pseudoobscura;Drosophila melanogaster	sp;sp;sp;sp;sp;sp;sp;sp;sp;tr;sp,sp;sp;sp;sp;tr		3;3;3;3;3;3;3;3;2;2;1,1;3;3;3;1	1;1;1;1;1;1;1;1;1;1;2,2;1;1;2;1	uniprot-drosophila_reviewed_unreviewed_0825_2016	>sp|B3MRX2|RSSA_DROAN 40S ribosomal protein SA OS=Drosophila ananassae GN=sta PE=3 SV=1;>sp|B3P9J3|RSSA_DROER 40S ribosomal protein SA OS=Drosophila erecta GN=sta PE=3 SV=1;>sp|B4GTK1|RSSA_DROPE 40S ribosomal protein SA OS=Drosophila persimilis GN=sta PE=3 SV=1;>sp|B4I9F6|RSSA_DROSE 40S ribosomal protein SA OS=Drosophila sechellia GN=sta PE=3 SV=1;>sp|B4JXG8|RSSA_DROGR 40S ribosomal protein SA OS…	2	2
TRUE	Contr / Rep	Contr	Rep	42	C6TP78;Q76NR6;Q9VYR1	19678.5	21947.5	0.157432	0.157432	11.53	1.1153	0	0.000879516	0.000819275	41	0.0664782	C6TP78;Q76NR6;Q9VYR1	C6TP78_DROME;Q76NR6_DROME;Q9VYR1_DROME	GH22783p (Fragment);Regucalcin, isoform D;Regucalcin homologue	regucalcin-RD;regucalcin;regucalcin	C6TP78;Q76NR6;Q9VYR1	Drosophila melanogaster	tr		2;1;1	1	uniprot-drosophila_reviewed_unreviewed_0825_2016	>tr|C6TP78|C6TP78_DROME GH22783p (Fragment) OS=Drosophila melanogaster GN=regucalcin-RD PE=2 SV=1;>tr|Q76NR6|Q76NR6_DROME Regucalcin, isoform D OS=Drosophila melanogaster GN=regucalcin PE=1 SV=1;>tr|Q9VYR1|Q9VYR1_DROME Regucalcin homologue OS=Drosophila melanogaster GN=regucalcin PE=1 SV=1	6	7
TRUE	Contr / Rep	Contr	Rep	6	Q9VSS1	44.8381	24.7001	-0.860205	0.860205	-44.9126	0.550874	0	0.000888246	0.000823646	5	0.129937	Q9VSS1	Q9VSS1_DROME	Pixie, isoform A	pix	Q9VSS1	Drosophila melanogaster	tr		1	1	uniprot-drosophila_reviewed_unreviewed_0825_2016	>tr|Q9VSS1|Q9VSS1_DROME Pixie, isoform A OS=Drosophila melanogaster GN=pix PE=1 SV=1	1	1
TRUE	Contr / Rep	Contr	Rep	24	C6SUW3;P55935;Q95RG1	3629.9	1564.06	-1.21464	1.21464	-56.9118	0.430882	0	0.00117265	0.00108244	23	0.28987	C6SUW3;P55935,P55935;Q95RG1	C6SUW3_DROME;RS9_DROME,RS9_DROME;Q95RG1_DROME	LD13662p;40S ribosomal protein S9,40S ribosomal protein S9;LD32106p	RpS9	C6SUW3;P55935,P55935;Q95RG1	Drosophila melanogaster	tr;sp,sp;tr		1	1;2,2;1	uniprot-drosophila_reviewed_unreviewed_0825_2016	>tr|C6SUW3|C6SUW3_DROME LD13662p OS=Drosophila melanogaster GN=RpS9 PE=1 SV=1;>sp|P55935|RS9_DROME 40S ribosomal protein S9 OS=Drosophila melanogaster GN=RpS9 PE=1 SV=2,>sp|P55935|RS9_DROME 40S ribosomal protein S9 OS=Drosophila melanogaster GN=RpS9 PE=1 SV=2;>tr|Q95RG1|Q95RG1_DROME LD32106p OS=Drosophila melanogaster GN=RpS9 PE=1 SV=1	3	4
TRUE	Contr / Rep	Contr	Rep	6	Q494H0;Q6NL87;Q8I0D4;Q8MQM4;Q9VFR2	44.8876	124.804	1.47527	1.47527	178.036	2.78036	0	0.00119016	0.00109366	5	0.238698	Q494H0;Q6NL87;Q8I0D4;Q8MQM4;Q9VFR2	Q494H0_DROME;Q6NL87_DROME;Q8I0D4_DROME;Q8MQM4_DROME;Q9VFR2_DROME	RE64894p;RE64616p;CG9297, isoform B;RH42893p;CG9297, isoform A	CG9297;CG9297;CG9297;CG9297;CG9297-RA	Q494H0;Q6NL87;Q8I0D4;Q8MQM4;Q9VFR2	Drosophila melanogaster	tr		2;2;1;2;1	1	uniprot-drosophila_reviewed_unreviewed_0825_2016	>tr|Q494H0|Q494H0_DROME RE64894p OS=Drosophila melanogaster GN=CG9297 PE=2 SV=1;>tr|Q6NL87|Q6NL87_DROME RE64616p OS=Drosophila melanogaster GN=CG9297 PE=2 SV=1;>tr|Q8I0D4|Q8I0D4_DROME CG9297, isoform B OS=Drosophila melanogaster GN=CG9297 PE=1 SV=1;>tr|Q8MQM4|Q8MQM4_DROME RH42893p OS=Drosophila melanogaster GN=CG9297 PE=2 SV=1;>tr|Q9VFR2|Q9VFR2_DROME CG9297, isoform A OS=Drosophila melanogaster G…	1	1
TRUE	Contr / Rep	Contr	Rep	72	M9PD73;M9PDF6;M9PDR0;Q9NFV5;Q9VIT9	1656.49	1855.49	0.163676	0.163676	12.0137	1.12014	0	0.0012021	0.00109968	71	0.115016	M9PD73;M9PDF6;M9PDR0;Q9NFV5;Q9VIT9	M9PD73_DROME;M9PDF6_DROME;M9PDR0_DROME;Q9NFV5_DROME;Q9VIT9_DROME	Thioester-containing protein 4, isoform B;Thioester-containing protein 4, isoform D;Thioester-containing protein 4, isoform C;TEP4 protein;Thioester-containing protein 4, isoform A	Tep4	M9PD73;M9PDF6;M9PDR0;Q9NFV5;Q9VIT9	Drosophila melanogaster	tr		1;1;1;2;1	1;1;1;1;2	uniprot-drosophila_reviewed_unreviewed_0825_2016	>tr|M9PD73|M9PD73_DROME Thioester-containing protein 4, isoform B OS=Drosophila melanogaster GN=Tep4 PE=1 SV=1;>tr|M9PDF6|M9PDF6_DROME Thioester-containing protein 4, isoform D OS=Drosophila melanogaster GN=Tep4 PE=1 SV=1;>tr|M9PDR0|M9PDR0_DROME Thioester-containing protein 4, isoform C OS=Drosophila melanogaster GN=Tep4 PE=1 SV=1;>tr|Q9NFV5|Q9NFV5_DROME TEP4 protein OS=Drosophila melanogaster GN…	11	13
TRUE	Contr / Rep	Contr	Rep	6	Q9VDC0	35.1813	111.873	1.66898	1.66898	217.99	3.1799	0	0.00123935	0.00112869	5	0.280828	Q9VDC0	Q9VDC0_DROME	CG3301, isoform A	CG3301	Q9VDC0	Drosophila melanogaster	tr		1	1	uniprot-drosophila_reviewed_unreviewed_0825_2016	>tr|Q9VDC0|Q9VDC0_DROME CG3301, isoform A OS=Drosophila melanogaster GN=CG3301 PE=1 SV=1	1	1
TRUE	Contr / Rep	Contr	Rep	6	O18373	307.962	159.388	-0.950211	0.950211	-48.2443	0.517557	0	0.00125644	0.00113778	5	0.160575	O18373	SPS1_DROME	Selenide, water dikinase,Selenide, water dikinase	SelD	O18373	Drosophila melanogaster	sp		2	1	uniprot-drosophila_reviewed_unreviewed_0825_2016	>sp|O18373|SPS1_DROME Selenide, water dikinase OS=Drosophila melanogaster GN=SelD PE=2 SV=1,>sp|O18373|SPS1_DROME Selenide, water dikinase OS=Drosophila melanogaster GN=SelD PE=2 SV=1	1	1
TRUE	Contr / Rep	Contr	Rep	13	Q9VU35	15590	11279.9	-0.466859	0.466859	-27.6462	0.723538	0	0.00126048	0.00113778	12	0.130839	Q9VU35	Q9VU35_DROME	RH34413p	CG11267	Q9VU35	Drosophila melanogaster	tr		1	1	uniprot-drosophila_reviewed_unreviewed_0825_2016	>tr|Q9VU35|Q9VU35_DROME RH34413p OS=Drosophila melanogaster GN=CG11267 PE=1 SV=1	3	3
TRUE	Contr / Rep	Contr	Rep	6	Q9VKJ0	253.803	239.481	-0.0838018	0.0838018	-5.64321	0.943568	0	0.00130071	0.00116892	5	0.0985342	Q9VKJ0	HGD_DROME	Homogentisate 1,2-dioxygenase,Homogentisate 1,2-dioxygenase	hgo	Q9VKJ0	Drosophila melanogaster	sp		2	3	uniprot-drosophila_reviewed_unreviewed_0825_2016	>sp|Q9VKJ0|HGD_DROME Homogentisate 1,2-dioxygenase OS=Drosophila melanogaster GN=hgo PE=2 SV=3,>sp|Q9VKJ0|HGD_DROME Homogentisate 1,2-dioxygenase OS=Drosophila melanogaster GN=hgo PE=2 SV=3	1	2
TRUE	Contr / Rep	Contr	Rep	6	Q95SI7	51.0326	13.6013	-1.90767	1.90767	-73.3478	0.266522	0	0.0013163	0.00117774	5	0.265139	Q95SI7	Q95SI7_DROME	CG6028	CG6028	Q95SI7	Drosophila melanogaster	tr		1	1	uniprot-drosophila_reviewed_unreviewed_0825_2016	>tr|Q95SI7|Q95SI7_DROME CG6028 OS=Drosophila melanogaster GN=CG6028 PE=1 SV=1	2	2
TRUE	Contr / Rep	Contr	Rep	18	A0A0B4LGQ1;Q00637	23517.6	18631.3	-0.336012	0.336012	-20.7772	0.792228	0	0.00134977	0.00120242	17	0.125798	A0A0B4LGQ1;Q00637,Q00637	A0A0B4LGQ1_DROME;SODM_DROME,SODM_DROME	Superoxide dismutase;Superoxide dismutase [Mn], mitochondrial,Superoxide dismutase [Mn], mitochondrial	Sod2	A0A0B4LGQ1;Q00637,Q00637	Drosophila melanogaster	tr;sp,sp		3;2,2	1;3,3	uniprot-drosophila_reviewed_unreviewed_0825_2016	>tr|A0A0B4LGQ1|A0A0B4LGQ1_DROME Superoxide dismutase OS=Drosophila melanogaster GN=Sod2 PE=3 SV=1;>sp|Q00637|SODM_DROME Superoxide dismutase [Mn], mitochondrial OS=Drosophila melanogaster GN=Sod2 PE=2 SV=3,>sp|Q00637|SODM_DROME Superoxide dismutase [Mn], mitochondrial OS=Drosophila melanogaster GN=Sod2 PE=2 SV=3	3	3
TRUE	Contr / Rep	Contr	Rep	6	Q24253	17.6011	7.51915	-1.22703	1.22703	-57.2803	0.427197	0	0.00135587	0.0012026	5	0.213093	Q24253	Q24253_DROME	AP complex subunit beta	AP-1-2beta	Q24253	Drosophila melanogaster	tr		1	1	uniprot-drosophila_reviewed_unreviewed_0825_2016	>tr|Q24253|Q24253_DROME AP complex subunit beta OS=Drosophila melanogaster GN=AP-1-2beta PE=1 SV=1	1	1
TRUE	Contr / Rep	Contr	Rep	35	Q8SXC3;Q9VP02	677.875	1738.97	1.35914	1.35914	156.532	2.56532	0	0.0013849	0.00122303	34	0.298095	Q8SXC3;Q9VP02	Q8SXC3_DROME;Q9VP02_DROME	Aldose 1-epimerase	BcDNA:GH08902;CG32444	Q8SXC3;Q9VP02	Drosophila melanogaster	tr		2;1	1;3	uniprot-drosophila_reviewed_unreviewed_0825_2016	>tr|Q8SXC3|Q8SXC3_DROME Aldose 1-epimerase OS=Drosophila melanogaster GN=BcDNA:GH08902 PE=2 SV=1;>tr|Q9VP02|Q9VP02_DROME Aldose 1-epimerase OS=Drosophila melanogaster GN=CG32444 PE=1 SV=3	6	9
TRUE	Contr / Rep	Contr	Rep	48	E1JIJ5;P31409	3448.84	3012.59	-0.195103	0.195103	-12.649	0.87351	0	0.0015171	0.0013226	47	0.0735582	E1JIJ5;P31409,P31409	E1JIJ5_DROME;VATB_DROME,VATB_DROME	Vacuolar H[+]-ATPase 55kD subunit, isoform C;V-type proton ATPase subunit B,V-type proton ATPase subunit B	Vha55	E1JIJ5;P31409,P31409	Drosophila melanogaster	tr;sp,sp		1;2,2	1	uniprot-drosophila_reviewed_unreviewed_0825_2016	>tr|E1JIJ5|E1JIJ5_DROME Vacuolar H[+]-ATPase 55kD subunit, isoform C OS=Drosophila melanogaster GN=Vha55 PE=1 SV=1;>sp|P31409|VATB_DROME V-type proton ATPase subunit B OS=Drosophila melanogaster GN=Vha55 PE=2 SV=1,>sp|P31409|VATB_DROME V-type proton ATPase subunit B OS=Drosophila melanogaster GN=Vha55 PE=2 SV=1	7	8
TRUE	Contr / Rep	Contr	Rep	6	P48148;Q9QUI0	30.5686	14.4355	-1.08243	1.08243	-52.7768	0.472232	0	0.00151208	0.0013226	5	0.182319	P48148,P48148;Q9QUI0	RHO1_DROME,RHO1_DROME;RHOA_MOUSE	Ras-like GTP-binding protein Rho1,Ras-like GTP-binding protein Rho1;Transforming protein RhoA	Rho1,Rho1;Rhoa	P48148,P48148;Q9QUI0	Drosophila melanogaster,Drosophila melanogaster;Mus musculus	sp		1	1	uniprot-drosophila_reviewed_unreviewed_0825_2016	>sp|P48148|RHO1_DROME Ras-like GTP-binding protein Rho1 OS=Drosophila melanogaster GN=Rho1 PE=1 SV=1,>sp|P48148|RHO1_DROME Ras-like GTP-binding protein Rho1 OS=Drosophila melanogaster GN=Rho1 PE=1 SV=1;>sp|Q9QUI0|RHOA_MOUSE Transforming protein RhoA OS=Mus musculus GN=Rhoa PE=1 SV=1	1	1
TRUE	Contr / Rep	Contr	Rep	12	A0A0B4K6N1;Q8MLY8	797.992	544.528	-0.551369	0.551369	-31.7628	0.682372	0	0.00151274	0.0013226	11	0.115971	A0A0B4K6N1;Q8MLY8,Q8MLY8	A0A0B4K6N1_DROME;RS8_DROME,RS8_DROME	40S ribosomal protein S8	RpS8	A0A0B4K6N1;Q8MLY8,Q8MLY8	Drosophila melanogaster	tr;sp,sp		3;1,1	1	uniprot-drosophila_reviewed_unreviewed_0825_2016	>tr|A0A0B4K6N1|A0A0B4K6N1_DROME 40S ribosomal protein S8 OS=Drosophila melanogaster GN=RpS8 PE=3 SV=1;>sp|Q8MLY8|RS8_DROME 40S ribosomal protein S8 OS=Drosophila melanogaster GN=RpS8 PE=1 SV=1,>sp|Q8MLY8|RS8_DROME 40S ribosomal protein S8 OS=Drosophila melanogaster GN=RpS8 PE=1 SV=1	2	2
TRUE	Contr / Rep	Contr	Rep	6	D3PFE0;M9NEA7;M9NEY9;M9NG31;P18169;P18170;P18171	59.3092	16.2822	-1.86496	1.86496	-72.5469	0.274531	0	0.001569	0.00136203	5	0.316574	D3PFE0;M9NEA7;M9NEY9;M9NG31;P18169,P18169;P18170,P18170;P18171,P18171	D3PFE0_DROME;M9NEA7_DROME;M9NEY9_DROME;M9NG31_DROME;DEC11_DROME,DEC11_DROME;DEC12_DROME,DEC12_DROME;DEC13_DROME,DEC13_DROME	MIP16878p (Fragment);Defective chorion 1, isoform E;Defective chorion 1, isoform F;Defective chorion 1, isoform G;Defective chorion-1 protein, FC125 isoform,Defective chorion-1 protein, FC125 isoform;Defective chorion-1 protein, FC106 isoform,Defective chorion-1 protein, FC106 isoform;Defective chorion-1 protein, FC177 isoform,Defective chorion-1 protein, FC177 isoform	dec-1-RC;dec-1;dec-1;dec-1;dec-1,dec-1;dec-1,dec-1;dec-1,dec-1	D3PFE0;M9NEA7;M9NEY9;M9NG31;P18169,P18169;P18170,P18170;P18171,P18171	Drosophila melanogaster	tr;tr;tr;tr;sp,sp;sp,sp;sp,sp		2;1;1;1;2,2;1,1;2,2	1;1;1;1;2,2;2,2;2,2	uniprot-drosophila_reviewed_unreviewed_0825_2016	>tr|D3PFE0|D3PFE0_DROME MIP16878p (Fragment) OS=Drosophila melanogaster GN=dec-1-RC PE=2 SV=1;>tr|M9NEA7|M9NEA7_DROME Defective chorion 1, isoform E OS=Drosophila melanogaster GN=dec-1 PE=1 SV=1;>tr|M9NEY9|M9NEY9_DROME Defective chorion 1, isoform F OS=Drosophila melanogaster GN=dec-1 PE=1 SV=1;>tr|M9NG31|M9NG31_DROME Defective chorion 1, isoform G OS=Drosophila melanogaster GN=dec-1 PE=1 SV=1;>s…	1	1
TRUE	Contr / Rep	Contr	Rep	18	A0A0B4K7G4;P13469	223.432	106.156	-1.07365	1.07365	-52.4883	0.475117	0	0.00157588	0.0013622	17	0.202635	A0A0B4K7G4;P13469,P13469	A0A0B4K7G4_DROME;MODU_DROME,MODU_DROME	Modulo, isoform C;DNA-binding protein modulo,DNA-binding protein modulo	mod	A0A0B4K7G4;P13469,P13469	Drosophila melanogaster	tr;sp,sp		1	1;2,2	uniprot-drosophila_reviewed_unreviewed_0825_2016	>tr|A0A0B4K7G4|A0A0B4K7G4_DROME Modulo, isoform C OS=Drosophila melanogaster GN=mod PE=1 SV=1;>sp|P13469|MODU_DROME DNA-binding protein modulo OS=Drosophila melanogaster GN=mod PE=1 SV=2,>sp|P13469|MODU_DROME DNA-binding protein modulo OS=Drosophila melanogaster GN=mod PE=1 SV=2	3	3
TRUE	Contr / Rep	Contr	Rep	18	A1ZB68	553.515	864.114	0.642599	0.642599	56.1139	1.56114	0	0.00158528	0.00136455	17	0.12447	A1ZB68	A1ZB68_DROME	FI01423p	GstE3	A1ZB68	Drosophila melanogaster	tr		1	1	uniprot-drosophila_reviewed_unreviewed_0825_2016	>tr|A1ZB68|A1ZB68_DROME FI01423p OS=Drosophila melanogaster GN=GstE3 PE=1 SV=1	3	5
TRUE	Contr / Rep	Contr	Rep	19	Q8MSW0	75.8401	28.0049	-1.43728	1.43728	-63.0737	0.369263	0	0.00167815	0.00143841	18	0.168345	Q8MSW0	Q8MSW0_DROME	Isoleucyl-tRNA synthetase, isoform A	IleRS	Q8MSW0	Drosophila melanogaster	tr		1	1	uniprot-drosophila_reviewed_unreviewed_0825_2016	>tr|Q8MSW0|Q8MSW0_DROME Isoleucyl-tRNA synthetase, isoform A OS=Drosophila melanogaster GN=IleRS PE=1 SV=1	4	4
TRUE	Contr / Rep	Contr	Rep	6	B6IDT0;P41094	526.223	153.904	-1.77364	1.77364	-70.7531	0.292469	0	0.00172865	0.0014755	5	0.304187	B6IDT0;P41094,P41094	B6IDT0_DROME;RS18_DROME,RS18_DROME	FI09342p (Fragment);40S ribosomal protein S18,40S ribosomal protein S18	RpS18-RB;RpS18,RpS18	B6IDT0;P41094,P41094	Drosophila melanogaster	tr;sp,sp		2;1,1	1	uniprot-drosophila_reviewed_unreviewed_0825_2016	>tr|B6IDT0|B6IDT0_DROME FI09342p (Fragment) OS=Drosophila melanogaster GN=RpS18-RB PE=2 SV=1;>sp|P41094|RS18_DROME 40S ribosomal protein S18 OS=Drosophila melanogaster GN=RpS18 PE=1 SV=1,>sp|P41094|RS18_DROME 40S ribosomal protein S18 OS=Drosophila melanogaster GN=RpS18 PE=1 SV=1	1	1
TRUE	Contr / Rep	Contr	Rep	30	Q961W1;Q9VPF3	3703.01	5221.19	0.495678	0.495678	40.9984	1.40998	0	0.00175663	0.00149313	29	0.118158	Q961W1;Q9VPF3	Q961W1_DROME;Q9VPF3_DROME	4-hydroxyphenylpyruvate dioxygenase	CG11796	Q961W1;Q9VPF3	Drosophila melanogaster	tr		1	1	uniprot-drosophila_reviewed_unreviewed_0825_2016	>tr|Q961W1|Q961W1_DROME 4-hydroxyphenylpyruvate dioxygenase OS=Drosophila melanogaster GN=CG11796 PE=1 SV=1;>tr|Q9VPF3|Q9VPF3_DROME 4-hydroxyphenylpyruvate dioxygenase OS=Drosophila melanogaster GN=CG11796 PE=1 SV=1	4	6
TRUE	Contr / Rep	Contr	Rep	12	O76742	279.025	182.692	-0.610979	0.610979	-34.5248	0.654752	0	0.00176958	0.0014979	11	0.122559	O76742	O76742_DROME	CG5915 protein	Rab7	O76742	Drosophila melanogaster	tr		1	1	uniprot-drosophila_reviewed_unreviewed_0825_2016	>tr|O76742|O76742_DROME CG5915 protein OS=Drosophila melanogaster GN=Rab7 PE=1 SV=1	2	2
TRUE	Contr / Rep	Contr	Rep	36	Q9VLB7	3468.27	3075.24	-0.173515	0.173515	-11.332	0.88668	0	0.00179614	0.0015141	35	0.107645	Q9VLB7	Q9VLB7_DROME	GDP dissociation inhibitor, isoform A	Gdi	Q9VLB7	Drosophila melanogaster	tr		1	1	uniprot-drosophila_reviewed_unreviewed_0825_2016	>tr|Q9VLB7|Q9VLB7_DROME GDP dissociation inhibitor, isoform A OS=Drosophila melanogaster GN=Gdi PE=1 SV=1	6	6
TRUE	Contr / Rep	Contr	Rep	24	Q9U1I4;Q9VFC2	533.606	603.304	0.17711	0.17711	13.0617	1.13062	0	0.00183361	0.00153932	23	0.0484694	Q9U1I4;Q9VFC2	Q9U1I4_DROME;Q9VFC2_DROME	Serine protease inhibitor (Serpin-5);GH14439p	Spn88Ea	Q9U1I4;Q9VFC2	Drosophila melanogaster	tr		2;1	1	uniprot-drosophila_reviewed_unreviewed_0825_2016	>tr|Q9U1I4|Q9U1I4_DROME Serine protease inhibitor (Serpin-5) OS=Drosophila melanogaster GN=Spn88Ea PE=2 SV=1;>tr|Q9VFC2|Q9VFC2_DROME GH14439p OS=Drosophila melanogaster GN=Spn88Ea PE=1 SV=1	4	4
TRUE	Contr / Rep	Contr	Rep	6	Q9VMR9	72.3412	28.8167	-1.32791	1.32791	-60.1656	0.398344	0	0.00187993	0.00157175	5	0.235245	Q9VMR9	Q9VMR9_DROME	RH62365p	CG14022	Q9VMR9	Drosophila melanogaster	tr		2	1	uniprot-drosophila_reviewed_unreviewed_0825_2016	>tr|Q9VMR9|Q9VMR9_DROME RH62365p OS=Drosophila melanogaster GN=CG14022 PE=2 SV=1	1	1
TRUE	Contr / Rep	Contr	Rep	84	E4NKM3;H5V866;Q9VQ61	18332.1	23397	0.35195	0.35195	27.6285	1.27628	0	0.00211357	0.00175272	83	0.086843	E4NKM3;H5V866;Q9VQ61	E4NKM3_DROME;H5V866_DROME;Q9VQ61_DROME	Aspartate aminotransferase (Fragment);Aspartate aminotransferase (Fragment);Aspartate aminotransferase	Got2-RA;Got2-RA;Got2	E4NKM3;H5V866;Q9VQ61	Drosophila melanogaster	tr		2;2;1	1	uniprot-drosophila_reviewed_unreviewed_0825_2016	>tr|E4NKM3|E4NKM3_DROME Aspartate aminotransferase (Fragment) OS=Drosophila melanogaster GN=Got2-RA PE=2 SV=1;>tr|H5V866|H5V866_DROME Aspartate aminotransferase (Fragment) OS=Drosophila melanogaster GN=Got2-RA PE=2 SV=1;>tr|Q9VQ61|Q9VQ61_DROME Aspartate aminotransferase OS=Drosophila melanogaster GN=Got2 PE=1 SV=1	10	14
TRUE	Contr / Rep	Contr	Rep	6	Q7KML7;Q9Y136	5.33822	30.8197	2.52942	2.52942	477.34	5.7734	0	0.00210623	0.00175272	5	0.500084	Q7KML7;Q9Y136	Q7KML7_DROME;Q9Y136_DROME	BcDNA.GH07188;Uncharacterized protein	BcDNA.GH07188;CG14526	Q7KML7;Q9Y136	Drosophila melanogaster	tr		2;1	1;2	uniprot-drosophila_reviewed_unreviewed_0825_2016	>tr|Q7KML7|Q7KML7_DROME BcDNA.GH07188 OS=Drosophila melanogaster GN=BcDNA.GH07188 PE=2 SV=1;>tr|Q9Y136|Q9Y136_DROME Uncharacterized protein OS=Drosophila melanogaster GN=CG14526 PE=1 SV=2	1	1
TRUE	Contr / Rep	Contr	Rep	12	Q8I0S9;Q9V9T5	58.5016	34.7468	-0.751595	0.751595	-40.6054	0.593946	0	0.00213245	0.00176121	11	0.269647	Q8I0S9;Q9V9T5	Q8I0S9_DROME;Q9V9T5_DROME	CG2118, isoform B;CG2118, isoform A	CG2118	Q8I0S9;Q9V9T5	Drosophila melanogaster	tr		1	1;2	uniprot-drosophila_reviewed_unreviewed_0825_2016	>tr|Q8I0S9|Q8I0S9_DROME CG2118, isoform B OS=Drosophila melanogaster GN=CG2118 PE=1 SV=1;>tr|Q9V9T5|Q9V9T5_DROME CG2118, isoform A OS=Drosophila melanogaster GN=CG2118 PE=1 SV=2	2	2
TRUE	Contr / Rep	Contr	Rep	12	Q9VW54	81.6583	34.7939	-1.23076	1.23076	-57.3908	0.426092	0	0.00219381	0.00180459	11	0.494443	Q9VW54	Q9VW54_DROME	26S proteasome regulatory complex subunit p97	Rpn1	Q9VW54	Drosophila melanogaster	tr		1	2	uniprot-drosophila_reviewed_unreviewed_0825_2016	>tr|Q9VW54|Q9VW54_DROME 26S proteasome regulatory complex subunit p97 OS=Drosophila melanogaster GN=Rpn1 PE=1 SV=2	2	2
TRUE	Contr / Rep	Contr	Rep	12	Q7KMM4	64.8487	95.9235	0.564806	0.564806	47.9188	1.47919	0	0.00229221	0.00187796	11	0.130813	Q7KMM4	Q7KMM4_DROME	BcDNA.GH04962	GCS2alpha	Q7KMM4	Drosophila melanogaster	tr		1	1	uniprot-drosophila_reviewed_unreviewed_0825_2016	>tr|Q7KMM4|Q7KMM4_DROME BcDNA.GH04962 OS=Drosophila melanogaster GN=GCS2alpha PE=1 SV=1	2	2
TRUE	Contr / Rep	Contr	Rep	30	Q27580;X2JF40	3591.68	3161.2	-0.184187	0.184187	-11.9855	0.880145	0	0.00233781	0.00190765	29	0.128199	Q27580,Q27580;X2JF40	SAHH_DROME,SAHH_DROME;X2JF40_DROME	Adenosylhomocysteinase	Ahcy13	Q27580,Q27580;X2JF40	Drosophila melanogaster	sp,sp;tr		2,2;3	2,2;1	uniprot-drosophila_reviewed_unreviewed_0825_2016	>sp|Q27580|SAHH_DROME Adenosylhomocysteinase OS=Drosophila melanogaster GN=Ahcy13 PE=2 SV=2,>sp|Q27580|SAHH_DROME Adenosylhomocysteinase OS=Drosophila melanogaster GN=Ahcy13 PE=2 SV=2;>tr|X2JF40|X2JF40_DROME Adenosylhomocysteinase OS=Drosophila melanogaster GN=Ahcy13 PE=3 SV=1	4	5
TRUE	Contr / Rep	Contr	Rep	6	Q9VKM7;Q9VKM8	63.2416	15.2635	-2.05079	2.05079	-75.8648	0.241352	0	0.00237246	0.00192822	5	0.357684	Q9VKM7;Q9VKM8	Q9VKM7_DROME;Q9VKM8_DROME	AT01533p;RH51633p	CG6089;CG33129	Q9VKM7;Q9VKM8	Drosophila melanogaster	tr		1	2;1	uniprot-drosophila_reviewed_unreviewed_0825_2016	>tr|Q9VKM7|Q9VKM7_DROME AT01533p OS=Drosophila melanogaster GN=CG6089 PE=1 SV=2;>tr|Q9VKM8|Q9VKM8_DROME RH51633p OS=Drosophila melanogaster GN=CG33129 PE=1 SV=1	1	1
TRUE	Contr / Rep	Contr	Rep	24	Q7K3J0	1030.47	776.496	-0.408254	0.408254	-24.6465	0.753535	0	0.00250176	0.00202523	23	0.087913	Q7K3J0	Q7K3J0_DROME	CG8258	CG8258	Q7K3J0	Drosophila melanogaster	tr		1	1	uniprot-drosophila_reviewed_unreviewed_0825_2016	>tr|Q7K3J0|Q7K3J0_DROME CG8258 OS=Drosophila melanogaster GN=CG8258 PE=1 SV=1	4	4
TRUE	Contr / Rep	Contr	Rep	12	Q7KTW5	723.691	958.964	0.406102	0.406102	32.51	1.3251	0	0.00251315	0.00202641	11	0.132986	Q7KTW5	Q7KTW5_DROME	CG9391, isoform A	CG9391	Q7KTW5	Drosophila melanogaster	tr		1	1	uniprot-drosophila_reviewed_unreviewed_0825_2016	>tr|Q7KTW5|Q7KTW5_DROME CG9391, isoform A OS=Drosophila melanogaster GN=CG9391 PE=1 SV=1	2	2
TRUE	Contr / Rep	Contr	Rep	6	Q9VB05	58.9644	49.6392	-0.248366	0.248366	-15.815	0.84185	0	0.00256902	0.00206331	5	0.0439161	Q9VB05	Q9VB05_DROME	ALG-2 interacting protein X	ALiX	Q9VB05	Drosophila melanogaster	tr		1	1	uniprot-drosophila_reviewed_unreviewed_0825_2016	>tr|Q9VB05|Q9VB05_DROME ALG-2 interacting protein X OS=Drosophila melanogaster GN=ALiX PE=1 SV=1	1	1
TRUE	Contr / Rep	Contr	Rep	6	A0A0B4K624;A0A0B4K6A3;A0A0B4K6K1;A0A0B4K6T7;C7LAE4;E1JJ68;I0B1P2;P19109	33.2462	13.7219	-1.27671	1.27671	-58.7264	0.412736	0	0.00262078	0.00209663	5	0.238866	A0A0B4K624;A0A0B4K6A3;A0A0B4K6K1;A0A0B4K6T7;C7LAE4;E1JJ68;I0B1P2;P19109,P19109	A0A0B4K624_DROME;A0A0B4K6A3_DROME;A0A0B4K6K1_DROME;A0A0B4K6T7_DROME;C7LAE4_DROME;E1JJ68_DROME;I0B1P2_DROME;DDX17_DROME,DDX17_DROME	Rm62, isoform J;Rm62, isoform L;Rm62, isoform M;Rm62, isoform K;LP18603p;Rm62, isoform H;MIP33508p1 (Fragment);ATP-dependent RNA helicase p62,ATP-dependent RNA helicase p62	Rm62;Rm62;Rm62;Rm62;Rm62;Rm62;Rm62-RB;Rm62,Rm62	A0A0B4K624;A0A0B4K6A3;A0A0B4K6K1;A0A0B4K6T7;C7LAE4;E1JJ68;I0B1P2;P19109,P19109	Drosophila melanogaster	tr;tr;tr;tr;tr;tr;tr;sp,sp		1;1;1;1;1;1;2;1,1	1;1;1;1;1;1;1;3,3	uniprot-drosophila_reviewed_unreviewed_0825_2016	>tr|A0A0B4K624|A0A0B4K624_DROME Rm62, isoform J OS=Drosophila melanogaster GN=Rm62 PE=1 SV=1;>tr|A0A0B4K6A3|A0A0B4K6A3_DROME Rm62, isoform L OS=Drosophila melanogaster GN=Rm62 PE=1 SV=1;>tr|A0A0B4K6K1|A0A0B4K6K1_DROME Rm62, isoform M OS=Drosophila melanogaster GN=Rm62 PE=1 SV=1;>tr|A0A0B4K6T7|A0A0B4K6T7_DROME Rm62, isoform K OS=Drosophila melanogaster GN=Rm62 PE=1 SV=1;>tr|C7LAE4|C7LAE4_DROME LP1…	1	1
TRUE	Contr / Rep	Contr	Rep	12	B1PH59;B1PH60;B1PH63;B1PH76;B1PH90;B1PH93;B1PH97;B1PHA3;B1PHA6;B1PHA7;B1PHA8;B1PHB1;B1PHB3;B1PHB4;B1PHB6;B1PHB9;C9QPE7;Q9VM19	196.141	306.481	0.643903	0.643903	56.255	1.56255	0	0.002796	0.00222806	11	0.16246	B1PH59;B1PH60;B1PH63;B1PH76;B1PH90;B1PH93;B1PH97;B1PHA3;B1PHA6;B1PHA7;B1PHA8;B1PHB1;B1PHB3;B1PHB4;B1PHB6;B1PHB9;C9QPE7;Q9VM19	B1PH59_DROME;B1PH60_DROME;B1PH63_DROME;B1PH76_DROME;B1PH90_DROME;B1PH93_DROME;B1PH97_DROME;B1PHA3_DROME;B1PHA6_DROME;B1PHA7_DROME;B1PHA8_DROME;B1PHB1_DROME;B1PHB3_DROME;B1PHB4_DROME;B1PHB6_DROME;B1PHB9_DROME;C9QPE7_DROME;Q9VM19_DROME	Trehalose 6-phosphate phosphatase (Fragment);Trehalose 6-phosphate phosphatase (Fragment);Trehalose 6-phosphate phosphatase (Fragment);Trehalose 6-phosphate phosphatase (Fragment);Trehalose 6-phosphate phosphatase (Fragment);Trehalose 6-phosphate phosphatase (Fragment);Trehalose 6-phosphate phosphatase (Fragment);Trehalose 6-phosphate phosphatase (Fragment);Trehalose 6-phosphate phosphatase (Frag…	CG5171;CG5171;CG5171;CG5171;CG5171;CG5171;CG5171;CG5171;CG5171;CG5171;CG5171;CG5171;CG5171;CG5171;CG5171;CG5171;CG5171-RC;CG5171	B1PH59;B1PH60;B1PH63;B1PH76;B1PH90;B1PH93;B1PH97;B1PHA3;B1PHA6;B1PHA7;B1PHA8;B1PHB1;B1PHB3;B1PHB4;B1PHB6;B1PHB9;C9QPE7;Q9VM19	Drosophila melanogaster	tr		3;3;3;3;3;3;3;3;3;3;3;3;3;3;3;3;1;1	1	uniprot-drosophila_reviewed_unreviewed_0825_2016	>tr|B1PH59|B1PH59_DROME Trehalose 6-phosphate phosphatase (Fragment) OS=Drosophila melanogaster GN=CG5171 PE=3 SV=1;>tr|B1PH60|B1PH60_DROME Trehalose 6-phosphate phosphatase (Fragment) OS=Drosophila melanogaster GN=CG5171 PE=3 SV=1;>tr|B1PH63|B1PH63_DROME Trehalose 6-phosphate phosphatase (Fragment) OS=Drosophila melanogaster GN=CG5171 PE=3 SV=1;>tr|B1PH76|B1PH76_DROME Trehalose 6-phosphate phosp…	1	2
TRUE	Contr / Rep	Contr	Rep	12	B7FNK0;P12646;Q27638	687.922	1179.31	0.777622	0.777622	71.4303	1.7143	0	0.0029699	0.00235743	11	0.126228	B7FNK0;P12646,P12646;Q27638	B7FNK0_DROME;G6PD_DROME,G6PD_DROME;G6PD_DROYA	Glucose-6-phosphate 1-dehydrogenase;Glucose-6-phosphate 1-dehydrogenase,Glucose-6-phosphate 1-dehydrogenase;Glucose-6-phosphate 1-dehydrogenase (Fragment)	Zw-RA;Zw,Zw;Zw	B7FNK0;P12646,P12646;Q27638	Drosophila melanogaster;Drosophila melanogaster,Drosophila melanogaster;Drosophila yakuba	tr;sp,sp;sp		2;1,1;3	1;2,2;1	uniprot-drosophila_reviewed_unreviewed_0825_2016	>tr|B7FNK0|B7FNK0_DROME Glucose-6-phosphate 1-dehydrogenase OS=Drosophila melanogaster GN=Zw-RA PE=2 SV=1;>sp|P12646|G6PD_DROME Glucose-6-phosphate 1-dehydrogenase OS=Drosophila melanogaster GN=Zw PE=1 SV=2,>sp|P12646|G6PD_DROME Glucose-6-phosphate 1-dehydrogenase OS=Drosophila melanogaster GN=Zw PE=1 SV=2;>sp|Q27638|G6PD_DROYA Glucose-6-phosphate 1-dehydrogenase (Fragment) OS=Drosophila yakuba G…	2	2
TRUE	Contr / Rep	Contr	Rep	42	P61851;P61852;P61853;P61854	29356.7	27447.8	-0.0969943	0.0969943	-6.50211	0.934979	0	0.00300457	0.0023757	41	0.0732767	P61851,P61851;P61852;P61853;P61854	SODC_DROME,SODC_DROME;SODC_DROSI;SODC_DROMA;SODC_DROSE	Superoxide dismutase [Cu-Zn]	Sod	P61851,P61851;P61852;P61853;P61854	Drosophila melanogaster,Drosophila melanogaster;Drosophila simulans;Drosophila mauritiana;Drosophila sechellia	sp		1,1;3;3;3	2	uniprot-drosophila_reviewed_unreviewed_0825_2016	>sp|P61851|SODC_DROME Superoxide dismutase [Cu-Zn] OS=Drosophila melanogaster GN=Sod PE=1 SV=2,>sp|P61851|SODC_DROME Superoxide dismutase [Cu-Zn] OS=Drosophila melanogaster GN=Sod PE=1 SV=2;>sp|P61852|SODC_DROSI Superoxide dismutase [Cu-Zn] OS=Drosophila simulans GN=Sod PE=3 SV=2;>sp|P61853|SODC_DROMA Superoxide dismutase [Cu-Zn] OS=Drosophila mauritiana GN=Sod PE=3 SV=2;>sp|P61854|SODC_DROSE Sup…	7	8
TRUE	Contr / Rep	Contr	Rep	6	A0A0B4K6U6;Q08473	607.789	410.486	-0.566236	0.566236	-32.4623	0.675377	0	0.00312683	0.00246283	5	0.106847	A0A0B4K6U6;Q08473,Q08473	A0A0B4K6U6_DROME;SQD_DROME,SQD_DROME	Squid, isoform E;RNA-binding protein squid,RNA-binding protein squid	sqd	A0A0B4K6U6;Q08473,Q08473	Drosophila melanogaster	tr;sp,sp		4;1,1	1;3,3	uniprot-drosophila_reviewed_unreviewed_0825_2016	>tr|A0A0B4K6U6|A0A0B4K6U6_DROME Squid, isoform E OS=Drosophila melanogaster GN=sqd PE=4 SV=1;>sp|Q08473|SQD_DROME RNA-binding protein squid OS=Drosophila melanogaster GN=sqd PE=1 SV=3,>sp|Q08473|SQD_DROME RNA-binding protein squid OS=Drosophila melanogaster GN=sqd PE=1 SV=3	1	1
TRUE	Contr / Rep	Contr	Rep	6	A0A0B4K683;P46782;Q24186;Q9VFE4;X2JKU5	56.6579	19.0141	-1.5752	1.5752	-66.4404	0.335596	0	0.00324009	0.00254222	5	0.309097	A0A0B4K683;P46782;Q24186,Q24186;Q9VFE4,Q9VFE4;X2JKU5	A0A0B4K683_DROME;RS5_HUMAN;RS5A_DROME,RS5A_DROME;RS5B_DROME,RS5B_DROME;X2JKU5_DROME	Ribosomal protein S5b, isoform B;40S ribosomal protein S5;40S ribosomal protein S5a,40S ribosomal protein S5a;40S ribosomal protein S5b,40S ribosomal protein S5b;Ribosomal protein S5a, isoform B	RpS5b;RPS5;RpS5a,RpS5a;RpS5b,RpS5b;RpS5a	A0A0B4K683;P46782;Q24186,Q24186;Q9VFE4,Q9VFE4;X2JKU5	Drosophila melanogaster;Homo sapiens;Drosophila melanogaster,Drosophila melanogaster;Drosophila melanogaster,Drosophila melanogaster;Drosophila melanogaster	tr;sp;sp,sp;sp,sp;tr		3;1;1,1;2,2;3	1;4;1,1;1,1;1	uniprot-drosophila_reviewed_unreviewed_0825_2016	>tr|A0A0B4K683|A0A0B4K683_DROME Ribosomal protein S5b, isoform B OS=Drosophila melanogaster GN=RpS5b PE=3 SV=1;>sp|P46782|RS5_HUMAN 40S ribosomal protein S5 OS=Homo sapiens GN=RPS5 PE=1 SV=4;>sp|Q24186|RS5A_DROME 40S ribosomal protein S5a OS=Drosophila melanogaster GN=RpS5a PE=1 SV=1,>sp|Q24186|RS5A_DROME 40S ribosomal protein S5a OS=Drosophila melanogaster GN=RpS5a PE=1 SV=1;>sp|Q9VFE4|RS5B_DROM…	1	1
TRUE	Contr / Rep	Contr	Rep	12	P07486	196.381	112.087	-0.809038	0.809038	-42.9238	0.570762	0	0.00325616	0.00254504	11	0.210924	P07486	G3P1_DROME	Glyceraldehyde-3-phosphate dehydrogenase 1	Gapdh1	P07486	Drosophila melanogaster	sp		2	2	uniprot-drosophila_reviewed_unreviewed_0825_2016	>sp|P07486|G3P1_DROME Glyceraldehyde-3-phosphate dehydrogenase 1 OS=Drosophila melanogaster GN=Gapdh1 PE=2 SV=2,>sp|P07486|G3P1_DROME Glyceraldehyde-3-phosphate dehydrogenase 1 OS=Drosophila melanogaster GN=Gapdh1 PE=2 SV=2	2	2
TRUE	Contr / Rep	Contr	Rep	6	O61540;Q9VL89	55.9454	33.25	-0.750664	0.750664	-40.567	0.59433	0	0.00327426	0.00254942	5	0.146238	O61540;Q9VL89	O61540_DROME;Q9VL89_DROME	Methionine aminopeptidase 2	und	O61540;Q9VL89	Drosophila melanogaster	tr		2;1	1	uniprot-drosophila_reviewed_unreviewed_0825_2016	>tr|O61540|O61540_DROME Methionine aminopeptidase 2 OS=Drosophila melanogaster GN=und PE=2 SV=1;>tr|Q9VL89|Q9VL89_DROME Methionine aminopeptidase 2 OS=Drosophila melanogaster GN=und PE=1 SV=1	1	1
TRUE	Contr / Rep	Contr	Rep	66	M9NFH8;Q9VVA4	1128.48	1498.26	0.408907	0.408907	32.7679	1.32768	0	0.0033248	0.00257666	65	0.0802494	M9NFH8;Q9VVA4	M9NFH8_DROME;Q9VVA4_DROME	CG9674, isoform F;CG9674, isoform A	CG9674	M9NFH8;Q9VVA4	Drosophila melanogaster	tr		1	1;2	uniprot-drosophila_reviewed_unreviewed_0825_2016	>tr|M9NFH8|M9NFH8_DROME CG9674, isoform F OS=Drosophila melanogaster GN=CG9674 PE=1 SV=1;>tr|Q9VVA4|Q9VVA4_DROME CG9674, isoform A OS=Drosophila melanogaster GN=CG9674 PE=1 SV=2	9	11
TRUE	Contr / Rep	Contr	Rep	11	Q9W0J9	736.183	977.298	0.408733	0.408733	32.752	1.32752	0	0.0033345	0.00257666	10	0.254054	Q9W0J9	Q9W0J9_DROME	CG9119	CG9119	Q9W0J9	Drosophila melanogaster	tr		1	1	uniprot-drosophila_reviewed_unreviewed_0825_2016	>tr|Q9W0J9|Q9W0J9_DROME CG9119 OS=Drosophila melanogaster GN=CG9119 PE=1 SV=1	2	2
TRUE	Contr / Rep	Contr	Rep	6	Q6V6U1;Q6V6U2;Q6V6U3;Q6V6U4;Q6V6U5;Q6V6U6;Q6V6U7;Q6V6U8;Q6V6U9;Q6V6V0;Q7JWX3;Q9U5W7	21.7767	50.4928	1.21329	1.21329	131.866	2.31866	0	0.00336206	0.00258815	5	0.222285	Q6V6U1;Q6V6U2;Q6V6U3;Q6V6U4;Q6V6U5;Q6V6U6;Q6V6U7;Q6V6U8;Q6V6U9;Q6V6V0;Q7JWX3;Q9U5W7	Q6V6U1_DROME;Q6V6U2_DROME;Q6V6U3_DROME;Q6V6U4_DROME;Q6V6U5_DROME;Q6V6U6_DROME;Q6V6U7_DROME;Q6V6U8_DROME;Q6V6U9_DROME;Q6V6V0_DROME;Q7JWX3_DROME;Q9U5W7_DROME	Spn43Ac (Fragment);Spn43Ac (Fragment);Spn43Ac (Fragment);Spn43Ac (Fragment);Spn43Ac (Fragment);Spn43Ac (Fragment);Spn43Ac (Fragment);Spn43Ac (Fragment);Spn43Ac (Fragment);Spn43Ac (Fragment);GH10112p;Serpin, putative	nec	Q6V6U1;Q6V6U2;Q6V6U3;Q6V6U4;Q6V6U5;Q6V6U6;Q6V6U7;Q6V6U8;Q6V6U9;Q6V6V0;Q7JWX3;Q9U5W7	Drosophila melanogaster	tr		3;3;3;3;3;3;3;3;3;3;1;2	1	uniprot-drosophila_reviewed_unreviewed_0825_2016	>tr|Q6V6U1|Q6V6U1_DROME Spn43Ac (Fragment) OS=Drosophila melanogaster GN=nec PE=3 SV=1;>tr|Q6V6U2|Q6V6U2_DROME Spn43Ac (Fragment) OS=Drosophila melanogaster GN=nec PE=3 SV=1;>tr|Q6V6U3|Q6V6U3_DROME Spn43Ac (Fragment) OS=Drosophila melanogaster GN=nec PE=3 SV=1;>tr|Q6V6U4|Q6V6U4_DROME Spn43Ac (Fragment) OS=Drosophila melanogaster GN=nec PE=3 SV=1;>tr|Q6V6U5|Q6V6U5_DROME Spn43Ac (Fragment) OS=Droso…	1	1
TRUE	Contr / Rep	Contr	Rep	12	Q9XZ61	60.0532	27.9842	-1.10163	1.10163	-53.401	0.46599	0	0.00341261	0.00261719	11	0.308696	Q9XZ61	Q9XZ61_DROME	Ubiquitin carboxyl-terminal hydrolase	Uch-L5	Q9XZ61	Drosophila melanogaster	tr		1	1	uniprot-drosophila_reviewed_unreviewed_0825_2016	>tr|Q9XZ61|Q9XZ61_DROME Ubiquitin carboxyl-terminal hydrolase OS=Drosophila melanogaster GN=Uch-L5 PE=1 SV=1	2	2
TRUE	Contr / Rep	Contr	Rep	30	Q0E9F9;Q86P95	858.181	964.449	0.168423	0.168423	12.3829	1.12383	0	0.00343489	0.00262441	29	0.173846	Q0E9F9;Q86P95	Q0E9F9_DROME;Q86P95_DROME	CG2915, isoform A;GM01959p	CG2915-RB;CG2915	Q0E9F9;Q86P95	Drosophila melanogaster	tr		1;2	1	uniprot-drosophila_reviewed_unreviewed_0825_2016	>tr|Q0E9F9|Q0E9F9_DROME CG2915, isoform A OS=Drosophila melanogaster GN=CG2915-RB PE=1 SV=1;>tr|Q86P95|Q86P95_DROME GM01959p OS=Drosophila melanogaster GN=CG2915 PE=2 SV=1	5	5
TRUE	Contr / Rep	Contr	Rep	6	Q8IGT5;Q95WY3;Q961E2	24.2308	7.56223	-1.67996	1.67996	-68.7908	0.312092	0	0.00346604	0.00263833	5	0.362581	Q8IGT5;Q95WY3;Q961E2	Q8IGT5_DROME;Q95WY3_DROME;Q961E2_DROME	RE33426p;FI04781p;GM14238p	Nop56	Q8IGT5;Q95WY3;Q961E2	Drosophila melanogaster	tr		2;1;2	1	uniprot-drosophila_reviewed_unreviewed_0825_2016	>tr|Q8IGT5|Q8IGT5_DROME RE33426p OS=Drosophila melanogaster GN=Nop56 PE=2 SV=1;>tr|Q95WY3|Q95WY3_DROME FI04781p OS=Drosophila melanogaster GN=Nop56 PE=1 SV=1;>tr|Q961E2|Q961E2_DROME GM14238p OS=Drosophila melanogaster GN=Nop56 PE=2 SV=1	1	1
TRUE	Contr / Rep	Contr	Rep	18	Q86NZ5;Q9VU38;Q9VU39	86.1955	189.186	1.13412	1.13412	119.485	2.19485	0	0.00351085	0.0026625	17	0.296473	Q86NZ5;Q9VU38;Q9VU39	Q86NZ5_DROME;Q9VU38_DROME;Q9VU39_DROME	LP07155p (Fragment);Adenosine kinase, isoform B;Adenosine kinase, isoform A	AdenoK	Q86NZ5;Q9VU38;Q9VU39	Drosophila melanogaster	tr		2;1;1	1	uniprot-drosophila_reviewed_unreviewed_0825_2016	>tr|Q86NZ5|Q86NZ5_DROME LP07155p (Fragment) OS=Drosophila melanogaster GN=AdenoK PE=2 SV=1;>tr|Q9VU38|Q9VU38_DROME Adenosine kinase, isoform B OS=Drosophila melanogaster GN=AdenoK PE=1 SV=1;>tr|Q9VU39|Q9VU39_DROME Adenosine kinase, isoform A OS=Drosophila melanogaster GN=AdenoK PE=1 SV=1	3	3
TRUE	Contr / Rep	Contr	Rep	6	Q9VXN4	34.8552	13.922	-1.324	1.324	-60.0575	0.399425	0	0.0035363	0.00267187	5	0.296091	Q9VXN4	SYRC_DROME	Probable arginine--tRNA ligase, cytoplasmic,Probable arginine--tRNA ligase, cytoplasmic	Aats-arg	Q9VXN4	Drosophila melanogaster	sp		2	1	uniprot-drosophila_reviewed_unreviewed_0825_2016	>sp|Q9VXN4|SYRC_DROME Probable arginine--tRNA ligase, cytoplasmic OS=Drosophila melanogaster GN=Aats-arg PE=2 SV=1,>sp|Q9VXN4|SYRC_DROME Probable arginine--tRNA ligase, cytoplasmic OS=Drosophila melanogaster GN=Aats-arg PE=2 SV=1	1	1
TRUE	Contr / Rep	Contr	Rep	6	A0A0B4KH25;P04908;P08985;P0C0S8;P20671;P84051;P84052;P84053;P84054;P84055;Q16777;Q4AB57;Q6FI13;Q7L7L0;Q8IUE6;Q93077;Q96KK5;Q96QV6;Q99878	1140.87	479.022	-1.25196	1.25196	-58.0124	0.419876	0	0.00357387	0.00269029	5	0.233839	A0A0B4KH25;P04908;P08985,P08985;P0C0S8;P20671;P84051,P84051;P84052;P84053;P84054;P84055;Q16777;Q4AB57;Q6FI13;Q7L7L0;Q8IUE6;Q93077;Q96KK5;Q96QV6;Q99878	A0A0B4KH25_DROME;H2A1B_HUMAN;H2AV_DROME,H2AV_DROME;H2A1_HUMAN;H2A1D_HUMAN;H2A_DROME,H2A_DROME;H2A_DROER;H2A_DROHY;H2A_DROSI;H2A_DROYA;H2A2C_HUMAN;Q4AB57_DROME;H2A2A_HUMAN;H2A3_HUMAN;H2A2B_HUMAN;H2A1C_HUMAN;H2A1H_HUMAN;H2A1A_HUMAN;H2A1J_HUMAN	Histone H2A;Histone H2A type 1-B/E;Histone H2A.v,Histone H2A.v;Histone H2A type 1;Histone H2A type 1-D;Histone H2A,Histone H2A;Histone H2A;Histone H2A;Histone H2A;Histone H2A;Histone H2A type 2-C;Histone H2A;Histone H2A type 2-A;Histone H2A type 3;Histone H2A type 2-B;Histone H2A type 1-C;Histone H2A type 1-H;Histone H2A type 1-A;Histone H2A type 1-J	His2Av;HIST1H2AB;His2Av,His2Av;HIST1H2AG;HIST1H2AD;His2A,His2A;His2A;His2A;His2A;His2A;HIST2H2AC;His2A:CG33859;HIST2H2AA3;HIST3H2A;HIST2H2AB;HIST1H2AC;HIST1H2AH;HIST1H2AA;HIST1H2AJ	A0A0B4KH25;P04908;P08985,P08985;P0C0S8;P20671;P84051,P84051;P84052;P84053;P84054;P84055;Q16777;Q4AB57;Q6FI13;Q7L7L0;Q8IUE6;Q93077;Q96KK5;Q96QV6;Q99878	Drosophila melanogaster;Homo sapiens;Drosophila melanogaster,Drosophila melanogaster;Homo sapiens;Homo sapiens;Drosophila melanogaster,Drosophila melanogaster;Drosophila erecta;Drosophila hydei;Drosophila simulans;Drosophila yakuba;Homo sapiens;Drosophila melanogaster;Homo sapiens;Homo sapiens;Homo sapiens;Homo sapiens;Homo sapiens;Homo sapiens;Homo sapiens	tr;sp;sp,sp;sp;sp;sp,sp;sp;sp;sp;sp;sp;tr;sp;sp;sp;sp;sp;sp;sp		3;1;1,1;1;1;1,1;3;3;3;2;1;3;1;1;1;1;1;1;1	1;2;2,2;2;2;2,2;2;2;2;2;4;1;3;3;3;3;3;3;3	uniprot-drosophila_reviewed_unreviewed_0825_2016	>tr|A0A0B4KH25|A0A0B4KH25_DROME Histone H2A OS=Drosophila melanogaster GN=His2Av PE=3 SV=1;>sp|P04908|H2A1B_HUMAN Histone H2A type 1-B/E OS=Homo sapiens GN=HIST1H2AB PE=1 SV=2;>sp|P08985|H2AV_DROME Histone H2A.v OS=Drosophila melanogaster GN=His2Av PE=1 SV=2,>sp|P08985|H2AV_DROME Histone H2A.v OS=Drosophila melanogaster GN=His2Av PE=1 SV=2;>sp|P0C0S8|H2A1_HUMAN Histone H2A type 1 OS=Homo sapiens …	1	1
TRUE	Contr / Rep	Contr	Rep	18	E1JHQ1;P20477	4794	3982.6	-0.26752	0.26752	-16.9254	0.830746	0	0.00359268	0.00269451	17	0.0616809	E1JHQ1;P20477,P20477	E1JHQ1_DROME;GLNA1_DROME,GLNA1_DROME	Glutamine synthetase;Glutamine synthetase 1, mitochondrial,Glutamine synthetase 1, mitochondrial	Gs1	E1JHQ1;P20477,P20477	Drosophila melanogaster	tr;sp,sp		1;2,2	1;3,3	uniprot-drosophila_reviewed_unreviewed_0825_2016	>tr|E1JHQ1|E1JHQ1_DROME Glutamine synthetase OS=Drosophila melanogaster GN=Gs1 PE=1 SV=1;>sp|P20477|GLNA1_DROME Glutamine synthetase 1, mitochondrial OS=Drosophila melanogaster GN=Gs1 PE=2 SV=3,>sp|P20477|GLNA1_DROME Glutamine synthetase 1, mitochondrial OS=Drosophila melanogaster GN=Gs1 PE=2 SV=3	3	3
TRUE	Contr / Rep	Contr	Rep	6	Q9VTB0	18.8663	8.66351	-1.12279	1.12279	-54.0796	0.459204	0	0.00361276	0.00269965	5	0.239567	Q9VTB0	Q9VTB0_DROME	CG8003, isoform A	CG8003	Q9VTB0	Drosophila melanogaster	tr		1	1	uniprot-drosophila_reviewed_unreviewed_0825_2016	>tr|Q9VTB0|Q9VTB0_DROME CG8003, isoform A OS=Drosophila melanogaster GN=CG8003 PE=1 SV=1	1	1
TRUE	Contr / Rep	Contr	Rep	8	Q95NH6	155.057	17.6071	-3.13858	3.13858	-88.6448	0.113552	0	0.00389672	0.00290121	7	0.330257	Q95NH6	ATTC_DROME	Attacin-C	AttC	Q95NH6	Drosophila melanogaster	sp		1	1	uniprot-drosophila_reviewed_unreviewed_0825_2016	>sp|Q95NH6|ATTC_DROME Attacin-C OS=Drosophila melanogaster GN=AttC PE=1 SV=1,>sp|Q95NH6|ATTC_DROME Attacin-C OS=Drosophila melanogaster GN=AttC PE=1 SV=1	2	2
TRUE	Contr / Rep	Contr	Rep	43	Q9VDT1	944.397	1306.85	0.468628	0.468628	38.3793	1.38379	0	0.00395398	0.00293314	42	0.0868206	Q9VDT1	Q9VDT1_DROME	Arc42	Arc42	Q9VDT1	Drosophila melanogaster	tr		1	1	uniprot-drosophila_reviewed_unreviewed_0825_2016	>tr|Q9VDT1|Q9VDT1_DROME Arc42 OS=Drosophila melanogaster GN=Arc42 PE=1 SV=1	5	10
TRUE	Contr / Rep	Contr	Rep	6	Q95083	116.458	68.8809	-0.757632	0.757632	-40.8533	0.591467	0	0.00402103	0.00297206	5	0.156849	Q95083	PSA5_DROME	Proteasome subunit alpha type-5	Prosalpha5	Q95083	Drosophila melanogaster	sp		2	2	uniprot-drosophila_reviewed_unreviewed_0825_2016	>sp|Q95083|PSA5_DROME Proteasome subunit alpha type-5 OS=Drosophila melanogaster GN=Prosalpha5 PE=2 SV=2,>sp|Q95083|PSA5_DROME Proteasome subunit alpha type-5 OS=Drosophila melanogaster GN=Prosalpha5 PE=2 SV=2	1	1
TRUE	Contr / Rep	Contr	Rep	6	Q9VZY0	285.127	438.72	0.621698	0.621698	53.8686	1.53869	0	0.00419519	0.00308959	5	0.126616	Q9VZY0	Q9VZY0_DROME	LD45195p	Non2	Q9VZY0	Drosophila melanogaster	tr		1	1	uniprot-drosophila_reviewed_unreviewed_0825_2016	>tr|Q9VZY0|Q9VZY0_DROME LD45195p OS=Drosophila melanogaster GN=Non2 PE=1 SV=1	1	1
TRUE	Contr / Rep	Contr	Rep	6	Q29QT8;Q9VBS6	28.8252	48.2691	0.743768	0.743768	67.4544	1.67454	0	0.00431531	0.00316663	5	0.143469	Q29QT8;Q9VBS6	Q29QT8_DROME;Q9VBS6_DROME	IP12379p (Fragment);Uncharacterized protein, isoform A	;CG31087	Q29QT8;Q9VBS6	Drosophila melanogaster	tr		2;1	1;2	uniprot-drosophila_reviewed_unreviewed_0825_2016	>tr|Q29QT8|Q29QT8_DROME IP12379p (Fragment) OS=Drosophila melanogaster PE=2 SV=1;>tr|Q9VBS6|Q9VBS6_DROME Uncharacterized protein, isoform A OS=Drosophila melanogaster GN=CG31087 PE=1 SV=2	1	1
TRUE	Contr / Rep	Contr	Rep	6	Q9VNF3	90.0342	53.625	-0.747566	0.747566	-40.4392	0.595608	0	0.00444547	0.00325045	5	0.148823	Q9VNF3	Q9VNF3_DROME	RE01652p	CG12171	Q9VNF3	Drosophila melanogaster	tr		1	1	uniprot-drosophila_reviewed_unreviewed_0825_2016	>tr|Q9VNF3|Q9VNF3_DROME RE01652p OS=Drosophila melanogaster GN=CG12171 PE=1 SV=1	1	1
TRUE	Contr / Rep	Contr	Rep	24	Q8T9G8;Q9VLM8;T2FFB7	3083.93	2151.12	-0.519682	0.519682	-30.2475	0.697525	0	0.00446777	0.00325509	23	0.237451	Q8T9G8;Q9VLM8,Q9VLM8;T2FFB7	Q8T9G8_DROME;SYAC_DROME,SYAC_DROME;T2FFB7_DROME	SD01519p;Alanine--tRNA ligase, cytoplasmic,Alanine--tRNA ligase, cytoplasmic;Alanine--tRNA ligase, cytoplasmic	AlaRS;Aats-ala,Aats-ala;Aats-ala-RB	Q8T9G8;Q9VLM8,Q9VLM8;T2FFB7	Drosophila melanogaster	tr;sp,sp;tr		2	1	uniprot-drosophila_reviewed_unreviewed_0825_2016	>tr|Q8T9G8|Q8T9G8_DROME SD01519p OS=Drosophila melanogaster GN=AlaRS PE=2 SV=1;>sp|Q9VLM8|SYAC_DROME Alanine--tRNA ligase, cytoplasmic OS=Drosophila melanogaster GN=Aats-ala PE=2 SV=1,>sp|Q9VLM8|SYAC_DROME Alanine--tRNA ligase, cytoplasmic OS=Drosophila melanogaster GN=Aats-ala PE=2 SV=1;>tr|T2FFB7|T2FFB7_DROME Alanine--tRNA ligase, cytoplasmic OS=Drosophila melanogaster GN=Aats-ala-RB PE=2 SV=1	5	5
TRUE	Contr / Rep	Contr	Rep	6	Q5BII9;Q95U61;Q9VKR4	158.073	252.004	0.672856	0.672856	59.4225	1.59423	0	0.00456525	0.00331427	5	0.143511	Q5BII9;Q95U61;Q9VKR4	Q5BII9_DROME;Q95U61_DROME;Q9VKR4_DROME	Aminomethyltransferase (Fragment);Aminomethyltransferase;Aminomethyltransferase	CG6415	Q5BII9;Q95U61;Q9VKR4	Drosophila melanogaster	tr		2;2;1	1	uniprot-drosophila_reviewed_unreviewed_0825_2016	>tr|Q5BII9|Q5BII9_DROME Aminomethyltransferase (Fragment) OS=Drosophila melanogaster GN=CG6415 PE=2 SV=1;>tr|Q95U61|Q95U61_DROME Aminomethyltransferase OS=Drosophila melanogaster GN=CG6415 PE=2 SV=1;>tr|Q9VKR4|Q9VKR4_DROME Aminomethyltransferase OS=Drosophila melanogaster GN=CG6415 PE=1 SV=1	1	1
TRUE	Contr / Rep	Contr	Rep	15	Q8MR56;Q9VK00	1619.31	1442.48	-0.166832	0.166832	-10.9203	0.890797	0	0.00479139	0.00346611	14	0.123087	Q8MR56;Q9VK00	Q8MR56_DROME;Q9VK00_DROME	GH18178p (Fragment);Uncharacterized protein, isoform A	CG16826	Q8MR56;Q9VK00	Drosophila melanogaster	tr		2;1	1	uniprot-drosophila_reviewed_unreviewed_0825_2016	>tr|Q8MR56|Q8MR56_DROME GH18178p (Fragment) OS=Drosophila melanogaster GN=CG16826 PE=2 SV=1;>tr|Q9VK00|Q9VK00_DROME Uncharacterized protein, isoform A OS=Drosophila melanogaster GN=CG16826 PE=1 SV=1	3	3
TRUE	Contr / Rep	Contr	Rep	6	C3KGL9;Q0KHQ6;Q9VWH7;Q9Y1W3;X2JED9	99.7612	190.187	0.930866	0.930866	90.642	1.90642	0	0.00496649	0.00358009	5	0.193097	C3KGL9;Q0KHQ6;Q9VWH7;Q9Y1W3;X2JED9	C3KGL9_DROME;Q0KHQ6_DROME;Q9VWH7_DROME;Q9Y1W3_DROME;X2JED9_DROME	MIP03150p;6-phosphofructo-2-kinase, isoform A;6-phosphofructo 2-kinase/fructose 2,6-bisphosphatase long form;6-phosphofructo 2-kinase/fructose 2,6-bisphosphatase short form;6-phosphofructo-2-kinase, isoform N	Pfrx-RA;Pfrx;Pfrx;Pfrx;Pfrx	C3KGL9;Q0KHQ6;Q9VWH7;Q9Y1W3;X2JED9	Drosophila melanogaster	tr		2;1;1;2;1	1;1;2;1;1	uniprot-drosophila_reviewed_unreviewed_0825_2016	>tr|C3KGL9|C3KGL9_DROME MIP03150p OS=Drosophila melanogaster GN=Pfrx-RA PE=2 SV=1;>tr|Q0KHQ6|Q0KHQ6_DROME 6-phosphofructo-2-kinase, isoform A OS=Drosophila melanogaster GN=Pfrx PE=1 SV=1;>tr|Q9VWH7|Q9VWH7_DROME 6-phosphofructo 2-kinase/fructose 2,6-bisphosphatase long form OS=Drosophila melanogaster GN=Pfrx PE=1 SV=2;>tr|Q9Y1W3|Q9Y1W3_DROME 6-phosphofructo 2-kinase/fructose 2,6-bisphosphatase sho…	1	1
TRUE	Contr / Rep	Contr	Rep	30	X2JB48	11097.8	5826.82	-0.929496	0.929496	-47.4958	0.525042	0	0.00504969	0.00362724	29	0.192761	X2JB48	X2JB48_DROME	Stress-sensitive B, isoform E	sesB	X2JB48	Drosophila melanogaster	tr		1	1	uniprot-drosophila_reviewed_unreviewed_0825_2016	>tr|X2JB48|X2JB48_DROME Stress-sensitive B, isoform E OS=Drosophila melanogaster GN=sesB PE=1 SV=1	5	5
TRUE	Contr / Rep	Contr	Rep	12	A0A0C4DHG5;P26686	45.3511	35.9195	-0.336371	0.336371	-20.7969	0.792031	0	0.005079	0.00363549	11	0.200901	A0A0C4DHG5;P26686,P26686	A0A0C4DHG5_DROME;SRR55_DROME,SRR55_DROME	B52, isoform O;Serine-arginine protein 55,Serine-arginine protein 55	B52	A0A0C4DHG5;P26686,P26686	Drosophila melanogaster	tr;sp,sp		4;1,1	1;4,4	uniprot-drosophila_reviewed_unreviewed_0825_2016	>tr|A0A0C4DHG5|A0A0C4DHG5_DROME B52, isoform O OS=Drosophila melanogaster GN=B52 PE=4 SV=1;>sp|P26686|SRR55_DROME Serine-arginine protein 55 OS=Drosophila melanogaster GN=B52 PE=1 SV=4,>sp|P26686|SRR55_DROME Serine-arginine protein 55 OS=Drosophila melanogaster GN=B52 PE=1 SV=4	1	2
TRUE	Contr / Rep	Contr	Rep	6	F0JAP7;Q9W3F3	501.329	319.379	-0.650488	0.650488	-36.2935	0.637065	0	0.00513103	0.0036599	5	0.150052	F0JAP7;Q9W3F3	F0JAP7_DROME;Q9W3F3_DROME	LP18071p;RH03540p	CG15347-RB;CG15347	F0JAP7;Q9W3F3	Drosophila melanogaster	tr		1	1;2	uniprot-drosophila_reviewed_unreviewed_0825_2016	>tr|F0JAP7|F0JAP7_DROME LP18071p OS=Drosophila melanogaster GN=CG15347-RB PE=1 SV=1;>tr|Q9W3F3|Q9W3F3_DROME RH03540p OS=Drosophila melanogaster GN=CG15347 PE=1 SV=2	1	1
TRUE	Contr / Rep	Contr	Rep	6	D8FT08;Q7K8X7	103.776	82.9175	-0.323727	0.323727	-20.0997	0.799003	0	0.00515149	0.00366169	5	0.0677557	D8FT08;Q7K8X7	D8FT08_DROME;Q7K8X7_DROME	IP05783p (Fragment);Glutathione S transferase E9	GstE9-RA;GstE9	D8FT08;Q7K8X7	Drosophila melanogaster	tr		2;1	1	uniprot-drosophila_reviewed_unreviewed_0825_2016	>tr|D8FT08|D8FT08_DROME IP05783p (Fragment) OS=Drosophila melanogaster GN=GstE9-RA PE=2 SV=1;>tr|Q7K8X7|Q7K8X7_DROME Glutathione S transferase E9 OS=Drosophila melanogaster GN=GstE9 PE=1 SV=1	1	2
TRUE	Contr / Rep	Contr	Rep	30	P20432;P30108;P67805	5380.5	6889.12	0.356579	0.356579	28.0386	1.28039	0	0.00536953	0.00379026	29	0.109457	P20432,P20432;P30108;P67805	GSTD1_DROME,GSTD1_DROME;GSTT1_DROYA;GSTT1_DROSI	Glutathione S-transferase D1,Glutathione S-transferase D1;Glutathione S-transferase 1-1;Glutathione S-transferase 1-1	GstD1	P20432,P20432;P30108;P67805	Drosophila melanogaster,Drosophila melanogaster;Drosophila yakuba;Drosophila simulans	sp		1,1;3;2	1,1;2;2	uniprot-drosophila_reviewed_unreviewed_0825_2016	>sp|P20432|GSTD1_DROME Glutathione S-transferase D1 OS=Drosophila melanogaster GN=GstD1 PE=1 SV=1,>sp|P20432|GSTD1_DROME Glutathione S-transferase D1 OS=Drosophila melanogaster GN=GstD1 PE=1 SV=1;>sp|P30108|GSTT1_DROYA Glutathione S-transferase 1-1 OS=Drosophila yakuba GN=GstD1 PE=3 SV=2;>sp|P67805|GSTT1_DROSI Glutathione S-transferase 1-1 OS=Drosophila simulans GN=GstD1 PE=2 SV=2	5	5
TRUE	Contr / Rep	Contr	Rep	6	O18602;Q9V597	7.40453	3.23686	-1.19381	1.19381	-56.2854	0.437146	0	0.0053533	0.00379026	5	0.250238	O18602;Q9V597,Q9V597	RL31_DROVI;RL31_DROME,RL31_DROME	60S ribosomal protein L31	RpL31	O18602;Q9V597,Q9V597	Drosophila virilis;Drosophila melanogaster,Drosophila melanogaster	sp		3;1,1	1	uniprot-drosophila_reviewed_unreviewed_0825_2016	>sp|O18602|RL31_DROVI 60S ribosomal protein L31 OS=Drosophila virilis GN=RpL31 PE=3 SV=1;>sp|Q9V597|RL31_DROME 60S ribosomal protein L31 OS=Drosophila melanogaster GN=RpL31 PE=1 SV=1,>sp|Q9V597|RL31_DROME 60S ribosomal protein L31 OS=Drosophila melanogaster GN=RpL31 PE=1 SV=1	1	1
TRUE	Contr / Rep	Contr	Rep	88	P52029	22525.9	17623.9	-0.35405	0.35405	-21.7615	0.782385	0	0.00545961	0.00382735	87	0.169455	P52029	G6PI_DROME	Glucose-6-phosphate isomerase	Pgi	P52029	Drosophila melanogaster	sp		2	2	uniprot-drosophila_reviewed_unreviewed_0825_2016	>sp|P52029|G6PI_DROME Glucose-6-phosphate isomerase OS=Drosophila melanogaster GN=Pgi PE=2 SV=2,>sp|P52029|G6PI_DROME Glucose-6-phosphate isomerase OS=Drosophila melanogaster GN=Pgi PE=2 SV=2	13	19
TRUE	Contr / Rep	Contr	Rep	12	Q9VF53	68.4864	83.8803	0.292514	0.292514	22.4772	1.22477	0	0.00544894	0.00382735	11	0.224667	Q9VF53	Q9VF53_DROME	Aldehyde oxidase 1	AOX1	Q9VF53	Drosophila melanogaster	tr		1	1	uniprot-drosophila_reviewed_unreviewed_0825_2016	>tr|Q9VF53|Q9VF53_DROME Aldehyde oxidase 1 OS=Drosophila melanogaster GN=AOX1 PE=1 SV=1	2	2
TRUE	Contr / Rep	Contr	Rep	6	A0A0B4K7C5;Q6NL72;Q9V3V2;Q9XZ54	7.23503	17.2227	1.25124	1.25124	138.046	2.38046	0	0.00563981	0.00394014	5	0.269817	A0A0B4K7C5;Q6NL72;Q9V3V2;Q9XZ54	A0A0B4K7C5_DROME;Q6NL72_DROME;Q9V3V2_DROME;Q9XZ54_DROME	FK506-binding protein 14 ortholog, isoform D;RE40519p;FK506-binding protein 14 ortholog, isoform A;GM07659p (Fragment)	Fkbp14;Fkbp13;Fkbp14;Fkbp14	A0A0B4K7C5;Q6NL72;Q9V3V2;Q9XZ54	Drosophila melanogaster	tr		1;2;1;2	1;1;1;2	uniprot-drosophila_reviewed_unreviewed_0825_2016	>tr|A0A0B4K7C5|A0A0B4K7C5_DROME FK506-binding protein 14 ortholog, isoform D OS=Drosophila melanogaster GN=Fkbp14 PE=1 SV=1;>tr|Q6NL72|Q6NL72_DROME RE40519p OS=Drosophila melanogaster GN=Fkbp13 PE=2 SV=1;>tr|Q9V3V2|Q9V3V2_DROME FK506-binding protein 14 ortholog, isoform A OS=Drosophila melanogaster GN=Fkbp14 PE=1 SV=1;>tr|Q9XZ54|Q9XZ54_DROME GM07659p (Fragment) OS=Drosophila melanogaster GN=Fkbp1…	1	1
TRUE	Contr / Rep	Contr	Rep	54	I0B1N8;Q7KW39	7278.83	7123.14	-0.0311949	0.0311949	-2.13905	0.978609	0	0.00575124	0.00400427	53	0.113473	I0B1N8;Q7KW39,Q7KW39	I0B1N8_DROME;MMSA_DROME,MMSA_DROME	FI19805p1 (Fragment);Probable methylmalonate-semialdehyde dehydrogenase [acylating], mitochondrial,Probable methylmalonate-semialdehyde dehydrogenase [acylating], mitochondrial	CG17896-RB;CG17896,CG17896	I0B1N8;Q7KW39,Q7KW39	Drosophila melanogaster	tr;sp,sp		2	1	uniprot-drosophila_reviewed_unreviewed_0825_2016	>tr|I0B1N8|I0B1N8_DROME FI19805p1 (Fragment) OS=Drosophila melanogaster GN=CG17896-RB PE=2 SV=1;>sp|Q7KW39|MMSA_DROME Probable methylmalonate-semialdehyde dehydrogenase [acylating], mitochondrial OS=Drosophila melanogaster GN=CG17896 PE=2 SV=1,>sp|Q7KW39|MMSA_DROME Probable methylmalonate-semialdehyde dehydrogenase [acylating], mitochondrial OS=Drosophila melanogaster GN=CG17896 PE=2 SV=1	8	9
TRUE	Contr / Rep	Contr	Rep	12	M9PH99;P20228	30.1495	86.6653	1.52332	1.52332	187.452	2.87452	0	0.00586928	0.00407256	11	0.474331	M9PH99;P20228,P20228	M9PH99_DROME;DCE_DROME,DCE_DROME	Glutamic acid decarboxylase 1, isoform D;Glutamate decarboxylase,Glutamate decarboxylase	Gad1	M9PH99;P20228,P20228	Drosophila melanogaster	tr;sp,sp		3;2,2	1;2,2	uniprot-drosophila_reviewed_unreviewed_0825_2016	>tr|M9PH99|M9PH99_DROME Glutamic acid decarboxylase 1, isoform D OS=Drosophila melanogaster GN=Gad1 PE=3 SV=1;>sp|P20228|DCE_DROME Glutamate decarboxylase OS=Drosophila melanogaster GN=Gad1 PE=2 SV=2,>sp|P20228|DCE_DROME Glutamate decarboxylase OS=Drosophila melanogaster GN=Gad1 PE=2 SV=2	2	2
TRUE	Contr / Rep	Contr	Rep	4	Q9VK12	19.4907	45.6846	1.22892	1.22892	134.391	2.34391	0	0.00600535	0.00415285	3	0.292715	Q9VK12	Q9VK12_DROME	CG5945, isoform A	CG5945	Q9VK12	Drosophila melanogaster	tr		1	1	uniprot-drosophila_reviewed_unreviewed_0825_2016	>tr|Q9VK12|Q9VK12_DROME CG5945, isoform A OS=Drosophila melanogaster GN=CG5945 PE=1 SV=1	1	1
TRUE	Contr / Rep	Contr	Rep	48	A0A0U3SHB6;C9QP21;P08171	7243.76	10827	0.579827	0.579827	49.467	1.49467	0	0.00609581	0.00420117	47	0.146088	A0A0U3SHB6;C9QP21;P08171,P08171	A0A0U3SHB6_DROME;C9QP21_DROME;EST6_DROME,EST6_DROME	Carboxylic ester hydrolase;Carboxylic ester hydrolase;Esterase-6,Esterase-6	;Est-6;Est-6,Est-6	A0A0U3SHB6;C9QP21;P08171,P08171	Drosophila melanogaster	tr;tr;sp,sp		3;1;1,1	1;1;2,2	uniprot-drosophila_reviewed_unreviewed_0825_2016	>tr|A0A0U3SHB6|A0A0U3SHB6_DROME Carboxylic ester hydrolase OS=Drosophila melanogaster PE=3 SV=1;>tr|C9QP21|C9QP21_DROME Carboxylic ester hydrolase OS=Drosophila melanogaster GN=Est-6 PE=1 SV=1;>sp|P08171|EST6_DROME Esterase-6 OS=Drosophila melanogaster GN=Est-6 PE=1 SV=2,>sp|P08171|EST6_DROME Esterase-6 OS=Drosophila melanogaster GN=Est-6 PE=1 SV=2	8	8
TRUE	Contr / Rep	Contr	Rep	42	Q9VGQ1	1587.58	2253.69	0.505462	0.505462	41.9578	1.41958	0	0.0061485	0.00422321	41	0.175329	Q9VGQ1	Q9VGQ1_DROME	CG5214	CG5214	Q9VGQ1	Drosophila melanogaster	tr		1	1	uniprot-drosophila_reviewed_unreviewed_0825_2016	>tr|Q9VGQ1|Q9VGQ1_DROME CG5214 OS=Drosophila melanogaster GN=CG5214 PE=1 SV=1	6	7
TRUE	Contr / Rep	Contr	Rep	18	A0A0B4LGB7;E8NHA8;P22700	55.4839	35.0021	-0.664629	0.664629	-36.9149	0.630851	0	0.00620187	0.00424558	17	0.256765	A0A0B4LGB7;E8NHA8;P22700,P22700	A0A0B4LGB7_DROME;E8NHA8_DROME;ATC1_DROME,ATC1_DROME	Calcium-transporting ATPase;Calcium-transporting ATPase;Calcium-transporting ATPase sarcoplasmic/endoplasmic reticulum type,Calcium-transporting ATPase sarcoplasmic/endoplasmic reticulum type	SERCA;Ca-P60A-RC;Ca-P60A,Ca-P60A	A0A0B4LGB7;E8NHA8;P22700,P22700	Drosophila melanogaster	tr;tr;sp,sp		1;2;1,1	1;1;2,2	uniprot-drosophila_reviewed_unreviewed_0825_2016	>tr|A0A0B4LGB7|A0A0B4LGB7_DROME Calcium-transporting ATPase OS=Drosophila melanogaster GN=SERCA PE=1 SV=1;>tr|E8NHA8|E8NHA8_DROME Calcium-transporting ATPase OS=Drosophila melanogaster GN=Ca-P60A-RC PE=2 SV=1;>sp|P22700|ATC1_DROME Calcium-transporting ATPase sarcoplasmic/endoplasmic reticulum type OS=Drosophila melanogaster GN=Ca-P60A PE=1 SV=2,>sp|P22700|ATC1_DROME Calcium-transporting ATPase sa…	3	3
TRUE	Contr / Rep	Contr	Rep	6	Q9VCD9	81.8669	60.9307	-0.426111	0.426111	-25.5735	0.744265	0	0.00627541	0.00428155	5	0.0929623	Q9VCD9	Q9VCD9_DROME	CG6000, isoform C	CG6000	Q9VCD9	Drosophila melanogaster	tr		1	3	uniprot-drosophila_reviewed_unreviewed_0825_2016	>tr|Q9VCD9|Q9VCD9_DROME CG6000, isoform C OS=Drosophila melanogaster GN=CG6000 PE=1 SV=3	1	1
TRUE	Contr / Rep	Contr	Rep	6	B3ME25;B3NMI5;B4GAY7;B4HMV9;B4J6D5;B4KNN9;B4LM71;B4MQL8;B4P5F7;B4QB88;B5E081;E2QCG7;Q0E940	108.898	84.2307	-0.370557	0.370557	-22.6516	0.773484	0	0.00637185	0.00433286	5	0.0824191	B3ME25;B3NMI5;B4GAY7;B4HMV9;B4J6D5;B4KNN9;B4LM71;B4MQL8;B4P5F7;B4QB88;B5E081;E2QCG7;Q0E940,Q0E940	EIF3B_DROAN;EIF3B_DROER;EIF3B_DROPE;EIF3B_DROSE;EIF3B_DROGR;EIF3B_DROMO;EIF3B_DROVI;EIF3B_DROWI;EIF3B_DROYA;EIF3B_DROSI;EIF3B_DROPS;E2QCG7_DROME;EIF3B_DROME,EIF3B_DROME	Eukaryotic translation initiation factor 3 subunit B	eIF3-S9	B3ME25;B3NMI5;B4GAY7;B4HMV9;B4J6D5;B4KNN9;B4LM71;B4MQL8;B4P5F7;B4QB88;B5E081;E2QCG7;Q0E940,Q0E940	Drosophila ananassae;Drosophila erecta;Drosophila persimilis;Drosophila sechellia;Drosophila grimshawi;Drosophila mojavensis;Drosophila virilis;Drosophila willistoni;Drosophila yakuba;Drosophila simulans;Drosophila pseudoobscura pseudoobscura;Drosophila melanogaster;Drosophila melanogaster,Drosophila melanogaster	sp;sp;sp;sp;sp;sp;sp;sp;sp;sp;sp;tr;sp,sp		3;3;3;3;3;3;3;3;3;3;3;1;1,1	1	uniprot-drosophila_reviewed_unreviewed_0825_2016	>sp|B3ME25|EIF3B_DROAN Eukaryotic translation initiation factor 3 subunit B OS=Drosophila ananassae GN=eIF3-S9 PE=3 SV=1;>sp|B3NMI5|EIF3B_DROER Eukaryotic translation initiation factor 3 subunit B OS=Drosophila erecta GN=eIF3-S9 PE=3 SV=1;>sp|B4GAY7|EIF3B_DROPE Eukaryotic translation initiation factor 3 subunit B OS=Drosophila persimilis GN=eIF3-S9 PE=3 SV=1;>sp|B4HMV9|EIF3B_DROSE Eukaryotic tran…	1	1
TRUE	Contr / Rep	Contr	Rep	6	M9PDP3;Q8INW9;Q9VIX7	31.3802	61.7068	0.975572	0.975572	96.6421	1.96642	0	0.0067354	0.00456486	5	0.244091	M9PDP3;Q8INW9;Q9VIX7	M9PDP3_DROME;Q8INW9_DROME;Q9VIX7_DROME	Fondue, isoform D;Fondue, isoform A;Fondue, isoform B	fon	M9PDP3;Q8INW9;Q9VIX7	Drosophila melanogaster	tr		1	1	uniprot-drosophila_reviewed_unreviewed_0825_2016	>tr|M9PDP3|M9PDP3_DROME Fondue, isoform D OS=Drosophila melanogaster GN=fon PE=1 SV=1;>tr|Q8INW9|Q8INW9_DROME Fondue, isoform A OS=Drosophila melanogaster GN=fon PE=1 SV=1;>tr|Q9VIX7|Q9VIX7_DROME Fondue, isoform B OS=Drosophila melanogaster GN=fon PE=1 SV=1	1	1
TRUE	Contr / Rep	Contr	Rep	48	A8E774;P25007	54264.3	48426.7	-0.164201	0.164201	-10.7577	0.892423	0	0.00692252	0.00467614	47	0.0647316	A8E774;P25007,P25007	A8E774_DROME;PPIA_DROME,PPIA_DROME	Peptidyl-prolyl cis-trans isomerase	Cyp1	A8E774;P25007,P25007	Drosophila melanogaster	tr;sp,sp		2;1,1	1;2,2	uniprot-drosophila_reviewed_unreviewed_0825_2016	>tr|A8E774|A8E774_DROME Peptidyl-prolyl cis-trans isomerase OS=Drosophila melanogaster GN=Cyp1 PE=2 SV=1;>sp|P25007|PPIA_DROME Peptidyl-prolyl cis-trans isomerase OS=Drosophila melanogaster GN=Cyp1 PE=1 SV=2,>sp|P25007|PPIA_DROME Peptidyl-prolyl cis-trans isomerase OS=Drosophila melanogaster GN=Cyp1 PE=1 SV=2	6	8
TRUE	Contr / Rep	Contr	Rep	6	Q7KTA1	64.4272	44.8841	-0.521464	0.521464	-30.3336	0.696664	0	0.00700528	0.00471642	5	0.119636	Q7KTA1	Q7KTA1_DROME	HL01444p	NimB2	Q7KTA1	Drosophila melanogaster	tr		2	1	uniprot-drosophila_reviewed_unreviewed_0825_2016	>tr|Q7KTA1|Q7KTA1_DROME HL01444p OS=Drosophila melanogaster GN=NimB2 PE=2 SV=1	1	1
TRUE	Contr / Rep	Contr	Rep	30	Q9V3Z4	77.8204	62.2513	-0.322046	0.322046	-20.0065	0.799935	0	0.00706114	0.0047384	29	0.130485	Q9V3Z4	Q9V3Z4_DROME	GH11341p	Rpn5	Q9V3Z4	Drosophila melanogaster	tr		1	1	uniprot-drosophila_reviewed_unreviewed_0825_2016	>tr|Q9V3Z4|Q9V3Z4_DROME GH11341p OS=Drosophila melanogaster GN=Rpn5 PE=1 SV=1	4	5
TRUE	Contr / Rep	Contr	Rep	6	Q8MSE0;Q8SY96;Q8SYM2	101.21	34.6738	-1.54544	1.54544	-65.7408	0.342592	0	0.00712197	0.00475494	5	0.358383	Q8MSE0;Q8SY96,Q8SY96;Q8SYM2	Q8MSE0_DROME;NFU1_DROME,NFU1_DROME;Q8SYM2_DROME	GM32035p;NFU1 iron-sulfur cluster scaffold homolog, mitochondrial,NFU1 iron-sulfur cluster scaffold homolog, mitochondrial;RE53788p	;CG32500,CG32500;CG18856	Q8MSE0;Q8SY96,Q8SY96;Q8SYM2	Drosophila melanogaster	tr;sp,sp;tr		2	1	uniprot-drosophila_reviewed_unreviewed_0825_2016	>tr|Q8MSE0|Q8MSE0_DROME GM32035p OS=Drosophila melanogaster PE=2 SV=1;>sp|Q8SY96|NFU1_DROME NFU1 iron-sulfur cluster scaffold homolog, mitochondrial OS=Drosophila melanogaster GN=CG32500 PE=2 SV=1,>sp|Q8SY96|NFU1_DROME NFU1 iron-sulfur cluster scaffold homolog, mitochondrial OS=Drosophila melanogaster GN=CG32500 PE=2 SV=1;>tr|Q8SYM2|Q8SYM2_DROME RE53788p OS=Drosophila melanogaster GN=CG18856 PE=2…	1	1
TRUE	Contr / Rep	Contr	Rep	6	B1PFP9;B1PFR1;B1PFR5;B1PFS0;B1PFS2;Q1EC09;Q9VJI7	34.3803	20.4781	-0.747501	0.747501	-40.4366	0.595634	0	0.00713241	0.00475494	5	0.169644	B1PFP9;B1PFR1;B1PFR5;B1PFS0;B1PFS2;Q1EC09;Q9VJI7	B1PFP9_DROME;B1PFR1_DROME;B1PFR5_DROME;B1PFS0_DROME;B1PFS2_DROME;Q1EC09_DROME;Q9VJI7_DROME	CG13277 (Fragment);CG13277 (Fragment);CG13277 (Fragment);CG13277 (Fragment);CG13277 (Fragment);IP12320p;LSm7, isoform A	CG13277;CG13277;CG13277;CG13277;CG13277;;LSm7	B1PFP9;B1PFR1;B1PFR5;B1PFS0;B1PFS2;Q1EC09;Q9VJI7	Drosophila melanogaster	tr		4;4;4;4;4;2;1	1	uniprot-drosophila_reviewed_unreviewed_0825_2016	>tr|B1PFP9|B1PFP9_DROME CG13277 (Fragment) OS=Drosophila melanogaster GN=CG13277 PE=4 SV=1;>tr|B1PFR1|B1PFR1_DROME CG13277 (Fragment) OS=Drosophila melanogaster GN=CG13277 PE=4 SV=1;>tr|B1PFR5|B1PFR5_DROME CG13277 (Fragment) OS=Drosophila melanogaster GN=CG13277 PE=4 SV=1;>tr|B1PFS0|B1PFS0_DROME CG13277 (Fragment) OS=Drosophila melanogaster GN=CG13277 PE=4 SV=1;>tr|B1PFS2|B1PFS2_DROME CG13277 (Fr…	1	1
TRUE	Contr / Rep	Contr	Rep	18	Q7JZZ3	791.876	585.599	-0.43536	0.43536	-26.0491	0.739509	0	0.0071738	0.00476696	17	0.202663	Q7JZZ3	Q7JZZ3_DROME	RE03883p	CG13321	Q7JZZ3	Drosophila melanogaster	tr		1	1	uniprot-drosophila_reviewed_unreviewed_0825_2016	>tr|Q7JZZ3|Q7JZZ3_DROME RE03883p OS=Drosophila melanogaster GN=CG13321 PE=1 SV=1	3	3
TRUE	Contr / Rep	Contr	Rep	18	E1JGZ9;Q9XZJ4	955.786	505.272	-0.919626	0.919626	-47.1354	0.528646	0	0.00723839	0.00479426	17	0.182867	E1JGZ9;Q9XZJ4,Q9XZJ4	E1JGZ9_DROME;PSA6_DROME,PSA6_DROME	Proteasome subunit alpha type;Proteasome subunit alpha type-6,Proteasome subunit alpha type-6	CG30382;Prosalpha1,Prosalpha1	E1JGZ9;Q9XZJ4,Q9XZJ4	Drosophila melanogaster	tr;sp,sp		1	1;2,2	uniprot-drosophila_reviewed_unreviewed_0825_2016	>tr|E1JGZ9|E1JGZ9_DROME Proteasome subunit alpha type OS=Drosophila melanogaster GN=CG30382 PE=1 SV=1;>sp|Q9XZJ4|PSA6_DROME Proteasome subunit alpha type-6 OS=Drosophila melanogaster GN=Prosalpha1 PE=1 SV=2,>sp|Q9XZJ4|PSA6_DROME Proteasome subunit alpha type-6 OS=Drosophila melanogaster GN=Prosalpha1 PE=1 SV=2	3	3
TRUE	Contr / Rep	Contr	Rep	12	Q8SWZ8;Q9VH72	73.1733	87.4998	0.257961	0.257961	19.5788	1.19579	0	0.00742626	0.0048956	11	0.148931	Q8SWZ8;Q9VH72	Q8SWZ8_DROME;Q9VH72_DROME	RH49505p;CG9471, isoform A	CG9471;CG9471-RA	Q8SWZ8;Q9VH72	Drosophila melanogaster	tr		2;1	1	uniprot-drosophila_reviewed_unreviewed_0825_2016	>tr|Q8SWZ8|Q8SWZ8_DROME RH49505p OS=Drosophila melanogaster GN=CG9471 PE=2 SV=1;>tr|Q9VH72|Q9VH72_DROME CG9471, isoform A OS=Drosophila melanogaster GN=CG9471-RA PE=1 SV=1	2	2
TRUE	Contr / Rep	Contr	Rep	6	A0A0C4FEI8;Q8IH82;Q9NHV8;Q9V3D8	27.5141	12.2263	-1.17019	1.17019	-55.5636	0.444364	0	0.00743939	0.0048956	5	0.279355	A0A0C4FEI8;Q8IH82;Q9NHV8;Q9V3D8	A0A0C4FEI8_DROME;Q8IH82_DROME;Q9NHV8_DROME;Q9V3D8_DROME	Granny smith, isoform F;AT31511p;Putative cytoplasmic aminopeptidase;GH27579p	grsm	A0A0C4FEI8;Q8IH82;Q9NHV8;Q9V3D8	Drosophila melanogaster	tr		1;2;2;1	1	uniprot-drosophila_reviewed_unreviewed_0825_2016	>tr|A0A0C4FEI8|A0A0C4FEI8_DROME Granny smith, isoform F OS=Drosophila melanogaster GN=grsm PE=1 SV=1;>tr|Q8IH82|Q8IH82_DROME AT31511p OS=Drosophila melanogaster GN=grsm PE=2 SV=1;>tr|Q9NHV8|Q9NHV8_DROME Putative cytoplasmic aminopeptidase OS=Drosophila melanogaster GN=grsm PE=2 SV=1;>tr|Q9V3D8|Q9V3D8_DROME GH27579p OS=Drosophila melanogaster GN=grsm PE=1 SV=1	1	1
TRUE	Contr / Rep	Contr	Rep	12	A0A0B4LH29;Q8IGV8;Q9W2J5	52.484	136.068	1.37438	1.37438	159.257	2.59257	0	0.00748532	0.00490998	11	0.26135	A0A0B4LH29;Q8IGV8;Q9W2J5	A0A0B4LH29_DROME;Q8IGV8_DROME;Q9W2J5_DROME	Uncharacterized protein, isoform B;RE21586p;Uncharacterized protein, isoform A	CG44245;CG9480;CG44245	A0A0B4LH29;Q8IGV8;Q9W2J5	Drosophila melanogaster	tr		1;2;1	1;1;3	uniprot-drosophila_reviewed_unreviewed_0825_2016	>tr|A0A0B4LH29|A0A0B4LH29_DROME Uncharacterized protein, isoform B OS=Drosophila melanogaster GN=CG44245 PE=1 SV=1;>tr|Q8IGV8|Q8IGV8_DROME RE21586p OS=Drosophila melanogaster GN=CG9480 PE=2 SV=1;>tr|Q9W2J5|Q9W2J5_DROME Uncharacterized protein, isoform A OS=Drosophila melanogaster GN=CG44245 PE=1 SV=3	2	2
TRUE	Contr / Rep	Contr	Rep	6	A1ZBK7	239.37	330.672	0.466159	0.466159	38.1426	1.38143	0	0.00759046	0.00496299	5	0.107217	A1ZBK7	A1ZBK7_DROME	Crammer	cer	A1ZBK7	Drosophila melanogaster	tr		1	1	uniprot-drosophila_reviewed_unreviewed_0825_2016	>tr|A1ZBK7|A1ZBK7_DROME Crammer OS=Drosophila melanogaster GN=cer PE=1 SV=1	1	1
TRUE	Contr / Rep	Contr	Rep	18	A1Z6V5;Q9U5W8	79.0137	159.538	1.01373	1.01373	101.912	2.01912	0	0.00786831	0.00512823	17	0.203488	A1Z6V5;Q9U5W8	A1Z6V5_DROME;Q9U5W8_DROME	FI01422p;Serpin, putative	Spn43Ab	A1Z6V5;Q9U5W8	Drosophila melanogaster	tr		1;2	1	uniprot-drosophila_reviewed_unreviewed_0825_2016	>tr|A1Z6V5|A1Z6V5_DROME FI01422p OS=Drosophila melanogaster GN=Spn43Ab PE=1 SV=1;>tr|Q9U5W8|Q9U5W8_DROME Serpin, putative OS=Drosophila melanogaster GN=Spn43Ab PE=2 SV=1	3	3
TRUE	Contr / Rep	Contr	Rep	6	Q9VCK1	18.8557	13.0868	-0.526887	0.526887	-30.5949	0.694051	0	0.00796842	0.00517694	5	0.121115	Q9VCK1	Q9VCK1_DROME	Gamma-interferon-inducible lysosomal thiol reductase 2	GILT2	Q9VCK1	Drosophila melanogaster	tr		2	1	uniprot-drosophila_reviewed_unreviewed_0825_2016	>tr|Q9VCK1|Q9VCK1_DROME Gamma-interferon-inducible lysosomal thiol reductase 2 OS=Drosophila melanogaster GN=GILT2 PE=2 SV=1	1	1
TRUE	Contr / Rep	Contr	Rep	18	A0A0B4KGP8;Q24208	255.139	168.709	-0.596749	0.596749	-33.8758	0.661242	0	0.00816332	0.00528672	17	0.262446	A0A0B4KGP8;Q24208,Q24208	A0A0B4KGP8_DROME;IF2G_DROME,IF2G_DROME	Eukaryotic initiation factor 2gamma, isoform D;Eukaryotic translation initiation factor 2 subunit 3,Eukaryotic translation initiation factor 2 subunit 3	eIF-2gamma	A0A0B4KGP8;Q24208,Q24208	Drosophila melanogaster	tr;sp,sp		1;2,2	1	uniprot-drosophila_reviewed_unreviewed_0825_2016	>tr|A0A0B4KGP8|A0A0B4KGP8_DROME Eukaryotic initiation factor 2gamma, isoform D OS=Drosophila melanogaster GN=eIF-2gamma PE=1 SV=1;>sp|Q24208|IF2G_DROME Eukaryotic translation initiation factor 2 subunit 3 OS=Drosophila melanogaster GN=eIF-2gamma PE=2 SV=1,>sp|Q24208|IF2G_DROME Eukaryotic translation initiation factor 2 subunit 3 OS=Drosophila melanogaster GN=eIF-2gamma PE=2 SV=1	3	3
TRUE	Contr / Rep	Contr	Rep	12	Q9VJ43;Q9VJ44	28.5334	15.7308	-0.859063	0.859063	-44.869	0.55131	0	0.00822275	0.00530836	11	0.205529	Q9VJ43;Q9VJ44	Q9VJ43_DROME;Q9VJ44_DROME	LD10783p;SD06839p	ScpX;CG17597	Q9VJ43;Q9VJ44	Drosophila melanogaster	tr		1	1;2	uniprot-drosophila_reviewed_unreviewed_0825_2016	>tr|Q9VJ43|Q9VJ43_DROME LD10783p OS=Drosophila melanogaster GN=ScpX PE=1 SV=1;>tr|Q9VJ44|Q9VJ44_DROME SD06839p OS=Drosophila melanogaster GN=CG17597 PE=1 SV=2	2	2
TRUE	Contr / Rep	Contr	Rep	18	A0A0B4LGZ8;A9QHM4;A9QHQ8;Q8SY61	14004.7	10521.8	-0.412535	0.412535	-24.8698	0.751302	0	0.00841987	0.00541847	17	0.140781	A0A0B4LGZ8;A9QHM4;A9QHQ8;Q8SY61,Q8SY61	A0A0B4LGZ8_DROME;A9QHM4_DROME;A9QHQ8_DROME;OB56D_DROME,OB56D_DROME	Odorant-binding protein 56d, isoform B;FI09203p (Fragment);Odorant-binding protein 56d (Fragment);General odorant-binding protein 56d,General odorant-binding protein 56d	Obp56d	A0A0B4LGZ8;A9QHM4;A9QHQ8;Q8SY61,Q8SY61	Drosophila melanogaster	tr;tr;tr;sp,sp		1;2;4;1,1	1;1;1;2,2	uniprot-drosophila_reviewed_unreviewed_0825_2016	>tr|A0A0B4LGZ8|A0A0B4LGZ8_DROME Odorant-binding protein 56d, isoform B OS=Drosophila melanogaster GN=Obp56d PE=1 SV=1;>tr|A9QHM4|A9QHM4_DROME FI09203p (Fragment) OS=Drosophila melanogaster GN=Obp56d PE=2 SV=1;>tr|A9QHQ8|A9QHQ8_DROME Odorant-binding protein 56d (Fragment) OS=Drosophila melanogaster GN=Obp56d PE=4 SV=1;>sp|Q8SY61|OB56D_DROME General odorant-binding protein 56d OS=Drosophila melanog…	3	3
TRUE	Contr / Rep	Contr	Rep	12	A8JV22;Q9W3F6;X2JEJ0	109.014	48.1085	-1.18015	1.18015	-55.8694	0.441306	0	0.00845774	0.00542572	11	0.498786	A8JV22;Q9W3F6;X2JEJ0	A8JV22_DROME;Q9W3F6_DROME;X2JEJ0_DROME	AT08049p;CG1440, isoform A;CG1440, isoform D	CG1440-RC;CG1440;CG1440	A8JV22;Q9W3F6;X2JEJ0	Drosophila melanogaster	tr		1	1;2;1	uniprot-drosophila_reviewed_unreviewed_0825_2016	>tr|A8JV22|A8JV22_DROME AT08049p OS=Drosophila melanogaster GN=CG1440-RC PE=1 SV=1;>tr|Q9W3F6|Q9W3F6_DROME CG1440, isoform A OS=Drosophila melanogaster GN=CG1440 PE=1 SV=2;>tr|X2JEJ0|X2JEJ0_DROME CG1440, isoform D OS=Drosophila melanogaster GN=CG1440 PE=1 SV=1	2	2
TRUE	Contr / Rep	Contr	Rep	12	Q7KN75;Q9U982	49.6228	41.8174	-0.246897	0.246897	-15.7293	0.842707	0	0.00858568	0.00549053	11	0.0739351	Q7KN75;Q9U982	Q7KN75_DROME;Q9U982_DROME	Dodeca-satellite-binding protein 1, isoform A;Drosophila dodeca-satellite protein 1	Dp1	Q7KN75;Q9U982	Drosophila melanogaster	tr		1;2	1	uniprot-drosophila_reviewed_unreviewed_0825_2016	>tr|Q7KN75|Q7KN75_DROME Dodeca-satellite-binding protein 1, isoform A OS=Drosophila melanogaster GN=Dp1 PE=1 SV=1;>tr|Q9U982|Q9U982_DROME Drosophila dodeca-satellite protein 1 OS=Drosophila melanogaster GN=Dp1 PE=2 SV=1	2	2
TRUE	Contr / Rep	Contr	Rep	6	Q7KN04	4.35058	12.048	1.46952	1.46952	176.929	2.76929	0	0.00870678	0.00555057	5	0.311442	Q7KN04	Q7KN04_DROME	Fat-spondin	fat-spondin	Q7KN04	Drosophila melanogaster	tr		1	1	uniprot-drosophila_reviewed_unreviewed_0825_2016	>tr|Q7KN04|Q7KN04_DROME Fat-spondin OS=Drosophila melanogaster GN=fat-spondin PE=1 SV=1	1	1
TRUE	Contr / Rep	Contr	Rep	18	E4NKL2;H1UUD4;Q8IPU3;Q9I7P8;Q9VPB3	66.8312	49.2578	-0.440171	0.440171	-26.2953	0.737047	0	0.00883378	0.00561399	17	0.247788	E4NKL2;H1UUD4;Q8IPU3;Q9I7P8;Q9VPB3	E4NKL2_DROME;H1UUD4_DROME;Q8IPU3_DROME;Q9I7P8_DROME;Q9VPB3_DROME	AT09325p (Fragment);FI19313p1 (Fragment);CG4365, isoform C;CG4365, isoform B;CG4365, isoform A	CG4365-RC;CG4365-RC;tzn;tzn;tzn	E4NKL2;H1UUD4;Q8IPU3;Q9I7P8;Q9VPB3	Drosophila melanogaster	tr		2;2;1;1;1	1;1;1;1;2	uniprot-drosophila_reviewed_unreviewed_0825_2016	>tr|E4NKL2|E4NKL2_DROME AT09325p (Fragment) OS=Drosophila melanogaster GN=CG4365-RC PE=2 SV=1;>tr|H1UUD4|H1UUD4_DROME FI19313p1 (Fragment) OS=Drosophila melanogaster GN=CG4365-RC PE=2 SV=1;>tr|Q8IPU3|Q8IPU3_DROME CG4365, isoform C OS=Drosophila melanogaster GN=tzn PE=1 SV=1;>tr|Q9I7P8|Q9I7P8_DROME CG4365, isoform B OS=Drosophila melanogaster GN=tzn PE=1 SV=1;>tr|Q9VPB3|Q9VPB3_DROME CG4365, isofor…	3	3
TRUE	Contr / Rep	Contr	Rep	12	C9QP57;H5V8E8;Q8IHE3;Q95U00;Q9VDZ7;Q9VDZ8	15.5428	8.12893	-0.935106	0.935106	-47.6996	0.523004	0	0.00908516	0.00575581	11	0.259583	C9QP57;H5V8E8;Q8IHE3;Q95U00;Q9VDZ7;Q9VDZ8	C9QP57_DROME;H5V8E8_DROME;Q8IHE3_DROME;Q95U00_DROME;Q9VDZ7_DROME;Q9VDZ8_DROME	Mitochondrial import inner membrane translocase subunit TIM44;FI19331p1 (Fragment);Mitochondrial import inner membrane translocase subunit TIM44;Mitochondrial import inner membrane translocase subunit TIM44;Mitochondrial import inner membrane translocase subunit TIM44;Mitochondrial import inner membrane translocase subunit TIM44	CG11779-RB;CG11779-RA;CG11779;CG11779;CG11779;CG11779-RB	C9QP57;H5V8E8;Q8IHE3;Q95U00;Q9VDZ7;Q9VDZ8	Drosophila melanogaster	tr		2;2;2;2;1;1	1	uniprot-drosophila_reviewed_unreviewed_0825_2016	>tr|C9QP57|C9QP57_DROME Mitochondrial import inner membrane translocase subunit TIM44 OS=Drosophila melanogaster GN=CG11779-RB PE=2 SV=1;>tr|H5V8E8|H5V8E8_DROME FI19331p1 (Fragment) OS=Drosophila melanogaster GN=CG11779-RA PE=2 SV=1;>tr|Q8IHE3|Q8IHE3_DROME Mitochondrial import inner membrane translocase subunit TIM44 OS=Drosophila melanogaster GN=CG11779 PE=2 SV=1;>tr|Q95U00|Q95U00_DROME Mitochon…	2	2
TRUE	Contr / Rep	Contr	Rep	24	P14130;Q6XI08;X2JCX8	5285.78	4400.84	-0.264336	0.264336	-16.7418	0.832582	0	0.0095201	0.00601269	23	0.0991541	P14130,P14130;Q6XI08;X2JCX8	RS14_DROME,RS14_DROME;RS14A_DROYA;X2JCX8_DROME	40S ribosomal protein S14,40S ribosomal protein S14;40S ribosomal protein S14a;Ribosomal protein S14b, isoform B	RpS14a,RpS14a;RpS14a;RpS14b	P14130,P14130;Q6XI08;X2JCX8	Drosophila melanogaster,Drosophila melanogaster;Drosophila yakuba;Drosophila melanogaster	sp,sp;sp;tr		1,1;2;3	1	uniprot-drosophila_reviewed_unreviewed_0825_2016	>sp|P14130|RS14_DROME 40S ribosomal protein S14 OS=Drosophila melanogaster GN=RpS14a PE=1 SV=1,>sp|P14130|RS14_DROME 40S ribosomal protein S14 OS=Drosophila melanogaster GN=RpS14a PE=1 SV=1;>sp|Q6XI08|RS14A_DROYA 40S ribosomal protein S14a OS=Drosophila yakuba GN=RpS14a PE=2 SV=1;>tr|X2JCX8|X2JCX8_DROME Ribosomal protein S14b, isoform B OS=Drosophila melanogaster GN=RpS14b PE=3 SV=1	3	4
TRUE	Contr / Rep	Contr	Rep	18	C8VV34;M9PGX7;Q8IRG3;Q9W058	341.069	252.425	-0.434206	0.434206	-25.9899	0.740101	0	0.00966069	0.00608266	17	0.124449	C8VV34;M9PGX7;Q8IRG3;Q9W058	C8VV34_DROME;M9PGX7_DROME;Q8IRG3_DROME;Q9W058_DROME	Succinyl-CoA:3-ketoacid-coenzyme A transferase	CG1140-RB;SCOT;SCOT;SCOT	C8VV34;M9PGX7;Q8IRG3;Q9W058	Drosophila melanogaster	tr		2;1;1;1	1	uniprot-drosophila_reviewed_unreviewed_0825_2016	>tr|C8VV34|C8VV34_DROME Succinyl-CoA:3-ketoacid-coenzyme A transferase OS=Drosophila melanogaster GN=CG1140-RB PE=2 SV=1;>tr|M9PGX7|M9PGX7_DROME Succinyl-CoA:3-ketoacid-coenzyme A transferase OS=Drosophila melanogaster GN=SCOT PE=1 SV=1;>tr|Q8IRG3|Q8IRG3_DROME Succinyl-CoA:3-ketoacid-coenzyme A transferase OS=Drosophila melanogaster GN=SCOT PE=1 SV=1;>tr|Q9W058|Q9W058_DROME Succinyl-CoA:3-ketoaci…	2	3
TRUE	Contr / Rep	Contr	Rep	6	P40304	84.2353	44.0289	-0.935975	0.935975	-47.7311	0.522689	0	0.00979607	0.00614892	5	0.246311	P40304	PSB1_DROME	Proteasome subunit beta type-1	Prosbeta6	P40304	Drosophila melanogaster	sp		2	2	uniprot-drosophila_reviewed_unreviewed_0825_2016	>sp|P40304|PSB1_DROME Proteasome subunit beta type-1 OS=Drosophila melanogaster GN=Prosbeta6 PE=2 SV=2,>sp|P40304|PSB1_DROME Proteasome subunit beta type-1 OS=Drosophila melanogaster GN=Prosbeta6 PE=2 SV=2	1	1
TRUE	Contr / Rep	Contr	Rep	12	M9NEU5;P25843	10116.9	8675.4	-0.22177	0.22177	-14.2487	0.857513	0	0.00984127	0.00615834	11	0.0877368	M9NEU5;P25843,P25843	M9NEU5_DROME;PROF_DROME,PROF_DROME	Profilin	chic	M9NEU5;P25843,P25843	Drosophila melanogaster	tr;sp,sp		3;1,1	1	uniprot-drosophila_reviewed_unreviewed_0825_2016	>tr|M9NEU5|M9NEU5_DROME Profilin OS=Drosophila melanogaster GN=chic PE=3 SV=1;>sp|P25843|PROF_DROME Profilin OS=Drosophila melanogaster GN=chic PE=1 SV=1,>sp|P25843|PROF_DROME Profilin OS=Drosophila melanogaster GN=chic PE=1 SV=1	2	2
TRUE	Contr / Rep	Contr	Rep	6	Q7K0S8;Q9VRD4	394.036	310.097	-0.345607	0.345607	-21.3023	0.786977	0	0.0100317	0.0062583	5	0.0845392	Q7K0S8;Q9VRD4	Q7K0S8_DROME;Q9VRD4_DROME	LD36566p (Fragment);CG1532, isoform A	CG1532	Q7K0S8;Q9VRD4	Drosophila melanogaster	tr		2;1	1	uniprot-drosophila_reviewed_unreviewed_0825_2016	>tr|Q7K0S8|Q7K0S8_DROME LD36566p (Fragment) OS=Drosophila melanogaster GN=CG1532 PE=2 SV=1;>tr|Q9VRD4|Q9VRD4_DROME CG1532, isoform A OS=Drosophila melanogaster GN=CG1532 PE=1 SV=1	1	1
TRUE	Contr / Rep	Contr	Rep	6	A0A0B4LES3;Q9V9E3	27.4616	12.7733	-1.10429	1.10429	-53.4869	0.465131	0	0.0101263	0.00629809	5	0.253902	A0A0B4LES3;Q9V9E3,Q9V9E3	A0A0B4LES3_DROME;PREP_DROME,PREP_DROME	CG3107, isoform D;Presequence protease, mitochondrial,Presequence protease, mitochondrial	CG3107	A0A0B4LES3;Q9V9E3,Q9V9E3	Drosophila melanogaster	tr;sp,sp		3;2,2	1;2,2	uniprot-drosophila_reviewed_unreviewed_0825_2016	>tr|A0A0B4LES3|A0A0B4LES3_DROME CG3107, isoform D OS=Drosophila melanogaster GN=CG3107 PE=3 SV=1;>sp|Q9V9E3|PREP_DROME Presequence protease, mitochondrial OS=Drosophila melanogaster GN=CG3107 PE=2 SV=2,>sp|Q9V9E3|PREP_DROME Presequence protease, mitochondrial OS=Drosophila melanogaster GN=CG3107 PE=2 SV=2	1	1
TRUE	Contr / Rep	Contr	Rep	13	Q8SZ19;Q9W414	120.193	94.1433	-0.352423	0.352423	-21.6732	0.783268	0	0.0103037	0.00638893	12	0.231752	Q8SZ19;Q9W414	Q8SZ19_DROME;Q9W414_DROME	RE23388p;Regulatory particle triple-A ATPase 4	Rpt4	Q8SZ19;Q9W414	Drosophila melanogaster	tr		2;1	1;3	uniprot-drosophila_reviewed_unreviewed_0825_2016	>tr|Q8SZ19|Q8SZ19_DROME RE23388p OS=Drosophila melanogaster GN=Rpt4 PE=2 SV=1;>tr|Q9W414|Q9W414_DROME Regulatory particle triple-A ATPase 4 OS=Drosophila melanogaster GN=Rpt4 PE=1 SV=3	2	3
TRUE	Contr / Rep	Contr	Rep	6	Q95RB2	291.144	418.586	0.523793	0.523793	43.7731	1.43773	0	0.0104772	0.00647684	5	0.122593	Q95RB2	Q95RB2_DROME	Cuticular protein 49Ae	Cpr49Ae	Q95RB2	Drosophila melanogaster	tr		1	1	uniprot-drosophila_reviewed_unreviewed_0825_2016	>tr|Q95RB2|Q95RB2_DROME Cuticular protein 49Ae OS=Drosophila melanogaster GN=Cpr49Ae PE=1 SV=1	1	1
TRUE	Contr / Rep	Contr	Rep	12	Q9VII9;X2J9A5	132.323	33.6475	-1.97549	1.97549	-74.5716	0.254284	0	0.0105731	0.00651638	11	0.806562	Q9VII9;X2J9A5	Q9VII9_DROME;X2J9A5_DROME	LD14730p;Uncharacterized protein, isoform B	CG31673	Q9VII9;X2J9A5	Drosophila melanogaster	tr		1	2;1	uniprot-drosophila_reviewed_unreviewed_0825_2016	>tr|Q9VII9|Q9VII9_DROME LD14730p OS=Drosophila melanogaster GN=CG31673 PE=1 SV=2;>tr|X2J9A5|X2J9A5_DROME Uncharacterized protein, isoform B OS=Drosophila melanogaster GN=CG31673 PE=1 SV=1	2	2
TRUE	Contr / Rep	Contr	Rep	117	C7LA75;P11147	51377.7	36044.7	-0.511358	0.511358	-29.8438	0.701562	0	0.0106555	0.00654734	116	0.072336	C7LA75;P11147,P11147	C7LA75_DROME;HSP7D_DROME,HSP7D_DROME	Heat shock protein cognate 4, isoform G;Heat shock 70 kDa protein cognate 4,Heat shock 70 kDa protein cognate 4	Hsc70-4	C7LA75;P11147,P11147	Drosophila melanogaster	tr;sp,sp		1	1;3,3	uniprot-drosophila_reviewed_unreviewed_0825_2016	>tr|C7LA75|C7LA75_DROME Heat shock protein cognate 4, isoform G OS=Drosophila melanogaster GN=Hsc70-4 PE=1 SV=1;>sp|P11147|HSP7D_DROME Heat shock 70 kDa protein cognate 4 OS=Drosophila melanogaster GN=Hsc70-4 PE=1 SV=3,>sp|P11147|HSP7D_DROME Heat shock 70 kDa protein cognate 4 OS=Drosophila melanogaster GN=Hsc70-4 PE=1 SV=3	14	21
TRUE	Contr / Rep	Contr	Rep	12	B3MLA8;B3NA78;B4GSC0;B4I2S0;B4JZG4;B4KIE3;B4LQD3;B4N002;B4Q8M1;E4NKJ9;M9PEA6;O76927;Q29KF5;Q6XIR2	3161.18	2267.36	-0.47945	0.47945	-28.2749	0.717251	0	0.0107241	0.00656974	11	0.155661	B3MLA8;B3NA78;B4GSC0;B4I2S0;B4JZG4;B4KIE3;B4LQD3;B4N002;B4Q8M1;E4NKJ9;M9PEA6;O76927,O76927;Q29KF5;Q6XIR2	RS21_DROAN;RS21_DROER;RS21_DROPE;RS21_DROSE;RS21_DROGR;RS21_DROMO;RS21_DROVI;RS21_DROWI;RS21_DROSI;E4NKJ9_DROME;M9PEA6_DROME;RS21_DROME,RS21_DROME;RS21_DROPS;RS21_DROYA	40S ribosomal protein S21;40S ribosomal protein S21;40S ribosomal protein S21;40S ribosomal protein S21;40S ribosomal protein S21;40S ribosomal protein S21;40S ribosomal protein S21;40S ribosomal protein S21;40S ribosomal protein S21;GM24606p (Fragment);40S ribosomal protein S21;40S ribosomal protein S21,40S ribosomal protein S21;40S ribosomal protein S21;40S ribosomal protein S21	RpS21;RpS21;RpS21;RpS21;RpS21;RpS21;RpS21;RpS21;RpS21;oho23B-RE;RpS21;RpS21,RpS21;RpS21;RpS21	B3MLA8;B3NA78;B4GSC0;B4I2S0;B4JZG4;B4KIE3;B4LQD3;B4N002;B4Q8M1;E4NKJ9;M9PEA6;O76927,O76927;Q29KF5;Q6XIR2	Drosophila ananassae;Drosophila erecta;Drosophila persimilis;Drosophila sechellia;Drosophila grimshawi;Drosophila mojavensis;Drosophila virilis;Drosophila willistoni;Drosophila simulans;Drosophila melanogaster;Drosophila melanogaster;Drosophila melanogaster,Drosophila melanogaster;Drosophila pseudoobscura pseudoobscura;Drosophila yakuba	sp;sp;sp;sp;sp;sp;sp;sp;sp;tr;tr;sp,sp;sp;sp		3;3;3;3;3;3;3;3;3;2;1;1,1;3;3	1;1;1;1;2;1;2;1;1;1;1;1,1;2;1	uniprot-drosophila_reviewed_unreviewed_0825_2016	>sp|B3MLA8|RS21_DROAN 40S ribosomal protein S21 OS=Drosophila ananassae GN=RpS21 PE=3 SV=1;>sp|B3NA78|RS21_DROER 40S ribosomal protein S21 OS=Drosophila erecta GN=RpS21 PE=3 SV=1;>sp|B4GSC0|RS21_DROPE 40S ribosomal protein S21 OS=Drosophila persimilis GN=RpS21 PE=3 SV=1;>sp|B4I2S0|RS21_DROSE 40S ribosomal protein S21 OS=Drosophila sechellia GN=RpS21 PE=3 SV=1;>sp|B4JZG4|RS21_DROGR 40S ribosomal p…	2	2
TRUE	Contr / Rep	Contr	Rep	12	M9PF14;M9PF20;M9PI44;Q9VTZ0	105.913	34.0492	-1.63718	1.63718	-67.8516	0.321484	0	0.0111053	0.00678288	11	0.315142	M9PF14;M9PF20;M9PI44;Q9VTZ0	M9PF14_DROME;M9PF20_DROME;M9PI44_DROME;Q9VTZ0_DROME	Trailer hitch, isoform C;Trailer hitch, isoform H;Trailer hitch, isoform F;GH08269p	tral	M9PF14;M9PF20;M9PI44;Q9VTZ0	Drosophila melanogaster	tr		1	1;1;1;3	uniprot-drosophila_reviewed_unreviewed_0825_2016	>tr|M9PF14|M9PF14_DROME Trailer hitch, isoform C OS=Drosophila melanogaster GN=tral PE=1 SV=1;>tr|M9PF20|M9PF20_DROME Trailer hitch, isoform H OS=Drosophila melanogaster GN=tral PE=1 SV=1;>tr|M9PI44|M9PI44_DROME Trailer hitch, isoform F OS=Drosophila melanogaster GN=tral PE=1 SV=1;>tr|Q9VTZ0|Q9VTZ0_DROME GH08269p OS=Drosophila melanogaster GN=tral PE=1 SV=3	2	2
TRUE	Contr / Rep	Contr	Rep	24	Q9VHX4	1346.75	1518.59	0.173246	0.173246	12.7593	1.12759	0	0.0112163	0.00680992	23	0.124323	Q9VHX4	Q9VHX4_DROME	CG2767	CG2767	Q9VHX4	Drosophila melanogaster	tr		1	1	uniprot-drosophila_reviewed_unreviewed_0825_2016	>tr|Q9VHX4|Q9VHX4_DROME CG2767 OS=Drosophila melanogaster GN=CG2767 PE=1 SV=1	4	4
TRUE	Contr / Rep	Contr	Rep	24	Q9VRL1	1812.27	2113.34	0.221722	0.221722	16.6125	1.16612	0	0.0111893	0.00680992	23	0.167415	Q9VRL1	Q9VRL1_DROME	LD28904p	Uev1A	Q9VRL1	Drosophila melanogaster	tr		1	1	uniprot-drosophila_reviewed_unreviewed_0825_2016	>tr|Q9VRL1|Q9VRL1_DROME LD28904p OS=Drosophila melanogaster GN=Uev1A PE=1 SV=1	5	5
TRUE	Contr / Rep	Contr	Rep	12	B4F5F0;B4F5F3;B4F5F4;B4F5F5;B4F5F8;C0MLC9;C0MLD8;Q9VYG8	53.3807	141.379	1.40518	1.40518	164.851	2.64851	0	0.0112935	0.00683645	11	0.280351	B4F5F0;B4F5F3;B4F5F4;B4F5F5;B4F5F8;C0MLC9;C0MLD8;Q9VYG8	B4F5F0_DROME;B4F5F3_DROME;B4F5F4_DROME;B4F5F5_DROME;B4F5F8_DROME;C0MLC9_DROME;C0MLD8_DROME;Q9VYG8_DROME	CG15717-PA	CG15717	B4F5F0;B4F5F3;B4F5F4;B4F5F5;B4F5F8;C0MLC9;C0MLD8;Q9VYG8	Drosophila melanogaster	tr		4;4;4;4;4;4;4;1	1	uniprot-drosophila_reviewed_unreviewed_0825_2016	>tr|B4F5F0|B4F5F0_DROME CG15717-PA OS=Drosophila melanogaster GN=CG15717 PE=4 SV=1;>tr|B4F5F3|B4F5F3_DROME CG15717-PA OS=Drosophila melanogaster GN=CG15717 PE=4 SV=1;>tr|B4F5F4|B4F5F4_DROME CG15717-PA OS=Drosophila melanogaster GN=CG15717 PE=4 SV=1;>tr|B4F5F5|B4F5F5_DROME CG15717-PA OS=Drosophila melanogaster GN=CG15717 PE=4 SV=1;>tr|B4F5F8|B4F5F8_DROME CG15717-PA OS=Drosophila melanogaster GN=CG…	2	2
TRUE	Contr / Rep	Contr	Rep	6	C6TP91;Q4QPZ7;Q9VC53	3.97551	2.17802	-0.868123	0.868123	-45.2141	0.547859	0	0.0114504	0.0069109	5	0.227992	C6TP91;Q4QPZ7;Q9VC53	C6TP91_DROME;Q4QPZ7_DROME;Q9VC53_DROME	IP05996p (Fragment);IP05796p1 (Fragment);Uncharacterized protein	CG31126-RA;CG31126-RA;CG31126	C6TP91;Q4QPZ7;Q9VC53	Drosophila melanogaster	tr		2;2;3	1;1;2	uniprot-drosophila_reviewed_unreviewed_0825_2016	>tr|C6TP91|C6TP91_DROME IP05996p (Fragment) OS=Drosophila melanogaster GN=CG31126-RA PE=2 SV=1;>tr|Q4QPZ7|Q4QPZ7_DROME IP05796p1 (Fragment) OS=Drosophila melanogaster GN=CG31126-RA PE=2 SV=1;>tr|Q9VC53|Q9VC53_DROME Uncharacterized protein OS=Drosophila melanogaster GN=CG31126 PE=3 SV=2	1	1
TRUE	Contr / Rep	Contr	Rep	6	B4IG61;B4R4E9;M9PEI9;Q9VY93	58.6391	74.0123	0.335903	0.335903	26.2167	1.26217	0	0.011513	0.00692818	5	0.0833993	B4IG61;B4R4E9;M9PEI9;Q9VY93,Q9VY93	MTNB_DROSE;MTNB_DROSI;M9PEI9_DROME;MTNB_DROME,MTNB_DROME	Probable methylthioribulose-1-phosphate dehydratase	GM17635;GD17142;CG11134;CG11134,CG11134	B4IG61;B4R4E9;M9PEI9;Q9VY93,Q9VY93	Drosophila sechellia;Drosophila simulans;Drosophila melanogaster;Drosophila melanogaster,Drosophila melanogaster	sp;sp;tr;sp,sp		3;3;3;2,2	1	uniprot-drosophila_reviewed_unreviewed_0825_2016	>sp|B4IG61|MTNB_DROSE Probable methylthioribulose-1-phosphate dehydratase OS=Drosophila sechellia GN=GM17635 PE=3 SV=1;>sp|B4R4E9|MTNB_DROSI Probable methylthioribulose-1-phosphate dehydratase OS=Drosophila simulans GN=GD17142 PE=3 SV=1;>tr|M9PEI9|M9PEI9_DROME Probable methylthioribulose-1-phosphate dehydratase OS=Drosophila melanogaster GN=CG11134 PE=3 SV=1;>sp|Q9VY93|MTNB_DROME Probable methylt…	1	1
TRUE	Contr / Rep	Contr	Rep	12	Q9VBT2	89.0796	58.2125	-0.613766	0.613766	-34.6511	0.653489	0	0.0116671	0.00700024	11	0.15949	Q9VBT2	Q9VBT2_DROME	IP11926p	CG11893	Q9VBT2	Drosophila melanogaster	tr		1	1	uniprot-drosophila_reviewed_unreviewed_0825_2016	>tr|Q9VBT2|Q9VBT2_DROME IP11926p OS=Drosophila melanogaster GN=CG11893 PE=1 SV=1	2	2
TRUE	Contr / Rep	Contr	Rep	12	Q9VV75	180.154	144.557	-0.317591	0.317591	-19.7591	0.802409	0	0.0119042	0.00710077	11	0.196357	Q9VV75	Q9VV75_DROME	AT02348p	UQCR-C2	Q9VV75	Drosophila melanogaster	tr		1	1	uniprot-drosophila_reviewed_unreviewed_0825_2016	>tr|Q9VV75|Q9VV75_DROME AT02348p OS=Drosophila melanogaster GN=UQCR-C2 PE=1 SV=1	3	3
TRUE	Contr / Rep	Contr	Rep	6	A0A0B4KHS9;B4F4X2;C0MKX3;H5V895;P12982;P48461;P48462;P62143;Q05547;Q5K375;Q5LJN2;Q8SWU9;Q8T0U6	115.174	165.544	0.523408	0.523408	43.7347	1.43735	0	0.0118724	0.00710077	5	0.129635	A0A0B4KHS9;B4F4X2;C0MKX3;H5V895;P12982,P12982;P48461,P48461;P48462,P48462;P62143;Q05547,Q05547;Q5K375;Q5LJN2;Q8SWU9;Q8T0U6	A0A0B4KHS9_DROME;B4F4X2_DROME;C0MKX3_DROME;H5V895_DROME;PP12_DROME,PP12_DROME;PP11_DROME,PP11_DROME;PP1B_DROME,PP1B_DROME;PP1B_RABIT;PP13_DROME,PP13_DROME;Q5K375_DROME;Q5LJN2_DROME;Q8SWU9_DROME;Q8T0U6_DROME	Serine/threonine-protein phosphatase;Serine/threonine-protein phosphatase;Serine/threonine-protein phosphatase;Serine/threonine-protein phosphatase;Serine/threonine-protein phosphatase alpha-2 isoform,Serine/threonine-protein phosphatase alpha-2 isoform;Serine/threonine-protein phosphatase alpha-1 isoform,Serine/threonine-protein phosphatase alpha-1 isoform;Serine/threonine-protein phosphatase be…	Pp1alpha-96A;CG9156;CG9156;flw;Pp1-87B,Pp1-87B;Pp1alpha-96A,Pp1alpha-96A;flw,flw;PPP1CB;Pp1-13C,Pp1-13C;Pp1-Y2;Pp1-Y2;flw;flw	A0A0B4KHS9;B4F4X2;C0MKX3;H5V895;P12982,P12982;P48461,P48461;P48462,P48462;P62143;Q05547,Q05547;Q5K375;Q5LJN2;Q8SWU9;Q8T0U6	Drosophila melanogaster;Drosophila melanogaster;Drosophila melanogaster;Drosophila melanogaster;Drosophila melanogaster,Drosophila melanogaster;Drosophila melanogaster,Drosophila melanogaster;Drosophila melanogaster,Drosophila melanogaster;Oryctolagus cuniculus;Drosophila melanogaster,Drosophila melanogaster;Drosophila melanogaster;Drosophila melanogaster;Drosophila melanogaster;Drosophila melano…	tr;tr;tr;tr;sp,sp;sp,sp;sp,sp;sp;sp,sp;tr;tr;tr;tr		3;3;3;1;1,1;1,1;1,1;1;1,1;3;2;2;1	1;1;1;1;1,1;1,1;1,1;3;1,1;1;4;1;1	uniprot-drosophila_reviewed_unreviewed_0825_2016	>tr|A0A0B4KHS9|A0A0B4KHS9_DROME Serine/threonine-protein phosphatase OS=Drosophila melanogaster GN=Pp1alpha-96A PE=3 SV=1;>tr|B4F4X2|B4F4X2_DROME Serine/threonine-protein phosphatase OS=Drosophila melanogaster GN=CG9156 PE=3 SV=1;>tr|C0MKX3|C0MKX3_DROME Serine/threonine-protein phosphatase OS=Drosophila melanogaster GN=CG9156 PE=3 SV=1;>tr|H5V895|H5V895_DROME Serine/threonine-protein phosphatase …	1	1
TRUE	Contr / Rep	Contr	Rep	6	Q9VVM2	77.929	24.6553	-1.66026	1.66026	-68.3618	0.316382	0	0.0121171	0.00718939	5	0.542061	Q9VVM2	Q9VVM2_DROME	CG5506	CG5506	Q9VVM2	Drosophila melanogaster	tr		1	1	uniprot-drosophila_reviewed_unreviewed_0825_2016	>tr|Q9VVM2|Q9VVM2_DROME CG5506 OS=Drosophila melanogaster GN=CG5506 PE=1 SV=1	1	1
TRUE	Contr / Rep	Contr	Rep	6	Q5BI37;Q9NG24;Q9V9T4;Q9Y0W1	92951	32484.8	-1.5167	1.5167	-65.0517	0.349483	0	0.0121233	0.00718939	5	0.346312	Q5BI37;Q9NG24;Q9V9T4;Q9Y0W1	Q5BI37_DROME;Q9NG24_DROME;Q9V9T4_DROME;Q9Y0W1_DROME	LD32807p (Fragment);Chromatin accessibility complex (CHRAC);ATP-dependent chromatin assembly factor large subunit;ATP-dependent chromatin assembly factor large subunit	Acf	Q5BI37;Q9NG24;Q9V9T4;Q9Y0W1	Drosophila melanogaster	tr		2;2;1;2	1	uniprot-drosophila_reviewed_unreviewed_0825_2016	>tr|Q5BI37|Q5BI37_DROME LD32807p (Fragment) OS=Drosophila melanogaster GN=Acf PE=2 SV=1;>tr|Q9NG24|Q9NG24_DROME Chromatin accessibility complex (CHRAC) OS=Drosophila melanogaster GN=Acf PE=2 SV=1;>tr|Q9V9T4|Q9V9T4_DROME ATP-dependent chromatin assembly factor large subunit OS=Drosophila melanogaster GN=Acf PE=1 SV=1;>tr|Q9Y0W1|Q9Y0W1_DROME ATP-dependent chromatin assembly factor large subunit OS=…	1	1
TRUE	Contr / Rep	Contr	Rep	12	Q6NN12;Q8ML70	62.0505	93.6028	0.59311	0.59311	50.8495	1.5085	0	0.0122744	0.00725791	11	0.168894	Q6NN12;Q8ML70,Q8ML70	Q6NN12_DROME;IMPP_DROME,IMPP_DROME	HL05792p (Fragment);Immune-induced peptides,Immune-induced peptides	CG18279;IMPP,IMPP	Q6NN12;Q8ML70,Q8ML70	Drosophila melanogaster	tr;sp,sp		2;1,1	1;3,3	uniprot-drosophila_reviewed_unreviewed_0825_2016	>tr|Q6NN12|Q6NN12_DROME HL05792p (Fragment) OS=Drosophila melanogaster GN=CG18279 PE=2 SV=1;>sp|Q8ML70|IMPP_DROME Immune-induced peptides OS=Drosophila melanogaster GN=IMPP PE=1 SV=3,>sp|Q8ML70|IMPP_DROME Immune-induced peptides OS=Drosophila melanogaster GN=IMPP PE=1 SV=3	2	2
TRUE	Contr / Rep	Contr	Rep	12	Q9VVU2	779.728	304.275	-1.3576	1.3576	-60.9768	0.390232	0	0.0126808	0.00747656	11	0.423672	Q9VVU2	Q9VVU2_DROME	RE17611p	RpL26	Q9VVU2	Drosophila melanogaster	tr		1	1	uniprot-drosophila_reviewed_unreviewed_0825_2016	>tr|Q9VVU2|Q9VVU2_DROME RE17611p OS=Drosophila melanogaster GN=RpL26 PE=1 SV=1	2	2
TRUE	Contr / Rep	Contr	Rep	6	Q7KK90	90.0293	136.294	0.598251	0.598251	51.388	1.51388	0	0.0128025	0.00751574	5	0.146818	Q7KK90	Q7KK90_DROME	GH14654p	GstE1	Q7KK90	Drosophila melanogaster	tr		1	1	uniprot-drosophila_reviewed_unreviewed_0825_2016	>tr|Q7KK90|Q7KK90_DROME GH14654p OS=Drosophila melanogaster GN=GstE1 PE=1 SV=1	1	1
TRUE	Contr / Rep	Contr	Rep	6	Q29QY5;Q8IGD0;Q9TW62;Q9VBI2	37.3594	26.757	-0.481558	0.481558	-28.3796	0.716204	0	0.012821	0.00751574	5	0.131773	Q29QY5;Q8IGD0;Q9TW62;Q9VBI2	Q29QY5_DROME;Q8IGD0_DROME;Q9TW62_DROME;Q9VBI2_DROME	IP15841p (Fragment);RH52725p (Fragment);UMP-CMP kinase;UMP-CMP kinase	;Dak1;Dak1;Dak1	Q29QY5;Q8IGD0;Q9TW62;Q9VBI2	Drosophila melanogaster	tr		2;2;2;1	1	uniprot-drosophila_reviewed_unreviewed_0825_2016	>tr|Q29QY5|Q29QY5_DROME IP15841p (Fragment) OS=Drosophila melanogaster PE=2 SV=1;>tr|Q8IGD0|Q8IGD0_DROME RH52725p (Fragment) OS=Drosophila melanogaster GN=Dak1 PE=2 SV=1;>tr|Q9TW62|Q9TW62_DROME UMP-CMP kinase OS=Drosophila melanogaster GN=Dak1 PE=2 SV=1;>tr|Q9VBI2|Q9VBI2_DROME UMP-CMP kinase OS=Drosophila melanogaster GN=Dak1 PE=1 SV=1	1	1
TRUE	Contr / Rep	Contr	Rep	12	O62621	87.6228	45.0292	-0.960447	0.960447	-48.6102	0.513898	0	0.0128995	0.00754011	11	0.305603	O62621	COPB2_DROME	Coatomer subunit beta'	beta'COP	O62621	Drosophila melanogaster	sp		2	2	uniprot-drosophila_reviewed_unreviewed_0825_2016	>sp|O62621|COPB2_DROME Coatomer subunit beta' OS=Drosophila melanogaster GN=beta'COP PE=2 SV=2,>sp|O62621|COPB2_DROME Coatomer subunit beta' OS=Drosophila melanogaster GN=beta'COP PE=2 SV=2	2	2
TRUE	Contr / Rep	Contr	Rep	18	A4VA91;Q8SY60;Q9VK39	166.099	348.839	1.07052	1.07052	110.019	2.10019	0	0.0129875	0.00756988	17	0.241358	A4VA91;Q8SY60;Q9VK39	A4VA91_DROME;Q8SY60_DROME;Q9VK39_DROME	CG9928 protein (Fragment);RH70154p;CG9928, isoform A	CG9928;CG9928;CG9928-RA	A4VA91;Q8SY60;Q9VK39	Drosophila melanogaster	tr		4;2;1	1	uniprot-drosophila_reviewed_unreviewed_0825_2016	>tr|A4VA91|A4VA91_DROME CG9928 protein (Fragment) OS=Drosophila melanogaster GN=CG9928 PE=4 SV=1;>tr|Q8SY60|Q8SY60_DROME RH70154p OS=Drosophila melanogaster GN=CG9928 PE=2 SV=1;>tr|Q9VK39|Q9VK39_DROME CG9928, isoform A OS=Drosophila melanogaster GN=CG9928-RA PE=1 SV=1	2	3
TRUE	Contr / Rep	Contr	Rep	18	Q8SXG0;Q9VX69	434.118	988.564	1.18725	1.18725	127.718	2.27718	0	0.0131927	0.00765227	17	0.323291	Q8SXG0;Q9VX69	Q8SXG0_DROME;Q9VX69_DROME	RH13728p;CG5162, isoform A	CG5162	Q8SXG0;Q9VX69	Drosophila melanogaster	tr		2;1	1	uniprot-drosophila_reviewed_unreviewed_0825_2016	>tr|Q8SXG0|Q8SXG0_DROME RH13728p OS=Drosophila melanogaster GN=CG5162 PE=2 SV=1;>tr|Q9VX69|Q9VX69_DROME CG5162, isoform A OS=Drosophila melanogaster GN=CG5162 PE=1 SV=1	3	3
TRUE	Contr / Rep	Contr	Rep	60	B7Z0X1;Q9W457	14648.8	19796.9	0.434488	0.434488	35.1431	1.35143	0	0.0132039	0.00765227	59	0.132907	B7Z0X1;Q9W457	B7Z0X1_DROME;Q9W457_DROME	Serine hydroxymethyltransferase	CG3011	B7Z0X1;Q9W457	Drosophila melanogaster	tr		1	1	uniprot-drosophila_reviewed_unreviewed_0825_2016	>tr|B7Z0X1|B7Z0X1_DROME Serine hydroxymethyltransferase OS=Drosophila melanogaster GN=CG3011 PE=1 SV=1;>tr|Q9W457|Q9W457_DROME Serine hydroxymethyltransferase OS=Drosophila melanogaster GN=CG3011 PE=1 SV=1	8	11
TRUE	Contr / Rep	Contr	Rep	42	Q9VEJ0	12453	11376	-0.130505	0.130505	-8.64882	0.913512	0	0.0135213	0.00781401	41	0.076935	Q9VEJ0	Q9VEJ0_DROME	Peroxiredoxin 3	Prx3	Q9VEJ0	Drosophila melanogaster	tr		1	2	uniprot-drosophila_reviewed_unreviewed_0825_2016	>tr|Q9VEJ0|Q9VEJ0_DROME Peroxiredoxin 3 OS=Drosophila melanogaster GN=Prx3 PE=1 SV=2	5	7
TRUE	Contr / Rep	Contr	Rep	6	Q9VDT5	30.1592	19.116	-0.657819	0.657819	-36.6164	0.633836	0	0.0137282	0.00790945	5	0.167226	Q9VDT5	Q9VDT5_DROME	Carboxypeptidase	CG4572-RC	Q9VDT5	Drosophila melanogaster	tr		1	1	uniprot-drosophila_reviewed_unreviewed_0825_2016	>tr|Q9VDT5|Q9VDT5_DROME Carboxypeptidase OS=Drosophila melanogaster GN=CG4572-RC PE=1 SV=1	1	1
TRUE	Contr / Rep	Contr	Rep	6	P55841;Q5BIL1;Q5U0W4;Q95ZE8	2494.49	1586.8	-0.652619	0.652619	-36.3876	0.636124	0	0.013764	0.00790945	5	0.159644	P55841,P55841;Q5BIL1;Q5U0W4;Q95ZE8	RL14_DROME,RL14_DROME;Q5BIL1_DROME;Q5U0W4_DROME;RL14_DROVI	60S ribosomal protein L14,60S ribosomal protein L14;RH72463p (Fragment);GM06787p (Fragment);60S ribosomal protein L14	RpL14,RpL14;RpL14;;RpL14	P55841,P55841;Q5BIL1;Q5U0W4;Q95ZE8	Drosophila melanogaster,Drosophila melanogaster;Drosophila melanogaster;Drosophila melanogaster;Drosophila virilis	sp,sp;tr;tr;sp		1,1;2;2;3	1	uniprot-drosophila_reviewed_unreviewed_0825_2016	>sp|P55841|RL14_DROME 60S ribosomal protein L14 OS=Drosophila melanogaster GN=RpL14 PE=1 SV=1,>sp|P55841|RL14_DROME 60S ribosomal protein L14 OS=Drosophila melanogaster GN=RpL14 PE=1 SV=1;>tr|Q5BIL1|Q5BIL1_DROME RH72463p (Fragment) OS=Drosophila melanogaster GN=RpL14 PE=2 SV=1;>tr|Q5U0W4|Q5U0W4_DROME GM06787p (Fragment) OS=Drosophila melanogaster PE=2 SV=1;>sp|Q95ZE8|RL14_DROVI 60S ribosomal prot…	1	1
TRUE	Contr / Rep	Contr	Rep	6	P55828	2003.69	965.895	-1.05272	1.05272	-51.7943	0.482057	0	0.013897	0.00796344	5	0.263712	P55828	RS20_DROME	40S ribosomal protein S20	RpS20	P55828	Drosophila melanogaster	sp		1	1	uniprot-drosophila_reviewed_unreviewed_0825_2016	>sp|P55828|RS20_DROME 40S ribosomal protein S20 OS=Drosophila melanogaster GN=RpS20 PE=1 SV=1,>sp|P55828|RS20_DROME 40S ribosomal protein S20 OS=Drosophila melanogaster GN=RpS20 PE=1 SV=1	1	1
TRUE	Contr / Rep	Contr	Rep	6	Q70PY2	52.6768	15.9616	-1.72256	1.72256	-69.699	0.30301	0	0.0139738	0.00798503	5	0.397115	Q70PY2	PGSB1_DROME	Peptidoglycan-recognition protein SB1	PGRP-SB1	Q70PY2	Drosophila melanogaster	sp		2	2	uniprot-drosophila_reviewed_unreviewed_0825_2016	>sp|Q70PY2|PGSB1_DROME Peptidoglycan-recognition protein SB1 OS=Drosophila melanogaster GN=PGRP-SB1 PE=2 SV=2,>sp|Q70PY2|PGSB1_DROME Peptidoglycan-recognition protein SB1 OS=Drosophila melanogaster GN=PGRP-SB1 PE=2 SV=2	1	1
TRUE	Contr / Rep	Contr	Rep	6	Q9VS21	8.98143	5.46109	-0.717757	0.717757	-39.1958	0.608042	0	0.0143421	0.00817261	5	0.199259	Q9VS21	Q9VS21_DROME	Uncharacterized protein, isoform A	CG15829	Q9VS21	Drosophila melanogaster	tr		1	1	uniprot-drosophila_reviewed_unreviewed_0825_2016	>tr|Q9VS21|Q9VS21_DROME Uncharacterized protein, isoform A OS=Drosophila melanogaster GN=CG15829 PE=1 SV=1	1	1
TRUE	Contr / Rep	Contr	Rep	12	Q8SXA6	63.222	41.3788	-0.611534	0.611534	-34.55	0.6545	0	0.0145721	0.00823463	11	0.147153	Q8SXA6	Q8SXA6_DROME	GH20168p	AOX3	Q8SXA6	Drosophila melanogaster	tr		2	1	uniprot-drosophila_reviewed_unreviewed_0825_2016	>tr|Q8SXA6|Q8SXA6_DROME GH20168p OS=Drosophila melanogaster GN=AOX3 PE=2 SV=1	2	2
TRUE	Contr / Rep	Contr	Rep	6	H5V8F3;Q9VN93	47.7419	39.4026	-0.276964	0.276964	-17.4674	0.825326	0	0.0145009	0.00823463	5	0.0748879	H5V8F3;Q9VN93,Q9VN93	H5V8F3_DROME;CPR1_DROME,CPR1_DROME	FI18603p1;Putative cysteine proteinase CG12163,Putative cysteine proteinase CG12163	CG12163-RB;CG12163,CG12163	H5V8F3;Q9VN93,Q9VN93	Drosophila melanogaster	tr;sp,sp		2	1;2,2	uniprot-drosophila_reviewed_unreviewed_0825_2016	>tr|H5V8F3|H5V8F3_DROME FI18603p1 OS=Drosophila melanogaster GN=CG12163-RB PE=2 SV=1;>sp|Q9VN93|CPR1_DROME Putative cysteine proteinase CG12163 OS=Drosophila melanogaster GN=CG12163 PE=2 SV=2,>sp|Q9VN93|CPR1_DROME Putative cysteine proteinase CG12163 OS=Drosophila melanogaster GN=CG12163 PE=2 SV=2	1	1
TRUE	Contr / Rep	Contr	Rep	9	Q7JVI6	197.746	57.3055	-1.7869	1.7869	-71.0207	0.289793	0	0.0145662	0.00823463	8	0.282227	Q7JVI6	Q7JVI6_DROME	Glutathione S transferase E13, isoform A	GstE13	Q7JVI6	Drosophila melanogaster	tr		1	1	uniprot-drosophila_reviewed_unreviewed_0825_2016	>tr|Q7JVI6|Q7JVI6_DROME Glutathione S transferase E13, isoform A OS=Drosophila melanogaster GN=GstE13 PE=1 SV=1	2	2
TRUE	Contr / Rep	Contr	Rep	48	A0A0B4K7G9;B7YZQ7	21674.3	19798.2	-0.130614	0.130614	-8.65575	0.913443	0	0.0148252	0.00835454	47	0.0680218	A0A0B4K7G9;B7YZQ7	A0A0B4K7G9_DROME;B7YZQ7_DROME	Nucleosome remodeling factor-38kD, isoform C;Nucleosome remodeling factor-38kD, isoform B	Nurf-38	A0A0B4K7G9;B7YZQ7	Drosophila melanogaster	tr		1	1	uniprot-drosophila_reviewed_unreviewed_0825_2016	>tr|A0A0B4K7G9|A0A0B4K7G9_DROME Nucleosome remodeling factor-38kD, isoform C OS=Drosophila melanogaster GN=Nurf-38 PE=1 SV=1;>tr|B7YZQ7|B7YZQ7_DROME Nucleosome remodeling factor-38kD, isoform B OS=Drosophila melanogaster GN=Nurf-38 PE=1 SV=1	8	9
TRUE	Contr / Rep	Contr	Rep	30	A9QJK9;A9QJL0;A9QJL5;A9QJL7;A9QJM6;A9QJM9;A9QJQ6;A9QJR7;A9QJU7;A9QJY0;A9QK28;D1FZ49;D1FZA2;D1FZD8	47071.6	62432	0.407429	0.407429	32.632	1.32632	0	0.0151396	0.00846157	29	0.0779721	A9QJK9;A9QJL0;A9QJL5;A9QJL7;A9QJM6;A9QJM9;A9QJQ6;A9QJR7;A9QJU7;A9QJY0;A9QK28;D1FZ49;D1FZA2;D1FZD8	A9QJK9_DROME;A9QJL0_DROME;A9QJL5_DROME;A9QJL7_DROME;A9QJM6_DROME;A9QJM9_DROME;A9QJQ6_DROME;A9QJR7_DROME;A9QJU7_DROME;A9QJY0_DROME;A9QK28_DROME;D1FZ49_DROME;D1FZA2_DROME;D1FZD8_DROME	Odorant-binding protein 99c	Obp99c	A9QJK9;A9QJL0;A9QJL5;A9QJL7;A9QJM6;A9QJM9;A9QJQ6;A9QJR7;A9QJU7;A9QJY0;A9QK28;D1FZ49;D1FZA2;D1FZD8	Drosophila melanogaster	tr		4	1	uniprot-drosophila_reviewed_unreviewed_0825_2016	>tr|A9QJK9|A9QJK9_DROME Odorant-binding protein 99c OS=Drosophila melanogaster GN=Obp99c PE=4 SV=1;>tr|A9QJL0|A9QJL0_DROME Odorant-binding protein 99c OS=Drosophila melanogaster GN=Obp99c PE=4 SV=1;>tr|A9QJL5|A9QJL5_DROME Odorant-binding protein 99c OS=Drosophila melanogaster GN=Obp99c PE=4 SV=1;>tr|A9QJL7|A9QJL7_DROME Odorant-binding protein 99c OS=Drosophila melanogaster GN=Obp99c PE=4 SV=1;>tr…	4	5
TRUE	Contr / Rep	Contr	Rep	6	A1Z892;Q7JX87;Q9GPQ1	895.987	1151.02	0.361368	0.361368	28.4644	1.28464	0	0.0151298	0.00846157	5	0.0994388	A1Z892;Q7JX87;Q9GPQ1	A1Z892_DROME;Q7JX87_DROME;Q9GPQ1_DROME	LD11278p;Peroxiredoxin 2540-2;1-cys peroxiredoxin DPx-2540-1	Prx2540-1;Prx2540-2;Prx2540-1	A1Z892;Q7JX87;Q9GPQ1	Drosophila melanogaster	tr		2;1;2	1	uniprot-drosophila_reviewed_unreviewed_0825_2016	>tr|A1Z892|A1Z892_DROME LD11278p OS=Drosophila melanogaster GN=Prx2540-1 PE=2 SV=1;>tr|Q7JX87|Q7JX87_DROME Peroxiredoxin 2540-2 OS=Drosophila melanogaster GN=Prx2540-2 PE=1 SV=1;>tr|Q9GPQ1|Q9GPQ1_DROME 1-cys peroxiredoxin DPx-2540-1 OS=Drosophila melanogaster GN=Prx2540-1 PE=2 SV=1	1	1
TRUE	Contr / Rep	Contr	Rep	18	M9NE01;Q27889	127.613	74.3363	-0.779633	0.779633	-41.7485	0.582515	0	0.015103	0.00846157	17	0.295316	M9NE01;Q27889,Q27889	M9NE01_DROME;PP2B2_DROME,PP2B2_DROME	Serine/threonine-protein phosphatase;Serine/threonine-protein phosphatase 2B catalytic subunit 2,Serine/threonine-protein phosphatase 2B catalytic subunit 2	Pp2B-14D	M9NE01;Q27889,Q27889	Drosophila melanogaster	tr;sp,sp		3;1,1	1;2,2	uniprot-drosophila_reviewed_unreviewed_0825_2016	>tr|M9NE01|M9NE01_DROME Serine/threonine-protein phosphatase OS=Drosophila melanogaster GN=Pp2B-14D PE=3 SV=1;>sp|Q27889|PP2B2_DROME Serine/threonine-protein phosphatase 2B catalytic subunit 2 OS=Drosophila melanogaster GN=Pp2B-14D PE=1 SV=2,>sp|Q27889|PP2B2_DROME Serine/threonine-protein phosphatase 2B catalytic subunit 2 OS=Drosophila melanogaster GN=Pp2B-14D PE=1 SV=2	3	3
TRUE	Contr / Rep	Contr	Rep	6	M9PE54;Q8SX02;Q9VQB3	38.0181	67.1852	0.821457	0.821457	76.719	1.76719	0	0.0153106	0.00853376	5	0.200501	M9PE54;Q8SX02;Q9VQB3	M9PE54_DROME;Q8SX02_DROME;Q9VQB3_DROME	CG3597, isoform B;RH42867p;CG3597, isoform A	CG3597;CG3597;CG3597-RA	M9PE54;Q8SX02;Q9VQB3	Drosophila melanogaster	tr		1;2;1	1	uniprot-drosophila_reviewed_unreviewed_0825_2016	>tr|M9PE54|M9PE54_DROME CG3597, isoform B OS=Drosophila melanogaster GN=CG3597 PE=1 SV=1;>tr|Q8SX02|Q8SX02_DROME RH42867p OS=Drosophila melanogaster GN=CG3597 PE=2 SV=1;>tr|Q9VQB3|Q9VQB3_DROME CG3597, isoform A OS=Drosophila melanogaster GN=CG3597-RA PE=1 SV=1	1	1
TRUE	Contr / Rep	Contr	Rep	12	A3FP35;Q86B44;Q8IQZ1	28.1131	37.747	0.425122	0.425122	34.2686	1.34269	0	0.0161302	0.00896609	11	0.142554	A3FP35;Q86B44;Q8IQZ1	A3FP35_DROME;Q86B44_DROME;Q8IQZ1_DROME	Glutathione synthetase	;GSS;GSS	A3FP35;Q86B44;Q8IQZ1	Drosophila melanogaster	tr		2;1;1	1;2;2	uniprot-drosophila_reviewed_unreviewed_0825_2016	>tr|A3FP35|A3FP35_DROME Glutathione synthetase OS=Drosophila melanogaster PE=2 SV=1;>tr|Q86B44|Q86B44_DROME Glutathione synthetase OS=Drosophila melanogaster GN=GSS PE=1 SV=2;>tr|Q8IQZ1|Q8IQZ1_DROME Glutathione synthetase OS=Drosophila melanogaster GN=GSS PE=1 SV=2	2	2
TRUE	Contr / Rep	Contr	Rep	6	Q0E8H9;Q8IRB6;Q8MSS9;Q95S03	228.367	304.639	0.415745	0.415745	33.3987	1.33399	0	0.0167707	0.00929679	5	0.115839	Q0E8H9;Q8IRB6;Q8MSS9;Q95S03	Q0E8H9_DROME;Q8IRB6_DROME;Q8MSS9_DROME;Q95S03_DROME	Hexosaminidase 1, isoform A;FI04413p;RE27784p;HL03862p	Hexo1	Q0E8H9;Q8IRB6;Q8MSS9;Q95S03	Drosophila melanogaster	tr		1;1;2;2	1	uniprot-drosophila_reviewed_unreviewed_0825_2016	>tr|Q0E8H9|Q0E8H9_DROME Hexosaminidase 1, isoform A OS=Drosophila melanogaster GN=Hexo1 PE=1 SV=1;>tr|Q8IRB6|Q8IRB6_DROME FI04413p OS=Drosophila melanogaster GN=Hexo1 PE=1 SV=1;>tr|Q8MSS9|Q8MSS9_DROME RE27784p OS=Drosophila melanogaster GN=Hexo1 PE=2 SV=1;>tr|Q95S03|Q95S03_DROME HL03862p OS=Drosophila melanogaster GN=Hexo1 PE=2 SV=1	1	1
TRUE	Contr / Rep	Contr	Rep	36	Q9U1K3	16019.8	21401	0.41782	0.41782	33.5907	1.33591	0	0.0168365	0.00930799	35	0.227002	Q9U1K3	Q9U1K3_DROME	Globin	glob1	Q9U1K3	Drosophila melanogaster	tr		3	1	uniprot-drosophila_reviewed_unreviewed_0825_2016	>tr|Q9U1K3|Q9U1K3_DROME Globin OS=Drosophila melanogaster GN=glob1 PE=3 SV=1	6	6
TRUE	Contr / Rep	Contr	Rep	6	Q9Y141	72.433	35.2205	-1.04023	1.04023	-51.375	0.48625	0	0.0169128	0.00932487	5	0.553727	Q9Y141	Q9Y141_DROME	Carboxylic ester hydrolase	BcDNA.GH05741	Q9Y141	Drosophila melanogaster	tr		1	1	uniprot-drosophila_reviewed_unreviewed_0825_2016	>tr|Q9Y141|Q9Y141_DROME Carboxylic ester hydrolase OS=Drosophila melanogaster GN=BcDNA.GH05741 PE=1 SV=1	1	1
TRUE	Contr / Rep	Contr	Rep	18	B7FNN6;P05389	3207.26	1989.96	-0.688605	0.688605	-37.9546	0.620454	0	0.0175558	0.00958627	17	0.184975	B7FNN6;P05389,P05389	B7FNN6_DROME;RLA2_DROME,RLA2_DROME	LP06614p (Fragment);60S acidic ribosomal protein P2,60S acidic ribosomal protein P2	RpLP2-RB;RpLP2,RpLP2	B7FNN6;P05389,P05389	Drosophila melanogaster	tr;sp,sp		2;1,1	1	uniprot-drosophila_reviewed_unreviewed_0825_2016	>tr|B7FNN6|B7FNN6_DROME LP06614p (Fragment) OS=Drosophila melanogaster GN=RpLP2-RB PE=2 SV=1;>sp|P05389|RLA2_DROME 60S acidic ribosomal protein P2 OS=Drosophila melanogaster GN=RpLP2 PE=1 SV=1,>sp|P05389|RLA2_DROME 60S acidic ribosomal protein P2 OS=Drosophila melanogaster GN=RpLP2 PE=1 SV=1	2	3
TRUE	Contr / Rep	Contr	Rep	12	Q9VD02	402.377	429.44	0.0939111	0.0939111	6.72596	1.06726	0	0.0174434	0.00958627	11	0.154946	Q9VD02	Q9VD02_DROME	CG7054	CG7054	Q9VD02	Drosophila melanogaster	tr		1	1	uniprot-drosophila_reviewed_unreviewed_0825_2016	>tr|Q9VD02|Q9VD02_DROME CG7054 OS=Drosophila melanogaster GN=CG7054 PE=1 SV=1	2	2
TRUE	Contr / Rep	Contr	Rep	13	Q4V5F8;Q8INL3	76.4523	170.826	1.1599	1.1599	123.442	2.23442	0	0.0175234	0.00958627	12	0.503493	Q4V5F8;Q8INL3	Q4V5F8_DROME;Q8INL3_DROME	Peptide deformylase (Fragment);Peptide deformylase	CG31373	Q4V5F8;Q8INL3	Drosophila melanogaster	tr		2;1	1	uniprot-drosophila_reviewed_unreviewed_0825_2016	>tr|Q4V5F8|Q4V5F8_DROME Peptide deformylase (Fragment) OS=Drosophila melanogaster GN=CG31373 PE=2 SV=1;>tr|Q8INL3|Q8INL3_DROME Peptide deformylase OS=Drosophila melanogaster GN=CG31373 PE=1 SV=1	2	3
TRUE	Contr / Rep	Contr	Rep	6	Q9VMA3;X2J9P9	11.0119	5.28719	-1.05849	1.05849	-51.9864	0.480136	0	0.0175748	0.00958627	5	0.298773	Q9VMA3,Q9VMA3;X2J9P9	CUP_DROME,CUP_DROME;X2J9P9_DROME	Protein cup,Protein cup;Cup, isoform C	cup	Q9VMA3,Q9VMA3;X2J9P9	Drosophila melanogaster	sp,sp;tr		1	3,3;1	uniprot-drosophila_reviewed_unreviewed_0825_2016	>sp|Q9VMA3|CUP_DROME Protein cup OS=Drosophila melanogaster GN=cup PE=1 SV=3,>sp|Q9VMA3|CUP_DROME Protein cup OS=Drosophila melanogaster GN=cup PE=1 SV=3;>tr|X2J9P9|X2J9P9_DROME Cup, isoform C OS=Drosophila melanogaster GN=cup PE=1 SV=1	1	1
TRUE	Contr / Rep	Contr	Rep	6	Q7K533	24.6071	39.0901	0.667731	0.667731	58.8572	1.58857	0	0.0178004	0.00963204	5	0.183005	Q7K533	Q7K533_DROME	GH14572p	Gbp2	Q7K533	Drosophila melanogaster	tr		1	1	uniprot-drosophila_reviewed_unreviewed_0825_2016	>tr|Q7K533|Q7K533_DROME GH14572p OS=Drosophila melanogaster GN=Gbp2 PE=1 SV=1	1	2
TRUE	Contr / Rep	Contr	Rep	24	P29742;X2JC31	183.517	160.807	-0.190581	0.190581	-12.3747	0.876253	0	0.0177955	0.00963204	23	0.148526	P29742,P29742;X2JC31	CLH_DROME,CLH_DROME;X2JC31_DROME	Clathrin heavy chain	Chc	P29742,P29742;X2JC31	Drosophila melanogaster	sp,sp;tr		1,1;3	1	uniprot-drosophila_reviewed_unreviewed_0825_2016	>sp|P29742|CLH_DROME Clathrin heavy chain OS=Drosophila melanogaster GN=Chc PE=1 SV=1,>sp|P29742|CLH_DROME Clathrin heavy chain OS=Drosophila melanogaster GN=Chc PE=1 SV=1;>tr|X2JC31|X2JC31_DROME Clathrin heavy chain OS=Drosophila melanogaster GN=Chc PE=3 SV=1	4	4
TRUE	Contr / Rep	Contr	Rep	6	M9PJP0;Q9VXK0	1761.93	2143.47	0.282791	0.282791	21.6546	1.21655	0	0.0177828	0.00963204	5	0.0753017	M9PJP0;Q9VXK0,Q9VXK0	M9PJP0_DROME;NIPSN_DROME,NIPSN_DROME	Nipsnap, isoform F;Protein NipSnap,Protein NipSnap	Nipsnap	M9PJP0;Q9VXK0,Q9VXK0	Drosophila melanogaster	tr;sp,sp		4;2,2	2	uniprot-drosophila_reviewed_unreviewed_0825_2016	>tr|M9PJP0|M9PJP0_DROME Nipsnap, isoform F OS=Drosophila melanogaster GN=Nipsnap PE=4 SV=2;>sp|Q9VXK0|NIPSN_DROME Protein NipSnap OS=Drosophila melanogaster GN=Nipsnap PE=2 SV=2,>sp|Q9VXK0|NIPSN_DROME Protein NipSnap OS=Drosophila melanogaster GN=Nipsnap PE=2 SV=2	1	1
TRUE	Contr / Rep	Contr	Rep	6	Q9VXJ0;X2JFD6	47.5803	33.9669	-0.486234	0.486234	-28.6114	0.713886	0	0.0178615	0.00963955	5	0.150785	Q9VXJ0,Q9VXJ0;X2JFD6	DHB4_DROME,DHB4_DROME;X2JFD6_DROME	Peroxisomal multifunctional enzyme type 2,Peroxisomal multifunctional enzyme type 2;Peroxisomal multifunctional enzyme type 2, isoform B	Mfe2	Q9VXJ0,Q9VXJ0;X2JFD6	Drosophila melanogaster	sp,sp;tr		1,1;4	1	uniprot-drosophila_reviewed_unreviewed_0825_2016	>sp|Q9VXJ0|DHB4_DROME Peroxisomal multifunctional enzyme type 2 OS=Drosophila melanogaster GN=Mfe2 PE=1 SV=1,>sp|Q9VXJ0|DHB4_DROME Peroxisomal multifunctional enzyme type 2 OS=Drosophila melanogaster GN=Mfe2 PE=1 SV=1;>tr|X2JFD6|X2JFD6_DROME Peroxisomal multifunctional enzyme type 2, isoform B OS=Drosophila melanogaster GN=Mfe2 PE=4 SV=1	1	1
TRUE	Contr / Rep	Contr	Rep	12	Q86BQ4;Q8STA5	4321.84	4403.49	0.0270033	0.0270033	1.88935	1.01889	0	0.0182844	0.00984171	11	0.100616	Q86BQ4;Q8STA5	Q86BQ4_DROME;Q8STA5_DROME	CG2862, isoform B;CG2862, isoform A	CG2862	Q86BQ4;Q8STA5	Drosophila melanogaster	tr		1	1	uniprot-drosophila_reviewed_unreviewed_0825_2016	>tr|Q86BQ4|Q86BQ4_DROME CG2862, isoform B OS=Drosophila melanogaster GN=CG2862 PE=1 SV=1;>tr|Q8STA5|Q8STA5_DROME CG2862, isoform A OS=Drosophila melanogaster GN=CG2862 PE=1 SV=1	2	2
TRUE	Contr / Rep	Contr	Rep	6	B3NVC6;B4IDV8;B4PYW0;P20351;Q24630	43.6053	89.4795	1.03705	1.03705	105.203	2.05203	0	0.0183799	0.00986712	5	0.274913	B3NVC6;B4IDV8;B4PYW0;P20351,P20351;Q24630	T23O_DROER;T23O_DROSE;T23O_DROYA;T23O_DROME,T23O_DROME;T23O_DROSI	Tryptophan 2,3-dioxygenase;Tryptophan 2,3-dioxygenase;Tryptophan 2,3-dioxygenase;Tryptophan 2,3-dioxygenase,Tryptophan 2,3-dioxygenase;Tryptophan 2,3-dioxygenase	v	B3NVC6;B4IDV8;B4PYW0;P20351,P20351;Q24630	Drosophila erecta;Drosophila sechellia;Drosophila yakuba;Drosophila melanogaster,Drosophila melanogaster;Drosophila simulans	sp		3;3;3;1,1;3	1	uniprot-drosophila_reviewed_unreviewed_0825_2016	>sp|B3NVC6|T23O_DROER Tryptophan 2,3-dioxygenase OS=Drosophila erecta GN=v PE=3 SV=1;>sp|B4IDV8|T23O_DROSE Tryptophan 2,3-dioxygenase OS=Drosophila sechellia GN=v PE=3 SV=1;>sp|B4PYW0|T23O_DROYA Tryptophan 2,3-dioxygenase OS=Drosophila yakuba GN=v PE=3 SV=1;>sp|P20351|T23O_DROME Tryptophan 2,3-dioxygenase OS=Drosophila melanogaster GN=v PE=1 SV=1,>sp|P20351|T23O_DROME Tryptophan 2,3-dioxygenase O…	1	1
TRUE	Contr / Rep	Contr	Rep	6	D3PFG8;P37159;P83971;P83972;Q08694	28.8748	8.38845	-1.78333	1.78333	-70.9489	0.290511	0	0.0185036	0.00990746	5	0.519795	D3PFG8;P37159,P37159;P83971,P83971;P83972,P83972;Q08694,Q08694	D3PFG8_DROME;LYSE_DROME,LYSE_DROME;LYSA_DROME,LYSA_DROME;LYSD_DROME,LYSD_DROME;LYSB_DROME,LYSB_DROME	Lysozyme B, isoform B;Lysozyme E,Lysozyme E;Lysozyme A/C,Lysozyme A/C;Lysozyme D,Lysozyme D;Lysozyme B,Lysozyme B	LysB;LysE,LysE;LysA,LysA;LysD,LysD;LysB,LysB	D3PFG8;P37159,P37159;P83971,P83971;P83972,P83972;Q08694,Q08694	Drosophila melanogaster	tr;sp,sp;sp,sp;sp,sp;sp,sp		2	1;2,2;1,1;1,1;2,2	uniprot-drosophila_reviewed_unreviewed_0825_2016	>tr|D3PFG8|D3PFG8_DROME Lysozyme B, isoform B OS=Drosophila melanogaster GN=LysB PE=2 SV=1;>sp|P37159|LYSE_DROME Lysozyme E OS=Drosophila melanogaster GN=LysE PE=2 SV=2,>sp|P37159|LYSE_DROME Lysozyme E OS=Drosophila melanogaster GN=LysE PE=2 SV=2;>sp|P83971|LYSA_DROME Lysozyme A/C OS=Drosophila melanogaster GN=LysA PE=2 SV=1,>sp|P83971|LYSA_DROME Lysozyme A/C OS=Drosophila melanogaster GN=LysA PE…	1	1
TRUE	Contr / Rep	Contr	Rep	6	A0A077HCQ5	1571.04	4148.94	1.40102	1.40102	164.089	2.64089	0	0.0185901	0.00992771	5	0.560098	A0A077HCQ5	A0A077HCQ5_DROME	Alcohol dehydrogenase (Fragment)	Adh	A0A077HCQ5	Drosophila melanogaster	tr		3	1	uniprot-drosophila_reviewed_unreviewed_0825_2016	>tr|A0A077HCQ5|A0A077HCQ5_DROME Alcohol dehydrogenase (Fragment) OS=Drosophila melanogaster GN=Adh PE=3 SV=1	1	1
TRUE	Contr / Rep	Contr	Rep	6	B4F5K6;B4F5L2;B4F5L3;C0MLI5;C0MLI6;C0MLI9;O76752	182.44	232.357	0.348924	0.348924	27.3611	1.27361	0	0.0186817	0.00995055	5	0.0970931	B4F5K6;B4F5L2;B4F5L3;C0MLI5;C0MLI6;C0MLI9;O76752	B4F5K6_DROME;B4F5L2_DROME;B4F5L3_DROME;C0MLI5_DROME;C0MLI6_DROME;C0MLI9_DROME;O76752_DROME	CG12117-PA	CG12117;CG12117;CG12117;CG12117;CG12117;CG12117;Sptr	B4F5K6;B4F5L2;B4F5L3;C0MLI5;C0MLI6;C0MLI9;O76752	Drosophila melanogaster	tr		4;4;4;4;4;4;1	1	uniprot-drosophila_reviewed_unreviewed_0825_2016	>tr|B4F5K6|B4F5K6_DROME CG12117-PA OS=Drosophila melanogaster GN=CG12117 PE=4 SV=1;>tr|B4F5L2|B4F5L2_DROME CG12117-PA OS=Drosophila melanogaster GN=CG12117 PE=4 SV=1;>tr|B4F5L3|B4F5L3_DROME CG12117-PA OS=Drosophila melanogaster GN=CG12117 PE=4 SV=1;>tr|C0MLI5|C0MLI5_DROME CG12117-PA OS=Drosophila melanogaster GN=CG12117 PE=4 SV=1;>tr|C0MLI6|C0MLI6_DROME CG12117-PA OS=Drosophila melanogaster GN=CG…	1	1
TRUE	Contr / Rep	Contr	Rep	44	Q9VD58	60623.1	50914.3	-0.251795	0.251795	-16.0149	0.839851	0	0.0194141	0.0103137	43	0.115368	Q9VD58	Q9VD58_DROME	CG6439, isoform A	CG6439	Q9VD58	Drosophila melanogaster	tr		1	1	uniprot-drosophila_reviewed_unreviewed_0825_2016	>tr|Q9VD58|Q9VD58_DROME CG6439, isoform A OS=Drosophila melanogaster GN=CG6439 PE=1 SV=1	6	8
TRUE	Contr / Rep	Contr	Rep	18	Q9VSU6	255.478	170.101	-0.586806	0.586806	-33.4185	0.665815	0	0.019688	0.0104253	17	0.246079	Q9VSU6	Q9VSU6_DROME	Dihydropteridine reductase	Dhpr	Q9VSU6	Drosophila melanogaster	tr		1	1	uniprot-drosophila_reviewed_unreviewed_0825_2016	>tr|Q9VSU6|Q9VSU6_DROME Dihydropteridine reductase OS=Drosophila melanogaster GN=Dhpr PE=1 SV=1	2	4
TRUE	Contr / Rep	Contr	Rep	6	Q9VL18	89.7648	73.4322	-0.289737	0.289737	-18.1949	0.818051	0	0.0197263	0.0104253	5	0.080119	Q9VL18	EF1D_DROME	Probable elongation factor 1-delta	eEF1delta	Q9VL18	Drosophila melanogaster	sp		1	1	uniprot-drosophila_reviewed_unreviewed_0825_2016	>sp|Q9VL18|EF1D_DROME Probable elongation factor 1-delta OS=Drosophila melanogaster GN=eEF1delta PE=1 SV=1,>sp|Q9VL18|EF1D_DROME Probable elongation factor 1-delta OS=Drosophila melanogaster GN=eEF1delta PE=1 SV=1	1	1
TRUE	Contr / Rep	Contr	Rep	18	Q9VV60	270.245	240.852	-0.166121	0.166121	-10.8764	0.891236	0	0.020341	0.0107224	17	0.0802238	Q9VV60	Q9VV60_DROME	Tyrosine--tRNA ligase	TyrRS	Q9VV60	Drosophila melanogaster	tr		1	1	uniprot-drosophila_reviewed_unreviewed_0825_2016	>tr|Q9VV60|Q9VV60_DROME Tyrosine--tRNA ligase OS=Drosophila melanogaster GN=TyrRS PE=1 SV=1	4	4
TRUE	Contr / Rep	Contr	Rep	30	Q8IRQ5;Q8SXM1;Q9W3X6	13167.6	9963.63	-0.402244	0.402244	-24.332	0.75668	0	0.0204903	0.0107455	29	0.193817	Q8IRQ5;Q8SXM1;Q9W3X6	Q8IRQ5_DROME;Q8SXM1_DROME;Q9W3X6_DROME	LP02262p;LD46083p;FI05334p	l(1)G0255	Q8IRQ5;Q8SXM1;Q9W3X6	Drosophila melanogaster	tr		1;2;1	1;1;3	uniprot-drosophila_reviewed_unreviewed_0825_2016	>tr|Q8IRQ5|Q8IRQ5_DROME LP02262p OS=Drosophila melanogaster GN=l(1)G0255 PE=1 SV=1;>tr|Q8SXM1|Q8SXM1_DROME LD46083p OS=Drosophila melanogaster GN=l(1)G0255 PE=2 SV=1;>tr|Q9W3X6|Q9W3X6_DROME FI05334p OS=Drosophila melanogaster GN=l(1)G0255 PE=1 SV=3	5	5
TRUE	Contr / Rep	Contr	Rep	12	Q9VIF2	157.155	69.3354	-1.18052	1.18052	-55.8808	0.441192	0	0.0204758	0.0107455	11	0.249639	Q9VIF2	Q9VIF2_DROME	CG9248, isoform A	CG9248	Q9VIF2	Drosophila melanogaster	tr		1	1	uniprot-drosophila_reviewed_unreviewed_0825_2016	>tr|Q9VIF2|Q9VIF2_DROME CG9248, isoform A OS=Drosophila melanogaster GN=CG9248 PE=1 SV=1	2	2
TRUE	Contr / Rep	Contr	Rep	42	Q7K3E2	852.337	1235.64	0.535764	0.535764	44.9709	1.44971	0	0.0206791	0.0108167	41	0.148655	Q7K3E2	Q7K3E2_DROME	CG5080, isoform A	CG5080	Q7K3E2	Drosophila melanogaster	tr		1	1	uniprot-drosophila_reviewed_unreviewed_0825_2016	>tr|Q7K3E2|Q7K3E2_DROME CG5080, isoform A OS=Drosophila melanogaster GN=CG5080 PE=1 SV=1	6	7
TRUE	Contr / Rep	Contr	Rep	6	Q9VK69	55.8382	34.5554	-0.692343	0.692343	-38.1152	0.618848	0	0.020748	0.010825	5	0.190362	Q9VK69	Q9VK69_DROME	T-complex protein 1 subunit delta	CG5525	Q9VK69	Drosophila melanogaster	tr		1	1	uniprot-drosophila_reviewed_unreviewed_0825_2016	>tr|Q9VK69|Q9VK69_DROME T-complex protein 1 subunit delta OS=Drosophila melanogaster GN=CG5525 PE=1 SV=1	1	1
TRUE	Contr / Rep	Contr	Rep	6	M9PG47;P13008;P62854	36.2322	25.5674	-0.502965	0.502965	-29.4345	0.705655	0	0.0211185	0.0109903	5	0.137872	M9PG47;P13008,P13008;P62854	M9PG47_DROME;RS26_DROME,RS26_DROME;RS26_HUMAN	Ribosomal protein S26, isoform D;40S ribosomal protein S26,40S ribosomal protein S26;40S ribosomal protein S26	RpS26;RpS26,RpS26;RPS26	M9PG47;P13008,P13008;P62854	Drosophila melanogaster;Drosophila melanogaster,Drosophila melanogaster;Homo sapiens	tr;sp,sp;sp		4;1,1;1	1;1,1;3	uniprot-drosophila_reviewed_unreviewed_0825_2016	>tr|M9PG47|M9PG47_DROME Ribosomal protein S26, isoform D OS=Drosophila melanogaster GN=RpS26 PE=4 SV=1;>sp|P13008|RS26_DROME 40S ribosomal protein S26 OS=Drosophila melanogaster GN=RpS26 PE=1 SV=1,>sp|P13008|RS26_DROME 40S ribosomal protein S26 OS=Drosophila melanogaster GN=RpS26 PE=1 SV=1;>sp|P62854|RS26_HUMAN 40S ribosomal protein S26 OS=Homo sapiens GN=RPS26 PE=1 SV=3	1	1
TRUE	Contr / Rep	Contr	Rep	7	Q6NP10;Q9VI04	390.158	515.76	0.402642	0.402642	32.1927	1.32193	0	0.022141	0.011493	6	0.152602	Q6NP10;Q9VI04	Q6NP10_DROME;Q9VI04_DROME	LD13390p (Fragment);Beta-alanine synthase	pyd3	Q6NP10;Q9VI04	Drosophila melanogaster	tr		2;1	1;2	uniprot-drosophila_reviewed_unreviewed_0825_2016	>tr|Q6NP10|Q6NP10_DROME LD13390p (Fragment) OS=Drosophila melanogaster GN=pyd3 PE=2 SV=1;>tr|Q9VI04|Q9VI04_DROME Beta-alanine synthase OS=Drosophila melanogaster GN=pyd3 PE=1 SV=2	2	2
TRUE	Contr / Rep	Contr	Rep	6	Q86PF4;Q9VG23	334.677	426.629	0.350213	0.350213	27.4748	1.27475	0	0.0228431	0.0118274	5	0.10069	Q86PF4;Q9VG23	Q86PF4_DROME;Q9VG23_DROME	GH08978p;GH22994p	CG10126-RB;CG10126	Q86PF4;Q9VG23	Drosophila melanogaster	tr		1	2	uniprot-drosophila_reviewed_unreviewed_0825_2016	>tr|Q86PF4|Q86PF4_DROME GH08978p OS=Drosophila melanogaster GN=CG10126-RB PE=1 SV=2;>tr|Q9VG23|Q9VG23_DROME GH22994p OS=Drosophila melanogaster GN=CG10126 PE=1 SV=2	1	1
TRUE	Contr / Rep	Contr	Rep	6	Q9U616	245.498	319.239	0.378928	0.378928	30.0375	1.30038	0	0.0233016	0.0120343	5	0.111636	Q9U616	GCSH_DROME	Glycine cleavage system H protein, mitochondrial,Glycine cleavage system H protein, mitochondrial	ppl	Q9U616	Drosophila melanogaster	sp		2	1	uniprot-drosophila_reviewed_unreviewed_0825_2016	>sp|Q9U616|GCSH_DROME Glycine cleavage system H protein, mitochondrial OS=Drosophila melanogaster GN=ppl PE=2 SV=1,>sp|Q9U616|GCSH_DROME Glycine cleavage system H protein, mitochondrial OS=Drosophila melanogaster GN=ppl PE=2 SV=1	2	2
TRUE	Contr / Rep	Contr	Rep	18	Q9VCK6	151.007	300.044	0.990561	0.990561	98.6957	1.98696	0	0.0234633	0.0120872	17	0.217932	Q9VCK6	Q9VCK6_DROME	LD34157p	CG10184	Q9VCK6	Drosophila melanogaster	tr		1	1	uniprot-drosophila_reviewed_unreviewed_0825_2016	>tr|Q9VCK6|Q9VCK6_DROME LD34157p OS=Drosophila melanogaster GN=CG10184 PE=1 SV=1	3	3
TRUE	Contr / Rep	Contr	Rep	12	A9UN79;B3DN36;Q9VBT7	69.1811	53.5885	-0.368454	0.368454	-22.5388	0.774612	0	0.0249469	0.0128191	11	0.165571	A9UN79;B3DN36;Q9VBT7	A9UN79_DROME;B3DN36_DROME;Q9VBT7_DROME	IP22107p (Fragment);IP21807p (Fragment);GH13495p	CG10513;CG10513-RB;CG10513	A9UN79;B3DN36;Q9VBT7	Drosophila melanogaster	tr		2;2;1	1;1;2	uniprot-drosophila_reviewed_unreviewed_0825_2016	>tr|A9UN79|A9UN79_DROME IP22107p (Fragment) OS=Drosophila melanogaster GN=CG10513 PE=2 SV=1;>tr|B3DN36|B3DN36_DROME IP21807p (Fragment) OS=Drosophila melanogaster GN=CG10513-RB PE=2 SV=1;>tr|Q9VBT7|Q9VBT7_DROME GH13495p OS=Drosophila melanogaster GN=CG10513 PE=1 SV=2	2	2
TRUE	Contr / Rep	Contr	Rep	6	A0A0B4KFZ9;P84040;P84041;P84042;P84043;P84044;Q76FD9;Q76FE7;Q76FF1;Q76FF5	211.915	133.255	-0.6693	0.6693	-37.1188	0.628812	0	0.0251545	0.0128933	5	0.192897	A0A0B4KFZ9;P84040,P84040;P84041;P84042;P84043;P84044;Q76FD9;Q76FE7;Q76FF1;Q76FF5	A0A0B4KFZ9_DROME;H4_DROME,H4_DROME;H4_DROER;H4_DROHY;H4_DROSI;H4_DROYA;H4_DROSE;H4_DROMA;H4_DROOR;H4_DROTE	Histone H4	His4r;His4,His4;His4;His4;His4;His4;His4;His4;His4;His4	A0A0B4KFZ9;P84040,P84040;P84041;P84042;P84043;P84044;Q76FD9;Q76FE7;Q76FF1;Q76FF5	Drosophila melanogaster;Drosophila melanogaster,Drosophila melanogaster;Drosophila erecta;Drosophila hydei;Drosophila simulans;Drosophila yakuba;Drosophila sechellia;Drosophila mauritiana;Drosophila orena;Drosophila teissieri	tr;sp,sp;sp;sp;sp;sp;sp;sp;sp;sp		3;1,1;3;3;3;3;3;3;3;3	1;2,2;2;2;2;2;3;3;3;3	uniprot-drosophila_reviewed_unreviewed_0825_2016	>tr|A0A0B4KFZ9|A0A0B4KFZ9_DROME Histone H4 OS=Drosophila melanogaster GN=His4r PE=3 SV=1;>sp|P84040|H4_DROME Histone H4 OS=Drosophila melanogaster GN=His4 PE=1 SV=2,>sp|P84040|H4_DROME Histone H4 OS=Drosophila melanogaster GN=His4 PE=1 SV=2;>sp|P84041|H4_DROER Histone H4 OS=Drosophila erecta GN=His4 PE=3 SV=2;>sp|P84042|H4_DROHY Histone H4 OS=Drosophila hydei GN=His4 PE=3 SV=2;>sp|P84043|H4_DROSI…	1	1
TRUE	Contr / Rep	Contr	Rep	12	B8A3X3;O18335;Q8IGH2	1367.46	952.185	-0.522188	0.522188	-30.3685	0.696315	0	0.02543	0.0130018	11	0.133012	B8A3X3;O18335;Q8IGH2	B8A3X3_DROME;O18335_DROME;Q8IGH2_DROME	FI09227p;Drab11;RH21315p	Rab11-RB;Rab11;Rab11	B8A3X3;O18335;Q8IGH2	Drosophila melanogaster	tr		2;1;2	1	uniprot-drosophila_reviewed_unreviewed_0825_2016	>tr|B8A3X3|B8A3X3_DROME FI09227p OS=Drosophila melanogaster GN=Rab11-RB PE=2 SV=1;>tr|O18335|O18335_DROME Drab11 OS=Drosophila melanogaster GN=Rab11 PE=1 SV=1;>tr|Q8IGH2|Q8IGH2_DROME RH21315p OS=Drosophila melanogaster GN=Rab11 PE=2 SV=1	2	2
TRUE	Contr / Rep	Contr	Rep	6	A0A023GRW4;E1JJC0;M9NDL5;M9NDM1;M9NE61;M9NES6;M9NET2;M9NFR6;M9NFS1;M9NGK3;M9NGL3;Q8IRV7;Q8IRV8;Q8IRV9;Q9NEF8;Q9W4Y3;Q9W4Y4;X2JAC7;X2JCE8;X2JDK9;X2JE09	6.27367	2.8935	-1.11649	1.11649	-53.8787	0.461213	0	0.0255403	0.0130255	5	0.369353	A0A023GRW4;E1JJC0;M9NDL5;M9NDM1;M9NE61;M9NES6;M9NET2;M9NFR6;M9NFS1;M9NGK3;M9NGL3;Q8IRV7;Q8IRV8;Q8IRV9;Q9NEF8;Q9W4Y3;Q9W4Y4;X2JAC7;X2JCE8;X2JDK9;X2JE09	A0A023GRW4_DROME;E1JJC0_DROME;M9NDL5_DROME;M9NDM1_DROME;M9NE61_DROME;M9NES6_DROME;M9NET2_DROME;M9NFR6_DROME;M9NFS1_DROME;M9NGK3_DROME;M9NGL3_DROME;Q8IRV7_DROME;Q8IRV8_DROME;Q8IRV9_DROME;Q9NEF8_DROME;Q9W4Y3_DROME;Q9W4Y4_DROME;X2JAC7_DROME;X2JCE8_DROME;X2JDK9_DROME;X2JE09_DROME	Terribly reduced optic lobes, isoform AZ;Terribly reduced optic lobes, isoform AH;Terribly reduced optic lobes, isoform AF;Terribly reduced optic lobes, isoform AP;Terribly reduced optic lobes, isoform AR;Terribly reduced optic lobes, isoform AU;Terribly reduced optic lobes, isoform AI;Terribly reduced optic lobes, isoform AY;Terribly reduced optic lobes, isoform AQ;Terribly reduced optic lobes, …	trol	A0A023GRW4;E1JJC0;M9NDL5;M9NDM1;M9NE61;M9NES6;M9NET2;M9NFR6;M9NFS1;M9NGK3;M9NGL3;Q8IRV7;Q8IRV8;Q8IRV9;Q9NEF8;Q9W4Y3;Q9W4Y4;X2JAC7;X2JCE8;X2JDK9;X2JE09	Drosophila melanogaster	tr		1;1;1;1;1;1;1;1;1;1;1;1;1;1;4;1;1;1;1;1;1	1;3;2;2;2;2;2;2;2;2;2;3;3;3;1;4;5;1;1;1;1	uniprot-drosophila_reviewed_unreviewed_0825_2016	>tr|A0A023GRW4|A0A023GRW4_DROME Terribly reduced optic lobes, isoform AZ OS=Drosophila melanogaster GN=trol PE=1 SV=1;>tr|E1JJC0|E1JJC0_DROME Terribly reduced optic lobes, isoform AH OS=Drosophila melanogaster GN=trol PE=1 SV=3;>tr|M9NDL5|M9NDL5_DROME Terribly reduced optic lobes, isoform AF OS=Drosophila melanogaster GN=trol PE=1 SV=2;>tr|M9NDM1|M9NDM1_DROME Terribly reduced optic lobes, isoform…	1	1
TRUE	Contr / Rep	Contr	Rep	12	Q5U137;Q7K537;Q9VFZ4	94.2095	236.595	1.32847	1.32847	151.137	2.51137	0	0.0260297	0.013242	11	0.285221	Q5U137;Q7K537;Q9VFZ4	Q5U137_DROME;Q7K537_DROME;Q9VFZ4_DROME	LP16180p (Fragment);GH14316p;CG7966	;CG7966;CG7966	Q5U137;Q7K537;Q9VFZ4	Drosophila melanogaster	tr		2;2;1	1;1;2	uniprot-drosophila_reviewed_unreviewed_0825_2016	>tr|Q5U137|Q5U137_DROME LP16180p (Fragment) OS=Drosophila melanogaster PE=2 SV=1;>tr|Q7K537|Q7K537_DROME GH14316p OS=Drosophila melanogaster GN=CG7966 PE=2 SV=1;>tr|Q9VFZ4|Q9VFZ4_DROME CG7966 OS=Drosophila melanogaster GN=CG7966 PE=1 SV=2	2	2
TRUE	Contr / Rep	Contr	Rep	6	Q9VK60	2058.23	3536.99	0.781118	0.781118	71.8462	1.71846	0	0.0275251	0.013968	5	0.290631	Q9VK60	Q9VK60_DROME	CG6180	CG6180	Q9VK60	Drosophila melanogaster	tr		1	2	uniprot-drosophila_reviewed_unreviewed_0825_2016	>tr|Q9VK60|Q9VK60_DROME CG6180 OS=Drosophila melanogaster GN=CG6180 PE=1 SV=2	1	1
TRUE	Contr / Rep	Contr	Rep	6	Q9VXZ8	15.9813	27.4684	0.781389	0.781389	71.8785	1.71878	0	0.0278394	0.0140924	5	0.236562	Q9VXZ8	Q9VXZ8_DROME	BcDNA.GH02901	pdgy	Q9VXZ8	Drosophila melanogaster	tr		1	2	uniprot-drosophila_reviewed_unreviewed_0825_2016	>tr|Q9VXZ8|Q9VXZ8_DROME BcDNA.GH02901 OS=Drosophila melanogaster GN=pdgy PE=1 SV=2	1	1
TRUE	Contr / Rep	Contr	Rep	12	A0A0B4KGG5;Q8T3L2;Q9VDY8	78.9819	55.7615	-0.502253	0.502253	-29.3997	0.706003	0	0.0285684	0.0144256	11	0.499558	A0A0B4KGG5;Q8T3L2;Q9VDY8	A0A0B4KGG5_DROME;Q8T3L2_DROME;Q9VDY8_DROME	Vibrator, isoform B;SD01527p;MIP08680p	vib	A0A0B4KGG5;Q8T3L2;Q9VDY8	Drosophila melanogaster	tr		1;2;1	1	uniprot-drosophila_reviewed_unreviewed_0825_2016	>tr|A0A0B4KGG5|A0A0B4KGG5_DROME Vibrator, isoform B OS=Drosophila melanogaster GN=vib PE=1 SV=1;>tr|Q8T3L2|Q8T3L2_DROME SD01527p OS=Drosophila melanogaster GN=vib PE=2 SV=1;>tr|Q9VDY8|Q9VDY8_DROME MIP08680p OS=Drosophila melanogaster GN=vib PE=1 SV=1	2	2
TRUE	Contr / Rep	Contr	Rep	6	Q9VEP8	12.111	24.2025	0.998837	0.998837	99.8389	1.99839	0	0.0287212	0.014467	5	0.30077	Q9VEP8	Q9VEP8_DROME	GH11385p	Irc	Q9VEP8	Drosophila melanogaster	tr		1	2	uniprot-drosophila_reviewed_unreviewed_0825_2016	>tr|Q9VEP8|Q9VEP8_DROME GH11385p OS=Drosophila melanogaster GN=Irc PE=1 SV=2	1	1
TRUE	Contr / Rep	Contr	Rep	6	Q9W4J4	15.8268	23.9428	0.597221	0.597221	51.28	1.5128	0	0.0297338	0.0149401	5	0.187513	Q9W4J4	Q9W4J4_DROME	GM14292p	CG11444	Q9W4J4	Drosophila melanogaster	tr		1	1	uniprot-drosophila_reviewed_unreviewed_0825_2016	>tr|Q9W4J4|Q9W4J4_DROME GM14292p OS=Drosophila melanogaster GN=CG11444 PE=1 SV=1	1	1
TRUE	Contr / Rep	Contr	Rep	18	Q7KUC2;Q8IGX3	3119.53	3073.85	-0.0212811	0.0212811	-1.46427	0.985357	0	0.0306226	0.0153489	17	0.320533	Q7KUC2;Q8IGX3	Q7KUC2_DROME;Q8IGX3_DROME	FI04467p;RE10625p	Pdxk;CG4446	Q7KUC2;Q8IGX3	Drosophila melanogaster	tr		1;2	1	uniprot-drosophila_reviewed_unreviewed_0825_2016	>tr|Q7KUC2|Q7KUC2_DROME FI04467p OS=Drosophila melanogaster GN=Pdxk PE=1 SV=1;>tr|Q8IGX3|Q8IGX3_DROME RE10625p OS=Drosophila melanogaster GN=CG4446 PE=2 SV=1	4	6
TRUE	Contr / Rep	Contr	Rep	24	H5V8B8;M9MQH9;M9NDI6;P36179	108.234	79.4013	-0.446919	0.446919	-26.6392	0.733608	0	0.0307591	0.0153796	23	0.238556	H5V8B8;M9MQH9;M9NDI6;P36179,P36179	H5V8B8_DROME;M9MQH9_DROME;M9NDI6_DROME;2AAA_DROME,2AAA_DROME	MIP33436p1;Protein phosphatase 2A at 29B, isoform C;Protein phosphatase 2A at 29B, isoform D;Serine/threonine-protein phosphatase PP2A 65 kDa regulatory subunit,Serine/threonine-protein phosphatase PP2A 65 kDa regulatory subunit	Pp2A-29B	H5V8B8;M9MQH9;M9NDI6;P36179,P36179	Drosophila melanogaster	tr;tr;tr;sp,sp		1;1;1;2,2	1;1;1;4,4	uniprot-drosophila_reviewed_unreviewed_0825_2016	>tr|H5V8B8|H5V8B8_DROME MIP33436p1 OS=Drosophila melanogaster GN=Pp2A-29B PE=1 SV=1;>tr|M9MQH9|M9MQH9_DROME Protein phosphatase 2A at 29B, isoform C OS=Drosophila melanogaster GN=Pp2A-29B PE=1 SV=1;>tr|M9NDI6|M9NDI6_DROME Protein phosphatase 2A at 29B, isoform D OS=Drosophila melanogaster GN=Pp2A-29B PE=1 SV=1;>sp|P36179|2AAA_DROME Serine/threonine-protein phosphatase PP2A 65 kDa regulatory subun…	4	4
TRUE	Contr / Rep	Contr	Rep	108	C6TP50;Q9W401	216595	183321	-0.240629	0.240629	-15.3624	0.846376	0	0.0313041	0.0154448	107	0.0620823	C6TP50;Q9W401,Q9W401	C6TP50_DROME;CISY_DROME,CISY_DROME	Citrate synthase (Fragment);Probable citrate synthase, mitochondrial,Probable citrate synthase, mitochondrial	kdn-RA;kdn,kdn	C6TP50;Q9W401,Q9W401	Drosophila melanogaster	tr;sp,sp		2	1	uniprot-drosophila_reviewed_unreviewed_0825_2016	>tr|C6TP50|C6TP50_DROME Citrate synthase (Fragment) OS=Drosophila melanogaster GN=kdn-RA PE=2 SV=1;>sp|Q9W401|CISY_DROME Probable citrate synthase, mitochondrial OS=Drosophila melanogaster GN=kdn PE=2 SV=1,>sp|Q9W401|CISY_DROME Probable citrate synthase, mitochondrial OS=Drosophila melanogaster GN=kdn PE=2 SV=1	13	18
TRUE	Contr / Rep	Contr	Rep	42	Q7KV27;Q8T9D5;Q9VYD9	9767.15	11724.4	0.2635	0.2635	20.0387	1.20039	0	0.0314762	0.0154448	41	0.0722608	Q7KV27;Q8T9D5;Q9VYD9	Q7KV27_DROME;Q8T9D5_DROME;Q9VYD9_DROME	CG1640, isoform A;SD05601p;AT04676p	CG1640	Q7KV27;Q8T9D5;Q9VYD9	Drosophila melanogaster	tr		1;2;1	1;1;3	uniprot-drosophila_reviewed_unreviewed_0825_2016	>tr|Q7KV27|Q7KV27_DROME CG1640, isoform A OS=Drosophila melanogaster GN=CG1640 PE=1 SV=1;>tr|Q8T9D5|Q8T9D5_DROME SD05601p OS=Drosophila melanogaster GN=CG1640 PE=2 SV=1;>tr|Q9VYD9|Q9VYD9_DROME AT04676p OS=Drosophila melanogaster GN=CG1640 PE=1 SV=3	6	7
TRUE	Contr / Rep	Contr	Rep	6	C6SUZ3;Q7KSB5;Q9VDP9	377.251	453.412	0.265298	0.265298	20.1884	1.20188	0	0.0314952	0.0154448	5	0.0859798	C6SUZ3;Q7KSB5;Q9VDP9	C6SUZ3_DROME;Q7KSB5_DROME;Q9VDP9_DROME	S-formylglutathione hydrolase (Fragment);S-formylglutathione hydrolase;S-formylglutathione hydrolase	CG4390-RB;CG4390;CG4390	C6SUZ3;Q7KSB5;Q9VDP9	Drosophila melanogaster	tr		2;1;1	1	uniprot-drosophila_reviewed_unreviewed_0825_2016	>tr|C6SUZ3|C6SUZ3_DROME S-formylglutathione hydrolase (Fragment) OS=Drosophila melanogaster GN=CG4390-RB PE=2 SV=1;>tr|Q7KSB5|Q7KSB5_DROME S-formylglutathione hydrolase OS=Drosophila melanogaster GN=CG4390 PE=1 SV=1;>tr|Q9VDP9|Q9VDP9_DROME S-formylglutathione hydrolase OS=Drosophila melanogaster GN=CG4390 PE=1 SV=1	1	1
TRUE	Contr / Rep	Contr	Rep	12	M9PHI2;Q8IQX8;Q9VWT1	364.261	304.363	-0.259182	0.259182	-16.4438	0.835562	0	0.0310843	0.0154448	11	0.0989056	M9PHI2;Q8IQX8;Q9VWT1	M9PHI2_DROME;Q8IQX8_DROME;Q9VWT1_DROME	Histidyl-tRNA synthetase, isoform C;Histidyl-tRNA synthetase, isoform D;GH22474p	HisRS	M9PHI2;Q8IQX8;Q9VWT1	Drosophila melanogaster	tr		1	1;2;1	uniprot-drosophila_reviewed_unreviewed_0825_2016	>tr|M9PHI2|M9PHI2_DROME Histidyl-tRNA synthetase, isoform C OS=Drosophila melanogaster GN=HisRS PE=1 SV=1;>tr|Q8IQX8|Q8IQX8_DROME Histidyl-tRNA synthetase, isoform D OS=Drosophila melanogaster GN=HisRS PE=1 SV=2;>tr|Q9VWT1|Q9VWT1_DROME GH22474p OS=Drosophila melanogaster GN=HisRS PE=1 SV=1	4	4
TRUE	Contr / Rep	Contr	Rep	18	A1Z9E3	435.77	296.963	-0.553286	0.553286	-31.8534	0.681466	0	0.0312401	0.0154448	17	0.293279	A1Z9E3	A1Z9E3_DROME	Elongation factor Tu	EfTuM	A1Z9E3	Drosophila melanogaster	tr		1	1	uniprot-drosophila_reviewed_unreviewed_0825_2016	>tr|A1Z9E3|A1Z9E3_DROME Elongation factor Tu OS=Drosophila melanogaster GN=EfTuM PE=1 SV=1	3	3
TRUE	Contr / Rep	Contr	Rep	30	A1Z784;A8DY67;Q7JV23	1456.86	1550.62	0.0899882	0.0899882	6.43615	1.06436	0	0.0311647	0.0154448	29	0.204832	A1Z784;A8DY67;Q7JV23	A1Z784_DROME;A8DY67_DROME;Q7JV23_DROME	Acetyl-CoA carboxylase, isoform A;Acetyl-CoA carboxylase, isoform E;Acetyl-CoA carboxylase, isoform B	ACC	A1Z784;A8DY67;Q7JV23	Drosophila melanogaster	tr		1	1;2;1	uniprot-drosophila_reviewed_unreviewed_0825_2016	>tr|A1Z784|A1Z784_DROME Acetyl-CoA carboxylase, isoform A OS=Drosophila melanogaster GN=ACC PE=1 SV=1;>tr|A8DY67|A8DY67_DROME Acetyl-CoA carboxylase, isoform E OS=Drosophila melanogaster GN=ACC PE=1 SV=2;>tr|Q7JV23|Q7JV23_DROME Acetyl-CoA carboxylase, isoform B OS=Drosophila melanogaster GN=ACC PE=1 SV=1	7	7
TRUE	Contr / Rep	Contr	Rep	18	B5RJT1;C7LAE2;D3PFE8;Q86P55;Q8IGR1;Q8INH5;Q8INH6;Q9VFW7	123.008	126.94	0.045403	0.045403	3.19714	1.03197	0	0.03119	0.0154448	17	0.275989	B5RJT1;C7LAE2;D3PFE8;Q86P55;Q8IGR1;Q8INH5;Q8INH6;Q9VFW7	B5RJT1_DROME;C7LAE2_DROME;D3PFE8_DROME;Q86P55_DROME;Q8IGR1_DROME;Q8INH5_DROME;Q8INH6_DROME;Q9VFW7_DROME	FI04417p (Fragment);LP20836p;AT05101p (Fragment);RE62048p (Fragment);RE44147p (Fragment);RE43108p;FI18373p1;Uncharacterized protein, isoform A	CG32473-RA;CG32473-RC;CG32473-RB;CG8775;CG8775;CG32473-RB;CG32473-RC;CG32473	B5RJT1;C7LAE2;D3PFE8;Q86P55;Q8IGR1;Q8INH5;Q8INH6;Q9VFW7	Drosophila melanogaster	tr		2;2;2;2;2;1;1;1	1;1;1;1;1;1;1;2	uniprot-drosophila_reviewed_unreviewed_0825_2016	>tr|B5RJT1|B5RJT1_DROME FI04417p (Fragment) OS=Drosophila melanogaster GN=CG32473-RA PE=2 SV=1;>tr|C7LAE2|C7LAE2_DROME LP20836p OS=Drosophila melanogaster GN=CG32473-RC PE=2 SV=1;>tr|D3PFE8|D3PFE8_DROME AT05101p (Fragment) OS=Drosophila melanogaster GN=CG32473-RB PE=2 SV=1;>tr|Q86P55|Q86P55_DROME RE62048p (Fragment) OS=Drosophila melanogaster GN=CG8775 PE=2 SV=1;>tr|Q8IGR1|Q8IGR1_DROME RE44147p (…	3	3
TRUE	Contr / Rep	Contr	Rep	6	Q9Y143	35.1991	56.8063	0.690514	0.690514	61.3858	1.61386	0	0.0313945	0.0154448	5	0.254919	Q9Y143	Q9Y143_DROME	BcDNA.GH05536	CG5867-RA	Q9Y143	Drosophila melanogaster	tr		1	1	uniprot-drosophila_reviewed_unreviewed_0825_2016	>tr|Q9Y143|Q9Y143_DROME BcDNA.GH05536 OS=Drosophila melanogaster GN=CG5867-RA PE=1 SV=1	1	1
TRUE	Contr / Rep	Contr	Rep	12	M9PBH7;M9PBU2;P40792;P48554	248.121	111.893	-1.14892	1.14892	-54.9037	0.450963	0	0.0317183	0.0155169	11	0.479823	M9PBH7;M9PBU2;P40792,P40792;P48554,P48554	M9PBH7_DROME;M9PBU2_DROME;RAC1_DROME,RAC1_DROME;RAC2_DROME,RAC2_DROME	Rac1, isoform B;Rac2, isoform B;Ras-related protein Rac1,Ras-related protein Rac1;Ras-related protein Rac2,Ras-related protein Rac2	Rac1;Rac2;Rac1,Rac1;Rac2,Rac2	M9PBH7;M9PBU2;P40792,P40792;P48554,P48554	Drosophila melanogaster	tr;tr;sp,sp;sp,sp		4;4;1,1;1,1	1;1;2,2;1,1	uniprot-drosophila_reviewed_unreviewed_0825_2016	>tr|M9PBH7|M9PBH7_DROME Rac1, isoform B OS=Drosophila melanogaster GN=Rac1 PE=4 SV=1;>tr|M9PBU2|M9PBU2_DROME Rac2, isoform B OS=Drosophila melanogaster GN=Rac2 PE=4 SV=1;>sp|P40792|RAC1_DROME Ras-related protein Rac1 OS=Drosophila melanogaster GN=Rac1 PE=1 SV=2,>sp|P40792|RAC1_DROME Ras-related protein Rac1 OS=Drosophila melanogaster GN=Rac1 PE=1 SV=2;>sp|P48554|RAC2_DROME Ras-related protein Rac…	2	2
TRUE	Contr / Rep	Contr	Rep	18	Q9VFV9	378.966	285.572	-0.408214	0.408214	-24.6444	0.753556	0	0.0318946	0.0155658	17	0.163381	Q9VFV9	Q9VFV9_DROME	DnaJ-like-2, isoform A	Droj2	Q9VFV9	Drosophila melanogaster	tr		1	1	uniprot-drosophila_reviewed_unreviewed_0825_2016	>tr|Q9VFV9|Q9VFV9_DROME DnaJ-like-2, isoform A OS=Drosophila melanogaster GN=Droj2 PE=1 SV=1	2	3
TRUE	Contr / Rep	Contr	Rep	13	F2FB73;Q9VB64	434.443	329.685	-0.398079	0.398079	-24.1132	0.758868	0	0.0332684	0.0161975	12	0.218624	F2FB73;Q9VB64	F2FB73_DROME;Q9VB64_DROME	RH24252p (Fragment);Uncharacterized protein, isoform A	CG42813-RA;CG42813	F2FB73;Q9VB64	Drosophila melanogaster	tr		2;1	1;3	uniprot-drosophila_reviewed_unreviewed_0825_2016	>tr|F2FB73|F2FB73_DROME RH24252p (Fragment) OS=Drosophila melanogaster GN=CG42813-RA PE=2 SV=1;>tr|Q9VB64|Q9VB64_DROME Uncharacterized protein, isoform A OS=Drosophila melanogaster GN=CG42813 PE=1 SV=3	3	3
TRUE	Contr / Rep	Contr	Rep	31	Q8IGE9;Q9VN21	708.586	606.117	-0.225345	0.225345	-14.461	0.85539	0	0.0336588	0.0163485	30	0.21762	Q8IGE9;Q9VN21	Q8IGE9_DROME;Q9VN21_DROME	RH35990p (Fragment);LD30155p	lost	Q8IGE9;Q9VN21	Drosophila melanogaster	tr		2;1	1	uniprot-drosophila_reviewed_unreviewed_0825_2016	>tr|Q8IGE9|Q8IGE9_DROME RH35990p (Fragment) OS=Drosophila melanogaster GN=lost PE=2 SV=1;>tr|Q9VN21|Q9VN21_DROME LD30155p OS=Drosophila melanogaster GN=lost PE=1 SV=1	5	6
TRUE	Contr / Rep	Contr	Rep	12	A0A0B4LFW3;A9QHS4;A9QHS6;A9QHW8;C0PV28;Q7K088	106.62	63.7122	-0.742829	0.742829	-40.2434	0.597566	0	0.0339656	0.0164584	11	0.204468	A0A0B4LFW3;A9QHS4;A9QHS6;A9QHW8;C0PV28;Q7K088	A0A0B4LFW3_DROME;A9QHS4_DROME;A9QHS6_DROME;A9QHW8_DROME;C0PV28_DROME;Q7K088_DROME	Odorant-binding protein 56e, isoform B;Odorant-binding protein 56e;Odorant-binding protein 56e;Odorant-binding protein 56e;MIP07173p (Fragment);Odorant-binding protein 56e	Obp56e;Obp56e;Obp56e;Obp56e;Obp56e-RA;Obp56e	A0A0B4LFW3;A9QHS4;A9QHS6;A9QHW8;C0PV28;Q7K088	Drosophila melanogaster	tr		1;4;4;4;2;1	1	uniprot-drosophila_reviewed_unreviewed_0825_2016	>tr|A0A0B4LFW3|A0A0B4LFW3_DROME Odorant-binding protein 56e, isoform B OS=Drosophila melanogaster GN=Obp56e PE=1 SV=1;>tr|A9QHS4|A9QHS4_DROME Odorant-binding protein 56e OS=Drosophila melanogaster GN=Obp56e PE=4 SV=1;>tr|A9QHS6|A9QHS6_DROME Odorant-binding protein 56e OS=Drosophila melanogaster GN=Obp56e PE=4 SV=1;>tr|A9QHW8|A9QHW8_DROME Odorant-binding protein 56e OS=Drosophila melanogaster GN=O…	2	2
TRUE	Contr / Rep	Contr	Rep	12	A1Z6X6	1177.96	1099.18	-0.0998555	0.0998555	-6.68736	0.933126	0	0.0345958	0.0167241	11	0.0873977	A1Z6X6	A1Z6X6_DROME	Glyoxalase 1	Glo1	A1Z6X6	Drosophila melanogaster	tr		1	1	uniprot-drosophila_reviewed_unreviewed_0825_2016	>tr|A1Z6X6|A1Z6X6_DROME Glyoxalase 1 OS=Drosophila melanogaster GN=Glo1 PE=1 SV=1	2	2
TRUE	Contr / Rep	Contr	Rep	6	H8F4T6;Q9V6U9	141.751	271.905	0.939747	0.939747	91.8191	1.91819	0	0.0348259	0.0167955	5	0.405643	H8F4T6;Q9V6U9,Q9V6U9	H8F4T6_DROME;MECR_DROME,MECR_DROME	FI19911p1;Probable trans-2-enoyl-CoA reductase, mitochondrial,Probable trans-2-enoyl-CoA reductase, mitochondrial	CG16935-RA;CG16935,CG16935	H8F4T6;Q9V6U9,Q9V6U9	Drosophila melanogaster	tr;sp,sp		1;3,3	1;2,2	uniprot-drosophila_reviewed_unreviewed_0825_2016	>tr|H8F4T6|H8F4T6_DROME FI19911p1 OS=Drosophila melanogaster GN=CG16935-RA PE=1 SV=1;>sp|Q9V6U9|MECR_DROME Probable trans-2-enoyl-CoA reductase, mitochondrial OS=Drosophila melanogaster GN=CG16935 PE=3 SV=2,>sp|Q9V6U9|MECR_DROME Probable trans-2-enoyl-CoA reductase, mitochondrial OS=Drosophila melanogaster GN=CG16935 PE=3 SV=2	1	1
TRUE	Contr / Rep	Contr	Rep	124	E1JHR5;P15007	335389	272975	-0.297065	0.297065	-18.6094	0.813906	0	0.0350602	0.0168686	123	0.0827807	E1JHR5;P15007,P15007	E1JHR5_DROME;ENO_DROME,ENO_DROME	Enolase, isoform F;Enolase,Enolase	Eno	E1JHR5;P15007,P15007	Drosophila melanogaster	tr;sp,sp		1	1;2,2	uniprot-drosophila_reviewed_unreviewed_0825_2016	>tr|E1JHR5|E1JHR5_DROME Enolase, isoform F OS=Drosophila melanogaster GN=Eno PE=1 SV=1;>sp|P15007|ENO_DROME Enolase OS=Drosophila melanogaster GN=Eno PE=1 SV=2,>sp|P15007|ENO_DROME Enolase OS=Drosophila melanogaster GN=Eno PE=1 SV=2	20	23
TRUE	Contr / Rep	Contr	Rep	6	M9NEV7;Q8ST39;Q9VII1	66.5433	46.9613	-0.502822	0.502822	-29.4275	0.705725	0	0.0353112	0.0169494	5	0.189905	M9NEV7;Q8ST39;Q9VII1	M9NEV7_DROME;Q8ST39_DROME;Q9VII1_DROME	CG9336, isoform B;RE67340p;CG9336, isoform A	CG9336;CG9336;CG9336-RA	M9NEV7;Q8ST39;Q9VII1	Drosophila melanogaster	tr		1;2;1	1	uniprot-drosophila_reviewed_unreviewed_0825_2016	>tr|M9NEV7|M9NEV7_DROME CG9336, isoform B OS=Drosophila melanogaster GN=CG9336 PE=1 SV=1;>tr|Q8ST39|Q8ST39_DROME RE67340p OS=Drosophila melanogaster GN=CG9336 PE=2 SV=1;>tr|Q9VII1|Q9VII1_DROME CG9336, isoform A OS=Drosophila melanogaster GN=CG9336-RA PE=1 SV=1	1	1
TRUE	Contr / Rep	Contr	Rep	130	M9PCE0;Q01604	99392.1	84952.4	-0.226477	0.226477	-14.528	0.85472	0	0.0355697	0.0170334	129	0.125324	M9PCE0;Q01604,Q01604	M9PCE0_DROME;PGK_DROME,PGK_DROME	Phosphoglycerate kinase	Pgk	M9PCE0;Q01604,Q01604	Drosophila melanogaster	tr;sp,sp		3;2,2	1;2,2	uniprot-drosophila_reviewed_unreviewed_0825_2016	>tr|M9PCE0|M9PCE0_DROME Phosphoglycerate kinase OS=Drosophila melanogaster GN=Pgk PE=3 SV=1;>sp|Q01604|PGK_DROME Phosphoglycerate kinase OS=Drosophila melanogaster GN=Pgk PE=2 SV=2,>sp|Q01604|PGK_DROME Phosphoglycerate kinase OS=Drosophila melanogaster GN=Pgk PE=2 SV=2	17	22
TRUE	Contr / Rep	Contr	Rep	6	M9MRF2;Q9VMU4	170.248	109.501	-0.636696	0.636696	-35.6816	0.643184	0	0.0358605	0.0170526	5	0.225093	M9MRF2;Q9VMU4,Q9VMU4	M9MRF2_DROME;RL37A_DROME,RL37A_DROME	Ribosomal protein L37A, isoform C;60S ribosomal protein L37a,60S ribosomal protein L37a	RpL37A	M9MRF2;Q9VMU4,Q9VMU4	Drosophila melanogaster	tr;sp,sp		3;1,1	1;3,3	uniprot-drosophila_reviewed_unreviewed_0825_2016	>tr|M9MRF2|M9MRF2_DROME Ribosomal protein L37A, isoform C OS=Drosophila melanogaster GN=RpL37A PE=3 SV=1;>sp|Q9VMU4|RL37A_DROME 60S ribosomal protein L37a OS=Drosophila melanogaster GN=RpL37A PE=1 SV=3,>sp|Q9VMU4|RL37A_DROME 60S ribosomal protein L37a OS=Drosophila melanogaster GN=RpL37A PE=1 SV=3	1	1
TRUE	Contr / Rep	Contr	Rep	12	D0IQK3;M9MS55;Q76NR0;Q961Q7;Q9VY76;X2JEY5;X2JFA0	195.018	87.9702	-1.14852	1.14852	-54.8913	0.451087	0	0.0357885	0.0170526	11	0.338444	D0IQK3;M9MS55;Q76NR0;Q961Q7;Q9VY76;X2JEY5;X2JFA0	D0IQK3_DROME;M9MS55_DROME;Q76NR0_DROME;Q961Q7_DROME;Q9VY76_DROME;X2JEY5_DROME;X2JFA0_DROME	AMP deaminase, isoform J;AMP deaminase, isoform H;AMP deaminase, isoform G;AMP deaminase, isoform C;AMP deaminase, isoform E;AMP deaminase, isoform K;AMP deaminase, isoform L	AMPdeam	D0IQK3;M9MS55;Q76NR0;Q961Q7;Q9VY76;X2JEY5;X2JFA0	Drosophila melanogaster	tr		1	2;1;2;1;4;1;1	uniprot-drosophila_reviewed_unreviewed_0825_2016	>tr|D0IQK3|D0IQK3_DROME AMP deaminase, isoform J OS=Drosophila melanogaster GN=AMPdeam PE=1 SV=2;>tr|M9MS55|M9MS55_DROME AMP deaminase, isoform H OS=Drosophila melanogaster GN=AMPdeam PE=1 SV=1;>tr|Q76NR0|Q76NR0_DROME AMP deaminase, isoform G OS=Drosophila melanogaster GN=AMPdeam PE=1 SV=2;>tr|Q961Q7|Q961Q7_DROME AMP deaminase, isoform C OS=Drosophila melanogaster GN=AMPdeam PE=1 SV=1;>tr|Q9VY76|…	2	2
TRUE	Contr / Rep	Contr	Rep	6	O77266;Q7K7B5;Q960D4	85.3941	73.9822	-0.206958	0.206958	-13.3638	0.866362	0	0.035739	0.0170526	5	0.0729181	O77266;Q7K7B5;Q960D4	O77266_DROME;Q7K7B5_DROME;Q960D4_DROME	CG4199, isoform A;EG:22E5.5 protein;CG4199, isoform B	CG4199;EG:22E5.5;EG:22E5.5	O77266;Q7K7B5;Q960D4	Drosophila melanogaster	tr		1;4;1	3;1;1	uniprot-drosophila_reviewed_unreviewed_0825_2016	>tr|O77266|O77266_DROME CG4199, isoform A OS=Drosophila melanogaster GN=CG4199 PE=1 SV=3;>tr|Q7K7B5|Q7K7B5_DROME EG:22E5.5 protein OS=Drosophila melanogaster GN=EG:22E5.5 PE=4 SV=1;>tr|Q960D4|Q960D4_DROME CG4199, isoform B OS=Drosophila melanogaster GN=EG:22E5.5 PE=1 SV=1	3	3
TRUE	Contr / Rep	Contr	Rep	6	Q94521	457.468	601.443	0.394757	0.394757	31.4721	1.31472	0	0.036003	0.0170805	5	0.136942	Q94521	DNAT_DROME	Dopamine N-acetyltransferase	Dat	Q94521	Drosophila melanogaster	sp		1	1	uniprot-drosophila_reviewed_unreviewed_0825_2016	>sp|Q94521|DNAT_DROME Dopamine N-acetyltransferase OS=Drosophila melanogaster GN=Dat PE=1 SV=1,>sp|Q94521|DNAT_DROME Dopamine N-acetyltransferase OS=Drosophila melanogaster GN=Dat PE=1 SV=1	1	1
TRUE	Contr / Rep	Contr	Rep	60	L0MQ04;Q05825;X2JH42	23409.7	18159.2	-0.366402	0.366402	-22.4286	0.775714	0	0.0361439	0.0171075	59	0.0774229	L0MQ04;Q05825,Q05825;X2JH42	L0MQ04_DROME;ATPB_DROME,ATPB_DROME;X2JH42_DROME	ATP synthase subunit beta;ATP synthase subunit beta, mitochondrial,ATP synthase subunit beta, mitochondrial;ATP synthase subunit beta	ATPsynbeta	L0MQ04;Q05825,Q05825;X2JH42	Drosophila melanogaster	tr;sp,sp;tr		1	1;3,3;1	uniprot-drosophila_reviewed_unreviewed_0825_2016	>tr|L0MQ04|L0MQ04_DROME ATP synthase subunit beta OS=Drosophila melanogaster GN=ATPsynbeta PE=1 SV=1;>sp|Q05825|ATPB_DROME ATP synthase subunit beta, mitochondrial OS=Drosophila melanogaster GN=ATPsynbeta PE=1 SV=3,>sp|Q05825|ATPB_DROME ATP synthase subunit beta, mitochondrial OS=Drosophila melanogaster GN=ATPsynbeta PE=1 SV=3;>tr|X2JH42|X2JH42_DROME ATP synthase subunit beta OS=Drosophila melano…	10	10
TRUE	Contr / Rep	Contr	Rep	6	O76522;Q9UB78;Q9V455	20.2674	28.3924	0.486342	0.486342	40.0889	1.40089	0	0.0362612	0.0171233	5	0.174379	O76522;Q9UB78;Q9V455	O76522_DROME;Q9UB78_DROME;Q9V455_DROME	Karyopherin alpha 3 (Fragment);Importin subunit alpha;Importin subunit alpha	Kap-alpha3	O76522;Q9UB78;Q9V455	Drosophila melanogaster	tr		2;2;1	1	uniprot-drosophila_reviewed_unreviewed_0825_2016	>tr|O76522|O76522_DROME Karyopherin alpha 3 (Fragment) OS=Drosophila melanogaster GN=Kap-alpha3 PE=2 SV=1;>tr|Q9UB78|Q9UB78_DROME Importin subunit alpha OS=Drosophila melanogaster GN=Kap-alpha3 PE=2 SV=1;>tr|Q9V455|Q9V455_DROME Importin subunit alpha OS=Drosophila melanogaster GN=Kap-alpha3 PE=1 SV=1	1	1
TRUE	Contr / Rep	Contr	Rep	12	Q9VT75	69.7356	115.176	0.723875	0.723875	65.1612	1.65161	0	0.0365327	0.0172117	11	0.231395	Q9VT75	Q9VT75_DROME	LD19812p	vnc	Q9VT75	Drosophila melanogaster	tr		1	1	uniprot-drosophila_reviewed_unreviewed_0825_2016	>tr|Q9VT75|Q9VT75_DROME LD19812p OS=Drosophila melanogaster GN=vnc PE=1 SV=1	2	2
TRUE	Contr / Rep	Contr	Rep	54	Q94523	1342.96	1777.58	0.404505	0.404505	32.3635	1.32363	0	0.0371147	0.0174456	53	0.0983614	Q94523	SDHA_DROME	Succinate dehydrogenase [ubiquinone] flavoprotein subunit, mitochondrial,Succinate dehydrogenase [ubiquinone] flavoprotein subunit, mitochondrial	SdhA	Q94523	Drosophila melanogaster	sp		2	3	uniprot-drosophila_reviewed_unreviewed_0825_2016	>sp|Q94523|SDHA_DROME Succinate dehydrogenase [ubiquinone] flavoprotein subunit, mitochondrial OS=Drosophila melanogaster GN=SdhA PE=2 SV=3,>sp|Q94523|SDHA_DROME Succinate dehydrogenase [ubiquinone] flavoprotein subunit, mitochondrial OS=Drosophila melanogaster GN=SdhA PE=2 SV=3	6	12
TRUE	Contr / Rep	Contr	Rep	72	Q9VWH4	72941.2	61189.5	-0.25345	0.25345	-16.1112	0.838888	0	0.0381698	0.0179003	71	0.0899056	Q9VWH4	IDH3A_DROME	Probable isocitrate dehydrogenase [NAD] subunit alpha, mitochondrial,Probable isocitrate dehydrogenase [NAD] subunit alpha, mitochondrial	l(1)G0156	Q9VWH4	Drosophila melanogaster	sp		2	1	uniprot-drosophila_reviewed_unreviewed_0825_2016	>sp|Q9VWH4|IDH3A_DROME Probable isocitrate dehydrogenase [NAD] subunit alpha, mitochondrial OS=Drosophila melanogaster GN=l(1)G0156 PE=2 SV=1,>sp|Q9VWH4|IDH3A_DROME Probable isocitrate dehydrogenase [NAD] subunit alpha, mitochondrial OS=Drosophila melanogaster GN=l(1)G0156 PE=2 SV=1	11	12
TRUE	Contr / Rep	Contr	Rep	42	Q0KHZ6;Q8MR58	24888.3	26076.4	0.0672758	0.0672758	4.77364	1.04774	0	0.0382988	0.0179196	41	0.140822	Q0KHZ6;Q8MR58	Q0KHZ6_DROME;Q8MR58_DROME	CG7834, isoform A;GH14462p (Fragment)	CG7834	Q0KHZ6;Q8MR58	Drosophila melanogaster	tr		1;2	1	uniprot-drosophila_reviewed_unreviewed_0825_2016	>tr|Q0KHZ6|Q0KHZ6_DROME CG7834, isoform A OS=Drosophila melanogaster GN=CG7834 PE=1 SV=1;>tr|Q8MR58|Q8MR58_DROME GH14462p (Fragment) OS=Drosophila melanogaster GN=CG7834 PE=2 SV=1	7	7
TRUE	Contr / Rep	Contr	Rep	12	O17311;O17312;Q9VUJ1	474.161	862.605	0.863322	0.863322	81.9223	1.81922	0	0.0385731	0.0179828	11	0.964211	O17311;O17312;Q9VUJ1	O17311_DROME;O17312_DROME;Q9VUJ1_DROME	Proteasome subunit beta type	Prosbeta2	O17311;O17312;Q9VUJ1	Drosophila melanogaster	tr		2;3;1	1	uniprot-drosophila_reviewed_unreviewed_0825_2016	>tr|O17311|O17311_DROME Proteasome subunit beta type OS=Drosophila melanogaster GN=Prosbeta2 PE=2 SV=1;>tr|O17312|O17312_DROME Proteasome subunit beta type OS=Drosophila melanogaster GN=Prosbeta2 PE=3 SV=1;>tr|Q9VUJ1|Q9VUJ1_DROME Proteasome subunit beta type OS=Drosophila melanogaster GN=Prosbeta2 PE=1 SV=1	2	2
TRUE	Contr / Rep	Contr	Rep	12	Q9VJD4	184.351	148.459	-0.312387	0.312387	-19.4692	0.805308	0	0.03861	0.0179828	11	0.185895	Q9VJD4	Q9VJD4_DROME	LD24721p	Sgt	Q9VJD4	Drosophila melanogaster	tr		1	1	uniprot-drosophila_reviewed_unreviewed_0825_2016	>tr|Q9VJD4|Q9VJD4_DROME LD24721p OS=Drosophila melanogaster GN=Sgt PE=1 SV=1	2	2
TRUE	Contr / Rep	Contr	Rep	18	Q9V3V9	269.233	223.688	-0.267364	0.267364	-16.9164	0.830836	0	0.0402917	0.0186807	17	0.132962	Q9V3V9	Q9V3V9_DROME	Endonuclease G inhibitor, isoform A	EndoGI	Q9V3V9	Drosophila melanogaster	tr		1	1	uniprot-drosophila_reviewed_unreviewed_0825_2016	>tr|Q9V3V9|Q9V3V9_DROME Endonuclease G inhibitor, isoform A OS=Drosophila melanogaster GN=EndoGI PE=1 SV=1	3	3
TRUE	Contr / Rep	Contr	Rep	48	O16043	967.092	839.704	-0.203773	0.203773	-13.1723	0.868277	0	0.040201	0.0186807	47	0.132799	O16043	O16043_DROME	Anon1A4	Df31	O16043	Drosophila melanogaster	tr		1	1	uniprot-drosophila_reviewed_unreviewed_0825_2016	>tr|O16043|O16043_DROME Anon1A4 OS=Drosophila melanogaster GN=Df31 PE=1 SV=1	6	11
TRUE	Contr / Rep	Contr	Rep	6	Q7K3W2	46.1312	70.6591	0.615133	0.615133	53.1699	1.5317	0	0.0410324	0.0189576	5	0.204387	Q7K3W2	Q7K3W2_DROME	CG8728	CG8728-RA	Q7K3W2	Drosophila melanogaster	tr		1	1	uniprot-drosophila_reviewed_unreviewed_0825_2016	>tr|Q7K3W2|Q7K3W2_DROME CG8728 OS=Drosophila melanogaster GN=CG8728-RA PE=1 SV=1	1	1
TRUE	Contr / Rep	Contr	Rep	6	C7LAD5;Q8IQS5	15.612	20.7903	0.413254	0.413254	33.1686	1.33169	0	0.0410749	0.0189576	5	0.156703	C7LAD5;Q8IQS5	C7LAD5_DROME;Q8IQS5_DROME	RE21427p (Fragment);Uncharacterized protein, isoform A	CG32195-RA;CG32195	C7LAD5;Q8IQS5	Drosophila melanogaster	tr		2;4	1	uniprot-drosophila_reviewed_unreviewed_0825_2016	>tr|C7LAD5|C7LAD5_DROME RE21427p (Fragment) OS=Drosophila melanogaster GN=CG32195-RA PE=2 SV=1;>tr|Q8IQS5|Q8IQS5_DROME Uncharacterized protein, isoform A OS=Drosophila melanogaster GN=CG32195 PE=4 SV=1	1	1
TRUE	Contr / Rep	Contr	Rep	6	Q9W266	22.7543	13.674	-0.734707	0.734707	-39.906	0.60094	0	0.0411699	0.0189586	5	0.244272	Q9W266	WDP_DROME	Protein windpipe	wdp	Q9W266	Drosophila melanogaster	sp		1	1	uniprot-drosophila_reviewed_unreviewed_0825_2016	>sp|Q9W266|WDP_DROME Protein windpipe OS=Drosophila melanogaster GN=wdp PE=1 SV=1,>sp|Q9W266|WDP_DROME Protein windpipe OS=Drosophila melanogaster GN=wdp PE=1 SV=1	1	1
TRUE	Contr / Rep	Contr	Rep	6	Q7K4Q9	133.245	106.901	-0.317797	0.317797	-19.7706	0.802294	0	0.0415163	0.0190751	5	0.107054	Q7K4Q9	Q7K4Q9_DROME	HMG coenzyme A synthase, isoform A	Hmgs	Q7K4Q9	Drosophila melanogaster	tr		1	1	uniprot-drosophila_reviewed_unreviewed_0825_2016	>tr|Q7K4Q9|Q7K4Q9_DROME HMG coenzyme A synthase, isoform A OS=Drosophila melanogaster GN=Hmgs PE=1 SV=1	1	1
TRUE	Contr / Rep	Contr	Rep	25	Q8IGG7;Q8IPP8	1469.56	2063.06	0.489404	0.489404	40.3865	1.40386	0	0.042566	0.0195134	24	0.156374	Q8IGG7;Q8IPP8	Q8IGG7_DROME;Q8IPP8_DROME	RH24570p (Fragment);Uncharacterized protein	CG2907;CG31548	Q8IGG7;Q8IPP8	Drosophila melanogaster	tr		2;1	1	uniprot-drosophila_reviewed_unreviewed_0825_2016	>tr|Q8IGG7|Q8IGG7_DROME RH24570p (Fragment) OS=Drosophila melanogaster GN=CG2907 PE=2 SV=1;>tr|Q8IPP8|Q8IPP8_DROME Uncharacterized protein OS=Drosophila melanogaster GN=CG31548 PE=1 SV=1	5	6
TRUE	Contr / Rep	Contr	Rep	24	O16040;Q86PC7;Q8I0J1;Q8IGY5;Q8IMG1;Q9V9U3	165.927	155.373	-0.0948204	0.0948204	-6.36112	0.936389	0	0.0432837	0.0197979	23	0.14838	O16040;Q86PC7;Q8I0J1;Q8IGY5;Q8IMG1;Q9V9U3	O16040_DROME;Q86PC7_DROME;Q8I0J1_DROME;Q8IGY5_DROME;Q8IMG1_DROME;Q9V9U3_DROME	Anon1A3 (Fragment);SD23516p;CG1910, isoform D;RE05782p (Fragment);CG1910, isoform C;CG1910, isoform A	anon1A3;CG1910;CG1910;CG1910;CG1910;CG1910	O16040;Q86PC7;Q8I0J1;Q8IGY5;Q8IMG1;Q9V9U3	Drosophila melanogaster	tr		2;2;1;2;1;1	1	uniprot-drosophila_reviewed_unreviewed_0825_2016	>tr|O16040|O16040_DROME Anon1A3 (Fragment) OS=Drosophila melanogaster GN=anon1A3 PE=2 SV=1;>tr|Q86PC7|Q86PC7_DROME SD23516p OS=Drosophila melanogaster GN=CG1910 PE=2 SV=1;>tr|Q8I0J1|Q8I0J1_DROME CG1910, isoform D OS=Drosophila melanogaster GN=CG1910 PE=1 SV=1;>tr|Q8IGY5|Q8IGY5_DROME RE05782p (Fragment) OS=Drosophila melanogaster GN=CG1910 PE=2 SV=1;>tr|Q8IMG1|Q8IMG1_DROME CG1910, isoform C OS=Dro…	4	4
TRUE	Contr / Rep	Contr	Rep	6	A0A0B4K6T1;A0A0B4K7U5;A0A0B4KFC5;A0A126GUM8;D0Z768;E1JH02;Q290X3;Q86S05	8.94719	4.50591	-0.989615	0.989615	-49.6388	0.503612	0	0.0436215	0.0199078	5	0.327149	A0A0B4K6T1;A0A0B4K7U5;A0A0B4KFC5;A0A126GUM8;D0Z768;E1JH02;Q290X3;Q86S05,Q86S05	A0A0B4K6T1_DROME;A0A0B4K7U5_DROME;A0A0B4KFC5_DROME;A0A126GUM8_DROME;D0Z768_DROME;E1JH02_DROME;LIG_DROPS;LIG_DROME,LIG_DROME	Lingerer, isoform I;Lingerer, isoform H;Lingerer, isoform K;Lingerer, isoform L;Lingerer, isoform J;Lingerer, isoform E;Protein lingerer;Protein lingerer,Protein lingerer	lig	A0A0B4K6T1;A0A0B4K7U5;A0A0B4KFC5;A0A126GUM8;D0Z768;E1JH02;Q290X3;Q86S05,Q86S05	Drosophila melanogaster;Drosophila melanogaster;Drosophila melanogaster;Drosophila melanogaster;Drosophila melanogaster;Drosophila melanogaster;Drosophila pseudoobscura pseudoobscura;Drosophila melanogaster,Drosophila melanogaster	tr;tr;tr;tr;tr;tr;sp;sp,sp		1;1;1;1;1;1;3;1,1	1;1;1;1;1;1;3;1,1	uniprot-drosophila_reviewed_unreviewed_0825_2016	>tr|A0A0B4K6T1|A0A0B4K6T1_DROME Lingerer, isoform I OS=Drosophila melanogaster GN=lig PE=1 SV=1;>tr|A0A0B4K7U5|A0A0B4K7U5_DROME Lingerer, isoform H OS=Drosophila melanogaster GN=lig PE=1 SV=1;>tr|A0A0B4KFC5|A0A0B4KFC5_DROME Lingerer, isoform K OS=Drosophila melanogaster GN=lig PE=1 SV=1;>tr|A0A126GUM8|A0A126GUM8_DROME Lingerer, isoform L OS=Drosophila melanogaster GN=lig PE=1 SV=1;>tr|D0Z768|D0Z7…	1	1
TRUE	Contr / Rep	Contr	Rep	6	Q9VHE4	53.4284	19.8729	-1.4268	1.4268	-62.8046	0.371954	0	0.0448969	0.0203986	5	0.69559	Q9VHE4	Q9VHE4_DROME	CG8132	CG8132	Q9VHE4	Drosophila melanogaster	tr		1	1	uniprot-drosophila_reviewed_unreviewed_0825_2016	>tr|Q9VHE4|Q9VHE4_DROME CG8132 OS=Drosophila melanogaster GN=CG8132 PE=1 SV=1	1	1
TRUE	Contr / Rep	Contr	Rep	6	L7EEF1;Q7PLL1;Q7PLL3;Q8SYL3	32.1424	42.6157	0.406906	0.406906	32.584	1.32584	0	0.0448337	0.0203986	5	0.132892	L7EEF1;Q7PLL1;Q7PLL3;Q8SYL3	L7EEF1_DROME;Q7PLL1_DROME;Q7PLL3_DROME;Q8SYL3_DROME	Eukaryotic initiation factor 4B, isoform F;Eukaryotic initiation factor 4B, isoform E;Eukaryotic initiation factor 4B;Eukaryotic initiation factor 4B	eIF-4B	L7EEF1;Q7PLL1;Q7PLL3;Q8SYL3	Drosophila melanogaster	tr		1	1;2;1;1	uniprot-drosophila_reviewed_unreviewed_0825_2016	>tr|L7EEF1|L7EEF1_DROME Eukaryotic initiation factor 4B, isoform F OS=Drosophila melanogaster GN=eIF-4B PE=1 SV=1;>tr|Q7PLL1|Q7PLL1_DROME Eukaryotic initiation factor 4B, isoform E OS=Drosophila melanogaster GN=eIF-4B PE=1 SV=2;>tr|Q7PLL3|Q7PLL3_DROME Eukaryotic initiation factor 4B OS=Drosophila melanogaster GN=eIF-4B PE=1 SV=1;>tr|Q8SYL3|Q8SYL3_DROME Eukaryotic initiation factor 4B OS=Drosophil…	2	4
TRUE	Contr / Rep	Contr	Rep	6	C1C577;M9Z4Q3;Q9VBU0	39.7627	51.4108	0.370655	0.370655	29.294	1.29294	0	0.0462772	0.020979	5	0.138779	C1C577;M9Z4Q3;Q9VBU0	C1C577_DROME;M9Z4Q3_DROME;Q9VBU0_DROME	MIP04440p (Fragment);MIP26177p1;Uncharacterized protein, isoform A	CG11891-RD;CG11891-RD;CG11889	C1C577;M9Z4Q3;Q9VBU0	Drosophila melanogaster	tr		2;2;4	1;1;2	uniprot-drosophila_reviewed_unreviewed_0825_2016	>tr|C1C577|C1C577_DROME MIP04440p (Fragment) OS=Drosophila melanogaster GN=CG11891-RD PE=2 SV=1;>tr|M9Z4Q3|M9Z4Q3_DROME MIP26177p1 OS=Drosophila melanogaster GN=CG11891-RD PE=2 SV=1;>tr|Q9VBU0|Q9VBU0_DROME Uncharacterized protein, isoform A OS=Drosophila melanogaster GN=CG11889 PE=4 SV=2	1	1
TRUE	Contr / Rep	Contr	Rep	42	F6J6B9;Q9V3P0;X2JF59	91958.3	78786.8	-0.223027	0.223027	-14.3234	0.856766	0	0.0477645	0.0216052	41	0.212178	F6J6B9;Q9V3P0,Q9V3P0;X2JF59	F6J6B9_DROME;PRDX1_DROME,PRDX1_DROME;X2JF59_DROME	CG1633 (Fragment);Peroxiredoxin 1,Peroxiredoxin 1;Thioredoxin peroxidase 1, isoform C	CG1633;Jafrac1,Jafrac1;Jafrac1	F6J6B9;Q9V3P0,Q9V3P0;X2JF59	Drosophila melanogaster	tr;sp,sp;tr		4;1,1;1	1	uniprot-drosophila_reviewed_unreviewed_0825_2016	>tr|F6J6B9|F6J6B9_DROME CG1633 (Fragment) OS=Drosophila melanogaster GN=CG1633 PE=4 SV=1;>sp|Q9V3P0|PRDX1_DROME Peroxiredoxin 1 OS=Drosophila melanogaster GN=Jafrac1 PE=1 SV=1,>sp|Q9V3P0|PRDX1_DROME Peroxiredoxin 1 OS=Drosophila melanogaster GN=Jafrac1 PE=1 SV=1;>tr|X2JF59|X2JF59_DROME Thioredoxin peroxidase 1, isoform C OS=Drosophila melanogaster GN=Jafrac1 PE=1 SV=1	7	7
TRUE	Contr / Rep	Contr	Rep	26	P50887	2137.95	1540.08	-0.473219	0.473219	-27.9645	0.720355	0	0.0480378	0.0216808	25	0.125472	P50887	RL22_DROME	60S ribosomal protein L22	RpL22	P50887	Drosophila melanogaster	sp		1	2	uniprot-drosophila_reviewed_unreviewed_0825_2016	>sp|P50887|RL22_DROME 60S ribosomal protein L22 OS=Drosophila melanogaster GN=RpL22 PE=1 SV=2,>sp|P50887|RL22_DROME 60S ribosomal protein L22 OS=Drosophila melanogaster GN=RpL22 PE=1 SV=2	3	5
TRUE	Contr / Rep	Contr	Rep	36	Q59E09;Q9VP61	5948.23	7846.22	0.399537	0.399537	31.9084	1.31908	0	0.0488288	0.0219891	35	0.178727	Q59E09;Q9VP61,Q9VP61	Q59E09_DROME;ACSA_DROME,ACSA_DROME	Acetyl-coenzyme A synthetase	AcCoAS	Q59E09;Q9VP61,Q9VP61	Drosophila melanogaster	tr;sp,sp		1;2,2	2;1,1	uniprot-drosophila_reviewed_unreviewed_0825_2016	>tr|Q59E09|Q59E09_DROME Acetyl-coenzyme A synthetase OS=Drosophila melanogaster GN=AcCoAS PE=1 SV=2;>sp|Q9VP61|ACSA_DROME Acetyl-coenzyme A synthetase OS=Drosophila melanogaster GN=AcCoAS PE=2 SV=1,>sp|Q9VP61|ACSA_DROME Acetyl-coenzyme A synthetase OS=Drosophila melanogaster GN=AcCoAS PE=2 SV=1	6	6
TRUE	Contr / Rep	Contr	Rep	6	A8DY49;A9UNH4	1001.41	1197.05	0.257449	0.257449	19.5363	1.19536	0	0.0495338	0.0222123	5	0.0970874	A8DY49;A9UNH4	A8DY49_DROME;A9UNH4_DROME	Uncharacterized protein;LP20105p (Fragment)	CG34215;	A8DY49;A9UNH4	Drosophila melanogaster	tr		1;2	1	uniprot-drosophila_reviewed_unreviewed_0825_2016	>tr|A8DY49|A8DY49_DROME Uncharacterized protein OS=Drosophila melanogaster GN=CG34215 PE=1 SV=1;>tr|A9UNH4|A9UNH4_DROME LP20105p (Fragment) OS=Drosophila melanogaster PE=2 SV=1	1	1
TRUE	Contr / Rep	Contr	Rep	6	Q9VRD9	15.6886	24.2096	0.625859	0.625859	54.313	1.54313	0	0.0496394	0.0222123	5	0.266247	Q9VRD9	Q9VRD9_DROME	Cystathionine beta-synthase	Cbs	Q9VRD9	Drosophila melanogaster	tr		1	1	uniprot-drosophila_reviewed_unreviewed_0825_2016	>tr|Q9VRD9|Q9VRD9_DROME Cystathionine beta-synthase OS=Drosophila melanogaster GN=Cbs PE=1 SV=1	1	1
TRUE	Contr / Rep	Contr	Rep	12	Q29QV3;Q9VKV2	10.4296	15.2879	0.551698	0.551698	46.581	1.46581	0	0.049651	0.0222123	11	0.257537	Q29QV3;Q9VKV2	Q29QV3_DROME;Q9VKV2_DROME	Alpha-mannosidase (Fragment);Alpha-mannosidase	;LManI	Q29QV3;Q9VKV2	Drosophila melanogaster	tr		2;3	1	uniprot-drosophila_reviewed_unreviewed_0825_2016	>tr|Q29QV3|Q29QV3_DROME Alpha-mannosidase (Fragment) OS=Drosophila melanogaster PE=2 SV=1;>tr|Q9VKV2|Q9VKV2_DROME Alpha-mannosidase OS=Drosophila melanogaster GN=LManI PE=3 SV=1	2	2
TRUE	Contr / Rep	Contr	Rep	12	Q8MZ52;Q9VBT6	219.998	298.374	0.43963	0.43963	35.6257	1.35626	0	0.0504518	0.022472	11	0.167808	Q8MZ52;Q9VBT6	Q8MZ52_DROME;Q9VBT6_DROME	GH20308p;LP23833p	CG10514	Q8MZ52;Q9VBT6	Drosophila melanogaster	tr		2	1	uniprot-drosophila_reviewed_unreviewed_0825_2016	>tr|Q8MZ52|Q8MZ52_DROME GH20308p OS=Drosophila melanogaster GN=CG10514 PE=2 SV=1;>tr|Q9VBT6|Q9VBT6_DROME LP23833p OS=Drosophila melanogaster GN=CG10514 PE=2 SV=1	2	2
TRUE	Contr / Rep	Contr	Rep	12	Q5BHY9;Q9VDK7	28.5802	20.2175	-0.499407	0.499407	-29.2602	0.707398	0	0.05045	0.022472	11	0.127091	Q5BHY9;Q9VDK7	Q5BHY9_DROME;Q9VDK7_DROME	Signal recognition particle subunit SRP72	Srp72	Q5BHY9;Q9VDK7	Drosophila melanogaster	tr		2;1	1	uniprot-drosophila_reviewed_unreviewed_0825_2016	>tr|Q5BHY9|Q5BHY9_DROME Signal recognition particle subunit SRP72 OS=Drosophila melanogaster GN=Srp72 PE=2 SV=1;>tr|Q9VDK7|Q9VDK7_DROME Signal recognition particle subunit SRP72 OS=Drosophila melanogaster GN=Srp72 PE=1 SV=1	2	2
TRUE	Contr / Rep	Contr	Rep	54	A0A0U1RVK6;Q9VIS3;X2JES1	16116.8	14588.4	-0.143745	0.143745	-9.48332	0.905167	0	0.0508274	0.0225418	53	0.0743811	A0A0U1RVK6;Q9VIS3;X2JES1	A0A0U1RVK6_DROME;Q9VIS3_DROME;X2JES1_DROME	Fructose-1,6-bisphosphatase, isoform F;Fructose-1,6-bisphosphatase;Fructose-1,6-bisphosphatase, isoform C	fbp	A0A0U1RVK6;Q9VIS3;X2JES1	Drosophila melanogaster	tr		1	1	uniprot-drosophila_reviewed_unreviewed_0825_2016	>tr|A0A0U1RVK6|A0A0U1RVK6_DROME Fructose-1,6-bisphosphatase, isoform F OS=Drosophila melanogaster GN=fbp PE=1 SV=1;>tr|Q9VIS3|Q9VIS3_DROME Fructose-1,6-bisphosphatase OS=Drosophila melanogaster GN=fbp PE=1 SV=1;>tr|X2JES1|X2JES1_DROME Fructose-1,6-bisphosphatase, isoform C OS=Drosophila melanogaster GN=fbp PE=1 SV=1	8	9
TRUE	Contr / Rep	Contr	Rep	24	Q9V3U6	1736.72	1111.4	-0.643989	0.643989	-36.0059	0.639941	0	0.0508295	0.0225418	23	0.300083	Q9V3U6	Q9V3U6_DROME	26-29kD-proteinase	26-29-p	Q9V3U6	Drosophila melanogaster	tr		1	1	uniprot-drosophila_reviewed_unreviewed_0825_2016	>tr|Q9V3U6|Q9V3U6_DROME 26-29kD-proteinase OS=Drosophila melanogaster GN=26-29-p PE=1 SV=1	4	4
TRUE	Contr / Rep	Contr	Rep	12	Q94516	78.7301	41.3927	-0.92754	0.92754	-47.4246	0.525754	0	0.0513938	0.0227426	11	0.553335	Q94516	AT5F1_DROME	ATP synthase subunit b, mitochondrial,ATP synthase subunit b, mitochondrial	ATPsynB	Q94516	Drosophila melanogaster	sp		2	2	uniprot-drosophila_reviewed_unreviewed_0825_2016	>sp|Q94516|AT5F1_DROME ATP synthase subunit b, mitochondrial OS=Drosophila melanogaster GN=ATPsynB PE=2 SV=2,>sp|Q94516|AT5F1_DROME ATP synthase subunit b, mitochondrial OS=Drosophila melanogaster GN=ATPsynB PE=2 SV=2	2	2
TRUE	Contr / Rep	Contr	Rep	6	P32392	646.369	496.61	-0.380245	0.380245	-23.1693	0.768307	0	0.0523304	0.0231069	5	0.134532	P32392	ARP3_DROME	Actin-related protein 3	Arp3	P32392	Drosophila melanogaster	sp		2	3	uniprot-drosophila_reviewed_unreviewed_0825_2016	>sp|P32392|ARP3_DROME Actin-related protein 3 OS=Drosophila melanogaster GN=Arp3 PE=2 SV=3,>sp|P32392|ARP3_DROME Actin-related protein 3 OS=Drosophila melanogaster GN=Arp3 PE=2 SV=3	1	1
TRUE	Contr / Rep	Contr	Rep	12	P10351;P22811;P91711	91.3824	104.872	0.198639	0.198639	14.7615	1.14762	0	0.0528271	0.0232759	11	0.116748	P10351,P10351;P22811;P91711	XDH_DROME,XDH_DROME;XDH_DROPS;XDH_DROSU	Xanthine dehydrogenase	ry,ry;ry;Xdh	P10351,P10351;P22811;P91711	Drosophila melanogaster,Drosophila melanogaster;Drosophila pseudoobscura pseudoobscura;Drosophila subobscura	sp		2,2;3;3	2,2;2;1	uniprot-drosophila_reviewed_unreviewed_0825_2016	>sp|P10351|XDH_DROME Xanthine dehydrogenase OS=Drosophila melanogaster GN=ry PE=2 SV=2,>sp|P10351|XDH_DROME Xanthine dehydrogenase OS=Drosophila melanogaster GN=ry PE=2 SV=2;>sp|P22811|XDH_DROPS Xanthine dehydrogenase OS=Drosophila pseudoobscura pseudoobscura GN=ry PE=3 SV=2;>sp|P91711|XDH_DROSU Xanthine dehydrogenase OS=Drosophila subobscura GN=Xdh PE=3 SV=1	2	2
TRUE	Contr / Rep	Contr	Rep	6	M9PB12;Q9VQC4	17.2547	30.0456	0.800168	0.800168	74.1304	1.7413	0	0.053052	0.0233246	5	0.369432	M9PB12;Q9VQC4,Q9VQC4	M9PB12_DROME;GLCTK_DROME,GLCTK_DROME	CG9886, isoform B;Glycerate kinase,Glycerate kinase	CG9886;Glyctk,Glyctk	M9PB12;Q9VQC4,Q9VQC4	Drosophila melanogaster	tr;sp,sp		4;2,2	1	uniprot-drosophila_reviewed_unreviewed_0825_2016	>tr|M9PB12|M9PB12_DROME CG9886, isoform B OS=Drosophila melanogaster GN=CG9886 PE=4 SV=1;>sp|Q9VQC4|GLCTK_DROME Glycerate kinase OS=Drosophila melanogaster GN=Glyctk PE=2 SV=1,>sp|Q9VQC4|GLCTK_DROME Glycerate kinase OS=Drosophila melanogaster GN=Glyctk PE=2 SV=1	1	1
TRUE	Contr / Rep	Contr	Rep	6	Q4V4W5;Q9V3G1	10.7843	5.83705	-0.885617	0.885617	-45.8744	0.541256	0	0.0546251	0.0239646	5	0.292577	Q4V4W5;Q9V3G1,Q9V3G1	Q4V4W5_DROME;RL8_DROME,RL8_DROME	IP12501p (Fragment);60S ribosomal protein L8,60S ribosomal protein L8	CG31664;RpL8,RpL8	Q4V4W5;Q9V3G1,Q9V3G1	Drosophila melanogaster	tr;sp,sp		2;1,1	1	uniprot-drosophila_reviewed_unreviewed_0825_2016	>tr|Q4V4W5|Q4V4W5_DROME IP12501p (Fragment) OS=Drosophila melanogaster GN=CG31664 PE=2 SV=1;>sp|Q9V3G1|RL8_DROME 60S ribosomal protein L8 OS=Drosophila melanogaster GN=RpL8 PE=1 SV=1,>sp|Q9V3G1|RL8_DROME 60S ribosomal protein L8 OS=Drosophila melanogaster GN=RpL8 PE=1 SV=1	1	1
TRUE	Contr / Rep	Contr	Rep	6	Q7K206;Q9VSL4	26.346	18.1707	-0.535972	0.535972	-31.0306	0.689694	0	0.0551534	0.0241444	5	0.219923	Q7K206;Q9VSL4	Q7K206_DROME;Q9VSL4_DROME	LD27185p (Fragment);Glutathione S transferase O2, isoform B	GstO2	Q7K206;Q9VSL4	Drosophila melanogaster	tr		2;1	1;2	uniprot-drosophila_reviewed_unreviewed_0825_2016	>tr|Q7K206|Q7K206_DROME LD27185p (Fragment) OS=Drosophila melanogaster GN=GstO2 PE=2 SV=1;>tr|Q9VSL4|Q9VSL4_DROME Glutathione S transferase O2, isoform B OS=Drosophila melanogaster GN=GstO2 PE=1 SV=2	1	1
TRUE	Contr / Rep	Contr	Rep	36	Q7K084	8387.46	9247.86	0.140885	0.140885	10.2581	1.10258	0	0.0560398	0.0244799	35	0.232878	Q7K084	Q7K084_DROME	Odorant-binding protein 44a, isoform A	Obp44a	Q7K084	Drosophila melanogaster	tr		1	1	uniprot-drosophila_reviewed_unreviewed_0825_2016	>tr|Q7K084|Q7K084_DROME Odorant-binding protein 44a, isoform A OS=Drosophila melanogaster GN=Obp44a PE=1 SV=1	6	6
TRUE	Contr / Rep	Contr	Rep	6	Q9VTW0;Q9VTW1;X2JB05;X2JGL7	112.348	75.865	-0.566475	0.566475	-32.4735	0.675265	0	0.0564278	0.0245967	5	0.232886	Q9VTW0;Q9VTW1;X2JB05;X2JGL7	Q9VTW0_DROME;Q9VTW1_DROME;X2JB05_DROME;X2JGL7_DROME	CG4300, isoform A;CG4300, isoform B;CG4300, isoform C;CG4300, isoform D	CG4300	Q9VTW0;Q9VTW1;X2JB05;X2JGL7	Drosophila melanogaster	tr		1	1	uniprot-drosophila_reviewed_unreviewed_0825_2016	>tr|Q9VTW0|Q9VTW0_DROME CG4300, isoform A OS=Drosophila melanogaster GN=CG4300 PE=1 SV=1;>tr|Q9VTW1|Q9VTW1_DROME CG4300, isoform B OS=Drosophila melanogaster GN=CG4300 PE=1 SV=1;>tr|X2JB05|X2JB05_DROME CG4300, isoform C OS=Drosophila melanogaster GN=CG4300 PE=1 SV=1;>tr|X2JGL7|X2JGL7_DROME CG4300, isoform D OS=Drosophila melanogaster GN=CG4300 PE=1 SV=1	1	1
TRUE	Contr / Rep	Contr	Rep	60	Q3YMU0;Q9TWZ1	2138.88	1810.54	-0.240441	0.240441	-15.3514	0.846486	0	0.057374	0.0249559	59	0.143032	Q3YMU0;Q9TWZ1	Q3YMU0_DROME;Q9TWZ1_DROME	Protein disulfide-isomerase (Fragment);Protein disulfide-isomerase	ERp60;	Q3YMU0;Q9TWZ1	Drosophila melanogaster	tr		1;3	1	uniprot-drosophila_reviewed_unreviewed_0825_2016	>tr|Q3YMU0|Q3YMU0_DROME Protein disulfide-isomerase (Fragment) OS=Drosophila melanogaster GN=ERp60 PE=1 SV=1;>tr|Q9TWZ1|Q9TWZ1_DROME Protein disulfide-isomerase OS=Drosophila melanogaster PE=3 SV=1	5	11
TRUE	Contr / Rep	Contr	Rep	12	Q9V4I1	43.6054	103.627	1.24882	1.24882	137.647	2.37647	0	0.0590064	0.0256113	11	0.468189	Q9V4I1	CP9B2_DROME	Cytochrome P450 9b2	Cyp9b2	Q9V4I1	Drosophila melanogaster	sp		2	1	uniprot-drosophila_reviewed_unreviewed_0825_2016	>sp|Q9V4I1|CP9B2_DROME Cytochrome P450 9b2 OS=Drosophila melanogaster GN=Cyp9b2 PE=2 SV=1,>sp|Q9V4I1|CP9B2_DROME Cytochrome P450 9b2 OS=Drosophila melanogaster GN=Cyp9b2 PE=2 SV=1	2	2
TRUE	Contr / Rep	Contr	Rep	6	Q9W3C3	28.7355	72.9483	1.34404	1.34404	153.861	2.53861	0	0.0600529	0.0260102	5	0.844581	Q9W3C3	Q9W3C3_DROME	CG2004, isoform A	CG2004	Q9W3C3	Drosophila melanogaster	tr		1	1	uniprot-drosophila_reviewed_unreviewed_0825_2016	>tr|Q9W3C3|Q9W3C3_DROME CG2004, isoform A OS=Drosophila melanogaster GN=CG2004 PE=1 SV=1	1	1
TRUE	Contr / Rep	Contr	Rep	6	Q9VAW3	71.5135	53.8444	-0.40942	0.40942	-24.7074	0.752926	0	0.0605529	0.0261712	5	0.163876	Q9VAW3	Q9VAW3_DROME	GH12731p	Gfat2	Q9VAW3	Drosophila melanogaster	tr		1	1	uniprot-drosophila_reviewed_unreviewed_0825_2016	>tr|Q9VAW3|Q9VAW3_DROME GH12731p OS=Drosophila melanogaster GN=Gfat2 PE=1 SV=1	1	1
TRUE	Contr / Rep	Contr	Rep	24	Q9VJZ6	351.208	304.715	-0.204863	0.204863	-13.2379	0.867621	0	0.0618506	0.0266225	23	0.149551	Q9VJZ6	Q9VJZ6_DROME	CG6523	CG6523	Q9VJZ6	Drosophila melanogaster	tr		1	1	uniprot-drosophila_reviewed_unreviewed_0825_2016	>tr|Q9VJZ6|Q9VJZ6_DROME CG6523 OS=Drosophila melanogaster GN=CG6523 PE=1 SV=1	3	4
TRUE	Contr / Rep	Contr	Rep	6	P17917	34.5736	26.7843	-0.368283	0.368283	-22.5296	0.774704	0	0.0618582	0.0266225	5	0.148653	P17917	PCNA_DROME	Proliferating cell nuclear antigen	PCNA	P17917	Drosophila melanogaster	sp		1	2	uniprot-drosophila_reviewed_unreviewed_0825_2016	>sp|P17917|PCNA_DROME Proliferating cell nuclear antigen OS=Drosophila melanogaster GN=PCNA PE=1 SV=2,>sp|P17917|PCNA_DROME Proliferating cell nuclear antigen OS=Drosophila melanogaster GN=PCNA PE=1 SV=2	1	1
TRUE	Contr / Rep	Contr	Rep	12	Q8IGN0;Q8T6I0;Q8T8W3	57.1324	44.0344	-0.375677	0.375677	-22.9256	0.770744	0	0.062107	0.0266733	11	0.167499	Q8IGN0;Q8T6I0;Q8T8W3	Q8IGN0_DROME;Q8T6I0_DROME;Q8T8W3_DROME	RE59368p;EH domain containing protein;AT21416p	Past1	Q8IGN0;Q8T6I0;Q8T8W3	Drosophila melanogaster	tr		2;1;1	1	uniprot-drosophila_reviewed_unreviewed_0825_2016	>tr|Q8IGN0|Q8IGN0_DROME RE59368p OS=Drosophila melanogaster GN=Past1 PE=2 SV=1;>tr|Q8T6I0|Q8T6I0_DROME EH domain containing protein OS=Drosophila melanogaster GN=Past1 PE=1 SV=1;>tr|Q8T8W3|Q8T8W3_DROME AT21416p OS=Drosophila melanogaster GN=Past1 PE=1 SV=1	2	2
TRUE	Contr / Rep	Contr	Rep	6	A0A0B4KFC7;O97069	30.5544	51.4078	0.750605	0.750605	68.2498	1.6825	0	0.0623705	0.0267302	5	0.31933	A0A0B4KFC7;O97069,O97069	A0A0B4KFC7_DROME;ASSY_DROME,ASSY_DROME	CG1315, isoform B;Argininosuccinate synthase,Argininosuccinate synthase	CG1315	A0A0B4KFC7;O97069,O97069	Drosophila melanogaster	tr;sp,sp		3;2,2	1	uniprot-drosophila_reviewed_unreviewed_0825_2016	>tr|A0A0B4KFC7|A0A0B4KFC7_DROME CG1315, isoform B OS=Drosophila melanogaster GN=CG1315 PE=3 SV=1;>sp|O97069|ASSY_DROME Argininosuccinate synthase OS=Drosophila melanogaster GN=CG1315 PE=2 SV=1,>sp|O97069|ASSY_DROME Argininosuccinate synthase OS=Drosophila melanogaster GN=CG1315 PE=2 SV=1	1	1
TRUE	Contr / Rep	Contr	Rep	36	Q9VL78;X2J5E8	1146.52	948.139	-0.27409	0.27409	-17.3028	0.826972	0	0.0628516	0.0268799	35	0.131238	Q9VL78,Q9VL78;X2J5E8	FKB59_DROME,FKB59_DROME;X2J5E8_DROME	FK506-binding protein 59,FK506-binding protein 59;FK506-binding protein FKBP59, isoform B	FKBP59	Q9VL78,Q9VL78;X2J5E8	Drosophila melanogaster	sp,sp;tr		1,1;4	1	uniprot-drosophila_reviewed_unreviewed_0825_2016	>sp|Q9VL78|FKB59_DROME FK506-binding protein 59 OS=Drosophila melanogaster GN=FKBP59 PE=1 SV=1,>sp|Q9VL78|FKB59_DROME FK506-binding protein 59 OS=Drosophila melanogaster GN=FKBP59 PE=1 SV=1;>tr|X2J5E8|X2J5E8_DROME FK506-binding protein FKBP59, isoform B OS=Drosophila melanogaster GN=FKBP59 PE=4 SV=1	5	6
TRUE	Contr / Rep	Contr	Rep	30	Q4V3F7;Q4V3L7;Q4V403;Q9Y112	5092.32	5143.11	0.0143166	0.0143166	0.997288	1.00997	0	0.0633255	0.027026	29	0.125306	Q4V3F7;Q4V3L7;Q4V403;Q9Y112	Q4V3F7_DROME;Q4V3L7_DROME;Q4V403_DROME;Q9Y112_DROME	IP10437p (Fragment);IP10537p (Fragment);IP10737p (Fragment);BcDNA.GH10614	BcDNA:GH10614;BcDNA:GH10614;BcDNA:GH10614;BcDNA.GH10614	Q4V3F7;Q4V3L7;Q4V403;Q9Y112	Drosophila melanogaster	tr		2;2;2;1	1	uniprot-drosophila_reviewed_unreviewed_0825_2016	>tr|Q4V3F7|Q4V3F7_DROME IP10437p (Fragment) OS=Drosophila melanogaster GN=BcDNA:GH10614 PE=2 SV=1;>tr|Q4V3L7|Q4V3L7_DROME IP10537p (Fragment) OS=Drosophila melanogaster GN=BcDNA:GH10614 PE=2 SV=1;>tr|Q4V403|Q4V403_DROME IP10737p (Fragment) OS=Drosophila melanogaster GN=BcDNA:GH10614 PE=2 SV=1;>tr|Q9Y112|Q9Y112_DROME BcDNA.GH10614 OS=Drosophila melanogaster GN=BcDNA.GH10614 PE=1 SV=1	5	5
TRUE	Contr / Rep	Contr	Rep	6	Q9VZI8	54.018	16.363	-1.72301	1.72301	-69.7083	0.302917	0	0.0645195	0.027478	5	0.829631	Q9VZI8	Q9VZI8_DROME	Fumarylacetoacetase	Faa	Q9VZI8	Drosophila melanogaster	tr		1	2	uniprot-drosophila_reviewed_unreviewed_0825_2016	>tr|Q9VZI8|Q9VZI8_DROME Fumarylacetoacetase OS=Drosophila melanogaster GN=Faa PE=1 SV=2	1	1
TRUE	Contr / Rep	Contr	Rep	36	Q9VM18	17211.9	16254.9	-0.0825357	0.0825357	-5.56037	0.944396	0	0.0653007	0.0277528	35	0.116461	Q9VM18	Q9VM18_DROME	Trehalose 6-phosphate phosphatase	CG5177	Q9VM18	Drosophila melanogaster	tr		1	1	uniprot-drosophila_reviewed_unreviewed_0825_2016	>tr|Q9VM18|Q9VM18_DROME Trehalose 6-phosphate phosphatase OS=Drosophila melanogaster GN=CG5177 PE=1 SV=1	5	6
TRUE	Contr / Rep	Contr	Rep	49	M9PI17;Q9VTK9	19735.9	17182.8	-0.199862	0.199862	-12.9366	0.870634	0	0.0660225	0.0280012	48	0.123298	M9PI17;Q9VTK9	M9PI17_DROME;Q9VTK9_DROME	CG6084, isoform D;CG6084, isoform A	CG6084	M9PI17;Q9VTK9	Drosophila melanogaster	tr		1	1;2	uniprot-drosophila_reviewed_unreviewed_0825_2016	>tr|M9PI17|M9PI17_DROME CG6084, isoform D OS=Drosophila melanogaster GN=CG6084 PE=1 SV=1;>tr|Q9VTK9|Q9VTK9_DROME CG6084, isoform A OS=Drosophila melanogaster GN=CG6084 PE=1 SV=2	8	9
TRUE	Contr / Rep	Contr	Rep	87	Q9VEB1	492838	412393	-0.257093	0.257093	-16.3228	0.836772	0	0.0676276	0.0286017	86	0.0685058	Q9VEB1	Q9VEB1_DROME	IP09655p	Mdh2	Q9VEB1	Drosophila melanogaster	tr		1	1	uniprot-drosophila_reviewed_unreviewed_0825_2016	>tr|Q9VEB1|Q9VEB1_DROME IP09655p OS=Drosophila melanogaster GN=Mdh2 PE=1 SV=1	10	15
TRUE	Contr / Rep	Contr	Rep	6	A0A0B4JD46;Q8T8R1	137.6	177.642	0.368499	0.368499	29.1009	1.29101	0	0.067859	0.0286017	5	0.14839	A0A0B4JD46;Q8T8R1,Q8T8R1	A0A0B4JD46_DROME;Y3800_DROME,Y3800_DROME	CG3800, isoform B;CCHC-type zinc finger protein CG3800,CCHC-type zinc finger protein CG3800	CG3800	A0A0B4JD46;Q8T8R1,Q8T8R1	Drosophila melanogaster	tr;sp,sp		4;1,1	1	uniprot-drosophila_reviewed_unreviewed_0825_2016	>tr|A0A0B4JD46|A0A0B4JD46_DROME CG3800, isoform B OS=Drosophila melanogaster GN=CG3800 PE=4 SV=1;>sp|Q8T8R1|Y3800_DROME CCHC-type zinc finger protein CG3800 OS=Drosophila melanogaster GN=CG3800 PE=1 SV=1,>sp|Q8T8R1|Y3800_DROME CCHC-type zinc finger protein CG3800 OS=Drosophila melanogaster GN=CG3800 PE=1 SV=1	1	1
TRUE	Contr / Rep	Contr	Rep	8	B5RIY3;Q960D3;Q9VBX3	128.192	80.8748	-0.664541	0.664541	-36.9111	0.630889	0	0.0678352	0.0286017	7	0.465569	B5RIY3;Q960D3;Q9VBX3	B5RIY3_DROME;Q960D3_DROME;Q9VBX3_DROME	FI06040p (Fragment);SD06613p;Vig2, isoform B	CG11844-RB;vig2;vig2	B5RIY3;Q960D3;Q9VBX3	Drosophila melanogaster	tr		2;1;1	1;1;2	uniprot-drosophila_reviewed_unreviewed_0825_2016	>tr|B5RIY3|B5RIY3_DROME FI06040p (Fragment) OS=Drosophila melanogaster GN=CG11844-RB PE=2 SV=1;>tr|Q960D3|Q960D3_DROME SD06613p OS=Drosophila melanogaster GN=vig2 PE=1 SV=1;>tr|Q9VBX3|Q9VBX3_DROME Vig2, isoform B OS=Drosophila melanogaster GN=vig2 PE=1 SV=2	1	2
TRUE	Contr / Rep	Contr	Rep	18	Q9VD01	7406.18	6521.86	-0.183447	0.183447	-11.9403	0.880597	0	0.0683712	0.028699	17	0.293731	Q9VD01	Q9VD01_DROME	LP12095p	Pebp1	Q9VD01	Drosophila melanogaster	tr		1	1	uniprot-drosophila_reviewed_unreviewed_0825_2016	>tr|Q9VD01|Q9VD01_DROME LP12095p OS=Drosophila melanogaster GN=Pebp1 PE=1 SV=1	3	3
TRUE	Contr / Rep	Contr	Rep	6	Q7K5M6	33.7875	44.7019	0.403846	0.403846	32.303	1.32303	0	0.0683453	0.028699	5	0.154317	Q7K5M6	Q7K5M6_DROME	GH04176p	Sip1	Q7K5M6	Drosophila melanogaster	tr		1	1	uniprot-drosophila_reviewed_unreviewed_0825_2016	>tr|Q7K5M6|Q7K5M6_DROME GH04176p OS=Drosophila melanogaster GN=Sip1 PE=1 SV=1	1	1
TRUE	Contr / Rep	Contr	Rep	12	Q9VFF0	435.449	300.194	-0.536606	0.536606	-31.0609	0.689391	0	0.0686303	0.0287486	11	0.21732	Q9VFF0	Q9VFF0_DROME	GH01077p	UQCR-C1	Q9VFF0	Drosophila melanogaster	tr		1	2	uniprot-drosophila_reviewed_unreviewed_0825_2016	>tr|Q9VFF0|Q9VFF0_DROME GH01077p OS=Drosophila melanogaster GN=UQCR-C1 PE=1 SV=2	2	2
TRUE	Contr / Rep	Contr	Rep	60	Q8IPE8;Q9V397	3252.77	3377.07	0.0541034	0.0541034	3.82137	1.03821	0	0.0694832	0.0290463	59	0.125903	Q8IPE8;Q9V397	Q8IPE8_DROME;Q9V397_DROME	Mitochondrial trifunctional protein alpha subunit, isoform B;BcDNA.GH12558	Mtpalpha	Q8IPE8;Q9V397	Drosophila melanogaster	tr		1	1	uniprot-drosophila_reviewed_unreviewed_0825_2016	>tr|Q8IPE8|Q8IPE8_DROME Mitochondrial trifunctional protein alpha subunit, isoform B OS=Drosophila melanogaster GN=Mtpalpha PE=1 SV=1;>tr|Q9V397|Q9V397_DROME BcDNA.GH12558 OS=Drosophila melanogaster GN=Mtpalpha PE=1 SV=1	10	10
TRUE	Contr / Rep	Contr	Rep	48	P02572;P10987;X2JCP8	28671.6	25904.8	-0.146405	0.146405	-9.6501	0.903499	0	0.071043	0.0296376	47	0.0616607	P02572,P02572;P10987,P10987;X2JCP8	ACT2_DROME,ACT2_DROME;ACT1_DROME,ACT1_DROME;X2JCP8_DROME	Actin-42A,Actin-42A;Actin-5C,Actin-5C;Actin 5C, isoform E	Act42A,Act42A;Act5C,Act5C;Act5C	P02572,P02572;P10987,P10987;X2JCP8	Drosophila melanogaster	sp,sp;sp,sp;tr		1,1;1,1;3	3,3;4,4;1	uniprot-drosophila_reviewed_unreviewed_0825_2016	>sp|P02572|ACT2_DROME Actin-42A OS=Drosophila melanogaster GN=Act42A PE=1 SV=3,>sp|P02572|ACT2_DROME Actin-42A OS=Drosophila melanogaster GN=Act42A PE=1 SV=3;>sp|P10987|ACT1_DROME Actin-5C OS=Drosophila melanogaster GN=Act5C PE=1 SV=4,>sp|P10987|ACT1_DROME Actin-5C OS=Drosophila melanogaster GN=Act5C PE=1 SV=4;>tr|X2JCP8|X2JCP8_DROME Actin 5C, isoform E OS=Drosophila melanogaster GN=Act5C PE=3 SV…	5	8
TRUE	Contr / Rep	Contr	Rep	18	Q9GU68	1227.97	1435.81	0.225591	0.225591	16.9256	1.16926	0	0.0723146	0.0301065	17	0.140415	Q9GU68	IF5A_DROME	Eukaryotic translation initiation factor 5A	eIF-5A	Q9GU68	Drosophila melanogaster	sp		2	2	uniprot-drosophila_reviewed_unreviewed_0825_2016	>sp|Q9GU68|IF5A_DROME Eukaryotic translation initiation factor 5A OS=Drosophila melanogaster GN=eIF-5A PE=2 SV=2,>sp|Q9GU68|IF5A_DROME Eukaryotic translation initiation factor 5A OS=Drosophila melanogaster GN=eIF-5A PE=2 SV=2	2	3
TRUE	Contr / Rep	Contr	Rep	12	Q8WSN4;Q9VIE7	85.342	67.9466	-0.328854	0.328854	-20.3831	0.796169	0	0.0737799	0.030654	11	0.219678	Q8WSN4;Q9VIE7	Q8WSN4_DROME;Q9VIE7_DROME	GMP synthetase;Burgundy, isoform B	bur	Q8WSN4;Q9VIE7	Drosophila melanogaster	tr		2;1	1;3	uniprot-drosophila_reviewed_unreviewed_0825_2016	>tr|Q8WSN4|Q8WSN4_DROME GMP synthetase OS=Drosophila melanogaster GN=bur PE=2 SV=1;>tr|Q9VIE7|Q9VIE7_DROME Burgundy, isoform B OS=Drosophila melanogaster GN=bur PE=1 SV=3	2	2
TRUE	Contr / Rep	Contr	Rep	78	P17336	40923	41574.8	0.0227979	0.0227979	1.59278	1.01593	0	0.0781228	0.0323924	77	0.0756897	P17336	CATA_DROME	Catalase	Cat	P17336	Drosophila melanogaster	sp		1	2	uniprot-drosophila_reviewed_unreviewed_0825_2016	>sp|P17336|CATA_DROME Catalase OS=Drosophila melanogaster GN=Cat PE=1 SV=2,>sp|P17336|CATA_DROME Catalase OS=Drosophila melanogaster GN=Cat PE=1 SV=2	10	14
TRUE	Contr / Rep	Contr	Rep	24	Q95SP9;Q9VEP6	266.431	212.979	-0.323049	0.323049	-20.0621	0.799379	0	0.0786589	0.0325317	23	0.1532	Q95SP9;Q9VEP6	Q95SP9_DROME;Q9VEP6_DROME	Adenylosuccinate lyase	AdSL	Q95SP9;Q9VEP6	Drosophila melanogaster	tr		2;1	1	uniprot-drosophila_reviewed_unreviewed_0825_2016	>tr|Q95SP9|Q95SP9_DROME Adenylosuccinate lyase OS=Drosophila melanogaster GN=AdSL PE=2 SV=1;>tr|Q9VEP6|Q9VEP6_DROME Adenylosuccinate lyase OS=Drosophila melanogaster GN=AdSL PE=1 SV=1	5	5
TRUE	Contr / Rep	Contr	Rep	12	Q8SXE8;Q9VTY2	775.692	690.584	-0.167668	0.167668	-10.972	0.89028	0	0.0788338	0.0325317	11	0.0760459	Q8SXE8;Q9VTY2	Q8SXE8_DROME;Q9VTY2_DROME	RH46018p;Uncharacterized protein, isoform A	CG10638	Q8SXE8;Q9VTY2	Drosophila melanogaster	tr		2;1	1	uniprot-drosophila_reviewed_unreviewed_0825_2016	>tr|Q8SXE8|Q8SXE8_DROME RH46018p OS=Drosophila melanogaster GN=CG10638 PE=2 SV=1;>tr|Q9VTY2|Q9VTY2_DROME Uncharacterized protein, isoform A OS=Drosophila melanogaster GN=CG10638 PE=1 SV=1	2	2
TRUE	Contr / Rep	Contr	Rep	12	P91938	4371.38	3791.4	-0.205359	0.205359	-13.2677	0.867323	0	0.0789519	0.0325317	11	0.0630268	P91938	TRXR1_DROME	Thioredoxin reductase 1, mitochondrial,Thioredoxin reductase 1, mitochondrial	Trxr-1	P91938	Drosophila melanogaster	sp		1	2	uniprot-drosophila_reviewed_unreviewed_0825_2016	>sp|P91938|TRXR1_DROME Thioredoxin reductase 1, mitochondrial OS=Drosophila melanogaster GN=Trxr-1 PE=1 SV=2,>sp|P91938|TRXR1_DROME Thioredoxin reductase 1, mitochondrial OS=Drosophila melanogaster GN=Trxr-1 PE=1 SV=2	2	2
TRUE	Contr / Rep	Contr	Rep	12	A0A0S0WIH4;B8A423;E1JHJ3;E1JHJ4;E1JHJ5;M9NCU7;M9ND95;M9NEP1;M9NF46;P05661	28.3095	43.1561	0.608282	0.608282	52.4442	1.52444	0	0.0790968	0.0325317	11	0.207714	A0A0S0WIH4;B8A423;E1JHJ3;E1JHJ4;E1JHJ5;M9NCU7;M9ND95;M9NEP1;M9NF46;P05661,P05661	A0A0S0WIH4_DROME;B8A423_DROME;E1JHJ3_DROME;E1JHJ4_DROME;E1JHJ5_DROME;M9NCU7_DROME;M9ND95_DROME;M9NEP1_DROME;M9NF46_DROME;MYSA_DROME,MYSA_DROME	Myosin heavy chain, isoform V;RH59876p;Myosin heavy chain, isoform O;Myosin heavy chain, isoform N;Myosin heavy chain, isoform P;Myosin heavy chain, isoform S;Myosin heavy chain, isoform U;Myosin heavy chain, isoform T;Myosin heavy chain, isoform R;Myosin heavy chain, muscle,Myosin heavy chain, muscle	Mhc;Mhc-RB;Mhc;Mhc;Mhc;Mhc;Mhc;Mhc;Mhc;Mhc,Mhc	A0A0S0WIH4;B8A423;E1JHJ3;E1JHJ4;E1JHJ5;M9NCU7;M9ND95;M9NEP1;M9NF46;P05661,P05661	Drosophila melanogaster	tr;tr;tr;tr;tr;tr;tr;tr;tr;sp,sp		1;2;1;1;1;1;1;1;1;1,1	1;1;1;1;1;1;1;1;1;4,4	uniprot-drosophila_reviewed_unreviewed_0825_2016	>tr|A0A0S0WIH4|A0A0S0WIH4_DROME Myosin heavy chain, isoform V OS=Drosophila melanogaster GN=Mhc PE=1 SV=1;>tr|B8A423|B8A423_DROME RH59876p OS=Drosophila melanogaster GN=Mhc-RB PE=2 SV=1;>tr|E1JHJ3|E1JHJ3_DROME Myosin heavy chain, isoform O OS=Drosophila melanogaster GN=Mhc PE=1 SV=1;>tr|E1JHJ4|E1JHJ4_DROME Myosin heavy chain, isoform N OS=Drosophila melanogaster GN=Mhc PE=1 SV=1;>tr|E1JHJ5|E1JHJ5…	2	2
TRUE	Contr / Rep	Contr	Rep	6	A0A0B4LHE7;Q9XZH6	10.4177	25.5696	1.29539	1.29539	145.444	2.45444	0	0.0793941	0.0325883	5	0.748611	A0A0B4LHE7;Q9XZH6,Q9XZH6	A0A0B4LHE7_DROME;VATG_DROME,VATG_DROME	Vacuolar H[+] ATPase 13kD subunit, isoform B;V-type proton ATPase subunit G,V-type proton ATPase subunit G	Vha13	A0A0B4LHE7;Q9XZH6,Q9XZH6	Drosophila melanogaster	tr;sp,sp		4;3,3	1	uniprot-drosophila_reviewed_unreviewed_0825_2016	>tr|A0A0B4LHE7|A0A0B4LHE7_DROME Vacuolar H[+] ATPase 13kD subunit, isoform B OS=Drosophila melanogaster GN=Vha13 PE=4 SV=1;>sp|Q9XZH6|VATG_DROME V-type proton ATPase subunit G OS=Drosophila melanogaster GN=Vha13 PE=3 SV=1,>sp|Q9XZH6|VATG_DROME V-type proton ATPase subunit G OS=Drosophila melanogaster GN=Vha13 PE=3 SV=1	1	1
TRUE	Contr / Rep	Contr	Rep	6	Q9VLS4	9.39186	15.507	0.723433	0.723433	65.1106	1.65111	0	0.0809277	0.0331511	5	0.298074	Q9VLS4	Q9VLS4_DROME	CG8498, isoform A	CG8498	Q9VLS4	Drosophila melanogaster	tr		1	1	uniprot-drosophila_reviewed_unreviewed_0825_2016	>tr|Q9VLS4|Q9VLS4_DROME CG8498, isoform A OS=Drosophila melanogaster GN=CG8498 PE=1 SV=1	1	1
TRUE	Contr / Rep	Contr	Rep	48	O97477	2276.51	1867.91	-0.285398	0.285398	-17.9485	0.820515	0	0.0837162	0.0341562	47	0.111432	O97477	INO1_DROME	Inositol-3-phosphate synthase	Inos	O97477	Drosophila melanogaster	sp		1	1	uniprot-drosophila_reviewed_unreviewed_0825_2016	>sp|O97477|INO1_DROME Inositol-3-phosphate synthase OS=Drosophila melanogaster GN=Inos PE=1 SV=1,>sp|O97477|INO1_DROME Inositol-3-phosphate synthase OS=Drosophila melanogaster GN=Inos PE=1 SV=1	7	8
TRUE	Contr / Rep	Contr	Rep	6	M9MRQ6;M9MRR7;M9MSK4;Q9NFP5	81.0181	99.162	0.291544	0.291544	22.3949	1.22395	0	0.0836024	0.0341562	5	0.126898	M9MRQ6;M9MRR7;M9MSK4;Q9NFP5,Q9NFP5	M9MRQ6_DROME;M9MRR7_DROME;M9MSK4_DROME;SH3BG_DROME,SH3BG_DROME	Sh3beta, isoform E;Sh3beta, isoform C;Sh3beta, isoform D;SH3 domain-binding glutamic acid-rich protein homolog,SH3 domain-binding glutamic acid-rich protein homolog	Sh3beta	M9MRQ6;M9MRR7;M9MSK4;Q9NFP5,Q9NFP5	Drosophila melanogaster	tr;tr;tr;sp,sp		1;4;4;1,1	1;1;1;2,2	uniprot-drosophila_reviewed_unreviewed_0825_2016	>tr|M9MRQ6|M9MRQ6_DROME Sh3beta, isoform E OS=Drosophila melanogaster GN=Sh3beta PE=1 SV=1;>tr|M9MRR7|M9MRR7_DROME Sh3beta, isoform C OS=Drosophila melanogaster GN=Sh3beta PE=4 SV=1;>tr|M9MSK4|M9MSK4_DROME Sh3beta, isoform D OS=Drosophila melanogaster GN=Sh3beta PE=4 SV=1;>sp|Q9NFP5|SH3BG_DROME SH3 domain-binding glutamic acid-rich protein homolog OS=Drosophila melanogaster GN=Sh3beta PE=1 SV=2,>…	1	1
TRUE	Contr / Rep	Contr	Rep	12	D3DMM4;E6PBY2;E8NH73;E8NH85;E8NH93;O61457;Q86B94;Q86B95;Q86B96;Q86B97;Q9VGE9;Q9VGF0	44.9236	32.5781	-0.463568	0.463568	-27.4809	0.725191	0	0.0840419	0.0342207	11	0.363679	D3DMM4;E6PBY2;E8NH73;E8NH85;E8NH93;O61457;Q86B94;Q86B95;Q86B96;Q86B97;Q9VGE9;Q9VGF0	D3DMM4_DROME;E6PBY2_DROME;E8NH73_DROME;E8NH85_DROME;E8NH93_DROME;O61457_DROME;Q86B94_DROME;Q86B95_DROME;Q86B96_DROME;Q86B97_DROME;Q9VGE9_DROME;Q9VGF0_DROME	MIP15217p;RH69422p;AT15809p (Fragment);AT16455p;AT25649p;Midline fasciclin;FI19380p1;Midline fasciclin, isoform F;Midline fasciclin, isoform E;Midline fasciclin, isoform H;GH11519p;Midline fasciclin, isoform C	mfas;mfas-RO;mfas-RK;mfas-RG;mfas-RJ;mfas;mfas;mfas;mfas;mfas;mfas;mfas	D3DMM4;E6PBY2;E8NH73;E8NH85;E8NH93;O61457;Q86B94;Q86B95;Q86B96;Q86B97;Q9VGE9;Q9VGF0	Drosophila melanogaster	tr		1;2;2;2;2;2;1;1;1;1;1;1	1	uniprot-drosophila_reviewed_unreviewed_0825_2016	>tr|D3DMM4|D3DMM4_DROME MIP15217p OS=Drosophila melanogaster GN=mfas PE=1 SV=1;>tr|E6PBY2|E6PBY2_DROME RH69422p OS=Drosophila melanogaster GN=mfas-RO PE=2 SV=1;>tr|E8NH73|E8NH73_DROME AT15809p (Fragment) OS=Drosophila melanogaster GN=mfas-RK PE=2 SV=1;>tr|E8NH85|E8NH85_DROME AT16455p OS=Drosophila melanogaster GN=mfas-RG PE=2 SV=1;>tr|E8NH93|E8NH93_DROME AT25649p OS=Drosophila melanogaster GN=mfa…	2	2
TRUE	Contr / Rep	Contr	Rep	30	Q7JUX5;Q9VCR2	2176.93	1618.33	-0.427787	0.427787	-25.6599	0.743401	0	0.0843465	0.0342763	29	0.150232	Q7JUX5;Q9VCR2	Q7JUX5_DROME;Q9VCR2_DROME	RE13549p (Fragment);Aminoacylase-1	CG6726	Q7JUX5;Q9VCR2	Drosophila melanogaster	tr		2;1	1;2	uniprot-drosophila_reviewed_unreviewed_0825_2016	>tr|Q7JUX5|Q7JUX5_DROME RE13549p (Fragment) OS=Drosophila melanogaster GN=CG6726 PE=2 SV=1;>tr|Q9VCR2|Q9VCR2_DROME Aminoacylase-1 OS=Drosophila melanogaster GN=CG6726 PE=1 SV=2	5	5
TRUE	Contr / Rep	Contr	Rep	42	C6TP70;D3DMY5;P92177	12732.3	12072.5	-0.076766	0.076766	-5.18192	0.948181	0	0.086545	0.0350998	41	0.139283	C6TP70;D3DMY5;P92177,P92177	C6TP70_DROME;D3DMY5_DROME;1433E_DROME,1433E_DROME	MIP08648p;AT09839p (Fragment);14-3-3 protein epsilon,14-3-3 protein epsilon	14-3-3epsilon-RA;14-3-3epsilon-RD;14-3-3epsilon,14-3-3epsilon	C6TP70;D3DMY5;P92177,P92177	Drosophila melanogaster	tr;tr;sp,sp		2;2;1,1	1;1;2,2	uniprot-drosophila_reviewed_unreviewed_0825_2016	>tr|C6TP70|C6TP70_DROME MIP08648p OS=Drosophila melanogaster GN=14-3-3epsilon-RA PE=2 SV=1;>tr|D3DMY5|D3DMY5_DROME AT09839p (Fragment) OS=Drosophila melanogaster GN=14-3-3epsilon-RD PE=2 SV=1;>sp|P92177|1433E_DROME 14-3-3 protein epsilon OS=Drosophila melanogaster GN=14-3-3epsilon PE=1 SV=2,>sp|P92177|1433E_DROME 14-3-3 protein epsilon OS=Drosophila melanogaster GN=14-3-3epsilon PE=1 SV=2	5	7
TRUE	Contr / Rep	Contr	Rep	138	O62619	144134	121372	-0.247981	0.247981	-15.7926	0.842074	0	0.0878236	0.0355477	137	0.0599823	O62619	KPYK_DROME	Pyruvate kinase	PyK	O62619	Drosophila melanogaster	sp		2	2	uniprot-drosophila_reviewed_unreviewed_0825_2016	>sp|O62619|KPYK_DROME Pyruvate kinase OS=Drosophila melanogaster GN=PyK PE=2 SV=2,>sp|O62619|KPYK_DROME Pyruvate kinase OS=Drosophila melanogaster GN=PyK PE=2 SV=2	19	23
TRUE	Contr / Rep	Contr	Rep	6	Q9W5W8	77.3493	32.0353	-1.27172	1.27172	-58.5836	0.414164	0	0.0910326	0.0367736	5	0.434756	Q9W5W8	Q9W5W8_DROME	CG9577	CG9577	Q9W5W8	Drosophila melanogaster	tr		1	2	uniprot-drosophila_reviewed_unreviewed_0825_2016	>tr|Q9W5W8|Q9W5W8_DROME CG9577 OS=Drosophila melanogaster GN=CG9577 PE=1 SV=2	1	1
TRUE	Contr / Rep	Contr	Rep	12	Q7KST5;Q9VHF0	54.3353	47.6121	-0.190562	0.190562	-12.3736	0.876264	0	0.0915127	0.0368945	11	0.246069	Q7KST5;Q9VHF0	Q7KST5_DROME;Q9VHF0_DROME	CG8129, isoform A;CG8129, isoform B	CG8129	Q7KST5;Q9VHF0	Drosophila melanogaster	tr		1	1	uniprot-drosophila_reviewed_unreviewed_0825_2016	>tr|Q7KST5|Q7KST5_DROME CG8129, isoform A OS=Drosophila melanogaster GN=CG8129 PE=1 SV=1;>tr|Q9VHF0|Q9VHF0_DROME CG8129, isoform B OS=Drosophila melanogaster GN=CG8129 PE=1 SV=1	2	2
TRUE	Contr / Rep	Contr	Rep	6	B4I7U3;Q9W2D9	51.8655	41.9705	-0.3054	0.3054	-19.0782	0.809218	0	0.0917773	0.0369282	5	0.140792	B4I7U3;Q9W2D9,Q9W2D9	EIF3K_DROSE;EIF3K_DROME,EIF3K_DROME	Eukaryotic translation initiation factor 3 subunit K	GM15855;CG10306,CG10306	B4I7U3;Q9W2D9,Q9W2D9	Drosophila sechellia;Drosophila melanogaster,Drosophila melanogaster	sp		3;2,2	1	uniprot-drosophila_reviewed_unreviewed_0825_2016	>sp|B4I7U3|EIF3K_DROSE Eukaryotic translation initiation factor 3 subunit K OS=Drosophila sechellia GN=GM15855 PE=3 SV=1;>sp|Q9W2D9|EIF3K_DROME Eukaryotic translation initiation factor 3 subunit K OS=Drosophila melanogaster GN=CG10306 PE=2 SV=1,>sp|Q9W2D9|EIF3K_DROME Eukaryotic translation initiation factor 3 subunit K OS=Drosophila melanogaster GN=CG10306 PE=2 SV=1	1	1
TRUE	Contr / Rep	Contr	Rep	6	Q9VH96	54.9296	62.2153	0.179685	0.179685	13.2636	1.13264	0	0.0929246	0.0373162	5	0.0992002	Q9VH96	Q9VH96_DROME	CG8358	CG8358	Q9VH96	Drosophila melanogaster	tr		1	1	uniprot-drosophila_reviewed_unreviewed_0825_2016	>tr|Q9VH96|Q9VH96_DROME CG8358 OS=Drosophila melanogaster GN=CG8358 PE=1 SV=1	1	1
TRUE	Contr / Rep	Contr	Rep	6	A1Z6P3;D3DMK3;D6W4V6;Q6NNE2;Q7JZD3;Q9XZ57	131.138	111.374	-0.23567	0.23567	-15.0709	0.849291	0	0.0947223	0.0379634	5	0.106276	A1Z6P3;D3DMK3;D6W4V6;Q6NNE2;Q7JZD3;Q9XZ57	A1Z6P3_DROME;D3DMK3_DROME;D6W4V6_DROME;Q6NNE2_DROME;Q7JZD3_DROME;Q9XZ57_DROME	Eb1, isoform F;MIP15933p (Fragment);MIP19989p;RH07059p;Eb1, isoform A;Eb1, isoform E	Eb1;Eb1-RA;Eb1-RF;Eb1;Eb1;Eb1	A1Z6P3;D3DMK3;D6W4V6;Q6NNE2;Q7JZD3;Q9XZ57	Drosophila melanogaster	tr		1;2;2;2;1;1	2;1;1;1;1;1	uniprot-drosophila_reviewed_unreviewed_0825_2016	>tr|A1Z6P3|A1Z6P3_DROME Eb1, isoform F OS=Drosophila melanogaster GN=Eb1 PE=1 SV=2;>tr|D3DMK3|D3DMK3_DROME MIP15933p (Fragment) OS=Drosophila melanogaster GN=Eb1-RA PE=2 SV=1;>tr|D6W4V6|D6W4V6_DROME MIP19989p OS=Drosophila melanogaster GN=Eb1-RF PE=2 SV=1;>tr|Q6NNE2|Q6NNE2_DROME RH07059p OS=Drosophila melanogaster GN=Eb1 PE=2 SV=1;>tr|Q7JZD3|Q7JZD3_DROME Eb1, isoform A OS=Drosophila melanogaster …	1	1
TRUE	Contr / Rep	Contr	Rep	12	O97121;Q7JXZ2	1809.02	1536.9	-0.235187	0.235187	-15.0425	0.849575	0	0.0968263	0.0387305	11	0.0751852	O97121;Q7JXZ2	O97121_DROME;Q7JXZ2_DROME	Ecdysteroid-inducible polypeptide EIP40;Eip55E, isoform A	Eip55E	O97121;Q7JXZ2	Drosophila melanogaster	tr		3;1	1	uniprot-drosophila_reviewed_unreviewed_0825_2016	>tr|O97121|O97121_DROME Ecdysteroid-inducible polypeptide EIP40 OS=Drosophila melanogaster GN=Eip55E PE=3 SV=1;>tr|Q7JXZ2|Q7JXZ2_DROME Eip55E, isoform A OS=Drosophila melanogaster GN=Eip55E PE=1 SV=1	2	2
TRUE	Contr / Rep	Contr	Rep	24	M9PJN8;P07487	25185.6	29818.2	0.243594	0.243594	18.3939	1.18394	0	0.0972972	0.0388427	23	0.173753	M9PJN8;P07487,P07487	M9PJN8_DROME;G3P2_DROME,G3P2_DROME	Glyceraldehyde-3-phosphate dehydrogenase;Glyceraldehyde-3-phosphate dehydrogenase 2,Glyceraldehyde-3-phosphate dehydrogenase 2	Gapdh2	M9PJN8;P07487,P07487	Drosophila melanogaster	tr;sp,sp		3;1,1	1;2,2	uniprot-drosophila_reviewed_unreviewed_0825_2016	>tr|M9PJN8|M9PJN8_DROME Glyceraldehyde-3-phosphate dehydrogenase OS=Drosophila melanogaster GN=Gapdh2 PE=3 SV=1;>sp|P07487|G3P2_DROME Glyceraldehyde-3-phosphate dehydrogenase 2 OS=Drosophila melanogaster GN=Gapdh2 PE=1 SV=2,>sp|P07487|G3P2_DROME Glyceraldehyde-3-phosphate dehydrogenase 2 OS=Drosophila melanogaster GN=Gapdh2 PE=1 SV=2	2	4
TRUE	Contr / Rep	Contr	Rep	24	D2NUG2;Q9XYZ9	2610.51	3003.01	0.202074	0.202074	15.0351	1.15035	0	0.0980918	0.0390835	23	0.105879	D2NUG2;Q9XYZ9	D2NUG2_DROME;Q9XYZ9_DROME	MIP15314p;Glutathione S transferase E12, isoform A	CG16936-RA;GstE12	D2NUG2;Q9XYZ9	Drosophila melanogaster	tr		2;1	1	uniprot-drosophila_reviewed_unreviewed_0825_2016	>tr|D2NUG2|D2NUG2_DROME MIP15314p OS=Drosophila melanogaster GN=CG16936-RA PE=2 SV=1;>tr|Q9XYZ9|Q9XYZ9_DROME Glutathione S transferase E12, isoform A OS=Drosophila melanogaster GN=GstE12 PE=1 SV=1	4	4
TRUE	Contr / Rep	Contr	Rep	30	C8VUZ1;E8NH92;Q8IRH0;Q8IRH1;Q9W0E4	743.642	646.644	-0.201638	0.201638	-13.0437	0.869563	0	0.0988319	0.0393013	29	0.186328	C8VUZ1;E8NH92;Q8IRH0;Q8IRH1;Q9W0E4	C8VUZ1_DROME;E8NH92_DROME;Q8IRH0_DROME;Q8IRH1_DROME;Q9W0E4_DROME	RE12912p;AT07754p;LP21249p;FI19310p1;Puromycin sensitive aminopeptidase, isoform A	Psa-RA;Psa-RC;Psa;Psa;Psa	C8VUZ1;E8NH92;Q8IRH0;Q8IRH1;Q9W0E4	Drosophila melanogaster	tr		2;2;1;1;1	1	uniprot-drosophila_reviewed_unreviewed_0825_2016	>tr|C8VUZ1|C8VUZ1_DROME RE12912p OS=Drosophila melanogaster GN=Psa-RA PE=2 SV=1;>tr|E8NH92|E8NH92_DROME AT07754p OS=Drosophila melanogaster GN=Psa-RC PE=2 SV=1;>tr|Q8IRH0|Q8IRH0_DROME LP21249p OS=Drosophila melanogaster GN=Psa PE=1 SV=1;>tr|Q8IRH1|Q8IRH1_DROME FI19310p1 OS=Drosophila melanogaster GN=Psa PE=1 SV=1;>tr|Q9W0E4|Q9W0E4_DROME Puromycin sensitive aminopeptidase, isoform A OS=Drosophila …	6	6
TRUE	Contr / Rep	Contr	Rep	18	Q9W330	453.062	483.823	0.0947704	0.0947704	6.78955	1.0679	0	0.0990239	0.0393013	17	0.433897	Q9W330	Q9W330_DROME	Phosphotransferase	Hex-A	Q9W330	Drosophila melanogaster	tr		1	1	uniprot-drosophila_reviewed_unreviewed_0825_2016	>tr|Q9W330|Q9W330_DROME Phosphotransferase OS=Drosophila melanogaster GN=Hex-A PE=1 SV=1	3	3
TRUE	Contr / Rep	Contr	Rep	12	A0APQ0;A0APQ1;A0APQ2;A0APR0;A0APR1;C0MKB3;C0MKB4;C0MKB5;C0MKB6;C0MKC0;Q9VJ31	499.878	544.937	0.124513	0.124513	9.014	1.09014	0	0.104891	0.0414686	11	0.335849	A0APQ0;A0APQ1;A0APQ2;A0APR0;A0APR1;C0MKB3;C0MKB4;C0MKB5;C0MKB6;C0MKC0;Q9VJ31	A0APQ0_DROME;A0APQ1_DROME;A0APQ2_DROME;A0APR0_DROME;A0APR1_DROME;C0MKB3_DROME;C0MKB4_DROME;C0MKB5_DROME;C0MKB6_DROME;C0MKC0_DROME;Q9VJ31_DROME	CG10623 protein;CG10623 protein;CG10623 protein;CG10623 protein;CG10623 protein;CG10623-PA;CG10623-PA;CG10623-PA;CG10623-PA;CG10623-PA;CG10623 protein	CG10623	A0APQ0;A0APQ1;A0APQ2;A0APR0;A0APR1;C0MKB3;C0MKB4;C0MKB5;C0MKB6;C0MKC0;Q9VJ31	Drosophila melanogaster	tr		4;4;4;4;4;4;4;4;4;4;1	1	uniprot-drosophila_reviewed_unreviewed_0825_2016	>tr|A0APQ0|A0APQ0_DROME CG10623 protein OS=Drosophila melanogaster GN=CG10623 PE=4 SV=1;>tr|A0APQ1|A0APQ1_DROME CG10623 protein OS=Drosophila melanogaster GN=CG10623 PE=4 SV=1;>tr|A0APQ2|A0APQ2_DROME CG10623 protein OS=Drosophila melanogaster GN=CG10623 PE=4 SV=1;>tr|A0APR0|A0APR0_DROME CG10623 protein OS=Drosophila melanogaster GN=CG10623 PE=4 SV=1;>tr|A0APR1|A0APR1_DROME CG10623 protein OS=Dros…	2	2
TRUE	Contr / Rep	Contr	Rep	18	B7YZI0;Q9V7N5	726.609	704.826	-0.043913	0.043913	-2.99796	0.97002	0	0.104725	0.0414686	17	0.184135	B7YZI0;Q9V7N5,Q9V7N5	B7YZI0_DROME;VATC_DROME,VATC_DROME	Vacuolar H[+] ATPase 44kD subunit, isoform F;V-type proton ATPase subunit C,V-type proton ATPase subunit C	Vha44	B7YZI0;Q9V7N5,Q9V7N5	Drosophila melanogaster	tr;sp,sp		1;2,2	1;5,5	uniprot-drosophila_reviewed_unreviewed_0825_2016	>tr|B7YZI0|B7YZI0_DROME Vacuolar H[+] ATPase 44kD subunit, isoform F OS=Drosophila melanogaster GN=Vha44 PE=1 SV=1;>sp|Q9V7N5|VATC_DROME V-type proton ATPase subunit C OS=Drosophila melanogaster GN=Vha44 PE=2 SV=5,>sp|Q9V7N5|VATC_DROME V-type proton ATPase subunit C OS=Drosophila melanogaster GN=Vha44 PE=2 SV=5	3	3
TRUE	Contr / Rep	Contr	Rep	12	E3CTU3;Q86P15;Q9VS84	142.129	104.987	-0.436984	0.436984	-26.1323	0.738677	0	0.106162	0.0418897	11	0.389585	E3CTU3;Q86P15;Q9VS84	E3CTU3_DROME;Q86P15_DROME;Q9VS84_DROME	RT10325p (Fragment);RE09158p;FI03225p	CG32372-RA;ltl;ltl	E3CTU3;Q86P15;Q9VS84	Drosophila melanogaster	tr		2;2;1	1;1;2	uniprot-drosophila_reviewed_unreviewed_0825_2016	>tr|E3CTU3|E3CTU3_DROME RT10325p (Fragment) OS=Drosophila melanogaster GN=CG32372-RA PE=2 SV=1;>tr|Q86P15|Q86P15_DROME RE09158p OS=Drosophila melanogaster GN=ltl PE=2 SV=1;>tr|Q9VS84|Q9VS84_DROME FI03225p OS=Drosophila melanogaster GN=ltl PE=1 SV=2	2	2
TRUE	Contr / Rep	Contr	Rep	6	Q9VNE9	889.375	696.075	-0.353548	0.353548	-21.7343	0.782657	0	0.106817	0.042067	5	0.141488	Q9VNE9	RL13A_DROME	60S ribosomal protein L13a	RpL13A	Q9VNE9	Drosophila melanogaster	sp		1	1	uniprot-drosophila_reviewed_unreviewed_0825_2016	>sp|Q9VNE9|RL13A_DROME 60S ribosomal protein L13a OS=Drosophila melanogaster GN=RpL13A PE=1 SV=1,>sp|Q9VNE9|RL13A_DROME 60S ribosomal protein L13a OS=Drosophila melanogaster GN=RpL13A PE=1 SV=1	1	1
TRUE	Contr / Rep	Contr	Rep	50	P35381	17496.7	11559.1	-0.598062	0.598062	-33.9359	0.660641	0	0.107268	0.042128	49	0.153083	P35381	ATPA_DROME	ATP synthase subunit alpha, mitochondrial,ATP synthase subunit alpha, mitochondrial	blw	P35381	Drosophila melanogaster	sp		1	2	uniprot-drosophila_reviewed_unreviewed_0825_2016	>sp|P35381|ATPA_DROME ATP synthase subunit alpha, mitochondrial OS=Drosophila melanogaster GN=blw PE=1 SV=2,>sp|P35381|ATPA_DROME ATP synthase subunit alpha, mitochondrial OS=Drosophila melanogaster GN=blw PE=1 SV=2	7	9
TRUE	Contr / Rep	Contr	Rep	12	Q8T0Q4	262.156	265.546	0.018539	0.018539	1.29332	1.01293	0	0.107385	0.042128	11	0.174146	Q8T0Q4	Q8T0Q4_DROME	GH13992p	shrb	Q8T0Q4	Drosophila melanogaster	tr		1	1	uniprot-drosophila_reviewed_unreviewed_0825_2016	>tr|Q8T0Q4|Q8T0Q4_DROME GH13992p OS=Drosophila melanogaster GN=shrb PE=1 SV=1	2	2
TRUE	Contr / Rep	Contr	Rep	6	Q9V7D2	128.681	105.877	-0.281412	0.281412	-17.7215	0.822785	0	0.109775	0.0429829	5	0.145228	Q9V7D2	VATD1_DROME	V-type proton ATPase subunit D 1	Vha36-1	Q9V7D2	Drosophila melanogaster	sp		2	1	uniprot-drosophila_reviewed_unreviewed_0825_2016	>sp|Q9V7D2|VATD1_DROME V-type proton ATPase subunit D 1 OS=Drosophila melanogaster GN=Vha36-1 PE=2 SV=1,>sp|Q9V7D2|VATD1_DROME V-type proton ATPase subunit D 1 OS=Drosophila melanogaster GN=Vha36-1 PE=2 SV=1	1	1
TRUE	Contr / Rep	Contr	Rep	6	A1ZAW7;C6SUV8;Q5U0T0;Q8SXT0;Q9VMI3	67.3747	55.1313	-0.289336	0.289336	-18.1721	0.818279	0	0.1102	0.0430666	5	0.146136	A1ZAW7;C6SUV8;Q5U0T0;Q8SXT0;Q9VMI3	A1ZAW7_DROME;C6SUV8_DROME;Q5U0T0_DROME;Q8SXT0_DROME;Q9VMI3_DROME	NADH dehydrogenase (Ubiquinone) 51 kDa subunit-like 1;MIP04331p (Fragment);AT08270p;RE33648p;GM14163p	ND-51L1;CG11423-RA;ND-51L1;ND-51;ND-51	A1ZAW7;C6SUV8;Q5U0T0;Q8SXT0;Q9VMI3	Drosophila melanogaster	tr		4;2;2;2;1	1	uniprot-drosophila_reviewed_unreviewed_0825_2016	>tr|A1ZAW7|A1ZAW7_DROME NADH dehydrogenase (Ubiquinone) 51 kDa subunit-like 1 OS=Drosophila melanogaster GN=ND-51L1 PE=4 SV=1;>tr|C6SUV8|C6SUV8_DROME MIP04331p (Fragment) OS=Drosophila melanogaster GN=CG11423-RA PE=2 SV=1;>tr|Q5U0T0|Q5U0T0_DROME AT08270p OS=Drosophila melanogaster GN=ND-51L1 PE=2 SV=1;>tr|Q8SXT0|Q8SXT0_DROME RE33648p OS=Drosophila melanogaster GN=ND-51 PE=2 SV=1;>tr|Q9VMI3|Q9VMI3…	1	1
TRUE	Contr / Rep	Contr	Rep	39	P14318	10322.9	9213.1	-0.164084	0.164084	-10.7505	0.892495	0	0.114428	0.0446334	38	0.116756	P14318	MP20_DROME	Muscle-specific protein 20	Mp20	P14318	Drosophila melanogaster	sp		2	2	uniprot-drosophila_reviewed_unreviewed_0825_2016	>sp|P14318|MP20_DROME Muscle-specific protein 20 OS=Drosophila melanogaster GN=Mp20 PE=2 SV=2,>sp|P14318|MP20_DROME Muscle-specific protein 20 OS=Drosophila melanogaster GN=Mp20 PE=2 SV=2	5	7
TRUE	Contr / Rep	Contr	Rep	6	P12426;X2J8L3	40.7453	52.3004	0.360187	0.360187	28.3593	1.28359	0	0.115281	0.0448805	5	0.151882	P12426,P12426;X2J8L3	APT_DROME,APT_DROME;X2J8L3_DROME	Adenine phosphoribosyltransferase,Adenine phosphoribosyltransferase;Adenine phosphoribosyltransferase, isoform C	Aprt	P12426,P12426;X2J8L3	Drosophila melanogaster	sp,sp;tr		2,2;3	3,3;1	uniprot-drosophila_reviewed_unreviewed_0825_2016	>sp|P12426|APT_DROME Adenine phosphoribosyltransferase OS=Drosophila melanogaster GN=Aprt PE=2 SV=3,>sp|P12426|APT_DROME Adenine phosphoribosyltransferase OS=Drosophila melanogaster GN=Aprt PE=2 SV=3;>tr|X2J8L3|X2J8L3_DROME Adenine phosphoribosyltransferase, isoform C OS=Drosophila melanogaster GN=Aprt PE=3 SV=1	1	1
TRUE	Contr / Rep	Contr	Rep	42	A0A0B4LGS4;P54611	3412.3	2831.44	-0.26921	0.26921	-17.0226	0.829774	0	0.115912	0.0450403	41	0.121339	A0A0B4LGS4;P54611,P54611	A0A0B4LGS4_DROME;VATE_DROME,VATE_DROME	Vacuolar H[+]-ATPase 26kD subunit, isoform C;V-type proton ATPase subunit E,V-type proton ATPase subunit E	Vha26	A0A0B4LGS4;P54611,P54611	Drosophila melanogaster	tr;sp,sp		3;2,2	1	uniprot-drosophila_reviewed_unreviewed_0825_2016	>tr|A0A0B4LGS4|A0A0B4LGS4_DROME Vacuolar H[+]-ATPase 26kD subunit, isoform C OS=Drosophila melanogaster GN=Vha26 PE=3 SV=1;>sp|P54611|VATE_DROME V-type proton ATPase subunit E OS=Drosophila melanogaster GN=Vha26 PE=2 SV=1,>sp|P54611|VATE_DROME V-type proton ATPase subunit E OS=Drosophila melanogaster GN=Vha26 PE=2 SV=1	7	8
TRUE	Contr / Rep	Contr	Rep	24	A0A0B4JCU8;E4NKM4;Q9V8M5	6140.1	6159.21	0.0044837	0.0044837	0.31127	1.00311	0	0.118484	0.0459521	23	0.204339	A0A0B4JCU8;E4NKM4;Q9V8M5,Q9V8M5	A0A0B4JCU8_DROME;E4NKM4_DROME;3HIDH_DROME,3HIDH_DROME	3-hydroxyisobutyrate dehydrogenase;RH73972p;Probable 3-hydroxyisobutyrate dehydrogenase, mitochondrial,Probable 3-hydroxyisobutyrate dehydrogenase, mitochondrial	CG15093;CG15093-RB;CG15093,CG15093	A0A0B4JCU8;E4NKM4;Q9V8M5,Q9V8M5	Drosophila melanogaster	tr;tr;sp,sp		1;2;2,2	1;1;2,2	uniprot-drosophila_reviewed_unreviewed_0825_2016	>tr|A0A0B4JCU8|A0A0B4JCU8_DROME 3-hydroxyisobutyrate dehydrogenase OS=Drosophila melanogaster GN=CG15093 PE=1 SV=1;>tr|E4NKM4|E4NKM4_DROME RH73972p OS=Drosophila melanogaster GN=CG15093-RB PE=2 SV=1;>sp|Q9V8M5|3HIDH_DROME Probable 3-hydroxyisobutyrate dehydrogenase, mitochondrial OS=Drosophila melanogaster GN=CG15093 PE=2 SV=2,>sp|Q9V8M5|3HIDH_DROME Probable 3-hydroxyisobutyrate dehydrogenase, mi…	4	4
TRUE	Contr / Rep	Contr	Rep	6	P50245;Q6NR07;Q7KSG0;Q9VZX9	12.8846	8.44645	-0.609226	0.609226	-34.4452	0.655548	0	0.118916	0.0460321	5	0.296007	P50245,P50245;Q6NR07;Q7KSG0;Q9VZX9	SAHH2_DROME,SAHH2_DROME;Q6NR07_DROME;Q7KSG0_DROME;Q9VZX9_DROME	Putative adenosylhomocysteinase 2,Putative adenosylhomocysteinase 2;Adenosylhomocysteinase;Adenosylhomocysteinase;Adenosylhomocysteinase	Ahcy89E,Ahcy89E;CG9977;Ahcy89E;CG9977-RA	P50245,P50245;Q6NR07;Q7KSG0;Q9VZX9	Drosophila melanogaster	sp,sp;tr;tr;tr		2,2;2;3;1	2,2;1;1;1	uniprot-drosophila_reviewed_unreviewed_0825_2016	>sp|P50245|SAHH2_DROME Putative adenosylhomocysteinase 2 OS=Drosophila melanogaster GN=Ahcy89E PE=2 SV=2,>sp|P50245|SAHH2_DROME Putative adenosylhomocysteinase 2 OS=Drosophila melanogaster GN=Ahcy89E PE=2 SV=2;>tr|Q6NR07|Q6NR07_DROME Adenosylhomocysteinase OS=Drosophila melanogaster GN=CG9977 PE=2 SV=1;>tr|Q7KSG0|Q7KSG0_DROME Adenosylhomocysteinase OS=Drosophila melanogaster GN=Ahcy89E PE=3 SV=1;…	1	1
TRUE	Contr / Rep	Contr	Rep	18	Q86BM5;Q9VLL3	31.7617	23.0415	-0.463054	0.463054	-27.4551	0.725449	0	0.120647	0.0466135	17	0.235341	Q86BM5;Q9VLL3	Q86BM5_DROME;Q9VLL3_DROME	A kinase anchor protein 200, isoform D;A kinase anchor protein 200, isoform A	Akap200	Q86BM5;Q9VLL3	Drosophila melanogaster	tr		1	1;3	uniprot-drosophila_reviewed_unreviewed_0825_2016	>tr|Q86BM5|Q86BM5_DROME A kinase anchor protein 200, isoform D OS=Drosophila melanogaster GN=Akap200 PE=1 SV=1;>tr|Q9VLL3|Q9VLL3_DROME A kinase anchor protein 200, isoform A OS=Drosophila melanogaster GN=Akap200 PE=1 SV=3	3	3
TRUE	Contr / Rep	Contr	Rep	6	A4V3Q6;P05303	121.656	92.9385	-0.388462	0.388462	-23.6056	0.763944	0	0.121233	0.0467517	5	0.209392	A4V3Q6;P05303,P05303	A4V3Q6_DROME;EF1A2_DROME,EF1A2_DROME	Elongation factor 1-alpha;Elongation factor 1-alpha 2,Elongation factor 1-alpha 2	Ef1alpha100E	A4V3Q6;P05303,P05303	Drosophila melanogaster	tr;sp,sp		1;2,2	1;2,2	uniprot-drosophila_reviewed_unreviewed_0825_2016	>tr|A4V3Q6|A4V3Q6_DROME Elongation factor 1-alpha OS=Drosophila melanogaster GN=Ef1alpha100E PE=1 SV=1;>sp|P05303|EF1A2_DROME Elongation factor 1-alpha 2 OS=Drosophila melanogaster GN=Ef1alpha100E PE=2 SV=2,>sp|P05303|EF1A2_DROME Elongation factor 1-alpha 2 OS=Drosophila melanogaster GN=Ef1alpha100E PE=2 SV=2	1	1
TRUE	Contr / Rep	Contr	Rep	54	Q9VKI8	18593.5	16443.8	-0.177252	0.177252	-11.5614	0.884386	0	0.121745	0.0467723	53	0.119275	Q9VKI8	Q9VKI8_DROME	CG6287	CG6287	Q9VKI8	Drosophila melanogaster	tr		1	1	uniprot-drosophila_reviewed_unreviewed_0825_2016	>tr|Q9VKI8|Q9VKI8_DROME CG6287 OS=Drosophila melanogaster GN=CG6287 PE=1 SV=1	9	10
TRUE	Contr / Rep	Contr	Rep	18	A0A0B4KF06;Q0E993;Q960E6;T2GFI6	1586.79	1114.99	-0.509074	0.509074	-29.7327	0.702673	0	0.121564	0.0467723	17	0.105138	A0A0B4KF06;Q0E993;Q960E6;T2GFI6	A0A0B4KF06_DROME;Q0E993_DROME;Q960E6_DROME;T2GFI6_DROME	Valyl-tRNA synthetase, isoform C;Valyl-tRNA synthetase, isoform A;SD04748p;FI22042p1	ValRS;ValRS;ValRS;Aats-val-RA	A0A0B4KF06;Q0E993;Q960E6;T2GFI6	Drosophila melanogaster	tr		1;1;2;2	1	uniprot-drosophila_reviewed_unreviewed_0825_2016	>tr|A0A0B4KF06|A0A0B4KF06_DROME Valyl-tRNA synthetase, isoform C OS=Drosophila melanogaster GN=ValRS PE=1 SV=1;>tr|Q0E993|Q0E993_DROME Valyl-tRNA synthetase, isoform A OS=Drosophila melanogaster GN=ValRS PE=1 SV=1;>tr|Q960E6|Q960E6_DROME SD04748p OS=Drosophila melanogaster GN=ValRS PE=2 SV=1;>tr|T2GFI6|T2GFI6_DROME FI22042p1 OS=Drosophila melanogaster GN=Aats-val-RA PE=2 SV=1	3	3
TRUE	Contr / Rep	Contr	Rep	24	B4I2A8;B4PAR6;B4QBH8;Q9U915	10824.8	9848.51	-0.136363	0.136363	-9.01898	0.90981	0	0.122477	0.0468709	23	0.183358	B4I2A8;B4PAR6;B4QBH8;Q9U915,Q9U915	KAD2_DROSE;KAD2_DROYA;KAD2_DROSI;KAD2_DROME,KAD2_DROME	Adenylate kinase	Adk2-1;Adk2;Adk2;Adk2,Adk2	B4I2A8;B4PAR6;B4QBH8;Q9U915,Q9U915	Drosophila sechellia;Drosophila yakuba;Drosophila simulans;Drosophila melanogaster,Drosophila melanogaster	sp		3;3;3;1,1	1	uniprot-drosophila_reviewed_unreviewed_0825_2016	>sp|B4I2A8|KAD2_DROSE Adenylate kinase OS=Drosophila sechellia GN=Adk2-1 PE=3 SV=1;>sp|B4PAR6|KAD2_DROYA Adenylate kinase OS=Drosophila yakuba GN=Adk2 PE=3 SV=1;>sp|B4QBH8|KAD2_DROSI Adenylate kinase OS=Drosophila simulans GN=Adk2 PE=3 SV=1;>sp|Q9U915|KAD2_DROME Adenylate kinase OS=Drosophila melanogaster GN=Adk2 PE=1 SV=1,>sp|Q9U915|KAD2_DROME Adenylate kinase OS=Drosophila melanogaster GN=Adk2 …	5	5
TRUE	Contr / Rep	Contr	Rep	18	Q7JQR3	87.9081	148.564	0.757013	0.757013	68.9988	1.68999	0	0.122471	0.0468709	17	0.187311	Q7JQR3	Q7JQR3_DROME	Sulfhydryl oxidase	CG4670	Q7JQR3	Drosophila melanogaster	tr		1	1	uniprot-drosophila_reviewed_unreviewed_0825_2016	>tr|Q7JQR3|Q7JQR3_DROME Sulfhydryl oxidase OS=Drosophila melanogaster GN=CG4670 PE=1 SV=1	3	3
TRUE	Contr / Rep	Contr	Rep	6	Q9VIM5;X2JAI2	39.9254	29.9691	-0.413833	0.413833	-24.9374	0.750626	0	0.122691	0.0468709	5	0.220269	Q9VIM5,Q9VIM5;X2JAI2	ARPC2_DROME,ARPC2_DROME;X2JAI2_DROME	Actin-related protein 2/3 complex subunit 2,Actin-related protein 2/3 complex subunit 2;Actin-related protein 2/3 complex, subunit 2, isoform B	Arpc2	Q9VIM5,Q9VIM5;X2JAI2	Drosophila melanogaster	sp,sp;tr		2,2;4	2,2;1	uniprot-drosophila_reviewed_unreviewed_0825_2016	>sp|Q9VIM5|ARPC2_DROME Actin-related protein 2/3 complex subunit 2 OS=Drosophila melanogaster GN=Arpc2 PE=2 SV=2,>sp|Q9VIM5|ARPC2_DROME Actin-related protein 2/3 complex subunit 2 OS=Drosophila melanogaster GN=Arpc2 PE=2 SV=2;>tr|X2JAI2|X2JAI2_DROME Actin-related protein 2/3 complex, subunit 2, isoform B OS=Drosophila melanogaster GN=Arpc2 PE=4 SV=1	1	1
TRUE	Contr / Rep	Contr	Rep	24	Q9V434	609.804	413.856	-0.559218	0.559218	-32.133	0.67867	0	0.123857	0.0472277	23	0.211654	Q9V434	Q9V434_DROME	Asparaginyl-tRNA synthetase, isoform A	AsnRS	Q9V434	Drosophila melanogaster	tr		1	1	uniprot-drosophila_reviewed_unreviewed_0825_2016	>tr|Q9V434|Q9V434_DROME Asparaginyl-tRNA synthetase, isoform A OS=Drosophila melanogaster GN=AsnRS PE=1 SV=1	3	4
TRUE	Contr / Rep	Contr	Rep	6	Q7JWF1	10.0778	13.5898	0.431346	0.431346	34.8491	1.34849	0	0.124606	0.0474247	5	0.252713	Q7JWF1	Q7JWF1_DROME	Electron transfer flavoprotein-ubiquinone oxidoreductase, mitochondrial	Etf-QO	Q7JWF1	Drosophila melanogaster	tr		1	1	uniprot-drosophila_reviewed_unreviewed_0825_2016	>tr|Q7JWF1|Q7JWF1_DROME Electron transfer flavoprotein-ubiquinone oxidoreductase, mitochondrial OS=Drosophila melanogaster GN=Etf-QO PE=1 SV=1	1	1
TRUE	Contr / Rep	Contr	Rep	12	Q7K485	685.737	637.288	-0.10571	0.10571	-7.06525	0.929348	0	0.128465	0.0488023	11	0.128999	Q7K485	Q7K485_DROME	CathD	cathD	Q7K485	Drosophila melanogaster	tr		1	1	uniprot-drosophila_reviewed_unreviewed_0825_2016	>tr|Q7K485|Q7K485_DROME CathD OS=Drosophila melanogaster GN=cathD PE=1 SV=1	2	2
TRUE	Contr / Rep	Contr	Rep	12	C0PDF4;C0PV64;M9PEW1;Q9I7R0	308.51	356.419	0.208253	0.208253	15.5289	1.15529	0	0.132872	0.0503827	11	0.344085	C0PDF4;C0PV64;M9PEW1;Q9I7R0	C0PDF4_DROME;C0PV64_DROME;M9PEW1_DROME;Q9I7R0_DROME	MIP06482p;MIP07547p;Uncharacterized protein, isoform E;GH04560p	CG18815-RA;CG18815-RA;CG18815;CG18815	C0PDF4;C0PV64;M9PEW1;Q9I7R0	Drosophila melanogaster	tr		1;2;1;1	1	uniprot-drosophila_reviewed_unreviewed_0825_2016	>tr|C0PDF4|C0PDF4_DROME MIP06482p OS=Drosophila melanogaster GN=CG18815-RA PE=1 SV=1;>tr|C0PV64|C0PV64_DROME MIP07547p OS=Drosophila melanogaster GN=CG18815-RA PE=2 SV=1;>tr|M9PEW1|M9PEW1_DROME Uncharacterized protein, isoform E OS=Drosophila melanogaster GN=CG18815 PE=1 SV=1;>tr|Q9I7R0|Q9I7R0_DROME GH04560p OS=Drosophila melanogaster GN=CG18815 PE=1 SV=1	2	2
TRUE	Contr / Rep	Contr	Rep	6	D2NUJ5;M9PDU4;Q94519	812.129	914.52	0.171306	0.171306	12.6077	1.12608	0	0.134412	0.0507778	5	0.0817479	D2NUJ5;M9PDU4;Q94519,Q94519	D2NUJ5_DROME;M9PDU4_DROME;ACPM_DROME,ACPM_DROME	Acyl carrier protein (Fragment);Acyl carrier protein;Acyl carrier protein, mitochondrial,Acyl carrier protein, mitochondrial	mtacp1-RA;ND-ACP;ND-ACP,ND-ACP	D2NUJ5;M9PDU4;Q94519,Q94519	Drosophila melanogaster	tr;tr;sp,sp		2;1;2,2	1	uniprot-drosophila_reviewed_unreviewed_0825_2016	>tr|D2NUJ5|D2NUJ5_DROME Acyl carrier protein (Fragment) OS=Drosophila melanogaster GN=mtacp1-RA PE=2 SV=1;>tr|M9PDU4|M9PDU4_DROME Acyl carrier protein OS=Drosophila melanogaster GN=ND-ACP PE=1 SV=1;>sp|Q94519|ACPM_DROME Acyl carrier protein, mitochondrial OS=Drosophila melanogaster GN=ND-ACP PE=2 SV=1,>sp|Q94519|ACPM_DROME Acyl carrier protein, mitochondrial OS=Drosophila melanogaster GN=ND-ACP P…	1	1
TRUE	Contr / Rep	Contr	Rep	6	O61613	10.8771	8.1458	-0.417165	0.417165	-25.1105	0.748895	0	0.134202	0.0507778	5	0.204585	O61613	NMT_DROME	Glycylpeptide N-tetradecanoyltransferase	Nmt	O61613	Drosophila melanogaster	sp		2	2	uniprot-drosophila_reviewed_unreviewed_0825_2016	>sp|O61613|NMT_DROME Glycylpeptide N-tetradecanoyltransferase OS=Drosophila melanogaster GN=Nmt PE=2 SV=2,>sp|O61613|NMT_DROME Glycylpeptide N-tetradecanoyltransferase OS=Drosophila melanogaster GN=Nmt PE=2 SV=2	1	1
TRUE	Contr / Rep	Contr	Rep	12	A0A165Q6N5;A4UZR3;A5XCQ1;A5XCQ4;A5XCQ7;A5XCQ9;Q9W2M2	45.7131	33.0181	-0.46935	0.46935	-27.771	0.72229	0	0.135965	0.0512697	11	0.192105	A0A165Q6N5;A4UZR3;A5XCQ1;A5XCQ4;A5XCQ7;A5XCQ9;Q9W2M2,Q9W2M2	A0A165Q6N5_DROME;A4UZR3_DROME;A5XCQ1_DROME;A5XCQ4_DROME;A5XCQ7_DROME;A5XCQ9_DROME;TREA_DROME,TREA_DROME	Trehalase (Fragment);Trehalase;Trehalase (Fragment);Trehalase (Fragment);Trehalase (Fragment);Trehalase (Fragment);Trehalase,Trehalase	;Treh;Treh;Treh;Treh;Treh;Treh,Treh	A0A165Q6N5;A4UZR3;A5XCQ1;A5XCQ4;A5XCQ7;A5XCQ9;Q9W2M2,Q9W2M2	Drosophila melanogaster	tr;tr;tr;tr;tr;tr;sp,sp		2;1;2;3;3;3;1,1	1	uniprot-drosophila_reviewed_unreviewed_0825_2016	>tr|A0A165Q6N5|A0A165Q6N5_DROME Trehalase (Fragment) OS=Drosophila melanogaster PE=2 SV=1;>tr|A4UZR3|A4UZR3_DROME Trehalase OS=Drosophila melanogaster GN=Treh PE=1 SV=1;>tr|A5XCQ1|A5XCQ1_DROME Trehalase (Fragment) OS=Drosophila melanogaster GN=Treh PE=2 SV=1;>tr|A5XCQ4|A5XCQ4_DROME Trehalase (Fragment) OS=Drosophila melanogaster GN=Treh PE=3 SV=1;>tr|A5XCQ7|A5XCQ7_DROME Trehalase (Fragment) OS=Dr…	2	2
TRUE	Contr / Rep	Contr	Rep	78	C7LA94;O02649	8318.33	6108.35	-0.44551	0.44551	-26.5675	0.734325	0	0.139576	0.0524374	77	0.0801832	C7LA94;O02649,O02649	C7LA94_DROME;CH60_DROME,CH60_DROME	FI05241p;60 kDa heat shock protein, mitochondrial,60 kDa heat shock protein, mitochondrial	;Hsp60,Hsp60	C7LA94;O02649,O02649	Drosophila melanogaster	tr;sp,sp		2;1,1	1;3,3	uniprot-drosophila_reviewed_unreviewed_0825_2016	>tr|C7LA94|C7LA94_DROME FI05241p OS=Drosophila melanogaster PE=2 SV=1;>sp|O02649|CH60_DROME 60 kDa heat shock protein, mitochondrial OS=Drosophila melanogaster GN=Hsp60 PE=1 SV=3,>sp|O02649|CH60_DROME 60 kDa heat shock protein, mitochondrial OS=Drosophila melanogaster GN=Hsp60 PE=1 SV=3	12	13
TRUE	Contr / Rep	Contr	Rep	18	Q9VFQ9	125.027	150.232	0.264951	0.264951	20.1595	1.2016	0	0.139564	0.0524374	17	0.275838	Q9VFQ9	Q9VFQ9_DROME	Dipeptidase B, isoform A	Dip-B	Q9VFQ9	Drosophila melanogaster	tr		1	2	uniprot-drosophila_reviewed_unreviewed_0825_2016	>tr|Q9VFQ9|Q9VFQ9_DROME Dipeptidase B, isoform A OS=Drosophila melanogaster GN=Dip-B PE=1 SV=2	3	3
TRUE	Contr / Rep	Contr	Rep	12	B3DMP7;Q9W1G0	3029.69	4670.57	0.624427	0.624427	54.1598	1.5416	0	0.140158	0.0525591	11	0.268133	B3DMP7;Q9W1G0,Q9W1G0	B3DMP7_DROME;TALDO_DROME,TALDO_DROME	Transaldolase;Probable transaldolase,Probable transaldolase	CG2827-RA;Taldo,Taldo	B3DMP7;Q9W1G0,Q9W1G0	Drosophila melanogaster	tr;sp,sp		2	1;2,2	uniprot-drosophila_reviewed_unreviewed_0825_2016	>tr|B3DMP7|B3DMP7_DROME Transaldolase OS=Drosophila melanogaster GN=CG2827-RA PE=2 SV=1;>sp|Q9W1G0|TALDO_DROME Probable transaldolase OS=Drosophila melanogaster GN=Taldo PE=2 SV=2,>sp|Q9W1G0|TALDO_DROME Probable transaldolase OS=Drosophila melanogaster GN=Taldo PE=2 SV=2	2	2
TRUE	Contr / Rep	Contr	Rep	54	Q7KSU6;Q9VHN7	11479.5	14259.6	0.312879	0.312879	24.2184	1.24218	0	0.141103	0.0528167	53	0.193416	Q7KSU6;Q9VHN7	Q7KSU6_DROME;Q9VHN7_DROME	CG8036, isoform D;CG8036, isoform B	CG8036	Q7KSU6;Q9VHN7	Drosophila melanogaster	tr		1	1;3	uniprot-drosophila_reviewed_unreviewed_0825_2016	>tr|Q7KSU6|Q7KSU6_DROME CG8036, isoform D OS=Drosophila melanogaster GN=CG8036 PE=1 SV=1;>tr|Q9VHN7|Q9VHN7_DROME CG8036, isoform B OS=Drosophila melanogaster GN=CG8036 PE=1 SV=3	8	9
TRUE	Contr / Rep	Contr	Rep	6	Q8SY98;Q9VJY6;X2JE06	213.894	266.054	0.314823	0.314823	24.3859	1.24386	0	0.141703	0.0529439	5	0.261522	Q8SY98;Q9VJY6,Q9VJY6;X2JE06	Q8SY98_DROME;RL24_DROME,RL24_DROME;X2JE06_DROME	RH14088p;60S ribosomal protein L24,60S ribosomal protein L24;Ribosomal protein L24, isoform B	RpL24	Q8SY98;Q9VJY6,Q9VJY6;X2JE06	Drosophila melanogaster	tr;sp,sp;tr		2;1,1;1	1	uniprot-drosophila_reviewed_unreviewed_0825_2016	>tr|Q8SY98|Q8SY98_DROME RH14088p OS=Drosophila melanogaster GN=RpL24 PE=2 SV=1;>sp|Q9VJY6|RL24_DROME 60S ribosomal protein L24 OS=Drosophila melanogaster GN=RpL24 PE=1 SV=1,>sp|Q9VJY6|RL24_DROME 60S ribosomal protein L24 OS=Drosophila melanogaster GN=RpL24 PE=1 SV=1;>tr|X2JE06|X2JE06_DROME Ribosomal protein L24, isoform B OS=Drosophila melanogaster GN=RpL24 PE=1 SV=1	1	1
TRUE	Contr / Rep	Contr	Rep	6	F3YDP5;M9NDZ8	22.4495	13.8512	-0.696672	0.696672	-38.3006	0.616994	0	0.14219	0.0530288	5	0.423027	F3YDP5;M9NDZ8	F3YDP5_DROME;M9NDZ8_DROME	IP18912p (Fragment);Uncharacterized protein	CG43074-RA;CG43074	F3YDP5;M9NDZ8	Drosophila melanogaster	tr		2;4	1	uniprot-drosophila_reviewed_unreviewed_0825_2016	>tr|F3YDP5|F3YDP5_DROME IP18912p (Fragment) OS=Drosophila melanogaster GN=CG43074-RA PE=2 SV=1;>tr|M9NDZ8|M9NDZ8_DROME Uncharacterized protein OS=Drosophila melanogaster GN=CG43074 PE=4 SV=1	1	1
TRUE	Contr / Rep	Contr	Rep	6	A0A0B4LGI9;D2NUK5;H0RNI8;H9XQA9;Q8MMC4	20.77	26.432	0.347782	0.347782	27.2603	1.2726	0	0.142472	0.053037	5	0.178315	A0A0B4LGI9;D2NUK5;H0RNI8;H9XQA9;Q8MMC4,Q8MMC4	A0A0B4LGI9_DROME;D2NUK5_DROME;H0RNI8_DROME;H9XQA9_DROME;CDV3_DROME,CDV3_DROME	CG3760, isoform D;IP16103p;CG3760, isoform C;FI20107p1;Protein CDV3 homolog,Protein CDV3 homolog	CG3760;CG3760-RB;CG3760-RB;CG3760-RA;CG3760,CG3760	A0A0B4LGI9;D2NUK5;H0RNI8;H9XQA9;Q8MMC4,Q8MMC4	Drosophila melanogaster	tr;tr;tr;tr;sp,sp		1;2;1;2;1,1	1	uniprot-drosophila_reviewed_unreviewed_0825_2016	>tr|A0A0B4LGI9|A0A0B4LGI9_DROME CG3760, isoform D OS=Drosophila melanogaster GN=CG3760 PE=1 SV=1;>tr|D2NUK5|D2NUK5_DROME IP16103p OS=Drosophila melanogaster GN=CG3760-RB PE=2 SV=1;>tr|H0RNI8|H0RNI8_DROME CG3760, isoform C OS=Drosophila melanogaster GN=CG3760-RB PE=1 SV=1;>tr|H9XQA9|H9XQA9_DROME FI20107p1 OS=Drosophila melanogaster GN=CG3760-RA PE=2 SV=1;>sp|Q8MMC4|CDV3_DROME Protein CDV3 homolog …	1	1
TRUE	Contr / Rep	Contr	Rep	8	Q9VZU7	27.6614	42.2719	0.611823	0.611823	52.8189	1.52819	0	0.144239	0.0535969	7	0.205968	Q9VZU7	Q9VZU7_DROME	RE70722p	Usp5	Q9VZU7	Drosophila melanogaster	tr		1	1	uniprot-drosophila_reviewed_unreviewed_0825_2016	>tr|Q9VZU7|Q9VZU7_DROME RE70722p OS=Drosophila melanogaster GN=Usp5 PE=1 SV=1	2	4
TRUE	Contr / Rep	Contr	Rep	6	P11995	300.254	270.522	-0.150438	0.150438	-9.90233	0.900977	0	0.148909	0.0552319	5	0.0912793	P11995	LSP1A_DROME	Larval serum protein 1 alpha chain	Lsp1alpha	P11995	Drosophila melanogaster	sp		2	3	uniprot-drosophila_reviewed_unreviewed_0825_2016	>sp|P11995|LSP1A_DROME Larval serum protein 1 alpha chain OS=Drosophila melanogaster GN=Lsp1alpha PE=2 SV=3,>sp|P11995|LSP1A_DROME Larval serum protein 1 alpha chain OS=Drosophila melanogaster GN=Lsp1alpha PE=2 SV=3	1	1
TRUE	Contr / Rep	Contr	Rep	12	O97428	42.7425	64.551	0.59477	0.59477	51.0231	1.51023	0	0.155653	0.0576284	11	0.369523	O97428	O97428_DROME	Ciboulot, isoform A	cib	O97428	Drosophila melanogaster	tr		1	1	uniprot-drosophila_reviewed_unreviewed_0825_2016	>tr|O97428|O97428_DROME Ciboulot, isoform A OS=Drosophila melanogaster GN=cib PE=1 SV=1	3	3
TRUE	Contr / Rep	Contr	Rep	51	Q8T3P0;Q9VNX4	4779.38	3449.09	-0.470605	0.470605	-27.8338	0.721662	0	0.161476	0.059676	50	0.190038	Q8T3P0;Q9VNX4	Q8T3P0_DROME;Q9VNX4_DROME	GM01289p;Delta-1-Pyrroline-5-carboxylate dehydrogenase 1, isoform A	P5CDh1	Q8T3P0;Q9VNX4	Drosophila melanogaster	tr		2;1	1	uniprot-drosophila_reviewed_unreviewed_0825_2016	>tr|Q8T3P0|Q8T3P0_DROME GM01289p OS=Drosophila melanogaster GN=P5CDh1 PE=2 SV=1;>tr|Q9VNX4|Q9VNX4_DROME Delta-1-Pyrroline-5-carboxylate dehydrogenase 1, isoform A OS=Drosophila melanogaster GN=P5CDh1 PE=1 SV=1	8	10
TRUE	Contr / Rep	Contr	Rep	12	D2NUI1;Q9VBG7	89.5844	75.9204	-0.23876	0.23876	-15.2526	0.847474	0	0.164372	0.0606363	11	0.308352	D2NUI1;Q9VBG7	D2NUI1_DROME;Q9VBG7_DROME	TA01985p (Fragment);Uncharacterized protein, isoform A	CG31086-RA;CG31086	D2NUI1;Q9VBG7	Drosophila melanogaster	tr		2;1	1;2	uniprot-drosophila_reviewed_unreviewed_0825_2016	>tr|D2NUI1|D2NUI1_DROME TA01985p (Fragment) OS=Drosophila melanogaster GN=CG31086-RA PE=2 SV=1;>tr|Q9VBG7|Q9VBG7_DROME Uncharacterized protein, isoform A OS=Drosophila melanogaster GN=CG31086 PE=1 SV=2	1	2
TRUE	Contr / Rep	Contr	Rep	3	Q9VQT7	19.7049	37.4892	0.927923	0.927923	90.2535	1.90254	0	0.166796	0.0614196	2	0.312821	Q9VQT7	Q9VQT7_DROME	RH15675p	CG16713-RA	Q9VQT7	Drosophila melanogaster	tr		1	1	uniprot-drosophila_reviewed_unreviewed_0825_2016	>tr|Q9VQT7|Q9VQT7_DROME RH15675p OS=Drosophila melanogaster GN=CG16713-RA PE=1 SV=1	2	3
TRUE	Contr / Rep	Contr	Rep	6	A8Y560;O17445	628.641	772.368	0.297051	0.297051	22.863	1.22863	0	0.168023	0.0617599	5	0.167676	A8Y560;O17445,O17445	A8Y560_DROME;RL15_DROME,RL15_DROME	Ribosomal protein L15;60S ribosomal protein L15,60S ribosomal protein L15	RpL15	A8Y560;O17445,O17445	Drosophila melanogaster	tr;sp,sp		1	2;1,1	uniprot-drosophila_reviewed_unreviewed_0825_2016	>tr|A8Y560|A8Y560_DROME Ribosomal protein L15 OS=Drosophila melanogaster GN=RpL15 PE=1 SV=2;>sp|O17445|RL15_DROME 60S ribosomal protein L15 OS=Drosophila melanogaster GN=RpL15 PE=1 SV=1,>sp|O17445|RL15_DROME 60S ribosomal protein L15 OS=Drosophila melanogaster GN=RpL15 PE=1 SV=1	1	1
TRUE	Contr / Rep	Contr	Rep	18	Q8IN43	15523.3	10926.9	-0.506551	0.506551	-29.6097	0.703903	0	0.168573	0.0618183	17	0.315476	Q8IN43	TOTC_DROME	Protein Turandot C	TotC	Q8IN43	Drosophila melanogaster	sp		2	1	uniprot-drosophila_reviewed_unreviewed_0825_2016	>sp|Q8IN43|TOTC_DROME Protein Turandot C OS=Drosophila melanogaster GN=TotC PE=2 SV=1,>sp|Q8IN43|TOTC_DROME Protein Turandot C OS=Drosophila melanogaster GN=TotC PE=2 SV=1	3	3
TRUE	Contr / Rep	Contr	Rep	97	A0A0B4JCW4;Q9VHJ8	68500.2	65996.2	-0.053725	0.053725	-3.65545	0.963445	0	0.168788	0.0618183	96	0.0696756	A0A0B4JCW4;Q9VHJ8	A0A0B4JCW4_DROME;Q9VHJ8_DROME	Succinyl-CoA ligase subunit beta	skap	A0A0B4JCW4;Q9VHJ8	Drosophila melanogaster	tr		1	1;2	uniprot-drosophila_reviewed_unreviewed_0825_2016	>tr|A0A0B4JCW4|A0A0B4JCW4_DROME Succinyl-CoA ligase subunit beta OS=Drosophila melanogaster GN=skap PE=1 SV=1;>tr|Q9VHJ8|Q9VHJ8_DROME Succinyl-CoA ligase subunit beta OS=Drosophila melanogaster GN=skap PE=1 SV=2	12	17
TRUE	Contr / Rep	Contr	Rep	6	Q9VXI6	67.916	90.4006	0.412581	0.412581	33.1065	1.33106	0	0.169664	0.0620275	5	0.280671	Q9VXI6	Q9VXI6_DROME	Cytochrome b-c1 complex subunit 7	UQCR-14	Q9VXI6	Drosophila melanogaster	tr		1	1	uniprot-drosophila_reviewed_unreviewed_0825_2016	>tr|Q9VXI6|Q9VXI6_DROME Cytochrome b-c1 complex subunit 7 OS=Drosophila melanogaster GN=UQCR-14 PE=1 SV=1	1	1
TRUE	Contr / Rep	Contr	Rep	6	E5KZ94;M9PFK7;Q9VUQ5	21.3917	10.5575	-1.01878	1.01878	-50.6467	0.493533	0	0.177197	0.0646658	5	0.51593	E5KZ94;M9PFK7;Q9VUQ5,Q9VUQ5	E5KZ94_DROME;M9PFK7_DROME;AGO2_DROME,AGO2_DROME	AGO2 (Fragment);Argonaute 2, isoform E;Protein argonaute-2,Protein argonaute-2	;AGO2;AGO2,AGO2	E5KZ94;M9PFK7;Q9VUQ5,Q9VUQ5	Drosophila melanogaster	tr;tr;sp,sp		4;1;1,1	1;1;3,3	uniprot-drosophila_reviewed_unreviewed_0825_2016	>tr|E5KZ94|E5KZ94_DROME AGO2 (Fragment) OS=Drosophila melanogaster PE=4 SV=1;>tr|M9PFK7|M9PFK7_DROME Argonaute 2, isoform E OS=Drosophila melanogaster GN=AGO2 PE=1 SV=1;>sp|Q9VUQ5|AGO2_DROME Protein argonaute-2 OS=Drosophila melanogaster GN=AGO2 PE=1 SV=3,>sp|Q9VUQ5|AGO2_DROME Protein argonaute-2 OS=Drosophila melanogaster GN=AGO2 PE=1 SV=3	1	1
TRUE	Contr / Rep	Contr	Rep	12	D0IQG9;Q7K571;Q7KUW2;Q9VWV2;Q9VWV4;Q9VWV5	119.272	140.062	0.231808	0.231808	17.4306	1.17431	0	0.178824	0.0651431	11	0.141625	D0IQG9;Q7K571;Q7KUW2;Q9VWV2;Q9VWV4;Q9VWV5	D0IQG9_DROME;Q7K571_DROME;Q7KUW2_DROME;Q9VWV2_DROME;Q9VWV4_DROME;Q9VWV5_DROME	GM12308p;GH10029p;RH50433p;Uncharacterized protein, isoform D;GH28326p;Uncharacterized protein, isoform G	CG32549-RA;CG6247;CG32549-RF;CG32549;CG32549-RE;CG32549	D0IQG9;Q7K571;Q7KUW2;Q9VWV2;Q9VWV4;Q9VWV5	Drosophila melanogaster	tr		2;2;1;1;1;1	1;1;1;2;2;3	uniprot-drosophila_reviewed_unreviewed_0825_2016	>tr|D0IQG9|D0IQG9_DROME GM12308p OS=Drosophila melanogaster GN=CG32549-RA PE=2 SV=1;>tr|Q7K571|Q7K571_DROME GH10029p OS=Drosophila melanogaster GN=CG6247 PE=2 SV=1;>tr|Q7KUW2|Q7KUW2_DROME RH50433p OS=Drosophila melanogaster GN=CG32549-RF PE=1 SV=1;>tr|Q9VWV2|Q9VWV2_DROME Uncharacterized protein, isoform D OS=Drosophila melanogaster GN=CG32549 PE=1 SV=2;>tr|Q9VWV4|Q9VWV4_DROME GH28326p OS=Drosophi…	2	2
TRUE	Contr / Rep	Contr	Rep	24	Q24036;Q59E30;Q95RI5	313.748	462.382	0.55948	0.55948	47.3738	1.47374	0	0.179976	0.0654457	23	0.196081	Q24036;Q59E30;Q95RI5,Q95RI5	Q24036_DROME;Q59E30_DROME;FAXC_DROME,FAXC_DROME	Failed axon connections protein;Failed axon connections, isoform C;Failed axon connections,Failed axon connections	fax	Q24036;Q59E30;Q95RI5,Q95RI5	Drosophila melanogaster	tr;tr;sp,sp		2;1;1,1	1	uniprot-drosophila_reviewed_unreviewed_0825_2016	>tr|Q24036|Q24036_DROME Failed axon connections protein OS=Drosophila melanogaster GN=fax PE=2 SV=1;>tr|Q59E30|Q59E30_DROME Failed axon connections, isoform C OS=Drosophila melanogaster GN=fax PE=1 SV=1;>sp|Q95RI5|FAXC_DROME Failed axon connections OS=Drosophila melanogaster GN=fax PE=1 SV=1,>sp|Q95RI5|FAXC_DROME Failed axon connections OS=Drosophila melanogaster GN=fax PE=1 SV=1	3	4
TRUE	Contr / Rep	Contr	Rep	12	M9PEL3;O61538;O61539;Q9VS54	12.0382	12.9116	0.101045	0.101045	7.25498	1.07255	0	0.183335	0.0665487	11	0.244552	M9PEL3;O61538;O61539;Q9VS54	M9PEL3_DROME;O61538_DROME;O61539_DROME;Q9VS54_DROME	Quemao, isoform C;Geranylgeranyl pyrophosphate synthase;Geranylgeranyl pyrophosphate synthase;Quemao, isoform A	qm	M9PEL3;O61538;O61539;Q9VS54	Drosophila melanogaster	tr		1;3;2;1	1	uniprot-drosophila_reviewed_unreviewed_0825_2016	>tr|M9PEL3|M9PEL3_DROME Quemao, isoform C OS=Drosophila melanogaster GN=qm PE=1 SV=1;>tr|O61538|O61538_DROME Geranylgeranyl pyrophosphate synthase OS=Drosophila melanogaster GN=qm PE=3 SV=1;>tr|O61539|O61539_DROME Geranylgeranyl pyrophosphate synthase OS=Drosophila melanogaster GN=qm PE=2 SV=1;>tr|Q9VS54|Q9VS54_DROME Quemao, isoform A OS=Drosophila melanogaster GN=qm PE=1 SV=1	2	2
TRUE	Contr / Rep	Contr	Rep	84	Q4QPQ0;Q9VLC5	115508	95512.3	-0.274239	0.274239	-17.3114	0.826886	0	0.18411	0.0667112	83	0.0766686	Q4QPQ0;Q9VLC5	Q4QPQ0_DROME;Q9VLC5_DROME	GH22814p (Fragment);Aldehyde dehydrogenase	;Aldh	Q4QPQ0;Q9VLC5	Drosophila melanogaster	tr		2;1	1	uniprot-drosophila_reviewed_unreviewed_0825_2016	>tr|Q4QPQ0|Q4QPQ0_DROME GH22814p (Fragment) OS=Drosophila melanogaster PE=2 SV=1;>tr|Q9VLC5|Q9VLC5_DROME Aldehyde dehydrogenase OS=Drosophila melanogaster GN=Aldh PE=1 SV=1	13	15
TRUE	Contr / Rep	Contr	Rep	6	Q9VG69	25.9337	28.415	0.131825	0.131825	9.56788	1.09568	0	0.185576	0.0670045	5	0.0840979	Q9VG69	Q9VG69_DROME	CG5844	CG5844	Q9VG69	Drosophila melanogaster	tr		1	1	uniprot-drosophila_reviewed_unreviewed_0825_2016	>tr|Q9VG69|Q9VG69_DROME CG5844 OS=Drosophila melanogaster GN=CG5844 PE=1 SV=1	1	1
TRUE	Contr / Rep	Contr	Rep	13	Q9VY05	143.231	213.927	0.578782	0.578782	49.3588	1.49359	0	0.185371	0.0670045	12	0.219926	Q9VY05	Q9VY05_DROME	CG9512, isoform A	CG9512	Q9VY05	Drosophila melanogaster	tr		1	1	uniprot-drosophila_reviewed_unreviewed_0825_2016	>tr|Q9VY05|Q9VY05_DROME CG9512, isoform A OS=Drosophila melanogaster GN=CG9512 PE=1 SV=1	2	3
TRUE	Contr / Rep	Contr	Rep	42	P29746	133.28	156.254	0.22943	0.22943	17.2371	1.17237	0	0.186964	0.0673863	41	0.146426	P29746	BNB_DROME	Protein bangles and beads	bnb	P29746	Drosophila melanogaster	sp		1	1	uniprot-drosophila_reviewed_unreviewed_0825_2016	>sp|P29746|BNB_DROME Protein bangles and beads OS=Drosophila melanogaster GN=bnb PE=1 SV=1,>sp|P29746|BNB_DROME Protein bangles and beads OS=Drosophila melanogaster GN=bnb PE=1 SV=1	7	7
TRUE	Contr / Rep	Contr	Rep	103	B5RIM9;M9PC43;M9PET0;P13706	291762	238105	-0.293192	0.293192	-18.3906	0.816094	0	0.197278	0.0709291	102	0.0580447	B5RIM9;M9PC43;M9PET0;P13706,P13706	B5RIM9_DROME;M9PC43_DROME;M9PET0_DROME;GPDA_DROME,GPDA_DROME	Glycerol-3-phosphate dehydrogenase [NAD(+)];Glycerol-3-phosphate dehydrogenase [NAD(+)];Glycerol-3-phosphate dehydrogenase [NAD(+)];Glycerol-3-phosphate dehydrogenase [NAD(+)], cytoplasmic,Glycerol-3-phosphate dehydrogenase [NAD(+)], cytoplasmic	Gpdh	B5RIM9;M9PC43;M9PET0;P13706,P13706	Drosophila melanogaster	tr;tr;tr;sp,sp		1	1;1;1;3,3	uniprot-drosophila_reviewed_unreviewed_0825_2016	>tr|B5RIM9|B5RIM9_DROME Glycerol-3-phosphate dehydrogenase [NAD(+)] OS=Drosophila melanogaster GN=Gpdh PE=1 SV=1;>tr|M9PC43|M9PC43_DROME Glycerol-3-phosphate dehydrogenase [NAD(+)] OS=Drosophila melanogaster GN=Gpdh PE=1 SV=1;>tr|M9PET0|M9PET0_DROME Glycerol-3-phosphate dehydrogenase [NAD(+)] OS=Drosophila melanogaster GN=Gpdh PE=1 SV=1;>sp|P13706|GPDA_DROME Glycerol-3-phosphate dehydrogenase [NA…	13	20
TRUE	Contr / Rep	Contr	Rep	6	Q7KMR7;Q9VRP3	266.226	223.228	-0.254133	0.254133	-16.1509	0.838491	0	0.197489	0.0709291	5	0.145464	Q7KMR7;Q9VRP3	Q7KMR7_DROME;Q9VRP3_DROME	Thioredoxin-like protein TXL;AT08565p	Txl	Q7KMR7;Q9VRP3	Drosophila melanogaster	tr		2;1	1	uniprot-drosophila_reviewed_unreviewed_0825_2016	>tr|Q7KMR7|Q7KMR7_DROME Thioredoxin-like protein TXL OS=Drosophila melanogaster GN=Txl PE=2 SV=1;>tr|Q9VRP3|Q9VRP3_DROME AT08565p OS=Drosophila melanogaster GN=Txl PE=1 SV=1	1	1
TRUE	Contr / Rep	Contr	Rep	12	M9ND19;Q8MZ78;Q9W0P5	111.043	101.645	-0.12758	0.12758	-8.46346	0.915365	0	0.202984	0.0727746	11	0.172967	M9ND19;Q8MZ78;Q9W0P5,Q9W0P5	M9ND19_DROME;Q8MZ78_DROME;GALE_DROME,GALE_DROME	UDP-galactose 4'-epimerase, isoform B;AT27946p;UDP-glucose 4-epimerase,UDP-glucose 4-epimerase	Gale	M9ND19;Q8MZ78;Q9W0P5,Q9W0P5	Drosophila melanogaster	tr;tr;sp,sp		1;2;1,1	1	uniprot-drosophila_reviewed_unreviewed_0825_2016	>tr|M9ND19|M9ND19_DROME UDP-galactose 4'-epimerase, isoform B OS=Drosophila melanogaster GN=Gale PE=1 SV=1;>tr|Q8MZ78|Q8MZ78_DROME AT27946p OS=Drosophila melanogaster GN=Gale PE=2 SV=1;>sp|Q9W0P5|GALE_DROME UDP-glucose 4-epimerase OS=Drosophila melanogaster GN=Gale PE=1 SV=1,>sp|Q9W0P5|GALE_DROME UDP-glucose 4-epimerase OS=Drosophila melanogaster GN=Gale PE=1 SV=1	3	3
TRUE	Contr / Rep	Contr	Rep	46	Q9VVL7	3236.21	4537.57	0.487616	0.487616	40.2126	1.40213	0	0.207481	0.0742563	45	0.180426	Q9VVL7	Q9VVL7_DROME	Dihydrolipoyl dehydrogenase	CG7430	Q9VVL7	Drosophila melanogaster	tr		1	1	uniprot-drosophila_reviewed_unreviewed_0825_2016	>tr|Q9VVL7|Q9VVL7_DROME Dihydrolipoyl dehydrogenase OS=Drosophila melanogaster GN=CG7430 PE=1 SV=1	6	8
TRUE	Contr / Rep	Contr	Rep	20	Q86NQ0;Q9VN44	371.878	311.994	-0.253312	0.253312	-16.1032	0.838968	0	0.211189	0.075451	19	0.111855	Q86NQ0;Q9VN44	Q86NQ0_DROME;Q9VN44_DROME	GH07384p;FI07923p	Karybeta3	Q86NQ0;Q9VN44	Drosophila melanogaster	tr		2;1	1	uniprot-drosophila_reviewed_unreviewed_0825_2016	>tr|Q86NQ0|Q86NQ0_DROME GH07384p OS=Drosophila melanogaster GN=Karybeta3 PE=2 SV=1;>tr|Q9VN44|Q9VN44_DROME FI07923p OS=Drosophila melanogaster GN=Karybeta3 PE=1 SV=1	4	6
TRUE	Contr / Rep	Contr	Rep	53	Q86NS7;Q8IRD3;Q8IRD4;Q9VZQ8	18135.7	16934.7	-0.0988522	0.0988522	-6.62244	0.933776	0	0.212998	0.0758871	52	0.0751983	Q86NS7;Q8IRD3;Q8IRD4;Q9VZQ8	Q86NS7_DROME;Q8IRD3_DROME;Q8IRD4_DROME;Q9VZQ8_DROME	Glutathione peroxidase	CG12013;PHGPx;PHGPx;PHGPx	Q86NS7;Q8IRD3;Q8IRD4;Q9VZQ8	Drosophila melanogaster	tr		2;1;1;1	1	uniprot-drosophila_reviewed_unreviewed_0825_2016	>tr|Q86NS7|Q86NS7_DROME Glutathione peroxidase OS=Drosophila melanogaster GN=CG12013 PE=2 SV=1;>tr|Q8IRD3|Q8IRD3_DROME Glutathione peroxidase OS=Drosophila melanogaster GN=PHGPx PE=1 SV=1;>tr|Q8IRD4|Q8IRD4_DROME Glutathione peroxidase OS=Drosophila melanogaster GN=PHGPx PE=1 SV=1;>tr|Q9VZQ8|Q9VZQ8_DROME Glutathione peroxidase OS=Drosophila melanogaster GN=PHGPx PE=1 SV=1	5	10
TRUE	Contr / Rep	Contr	Rep	24	Q7K0E6;Q9XYM1	65.9604	67.5493	0.0343413	0.0343413	2.40891	1.02409	0	0.213153	0.0758871	23	0.0951845	Q7K0E6;Q9XYM1	Q7K0E6_DROME;Q9XYM1_DROME	Aspartyl-tRNA synthetase, isoform A;Aspartyl tRNA synthetase	AspRS	Q7K0E6;Q9XYM1	Drosophila melanogaster	tr		1;2	1	uniprot-drosophila_reviewed_unreviewed_0825_2016	>tr|Q7K0E6|Q7K0E6_DROME Aspartyl-tRNA synthetase, isoform A OS=Drosophila melanogaster GN=AspRS PE=1 SV=1;>tr|Q9XYM1|Q9XYM1_DROME Aspartyl tRNA synthetase OS=Drosophila melanogaster GN=AspRS PE=2 SV=1	4	4
TRUE	Contr / Rep	Contr	Rep	60	Q9W3L4	131670	134584	0.0315788	0.0315788	2.21301	1.02213	0	0.214177	0.0760454	59	0.137635	Q9W3L4	Q9W3L4_DROME	CG2233	CG2233	Q9W3L4	Drosophila melanogaster	tr		1	1	uniprot-drosophila_reviewed_unreviewed_0825_2016	>tr|Q9W3L4|Q9W3L4_DROME CG2233 OS=Drosophila melanogaster GN=CG2233 PE=1 SV=1	8	10
TRUE	Contr / Rep	Contr	Rep	6	Q9VYT0	67.3307	79.8967	0.246872	0.246872	18.6632	1.18663	0	0.214344	0.0760454	5	0.170072	Q9VYT0	Q9VYT0_DROME	RE04130p	CG15739	Q9VYT0	Drosophila melanogaster	tr		1	2	uniprot-drosophila_reviewed_unreviewed_0825_2016	>tr|Q9VYT0|Q9VYT0_DROME RE04130p OS=Drosophila melanogaster GN=CG15739 PE=1 SV=2	1	1
TRUE	Contr / Rep	Contr	Rep	12	Q9VH09	320.113	471.475	0.558601	0.558601	47.2841	1.47284	0	0.218091	0.0772407	11	0.350895	Q9VH09	Q9VH09_DROME	CG3999, isoform A	CG3999	Q9VH09	Drosophila melanogaster	tr		1	1	uniprot-drosophila_reviewed_unreviewed_0825_2016	>tr|Q9VH09|Q9VH09_DROME CG3999, isoform A OS=Drosophila melanogaster GN=CG3999 PE=1 SV=1	2	2
TRUE	Contr / Rep	Contr	Rep	124	O16157;Q8MSI2	958983	872714	-0.135996	0.135996	-8.99585	0.910041	0	0.220155	0.0778364	123	0.0517813	O16157;Q8MSI2	O16157_DROME;Q8MSI2_DROME	Calcium-binding protein (Fragment);GH15296p	Scp1	O16157;Q8MSI2	Drosophila melanogaster	tr		2;1	1	uniprot-drosophila_reviewed_unreviewed_0825_2016	>tr|O16157|O16157_DROME Calcium-binding protein (Fragment) OS=Drosophila melanogaster GN=Scp1 PE=2 SV=1;>tr|Q8MSI2|Q8MSI2_DROME GH15296p OS=Drosophila melanogaster GN=Scp1 PE=1 SV=1	10	24
TRUE	Contr / Rep	Contr	Rep	6	A9UNH6;Q9VYJ1	158.221	197.761	0.321818	0.321818	24.9905	1.2499	0	0.220739	0.077908	5	0.283446	A9UNH6;Q9VYJ1	A9UNH6_DROME;Q9VYJ1_DROME	RE06041p;CG3775, isoform A	;CG3775-RA	A9UNH6;Q9VYJ1	Drosophila melanogaster	tr		2	1	uniprot-drosophila_reviewed_unreviewed_0825_2016	>tr|A9UNH6|A9UNH6_DROME RE06041p OS=Drosophila melanogaster PE=2 SV=1;>tr|Q9VYJ1|Q9VYJ1_DROME CG3775, isoform A OS=Drosophila melanogaster GN=CG3775-RA PE=2 SV=1	1	1
TRUE	Contr / Rep	Contr	Rep	6	F6J877;F6J881;F6J894;Q9VWU1	61.6112	51.9873	-0.245033	0.245033	-15.6204	0.843796	0	0.221588	0.0780723	5	0.221459	F6J877;F6J881;F6J894;Q9VWU1,Q9VWU1	F6J877_DROME;F6J881_DROME;F6J894_DROME;PSH_DROME,PSH_DROME	CG6367 (Fragment);CG6367 (Fragment);CG6367 (Fragment);Serine protease persephone,Serine protease persephone	CG6367;CG6367;CG6367;psh,psh	F6J877;F6J881;F6J894;Q9VWU1,Q9VWU1	Drosophila melanogaster	tr;tr;tr;sp,sp		4;4;4;1,1	1	uniprot-drosophila_reviewed_unreviewed_0825_2016	>tr|F6J877|F6J877_DROME CG6367 (Fragment) OS=Drosophila melanogaster GN=CG6367 PE=4 SV=1;>tr|F6J881|F6J881_DROME CG6367 (Fragment) OS=Drosophila melanogaster GN=CG6367 PE=4 SV=1;>tr|F6J894|F6J894_DROME CG6367 (Fragment) OS=Drosophila melanogaster GN=CG6367 PE=4 SV=1;>sp|Q9VWU1|PSH_DROME Serine protease persephone OS=Drosophila melanogaster GN=psh PE=1 SV=1,>sp|Q9VWU1|PSH_DROME Serine protease per…	1	1
TRUE	Contr / Rep	Contr	Rep	6	Q8SYN6;Q9VSC5	22.8518	25.5681	0.162032	0.162032	11.8862	1.11886	0	0.227659	0.0800375	5	0.135304	Q8SYN6;Q9VSC5	Q8SYN6_DROME;Q9VSC5_DROME	RE50471p;CG8209	CG8209	Q8SYN6;Q9VSC5	Drosophila melanogaster	tr		2;1	1	uniprot-drosophila_reviewed_unreviewed_0825_2016	>tr|Q8SYN6|Q8SYN6_DROME RE50471p OS=Drosophila melanogaster GN=CG8209 PE=2 SV=1;>tr|Q9VSC5|Q9VSC5_DROME CG8209 OS=Drosophila melanogaster GN=CG8209 PE=1 SV=1	1	1
TRUE	Contr / Rep	Contr	Rep	6	Q9V436	52.8883	46.1835	-0.195572	0.195572	-12.6773	0.873227	0	0.22795	0.0800375	5	0.147064	Q9V436	Q9V436_DROME	26S proteasome regulatory complex subunit p30	Rpn12	Q9V436	Drosophila melanogaster	tr		1	1	uniprot-drosophila_reviewed_unreviewed_0825_2016	>tr|Q9V436|Q9V436_DROME 26S proteasome regulatory complex subunit p30 OS=Drosophila melanogaster GN=Rpn12 PE=1 SV=1	1	1
TRUE	Contr / Rep	Contr	Rep	24	Q7KXK5;Q9VA37	2668.93	3409.77	0.353411	0.353411	27.7578	1.27758	0	0.232845	0.0816158	23	0.241904	Q7KXK5;Q9VA37	Q7KXK5_DROME;Q9VA37_DROME	DJ-1 beta;Dj-1beta	dj-1beta	Q7KXK5;Q9VA37	Drosophila melanogaster	tr		2;1	1;3	uniprot-drosophila_reviewed_unreviewed_0825_2016	>tr|Q7KXK5|Q7KXK5_DROME DJ-1 beta OS=Drosophila melanogaster GN=dj-1beta PE=2 SV=1;>tr|Q9VA37|Q9VA37_DROME Dj-1beta OS=Drosophila melanogaster GN=dj-1beta PE=1 SV=3	3	4
TRUE	Contr / Rep	Contr	Rep	18	Q9VJQ3	390.455	526.249	0.430591	0.430591	34.7786	1.34779	0	0.238823	0.0835675	17	0.129919	Q9VJQ3	Q9VJQ3_DROME	RH54244p	yellow-c	Q9VJQ3	Drosophila melanogaster	tr		1	3	uniprot-drosophila_reviewed_unreviewed_0825_2016	>tr|Q9VJQ3|Q9VJQ3_DROME RH54244p OS=Drosophila melanogaster GN=yellow-c PE=1 SV=3	3	3
TRUE	Contr / Rep	Contr	Rep	31	A0A0B4LGS0;P08144;P81641;Q2VY99;Q2VYA0;Q2VYA1;Q2VYA2;Q2VYA3;Q5BIJ9	1331.62	1422.75	0.0954955	0.0954955	6.84323	1.06843	0	0.240085	0.0838653	30	0.0946062	A0A0B4LGS0;P08144,P08144;P81641,P81641;Q2VY99;Q2VYA0;Q2VYA1;Q2VYA2;Q2VYA3;Q5BIJ9	A0A0B4LGS0_DROME;AMYA_DROME,AMYA_DROME;AMYB_DROME,AMYB_DROME;Q2VY99_DROME;Q2VYA0_DROME;Q2VYA1_DROME;Q2VYA2_DROME;Q2VYA3_DROME;Q5BIJ9_DROME	Amylase proximal, isoform B;Alpha-amylase A,Alpha-amylase A;Alpha-amylase B,Alpha-amylase B;Amylase;Amylase;Amylase;Amylase;Amylase;RH48856p	Amy-p;Amy-p,Amy-p;Amy-d,Amy-d;Amy-d;Amy-p;Amy-p;Amy-d;Amy-p;Amy-d	A0A0B4LGS0;P08144,P08144;P81641,P81641;Q2VY99;Q2VYA0;Q2VYA1;Q2VYA2;Q2VYA3;Q5BIJ9	Drosophila melanogaster	tr;sp,sp;sp,sp;tr;tr;tr;tr;tr;tr		3;2,2;3,3;2;2;2;2;2;2	1;1,1;3,3;1;1;1;1;1;1	uniprot-drosophila_reviewed_unreviewed_0825_2016	>tr|A0A0B4LGS0|A0A0B4LGS0_DROME Amylase proximal, isoform B OS=Drosophila melanogaster GN=Amy-p PE=3 SV=1;>sp|P08144|AMYA_DROME Alpha-amylase A OS=Drosophila melanogaster GN=Amy-p PE=2 SV=1,>sp|P08144|AMYA_DROME Alpha-amylase A OS=Drosophila melanogaster GN=Amy-p PE=2 SV=1;>sp|P81641|AMYB_DROME Alpha-amylase B OS=Drosophila melanogaster GN=Amy-d PE=3 SV=3,>sp|P81641|AMYB_DROME Alpha-amylase B OS=…	4	8
TRUE	Contr / Rep	Contr	Rep	6	A0A0B4K7Q3;D6W4T6;Q8IMK7;Q961C5;Q9VAK1	9.62741	8.18208	-0.23468	0.23468	-15.0126	0.849874	0	0.241396	0.0840717	5	0.179787	A0A0B4K7Q3;D6W4T6;Q8IMK7;Q961C5;Q9VAK1	A0A0B4K7Q3_DROME;D6W4T6_DROME;Q8IMK7_DROME;Q961C5_DROME;Q9VAK1_DROME	Alphabet, isoform F;MIP21566p;Alphabet, isoform B;Alphabet, isoform E;Alphabet, isoform A	alph;alph-RE;alph;alph;alph	A0A0B4K7Q3;D6W4T6;Q8IMK7;Q961C5;Q9VAK1	Drosophila melanogaster	tr		1;2;1;1;1	1	uniprot-drosophila_reviewed_unreviewed_0825_2016	>tr|A0A0B4K7Q3|A0A0B4K7Q3_DROME Alphabet, isoform F OS=Drosophila melanogaster GN=alph PE=1 SV=1;>tr|D6W4T6|D6W4T6_DROME MIP21566p OS=Drosophila melanogaster GN=alph-RE PE=2 SV=1;>tr|Q8IMK7|Q8IMK7_DROME Alphabet, isoform B OS=Drosophila melanogaster GN=alph PE=1 SV=1;>tr|Q961C5|Q961C5_DROME Alphabet, isoform E OS=Drosophila melanogaster GN=alph PE=1 SV=1;>tr|Q9VAK1|Q9VAK1_DROME Alphabet, isoform …	1	1
TRUE	Contr / Rep	Contr	Rep	2	Q9VTZ6	34.3674	17.838	-0.946085	0.946085	-48.0961	0.519039	0	0.2415	0.0840717	1	0.753317	Q9VTZ6	PMM_DROME	Probable phosphomannomutase	CG10688	Q9VTZ6	Drosophila melanogaster	sp		2	1	uniprot-drosophila_reviewed_unreviewed_0825_2016	>sp|Q9VTZ6|PMM_DROME Probable phosphomannomutase OS=Drosophila melanogaster GN=CG10688 PE=2 SV=1,>sp|Q9VTZ6|PMM_DROME Probable phosphomannomutase OS=Drosophila melanogaster GN=CG10688 PE=2 SV=1	1	1
TRUE	Contr / Rep	Contr	Rep	6	B5RIJ9;Q8MT23;Q9VJ19	138.137	120.974	-0.191408	0.191408	-12.425	0.87575	0	0.246747	0.0857519	5	0.161733	B5RIJ9;Q8MT23;Q9VJ19	B5RIJ9_DROME;Q8MT23_DROME;Q9VJ19_DROME	FI02875p (Fragment);RH09938p;RE25263p	;RpL30;RpL30	B5RIJ9;Q8MT23;Q9VJ19	Drosophila melanogaster	tr		2;2;1	1	uniprot-drosophila_reviewed_unreviewed_0825_2016	>tr|B5RIJ9|B5RIJ9_DROME FI02875p (Fragment) OS=Drosophila melanogaster PE=2 SV=1;>tr|Q8MT23|Q8MT23_DROME RH09938p OS=Drosophila melanogaster GN=RpL30 PE=2 SV=1;>tr|Q9VJ19|Q9VJ19_DROME RE25263p OS=Drosophila melanogaster GN=RpL30 PE=1 SV=1	1	1
TRUE	Contr / Rep	Contr	Rep	6	M9PC31;M9PEF6;Q9VQX4	28.9514	36.4133	0.330832	0.330832	25.7738	1.25774	0	0.247396	0.0858314	5	0.387738	M9PC31;M9PEF6;Q9VQX4,Q9VQX4	M9PC31_DROME;M9PEF6_DROME;PNCB_DROME,PNCB_DROME	CG3714, isoform G;CG3714, isoform H;Nicotinate phosphoribosyltransferase,Nicotinate phosphoribosyltransferase	CG3714	M9PC31;M9PEF6;Q9VQX4,Q9VQX4	Drosophila melanogaster	tr;tr;sp,sp		4;4;2,2	1;1;2,2	uniprot-drosophila_reviewed_unreviewed_0825_2016	>tr|M9PC31|M9PC31_DROME CG3714, isoform G OS=Drosophila melanogaster GN=CG3714 PE=4 SV=1;>tr|M9PEF6|M9PEF6_DROME CG3714, isoform H OS=Drosophila melanogaster GN=CG3714 PE=4 SV=1;>sp|Q9VQX4|PNCB_DROME Nicotinate phosphoribosyltransferase OS=Drosophila melanogaster GN=CG3714 PE=2 SV=2,>sp|Q9VQX4|PNCB_DROME Nicotinate phosphoribosyltransferase OS=Drosophila melanogaster GN=CG3714 PE=2 SV=2	1	1
TRUE	Contr / Rep	Contr	Rep	6	Q4V3J4;Q4V3V6;Q9VFL9	39.7911	33.1223	-0.264643	0.264643	-16.7595	0.832405	0	0.249625	0.0864577	5	0.192306	Q4V3J4;Q4V3V6;Q9VFL9	Q4V3J4_DROME;Q4V3V6_DROME;Q9VFL9_DROME	IP10312p;IP10012p;FI07901p	CG33109;CG33109;CG33109-RA	Q4V3J4;Q4V3V6;Q9VFL9	Drosophila melanogaster	tr		2	1;1;2	uniprot-drosophila_reviewed_unreviewed_0825_2016	>tr|Q4V3J4|Q4V3J4_DROME IP10312p OS=Drosophila melanogaster GN=CG33109 PE=2 SV=1;>tr|Q4V3V6|Q4V3V6_DROME IP10012p OS=Drosophila melanogaster GN=CG33109 PE=2 SV=1;>tr|Q9VFL9|Q9VFL9_DROME FI07901p OS=Drosophila melanogaster GN=CG33109-RA PE=2 SV=2	1	1
TRUE	Contr / Rep	Contr	Rep	6	B7Z107	56.5527	76.0724	0.427777	0.427777	34.516	1.34516	0	0.263109	0.0909732	5	0.237449	B7Z107	B7Z107_DROME	GH09380p1	cin-RB	B7Z107	Drosophila melanogaster	tr		2	1	uniprot-drosophila_reviewed_unreviewed_0825_2016	>tr|B7Z107|B7Z107_DROME GH09380p1 OS=Drosophila melanogaster GN=cin-RB PE=2 SV=1	1	1
TRUE	Contr / Rep	Contr	Rep	12	A4VA32;A4VA33;I7CDY4;Q9V3Y7	264.88	512.432	0.952023	0.952023	93.4583	1.93458	0	0.269263	0.0929435	11	0.263933	A4VA32;A4VA33;I7CDY4;Q9V3Y7	A4VA32_DROME;A4VA33_DROME;I7CDY4_DROME;Q9V3Y7_DROME	CG15293 protein (Fragment);CG15293 protein (Fragment);FI20725p1 (Fragment);Uncharacterized protein, isoform A	CG15293;CG15293;CG15293-RA;CG15293	A4VA32;A4VA33;I7CDY4;Q9V3Y7	Drosophila melanogaster	tr		4;4;2;1	1	uniprot-drosophila_reviewed_unreviewed_0825_2016	>tr|A4VA32|A4VA32_DROME CG15293 protein (Fragment) OS=Drosophila melanogaster GN=CG15293 PE=4 SV=1;>tr|A4VA33|A4VA33_DROME CG15293 protein (Fragment) OS=Drosophila melanogaster GN=CG15293 PE=4 SV=1;>tr|I7CDY4|I7CDY4_DROME FI20725p1 (Fragment) OS=Drosophila melanogaster GN=CG15293-RA PE=2 SV=1;>tr|Q9V3Y7|Q9V3Y7_DROME Uncharacterized protein, isoform A OS=Drosophila melanogaster GN=CG15293 PE=1 SV=1	2	2
TRUE	Contr / Rep	Contr	Rep	6	F3YDH5;P29843;Q8IH88	2391.47	2547.51	0.0911918	0.0911918	6.52498	1.06525	0	0.270663	0.0932692	5	0.093233	F3YDH5;P29843,P29843;Q8IH88	F3YDH5_DROME;HSP7A_DROME,HSP7A_DROME;Q8IH88_DROME	AT29089p (Fragment);Heat shock 70 kDa protein cognate 1,Heat shock 70 kDa protein cognate 1;AT28834p (Fragment)	Hsc70-1-RA;Hsc70-1,Hsc70-1;Hsc70-1	F3YDH5;P29843,P29843;Q8IH88	Drosophila melanogaster	tr;sp,sp;tr		2;1,1;2	1	uniprot-drosophila_reviewed_unreviewed_0825_2016	>tr|F3YDH5|F3YDH5_DROME AT29089p (Fragment) OS=Drosophila melanogaster GN=Hsc70-1-RA PE=2 SV=1;>sp|P29843|HSP7A_DROME Heat shock 70 kDa protein cognate 1 OS=Drosophila melanogaster GN=Hsc70-1 PE=1 SV=1,>sp|P29843|HSP7A_DROME Heat shock 70 kDa protein cognate 1 OS=Drosophila melanogaster GN=Hsc70-1 PE=1 SV=1;>tr|Q8IH88|Q8IH88_DROME AT28834p (Fragment) OS=Drosophila melanogaster GN=Hsc70-1 PE=2 SV=1	1	1
TRUE	Contr / Rep	Contr	Rep	59	Q960M4	42390.8	38215.6	-0.14959	0.14959	-9.84933	0.901507	0	0.278461	0.0957942	58	0.173637	Q960M4	Q960M4_DROME	LD45324p	Prx5	Q960M4	Drosophila melanogaster	tr		1	1	uniprot-drosophila_reviewed_unreviewed_0825_2016	>tr|Q960M4|Q960M4_DROME LD45324p OS=Drosophila melanogaster GN=Prx5 PE=1 SV=1	7	10
TRUE	Contr / Rep	Contr	Rep	18	Q9VL68	738.539	706.901	-0.0631657	0.0631657	-4.28385	0.957162	0	0.280052	0.0961795	17	0.152434	Q9VL68	Q9VL68_DROME	CG4598, isoform A	CG4598	Q9VL68	Drosophila melanogaster	tr		1	2	uniprot-drosophila_reviewed_unreviewed_0825_2016	>tr|Q9VL68|Q9VL68_DROME CG4598, isoform A OS=Drosophila melanogaster GN=CG4598 PE=1 SV=2	5	5
TRUE	Contr / Rep	Contr	Rep	23	Q9VTZ4	81.729	78.1625	-0.0643721	0.0643721	-4.36386	0.956361	0	0.282568	0.0968804	22	0.175381	Q9VTZ4	Q9VTZ4_DROME	LD02044p	nst	Q9VTZ4	Drosophila melanogaster	tr		1	1	uniprot-drosophila_reviewed_unreviewed_0825_2016	>tr|Q9VTZ4|Q9VTZ4_DROME LD02044p OS=Drosophila melanogaster GN=nst PE=1 SV=1	4	4
TRUE	Contr / Rep	Contr	Rep	6	H1UUC9;M9PC90;Q27268	16.7991	11.7006	-0.521805	0.521805	-30.35	0.6965	0	0.284667	0.097126	5	0.504815	H1UUC9;M9PC90;Q27268,Q27268	H1UUC9_DROME;M9PC90_DROME;DX39B_DROME,DX39B_DROME	MIP33368p1;Helicase at 25E, isoform D;ATP-dependent RNA helicase WM6,ATP-dependent RNA helicase WM6	Hel25E-RB;Hel25E;Hel25E,Hel25E	H1UUC9;M9PC90;Q27268,Q27268	Drosophila melanogaster	tr;tr;sp,sp		2;1;1,1	1	uniprot-drosophila_reviewed_unreviewed_0825_2016	>tr|H1UUC9|H1UUC9_DROME MIP33368p1 OS=Drosophila melanogaster GN=Hel25E-RB PE=2 SV=1;>tr|M9PC90|M9PC90_DROME Helicase at 25E, isoform D OS=Drosophila melanogaster GN=Hel25E PE=1 SV=1;>sp|Q27268|DX39B_DROME ATP-dependent RNA helicase WM6 OS=Drosophila melanogaster GN=Hel25E PE=1 SV=1,>sp|Q27268|DX39B_DROME ATP-dependent RNA helicase WM6 OS=Drosophila melanogaster GN=Hel25E PE=1 SV=1	1	1
TRUE	Contr / Rep	Contr	Rep	6	Q9VYU9	33.4804	49.6728	0.569138	0.569138	48.3637	1.48364	0	0.284713	0.097126	5	0.382951	Q9VYU9	Q9VYU9_DROME	CG9360	CG9360	Q9VYU9	Drosophila melanogaster	tr		1	1	uniprot-drosophila_reviewed_unreviewed_0825_2016	>tr|Q9VYU9|Q9VYU9_DROME CG9360 OS=Drosophila melanogaster GN=CG9360 PE=1 SV=1	2	2
TRUE	Contr / Rep	Contr	Rep	12	Q9VEC2	14.8322	13.6959	-0.114981	0.114981	-7.66057	0.923394	0	0.284376	0.097126	11	0.146443	Q9VEC2	Q9VEC2_DROME	LP02120p	CG12321-RA	Q9VEC2	Drosophila melanogaster	tr		1	1	uniprot-drosophila_reviewed_unreviewed_0825_2016	>tr|Q9VEC2|Q9VEC2_DROME LP02120p OS=Drosophila melanogaster GN=CG12321-RA PE=1 SV=1	2	2
TRUE	Contr / Rep	Contr	Rep	18	A0A0B4JD57;A0A0B4JD95;Q59E58	50.5192	62.9289	0.31689	0.31689	24.5642	1.24564	0	0.2863	0.0975045	17	0.183467	A0A0B4JD57;A0A0B4JD95;Q59E58	A0A0B4JD57_DROME;A0A0B4JD95_DROME;Q59E58_DROME	Zipper, isoform F;Zipper, isoform H;Zipper, isoform C	zip	A0A0B4JD57;A0A0B4JD95;Q59E58	Drosophila melanogaster	tr		1	1	uniprot-drosophila_reviewed_unreviewed_0825_2016	>tr|A0A0B4JD57|A0A0B4JD57_DROME Zipper, isoform F OS=Drosophila melanogaster GN=zip PE=1 SV=1;>tr|A0A0B4JD95|A0A0B4JD95_DROME Zipper, isoform H OS=Drosophila melanogaster GN=zip PE=1 SV=1;>tr|Q59E58|Q59E58_DROME Zipper, isoform C OS=Drosophila melanogaster GN=zip PE=1 SV=1	4	4
TRUE	Contr / Rep	Contr	Rep	6	A0A0B4LGF8;B7YZP9;P53777	13057.1	12439.8	-0.0698719	0.0698719	-4.72774	0.952723	0	0.289808	0.0985348	5	0.0523013	A0A0B4LGF8;B7YZP9;P53777,P53777	A0A0B4LGF8_DROME;B7YZP9_DROME;MLP1_DROME,MLP1_DROME	Muscle LIM protein at 60A, isoform F;Muscle LIM protein at 60A, isoform B;Muscle LIM protein 1,Muscle LIM protein 1	Mlp60A	A0A0B4LGF8;B7YZP9;P53777,P53777	Drosophila melanogaster	tr;tr;sp,sp		1;1;2,2	1	uniprot-drosophila_reviewed_unreviewed_0825_2016	>tr|A0A0B4LGF8|A0A0B4LGF8_DROME Muscle LIM protein at 60A, isoform F OS=Drosophila melanogaster GN=Mlp60A PE=1 SV=1;>tr|B7YZP9|B7YZP9_DROME Muscle LIM protein at 60A, isoform B OS=Drosophila melanogaster GN=Mlp60A PE=1 SV=1;>sp|P53777|MLP1_DROME Muscle LIM protein 1 OS=Drosophila melanogaster GN=Mlp60A PE=2 SV=1,>sp|P53777|MLP1_DROME Muscle LIM protein 1 OS=Drosophila melanogaster GN=Mlp60A PE=2 …	1	1
TRUE	Contr / Rep	Contr	Rep	6	Q9VZ58	90.0045	80.4631	-0.16167	0.16167	-10.601	0.89399	0	0.290777	0.0986998	5	0.113158	Q9VZ58	Q9VZ58_DROME	Purple acid phosphatase	CG1637	Q9VZ58	Drosophila melanogaster	tr		1	1	uniprot-drosophila_reviewed_unreviewed_0825_2016	>tr|Q9VZ58|Q9VZ58_DROME Purple acid phosphatase OS=Drosophila melanogaster GN=CG1637 PE=1 SV=1	1	1
TRUE	Contr / Rep	Contr	Rep	6	A0A0B4K610	19.954	15.3417	-0.379217	0.379217	-23.1145	0.768855	0	0.293123	0.0991659	5	0.326925	A0A0B4K610	A0A0B4K610_DROME	CG8369, isoform B	CG8369	A0A0B4K610	Drosophila melanogaster	tr		1	1	uniprot-drosophila_reviewed_unreviewed_0825_2016	>tr|A0A0B4K610|A0A0B4K610_DROME CG8369, isoform B OS=Drosophila melanogaster GN=CG8369 PE=1 SV=1	1	1
TRUE	Contr / Rep	Contr	Rep	6	B0LQU2;C0IN41;E8NH57;M9PBV1;P17276;Q59E23	587.141	546.167	-0.104366	0.104366	-6.97865	0.930213	0	0.293087	0.0991659	5	0.072612	B0LQU2;C0IN41;E8NH57;M9PBV1;P17276,P17276;Q59E23	B0LQU2_DROME;C0IN41_DROME;E8NH57_DROME;M9PBV1_DROME;PH4H_DROME,PH4H_DROME;Q59E23_DROME	Henna mutant bp;Henna mutant pb;Henna, isoform D;Henna, isoform C;Protein henna,Protein henna;Henna, isoform B	Henna;Hn;Hn;Hn;Hn,Hn;Hn	B0LQU2;C0IN41;E8NH57;M9PBV1;P17276,P17276;Q59E23	Drosophila melanogaster	tr;tr;tr;tr;sp,sp;tr		2;2;1;1;2,2;1	1;1;1;1;3,3;1	uniprot-drosophila_reviewed_unreviewed_0825_2016	>tr|B0LQU2|B0LQU2_DROME Henna mutant bp OS=Drosophila melanogaster GN=Henna PE=2 SV=1;>tr|C0IN41|C0IN41_DROME Henna mutant pb OS=Drosophila melanogaster GN=Hn PE=2 SV=1;>tr|E8NH57|E8NH57_DROME Henna, isoform D OS=Drosophila melanogaster GN=Hn PE=1 SV=1;>tr|M9PBV1|M9PBV1_DROME Henna, isoform C OS=Drosophila melanogaster GN=Hn PE=1 SV=1;>sp|P17276|PH4H_DROME Protein henna OS=Drosophila melanogaster…	1	1
TRUE	Contr / Rep	Contr	Rep	12	Q9VBU9	2406.79	1183.2	-1.02442	1.02442	-50.8391	0.491609	0	0.294767	0.099557	11	0.260372	Q9VBU9	Q9VBU9_DROME	40S ribosomal protein S27	RpS27	Q9VBU9	Drosophila melanogaster	tr		1	1	uniprot-drosophila_reviewed_unreviewed_0825_2016	>tr|Q9VBU9|Q9VBU9_DROME 40S ribosomal protein S27 OS=Drosophila melanogaster GN=RpS27 PE=1 SV=1	2	2
TRUE	Contr / Rep	Contr	Rep	6	Q9Y1A3;X2JB87	25.1468	28.61	0.186143	0.186143	13.7718	1.13772	0	0.295533	0.0996507	5	0.198555	Q9Y1A3,Q9Y1A3;X2JB87	TIM8_DROME,TIM8_DROME;X2JB87_DROME	Mitochondrial import inner membrane translocase subunit Tim8,Mitochondrial import inner membrane translocase subunit Tim8;Tim8, isoform B	Tim8	Q9Y1A3,Q9Y1A3;X2JB87	Drosophila melanogaster	sp,sp;tr		3	1	uniprot-drosophila_reviewed_unreviewed_0825_2016	>sp|Q9Y1A3|TIM8_DROME Mitochondrial import inner membrane translocase subunit Tim8 OS=Drosophila melanogaster GN=Tim8 PE=3 SV=1,>sp|Q9Y1A3|TIM8_DROME Mitochondrial import inner membrane translocase subunit Tim8 OS=Drosophila melanogaster GN=Tim8 PE=3 SV=1;>tr|X2JB87|X2JB87_DROME Tim8, isoform B OS=Drosophila melanogaster GN=Tim8 PE=3 SV=1	1	1
TRUE	Contr / Rep	Contr	Rep	12	A0A0B4LGH1	61.9129	72.141	0.220579	0.220579	16.5201	1.1652	0	0.296027	0.0996526	11	0.139842	A0A0B4LGH1	A0A0B4LGH1_DROME	Beta-Tubulin at 60D, isoform B	betaTub60D	A0A0B4LGH1	Drosophila melanogaster	tr		1	1	uniprot-drosophila_reviewed_unreviewed_0825_2016	>tr|A0A0B4LGH1|A0A0B4LGH1_DROME Beta-Tubulin at 60D, isoform B OS=Drosophila melanogaster GN=betaTub60D PE=1 SV=1	2	2
TRUE	Contr / Rep	Contr	Rep	36	Q9VSP9	25981.2	26789.6	0.0442057	0.0442057	3.11153	1.03112	0	0.299613	0.100694	35	0.129692	Q9VSP9	Q9VSP9_DROME	CG5804	CG5804	Q9VSP9	Drosophila melanogaster	tr		1	1	uniprot-drosophila_reviewed_unreviewed_0825_2016	>tr|Q9VSP9|Q9VSP9_DROME CG5804 OS=Drosophila melanogaster GN=CG5804 PE=1 SV=1	6	6
TRUE	Contr / Rep	Contr	Rep	48	Q9I7J0	7967.47	6540.21	-0.284784	0.284784	-17.9136	0.820864	0	0.304462	0.102155	47	0.135214	Q9I7J0	Q9I7J0_DROME	CG5023	CG5023	Q9I7J0	Drosophila melanogaster	tr		1	1	uniprot-drosophila_reviewed_unreviewed_0825_2016	>tr|Q9I7J0|Q9I7J0_DROME CG5023 OS=Drosophila melanogaster GN=CG5023 PE=1 SV=1	7	8
TRUE	Contr / Rep	Contr	Rep	12	Q9VY87	1458.84	2530.51	0.794605	0.794605	73.4603	1.7346	0	0.311869	0.104468	11	0.559022	Q9VY87	Q9VY87_DROME	Cathepsin B1, isoform A	CtsB1	Q9VY87	Drosophila melanogaster	tr		1	1	uniprot-drosophila_reviewed_unreviewed_0825_2016	>tr|Q9VY87|Q9VY87_DROME Cathepsin B1, isoform A OS=Drosophila melanogaster GN=CtsB1 PE=1 SV=1	2	2
TRUE	Contr / Rep	Contr	Rep	50	Q9VF24	5460.28	4166.74	-0.390057	0.390057	-23.6901	0.763099	0	0.312873	0.104571	49	0.158034	Q9VF24	Q9VF24_DROME	Crossveinless d	cv-d	Q9VF24	Drosophila melanogaster	tr		1	2	uniprot-drosophila_reviewed_unreviewed_0825_2016	>tr|Q9VF24|Q9VF24_DROME Crossveinless d OS=Drosophila melanogaster GN=cv-d PE=1 SV=2	7	9
TRUE	Contr / Rep	Contr	Rep	26	Q8MT58	460.665	630.596	0.452999	0.452999	36.8883	1.36888	0	0.3132	0.104571	25	0.304616	Q8MT58	Q8MT58_DROME	RE11562p	CG17337	Q8MT58	Drosophila melanogaster	tr		1	1	uniprot-drosophila_reviewed_unreviewed_0825_2016	>tr|Q8MT58|Q8MT58_DROME RE11562p OS=Drosophila melanogaster GN=CG17337 PE=1 SV=1	5	6
TRUE	Contr / Rep	Contr	Rep	12	P23779	4307.65	3078.21	-0.48481	0.48481	-28.5409	0.714591	0	0.328385	0.109462	11	0.320897	P23779	CYTL_DROME	Cystatin-like protein	Cys	P23779	Drosophila melanogaster	sp		2	2	uniprot-drosophila_reviewed_unreviewed_0825_2016	>sp|P23779|CYTL_DROME Cystatin-like protein OS=Drosophila melanogaster GN=Cys PE=2 SV=2,>sp|P23779|CYTL_DROME Cystatin-like protein OS=Drosophila melanogaster GN=Cys PE=2 SV=2	2	2
TRUE	Contr / Rep	Contr	Rep	12	E8NH88;Q29R50;Q7KUX7;Q8IR13;Q9VXF8;X2JC79;X2JE34	313.659	279.186	-0.167969	0.167969	-10.9905	0.890095	0	0.331043	0.110168	11	0.228788	E8NH88;Q29R50;Q7KUX7;Q8IR13;Q9VXF8;X2JC79;X2JE34	E8NH88_DROME;Q29R50_DROME;Q7KUX7_DROME;Q8IR13_DROME;Q9VXF8_DROME;X2JC79_DROME;X2JE34_DROME	RE23444p (Fragment);RH12113p;FI04456p;RNA-binding protein 2, isoform B;RNA-binding protein 2, isoform A;RNA-binding protein 2, isoform D;RNA-binding protein 2, isoform E	Rbp2-RB;;Rbp2;Rbp2;Rbp2;Rbp2;Rbp2	E8NH88;Q29R50;Q7KUX7;Q8IR13;Q9VXF8;X2JC79;X2JE34	Drosophila melanogaster	tr		2;2;1;1;1;1;1	1	uniprot-drosophila_reviewed_unreviewed_0825_2016	>tr|E8NH88|E8NH88_DROME RE23444p (Fragment) OS=Drosophila melanogaster GN=Rbp2-RB PE=2 SV=1;>tr|Q29R50|Q29R50_DROME RH12113p OS=Drosophila melanogaster PE=2 SV=1;>tr|Q7KUX7|Q7KUX7_DROME FI04456p OS=Drosophila melanogaster GN=Rbp2 PE=1 SV=1;>tr|Q8IR13|Q8IR13_DROME RNA-binding protein 2, isoform B OS=Drosophila melanogaster GN=Rbp2 PE=1 SV=1;>tr|Q9VXF8|Q9VXF8_DROME RNA-binding protein 2, isoform A …	2	2
TRUE	Contr / Rep	Contr	Rep	36	Q8MST5;Q9VAX7	1045.52	857.486	-0.286043	0.286043	-17.9851	0.820149	0	0.333169	0.110566	35	0.103486	Q8MST5;Q9VAX7	Q8MST5_DROME;Q9VAX7_DROME	Beta-Tubulin at 97EF, isoform B;Beta-Tubulin at 97EF, isoform C	betaTub97EF	Q8MST5;Q9VAX7	Drosophila melanogaster	tr		1	1;3	uniprot-drosophila_reviewed_unreviewed_0825_2016	>tr|Q8MST5|Q8MST5_DROME Beta-Tubulin at 97EF, isoform B OS=Drosophila melanogaster GN=betaTub97EF PE=1 SV=1;>tr|Q9VAX7|Q9VAX7_DROME Beta-Tubulin at 97EF, isoform C OS=Drosophila melanogaster GN=betaTub97EF PE=1 SV=3	5	6
TRUE	Contr / Rep	Contr	Rep	6	B6IDM7;P48604	58.0151	62.4531	0.106347	0.106347	7.64988	1.0765	0	0.333324	0.110566	5	0.0919829	B6IDM7;P48604,P48604	B6IDM7_DROME;GRPE_DROME,GRPE_DROME	GrpE protein homolog;GrpE protein homolog, mitochondrial,GrpE protein homolog, mitochondrial	Roe1-RA;Roe1,Roe1	B6IDM7;P48604,P48604	Drosophila melanogaster	tr;sp,sp		2	1;2,2	uniprot-drosophila_reviewed_unreviewed_0825_2016	>tr|B6IDM7|B6IDM7_DROME GrpE protein homolog OS=Drosophila melanogaster GN=Roe1-RA PE=2 SV=1;>sp|P48604|GRPE_DROME GrpE protein homolog, mitochondrial OS=Drosophila melanogaster GN=Roe1 PE=2 SV=2,>sp|P48604|GRPE_DROME GrpE protein homolog, mitochondrial OS=Drosophila melanogaster GN=Roe1 PE=2 SV=2	1	1
TRUE	Contr / Rep	Contr	Rep	6	G7H7Z0;Q8SXM8;Q9W327	22.1081	19.3039	-0.195677	0.195677	-12.6837	0.873163	0	0.338126	0.111795	5	0.25066	G7H7Z0;Q8SXM8;Q9W327	G7H7Z0_DROME;Q8SXM8_DROME;Q9W327_DROME	Lysine--tRNA ligase	Aats-lys-RC;LysRS;LysRS	G7H7Z0;Q8SXM8;Q9W327	Drosophila melanogaster	tr		2;1;1	1;1;2	uniprot-drosophila_reviewed_unreviewed_0825_2016	>tr|G7H7Z0|G7H7Z0_DROME Lysine--tRNA ligase OS=Drosophila melanogaster GN=Aats-lys-RC PE=2 SV=1;>tr|Q8SXM8|Q8SXM8_DROME Lysine--tRNA ligase OS=Drosophila melanogaster GN=LysRS PE=1 SV=1;>tr|Q9W327|Q9W327_DROME Lysine--tRNA ligase OS=Drosophila melanogaster GN=LysRS PE=1 SV=2	1	1
TRUE	Contr / Rep	Contr	Rep	6	Q7KMP8	8.12403	8.46596	0.0594768	0.0594768	4.20878	1.04209	0	0.338069	0.111795	5	0.25711	Q7KMP8	Q7KMP8_DROME	26S proteasome regulatory complex subunit p39A	Rpn9	Q7KMP8	Drosophila melanogaster	tr		1	1	uniprot-drosophila_reviewed_unreviewed_0825_2016	>tr|Q7KMP8|Q7KMP8_DROME 26S proteasome regulatory complex subunit p39A OS=Drosophila melanogaster GN=Rpn9 PE=1 SV=1	1	1
TRUE	Contr / Rep	Contr	Rep	63	Q7KLW5;Q7KN94	18460.5	18035.5	-0.0335988	0.0335988	-2.30198	0.97698	0	0.344279	0.113646	62	0.0792704	Q7KLW5;Q7KN94	Q7KLW5_DROME;Q7KN94_DROME	LD07532p (Fragment);Walrus, isoform A	wal	Q7KLW5;Q7KN94	Drosophila melanogaster	tr		2;1	1	uniprot-drosophila_reviewed_unreviewed_0825_2016	>tr|Q7KLW5|Q7KLW5_DROME LD07532p (Fragment) OS=Drosophila melanogaster GN=wal PE=2 SV=1;>tr|Q7KN94|Q7KN94_DROME Walrus, isoform A OS=Drosophila melanogaster GN=wal PE=1 SV=1	9	11
TRUE	Contr / Rep	Contr	Rep	15	Q9VMR6	202.869	299.213	0.560627	0.560627	47.491	1.47491	0	0.344903	0.113668	14	0.177839	Q9VMR6	Q9VMR6_DROME	MIP06029p	CG12512-RA	Q9VMR6	Drosophila melanogaster	tr		1	1	uniprot-drosophila_reviewed_unreviewed_0825_2016	>tr|Q9VMR6|Q9VMR6_DROME MIP06029p OS=Drosophila melanogaster GN=CG12512-RA PE=1 SV=1	3	3
TRUE	Contr / Rep	Contr	Rep	6	C4NYP8;E2QD63;Q86DS1;Q8MSG4	87.4145	76.8197	-0.186397	0.186397	-12.1203	0.878797	0	0.34727	0.114263	5	0.239215	C4NYP8,C4NYP8;E2QD63;Q86DS1,Q86DS1;Q8MSG4	F10A1_DROME,F10A1_DROME;E2QD63_DROME;F10A2_DROME,F10A2_DROME;Q8MSG4_DROME	Hsc70-interacting protein 1,Hsc70-interacting protein 1;Hsc/Hsp70-interacting protein related, isoform B;Hsc70-interacting protein 2,Hsc70-interacting protein 2;GM09909p (Fragment)	HIP,HIP;HIP-R;HIP-R,HIP-R;CG2947	C4NYP8,C4NYP8;E2QD63;Q86DS1,Q86DS1;Q8MSG4	Drosophila melanogaster	sp,sp;tr;sp,sp;tr		1,1;4;1,1;2	2,2;1;2,2;1	uniprot-drosophila_reviewed_unreviewed_0825_2016	>sp|C4NYP8|F10A1_DROME Hsc70-interacting protein 1 OS=Drosophila melanogaster GN=HIP PE=1 SV=2,>sp|C4NYP8|F10A1_DROME Hsc70-interacting protein 1 OS=Drosophila melanogaster GN=HIP PE=1 SV=2;>tr|E2QD63|E2QD63_DROME Hsc/Hsp70-interacting protein related, isoform B OS=Drosophila melanogaster GN=HIP-R PE=4 SV=1;>sp|Q86DS1|F10A2_DROME Hsc70-interacting protein 2 OS=Drosophila melanogaster GN=HIP-R PE=…	1	1
TRUE	Contr / Rep	Contr	Rep	12	Q8SXV8;Q8SZM9;Q9VQR0	155.929	148.424	-0.0711601	0.0711601	-4.81277	0.951872	0	0.351292	0.1154	11	0.185932	Q8SXV8;Q8SZM9;Q9VQR0	Q8SXV8_DROME;Q8SZM9_DROME;Q9VQR0_DROME	RH63796p;RH02901p;CG3246	CG3246;CG3246;CG3246-RA	Q8SXV8;Q8SZM9;Q9VQR0	Drosophila melanogaster	tr		2;2;1	1	uniprot-drosophila_reviewed_unreviewed_0825_2016	>tr|Q8SXV8|Q8SXV8_DROME RH63796p OS=Drosophila melanogaster GN=CG3246 PE=2 SV=1;>tr|Q8SZM9|Q8SZM9_DROME RH02901p OS=Drosophila melanogaster GN=CG3246 PE=2 SV=1;>tr|Q9VQR0|Q9VQR0_DROME CG3246 OS=Drosophila melanogaster GN=CG3246-RA PE=1 SV=1	2	2
TRUE	Contr / Rep	Contr	Rep	12	M9PB90;Q9VKY2	65.5637	44.163	-0.570058	0.570058	-32.6411	0.673589	0	0.353457	0.115925	11	0.341858	M9PB90;Q9VKY2,Q9VKY2	M9PB90_DROME;CAND1_DROME,CAND1_DROME	Cullin-associated and neddylation-dissociated 1, isoform B;Cullin-associated NEDD8-dissociated protein 1,Cullin-associated NEDD8-dissociated protein 1	Cand1	M9PB90;Q9VKY2,Q9VKY2	Drosophila melanogaster	tr;sp,sp		1;2,2	1	uniprot-drosophila_reviewed_unreviewed_0825_2016	>tr|M9PB90|M9PB90_DROME Cullin-associated and neddylation-dissociated 1, isoform B OS=Drosophila melanogaster GN=Cand1 PE=1 SV=1;>sp|Q9VKY2|CAND1_DROME Cullin-associated NEDD8-dissociated protein 1 OS=Drosophila melanogaster GN=Cand1 PE=2 SV=1,>sp|Q9VKY2|CAND1_DROME Cullin-associated NEDD8-dissociated protein 1 OS=Drosophila melanogaster GN=Cand1 PE=2 SV=1	3	3
TRUE	Contr / Rep	Contr	Rep	12	A0A0B4K661;A0A0B4KG68;C1C3D3;P06754	687.205	568.908	-0.272546	0.272546	-17.2143	0.827857	0	0.358478	0.117383	11	0.16622	A0A0B4K661;A0A0B4KG68;C1C3D3;P06754,P06754	A0A0B4K661_DROME;A0A0B4KG68_DROME;C1C3D3_DROME;TPM1_DROME,TPM1_DROME	Tropomyosin 1, isoform Q;Tropomyosin 1, isoform R;MIP08601p;Tropomyosin-1, isoforms 9A/A/B,Tropomyosin-1, isoforms 9A/A/B	Tm1;Tm1;Tm1-RA;Tm1,Tm1	A0A0B4K661;A0A0B4KG68;C1C3D3;P06754,P06754	Drosophila melanogaster	tr;tr;tr;sp,sp		1;1;2;2,2	1;1;1;2,2	uniprot-drosophila_reviewed_unreviewed_0825_2016	>tr|A0A0B4K661|A0A0B4K661_DROME Tropomyosin 1, isoform Q OS=Drosophila melanogaster GN=Tm1 PE=1 SV=1;>tr|A0A0B4KG68|A0A0B4KG68_DROME Tropomyosin 1, isoform R OS=Drosophila melanogaster GN=Tm1 PE=1 SV=1;>tr|C1C3D3|C1C3D3_DROME MIP08601p OS=Drosophila melanogaster GN=Tm1-RA PE=2 SV=1;>sp|P06754|TPM1_DROME Tropomyosin-1, isoforms 9A/A/B OS=Drosophila melanogaster GN=Tm1 PE=2 SV=2,>sp|P06754|TPM1_DRO…	2	2
TRUE	Contr / Rep	Contr	Rep	54	Q9VNW6	6485.52	6338.36	-0.0331141	0.0331141	-2.26915	0.977308	0	0.360521	0.117786	53	0.120688	Q9VNW6	Q9VNW6_DROME	CG7470, isoform A	CG7470	Q9VNW6	Drosophila melanogaster	tr		1	1	uniprot-drosophila_reviewed_unreviewed_0825_2016	>tr|Q9VNW6|Q9VNW6_DROME CG7470, isoform A OS=Drosophila melanogaster GN=CG7470 PE=1 SV=1	9	9
TRUE	Contr / Rep	Contr	Rep	12	Q9VW26	65.5418	104.982	0.679651	0.679651	60.1752	1.60175	0	0.360864	0.117786	11	0.313423	Q9VW26	OAT_DROME	Ornithine aminotransferase, mitochondrial,Ornithine aminotransferase, mitochondrial	Oat	Q9VW26	Drosophila melanogaster	sp		2	1	uniprot-drosophila_reviewed_unreviewed_0825_2016	>sp|Q9VW26|OAT_DROME Ornithine aminotransferase, mitochondrial OS=Drosophila melanogaster GN=Oat PE=2 SV=1,>sp|Q9VW26|OAT_DROME Ornithine aminotransferase, mitochondrial OS=Drosophila melanogaster GN=Oat PE=2 SV=1	2	2
TRUE	Contr / Rep	Contr	Rep	12	Q9VHL2	41.7161	48.663	0.222221	0.222221	16.6528	1.16653	0	0.36611	0.119308	11	0.490976	Q9VHL2	Q9VHL2_DROME	LD47396p	Tcp-1eta	Q9VHL2	Drosophila melanogaster	tr		1	2	uniprot-drosophila_reviewed_unreviewed_0825_2016	>tr|Q9VHL2|Q9VHL2_DROME LD47396p OS=Drosophila melanogaster GN=Tcp-1eta PE=1 SV=2	2	2
TRUE	Contr / Rep	Contr	Rep	18	A0A0B4JD11;Q9NJH0	3861.28	3317.04	-0.219183	0.219183	-14.0948	0.859052	0	0.369846	0.120148	17	0.137174	A0A0B4JD11;Q9NJH0,Q9NJH0	A0A0B4JD11_DROME;EF1G_DROME,EF1G_DROME	Ef1gamma, isoform C;Elongation factor 1-gamma,Elongation factor 1-gamma	Ef1gamma	A0A0B4JD11;Q9NJH0,Q9NJH0	Drosophila melanogaster	tr;sp,sp		4;2,2	1;2,2	uniprot-drosophila_reviewed_unreviewed_0825_2016	>tr|A0A0B4JD11|A0A0B4JD11_DROME Ef1gamma, isoform C OS=Drosophila melanogaster GN=Ef1gamma PE=4 SV=1;>sp|Q9NJH0|EF1G_DROME Elongation factor 1-gamma OS=Drosophila melanogaster GN=Ef1gamma PE=2 SV=2,>sp|Q9NJH0|EF1G_DROME Elongation factor 1-gamma OS=Drosophila melanogaster GN=Ef1gamma PE=2 SV=2	2	4
TRUE	Contr / Rep	Contr	Rep	6	Q9V438	71.9909	64.7763	-0.152348	0.152348	-10.0215	0.899785	0	0.369869	0.120148	5	0.136822	Q9V438	Q9V438_DROME	Calcium-binding protein 1, isoform A	CaBP1	Q9V438	Drosophila melanogaster	tr		1	1	uniprot-drosophila_reviewed_unreviewed_0825_2016	>tr|Q9V438|Q9V438_DROME Calcium-binding protein 1, isoform A OS=Drosophila melanogaster GN=CaBP1 PE=1 SV=1	1	1
TRUE	Contr / Rep	Contr	Rep	12	Q29QT3;Q9VRP4	110.344	132.094	0.259563	0.259563	19.7116	1.19712	0	0.374595	0.12149	11	0.157649	Q29QT3;Q9VRP4	Q29QT3_DROME;Q9VRP4_DROME	IP11908p (Fragment);Bifunctional phosphopantetheine adenylyltransferase-Dephospho-CoA kinase	;Ppat-Dpck	Q29QT3;Q9VRP4	Drosophila melanogaster	tr		2;1	1;2	uniprot-drosophila_reviewed_unreviewed_0825_2016	>tr|Q29QT3|Q29QT3_DROME IP11908p (Fragment) OS=Drosophila melanogaster PE=2 SV=1;>tr|Q9VRP4|Q9VRP4_DROME Bifunctional phosphopantetheine adenylyltransferase-Dephospho-CoA kinase OS=Drosophila melanogaster GN=Ppat-Dpck PE=1 SV=2	2	2
TRUE	Contr / Rep	Contr	Rep	42	Q7KVX1;Q9W4H6	11810.5	12364.9	0.066176	0.066176	4.6938	1.04694	0	0.375914	0.121725	41	0.0805342	Q7KVX1;Q9W4H6	Q7KVX1_DROME;Q9W4H6_DROME	Pyruvate dehydrogenase E1 component subunit alpha	l(1)G0334	Q7KVX1;Q9W4H6	Drosophila melanogaster	tr		1	1;2	uniprot-drosophila_reviewed_unreviewed_0825_2016	>tr|Q7KVX1|Q7KVX1_DROME Pyruvate dehydrogenase E1 component subunit alpha OS=Drosophila melanogaster GN=l(1)G0334 PE=1 SV=1;>tr|Q9W4H6|Q9W4H6_DROME Pyruvate dehydrogenase E1 component subunit alpha OS=Drosophila melanogaster GN=l(1)G0334 PE=1 SV=2	7	7
TRUE	Contr / Rep	Contr	Rep	6	Q24324;X2JAZ3	25.6788	22.5566	-0.187025	0.187025	-12.1585	0.878415	0	0.377907	0.122018	5	0.204396	Q24324,Q24324;X2JAZ3	DSOR1_DROME,DSOR1_DROME;X2JAZ3_DROME	Dual specificity mitogen-activated protein kinase kinase dSOR1,Dual specificity mitogen-activated protein kinase kinase dSOR1;Downstream of raf1, isoform B	Dsor1	Q24324,Q24324;X2JAZ3	Drosophila melanogaster	sp,sp;tr		1,1;3	2,2;1	uniprot-drosophila_reviewed_unreviewed_0825_2016	>sp|Q24324|DSOR1_DROME Dual specificity mitogen-activated protein kinase kinase dSOR1 OS=Drosophila melanogaster GN=Dsor1 PE=1 SV=2,>sp|Q24324|DSOR1_DROME Dual specificity mitogen-activated protein kinase kinase dSOR1 OS=Drosophila melanogaster GN=Dsor1 PE=1 SV=2;>tr|X2JAZ3|X2JAZ3_DROME Downstream of raf1, isoform B OS=Drosophila melanogaster GN=Dsor1 PE=3 SV=1	1	1
TRUE	Contr / Rep	Contr	Rep	6	Q24062;X2J8B3	15.923	17.7987	0.160661	0.160661	11.7799	1.1178	0	0.378615	0.122018	5	0.171579	Q24062;X2J8B3	Q24062_DROME;X2J8B3_DROME	Black, isoform A;Black, isoform C	b	Q24062;X2J8B3	Drosophila melanogaster	tr		1	1	uniprot-drosophila_reviewed_unreviewed_0825_2016	>tr|Q24062|Q24062_DROME Black, isoform A OS=Drosophila melanogaster GN=b PE=1 SV=1;>tr|X2J8B3|X2J8B3_DROME Black, isoform C OS=Drosophila melanogaster GN=b PE=1 SV=1	1	1
TRUE	Contr / Rep	Contr	Rep	6	Q7K2G1	11.4551	14.0117	0.290632	0.290632	22.3176	1.22318	0	0.378093	0.122018	5	0.366544	Q7K2G1	ADRM1_DROME	Proteasomal ubiquitin receptor ADRM1 homolog	Rpn13	Q7K2G1	Drosophila melanogaster	sp		1	1	uniprot-drosophila_reviewed_unreviewed_0825_2016	>sp|Q7K2G1|ADRM1_DROME Proteasomal ubiquitin receptor ADRM1 homolog OS=Drosophila melanogaster GN=Rpn13 PE=1 SV=1,>sp|Q7K2G1|ADRM1_DROME Proteasomal ubiquitin receptor ADRM1 homolog OS=Drosophila melanogaster GN=Rpn13 PE=1 SV=1	1	1
TRUE	Contr / Rep	Contr	Rep	18	Q7JVH6	1269.73	1008.32	-0.332563	0.332563	-20.5876	0.794124	0	0.37934	0.122059	17	0.17066	Q7JVH6	Q7JVH6_DROME	CG9436	CG9436	Q7JVH6	Drosophila melanogaster	tr		1	1	uniprot-drosophila_reviewed_unreviewed_0825_2016	>tr|Q7JVH6|Q7JVH6_DROME CG9436 OS=Drosophila melanogaster GN=CG9436 PE=1 SV=1	3	3
TRUE	Contr / Rep	Contr	Rep	6	Q9W0M4	20.9846	62.6246	1.5774	1.5774	198.431	2.98431	0	0.380768	0.122326	5	0.936234	Q9W0M4	Q9W0M4_DROME	LP10861p	CG13887	Q9W0M4	Drosophila melanogaster	tr		1	1	uniprot-drosophila_reviewed_unreviewed_0825_2016	>tr|Q9W0M4|Q9W0M4_DROME LP10861p OS=Drosophila melanogaster GN=CG13887 PE=1 SV=1	1	1
TRUE	Contr / Rep	Contr	Rep	18	M9NFR5;O46173;Q95RE4	14.6836	10.477	-0.48698	0.48698	-28.6483	0.713517	0	0.385523	0.123553	17	0.231655	M9NFR5;O46173;Q95RE4	M9NFR5_DROME;O46173_DROME;Q95RE4_DROME	Ypsilon schachtel, isoform B;Y-box protein;LD37574p	yps	M9NFR5;O46173;Q95RE4	Drosophila melanogaster	tr		1;2;1	1	uniprot-drosophila_reviewed_unreviewed_0825_2016	>tr|M9NFR5|M9NFR5_DROME Ypsilon schachtel, isoform B OS=Drosophila melanogaster GN=yps PE=1 SV=1;>tr|O46173|O46173_DROME Y-box protein OS=Drosophila melanogaster GN=yps PE=2 SV=1;>tr|Q95RE4|Q95RE4_DROME LD37574p OS=Drosophila melanogaster GN=yps PE=1 SV=1	2	3
TRUE	Contr / Rep	Contr	Rep	6	Q7K738	37.0202	32.2707	-0.198087	0.198087	-12.8294	0.871706	0	0.385802	0.123553	5	0.166519	Q7K738	Q7K738_DROME	EG:52C10.4 protein	Ubc10	Q7K738	Drosophila melanogaster	tr		1	1	uniprot-drosophila_reviewed_unreviewed_0825_2016	>tr|Q7K738|Q7K738_DROME EG:52C10.4 protein OS=Drosophila melanogaster GN=Ubc10 PE=1 SV=1	1	1
TRUE	Contr / Rep	Contr	Rep	30	A0A0F6QCQ6;O46096;Q7K511	2849.77	3650.96	0.357433	0.357433	28.1144	1.28114	0	0.406456	0.129964	29	0.154471	A0A0F6QCQ6;O46096;Q7K511	A0A0F6QCQ6_DROME;O46096_DROME;Q7K511_DROME	CG3835-RA;CG3835-RA;CG3835, isoform A	CG3835;D2hgdh;D2hgdh	A0A0F6QCQ6;O46096;Q7K511	Drosophila melanogaster	tr		4;4;1	1	uniprot-drosophila_reviewed_unreviewed_0825_2016	>tr|A0A0F6QCQ6|A0A0F6QCQ6_DROME CG3835-RA OS=Drosophila melanogaster GN=CG3835 PE=4 SV=1;>tr|O46096|O46096_DROME CG3835-RA OS=Drosophila melanogaster GN=D2hgdh PE=4 SV=1;>tr|Q7K511|Q7K511_DROME CG3835, isoform A OS=Drosophila melanogaster GN=D2hgdh PE=1 SV=1	5	5
[truncated: 124 more rows]

## Sheet: 5b
5b. Enriched bioprocesses of proteins upregulated in nCLK-DN1 hemolymph
[truncated: 3,224 more rows]

## Sheet: 5c
5c. Enriched bioprocesses of proteins downregulated in nCLK-DN1 hemolymph
[truncated: 3,224 more rows]
