# Supplementary material for: Dietary restriction and clock delay eye aging to extend lifespan in D. melanogaster
Source: Research Square preprint supplement (doi:10.21203/rs.3.rs-428198/v1), 2021-05-21
Supplement: Supplementary file 4 [file a208e9db82a7e6f057cdd889.xlsx]

## Sheet: 2a
2a. Enriched biological processes for circadian genes in young heads from Kuintzle et al., 2017 (GSE81100)
TermID	Term	Enrichment	logP	Genes in Term	Target Genes in Term	Fraction of Targets in Term	Entrez Gene IDs	Gene Symbols
GO:0046034	ATP metabolic process	9.68515e-08	-16.1501	76	49	0.0607187	37946,45012,35590,39396,43582,33528,32740,32545,37466,43447,33852,39846,34925,41800,42808,43515,33744,44046,39950,42291,38154,33461,32586,35886,42759,36252,33351,43507,39143,36060,42620,45668,31190,37617,31950,31604,44228,44207,34996,46040,35279,46260,44390,32938,42591,43829,46069,41432,35728	ND-19,Vha68-2,SdhB,Adk1,Tpi,ND-B14.5B,ND-24,Gapdh2,ND-B12,Pglym78,ND-51,UQCR-C2,ND-B17,UQCR-C1,SdhD,CG7834,ND-13A,sun,UQCR-Q,ATPsynD,ND-ACP,Pgk,UQCR-14,Pgi,ATPsynCF6,wal,Eno,ATPsyngamma,ATPsynB,Pfk,PyK,Vha68-1,ND-B14.5A,blw,ATPsyndelta,ND-ASHI,ND-PDSW,ND-23,Cyt-c-p,cype,COX4,ND-SGDH,RFeSP,Pfrx,ND-42,ATPsynbeta,ATPsynG,COX5A,Gapdh1
GO:0006091	generation of precursor metabolites and energy	2.85289e-07	-15.0698	99	59	0.0731103	42620,31839,31190,37617,49580,42185,31604,44207,44228,43616,34996,39454,46040,34745,35761,35279,44390,46260,32938,43829,41823,43102,33524,42591,41432,35728,3771877,37946,35590,32740,43582,33528,37466,32545,34925,33386,39846,33852,39988,43447,41360,43515,42808,41800,34394,33744,39950,37804,39383,38154,31579,34089,33461,35886,32586,33351,36252,39899,36060	PyK,CG7766,ND-B14.5A,blw,Invadolysin,Mdh2,ND-ASHI,ND-23,ND-PDSW,aralar1,Cyt-c-p,Atg1,cype,CG6523,ACC,COX4,RFeSP,ND-SGDH,Pfrx,ATPsynbeta,GlyS,CG5028,FASN1,ND-42,COX5A,Gapdh1,Adh,ND-19,SdhB,ND-24,Tpi,ND-B14.5B,ND-B12,Gapdh2,ND-B17,GlyP,UQCR-C2,ND-51,CG7430,Pglym78,CG5214,CG7834,SdhD,UQCR-C1,CG5037,ND-13A,UQCR-Q,Taldo,Atg12,ND-ACP,kdn,Sirup,Pgk,Pgi,UQCR-14,Eno,wal,Nc73EF,Pfk
GO:0009150	purine ribonucleotide metabolic process	5.63411e-06	-12.0867	58	37	0.0458488	4.48614e+186	sdt,AdenoK,ATPsynD,ATPsynCF6,Pgi,Pgk,AMPdeam,ATPsyngamma,rut,Eno,Ady43A,Pfk,ATPsynB,scu,CG11089,Gapdh2,Tpi,Pde11,Pglym78,sun,wat,Adk2,CG1441,awd,CG17691,ATPsynbeta,Pfrx,Gapdh1,ATPsynG,PyK,pdgy,dlg1,ATPsyndelta,blw,ATPCL,Gycalpha99B,CG7920
GO:0009259	ribonucleotide metabolic process	5.63411e-06	-12.0867	58	37	0.0458488	4.34204e+186	wat,sun,Pde11,Pglym78,Tpi,Gapdh2,CG11089,scu,ATPsynB,Pfk,Ady43A,Eno,rut,AMPdeam,ATPsyngamma,Pgi,Pgk,ATPsynCF6,ATPsynD,AdenoK,sdt,CG7920,Gycalpha99B,ATPCL,ATPsyndelta,blw,dlg1,pdgy,PyK,ATPsynG,Gapdh1,Pfrx,ATPsynbeta,CG17691,awd,CG1441,Adk2
GO:0019693	ribose phosphate metabolic process	1.76927e-05	-10.9424	60	37	0.0458488	3.19504e+186	ATPsyndelta,blw,dlg1,pdgy,PyK,CG7920,Gycalpha99B,ATPCL,awd,CG1441,Adk2,ATPsynG,Gapdh1,Pfrx,CG17691,ATPsynbeta,Tpi,Gapdh2,CG11089,sun,wat,Pde11,Pglym78,Pgi,Pgk,ATPsynCF6,ATPsynD,AdenoK,sdt,scu,ATPsynB,Ady43A,Pfk,Eno,rut,ATPsyngamma,AMPdeam
GO:0006163	purine nucleotide metabolic process	1.76927e-05	-10.9424	60	37	0.0458488	3.67604e+186	ATPCL,Gycalpha99B,CG7920,PyK,pdgy,dlg1,blw,ATPsyndelta,CG17691,ATPsynbeta,Pfrx,Gapdh1,ATPsynG,Adk2,CG1441,awd,Pde11,Pglym78,wat,sun,CG11089,Gapdh2,Tpi,ATPsyngamma,AMPdeam,rut,Eno,Ady43A,Pfk,ATPsynB,scu,sdt,AdenoK,ATPsynD,ATPsynCF6,Pgi,Pgk
GO:0009132	nucleoside diphosphate metabolic process	2.10126e-05	-10.7704	16	14	0.0173482	4.26204e+69	PyK,sdt,Tpi,awd,Gapdh2,Pgi,Pgk,Adk2,dlg1,Pglym78,Eno,Pfrx,Pfk,Gapdh1
GO:0019637	organophosphate metabolic process	2.3859e-05	-10.6433	107	58	0.0718711	33203,32938,3355069,43829,33137,46069,35728,43739,35265,37834,36029,36760,31402,43493,43562,35417,42620,32426,37617,31950,32083,40468,33351,43507,32352,32406,41701,39143,3354921,32789,246656,44750,36060,43350,36405,39479,35671,42291,44861,37804,37707,42759,31376,35886,33461,43447,35107,32340,32909,34623,34063,44046,43420,42973,43991,38411,43582,32545	Pi3K21B,Pfrx,CG17691,ATPsynbeta,l(1)G0196,ATPsynG,Gapdh1,awd,fbp,Adk2,CG1441,ATPCL,CG3009,Gycalpha99B,CG7920,CG2201,PyK,pdgy,blw,ATPsyndelta,dlg1,laza,Eno,ATPsyngamma,AMPdeam,rut,Ipp,ATPsynB,Gfat1,scu,CG30503,Ady43A,Pfk,mino,Taz,AdenoK,Inos,ATPsynD,sdt,Taldo,CG3530,ATPsynCF6,norpA,Pgi,Pgk,Pglym78,Pde11,rdgB,CG7990,CG14945,CG7149,sun,wat,CG11089,Pten,CG12016,Tpi,Gapdh2
GO:0009135	purine nucleoside diphosphate metabolic process	5.33447e-05	-9.83874	15	13	0.016109	3.57284e+64	Gapdh1,Pfk,Pglym78,Pfrx,Eno,Tpi,Pgi,Gapdh2,Pgk,dlg1,Adk2,PyK,sdt
GO:0009179	purine ribonucleoside diphosphate metabolic process	5.33447e-05	-9.83874	15	13	0.016109	3.57284e+64	Gapdh1,Pfk,Pglym78,Pfrx,Eno,Gapdh2,Pgi,Pgk,dlg1,Adk2,Tpi,sdt,PyK
GO:0009185	ribonucleoside diphosphate metabolic process	5.33447e-05	-9.83874	15	13	0.016109	3.25453e+64	Gapdh2,Pgk,Pgi,Adk2,dlg1,Tpi,sdt,PyK,Gapdh1,Pfk,Pglym78,Pfrx,Eno
GO:0007005	mitochondrion organization	6.2999e-05	-9.67239	69	40	0.0495663	3.64053e+205	Taz,up,clu,Atg12,milt,Sirup,UQCR-14,Mitofilin,sra,Tom20,CG8206,CG11077,CG5676,porin,ND-B12,trp,larp,ref(2)P,Marf,UQCR-C2,UQCR-C1,Tim8,Pink1,Lon,Opa1,Hsc70-5,P5CDh1,CG34242,Miro,COX6B,Tim23,Tom40,Tim9a,Tim10,CG17996,CG34132,Tango9,ND-23,CG5903,CG10340
GO:0009117	nucleotide metabolic process	0.000118201	-9.04312	66	38	0.047088	3.94794e+191	AdenoK,ATPsynD,sdt,ATPsynCF6,Pgk,Pgi,Eno,AMPdeam,ATPsyngamma,rut,ATPsynB,scu,Ady43A,Pfk,CG11089,CG12016,Tpi,Gapdh2,Pde11,Pglym78,wat,sun,awd,Adk2,CG1441,Pfrx,ATPsynbeta,CG17691,ATPsynG,Gapdh1,PyK,pdgy,ATPsyndelta,blw,dlg1,ATPCL,Gycalpha99B,CG7920
GO:0006753	nucleoside phosphate metabolic process	0.000118201	-9.04312	66	38	0.047088	4.60694e+191	ATPsynG,Gapdh1,Pfrx,CG17691,ATPsynbeta,awd,Adk2,CG1441,Gycalpha99B,CG7920,ATPCL,blw,ATPsyndelta,dlg1,PyK,pdgy,ATPsynB,scu,Pfk,Ady43A,Eno,AMPdeam,ATPsyngamma,rut,ATPsynCF6,Pgk,Pgi,AdenoK,ATPsynD,sdt,sun,wat,Pde11,Pglym78,Tpi,CG12016,Gapdh2,CG11089
GO:0072521	purine-containing compound metabolic process	0.000129231	-8.95391	64	37	0.0458488	4.35624e+186	CG7920,Gycalpha99B,ATPCL,dlg1,blw,ATPsyndelta,pdgy,PyK,Gapdh1,ATPsynG,ATPsynbeta,CG17691,Pfrx,CG1441,Adk2,awd,wat,sun,Pde11,Pglym78,Gapdh2,Tpi,CG11089,Pfk,Ady43A,scu,ATPsynB,rut,AMPdeam,ATPsyngamma,Eno,Pgk,Pgi,ATPsynCF6,sdt,ATPsynD,AdenoK
GO:0055114	oxidation-reduction process	0.000142313	-8.85748	187	89	0.110285	39899,30995,37804,37217,32586,39988,41407,41800,43420,40633,37946,33421,37823,37466,35561,39391,43102,33524,41432,39336,34745,44207,36664,38746,41650,34996,34554,31190,36252,38378,32419,36060,326189,33883,38154,39383,41225,31579,34089,34925,33386,33852,39846,35543,39675,43515,42808,41360,33744,34394,39950,35590,3771877,42109,40946,42364,32740,33528,42832,32545,41823,42591,41706,38413,35728,38972,…	Nc73EF,CG17896,Taldo,CG7461,UQCR-14,CG7430,Ho,UQCR-C1,wat,Hph,ND-19,CG3609,Phm,ND-B12,Fmo-2,CG6910,CG5028,FASN1,COX5A,CG5946,CG6523,ND-23,Cyp6a20,ple,GILT1,Cyt-c-p,CG6287,ND-B14.5A,wal,ND-30,CG9512,Pfk,Adi1,Cpr,ND-ACP,Atg12,Mical,kdn,Sirup,ND-B17,GlyP,ND-51,UQCR-C2,Cyp6w1,Eip71CD,CG7834,SdhD,CG5214,ND-13A,CG5037,UQCR-Q,SdhB,Adh,Prx3,CG2767,Arc42,ND-24,ND-B14.5B,Gdh,Gapdh2,GlyS,ND-42,Cyp6d5,PHGPx,…
GO:0045333	cellular respiration	0.000181642	-8.61347	56	33	0.0408922	3.98994e+164	Nc73EF,ND-ACP,kdn,UQCR-14,Sirup,UQCR-C2,ND-51,CG7430,ND-B17,SdhD,CG5214,UQCR-C1,CG5037,ND-13A,UQCR-Q,ND-19,SdhB,ND-B14.5B,ND-24,ND-B12,CG5028,ND-42,COX5A,COX4,RFeSP,ND-SGDH,ND-PDSW,ND-23,aralar1,cype,ND-B14.5A,Mdh2,ND-ASHI
GO:0015980	energy derivation by oxidation of organic compounds	0.000227913	-8.38654	72	40	0.0495663	3.99883e+199	CG7430,ND-51,GlyP,UQCR-C2,ND-B17,CG5214,SdhD,UQCR-C1,ND-13A,CG5037,UQCR-Q,ND-19,SdhB,ND-B14.5B,ND-24,ND-B12,Nc73EF,ND-ACP,Atg12,kdn,Sirup,UQCR-14,ND-PDSW,ND-23,aralar1,Atg1,cype,CG7766,ND-B14.5A,Mdh2,ND-ASHI,GlyS,CG5028,FASN1,ND-42,COX5A,ACC,COX4,RFeSP,ND-SGDH
GO:0022900	electron transport chain	0.000315904	-8.06007	55	32	0.039653	3.52794e+159	COX4,RFeSP,ND-SGDH,CG6523,COX5A,ND-42,blw,Invadolysin,ND-ASHI,ND-B14.5A,Cyt-c-p,cype,ND-PDSW,ND-23,aralar1,ND-ACP,UQCR-14,wal,ND-24,ND-B14.5B,ND-B12,SdhB,ND-19,ND-13A,UQCR-Q,ND-B17,UQCR-C2,CG7430,ND-51,CG7834,SdhD,UQCR-C1
GO:0007602	phototransduction	0.000315965	-8.05988	40	25	0.0309789	4.23983e+126	Rh3,norpA,Itp-r83A,inaD,Gbeta76C,rtp,laza,trpl,Inx3,shakB,porin,santa-maria,Arr2,ninaC,cry,Rh4,Calx,pinta,stmA,ninaA,Gycalpha99B,Gprk1,inaC,trp,rdgB
GO:0006165	nucleoside diphosphate phosphorylation	0.000333601	-8.00557	13	11	0.0136307	4.34473e+54	Pglym78,Eno,Pfrx,Gapdh1,Pfk,PyK,Tpi,awd,Pgi,Gapdh2,Pgk
GO:0046031	ADP metabolic process	0.000333601	-8.00557	13	11	0.0136307	3.29383e+54	Pfrx,Eno,Pglym78,Gapdh1,Pfk,PyK,Tpi,Adk2,Pgi,Gapdh2,Pgk
GO:0046939	nucleotide phosphorylation	0.000333601	-8.00557	13	11	0.0136307	3.33513e+54	Eno,Pfrx,Pglym78,Pfk,Gapdh1,PyK,awd,Tpi,Gapdh2,Pgk,Pgi
GO:0016052	carbohydrate catabolic process	0.000364185	-7.91785	26	18	0.0223048	3.94543e+89	Atg1,Galt,GlyP,Pglym78,Gapdh2,Tpi,PyK,Pfk,Gapdh1,beta-Man,CG6910,GlyS,Eno,Pfrx,Pgk,Pgi,Atg12,Treh
GO:0009416	response to light stimulus	0.000398563	-7.82765	78	42	0.0520446	4.06274e+213	rtp,laza,Camta,Dyrk2,mts,norpA,14-3-3epsilon,Clk,cu,ninaA,inaC,trp,rdgB,CG17059,inaF-B,Arr2,ninaC,santa-maria,Ih,porin,Rh4,tim,Calx,pinta,Vha100-1,Timp,trpl,Rh3,Itp-r83A,Gbeta76C,inaD,Ekar,Gycalpha99B,Gprk1,alph,Tsp42Ej,shakB,Inx3,cry,dlg1,stmA,PIP82
GO:0009314	response to radiation	0.000458824	-7.68684	83	44	0.0545229	36057,36003,43442,41248,40664,40148,37629,43806,42398,3355013,43481,42428,43493,35865,31791,35620,33062,44266,42305,32083,40468,35974,40627,38872,41339,34831,45959,31376,42186,43542,36897,50227,32340,33271,42481,42635,34012,8674114,38993,34024,36589,34500,39887,33571	Jra,trpl,Vha100-1,Timp,Itp-r83A,Gbeta76C,inaD,Ekar,Rh3,Gprk1,alph,Stat92E,Gycalpha99B,stmA,PIP82,Tsp42Ej,shakB,Inx3,cry,dlg1,laza,Camta,rtp,Clk,cu,Dyrk2,mts,norpA,14-3-3epsilon,trp,inaC,CG17059,rdgB,ninaA,Calx,pinta,ninaC,inaF-B,Arr2,santa-maria,Ih,porin,Rh4,tim
GO:0009583	detection of light stimulus	0.000545038	-7.51466	41	25	0.0309789	4.04684e+126	laza,trpl,rtp,Itp-r83A,inaD,Gbeta76C,Rh3,norpA,trp,inaC,Gprk1,rdgB,ninaA,Gycalpha99B,Calx,pinta,stmA,ninaC,Arr2,santa-maria,shakB,Inx3,porin,Rh4,cry
GO:0006757	ATP generation from ADP	0.000819406	-7.10693	12	10	0.0123916	4.26204e+49	PyK,Tpi,Gapdh2,Pgi,Pgk,Pglym78,Pfrx,Eno,Gapdh1,Pfk
GO:0006096	glycolytic process	0.000819406	-7.10693	12	10	0.0123916	3.33513e+49	Eno,Pfrx,Pglym78,Pfk,Gapdh1,PyK,Tpi,Pgi,Gapdh2,Pgk
GO:0055086	nucleobase-containing small molecule metabolic process	0.000898374	-7.01492	78	41	0.0508055	3.67604e+208	ATPCL,CG7920,Gycalpha99B,pdgy,PyK,dlg1,blw,ATPsyndelta,CG17691,ATPsynbeta,Pfrx,Gapdh1,ATPsynG,CG1441,Adk2,awd,Pde11,Pglym78,wat,sun,Adk1,CG11089,Gapdh2,CG12016,Tpi,rut,AMPdeam,ATPsyngamma,Eno,Ady43A,Pfk,CG17896,scu,ATPsynB,Gfat1,sdt,ATPsynD,AdenoK,Pgk,Pgi,ATPsynCF6
GO:1901135	carbohydrate derivative metabolic process	0.001076	-6.83451	107	53	0.0656753	36760,38528,43493,43562,42620,32426,31957,2768916,31950,37617,32083,32938,43829,3355069,46069,35728,43739,35265,37834,33914,36029,35107,43447,32909,41913,33271,43420,44046,42973,38411,43582,32545,33351,43507,32352,32406,3354921,39143,34282,32789,44750,36060,40524,43350,39479,42291,44861,37804,34979,42759,40745,33461,35886	ATPCL,Hexo1,Gycalpha99B,CG7920,PyK,pdgy,alpha-Man-Ia,CG33303,ATPsyndelta,blw,dlg1,Pfrx,ATPsynbeta,CG17691,ATPsynG,Gapdh1,awd,fbp,Adk2,CG31637,CG1441,Pde11,Pglym78,CG7990,alpha-Man-IIb,ninaA,wat,sun,CG11089,CG12016,Tpi,Gapdh2,Eno,ATPsyngamma,AMPdeam,rut,Gfat1,ATPsynB,GlcAT-S,scu,Ady43A,Pfk,beta-Man,mino,AdenoK,ATPsynD,sdt,Taldo,Idgf2,ATPsynCF6,Gasp,Pgk,Pgi
GO:0006119	oxidative phosphorylation	0.00111156	-6.80199	49	28	0.0346964	4.14324e+139	COX5A,wal,ATPsynbeta,ND-42,COX4,ND-ACP,RFeSP,UQCR-14,ND-SGDH,ND-13A,Cyt-c-p,UQCR-Q,cype,ND-51,UQCR-C2,ND-PDSW,ND-B17,ND-23,SdhD,CG7834,UQCR-C1,ND-B14.5B,ND-24,ND-B12,ND-ASHI,SdhB,ND-19,ND-B14.5A
GO:0016063	rhodopsin biosynthetic process	0.00136312	-6.59798	9	8	0.00991326	4.26354e+39	pinta,rdhB,santa-maria,Cnx99A,alpha-Man-IIb,Hexo1,PAPLA1,ninaA
GO:0046154	rhodopsin metabolic process	0.00136312	-6.59798	9	8	0.00991326	4.46433e+39	Cnx99A,santa-maria,pinta,rdhB,alpha-Man-IIb,Hexo1,PAPLA1,ninaA
GO:0009581	detection of external stimulus	0.0014596	-6.52959	43	25	0.0309789	4.01484e+126	Gbeta76C,inaD,Itp-r83A,norpA,Rh3,trpl,laza,rtp,stmA,pinta,Calx,cry,Rh4,santa-maria,ninaC,Arr2,porin,Inx3,shakB,rdgB,trp,inaC,Gprk1,Gycalpha99B,ninaA
GO:0009582	detection of abiotic stimulus	0.0014596	-6.52959	43	25	0.0309789	3.60034e+126	trpl,laza,rtp,Gbeta76C,inaD,Itp-r83A,norpA,Rh3,rdgB,Gprk1,inaC,trp,Gycalpha99B,ninaA,pinta,stmA,Calx,Rh4,cry,shakB,Inx3,porin,santa-maria,Arr2,ninaC
GO:0050766	positive regulation of phagocytosis	0.00181005	-6.3144	6	6	0.00743494	3.63813e+29	ClC-b,tim,Rel,CaBP1,prtp,drpr
GO:0071482	cellular response to light stimulus	0.00250304	-5.99025	29	18	0.0223048	3.13764e+89	norpA,Rh3,inaD,Gbeta76C,Ekar,Gycalpha99B,CG17059,rdgB,inaC,trp,Rh4,cry,tim,ninaC,Arr2,Tsp42Ej,Ih,PIP82
GO:0042775	mitochondrial ATP synthesis coupled electron transport	0.00250581	-5.98914	42	24	0.0297398	3.38524e+119	ND-51,UQCR-C2,ND-B17,ND-PDSW,ND-23,SdhD,UQCR-C1,ND-13A,UQCR-Q,cype,SdhB,ND-19,ND-B14.5A,ND-B14.5B,ND-24,ND-ASHI,ND-B12,ND-42,COX5A,ND-ACP,COX4,RFeSP,ND-SGDH,UQCR-14
GO:0016059	deactivation of rhodopsin mediated signaling	0.00273622	-5.90118	15	11	0.0136307	3.89933e+56	Arr2,ninaC,norpA,Gbeta76C,inaD,Fbxl4,Arr1,inaC,Gprk1,Camta,rdgB
GO:0022400	regulation of rhodopsin mediated signaling pathway	0.00273622	-5.90118	15	11	0.0136307	3.13763e+56	norpA,ninaC,Arr2,Fbxl4,inaD,Gbeta76C,Arr1,rdgB,Gprk1,Camta,inaC
GO:0104004	cellular response to environmental stimulus	0.0032986	-5.71426	36	21	0.0260223	3.17913e+104	PIP82,tim,cry,Rh4,Ih,ninaC,Tsp42Ej,Arr2,CG17059,Stat92E,rdgB,kcc,inaC,trp,Gycalpha99B,Ekar,inaD,Gbeta76C,norpA,Rh3,GABA-B-R2
GO:0071214	cellular response to abiotic stimulus	0.0032986	-5.71426	36	21	0.0260223	4.38064e+104	Ekar,inaD,Gbeta76C,norpA,GABA-B-R2,Rh3,rdgB,CG17059,Stat92E,kcc,trp,inaC,Gycalpha99B,PIP82,tim,Rh4,cry,Ih,Arr2,Tsp42Ej,ninaC
GO:0022904	respiratory electron transport chain	0.00345747	-5.66722	45	25	0.0309789	3.16044e+124	ND-ASHI,ND-B12,ND-24,ND-B14.5B,ND-B14.5A,ND-19,SdhB,cype,UQCR-Q,ND-13A,UQCR-C1,aralar1,SdhD,ND-51,UQCR-C2,ND-PDSW,ND-B17,ND-23,ND-SGDH,UQCR-14,RFeSP,COX4,ND-ACP,COX5A,ND-42
GO:0051606	detection of stimulus	0.00345747	-5.66722	45	25	0.0309789	4.24814e+126	Calx,pinta,stmA,shakB,porin,Inx3,ninaC,santa-maria,Arr2,Rh4,cry,Gprk1,trp,inaC,rdgB,ninaA,Gycalpha99B,Itp-r83A,Gbeta76C,inaD,Rh3,norpA,laza,trpl,rtp
GO:0050764	regulation of phagocytosis	0.00350662	-5.6531	8	7	0.0086741	3.21244e+34	prtp,drpr,CaBP1,Rel,tim,crq,ClC-b
GO:0009260	ribonucleotide biosynthetic process	0.00359889	-5.62713	34	20	0.0247831	4.60694e+101	ATPsynG,ATPsynB,Ady43A,rut,CG17691,ATPsyngamma,ATPsynbeta,AMPdeam,awd,ATPsynCF6,Adk2,ATPsynD,AdenoK,sun,Gycalpha99B,ATPCL,ATPsyndelta,blw,pdgy,CG11089
GO:0009152	purine ribonucleotide biosynthetic process	0.00359889	-5.62713	34	20	0.0247831	4.40464e+101	sun,Gycalpha99B,ATPCL,blw,ATPsyndelta,pdgy,CG11089,ATPsynG,ATPsynB,Ady43A,rut,CG17691,ATPsyngamma,AMPdeam,ATPsynbeta,awd,Adk2,ATPsynCF6,ATPsynD,AdenoK
GO:0042773	ATP synthesis coupled electron transport	0.00382734	-5.56559	43	24	0.0297398	3.11904e+119	ND-B14.5A,ND-19,SdhB,ND-ASHI,ND-B12,ND-24,ND-B14.5B,SdhD,UQCR-C1,ND-B17,ND-23,ND-PDSW,ND-51,UQCR-C2,UQCR-Q,cype,ND-13A,RFeSP,ND-SGDH,UQCR-14,COX4,ND-ACP,ND-42,COX5A
GO:0071478	cellular response to radiation	0.0039149	-5.54296	32	19	0.023544	3.13764e+94	norpA,Rh3,inaD,Gbeta76C,Ekar,Gycalpha99B,CG17059,Stat92E,rdgB,inaC,trp,Rh4,cry,tim,Arr2,Tsp42Ej,ninaC,Ih,PIP82
GO:0016310	phosphorylation	0.00417279	-5.47917	165	74	0.0916976	35950,42358,43814,38154,38017,35886,33351,36252,44039,36060,38369,35590,32740,33528,43582,38411,32545,33852,34925,39846,43447,42808,43515,33744,39950,40958,35279,44390,46260,32938,42591,38890,39733,42836,35728,35417,31604,44228,38831,44096,39454,46040,34831,32586,33461,48448,41701,41118,37946,34012,38059,37466,36897,41800,31607,2768852,40292,42784,48311,34038,43739,43904,36057,33203,35970,43829,4…	Pkn,Ire1,bt,ND-ACP,Pdk1,Pgi,Eno,wal,Pak,Pfk,CG11486,SdhB,ND-24,ND-B14.5B,Tpi,CG12016,Gapdh2,ND-51,ND-B17,UQCR-C2,Pglym78,SdhD,CG7834,ND-13A,UQCR-Q,puc,COX4,RFeSP,ND-SGDH,Pfrx,ND-42,nmo,Pka-C3,CG31140,Gapdh1,CG2201,ND-ASHI,ND-PDSW,Rac2,wit,Atg1,cype,Dyrk2,UQCR-14,Pgk,CkIIalpha,Ipp,FER,ND-19,ninaC,Ptpmeg,ND-B12,inaC,UQCR-C1,Pink1,par-1,Pitslre,CG31145,Pkc53E,Slob,awd,AMPKalpha,Jra,Pi3K21B,Pdk,ATPsy…
GO:0006066	alcohol metabolic process	0.00457975	-5.38611	28	17	0.0210657	3.31374e+86	l(1)G0196,Ipp,CG5028,CG6910,CG7675,scu,Idh,Inos,norpA,Pdh,Marf,CG12116,Pu,Adh,Pten,pr,Tpi
GO:0035039	male pronucleus assembly	0.00519543	-5.25998	5	5	0.00619579	4.73844e+24	sra,Nph,Nap1,Nlp,mamo
GO:0019752	carboxylic acid metabolic process	0.00532242	-5.23583	101	48	0.0594796	37415,32426,34554,42620,42655,36782,37166,36760,38746,39860,33532,35761,44291,32381,326148,40241,41275,40434,43102,3355069,36040,32938,35970,35728,32297,40633,32545,44117,42832,43582,42364,43447,39675,39988,40155,326189,33461,35886,38154,36252,33351,43350,40268,38484,36060,40056,30995,32789	Pu,pdgy,CG6287,PyK,CG5326,Got1,CG15093,ATPCL,ple,Baldspot,Hydr2,ACC,Idh,CG1461,CG31523,CG5618,CG14688,P5CDh1,CG5028,CG17691,TER94,Pfrx,Pdk,Gapdh1,CG1673,Hph,Gapdh2,bgm,Gdh,Tpi,Arc42,Pglym78,Eip71CD,CG7430,SREBP,Adi1,Pgk,Pgi,ND-ACP,wal,Eno,mino,CG5955,Gad1,Pfk,CG3961,CG17896,scu
GO:0048066	developmental pigmentation	0.0057913	-5.1514	20	13	0.016109	3.41093e+64	PAPLA1,ninaA,Hexo1,alpha-Man-IIb,ple,santa-maria,t,Cnx99A,cl,se,rdhB,Pu,pinta
GO:0043473	pigmentation	0.0057913	-5.1514	20	13	0.016109	3.89733e+64	se,santa-maria,t,Cnx99A,cl,pinta,Pu,rdhB,ninaA,Hexo1,alpha-Man-IIb,PAPLA1,ple
GO:0070585	protein localization to mitochondrion	0.00587318	-5.13736	14	10	0.0123916	4.01893e+53	Tom20,CG8206,Tim8,Tim23,Tom40,Tim9a,CG34132,UQCR-C2,UQCR-C1,Tim10
GO:0072655	establishment of protein localization to mitochondrion	0.00587318	-5.13736	14	10	0.0123916	3.74784e+53	Tim10,CG34132,UQCR-C2,UQCR-C1,CG8206,Tom20,Tim8,Tim23,Tom40,Tim9a
GO:0006626	protein targeting to mitochondrion	0.00587318	-5.13736	14	10	0.0123916	3.74784e+53	Tim10,UQCR-C1,CG34132,UQCR-C2,Tom40,Tim9a,Tom20,CG8206,Tim8,Tim23
GO:0019318	hexose metabolic process	0.00587318	-5.13736	14	10	0.0123916	3.58863e+49	Pgi,Pgk,Gapdh2,Tpi,fbp,Pfk,Gapdh1,alpha-Man-IIb,Galt,Pfrx
GO:0032787	monocarboxylic acid metabolic process	0.00661807	-5.01795	56	29	0.0359356	3.24264e+145	pdgy,PyK,CG5326,Tpi,Arc42,Gapdh2,bgm,Pglym78,ATPCL,Baldspot,Hydr2,SREBP,CG31523,ACC,ND-ACP,Pgk,CG14688,Pgi,TER94,wal,Eno,Pdk,Pfrx,scu,Gad1,mino,Pfk,CG3961,Gapdh1
GO:0043436	oxoacid metabolic process	0.00674119	-4.99952	102	48	0.0594796	39988,39675,43447,44117,32545,43582,42364,42832,40633,30995,40056,36060,43350,38484,40268,32789,33351,36252,35886,33461,38154,326189,40155,33532,39860,37166,36782,38746,36760,42655,37415,42620,34554,32426,32297,35728,3355069,43102,35970,32938,36040,41275,40434,44291,35761,40241,32381,326148	CG7430,Eip71CD,Pglym78,bgm,Gapdh2,Tpi,Arc42,Gdh,Hph,CG17896,CG3961,Pfk,mino,Gad1,CG5955,scu,Eno,wal,Pgi,Pgk,ND-ACP,Adi1,SREBP,Hydr2,Baldspot,CG15093,Got1,ple,ATPCL,CG5326,Pu,PyK,CG6287,pdgy,CG1673,Gapdh1,CG17691,CG5028,Pdk,Pfrx,TER94,CG14688,P5CDh1,Idh,ACC,CG5618,CG1461,CG31523
GO:0006082	organic acid metabolic process	0.00674119	-4.99952	102	48	0.0594796	33461,35886,38154,326189,40155,36060,40056,30995,40268,43350,38484,32789,33351,36252,44117,32545,42364,43582,42832,40633,39988,43447,39675,41275,40434,44291,35761,40241,326148,32381,32297,35728,43102,3355069,32938,35970,36040,42655,37415,42620,32426,34554,33532,39860,37166,36782,36760,38746	Pgk,Pgi,ND-ACP,Adi1,SREBP,Pfk,CG3961,CG17896,CG5955,mino,Gad1,scu,Eno,wal,bgm,Gapdh2,Arc42,Tpi,Gdh,Hph,CG7430,Pglym78,Eip71CD,CG14688,P5CDh1,Idh,ACC,CG5618,CG31523,CG1461,CG1673,Gapdh1,CG5028,CG17691,Pfrx,Pdk,TER94,CG5326,Pu,PyK,pdgy,CG6287,Hydr2,Baldspot,CG15093,Got1,ATPCL,ple
GO:0090407	organophosphate biosynthetic process	0.00810516	-4.81525	59	30	0.0371747	3.24063e+151	rut,l(1)G0196,CG17691,AMPdeam,ATPsynbeta,ATPsyngamma,ATPsynG,ATPsynB,mino,Ady43A,Inos,ATPsynD,AdenoK,Taz,awd,norpA,ATPsynCF6,Adk2,ATPCL,CG7990,CG7149,sun,Gycalpha99B,pdgy,CG11089,CG2201,Tpi,blw,ATPsyndelta,CG12016
GO:0006164	purine nucleotide biosynthetic process	0.00867228	-4.74762	36	20	0.0247831	3.76173e+101	blw,ATPsyndelta,pdgy,CG11089,sun,Gycalpha99B,ATPCL,Adk2,ATPsynCF6,awd,ATPsynD,AdenoK,Ady43A,ATPsynG,ATPsynB,rut,ATPsyngamma,CG17691,AMPdeam,ATPsynbeta
GO:0046390	ribose phosphate biosynthetic process	0.00867228	-4.74762	36	20	0.0247831	3.24064e+101	rut,ATPsynbeta,ATPsyngamma,CG17691,AMPdeam,Ady43A,ATPsynG,ATPsynB,ATPsynD,AdenoK,ATPsynCF6,Adk2,awd,ATPCL,sun,Gycalpha99B,pdgy,CG11089,blw,ATPsyndelta
GO:0006458	'de novo' protein folding	0.00888978	-4.72285	7	6	0.00743494	3.86434e+29	DnaJ-1,Hsc70-5,ninaA,Hsc70-4,CG3061,CG11267
GO:0001895	retina homeostasis	0.00888978	-4.72285	7	6	0.00743494	4.35423e+29	trp,norpA,ninaC,Arr2,Arr1,Cnx99A
GO:0009628	response to abiotic stimulus	0.00905281	-4.70468	159	70	0.086741	41776,45668,35865,35620,31459,32083,3355013,38746,43481,42428,43493,40664,43806,36583,42398,32817,36057,36003,40633,42481,42635,34012,8674114,38993,38059,33571,39887,38870,36897,32340,33271,31228,45959,42561,34831,42186,34181,35974,32406,40627,44936,31791,44266,33062,42305,41852,40148,37629,41840,43442,38890,41248,44978,34500,43582,36589,34024,37800,43542,50227,46015,41339,38872,38643,31376,40468…	l(3)L1231,Vha68-1,stmA,Tsp42Ej,spoon,dlg1,Gprk1,ple,alph,Stat92E,Gycalpha99B,Itp-r83A,Ekar,Hsc70-5,Rh3,CrebB,Jra,trpl,Hph,Calx,pinta,ninaC,inaF-B,Arr2,Ptpmeg,tim,Rh4,CG7409,inaC,rdgB,ninaA,tko,mts,GABA-B-R2,Dyrk2,14-3-3epsilon,Dh31,Camta,rut,rtp,Eip93F,PIP82,Inx3,shakB,cry,Tm1,Gbeta76C,inaD,Hsc70-4,Vha100-1,nmo,Timp,Tom40,porin,Tpi,Ih,santa-maria,kcc,trp,CG17059,tutl,cu,Clk,DnaJ-1,norpA,laza,h,wt…
GO:0005975	carbohydrate metabolic process	0.00959426	-4.64659	74	36	0.0446097	4.34473e+180	Pglym78,GlyP,alpha-Man-IIb,Pten,GCS2alpha,Tpi,Gapdh2,Eno,Ipp,beta-Man,Pfk,Inos,Taldo,Imp,Idgf2,Atg12,Pgi,Pgk,kdn,Galt,Hexo1,CG13937,Atg1,CG7766,PyK,Mdh2,Pfrx,l(1)G0196,FASN1,GlyS,CG6910,Rheb,Gapdh1,ACC,Treh,fbp
GO:0006120	mitochondrial electron transport, NADH to ubiquinone	0.00966924	-4.63881	23	14	0.0173482	3.81543e+69	ND-ACP,ND-24,ND-B14.5B,ND-ASHI,ND-B12,ND-SGDH,ND-19,ND-B14.5A,ND-13A,ND-PDSW,ND-B17,ND-23,ND-51,ND-42
GO:0009642	response to light intensity	0.0110089	-4.50905	9	7	0.0086741	4.04684e+34	laza,inaC,Ekar,Ih,Tsp42Ej,Arr2,ninaC
GO:0009566	fertilization	0.0110089	-4.50905	9	7	0.0086741	4.35604e+34	Nlp,tacc,mamo,sra,CG14687,Nap1,Nph
GO:0006006	glucose metabolic process	0.0110089	-4.50905	9	7	0.0086741	3.25454e+34	Gapdh2,Pgi,Pgk,Gapdh1,Pfk,Tpi,fbp
GO:0007338	single fertilization	0.0110089	-4.50905	9	7	0.0086741	4.35604e+34	Nlp,tacc,mamo,CG14687,sra,Nap1,Nph
GO:0007603	phototransduction, visible light	0.0110958	-4.50119	19	12	0.0148699	3.13764e+61	norpA,Inx3,ninaC,Arr2,Gbeta76C,Gycalpha99B,ninaA,rdgB,trpl,Gprk1,trp,inaC
GO:0008277	regulation of G protein-coupled receptor signaling pathway	0.0110958	-4.50119	19	12	0.0148699	3.23404e+61	rdgB,Camta,Gprk1,inaC,sun,Arr1,Gbeta76C,Fbxl4,inaD,norpA,Arr2,ninaC
GO:0048069	eye pigmentation	0.0117032	-4.44789	17	11	0.0136307	4.19133e+54	alpha-Man-IIb,ninaA,Hexo1,PAPLA1,Cnx99A,cl,santa-maria,se,rdhB,pinta,Pu
GO:0034754	cellular hormone metabolic process	0.0120208	-4.42112	11	8	0.00991326	3.64673e+40	GstE14,Jheh1,Npc1a,Pdh,CG9512,CG7675,Marf,scu
GO:0022857	transmembrane transporter activity	0.0121471	-4.41067	15	10	0.0123916	3.16744e+51	CG9657,aralar1,SLC5A11,CG10444,CG6126,CG3168,ClC-b,CG6356,sea,CG5687
GO:0045197	establishment or maintenance of epithelial cell apical/basal polarity	0.0121471	-4.41067	15	10	0.0123916	4.48613e+49	sdt,Moe,AMPKalpha,dlg1,Cont,scaf,l(2)gl,Csk,scrib,veli
GO:0048102	autophagic cell death	0.0123116	-4.39721	13	9	0.0111524	3.82183e+44	drpr,l(2)gl,Pak,ctp,BI-1,Trf2,Itp-r83A,crq,Mdh2
GO:0006491	N-glycan processing	0.0149005	-4.20636	4	4	0.00495663	3.19573e+19	alpha-Man-Ia,ninaA,alpha-Man-IIb,Hexo1
GO:0043471	regulation of cellular carbohydrate catabolic process	0.0149005	-4.20636	4	4	0.00495663	3.91503e+19	Ilp2,GlyP,GlyS,Atg1
GO:0035041	sperm chromatin decondensation	0.0149005	-4.20636	4	4	0.00495663	4.35603e+19	Nlp,mamo,Nap1,Nph
GO:0005981	regulation of glycogen catabolic process	0.0149005	-4.20636	4	4	0.00495663	4.18234e+19	GlyS,Ilp2,GlyP,Atg1
GO:0018198	peptidyl-cysteine modification	0.0149005	-4.20636	4	4	0.00495663	3.93995e+19	app,l(3)02640,Gapdh1,Gapdh2
GO:0009081	branched-chain amino acid metabolic process	0.0149005	-4.20636	4	4	0.00495663	3.35507e+21	CG17691,CG15093,CG1673,CG17896
GO:0061058	regulation of peptidoglycan recognition protein signaling pathway	0.0149005	-4.20636	4	4	0.00495663	3.47783e+19	TM9SF4,Usp2,Rel,Listericin
GO:0046148	pigment biosynthetic process	0.0158677	-4.14347	24	14	0.0173482	3.43943e+69	CG5037,PAPLA1,ninaA,alpha-Man-IIb,Hexo1,l(3)02640,Cnx99A,cl,pr,santa-maria,se,rdhB,Pu,pinta
GO:0006839	mitochondrial transport	0.0159566	-4.13789	33	18	0.0223048	4.28454e+95	Miro,ATPsynbeta,Tom20,CG8206,CG1628,Tim23,Tom40,Tim9a,Tango9,CG34132,UQCR-C2,UQCR-C1,aralar1,Tim8,sea,CG8026,Tim10,porin
GO:0045596	negative regulation of cell differentiation	0.0180604	-4.01403	45	23	0.0285006	4.59594e+114	mts,COX4,chn,Bruce,norpA,UQCR-14,Kr-h1,lqf,bif,COX5A,slmb,l(2)gl,Ptpmeg,ed,Pten,tws,pros,Diap1,alph,CG5214,CG7834,cact,Stat92E
GO:0035088	establishment or maintenance of apical/basal cell polarity	0.0190526	-3.96055	20	12	0.0148699	4.13984e+59	Csk,scaf,l(2)gl,scrib,veli,sdt,Moe,dlg1,AMPKalpha,Rab5,alc,Cont
GO:0061245	establishment or maintenance of bipolar cell polarity	0.0190526	-3.96055	20	12	0.0148699	4.30034e+59	veli,scrib,l(2)gl,scaf,Csk,Cont,Rab5,alc,AMPKalpha,dlg1,Moe,sdt
GO:0010721	negative regulation of cell development	0.0205781	-3.88353	36	19	0.023544	3.21193e+94	bif,Kr-h1,UQCR-14,Bruce,norpA,COX4,mts,l(2)gl,slmb,COX5A,pros,tws,Pten,ed,Ptpmeg,CG7834,CG5214,alph,Diap1
GO:0006090	pyruvate metabolic process	0.0207257	-3.87638	18	11	0.0136307	3.57284e+54	Gapdh1,Pfk,Pglym78,Eno,Pfrx,Pdk,Pgi,Pgk,Gapdh2,Tpi,PyK
GO:0045477	regulation of nurse cell apoptotic process	0.0221223	-3.81117	6	5	0.00619579	4.48874e+24	mdy,slmb,E2f1,Atg1,Bruce
GO:0051084	'de novo' posttranslational protein folding	0.0221223	-3.81117	6	5	0.00619579	3.65834e+24	Hsc70-5,DnaJ-1,CG11267,CG3061,Hsc70-4
GO:0050962	detection of light stimulus involved in sensory perception	0.0221223	-3.81117	6	5	0.00619579	3.60034e+24	trpl,inaD,inaC,trp,cry
GO:0051085	chaperone cofactor-dependent protein refolding	0.0221223	-3.81117	6	5	0.00619579	3.65834e+24	Hsc70-5,DnaJ-1,Hsc70-4,CG3061,CG11267
GO:0007318	pole plasm protein localization	0.0221223	-3.81117	6	5	0.00619579	3.18163e+26	Moe,dlg1,par-1,scrib,bic
GO:1904748	regulation of apoptotic process involved in development	0.0221223	-3.81117	6	5	0.00619579	4.12604e+24	Bruce,Atg1,E2f1,slmb,mdy
GO:0070873	regulation of glycogen metabolic process	0.0221223	-3.81117	6	5	0.00619579	3.33864e+24	GlyP,Ilp2,GlyS,Gbs-70E,Atg1
GO:0032881	regulation of polysaccharide metabolic process	0.0221223	-3.81117	6	5	0.00619579	3.91503e+24	Ilp2,GlyP,GlyS,Gbs-70E,Atg1
GO:0050688	regulation of defense response to virus	0.0221223	-3.81117	6	5	0.00619579	3.10113e+24	Dredd,me31B,Rel,Stat92E,Rm62
GO:0009584	detection of visible light	0.0221564	-3.80963	27	15	0.0185874	3.23404e+76	rdgB,trpl,Gprk1,inaC,trp,Gycalpha99B,ninaA,Gbeta76C,norpA,cry,Rh4,Rh3,Inx3,ninaC,Arr2
GO:0042441	eye pigment metabolic process	0.0223778	-3.79969	16	10	0.0123916	4.26144e+49	rdhB,pinta,santa-maria,Cnx99A,cl,se,Hexo1,PAPLA1,ninaA,alpha-Man-IIb
GO:0043474	pigment metabolic process involved in pigmentation	0.0223778	-3.79969	16	10	0.0123916	4.26144e+49	rdhB,pinta,santa-maria,cl,Cnx99A,se,ninaA,alpha-Man-IIb,Hexo1,PAPLA1
GO:0043324	pigment metabolic process involved in developmental pigmentation	0.0223778	-3.79969	16	10	0.0123916	3.89734e+49	se,Cnx99A,cl,santa-maria,pinta,rdhB,Hexo1,alpha-Man-IIb,ninaA,PAPLA1
GO:0006726	eye pigment biosynthetic process	0.0223778	-3.79969	16	10	0.0123916	3.85283e+49	Hexo1,ninaA,alpha-Man-IIb,PAPLA1,rdhB,pinta,Cnx99A,cl,santa-maria,se
GO:0009165	nucleotide biosynthetic process	0.0227772	-3.78199	41	21	0.0260223	4.47504e+106	Ady43A,ATPsynB,ATPsynG,ATPsyngamma,ATPsynbeta,AMPdeam,CG17691,rut,ATPsynCF6,Adk2,awd,AdenoK,ATPsynD,Gycalpha99B,sun,ATPCL,CG12016,ATPsyndelta,blw,CG11089,pdgy
GO:1901293	nucleoside phosphate biosynthetic process	0.0227772	-3.78199	41	21	0.0260223	3.19504e+106	ATPsyndelta,CG12016,blw,CG11089,pdgy,Gycalpha99B,sun,ATPCL,ATPsynCF6,Adk2,awd,AdenoK,ATPsynD,Ady43A,ATPsynB,ATPsynG,ATPsynbeta,CG17691,AMPdeam,ATPsyngamma,rut
GO:0015985	energy coupled proton transport, down electrochemical gradient	0.0239009	-3.73384	14	9	0.0111524	4.22914e+44	ATPsynD,ATPsynCF6,ATPsyndelta,blw,ATPsynbeta,ATPsyngamma,sun,ATPsynG,ATPsynB
GO:0015986	ATP synthesis coupled proton transport	0.0239009	-3.73384	14	9	0.0111524	4.27593e+44	ATPsynCF6,ATPsyndelta,blw,ATPsynD,sun,ATPsynB,ATPsynG,ATPsynbeta,ATPsyngamma
GO:0009126	purine nucleoside monophosphate metabolic process	0.0250393	-3.68731	8	6	0.00743494	3.94794e+29	AdenoK,CG11089,AMPdeam,sdt,Ady43A,dlg1
GO:0010906	regulation of glucose metabolic process	0.0250393	-3.68731	8	6	0.00743494	3.33864e+29	GlyP,Ilp2,GlyS,Atg1,Gbs-70E,Nmda1
GO:0009167	purine ribonucleoside monophosphate metabolic process	0.0250393	-3.68731	8	6	0.00743494	4.47503e+29	Ady43A,dlg1,AdenoK,CG11089,AMPdeam,sdt
GO:0016056	rhodopsin mediated signaling pathway	0.0251092	-3.68452	12	8	0.00991326	4.35424e+39	trp,inaC,rdgB,Gycalpha99B,Gbeta76C,Arr2,ninaC,norpA
GO:0044275	cellular carbohydrate catabolic process	0.0251092	-3.68452	12	8	0.00991326	3.33864e+39	GlyP,GlyS,CG6910,beta-Man,Atg1,Treh,Tpi,Atg12
GO:0035071	salivary gland cell autophagic cell death	0.0251092	-3.68452	12	8	0.00991326	3.89363e+39	BI-1,l(2)gl,drpr,Pak,ctp,Mdh2,Itp-r83A,Trf2
GO:0006099	tricarboxylic acid cycle	0.0251092	-3.68452	12	8	0.00991326	3.99884e+39	CG7430,CG5028,CG5214,SdhD,Nc73EF,SdhB,Mdh2,kdn
GO:0072522	purine-containing compound biosynthetic process	0.0255981	-3.66524	39	20	0.0247831	3.94794e+101	AdenoK,ATPsynD,ATPsynCF6,Adk2,awd,ATPsyngamma,CG17691,AMPdeam,ATPsynbeta,rut,Ady43A,ATPsynB,ATPsynG,CG11089,pdgy,blw,ATPsyndelta,ATPCL,Gycalpha99B,sun
GO:0010675	regulation of cellular carbohydrate metabolic process	0.0256803	-3.66203	10	7	0.0086741	4.18234e+34	GlyS,Ilp2,GlyP,Ide,Atg1,Nmda1,Gbs-70E
GO:0007006	mitochondrial membrane organization	0.0256803	-3.66203	10	7	0.0086741	4.01894e+36	Tom20,Tim10,Tango9,Miro,CG34132,CG5903,Taz
GO:0043066	negative regulation of apoptotic process	0.0259026	-3.65341	32	17	0.0210657	5.74054e+88	futsch,Clk,Opa1,Pdk1,Bruce,Idgf2,RpS3,slmb,Prx3,csw,Tango9,puc,Ubr3,Pink1,Prx5,BI-1,Diap1
GO:0019438	aromatic compound biosynthetic process	0.0265437	-3.62896	101	45	0.0557621	46069,34804,37922,3355069,43829,43739,37834,41741,36387,44205,31782,44226,36160,43493,32587,38746,36760,35292,37617,31950,33759,38973,40415,42822,32426,37415,46140,39143,44750,32406,32352,43507,31863,42759,35483,42291,39479,42942,34394,44046,42994,38411,42550,42973,31773	ATPsynG,Smg5,Nurf-38,CG17691,ATPsynbeta,awd,Adk2,RpII15,spt4,spen,CG12116,Xbp1,Rpb5,Gycalpha99B,caz,ple,ATPCL,pr,blw,ATPsyndelta,vri,se,Rpb8,TfIIA-S,pdgy,Pu,l(3)02640,ATPsynB,Ady43A,rut,AMPdeam,ATPsyngamma,t,ATPsynCF6,Nipped-A,ATPsynD,AdenoK,Rpb10,CG5037,sun,Smg6,CG12016,E2f1,CG11089,Trf2
GO:0034654	nucleobase-containing compound biosynthetic process	0.0278869	-3.5796	81	37	0.0458488	4.29424e+186	Rpb10,Nipped-A,ATPsynD,AdenoK,ATPsynCF6,rut,ATPsyngamma,AMPdeam,Ady43A,ATPsynB,Trf2,CG11089,E2f1,CG12016,sun,Smg6,spen,spt4,RpII15,Adk2,awd,CG17691,ATPsynbeta,Nurf-38,ATPsynG,Smg5,pdgy,vri,TfIIA-S,Rpb8,blw,ATPsyndelta,caz,ATPCL,Gycalpha99B,Rpb5,Xbp1
GO:0043069	negative regulation of programmed cell death	0.0287848	-3.54791	37	19	0.023544	3.97534e+98	Diap1,BI-1,Ubr3,Pink1,puc,Prx5,Tango9,Dredd,csw,Prx3,slmb,RpS3,Idgf2,Pdk1,Bruce,norpA,Clk,Opa1,futsch
GO:0016311	dephosphorylation	0.0289416	-3.54248	49	24	0.0297398	3.62854e+121	Mppe,Ipp,CG9451,CG13197,laza,Lar,CG3530,CG12237,CG3632,mts,alph,Mkp3,puc,Pp2A-29B,CG6656,Pp1alpha-96A,tws,flw,Sur-8,Pten,CanB,csw,Ptpmeg,CG12091
GO:0034329	cell junction assembly	0.029078	-3.53777	30	16	0.0198265	4.40714e+81	Mcr,Cont,kst,btsz,pyd,CG44325,sdt,cindr,scrib,sinu,l(2)gl,Pak,shakB,alpha-Cat,dlg1,Lac
GO:0050768	negative regulation of neurogenesis	0.0326566	-3.42171	28	15	0.0185874	4.34813e+74	alph,l(2)gl,CG7834,CG5214,slmb,COX5A,bif,Kr-h1,Pten,pros,tws,mts,COX4,UQCR-14,ed
GO:0060249	anatomical structure homeostasis	0.0343303	-3.37173	57	27	0.0334572	3.88634e+134	Ank2,Lac,Cnx99A,Tao,alc,ninaC,Fkbp14,Arr2,bgm,trp,Cbp53E,comt,Csk,Atg1,Smg6,Mkp3,Csp,Ilp2,up,norpA,Pgk,RanBPM,Nap1,TER94,Smg5,Arr1,mbl
GO:1901362	organic cyclic compound biosynthetic process	0.0361354	-3.32048	113	49	0.0607187	42550,38411,42973,39396,31773,34394,44046,42994,31581,31863,42759,35483,42291,39479,42942,46140,39143,44750,32406,43507,32352,34358,31950,35292,37617,33759,38973,40415,42822,32426,37415,36467,31782,44226,36160,43493,32587,38746,36760,43739,37834,41741,36387,44205,46069,34804,37922,3355069,43829	E2f1,CG12016,CG11089,Adk1,Trf2,CG5037,sun,Smg6,Marf,t,ATPsynCF6,Nipped-A,ATPsynD,AdenoK,Rpb10,l(3)02640,ATPsynB,Ady43A,rut,ATPsyngamma,AMPdeam,Npc1a,ATPsyndelta,pr,blw,vri,se,Rpb8,TfIIA-S,pdgy,Pu,GstE14,CG12116,Xbp1,Rpb5,Gycalpha99B,caz,ple,ATPCL,awd,Adk2,RpII15,spt4,spen,ATPsynG,Smg5,Nurf-38,CG17691,ATPsynbeta
GO:0007043	cell-cell junction assembly	0.0366922	-3.30519	26	14	0.0173482	4.10624e+71	pyd,sdt,Lac,CG44325,kst,shakB,Cont,Mcr,dlg1,btsz,sinu,Pak,l(2)gl,scrib
GO:0042592	homeostatic process	0.0374228	-3.28548	184	76	0.094176	41428,43146,38413,43442,35078,36040,42845,39147,35931,44643,33062,39454,44226,33935,35886,31376,40155,41202,36060,42743,39611,34976,33351,43541,32545,44117,43582,36363,42109,38174,38863,46415,45012,44965,43991,40081,42994,34281,43542,34380,39150,34745,40664,36945,117332,34804,36003,43324,32948,45668,32124,36467,42620,34005,40193,33981,36905,41398,47091,36760,33461,32314,43831,36102,37798,33571,34…	ClC-a,boss,PHGPx,Vha100-1,Arr1,TER94,Miro,CG8177,alc,Cnx99A,shakB,Atg1,Xbp1,Galt,Pgi,norpA,SREBP,MtnA,Pfk,cnc,bmm,CaBP1,Eno,Capa,Gapdh2,bgm,Tpi,Lac,Prx3,cue,Ank2,Fer1HCH,Vha68-2,Fer2LCH,Pten,Mkp3,Smg6,Trx-2,trp,CYLD,Ilp2,CG6523,Itp-r83A,mbl,Rheb,Smg5,trpl,unc80,Tao,Vha68-1,prtp,GstE14,PyK,Ndae1,CG14184,smt3,Cbp53E,Csk,comt,ATPCL,Pgk,up,CG11077,RanBPM,Nap1,tim,ninaC,Arr2,Fkbp14,Cpn,Csp,Prx5,Drip,H…
GO:2000647	negative regulation of stem cell proliferation	0.0376272	-3.28003	17	10	0.0123916	3.31564e+49	l(2)gl,CG7834,CG5214,COX5A,Rel,pros,tws,mts,COX4,UQCR-14
GO:0019751	polyol metabolic process	0.0376272	-3.28003	17	10	0.0123916	3.74154e+49	Pu,Inos,Pten,norpA,pr,Tpi,l(1)G0196,Ipp,CG6910,CG12116
GO:0009199	ribonucleoside triphosphate metabolic process	0.0376272	-3.28003	17	10	0.0123916	4.27593e+49	ATPsynCF6,ATPsyndelta,blw,awd,ATPsynD,sun,ATPsynG,ATPsynB,ATPsynbeta,ATPsyngamma
GO:0009141	nucleoside triphosphate metabolic process	0.0376272	-3.28003	17	10	0.0123916	4.60694e+49	ATPsynG,ATPsynB,sun,ATPsynbeta,ATPsyngamma,awd,blw,ATPsyndelta,ATPsynCF6,ATPsynD
GO:0009206	purine ribonucleoside triphosphate biosynthetic process	0.0376272	-3.28003	17	10	0.0123916	4.40465e+49	sun,ATPsynG,ATPsynB,ATPsynbeta,ATPsyngamma,ATPsynCF6,ATPsyndelta,blw,awd,ATPsynD
GO:0005996	monosaccharide metabolic process	0.0376272	-3.28003	17	10	0.0123916	3.39353e+49	Galt,Pfrx,Pfk,Gapdh1,alpha-Man-IIb,Gapdh2,Pgk,Pgi,fbp,Tpi
GO:0009145	purine nucleoside triphosphate biosynthetic process	0.0376272	-3.28003	17	10	0.0123916	4.38294e+49	ATPsynbeta,ATPsyngamma,ATPsynG,ATPsynB,sun,ATPsynD,ATPsyndelta,awd,blw,ATPsynCF6
GO:0009142	nucleoside triphosphate biosynthetic process	0.0376272	-3.28003	17	10	0.0123916	4.40465e+49	sun,ATPsynG,ATPsynB,ATPsyngamma,ATPsynbeta,ATPsynCF6,awd,ATPsyndelta,blw,ATPsynD
GO:0009144	purine nucleoside triphosphate metabolic process	0.0376272	-3.28003	17	10	0.0123916	4.27593e+49	ATPsynCF6,ATPsyndelta,blw,awd,ATPsynD,sun,ATPsynG,ATPsynB,ATPsyngamma,ATPsynbeta
GO:0009201	ribonucleoside triphosphate biosynthetic process	0.0376272	-3.28003	17	10	0.0123916	4.37393e+49	awd,ATPsyndelta,blw,ATPsynCF6,ATPsynD,ATPsynG,ATPsynB,sun,ATPsyngamma,ATPsynbeta
GO:0009205	purine ribonucleoside triphosphate metabolic process	0.0376272	-3.28003	17	10	0.0123916	4.27594e+49	ATPsynCF6,blw,ATPsyndelta,awd,ATPsynD,sun,ATPsynB,ATPsynG,ATPsyngamma,ATPsynbeta
GO:0006470	protein dephosphorylation	0.0392184	-3.23861	38	19	0.023544	3.52594e+96	Lar,CG13197,Mppe,mts,CG3632,CG3530,Pp2A-29B,puc,Mkp3,alph,Ptpmeg,CG12091,CanB,csw,Sur-8,flw,Pten,tws,Pp1alpha-96A
GO:0032101	regulation of response to external stimulus	0.0408484	-3.19789	88	39	0.0483271	3.60574e+199	Jra,Lar,Rheb,Spn88Ea,Arr1,Rel,Pitslre,inaD,Gbeta76C,CYLD,AMPKalpha,me31B,NetB,Gprk1,Stat92E,GILT1,smt3,Usp2,Tim10,Dredd,Ide,Camta,Rm62,Pli,Fbxl4,Imp,Rala,norpA,inaC,TM9SF4,Listericin,GlyP,cact,rdgB,Prx5,Pten,Pp1alpha-96A,Arr2,ninaC
GO:0009060	aerobic respiration	0.0412461	-3.1882	24	13	0.016109	3.15793e+64	kdn,UQCR-14,COX4,Mdh2,SdhB,cype,COX5A,Nc73EF,SdhD,CG5028,CG5214,ND-23,CG7430
GO:0007406	negative regulation of neuroblast proliferation	0.0415315	-3.1813	15	9	0.0111524	4.13635e+44	pros,tws,COX4,mts,UQCR-14,l(2)gl,CG7834,CG5214,COX5A
GO:0006754	ATP biosynthetic process	0.0415315	-3.1813	15	9	0.0111524	4.40464e+44	sun,ATPsynB,ATPsynG,ATPsyngamma,ATPsynbeta,ATPsynCF6,blw,ATPsyndelta,ATPsynD
GO:2000178	negative regulation of neural precursor cell proliferation	0.0415315	-3.1813	15	9	0.0111524	4.14324e+44	COX5A,CG7834,CG5214,l(2)gl,mts,COX4,UQCR-14,tws,pros
GO:0042127	regulation of cell population proliferation	0.0423249	-3.16238	78	35	0.0433705	3.34184e+176	Rab5,Xrp1,COX4,cpo,Ilp2,Rel,Pkc53E,COX5A,scrib,Nurf-38,Pi3K21B,l(2)gl,grh,Cyt-b5,dlg1,Moe,pros,Tango9,Stat92E,Csk,Idgf2,mts,UQCR-14,slmb,E2f1,Mlf,FER,Pten,conu,tws,Nedd4,Mkp3,CG7834,CG17059,CG5214
GO:0009083	branched-chain amino acid catabolic process	0.0426999	-3.15356	3	3	0.00371747	3.09954e+16	CG17896,CG15093,CG17691
GO:0046461	neutral lipid catabolic process	0.0426999	-3.15356	3	3	0.00371747	324263961133532	pdgy,bmm,Hydr2
GO:0010635	regulation of mitochondrial fusion	0.0426999	-3.15356	3	3	0.00371747	315813657831607	Marf,Opa1,Pink1
GO:0051180	vitamin transport	0.0426999	-3.15356	3	3	0.00371747	359413138042646	CG8026,CG3556,Nrx-1
GO:0050691	regulation of defense response to virus by host	0.0426999	-3.15356	3	3	0.00371747	310114108742428	Dredd,Rel,Stat92E
GO:0019889	pteridine metabolic process	0.0426999	-3.15356	3	3	0.00371747	389733529237415	se,pr,Pu
GO:0006573	valine metabolic process	0.0426999	-3.15356	3	3	0.00371747	371663099532297	CG15093,CG17896,CG1673
GO:0044091	membrane biogenesis	0.0426999	-3.15356	3	3	0.00371747	426463638331816	Nrx-1,Amph,Moe
GO:1905897	regulation of response to endoplasmic reticulum stress	0.0426999	-3.15356	3	3	0.00371747	365783893644226	Opa1,BI-1,Xbp1
GO:0070983	dendrite guidance	0.0426999	-3.15356	3	3	0.00371747	324004454041363	NetB,ct,pros
GO:0043094	cellular metabolic compound salvage	0.0426999	-3.15356	3	3	0.00371747	3947932618932350	AdenoK,Adi1,AMPdeam
GO:0042065	glial cell growth	0.0426999	-3.15356	3	3	0.00371747	336354624332428	bdl,poe,eag
GO:0071484	cellular response to light intensity	0.0426999	-3.15356	3	3	0.00371747	356203658943806	Tsp42Ej,Ih,Ekar
GO:0006020	inositol metabolic process	0.0426999	-3.15356	3	3	0.00371747	393913313735671	CG6910,l(1)G0196,Inos
GO:0034308	primary alcohol metabolic process	0.0426999	-3.15356	3	3	0.00371747	3.77188e+16	Adh,CG7675,Pdh
GO:0002230	positive regulation of defense response to virus by host	0.0426999	-3.15356	3	3	0.00371747	410874242831011	Rel,Stat92E,Dredd
GO:0006002	fructose 6-phosphate metabolic process	0.0426999	-3.15356	3	3	0.00371747	3.60603e+16	Pfk,Gfat1,fbp
GO:0006728	pteridine biosynthetic process	0.0426999	-3.15356	3	3	0.00371747	389733529237415	se,pr,Pu
GO:0045819	positive regulation of glycogen catabolic process	0.0426999	-3.15356	3	3	0.00371747	394544182333386	Atg1,GlyS,GlyP
GO:1903321	negative regulation of protein modification by small protein conjugation or removal	0.0426999	-3.15356	3	3	0.00371747	411815022740596	hyd,CG17059,ctrip
GO:0046464	acylglycerol catabolic process	0.0426999	-3.15356	3	3	0.00371747	324263353239611	pdgy,Hydr2,bmm
GO:0007469	antennal development	0.0426999	-3.15356	3	3	0.00371747	317173975344540	sn,Diap1,ct
GO:0018130	heterocycle biosynthetic process	0.0451972	-3.09672	104	45	0.0557621	42994,44046,34394,31773,39396,42973,42550,38411,43507,32352,32406,44750,39143,46140,42942,39479,35483,42291,42759,31863,32587,36760,43493,36160,44226,31782,37415,32426,38973,40415,42822,33759,31950,35292,37617,3355069,43829,37922,34804,46069,44205,41741,36387,37834,43739	Smg6,sun,CG5037,Trf2,Adk1,CG11089,E2f1,CG12016,ATPsyngamma,AMPdeam,rut,Ady43A,ATPsynB,l(3)02640,Rpb10,AdenoK,Nipped-A,ATPsynD,ATPsynCF6,t,caz,ATPCL,Gycalpha99B,Rpb5,Xbp1,CG12116,Pu,pdgy,se,Rpb8,TfIIA-S,vri,ATPsyndelta,pr,blw,CG17691,ATPsynbeta,Nurf-38,Smg5,ATPsynG,spen,RpII15,spt4,Adk2,awd
GO:0035070	salivary gland histolysis	0.0455853	-3.08817	13	8	0.00991326	4.21854e+39	Mdh2,Itp-r83A,Trf2,BI-1,ctp,Pak,drpr,l(2)gl
GO:0015893	drug transport	0.0455853	-3.08817	13	8	0.00991326	3.59414e+39	CG8026,Dic1,Nrx-1,Indy,CG3556,aralar1,glob1,CG1628
GO:0060548	negative regulation of cell death	0.0463011	-3.07259	41	20	0.0247831	4.21095e+104	Prx3,csw,Dredd,Tango9,tau,Prx5,puc,Pink1,Ubr3,BI-1,Diap1,futsch,Clk,Opa1,Bruce,Pdk1,norpA,Idgf2,RpS3,slmb
GO:0045807	positive regulation of endocytosis	0.0463877	-3.07072	22	12	0.0148699	4.48614e+59	sdt,Arf79F,Pkc53E,Moe,norpA,Tao,Nrx-1,BicD,drpr,inaC,cindr,Nedd4
GO:0006637	acyl-CoA metabolic process	0.0495846	-3.00408	11	7	0.0086741	3.24264e+36	pdgy,ATPCL,CG17691,scu,CG7920,wat,CG1441
GO:0035383	thioester metabolic process	0.0495846	-3.00408	11	7	0.0086741	3.27894e+36	scu,CG1441,wat,CG7920,ATPCL,pdgy,CG17691
GO:0007608	sensory perception of smell	0.0521949	-2.95277	20	11	0.0136307	3.57893e+54	Obp44a,eag,Cyp6w1,rdgB,Obp57c,Arr1,Klp64D,Obp19d,Obp56g,Dyrk2,Arr2
GO:0002832	negative regulation of response to biotic stimulus	0.0521949	-2.95277	20	11	0.0136307	4.28214e+56	Pli,Prx5,Spn88Ea,cact,Stat92E,GlyP,Jra,TM9SF4,Rala,Tim10,Usp2
GO:0009123	nucleoside monophosphate metabolic process	0.0531001	-2.93558	9	6	0.00743494	4.47503e+29	Ady43A,dlg1,AdenoK,CG11089,sdt,AMPdeam
GO:0009161	ribonucleoside monophosphate metabolic process	0.0531001	-2.93558	9	6	0.00743494	3.23524e+29	AMPdeam,sdt,AdenoK,CG11089,dlg1,Ady43A
GO:0032007	negative regulation of TOR signaling	0.0531001	-2.93558	9	6	0.00743494	4.25041e+30	slmb,Rheb,AMPKalpha,Atg1,ATPsynD,Pten
GO:0030382	sperm mitochondrion organization	0.0537207	-2.92396	5	4	0.00495663	4.56833e+19	milt,porin,Pink1,ref(2)P
GO:0008320	protein transmembrane transporter activity	0.0537207	-2.92396	5	4	0.00495663	4.49783e+21	Tom40,Sec61alpha,Tim23,Tom20
GO:0045610	regulation of hemocyte differentiation	0.0537207	-2.92396	5	4	0.00495663	3.49694e+19	cact,DnaJ-1,Mlf,Cyt-b5
GO:2000370	positive regulation of clathrin-dependent endocytosis	0.0537207	-2.92396	5	4	0.00495663	4.83114e+19	Pkc53E,BicD,inaC,norpA
GO:0006094	gluconeogenesis	0.0537207	-2.92396	5	4	0.00495663	4.35824e+19	Tpi,fbp,Pgk,Pgi
GO:0007007	inner mitochondrial membrane organization	0.0537207	-2.92396	5	4	0.00495663	4.37988e+21	CG34132,CG5903,Taz,Tim10
GO:0045494	photoreceptor cell maintenance	0.0537207	-2.92396	5	4	0.00495663	3.89933e+19	Arr2,ninaC,Arr1,norpA
GO:0016335	morphogenesis of larval imaginal disc epithelium	0.0537207	-2.92396	5	4	0.00495663	3.31563e+19	l(2)gl,Moe,scrib,dlg1
GO:0016336	establishment or maintenance of polarity of larval imaginal disc epithelium	0.0537207	-2.92396	5	4	0.00495663	3.20834e+19	dlg1,scrib,l(2)gl,Moe
GO:0019319	hexose biosynthetic process	0.0537207	-2.92396	5	4	0.00495663	3.58863e+19	Pgi,Pgk,Tpi,fbp
GO:0071322	cellular response to carbohydrate stimulus	0.0537207	-2.92396	5	4	0.00495663	3.91504e+19	Ilp2,GlyS,ACC,FASN1
GO:0001676	long-chain fatty acid metabolic process	0.0537207	-2.92396	5	4	0.00495663	3.24264e+19	pdgy,Baldspot,bgm,CG3961
GO:0043470	regulation of carbohydrate catabolic process	0.0537207	-2.92396	5	4	0.00495663	3.33864e+19	GlyP,Ilp2,GlyS,Atg1
GO:0006721	terpenoid metabolic process	0.0537207	-2.92396	5	4	0.00495663	2.51984e+20	Jheh1,CG7675,Pdh,santa-maria
GO:0007464	R3/R4 cell fate commitment	0.0552038	-2.89672	7	5	0.00619579	3.60574e+24	Jra,grh,Rala,scrib,lola
GO:0046463	acylglycerol biosynthetic process	0.0552038	-2.89672	7	5	0.00619579	4.48874e+24	mdy,ACC,FASN1,mino,norpA
GO:0046164	alcohol catabolic process	0.0552038	-2.89672	7	5	0.00619579	4.35824e+26	Tpi,Ipp,CG6910,Adh,Pten
GO:1901616	organic hydroxy compound catabolic process	0.0552038	-2.89672	7	5	0.00619579	4.35824e+26	Tpi,CG6910,Ipp,Pten,Adh
GO:0046460	neutral lipid biosynthetic process	0.0552038	-2.89672	7	5	0.00619579	4.48874e+24	mdy,ACC,FASN1,norpA,mino
GO:0016057	regulation of membrane potential in photoreceptor cell	0.0552038	-2.89672	7	5	0.00619579	3.14563e+26	SK,Moe,Ekar,inaF-B,Ih
GO:0050953	sensory perception of light stimulus	0.0587541	-2.83439	18	10	0.0123916	3.76294e+49	inaD,sif,boss,Rh4,cry,t,Rh3,trpl,trp,inaC
GO:0006790	sulfur compound metabolic process	0.058803	-2.83356	37	18	0.0223048	3.89734e+92	se,St1,pdgy,GstE14,wat,CG7920,St3,Eip71CD,ATPCL,CG7430,GstE6,CG1441,CG31637,Adi1,scu,GstD1,GstO3,CG17691
GO:0048871	multicellular organismal homeostasis	0.0591776	-2.82721	25	13	0.016109	3.50784e+64	Arr1,Atg1,Mkp3,trp,Csk,ninaC,Arr2,Tao,Cnx99A,norpA,ClC-a,tim,Lac
GO:0044282	small molecule catabolic process	0.0602592	-2.8091	42	20	0.0247831	4.12754e+103	CG14688,P5CDh1,Ipp,CG6910,CG17691,TER94,wal,Gad1,CG5955,CG17896,Pfk,Adh,Pten,Gdh,Tpi,Arc42,Galt,CG15093,CG7430,Hydr2
GO:0030155	regulation of cell adhesion	0.0661577	-2.71571	16	9	0.0111524	4.10624e+46	pyd,Pten,Ten-m,dlg1,Sec23,Zasp52,Timp,par-1,Lar
GO:0006638	neutral lipid metabolic process	0.0661577	-2.71571	16	9	0.0111524	4.48873e+44	mdy,FASN1,Hydr2,bmm,CG17646,mino,pdgy,ACC,norpA
GO:0006639	acylglycerol metabolic process	0.0661577	-2.71571	16	9	0.0111524	3.13763e+44	norpA,pdgy,ACC,Hydr2,bmm,CG17646,mino,mdy,FASN1
GO:0051965	positive regulation of synapse assembly	0.0661577	-2.71571	16	9	0.0111524	4.40394e+45	Pak,wit,caz,Nedd4,nmo,Rheb,Synd,Ank2,dlg1
GO:1901617	organic hydroxy compound biosynthetic process	0.0661577	-2.71571	16	9	0.0111524	3.52923e+44	pr,t,norpA,Inos,Pu,CG12116,Marf,ple,l(1)G0196
GO:0044262	cellular carbohydrate metabolic process	0.0663558	-2.71272	35	17	0.0210657	4.53684e+84	Treh,Atg12,fbp,ACC,Inos,beta-Man,FASN1,Ipp,l(1)G0196,GlyS,CG6910,Pfrx,Tpi,Pten,CG7766,Atg1,GlyP
GO:0044255	cellular lipid metabolic process	0.0665928	-2.70916	96	41	0.0508055	3.81543e+207	ND-ACP,norpA,SREBP,Inos,Taz,CG3530,CG30503,scu,GlcAT-S,bmm,mino,CG3961,wal,mdy,laza,Ipp,CG7582,santa-maria,Arc42,bgm,Jheh1,Pten,CG17646,CG7149,CG14945,CG7990,rdgB,CG14688,CG31523,ACC,Pi3K21B,FASN1,CG7675,CG5326,pdgy,CG2201,Baldspot,Hydr2,CG3009,ATPCL,Pdh
GO:0032102	negative regulation of response to external stimulus	0.066993	-2.70317	23	12	0.0148699	3.47783e+61	TM9SF4,GlyP,Jra,cact,Stat92E,Spn88Ea,Prx5,Pli,Usp2,Pten,Tim10,Rala
GO:0043297	apical junction assembly	0.066993	-2.70317	23	12	0.0148699	4.61874e+61	sinu,Pak,l(2)gl,scrib,sdt,CG44325,Lac,kst,Cont,Mcr,dlg1,btsz
GO:0012501	programmed cell death	0.0678716	-2.69014	55	25	0.0309789	4.12604e+124	Bruce,Atg12,crq,chrb,Ire1,Itp-r83A,mbl,Pak,l(2)gl,Acn,TER94,Miro,lola,E2f1,Tao,Mdh2,Dredd,Trf2,Pink1,Atg1,BI-1,ninaA,Diap1,ctp,drpr
GO:0043067	regulation of programmed cell death	0.0717221	-2.63496	68	30	0.0371747	4.27614e+153	RpS3,slmb,l(2)gl,Pak,mdy,TER94,Bruce,Pdk1,norpA,Idgf2,futsch,Clk,Opa1,Pink1,Prx5,Atg1,puc,Ubr3,Diap1,BI-1,Csk,Tango9,csw,Dredd,Mdh2,E2f1,Prx3,Den1,Actbeta,Pten
GO:0033044	regulation of chromosome organization	0.0720359	-2.63059	28	14	0.0173482	4.24284e+69	Stat92E,jim,ctrip,Smg6,slmb,vig2,Smg5,mamo,CG8036,tws,Moe,hyd,crol,Invadolysin
GO:0045887	positive regulation of synaptic growth at neuromuscular junction	0.074498	-2.59698	14	8	0.00991326	3.25874e+40	caz,wit,Pak,Synd,Rheb,nmo,Ank2,dlg1
GO:1904398	positive regulation of neuromuscular junction development	0.074498	-2.59698	14	8	0.00991326	4.24674e+40	Synd,nmo,Rheb,wit,Pak,caz,dlg1,Ank2
GO:0017144	drug metabolic process	0.0747284	-2.5939	58	26	0.0322181	3.91435e+134	ATPsynB,ATPsynG,Ady43A,ATPsyngamma,AMPdeam,ATPsynbeta,t,Idgf2,ATPsynCF6,Gasp,Adi1,AdenoK,ATPsynD,CG12116,Prx5,sun,CG7430,ple,ATPCL,blw,pr,ATPsyndelta,CG12118,Adh,Prx3,Pu
GO:0042981	regulation of apoptotic process	0.0747284	-2.5939	58	26	0.0322181	3.63394e+133	Den1,Prx3,Pten,Actbeta,csw,E2f1,Dredd,Mdh2,Tango9,Ubr3,Prx5,Atg1,puc,Pink1,BI-1,Diap1,futsch,Opa1,Clk,Pdk1,Bruce,Idgf2,TER94,mdy,RpS3,slmb
GO:0008285	negative regulation of cell population proliferation	0.0749564	-2.59085	33	16	0.0198265	4.39915e+79	Pten,tws,pros,CG7834,CG5214,Csk,mts,Xrp1,COX4,Rab5,UQCR-14,Rel,COX5A,slmb,scrib,l(2)gl
GO:0006631	fatty acid metabolic process	0.0749564	-2.59085	33	16	0.0198265	3.24264e+80	pdgy,CG5326,Arc42,bgm,ATPCL,Baldspot,Hydr2,CG31523,SREBP,ACC,ND-ACP,CG14688,wal,scu,mino,CG3961
GO:0007605	sensory perception of sound	0.0759626	-2.57751	21	11	0.0136307	3.89933e+54	Arr2,CG8086,inaD,Ank2,tko,ct,Klp64D,wtrw,trpl,trp,CAP
GO:0072330	monocarboxylic acid biosynthetic process	0.0759626	-2.57751	21	11	0.0136307	3.67604e+55	ATPCL,Gad1,CG3961,Baldspot,Hydr2,ACC,CG31523,SREBP,bgm,CG5326,ND-ACP
GO:0001894	tissue homeostasis	0.0759626	-2.57751	21	11	0.0136307	3.50784e+54	Arr1,Atg1,Mkp3,trp,Csk,Cnx99A,Tao,Arr2,ninaC,norpA,Lac
GO:0050954	sensory perception of mechanical stimulus	0.081663	-2.50515	26	13	0.016109	3.12284e+64	tko,Ank2,inaD,Klp64D,ct,CG8086,ClC-b,Arr2,trpl,CAP,trp,mri,wtrw
GO:0010942	positive regulation of cell death	0.081663	-2.50515	26	13	0.016109	3.60403e+65	TER94,l(2)gl,Pak,Csk,Rheb,Sec61alpha,Atg1,RpS3,Pten,Den1,Mdh2,Dredd,E2f1
GO:0008219	cell death	0.0833439	-2.48478	56	25	0.0309789	3.69454e+124	mbl,Miro,TER94,Acn,l(2)gl,Pak,chrb,crq,Atg12,Bruce,Itp-r83A,Ire1,Diap1,ninaA,BI-1,Atg1,Pink1,drpr,ctp,Mdh2,Dredd,Tao,E2f1,lola,Trf2
GO:0009743	response to carbohydrate	0.0838501	-2.47872	12	7	0.0086741	3.60604e+34	Pfk,Ilp2,PyK,ACC,FASN1,GlyS,boss
GO:0006641	triglyceride metabolic process	0.0838501	-2.47872	12	7	0.0086741	4.48873e+34	mdy,pdgy,FASN1,ACC,bmm,CG17646,mino
GO:0006109	regulation of carbohydrate metabolic process	0.0838501	-2.47872	12	7	0.0086741	3.33864e+34	GlyP,Ilp2,GlyS,Nmda1,Gbs-70E,Atg1,Ide
GO:0033865	nucleoside bisphosphate metabolic process	0.0838501	-2.47872	12	7	0.0086741	3.24264e+36	pdgy,ATPCL,CG17691,scu,wat,CG7920,CG1441
GO:0034032	purine nucleoside bisphosphate metabolic process	0.0838501	-2.47872	12	7	0.0086741	3.67603e+36	ATPCL,pdgy,CG17691,scu,CG7920,CG1441,wat
GO:0033875	ribonucleoside bisphosphate metabolic process	0.0838501	-2.47872	12	7	0.0086741	3.24264e+36	pdgy,ATPCL,CG17691,scu,wat,CG7920,CG1441
GO:0061077	chaperone-mediated protein folding	0.0838501	-2.47872	12	7	0.0086741	3.88704e+34	CG7409,CG11267,CG3061,Hsc70-4,sel,Hsc70-5,DnaJ-1
GO:0006605	protein targeting	0.0847716	-2.46779	31	15	0.0185874	4.18004e+78	UQCR-C1,UQCR-C2,CG34132,Tim9a,Tom40,Sec61alpha,Tim8,Tim23,Tom20,CG8206,app,Tim10,Sec63,Srp9,milt
GO:0006633	fatty acid biosynthetic process	0.0862957	-2.44998	19	10	0.0123916	4.00564e+50	CG3961,Baldspot,Hydr2,ATPCL,bgm,CG5326,ND-ACP,ACC,CG31523,SREBP
GO:0060033	anatomical structure regression	0.09274	-2.37796	24	12	0.0148699	4.06644e+59	Itp-r83A,Pten,Trf2,Mdh2,Atg12,TER94,drpr,l(2)gl,ctp,Pak,BI-1,Atg1
GO:0017004	cytochrome complex assembly	0.0942297	-2.36202	10	6	0.00743494	3.25866e+31	UQCR-14,CG34242,CG5037,CG17996,COX6B,Cchl
GO:0046621	negative regulation of organ growth	0.0942297	-2.36202	10	6	0.00743494	4.13983e+29	Csk,l(2)gl,Pten,dlg1,scrib,Tao
GO:0022407	regulation of cell-cell adhesion	0.0942297	-2.36202	10	6	0.00743494	4.04644e+31	Ten-m,Timp,par-1,dlg1,Lar,Sec23
GO:0043543	protein acylation	0.0942297	-2.36202	10	6	0.00743494	3.23184e+29	tth,san,Nipped-A,trx,Act87E,app
GO:0010821	regulation of mitochondrion organization	0.0942297	-2.36202	10	6	0.00743494	3.15814e+29	Marf,Opa1,SREBP,Miro,Tango9,Pink1
GO:0050906	detection of stimulus involved in sensory perception	0.0942297	-2.36202	10	6	0.00743494	3.13764e+29	norpA,cry,trpl,inaD,trp,inaC
GO:0046173	polyol biosynthetic process	0.0942297	-2.36202	10	6	0.00743494	3.13764e+29	norpA,pr,CG12116,Pu,l(1)G0196,Inos
GO:0043901	negative regulation of multi-organism process	0.0960009	-2.3434	29	14	0.0173482	4.28214e+71	Pli,Prx5,slmb,Spn88Ea,Stat92E,cact,TM9SF4,GlyP,Jra,Bruce,Rala,Ptpmeg,Tim10,Usp2
GO:0030100	regulation of endocytosis	0.0972665	-2.3303	34	16	0.0198265	3.50514e+79	BicD,scrib,cindr,sdt,Pkc53E,pyd,norpA,Rab5,crq,Nrx-1,drpr,inaC,Nedd4,Arf79F,Moe,Tao
GO:0018193	peptidyl-amino acid modification	0.0981934	-2.32082	62	27	0.0334572	4.47243e+136	san,tth,Hph,FER,trx,CG33303,Gapdh2,Ptpmeg,ninaC,Csk,inaC,Asph,ninaA,smt3,Pkc53E,Pkn,Nipped-A,Pdk1,awd,Act87E,Dyrk2,CkIIalpha,Gapdh1,vig2,Pka-C3,l(3)02640,app
GO:0120192	tight junction assembly	0.0982545	-2.32019	17	9	0.0111524	3.18314e+44	CG44325,Lac,Mcr,Cont,dlg1,sinu,l(2)gl,Pak,scrib
GO:0006366	transcription by RNA polymerase II	0.0982545	-2.32019	17	9	0.0111524	3.25874e+44	caz,Rpb5,Xbp1,Rpb10,Trf2,spt4,RpII15,TfIIA-S,Rpb8
GO:0120193	tight junction organization	0.0982545	-2.32019	17	9	0.0111524	4.40714e+44	Mcr,Cont,dlg1,Lac,CG44325,scrib,sinu,Pak,l(2)gl
GO:0019991	septate junction assembly	0.0982545	-2.32019	17	9	0.0111524	3.63633e+44	Lac,CG44325,dlg1,Mcr,Cont,l(2)gl,Pak,sinu,scrib
GO:0007600	sensory perception	0.0986191	-2.31649	75	32	0.039653	3.12283e+159	tko,norpA,Dyrk2,t,ClC-b,Obp57c,wtrw,Ank2,Rh4,Arr2,Obp56g,rdgB,Cyp6w1,trp,Obp44a,inaC,inaD,boss,Itp-r83A,Rh3,trpl,eag,CAP,Arr1,pros,sif,Obp19d,ct,Klp64D,cry,CG8086,mri
GO:0010941	regulation of cell death	0.104885	-2.25489	78	33	0.0408922	4.25504e+170	E2f1,Actbeta,Pten,Prx3,Diap1,Prx5,Ubr3,Pink1,puc,Idgf2,Pdk1,norpA,Clk,slmb,RpS3,mdy,Pak,Mdh2,Dredd,csw,Den1,BI-1,tau,Sec61alpha,Atg1,Tango9,Csk,Bruce,Opa1,futsch,Rheb,TER94,l(2)gl
GO:0045455	ecdysteroid metabolic process	0.105478	-2.24925	8	5	0.00619579	3.15813e+24	Marf,CG9512,GstE14,Npc1a,scu
GO:0006122	mitochondrial electron transport, ubiquinol to cytochrome c	0.105478	-2.24925	8	5	0.00619579	4.43904e+24	RFeSP,UQCR-Q,UQCR-14,UQCR-C1,UQCR-C2
GO:2000736	regulation of stem cell differentiation	0.105478	-2.24925	8	5	0.00619579	4.24284e+24	Stat92E,Arf79F,Pdcd4,lqf,Nedd8
GO:0048056	R3/R4 cell differentiation	0.105478	-2.24925	8	5	0.00619579	3.60574e+24	Jra,grh,Rala,scrib,lola
GO:0016072	rRNA metabolic process	0.105537	-2.24869	22	11	0.0136307	4.72184e+56	RpS14a,Dbp45A,RpL10Ab,CG4364,mRpS9,RpS8,RpL7A,Rpp20,CG7637,RpL35,RpS7
GO:0006364	rRNA processing	0.105537	-2.24869	22	11	0.0136307	3.93385e+56	RpL10Ab,RpS14a,Dbp45A,RpS8,mRpS9,CG4364,RpL35,RpL7A,Rpp20,CG7637,RpS7
GO:0043068	positive regulation of programmed cell death	0.105537	-2.24869	22	11	0.0136307	3.94544e+54	Atg1,RpS3,Pak,Csk,l(2)gl,TER94,E2f1,Mdh2,Dredd,Den1,Pten
GO:0045475	locomotor rhythm	0.10945	-2.21229	37	17	0.0210657	3.20833e+84	dlg1,tim,vri,cry,Ih,unc80,Fer2LCH,qsm,slmb,Pka-R2,CkIIalpha,CrebB,ITP,unc79,cu,Clk,Ilp2
GO:0007286	spermatid development	0.109897	-2.20821	32	15	0.0185874	3.97533e+74	Diap1,Hydr2,Nap1,alphaTub84D,poe,ctp,mlt,Dredd,Npc1a,porin,milt,Bruce,Taz,hyd,Klp64D
GO:0140053	mitochondrial gene expression	0.112174	-2.18771	15	8	0.00991326	3.44126e+39	mRpS7,mRpL36,scu,mRpL24,mRpS9,mRpL30,CG12848,tko
GO:0045595	regulation of cell differentiation	0.114688	-2.16554	156	62	0.0768278	39454,43481,32400,42428,36915,40694,38831,45278,32083,33619,35688,40506,41363,43892,117332,41432,35259,36057,36040,37038,36468,33156,35279,42854,34364,41260,43904,46015,39753,40958,2768852,32743,39958,37557,41360,43515,31405,34969,42550,38059,35151,32337,43991,36750,47877,35215,42504,42743,44887,38995,44039,45959,41225,45827,36678,31376,32586,38846,33861,32119,38643,32009	Atg1,alph,NetB,Stat92E,RhoGEF2,Sec23,Rac2,csw,dlg1,ed,Cyt-b5,Arf79F,pros,sif,Rheb,COX5A,Lar,Jra,TER94,grh,Mp20,l(2)gl,COX4,Syx1A,me31B,Bruce,AMPKalpha,tutl,Diap1,puc,par-1,RhoGAPp190,Nedd4,babos,CG5214,CG7834,ctp,cact,E2f1,Ptpmeg,Nedd8,Pdcd4,Pten,Mlf,tws,Pax,slmb,cnc,mdy,h,Pak,mts,Mical,bic,chn,norpA,UQCR-14,lqf,Kr-h1,bif,DnaJ-1,Imp
GO:0007289	spermatid nucleus differentiation	0.116917	-2.14629	6	4	0.00495663	3.97534e+19	Diap1,Nap1,hyd,ctp
GO:0090162	establishment of epithelial cell polarity	0.116917	-2.14629	6	4	0.00495663	4.59594e+19	mts,slmb,scrib,l(2)gl
GO:0002921	negative regulation of humoral immune response	0.116917	-2.14629	6	4	0.00495663	4.24283e+19	Stat92E,cact,Jra,Usp2
GO:0009168	purine ribonucleoside monophosphate biosynthetic process	0.116917	-2.14629	6	4	0.00495663	4.47504e+19	Ady43A,AdenoK,CG11089,AMPdeam
GO:0046174	polyol catabolic process	0.116917	-2.14629	6	4	0.00495663	4.35824e+19	Tpi,Pten,Ipp,CG6910
GO:0006720	isoprenoid metabolic process	0.116917	-2.14629	6	4	0.00495663	3.98124e+20	Pdh,CG7675,Jheh1,santa-maria
GO:0048311	mitochondrion distribution	0.116917	-2.14629	6	4	0.00495663	4.56833e+19	milt,Pink1,larp,clu
GO:0070584	mitochondrion morphogenesis	0.116917	-2.14629	6	4	0.00495663	4.25874e+19	Mitofilin,Opa1,Marf,Hsc70-5
GO:0070936	protein K48-linked ubiquitination	0.116917	-2.14629	6	4	0.00495663	4.11813e+19	hyd,Ubr3,Pli,Diap1
GO:0033013	tetrapyrrole metabolic process	0.116917	-2.14629	6	4	0.00495663	3.43943e+19	CG5037,CG12118,l(3)02640,Ho
GO:0009065	glutamine family amino acid catabolic process	0.116917	-2.14629	6	4	0.00495663	3.60404e+19	TER94,Gad1,P5CDh1,Gdh
GO:0030713	ovarian follicle cell stalk formation	0.116917	-2.14629	6	4	0.00495663	4.45404e+19	ct,Stat92E,pigs,slmb
GO:0008535	respiratory chain complex IV assembly	0.116917	-2.14629	6	4	0.00495663	3.29896e+21	COX6B,CG34242,CG17996,CG5037
GO:0000289	nuclear-transcribed mRNA poly(A) tail shortening	0.116917	-2.14629	6	4	0.00495663	4.13394e+19	cu,Not3,CG11486,Pop2
GO:0098632	cell-cell adhesion mediator activity	0.116917	-2.14629	6	4	0.00495663	3.36354e+20	bdl,Cont,Bsg,tutl
GO:0045175	basal protein localization	0.116917	-2.14629	6	4	0.00495663	3.20834e+19	dlg1,scrib,l(2)gl,Rab10
GO:0006855	drug transmembrane transport	0.116917	-2.14629	6	4	0.00495663	3.19904e+19	CG1628,Indy,Dic1,aralar1
GO:0019432	triglyceride biosynthetic process	0.116917	-2.14629	6	4	0.00495663	3.57613e+19	ACC,FASN1,mdy,mino
GO:0009127	purine nucleoside monophosphate biosynthetic process	0.116917	-2.14629	6	4	0.00495663	3.94794e+19	AdenoK,CG11089,AMPdeam,Ady43A
GO:0051668	localization within membrane	0.116917	-2.14629	6	4	0.00495663	4.26464e+19	Nrx-1,scrib,dlg1,l(2)gl
GO:0046364	monosaccharide biosynthetic process	0.116917	-2.14629	6	4	0.00495663	3.58863e+19	Pgi,Pgk,fbp,Tpi
GO:0023058	adaptation of signaling pathway	0.116917	-2.14629	6	4	0.00495663	3.68973e+19	inaC,ninaC,Arr2,Arr1
GO:0006383	transcription by RNA polymerase III	0.116917	-2.14629	6	4	0.00495663	3.61604e+19	Rpb5,Rpb8,Trf2,Rpb10
GO:0008348	negative regulation of antimicrobial humoral response	0.116917	-2.14629	6	4	0.00495663	4.24283e+19	Stat92E,cact,Jra,Usp2
GO:0010454	negative regulation of cell fate commitment	0.116917	-2.14629	6	4	0.00495663	3.66783e+19	chn,ed,alph,lqf
GO:0009059	macromolecule biosynthetic process	0.117048	-2.14517	186	73	0.0904585	33703,42614,35483,39383,44150,43594,42761,33686,3354921,39399,43532,38794,39108,36576,42550,34024,32909,41372,34412,31483,42994,50364,44205,41741,39338,34420,41823,41343,37922,45329,40932,2768916,42822,40415,44643,44226,42942,31228,36851,43573,33654,47218,32953,34309,34282,34109,31773,42635,41347,33571,42470,42464,35453,40060,41913,33271,34363,31009,40240,36387,43723,59151,34804,50139,42819,31613…	mRpL24,rdhB,Nipped-A,Atg12,RpS15Aa,RpS7,RpS3,mxt,Gfat1,app,RpS8,RpL18,RpS9,RpS23,E2f1,santa-maria,CG7990,RpL24-like,mRpS7,RpL35,Smg6,CG13364,spen,RpII15,RpL10Ab,RpS27A,GlyS,RpS25,Nurf-38,RpL12,mRpS9,CG33303,TfIIA-S,Rpb8,Cnx99A,Xbp1,Rpb10,tko,RpS15,RpL32,RpL27A,RpS14a,RpS10b,RpS2,GlcAT-S,PAPLA1,Trf2,pinta,RpL3,tim,RpS30,RpS20,RpL21,RpL26,alpha-Man-IIb,ninaA,eEF1delta,RpL36,eRF1,spt4,RpL6,mRpL36,Sm…
GO:0032006	regulation of TOR signaling	0.120396	-2.11697	20	10	0.0123916	4.01934e+50	CG14184,Atg1,RagC-D,Rheb,slmb,Pten,ATPsynD,AMPKalpha,E2f1,chrb
GO:0033993	response to lipid	0.120396	-2.11697	20	10	0.0123916	4.01553e+49	SREBP,Kr-h1,Trf2,Nurf-38,Jra,l(2)gl,Stat92E,Pak,Hydr2,rtp
GO:0010639	negative regulation of organelle organization	0.120396	-2.11697	20	10	0.0123916	4.11814e+49	hyd,Cip4,cpa,tmod,tacc,GABA-B-R2,spoon,Tango9,Pink1,ctrip
GO:0090263	positive regulation of canonical Wnt signaling pathway	0.120396	-2.11697	20	10	0.0123916	4.78774e+49	tws,Pp1alpha-96A,spen,Klp64D,hyd,flw,mts,Cow,Usp8,Diap1
GO:0042445	hormone metabolic process	0.120396	-2.11697	20	10	0.0123916	3.15814e+50	Marf,Est-6,Nep3,CG7675,CG9512,Pdh,scu,Jheh1,GstE14,Npc1a
GO:0017014	protein nitrosylation	0.122265	-2.10157	2	2	0.00247831	3572832545	Gapdh1,Gapdh2
GO:0046427	positive regulation of receptor signaling pathway via JAK-STAT	0.122265	-2.10157	2	2	0.00247831	3200934416	Imp,Cnot4
GO:0034284	response to monosaccharide	0.122265	-2.10157	2	2	0.00247831	3915043146	Ilp2,boss
GO:0051923	sulfation	0.122265	-2.10157	2	2	0.00247831	3774237743	St1,St3
GO:0010797	regulation of multivesicular body size involved in endosome transport	0.122265	-2.10157	2	2	0.00247831	3841842492	kst,AnxB9
GO:0006278	RNA-dependent DNA biosynthetic process	0.122265	-2.10157	2	2	0.00247831	3480442994	Smg5,Smg6
GO:0007259	receptor signaling pathway via JAK-STAT	0.122265	-2.10157	2	2	0.00247831	4242836102	Stat92E,RanBPM
GO:0048800	antennal morphogenesis	0.122265	-2.10157	2	2	0.00247831	3171739753	sn,Diap1
GO:0019433	triglyceride catabolic process	0.122265	-2.10157	2	2	0.00247831	3961132426	bmm,pdgy
GO:1904747	positive regulation of apoptotic process involved in development	0.122265	-2.10157	2	2	0.00247831	4255039454	E2f1,Atg1
GO:0046693	sperm storage	0.122265	-2.10157	2	2	0.00247831	4283239392	Gdh,Est-6
GO:0009746	response to hexose	0.122265	-2.10157	2	2	0.00247831	4314639150	boss,Ilp2
GO:1902389	ceramide 1-phosphate transport	0.122265	-2.10157	2	2	0.00247831	32475246587	CG6299,CG30392
GO:0060384	innervation	0.122265	-2.10157	2	2	0.00247831	4122541363	Mical,pros
GO:0045612	positive regulation of hemocyte differentiation	0.122265	-2.10157	2	2	0.00247831	3864336750	DnaJ-1,Mlf
GO:0006574	valine catabolic process	0.122265	-2.10157	2	2	0.00247831	3716630995	CG15093,CG17896
GO:0030708	germarium-derived female germ-line cyst encapsulation	0.122265	-2.10157	2	2	0.00247831	3853442504	Cip4,slmb
GO:0098711	iron ion import across plasma membrane	0.122265	-2.10157	2	2	0.00247831	4496546415	Fer2LCH,Fer1HCH
GO:0042219	cellular modified amino acid catabolic process	0.122265	-2.10157	2	2	0.00247831	3798837989	CG2811,Tina-1
GO:0007589	body fluid secretion	0.122265	-2.10157	2	2	0.00247831	3600334181	trpl,Dh31
GO:0071454	cellular response to anoxia	0.122265	-2.10157	2	2	0.00247831	3600343542	trpl,trp
GO:0045313	rhabdomere membrane biogenesis	0.122265	-2.10157	2	2	0.00247831	3638331816	Amph,Moe
GO:0030714	anterior/posterior axis specification, follicular epithelium	0.122265	-2.10157	2	2	0.00247831	4444832083	scrib,dlg1
GO:2000278	regulation of DNA biosynthetic process	0.122265	-2.10157	2	2	0.00247831	4299434804	Smg6,Smg5
GO:0009749	response to glucose	0.122265	-2.10157	2	2	0.00247831	4314639150	boss,Ilp2
GO:1904894	positive regulation of receptor signaling pathway via STAT	0.122265	-2.10157	2	2	0.00247831	3441632009	Cnot4,Imp
GO:0043697	cell dedifferentiation	0.122265	-2.10157	2	2	0.00247831	4136342428	pros,Stat92E
GO:1904746	negative regulation of apoptotic process involved in development	0.122265	-2.10157	2	2	0.00247831	4250441260	slmb,Bruce
GO:0033212	iron import into cell	0.122265	-2.10157	2	2	0.00247831	4641544965	Fer1HCH,Fer2LCH
GO:1902915	negative regulation of protein polyubiquitination	0.122265	-2.10157	2	2	0.00247831	4118140596	hyd,ctrip
GO:1900044	regulation of protein K63-linked ubiquitination	0.122265	-2.10157	2	2	0.00247831	4059641181	ctrip,hyd
GO:0030038	contractile actin filament bundle assembly	0.122265	-2.10157	2	2	0.00247831	3361941852	ed,Tm1
GO:0042572	retinol metabolic process	0.122265	-2.10157	2	2	0.00247831	4221139812	CG7675,Pdh
GO:1900045	negative regulation of protein K63-linked ubiquitination	0.122265	-2.10157	2	2	0.00247831	4059641181	ctrip,hyd
GO:0043550	regulation of lipid kinase activity	0.122265	-2.10157	2	2	0.00247831	3320343991	Pi3K21B,Pten
GO:0061541	rhabdomere morphogenesis	0.122265	-2.10157	2	2	0.00247831	42358326116	Ire1,tau
GO:0048644	muscle organ morphogenesis	0.122265	-2.10157	2	2	0.00247831	3231433619	up,ed
GO:0035627	ceramide transport	0.122265	-2.10157	2	2	0.00247831	24658732475	CG30392,CG6299
GO:0042066	perineurial glial growth	0.122265	-2.10157	2	2	0.00247831	3242846243	eag,poe
GO:0042691	positive regulation of crystal cell differentiation	0.122265	-2.10157	2	2	0.00247831	3675038643	Mlf,DnaJ-1
GO:0007004	telomere maintenance via telomerase	0.122265	-2.10157	2	2	0.00247831	4299434804	Smg6,Smg5
GO:1905153	regulation of membrane invagination	0.122265	-2.10157	2	2	0.00247831	3321938218	crq,drpr
GO:0046710	GDP metabolic process	0.122265	-2.10157	2	2	0.00247831	4486132083	sdt,dlg1
GO:1903391	regulation of adherens junction organization	0.122265	-2.10157	2	2	0.00247831	3853443991	Cip4,Pten
GO:0046692	sperm competition	0.122265	-2.10157	2	2	0.00247831	3939242832	Est-6,Gdh
GO:0090329	regulation of DNA-dependent DNA replication	0.122265	-2.10157	2	2	0.00247831	3357142550	tim,E2f1
GO:0006939	smooth muscle contraction	0.122265	-2.10157	2	2	0.00247831	3849044132	Chd64,slmo
GO:0031057	negative regulation of histone modification	0.122265	-2.10157	2	2	0.00247831	4118140596	hyd,ctrip
GO:0006627	protein processing involved in protein targeting to mitochondrion	0.122265	-2.10157	2	2	0.00247831	4180039846	UQCR-C1,UQCR-C2
GO:0032878	regulation of establishment or maintenance of cell polarity	0.122265	-2.10157	2	2	0.00247831	4250433156	slmb,l(2)gl
GO:0046596	regulation of viral entry into host cell	0.122265	-2.10157	2	2	0.00247831	3390536040	Sec61alpha,TER94
GO:0045849	negative regulation of nurse cell apoptotic process	0.122265	-2.10157	2	2	0.00247831	4126042504	Bruce,slmb
GO:0043696	dedifferentiation	0.122265	-2.10157	2	2	0.00247831	4136342428	pros,Stat92E
GO:0006646	phosphatidylethanolamine biosynthetic process	0.122265	-2.10157	2	2	0.00247831	3541734063	CG2201,CG7149
GO:0006842	tricarboxylic acid transport	0.122265	-2.10157	2	2	0.00247831	400493772221	Indy,sea
GO:0004001	adenosine kinase activity	0.122265	-2.10157	2	2	0.00247831	3947944750	AdenoK,Ady43A
GO:0045850	positive regulation of nurse cell apoptotic process	0.122265	-2.10157	2	2	0.00247831	4255039454	E2f1,Atg1
GO:0032528	microvillus organization	0.122265	-2.10157	2	2	0.00247831	4369031717	chp,sn
GO:0043551	regulation of phosphatidylinositol 3-kinase activity	0.122265	-2.10157	2	2	0.00247831	3320343991	Pi3K21B,Pten
GO:0019888	protein phosphatase regulator activity	0.122265	-2.10157	2	2	0.00247831	276894047877	Pp2A-29B,tws
GO:2000425	regulation of apoptotic cell clearance	0.122265	-2.10157	2	2	0.00247831	3212434976	prtp,CaBP1
GO:0061060	negative regulation of peptidoglycan recognition protein signaling pathway	0.122265	-2.10157	2	2	0.00247831	3313234778	Usp2,TM9SF4
GO:0071596	ubiquitin-dependent protein catabolic process via the N-end rule pathway	0.122265	-2.10157	2	2	0.00247831	3268731713	Ubr1,Ubr3
GO:0042689	regulation of crystal cell differentiation	0.122265	-2.10157	2	2	0.00247831	3675038643	Mlf,DnaJ-1
GO:0055089	fatty acid homeostasis	0.122265	-2.10157	2	2	0.00247831	4066440155	Itp-r83A,SREBP
GO:0071422	succinate transmembrane transport	0.122265	-2.10157	2	2	0.00247831	4004941640	Indy,Dic1
GO:0003053	circadian regulation of heart rate	0.122265	-2.10157	2	2	0.00247831	3357138872	tim,Clk
GO:1905268	negative regulation of chromatin organization	0.122265	-2.10157	2	2	0.00247831	4118140596	hyd,ctrip
GO:0033183	negative regulation of histone ubiquitination	0.122265	-2.10157	2	2	0.00247831	4059641181	ctrip,hyd
GO:1901315	negative regulation of histone H2A K63-linked ubiquitination	0.122265	-2.10157	2	2	0.00247831	4118140596	hyd,ctrip
GO:0046598	positive regulation of viral entry into host cell	0.122265	-2.10157	2	2	0.00247831	3390536040	Sec61alpha,TER94
GO:0030388	fructose 1,6-bisphosphate metabolic process	0.122265	-2.10157	2	2	0.00247831	3526536060	fbp,Pfk
GO:0015746	citrate transport	0.122265	-2.10157	2	2	0.00247831	377222140049	sea,Indy
GO:0007320	insemination	0.122265	-2.10157	2	2	0.00247831	3939242832	Est-6,Gdh
GO:0006000	fructose metabolic process	0.122265	-2.10157	2	2	0.00247831	3293835265	Pfrx,fbp
GO:0000082	G1/S transition of mitotic cell cycle	0.122265	-2.10157	2	2	0.00247831	11733242550	Rheb,E2f1
GO:0010039	response to iron ion	0.122265	-2.10157	2	2	0.00247831	4641544965	Fer1HCH,Fer2LCH
GO:2000427	positive regulation of apoptotic cell clearance	0.122265	-2.10157	2	2	0.00247831	3497632124	CaBP1,prtp
GO:1900117	regulation of execution phase of apoptosis	0.122265	-2.10157	2	2	0.00247831	3975342550	Diap1,E2f1
GO:0035605	peptidyl-cysteine S-nitrosylase activity	0.122265	-2.10157	2	2	0.00247831	3572832545	Gapdh1,Gapdh2
GO:0043101	purine-containing compound salvage	0.122265	-2.10157	2	2	0.00247831	3235239479	AMPdeam,AdenoK
GO:0006102	isocitrate metabolic process	0.122265	-2.10157	2	2	0.00247831	4310244291	CG5028,Idh
GO:0010636	positive regulation of mitochondrial fusion	0.122265	-2.10157	2	2	0.00247831	3158136578	Marf,Opa1
GO:0008053	mitochondrial fusion	0.122265	-2.10157	2	2	0.00247831	3158136578	Marf,Opa1
GO:0034982	mitochondrial protein processing	0.122265	-2.10157	2	2	0.00247831	3984641800	UQCR-C2,UQCR-C1
GO:0097696	receptor signaling pathway via STAT	0.122265	-2.10157	2	2	0.00247831	3610242428	RanBPM,Stat92E
GO:0006833	water transport	0.122265	-2.10157	2	2	0.00247831	3623641428	Drip,ClC-a
GO:0008643	carbohydrate transport	0.122265	-2.10157	2	2	0.00247831	3967036248	CG7272,Tret1-1
GO:0033182	regulation of histone ubiquitination	0.122265	-2.10157	2	2	0.00247831	4118140596	hyd,ctrip
GO:0018119	peptidyl-cysteine S-nitrosylation	0.122265	-2.10157	2	2	0.00247831	3572832545	Gapdh1,Gapdh2
GO:1990461	detoxification of iron ion	0.122265	-2.10157	2	2	0.00247831	4496546415	Fer2LCH,Fer1HCH
GO:0051036	regulation of endosome size	0.122265	-2.10157	2	2	0.00247831	3841842492	kst,AnxB9
GO:0048104	establishment of body hair or bristle planar orientation	0.122265	-2.10157	2	2	0.00247831	4420539399	spen,app
GO:0032954	regulation of cytokinetic process	0.122265	-2.10157	2	2	0.00247831	3595044289	Pkn,flw
GO:0002032	desensitization of G protein-coupled receptor signaling pathway by arrestin	0.122265	-2.10157	2	2	0.00247831	3507838993	Arr1,Arr2
GO:0031397	negative regulation of protein ubiquitination	0.122265	-2.10157	2	2	0.00247831	4059641181	ctrip,hyd
GO:0032210	regulation of telomere maintenance via telomerase	0.122265	-2.10157	2	2	0.00247831	3480442994	Smg5,Smg6
GO:1901314	regulation of histone H2A K63-linked ubiquitination	0.122265	-2.10157	2	2	0.00247831	4118140596	hyd,ctrip
GO:0010833	telomere maintenance via telomere lengthening	0.122265	-2.10157	2	2	0.00247831	4299434804	Smg6,Smg5
GO:1902769	regulation of choline O-acetyltransferase activity	0.122265	-2.10157	2	2	0.00247831	4958037617	Invadolysin,blw
GO:1903573	negative regulation of response to endoplasmic reticulum stress	0.122265	-2.10157	2	2	0.00247831	3657838936	Opa1,BI-1
GO:0015701	bicarbonate transport	0.122265	-2.10157	2	2	0.00247831	3914734005	CG8177,Ndae1
GO:0010796	regulation of multivesicular body size	0.122265	-2.10157	2	2	0.00247831	3841842492	kst,AnxB9
GO:1905207	regulation of cardiocyte differentiation	0.122265	-2.10157	2	2	0.00247831	3995838846	Nedd4,lqf
GO:0061059	positive regulation of peptidoglycan recognition protein signaling pathway	0.122265	-2.10157	2	2	0.00247831	3618341087	Listericin,Rel
GO:1902388	ceramide 1-phosphate transfer activity	0.122265	-2.10157	2	2	0.00247831	32475246587	CG6299,CG30392
GO:0050771	negative regulation of axonogenesis	0.122265	-2.10157	2	2	0.00247831	4136332119	pros,bif
GO:0004385	guanylate kinase activity	0.122265	-2.10157	2	2	0.00247831	4486132083	sdt,dlg1
GO:0008377	light-induced release of internally sequestered calcium ion	0.122265	-2.10157	2	2	0.00247831	4354231376	trp,norpA
GO:0061687	detoxification of inorganic compound	0.122265	-2.10157	2	2	0.00247831	4496546415	Fer2LCH,Fer1HCH
GO:0044843	cell cycle G1/S phase transition	0.122265	-2.10157	2	2	0.00247831	42550117332	E2f1,Rheb
GO:1900101	regulation of endoplasmic reticulum unfolded protein response	0.122265	-2.10157	2	2	0.00247831	3893644226	BI-1,Xbp1
GO:0032204	regulation of telomere maintenance	0.122265	-2.10157	2	2	0.00247831	3480442994	Smg5,Smg6
GO:1904502	regulation of lipophagy	0.122265	-2.10157	2	2	0.00247831	43904117332	AMPKalpha,Rheb
GO:0006275	regulation of DNA replication	0.122265	-2.10157	2	2	0.00247831	4255033571	E2f1,tim
GO:0032091	negative regulation of protein binding	0.122265	-2.10157	2	2	0.00247831	3899335078	Arr2,Arr1
GO:1904356	regulation of telomere maintenance via telomere lengthening	0.122265	-2.10157	2	2	0.00247831	4299434804	Smg6,Smg5
GO:0060099	regulation of phagocytosis, engulfment	0.122265	-2.10157	2	2	0.00247831	3321938218	crq,drpr
GO:0006188	IMP biosynthetic process	0.122265	-2.10157	2	2	0.00247831	4297332352	CG11089,AMPdeam
GO:0015141	succinate transmembrane transporter activity	0.122265	-2.10157	2	2	0.00247831	4004941640	Indy,Dic1
GO:0072321	chaperone-mediated protein transport	0.122265	-2.10157	2	2	0.00247831	437988432081	CG34132,Tim8
GO:0048139	female germ-line cyst encapsulation	0.122265	-2.10157	2	2	0.00247831	3853442504	Cip4,slmb
GO:2001251	negative regulation of chromosome organization	0.122265	-2.10157	2	2	0.00247831	4118140596	hyd,ctrip
GO:0120009	intermembrane lipid transfer	0.122265	-2.10157	2	2	0.00247831	24658732475	CG30392,CG6299
GO:0015744	succinate transport	0.122265	-2.10157	2	2	0.00247831	4164040049	Dic1,Indy
GO:0055081	anion homeostasis	0.122265	-2.10157	2	2	0.00247831	4015540664	SREBP,Itp-r83A
GO:0006457	protein folding	0.123297	-2.09316	35	16	0.0198265	3.25163e+79	CG8206,Tpr2,CG11267,mlt,Hsc70-4,Tbce,DnaJ-H,DnaJ-1,Hsc70-5,ninaA,Csp,Cnx99A,Calr,sel,CG3061,CG7409
GO:0048515	spermatid differentiation	0.123297	-2.09316	35	16	0.0198265	3.77984e+79	Nap1,alphaTub84D,mlt,milt,Bruce,Taz,hyd,Diap1,Hydr2,poe,ctp,Npc1a,Dredd,porin,Klp64D,eIF4G2
GO:0031400	negative regulation of protein modification process	0.123297	-2.09316	35	16	0.0198265	3.13323e+79	Rala,ics,mts,chinmo,ATPsynD,hyd,ctrip,l(2)gl,flw,cpa,Pten,raw,puc,Mkp3,alph,CG17059
GO:0006644	phospholipid metabolic process	0.123297	-2.09316	35	16	0.0198265	3.13764e+80	norpA,Inos,Taz,CG3530,CG30503,mino,laza,Pi3K21B,Ipp,CG2201,Pten,CG7149,CG14945,CG3009,CG7990,rdgB
GO:0045216	cell-cell junction organization	0.124317	-2.08492	30	14	0.0173482	3.84183e+71	kst,shakB,Cont,Mcr,dlg1,btsz,pyd,sdt,Lac,CG44325,scrib,sinu,Pak,l(2)gl
GO:0051186	cofactor metabolic process	0.124988	-2.07953	53	23	0.0285006	3.89724e+118	GstO3,GstD1,l(3)02640,scu,CG17691,CG1441,GstE6,Prx5,wat,CG7920,CG5037,CG12116,Ho,ATPCL,se,pr,CG12016,CG12118,Gdh,GstE14,Prx3,Pu,pdgy
GO:0072350	tricarboxylic acid metabolic process	0.126098	-2.0707	4	3	0.00371747	367604429143102	ATPCL,Idh,CG5028
GO:0010676	positive regulation of cellular carbohydrate metabolic process	0.126098	-2.0707	4	3	0.00371747	333864182339454	GlyP,GlyS,Atg1
GO:0001054	RNA polymerase I activity	0.126098	-2.0707	4	3	0.00371747	429423616040415	Rpb10,Rpb5,Rpb8
GO:0006805	xenobiotic metabolic process	0.126098	-2.0707	4	3	0.00371747	377423774335543	St1,St3,Cyp6w1
GO:0051271	negative regulation of cellular component movement	0.126098	-2.0707	4	3	0.00371747	439913785038059	Pten,Rap2l,Ptpmeg
GO:0019368	fatty acid elongation, unsaturated fatty acid	0.126098	-2.0707	4	3	0.00371747	3261484265539860	CG31523,CG5326,Baldspot
GO:1900425	negative regulation of defense response to bacterium	0.126098	-2.0707	4	3	0.00371747	347783313242821	TM9SF4,Usp2,Pli
GO:0010907	positive regulation of glucose metabolic process	0.126098	-2.0707	4	3	0.00371747	394543338641823	Atg1,GlyP,GlyS
GO:0071324	cellular response to disaccharide stimulus	0.126098	-2.0707	4	3	0.00371747	418233576133524	GlyS,ACC,FASN1
GO:0045913	positive regulation of carbohydrate metabolic process	0.126098	-2.0707	4	3	0.00371747	394544182333386	Atg1,GlyS,GlyP
GO:0046033	AMP metabolic process	0.126098	-2.0707	4	3	0.00371747	323523947944750	AMPdeam,AdenoK,Ady43A
GO:0071329	cellular response to sucrose stimulus	0.126098	-2.0707	4	3	0.00371747	357613352441823	ACC,FASN1,GlyS
GO:0006517	protein deglycosylation	0.126098	-2.0707	4	3	0.00371747	385283327141913	Hexo1,ninaA,alpha-Man-IIb
GO:0030336	negative regulation of cell migration	0.126098	-2.0707	4	3	0.00371747	439913785038059	Pten,Rap2l,Ptpmeg
GO:1903035	negative regulation of response to wounding	0.126098	-2.0707	4	3	0.00371747	404594399136905	Csp,Pten,Cbp53E
GO:0019896	axonal transport of mitochondrion	0.126098	-2.0707	4	3	0.00371747	456833158142845	milt,Marf,Miro
GO:0001055	RNA polymerase II activity	0.126098	-2.0707	4	3	0.00371747	429424041536160	Rpb10,Rpb8,Rpb5
GO:0034625	fatty acid elongation, monounsaturated fatty acid	0.126098	-2.0707	4	3	0.00371747	3261483986042650	CG31523,Baldspot,CG5326
GO:0032200	telomere organization	0.126098	-2.0707	4	3	0.00371747	377983480442994	Nap1,Smg5,Smg6
GO:0019367	fatty acid elongation, saturated fatty acid	0.126098	-2.0707	4	3	0.00371747	4265539860326140	CG5326,Baldspot,CG31523
GO:0000038	very long-chain fatty acid metabolic process	0.126098	-2.0707	4	3	0.00371747	3261483986042650	CG31523,Baldspot,CG5326
GO:0007604	phototransduction, UV	0.126098	-2.0707	4	3	0.00371747	398874239834012	Rh4,Rh3,ninaC
GO:0004467	long-chain fatty acid-CoA ligase activity	0.126098	-2.0707	4	3	0.00371747	324264411740056	pdgy,bgm,CG3961
GO:0051100	negative regulation of binding	0.126098	-2.0707	4	3	0.00371747	335713899335078	tim,Arr2,Arr1
GO:0016062	adaptation of rhodopsin mediated signaling	0.126098	-2.0707	4	3	0.00371747	368973401238993	inaC,ninaC,Arr2
GO:0048067	cuticle pigmentation	0.126098	-2.0707	4	3	0.00371747	387463741531863	ple,Pu,t
GO:0021675	nerve development	0.126098	-2.0707	4	3	0.00371747	413634122540553	pros,Mical,Cont
GO:0070875	positive regulation of glycogen metabolic process	0.126098	-2.0707	4	3	0.00371747	333864182339454	GlyP,GlyS,Atg1
GO:0033617	mitochondrial respiratory chain complex IV assembly	0.126098	-2.0707	4	3	0.00371747	5.74042e+16	CG34242,CG17996,COX6B
GO:0036367	light adaption	0.126098	-2.0707	4	3	0.00371747	340123899336897	ninaC,Arr2,inaC
GO:0042761	very long-chain fatty acid biosynthetic process	0.126098	-2.0707	4	3	0.00371747	3261484265539860	CG31523,CG5326,Baldspot
GO:0007620	copulation	0.126098	-2.0707	4	3	0.00371747	393924283233571	Est-6,Gdh,tim
GO:1905880	negative regulation of oogenesis	0.126098	-2.0707	4	3	0.00371747	412603805942504	Bruce,Ptpmeg,slmb
GO:0003899	DNA-directed 5'-3' RNA polymerase activity	0.126098	-2.0707	4	3	0.00371747	417414294236160	RpII15,Rpb10,Rpb5
GO:0015909	long-chain fatty acid transport	0.126098	-2.0707	4	3	0.00371747	3299224665631400	Pmp70,CG30503,CG3009
GO:0071466	cellular response to xenobiotic stimulus	0.126098	-2.0707	4	3	0.00371747	377423554337743	St1,Cyp6w1,St3
GO:0000723	telomere maintenance	0.126098	-2.0707	4	3	0.00371747	348044299437798	Smg5,Smg6,Nap1
GO:0015908	fatty acid transport	0.126098	-2.0707	4	3	0.00371747	3299224665631400	Pmp70,CG30503,CG3009
GO:0008033	tRNA processing	0.126098	-2.0707	4	3	0.00371747	2.46551e+17	CG30343,scu,Rpp20
GO:2000146	negative regulation of cell motility	0.126098	-2.0707	4	3	0.00371747	378504399138059	Rap2l,Pten,Ptpmeg
GO:0071711	basement membrane organization	0.126098	-2.0707	4	3	0.00371747	412484069443991	Timp,Sec23,Pten
GO:0001056	RNA polymerase III activity	0.126098	-2.0707	4	3	0.00371747	361604041542942	Rpb5,Rpb8,Rpb10
GO:0034626	fatty acid elongation, polyunsaturated fatty acid	0.126098	-2.0707	4	3	0.00371747	4265539860326140	CG5326,Baldspot,CG31523
GO:0046329	negative regulation of JNK cascade	0.128492	-2.05189	13	7	0.0086741	4.09583e+34	puc,Rala,ics,raw,flw,cpa,alph
GO:0004725	protein tyrosine phosphatase activity	0.128492	-2.05189	13	7	0.0086741	3.77074e+34	CG3530,Pten,CG13197,CG3632,puc,Lar,Ptpmeg
GO:0032543	mitochondrial translation	0.128492	-2.05189	13	7	0.0086741	3.44123e+34	mRpS7,mRpL24,mRpL36,mRpS9,mRpL30,CG12848,tko
GO:0046165	alcohol biosynthetic process	0.128492	-2.05189	13	7	0.0086741	3.74153e+34	Pu,l(1)G0196,Inos,Marf,norpA,CG12116,pr
GO:0070303	negative regulation of stress-activated protein kinase signaling cascade	0.128492	-2.05189	13	7	0.0086741	3.13323e+34	Rala,ics,puc,flw,cpa,alph,raw
GO:0043467	regulation of generation of precursor metabolites and energy	0.128492	-2.05189	13	7	0.0086741	3.94544e+34	Atg1,Gbs-70E,Pink1,Pgk,GlyP,Ilp2,GlyS
GO:1900424	regulation of defense response to bacterium	0.128492	-2.05189	13	7	0.0086741	4.16504e+34	GILT1,Listericin,Rel,Usp2,TM9SF4,Pli,Dredd
GO:0035335	peptidyl-tyrosine dephosphorylation	0.128492	-2.05189	13	7	0.0086741	3.77074e+34	CG3530,Pten,CG13197,puc,CG3632,Lar,Ptpmeg
GO:0007601	visual perception	0.128492	-2.05189	13	7	0.0086741	3.98873e+34	Rh4,t,Rh3,trpl,sif,boss,trp
GO:0051646	mitochondrion localization	0.128492	-2.05189	13	7	0.0086741	3.18841e+35	Bsg,milt,Pink1,Miro,larp,Marf,clu
GO:0032873	negative regulation of stress-activated MAPK cascade	0.128492	-2.05189	13	7	0.0086741	4.09583e+34	puc,Rala,ics,raw,flw,cpa,alph
GO:0046486	glycerolipid metabolic process	0.132747	-2.01931	43	19	0.023544	3.24264e+94	pdgy,Pten,CG2201,CG7149,CG17646,CG14945,Hydr2,CG7990,rdgB,norpA,ACC,CG3530,Taz,mino,bmm,Ipp,FASN1,mdy,Pi3K21B
GO:0034330	cell junction organization	0.132747	-2.01931	43	19	0.023544	3.30624e+96	shakB,alpha-Cat,dlg1,Lac,Rac2,Csk,Mcr,Cont,kst,awd,btsz,pyd,CG44325,sdt,cindr,scrib,sinu,l(2)gl,Pak
GO:0072594	establishment of protein localization to organelle	0.136182	-1.99377	38	17	0.0210657	3.88194e+88	Sec63,Tim10,Srp9,Karybeta3,tim,Ran,UQCR-C1,UQCR-C2,CG34132,Sec61alpha,Tim8,Tim9a,scrib,Tom40,Tim23,Tom20,CG8206
GO:0031348	negative regulation of defense response	0.137755	-1.98228	18	9	0.0111524	4.28214e+46	Pli,Prx5,Spn88Ea,cact,TM9SF4,GlyP,Rala,Tim10,Usp2
GO:0048608	reproductive structure development	0.137755	-1.98228	18	9	0.0111524	3.68974e+44	inaC,scaf,puc,hyd,ct,raw,Invadolysin,Rab5,lola
GO:0009063	cellular amino acid catabolic process	0.137755	-1.98228	18	9	0.0111524	4.28324e+46	Gdh,P5CDh1,Gad1,CG5955,CG17896,CG17691,CG15093,TER94,CG7430
GO:0045187	regulation of circadian sleep/wake cycle, sleep	0.137755	-1.98228	18	9	0.0111524	3.28173e+44	CrebB,homer,cue,Fbxl4,Clk,bgm,tim,cry,Ih
GO:0061458	reproductive system development	0.137755	-1.98228	18	9	0.0111524	3.55054e+44	scaf,inaC,puc,raw,hyd,ct,lola,Invadolysin,Rab5
GO:0008593	regulation of Notch signaling pathway	0.14087	-1.95992	23	11	0.0136307	3.79614e+54	Eps-15,scrib,Nedd4,Kul,l(2)gl,Fkbp14,dlg1,ed,lqf,pyd,cue
GO:0030177	positive regulation of Wnt signaling pathway	0.14087	-1.95992	23	11	0.0136307	4.27334e+54	Cow,Usp8,Diap1,spen,Pp1alpha-96A,tws,flw,Klp64D,hyd,Dyrk2,mts
GO:0007315	pole plasm assembly	0.14087	-1.95992	23	11	0.0136307	4.59314e+56	spir,glo,scrib,cnc,par-1,slmb,Moe,Tm1,gus,dlg1,bic
GO:1901137	carbohydrate derivative biosynthetic process	0.143085	-1.94431	59	25	0.0309789	3.94794e+130	AdenoK,ATPsynD,Adk2,ATPsynCF6,awd,CG17691,ATPsynbeta,ATPsyngamma,AMPdeam,rut,Ady43A,ATPsynB,Gfat1,GlcAT-S,ATPsynG,CG11089,CG33303,pdgy,blw,ATPsyndelta,Tpi,CG7990,ATPCL,Gycalpha99B,sun
GO:0009410	response to xenobiotic stimulus	0.147804	-1.91187	11	6	0.00743494	3.29484e+29	Tao,St1,Cyp6w1,St3,Clk,Pka-R2
GO:0009055	electron transfer activity	0.147804	-1.91187	11	6	0.00743494	4.35154e+29	CG7834,CG7430,CG6523,SdhB,wal,Cyt-c-p
GO:0048260	positive regulation of receptor-mediated endocytosis	0.147804	-1.91187	11	6	0.00743494	3.50515e+29	BicD,Pkc53E,inaC,norpA,cindr,Nedd4
GO:0036294	cellular response to decreased oxygen levels	0.147804	-1.91187	11	6	0.00743494	4.56684e+29	Vha68-1,trpl,Hph,trp,Tom40,Eip93F
GO:0034333	adherens junction assembly	0.147804	-1.91187	11	6	0.00743494	4.48614e+29	sdt,pyd,scrib,cindr,alpha-Cat,kst
GO:0035214	eye-antennal disc development	0.147804	-1.91187	11	6	0.00743494	3.97533e+29	Diap1,sn,chinmo,hyd,ct,Stat92E
GO:0006936	muscle contraction	0.147804	-1.91187	11	6	0.00743494	3.49504e+29	Ca-alpha1D,slmo,Chd64,Tm1,up,bt
GO:0061919	process utilizing autophagic mechanism	0.148552	-1.90682	41	18	0.0223048	2.76894e+92	Pp2A-29B,Pink1,Atg1,ref(2)P,comt,ctp,Pten,Vha100-1,CG5676,TER94,Tango5,GlyS,Vamp7,Atg12,mts,Hsc70-4,lqf,Hsc70-5
GO:0006914	autophagy	0.148552	-1.90682	41	18	0.0223048	3.16074e+92	Pink1,Atg1,Pp2A-29B,ctp,comt,ref(2)P,Pten,CG5676,Vha100-1,GlyS,Vamp7,Tango5,TER94,mts,Atg12,Hsc70-4,Hsc70-5,lqf
GO:0008610	lipid biosynthetic process	0.148756	-1.90545	54	23	0.0285006	4.33504e+115	mino,CG3961,GlcAT-S,FASN1,mdy,norpA,ND-ACP,ACC,CG31523,SREBP,Inos,Taz,Baldspot,CG7149,Hydr2,CG7990,ATPCL,Marf,bgm,CG5326,Npc1a,GstE14,CG2201
GO:0044283	small molecule biosynthetic process	0.153559	-1.87367	70	29	0.0359356	3.74154e+146	Pu,GstE14,bgm,Npc1a,CG5326,Tpi,pr,Got1,Marf,ATPCL,Baldspot,CG12116,Hydr2,ACC,Inos,CG31523,SREBP,Adi1,AdenoK,Pgk,Pgi,norpA,fbp,awd,ND-ACP,l(1)G0196,Gad1,CG3961,CG1673
GO:0050795	regulation of behavior	0.154552	-1.86722	49	21	0.0260223	3.81744e+104	cue,Ide,cry,tim,bgm,Ih,homer,Est-6,CHOp24,Pink1,Drip,Fbxl4,Clk,Ilp2,Itp-r83A,Dh31,me31B,rut,CrebB,p24-1,5-HT2A
GO:0034660	ncRNA metabolic process	0.156883	-1.85225	31	14	0.0173482	4.35942e+72	RpS7,CG30343,RpL7A,Rpp20,CG7637,scu,RpL35,mino,CG4364,mRpS9,RpS8,Dbp45A,RpS14a,RpL10Ab
GO:0010623	programmed cell death involved in cell development	0.156883	-1.85225	31	14	0.0173482	3.16074e+69	Pink1,Atg1,BI-1,Pak,ctp,drpr,l(2)gl,TER94,lola,Atg12,E2f1,Mdh2,Trf2,Itp-r83A
GO:0033554	cellular response to stress	0.158038	-1.84492	151	59	0.0731103	44936,35793,40596,42743,36447,42761,34655,44039,39383,34089,42186,40155,35483,35594,42358,33271,40958,3771951,43542,39675,37800,31581,41707,41166,44117,33571,42481,40633,43991,42109,38613,36243,44978,38413,36057,36003,41823,43431,41840,34380,42267,43904,41260,41181,41741,41087,40664,36583,44291,38936,44226,35984,39454,40791,38831,44643,32948,31220,45668	Eip93F,RagC-D,ctrip,cnc,GLaz,RpS3,CG5446,Pak,Atg12,Sirup,14-3-3epsilon,SREBP,Nipped-A,koi,Ire1,ninaA,puc,Prx5,trp,Eip71CD,kcc,Marf,CG3061,Calr,bgm,tim,Calx,Hph,Pten,Prx3,Uev1A,CG9005,Tom40,PHGPx,Jra,trpl,GlyS,CG11842,Hsc70-4,CYLD,Xrp1,AMPKalpha,Bruce,hyd,RpII15,Rel,Itp-r83A,Hsc70-5,Idh,BI-1,Xbp1,CG1814,Atg1,godzilla,Rac2,Cnx99A,Tao,Ilp6,Vha68-1
GO:0035330	regulation of hippo signaling	0.15819	-1.84396	16	8	0.00991326	3.55763e+43	Mob4,Pp2A-29B,par-1,Csk,Tao,mts,ed,14-3-3epsilon
GO:0051124	synaptic growth at neuromuscular junction	0.15977	-1.83402	26	12	0.0148699	3.20094e+61	Imp,jeb,Nrx-1,dlg1,Pdk1,Ten-m,caz,Jra,wit,Lar,par-1,Atg1
GO:0042051	compound eye photoreceptor development	0.166278	-1.79409	39	17	0.0210657	4.60153e+85	tutl,bdl,Syn2,tau,lola,Pten,Moe,Cpn,jeb,Lar,mbl,Amph,grh,Ten-m,boss,Ire1,chp
GO:0006520	cellular amino acid metabolic process	0.166278	-1.79409	39	17	0.0210657	3.45544e+87	CG6287,Hph,Gdh,Eip71CD,CG7430,ple,Got1,CG15093,CG1461,Adi1,P5CDh1,TER94,CG17691,CG5955,Gad1,CG17896,CG1673
GO:0002682	regulation of immune system process	0.168889	-1.77851	76	31	0.0384139	4.28215e+156	Pli,Spn88Ea,Rm62,Jra,Nurf-38,me31B,cpo,CYLD,Rala,crq,DnaJ-1,Pkc53E,Rel,Pitslre,Prx5,puc,smt3,Stat92E,cact,Rac2,GlyP,Ide,Cyt-b5,E2f1,Dredd,Pp1alpha-96A,Tim10,Arf79F,Pten,Usp2,Mlf
GO:0016573	histone acetylation	0.17095	-1.76638	9	5	0.00619579	4.86324e+24	Act87E,trx,Nipped-A,tth,san
GO:0042180	cellular ketone metabolic process	0.17095	-1.76638	9	5	0.00619579	3.27893e+24	scu,Npc1a,GstE14,CG9512,Marf
GO:0044247	cellular polysaccharide catabolic process	0.17095	-1.76638	9	5	0.00619579	4.05244e+24	beta-Man,Atg1,Atg12,GlyS,GlyP
GO:0006475	internal protein amino acid acetylation	0.17095	-1.76638	9	5	0.00619579	3.23184e+24	tth,san,Nipped-A,trx,Act87E
GO:0045467	R7 cell development	0.17095	-1.76638	9	5	0.00619579	4.45484e+24	lola,Ten-m,tutl,Lar,bdl
GO:0018393	internal peptidyl-lysine acetylation	0.17095	-1.76638	9	5	0.00619579	3.54834e+24	Nipped-A,trx,tth,san,Act87E
GO:0000272	polysaccharide catabolic process	0.17095	-1.76638	9	5	0.00619579	4.18233e+24	GlyS,GlyP,beta-Man,Atg1,Atg12
GO:0009744	response to sucrose	0.17095	-1.76638	9	5	0.00619579	3.60604e+24	Pfk,PyK,FASN1,ACC,GlyS
GO:0035167	larval lymph gland hemopoiesis	0.17095	-1.76638	9	5	0.00619579	4.45484e+24	lola,CG1129,E2f1,RpS8,Stat92E
GO:0035166	post-embryonic hemopoiesis	0.17095	-1.76638	9	5	0.00619579	4.25504e+24	E2f1,CG1129,lola,RpS8,Stat92E
GO:0030011	maintenance of cell polarity	0.17095	-1.76638	9	5	0.00619579	4.30034e+24	veli,alc,Sec23,tws,AnxB9
GO:0018394	peptidyl-lysine acetylation	0.17095	-1.76638	9	5	0.00619579	4.86323e+24	Act87E,tth,san,Nipped-A,trx
GO:0031345	negative regulation of cell projection organization	0.17095	-1.76638	9	5	0.00619579	3.73874e+24	cpa,Pten,Kr-h1,bif,pros
GO:0045571	negative regulation of imaginal disc growth	0.17095	-1.76638	9	5	0.00619579	4.39913e+24	Pten,l(2)gl,Csk,dlg1,scrib
GO:0006473	protein acetylation	0.17095	-1.76638	9	5	0.00619579	4.86323e+24	Act87E,tth,san,trx,Nipped-A
GO:0048732	gland development	0.171809	-1.76137	47	20	0.0247831	4.05993e+101	CG1129,btsz,Itp-r83A,l(2)gl,h,Pak,Mdh2,E2f1,lola,Pten,raw,RpS8,jeb,Trf2,BI-1,NetB,drpr,Rac2,Stat92E,ctp
GO:0042461	photoreceptor cell development	0.171809	-1.76137	47	20	0.0247831	3.62954e+101	jeb,Cpn,Moe,Pten,lola,csw,tau,Syn2,bdl,tutl,chp,Ire1,sdt,boss,Ten-m,grh,Amph,mbl,Lar,Bsg
GO:0060627	regulation of vesicle-mediated transport	0.176387	-1.73507	63	26	0.0322181	4.10874e+129	Rel,pyd,sdt,Pkc53E,ClC-b,GABA-B-R2,crq,Nrx-1,Rab5,norpA,Syx1A,sky,CaBP1,BicD,scrib,cindr,Rab10,Moe,Arf79F,prtp,Tao,tim,inaC,Sec23,drpr,Nedd4
GO:0034470	ncRNA processing	0.17724	-1.73025	29	13	0.016109	4.35942e+67	RpS7,CG30343,scu,CG7637,RpL7A,Rpp20,RpL35,mRpS9,CG4364,RpS8,RpS14a,Dbp45A,RpL10Ab
GO:0006915	apoptotic process	0.17724	-1.73025	29	13	0.016109	4.23584e+64	Ire1,E2f1,Tao,crq,chrb,Dredd,lola,Miro,Acn,Diap1,ninaA,mbl,Atg1
GO:0006629	lipid metabolic process	0.178257	-1.72453	125	49	0.0607187	32340,32909,31581,34623,33354,34063,43991,251984,44117,42364,34024,32419,43492,41701,40468,36252,44887,40056,36447,43350,34282,39611,32789,246656,37707,36405,35671,40155,31376,38154,39812,31402,36760,33532,39860,36467,35417,32426,42655,34358,42211,33524,33203,34152,117332,35761,326148,41275,43904	rdgB,CG7990,Marf,CG14945,CG17646,CG7149,Pten,Jheh1,bgm,Arc42,santa-maria,CG9512,CG7582,Ipp,laza,wal,mdy,CG3961,GLaz,mino,GlcAT-S,bmm,scu,CG30503,CG3530,Taz,Inos,SREBP,norpA,ND-ACP,Pdh,CG3009,ATPCL,Hydr2,Baldspot,GstE14,CG2201,pdgy,CG5326,Npc1a,CG7675,FASN1,Pi3K21B,CG17292,Rheb,ACC,CG31523,CG14688,AMPKalpha
GO:0007622	rhythmic behavior	0.178917	-1.72084	42	18	0.0223048	3.37594e+89	vri,cry,tim,dlg1,unc80,Ih,Fer2LCH,to,unc79,ITP,Ilp2,Clk,cu,slmb,qsm,Pka-R2,CkIIalpha,CrebB
GO:0042753	positive regulation of circadian rhythm	0.182487	-1.70108	14	7	0.0086741	3.39444e+34	homer,cue,Ih,Dh31,bgm,ctrip,Pink1
GO:0033108	mitochondrial respiratory chain complex assembly	0.182487	-1.70108	14	7	0.0086741	3.49983e+36	CG17996,UQCR-14,Sirup,CG34242,ND-B12,ND-23,COX6B
GO:0062012	regulation of small molecule metabolic process	0.182487	-1.70108	14	7	0.0086741	3.95884e+34	Gbs-70E,Nmda1,Atg1,GlyP,SREBP,Ilp2,GlyS
GO:0006997	nucleus organization	0.184068	-1.69245	19	9	0.0111524	4.73843e+44	sra,ctp,Nap1,Nlp,mamo,Diap1,hyd,Nph,tacc
GO:0045017	glycerolipid biosynthetic process	0.184068	-1.69245	19	9	0.0111524	4.33503e+44	mino,CG7149,CG7990,FASN1,mdy,norpA,ACC,Taz,CG2201
GO:2000177	regulation of neural precursor cell proliferation	0.184068	-1.69245	19	9	0.0111524	4.78774e+44	tws,pros,mts,COX4,UQCR-14,CG7834,CG5214,l(2)gl,COX5A
GO:0043409	negative regulation of MAPK cascade	0.184068	-1.69245	19	9	0.0111524	4.48514e+44	raw,flw,ATPsynD,cpa,ics,Rala,alph,Mkp3,puc
GO:1902692	regulation of neuroblast proliferation	0.184068	-1.69245	19	9	0.0111524	3.25864e+44	UQCR-14,COX4,mts,tws,pros,COX5A,CG7834,CG5214,l(2)gl
GO:0002831	regulation of response to biotic stimulus	0.193234	-1.64385	53	22	0.0272615	3.43803e+111	CYLD,Rala,me31B,Pitslre,Rel,Spn88Ea,Pli,Jra,Rm62,Dredd,Ide,Usp2,Tim10,Pp1alpha-96A,smt3,Prx5,Listericin,GlyP,TM9SF4,Stat92E,cact,GILT1
GO:0006979	response to oxidative stress	0.193234	-1.64385	53	22	0.0272615	3.24064e+111	rut,GLaz,cnc,PHGPx,Idh,Itp-r83A,ATPsynD,ND-SGDH,Sirup,CYLD,chrb,Ho,alph,ple,Eip71CD,Prx5,puc,Pink1,Atg1,sun,Trx-2,Prx3
GO:0022612	gland morphogenesis	0.193429	-1.64285	32	14	0.0173482	3.14054e+71	ctp,Pak,h,drpr,Rac2,l(2)gl,BI-1,Itp-r83A,Pten,Trf2,jeb,raw,Mdh2,btsz
GO:0004672	protein kinase activity	0.193429	-1.64285	32	14	0.0173482	3.40123e+69	ninaC,Dyrk2,Tao,Slob,Pkn,CG31145,bt,Ire1,nmo,CG11486,Atg1,Pink1,Pdk,wit
GO:0007435	salivary gland morphogenesis	0.193429	-1.64285	32	14	0.0173482	4.06644e+71	Itp-r83A,Pten,jeb,Trf2,raw,Mdh2,btsz,ctp,Pak,h,drpr,Rac2,l(2)gl,BI-1
GO:0007162	negative regulation of cell adhesion	0.199202	-1.61344	7	4	0.00495663	4.39913e+21	Pten,par-1,Timp,Lar
GO:0070593	dendrite self-avoidance	0.199202	-1.61344	7	4	0.00495663	4.05533e+20	Cont,bdl,tutl,Bsg
GO:0051654	establishment of mitochondrion localization	0.199202	-1.61344	7	4	0.00495663	3.15814e+19	Marf,Miro,Pink1,milt
GO:0046128	purine ribonucleoside metabolic process	0.199202	-1.61344	7	4	0.00495663	4.48614e+19	sdt,AdenoK,dlg1,awd
GO:1905953	negative regulation of lipid localization	0.199202	-1.61344	7	4	0.00495663	4.48874e+19	mdy,Pten,Itp-r83A,bmm
GO:0034644	cellular response to UV	0.199202	-1.61344	7	4	0.00495663	5.02274e+19	CG17059,Rh4,Rh3,ninaC
GO:0009156	ribonucleoside monophosphate biosynthetic process	0.199202	-1.61344	7	4	0.00495663	4.47504e+19	Ady43A,CG11089,AdenoK,AMPdeam
GO:0042278	purine nucleoside metabolic process	0.199202	-1.61344	7	4	0.00495663	3.94794e+19	AdenoK,sdt,awd,dlg1
GO:0006367	transcription initiation from RNA polymerase II promoter	0.199202	-1.61344	7	4	0.00495663	3.17733e+19	Trf2,caz,RpII15,TfIIA-S
GO:0007455	eye-antennal disc morphogenesis	0.199202	-1.61344	7	4	0.00495663	3.17174e+19	sn,Diap1,Stat92E,hyd
GO:0051052	regulation of DNA metabolic process	0.199202	-1.61344	7	4	0.00495663	3.51734e+19	Acn,Smg6,RpS3,Smg5
GO:0061912	selective autophagy	0.199202	-1.61344	7	4	0.00495663	3.94544e+19	Atg1,Atg12,GlyS,ref(2)P
GO:0030150	protein import into mitochondrial matrix	0.199202	-1.61344	7	4	0.00495663	4.49783e+21	Tom40,CG8206,Tom20,Tim23
GO:0000470	maturation of LSU-rRNA	0.199202	-1.61344	7	4	0.00495663	3.14834e+19	RpL35,RpL10Ab,RpL7A,CG4364
GO:0006835	dicarboxylic acid transport	0.199202	-1.61344	7	4	0.00495663	4.00494e+19	Indy,Dic1,CG8026,aralar1
GO:0035337	fatty-acyl-CoA metabolic process	0.199202	-1.61344	7	4	0.00495663	3.60294e+21	CG1441,wat,CG17691,pdgy
GO:0047497	mitochondrion transport along microtubule	0.199202	-1.61344	7	4	0.00495663	4.28453e+19	Miro,Marf,Pink1,milt
GO:1902652	secondary alcohol metabolic process	0.199202	-1.61344	7	4	0.00495663	3.27894e+19	scu,CG5028,Idh,Marf
GO:0009119	ribonucleoside metabolic process	0.199202	-1.61344	7	4	0.00495663	3.94794e+19	AdenoK,sdt,awd,dlg1
GO:0032465	regulation of cytokinesis	0.199202	-1.61344	7	4	0.00495663	3.59504e+19	Pkn,flw,Bruce,cindr
GO:2000369	regulation of clathrin-dependent endocytosis	0.199202	-1.61344	7	4	0.00495663	3.13764e+19	norpA,BicD,Pkc53E,inaC
GO:0030837	negative regulation of actin filament polymerization	0.199202	-1.61344	7	4	0.00495663	3.85344e+19	Cip4,cpa,tmod,spoon
GO:0034643	establishment of mitochondrion localization, microtubule-mediated	0.199202	-1.61344	7	4	0.00495663	4.28453e+19	Miro,Marf,Pink1,milt
GO:0032272	negative regulation of protein polymerization	0.199202	-1.61344	7	4	0.00495663	3.14594e+19	spoon,cpa,Cip4,tmod
GO:0010888	negative regulation of lipid storage	0.199202	-1.61344	7	4	0.00495663	3.96114e+19	bmm,Itp-r83A,Pten,mdy
GO:0007394	dorsal closure, elongation of leading edge cells	0.199202	-1.61344	7	4	0.00495663	4.11184e+19	FER,raw,scaf,Rac2
GO:0060259	regulation of feeding behavior	0.199202	-1.61344	7	4	0.00495663	4.06643e+19	Itp-r83A,CrebB,Ilp2,5-HT2A
GO:0010977	negative regulation of neuron projection development	0.199202	-1.61344	7	4	0.00495663	4.39913e+19	Pten,Kr-h1,bif,pros
GO:0098534	centriole assembly	0.199202	-1.61344	7	4	0.00495663	4.78775e+23	tws,mts,Pp2A-29B,CG17493
GO:0042559	pteridine-containing compound biosynthetic process	0.199202	-1.61344	7	4	0.00495663	3.17824e+19	CG12116,pr,se,Pu
GO:0007099	centriole replication	0.199202	-1.61344	7	4	0.00495663	4.78773e+23	tws,CG17493,mts,Pp2A-29B
GO:0097190	apoptotic signaling pathway	0.199202	-1.61344	7	4	0.00495663	3.10113e+19	Dredd,ninaA,Ire1,Miro
GO:0009124	nucleoside monophosphate biosynthetic process	0.199202	-1.61344	7	4	0.00495663	3.94794e+19	AdenoK,CG11089,AMPdeam,Ady43A
GO:0072657	protein localization to membrane	0.199535	-1.61177	40	17	0.0210657	4.44484e+87	scrib,app,veli,Bsg,Nrx-1,comt,Sec23,TM9SF4,CG34132,Sec61alpha,stmA,Arf79F,Sec63,Tim10,Srp9,Rab10,dlg1
GO:1902600	proton transmembrane transport	0.199535	-1.61177	40	17	0.0210657	4.22914e+84	ATPsynD,Vha44,ATPsynCF6,Vha36-1,Vha16-1,ATPsynbeta,ATPsyngamma,Vha14-1,ATPsynG,ATPsynB,Vha100-1,Vha68-1,Vha68-2,blw,ATPsyndelta,sun,Ndae1
GO:0048512	circadian behavior	0.199535	-1.61177	40	17	0.0210657	4.49654e+84	Fer2LCH,cry,vri,tim,dlg1,unc80,Ih,unc79,ITP,Clk,Ilp2,cu,Pka-R2,CrebB,CkIIalpha,slmb,qsm
GO:0042462	eye photoreceptor cell development	0.199535	-1.61177	40	17	0.0210657	4.45484e+85	lola,Cpn,jeb,Pten,Moe,Syn2,tau,tutl,bdl,Ten-m,Ire1,boss,chp,Lar,mbl,Amph,grh
GO:0007623	circadian rhythm	0.202414	-1.59744	48	20	0.0247831	3.28175e+99	CrebB,CkIIalpha,rut,Pka-R2,slmb,qsm,Ilp2,Clk,cu,unc79,ITP,Pdp1,to,Fer2LCH,unc80,Ih,cry,vri,dlg1,tim
GO:0016491	oxidoreductase activity	0.206835	-1.57583	22	10	0.0123916	3.34213e+52	CG3609,Cpr,Adi1,CG6084,Adh,CG2767,CG6144,CG9512,FASN1,wal
GO:0050777	negative regulation of immune response	0.206835	-1.57583	22	10	0.0123916	3.49694e+51	cact,Stat92E,GlyP,Jra,Prx5,Pli,Spn88Ea,Tim10,Usp2,Rala
GO:0042749	regulation of circadian sleep/wake cycle	0.206835	-1.57583	22	10	0.0123916	3.39443e+49	homer,CrebB,Ih,Dh31,cry,tim,bgm,Clk,Fbxl4,cue
GO:0007156	homophilic cell adhesion via plasma membrane adhesion molecules	0.211466	-1.55369	17	8	0.00991326	4.60153e+40	tutl,Bsg,bdl,Cont,ed,CG13506,Lac,chp
GO:0010883	regulation of lipid storage	0.211466	-1.55369	17	8	0.00991326	4.06644e+39	Itp-r83A,Pten,Arf79F,mdy,Indy,Rac2,CG5946,bmm
GO:0034599	cellular response to oxidative stress	0.211466	-1.55369	17	8	0.00991326	3.96754e+41	Eip71CD,puc,GLaz,Prx5,Atg1,Prx3,Idh,Sirup
GO:0043065	positive regulation of apoptotic process	0.211466	-1.55369	17	8	0.00991326	4.25504e+39	E2f1,Mdh2,Dredd,Pten,Den1,Atg1,RpS3,TER94
GO:0010959	regulation of metal ion transport	0.211466	-1.55369	17	8	0.00991326	3.31324e+39	Usp2,Cnx99A,CG4928,olf186-F,homer,NKAIN,Sec61alpha,Nedd4
GO:0016485	protein processing	0.211466	-1.55369	17	8	0.00991326	4.08154e+39	twr,UQCR-C2,Nep3,UQCR-C1,Fur2,Dredd,CG4678,tok
GO:1901606	alpha-amino acid catabolic process	0.211466	-1.55369	17	8	0.00991326	4.04344e+39	P5CDh1,Gdh,CG7430,TER94,CG15093,CG17896,Gad1,CG5955
GO:0071453	cellular response to oxygen levels	0.211758	-1.55231	12	6	0.00743494	4.06334e+29	Hph,trp,Vha68-1,trpl,Eip93F,Tom40
GO:0008406	gonad development	0.211758	-1.55231	12	6	0.00743494	3.68974e+29	inaC,ct,hyd,raw,Invadolysin,lola
GO:1903432	regulation of TORC1 signaling	0.211758	-1.55231	12	6	0.00743494	4.39914e+30	Pten,CG14184,RagC-D,AMPKalpha,E2f1,Rheb
GO:0050821	protein stabilization	0.211758	-1.55231	12	6	0.00743494	3.67505e+29	Mlf,tws,DnaJ-1,Cnx99A,CG8206,Snx3
GO:0045137	development of primary sexual characteristics	0.211758	-1.55231	12	6	0.00743494	4.48514e+29	raw,inaC,ct,hyd,lola,Invadolysin
GO:0051093	negative regulation of developmental process	0.217442	-1.52582	78	31	0.0384139	4.39914e+154	Pten,Cip4,pros,tws,Ptpmeg,Tao,ed,dlg1,alph,CG7834,CG5214,Csk,Stat92E,cact,Diap1,Pink1,bif,Ilp2,Kr-h1,lqf,COX4,mts,UQCR-14,Bruce,norpA,chn,l(2)gl,slmb,Mob4,COX5A,scrib
GO:0016054	organic acid catabolic process	0.21771	-1.52459	30	13	0.016109	3.35507e+66	CG17691,CG15093,CG7430,wal,TER94,CG17896,Gad1,CG5955,Hydr2,CG14688,Arc42,P5CDh1,Gdh
GO:0001933	negative regulation of protein phosphorylation	0.21771	-1.52459	30	13	0.016109	4.39914e+64	Pten,cpa,ATPsynD,flw,raw,mts,Rala,ics,chinmo,alph,l(2)gl,puc,Mkp3
GO:0097659	nucleic acid-templated transcription	0.21771	-1.52459	30	13	0.016109	4.29423e+64	Rpb10,Trf2,spen,RpII15,spt4,Nipped-A,Rpb8,TfIIA-S,vri,caz,Nurf-38,Rpb5,Xbp1
GO:0006351	transcription, DNA-templated	0.21771	-1.52459	30	13	0.016109	3.17734e+64	Trf2,Rpb10,spen,spt4,RpII15,Nipped-A,Rpb8,TfIIA-S,vri,caz,Nurf-38,Rpb5,Xbp1
GO:0046395	carboxylic acid catabolic process	0.21771	-1.52459	30	13	0.016109	3.99884e+66	CG7430,wal,TER94,CG17691,CG15093,Hydr2,CG17896,CG5955,Gad1,P5CDh1,Arc42,Gdh,CG14688
GO:0042326	negative regulation of phosphorylation	0.21771	-1.52459	30	13	0.016109	4.34813e+64	alph,l(2)gl,puc,Mkp3,Pten,cpa,ATPsynD,flw,raw,mts,Rala,ics,chinmo
GO:0048585	negative regulation of response to stimulus	0.227128	-1.48224	144	55	0.0681537	35576,42504,42821,41062,42291,45959,34774,31332,33386,34778,34969,42733,35505,37961,40958,3771951,40081,2768852,40459,39958,37387,43991,42922,38174,44851,38059,38993,36057,36040,33156,34718,117332,35078,49804,38890,36578,40148,43729,39284,43904,43481,3355013,41450,36905,42428,38936,2768940,39454,44289,33132,33262,37478,33619,34592,40248	Mob4,slmb,Pli,pyd,ATPsynD,mts,ics,Rala,GlyP,TM9SF4,cact,Cow,scaf,Eps-15,puc,Prx5,Mkp3,par-1,Csp,Nedd4,cpa,Pten,Pp1alpha-96A,cue,raw,Ptpmeg,Arr2,Jra,TER94,l(2)gl,kek4,Rheb,Arr1,Spn88Ea,nmo,Opa1,Gbeta76C,kek6,chrb,AMPKalpha,alph,Gprk1,Tango9,Cbp53E,Stat92E,BI-1,Pp2A-29B,Atg1,flw,Usp2,dock,Tim10,ed,crol,Ide
GO:0046660	female sex differentiation	0.234664	-1.4496	5	3	0.00371747	445403689741181	ct,inaC,hyd
GO:0033301	cell cycle comprising mitosis without cytokinesis	0.234664	-1.4496	5	3	0.00371747	535673741533981	larp,Pu,smt3
GO:0007279	pole cell formation	0.234664	-1.4496	5	3	0.00371747	360404058934364	TER94,tacc,me31B
GO:0006662	glycerol ether metabolic process	0.234664	-1.4496	5	3	0.00371747	342814349244736	Trx-2,CG7582,CG3719
GO:0006879	cellular iron ion homeostasis	0.234664	-1.4496	5	3	0.00371747	347454496546415	CG6523,Fer2LCH,Fer1HCH
GO:1901068	guanosine-containing compound metabolic process	0.234664	-1.4496	5	3	0.00371747	448613208343739	sdt,dlg1,awd
GO:0015740	C4-dicarboxylate transport	0.234664	-1.4496	5	3	0.00371747	436164164040049	aralar1,Dic1,Indy
GO:0051283	negative regulation of sequestering of calcium ion	0.234664	-1.4496	5	3	0.00371747	406644354231376	Itp-r83A,trp,norpA
GO:0046503	glycerolipid catabolic process	0.234664	-1.4496	5	3	0.00371747	324263961133532	pdgy,bmm,Hydr2
GO:0030539	male genitalia development	0.234664	-1.4496	5	3	0.00371747	334184095835505	Rab5,puc,scaf
GO:0016332	establishment or maintenance of polarity of embryonic epithelium	0.234664	-1.4496	5	3	0.00371747	448613315644448	sdt,l(2)gl,scrib
GO:0009589	detection of UV	0.234664	-1.4496	5	3	0.00371747	398873401242398	Rh4,ninaC,Rh3
GO:0046533	negative regulation of photoreceptor cell differentiation	0.234664	-1.4496	5	3	0.00371747	434813386133619	alph,Kr-h1,ed
GO:0007638	mechanosensory behavior	0.234664	-1.4496	5	3	0.00371747	460153122837800	tutl,tko,kcc
GO:0110118	negative regulation of compound eye photoreceptor cell differentiation	0.234664	-1.4496	5	3	0.00371747	434813386133619	alph,Kr-h1,ed
GO:0035384	thioester biosynthetic process	0.234664	-1.4496	5	3	0.00371747	3.24264e+16	pdgy,ATPCL,CG17691
GO:0043281	regulation of cysteine-type endopeptidase activity involved in apoptotic process	0.234664	-1.4496	5	3	0.00371747	421853101139753	Mdh2,Dredd,Diap1
GO:0030497	fatty acid elongation	0.234664	-1.4496	5	3	0.00371747	3261483986042650	CG31523,Baldspot,CG5326
GO:1902476	chloride transmembrane transport	0.234664	-1.4496	5	3	0.00371747	414283400536381	ClC-a,Ndae1,ClC-b
GO:0051896	regulation of protein kinase B signaling	0.234664	-1.4496	5	3	0.00371747	439914595938017	Pten,mts,Pdk1
GO:0035112	genitalia morphogenesis	0.234664	-1.4496	5	3	0.00371747	355053341840958	scaf,Rab5,puc
GO:0043113	receptor clustering	0.234664	-1.4496	5	3	0.00371747	426464444832083	Nrx-1,scrib,dlg1
GO:0035126	post-embryonic genitalia morphogenesis	0.234664	-1.4496	5	3	0.00371747	334184095835505	Rab5,puc,scaf
GO:0007439	ectodermal digestive tract development	0.234664	-1.4496	5	3	0.00371747	448513625240958	raw,wal,puc
GO:0048803	imaginal disc-derived male genitalia morphogenesis	0.234664	-1.4496	5	3	0.00371747	355053341840958	scaf,Rab5,puc
GO:0048805	imaginal disc-derived genitalia morphogenesis	0.234664	-1.4496	5	3	0.00371747	355054095833418	scaf,puc,Rab5
GO:0090598	male anatomical structure morphogenesis	0.234664	-1.4496	5	3	0.00371747	334184095835505	Rab5,puc,scaf
GO:0046146	tetrahydrobiopterin metabolic process	0.234664	-1.4496	5	3	0.00371747	374153178235292	Pu,CG12116,pr
GO:0018904	ether metabolic process	0.234664	-1.4496	5	3	0.00371747	447364349234281	CG3719,CG7582,Trx-2
GO:0051282	regulation of sequestering of calcium ion	0.234664	-1.4496	5	3	0.00371747	435424066431376	trp,Itp-r83A,norpA
GO:0006399	tRNA metabolic process	0.234664	-1.4496	5	3	0.00371747	3.27894e+17	scu,Rpp20,CG30343
GO:0016060	metarhodopsin inactivation	0.234664	-1.4496	5	3	0.00371747	3.35501e+16	Gprk1,Arr1,Arr2
GO:0006729	tetrahydrobiopterin biosynthetic process	0.234664	-1.4496	5	3	0.00371747	374153529231782	Pu,pr,CG12116
GO:0007483	genital disc morphogenesis	0.234664	-1.4496	5	3	0.00371747	334184095835505	Rab5,puc,scaf
GO:0098586	cellular response to virus	0.234664	-1.4496	5	3	0.00371747	360404309133905	TER94,Npl4,Sec61alpha
GO:0009996	negative regulation of cell fate specification	0.234664	-1.4496	5	3	0.00371747	388463361936678	lqf,ed,chn
GO:0022408	negative regulation of cell-cell adhesion	0.234664	-1.4496	5	3	0.00371747	2.76885e+16	par-1,Timp,Lar
GO:0034311	diol metabolic process	0.234664	-1.4496	5	3	0.00371747	374153178235292	Pu,CG12116,pr
GO:2000242	negative regulation of reproductive process	0.234664	-1.4496	5	3	0.00371747	412603805942504	Bruce,Ptpmeg,slmb
GO:0010822	positive regulation of mitochondrion organization	0.234664	-1.4496	5	3	0.00371747	365783158131607	Opa1,Marf,Pink1
GO:0048808	male genitalia morphogenesis	0.234664	-1.4496	5	3	0.00371747	355053341840958	scaf,Rab5,puc
GO:0051187	cofactor catabolic process	0.234664	-1.4496	5	3	0.00371747	4.14074e+16	Ho,Prx3,Prx5
GO:0071616	acyl-CoA biosynthetic process	0.234664	-1.4496	5	3	0.00371747	3.24264e+16	pdgy,ATPCL,CG17691
GO:0034312	diol biosynthetic process	0.234664	-1.4496	5	3	0.00371747	317823529237415	CG12116,pr,Pu
GO:0042168	heme metabolic process	0.234664	-1.4496	5	3	0.00371747	461403439441407	l(3)02640,CG5037,Ho
GO:0008585	female gonad development	0.234664	-1.4496	5	3	0.00371747	411813689744540	hyd,inaC,ct
GO:0007414	axonal defasciculation	0.234664	-1.4496	5	3	0.00371747	460153274342944	tutl,RhoGAPp190,tok
GO:0051663	oocyte nucleus localization involved in oocyte dorsal/ventral axis specification	0.234664	-1.4496	5	3	0.00371747	350514428942743	BicD,flw,cnc
GO:0071897	DNA biosynthetic process	0.234664	-1.4496	5	3	0.00371747	429944255034804	Smg6,E2f1,Smg5
GO:0040013	negative regulation of locomotion	0.234664	-1.4496	5	3	0.00371747	439913785038059	Pten,Rap2l,Ptpmeg
GO:0046545	development of primary female sexual characteristics	0.234664	-1.4496	5	3	0.00371747	411813689744540	hyd,inaC,ct
GO:0048567	ectodermal digestive tract morphogenesis	0.234664	-1.4496	5	3	0.00371747	448513625240958	raw,wal,puc
GO:0006778	porphyrin-containing compound metabolic process	0.234664	-1.4496	5	3	0.00371747	343944614041407	CG5037,l(3)02640,Ho
GO:0048511	rhythmic process	0.235423	-1.44637	49	20	0.0247831	3.37594e+99	vri,cry,dlg1,tim,unc80,Ih,Fer2LCH,to,Pdp1,unc79,ITP,Ilp2,Clk,cu,slmb,qsm,rut,Pka-R2,CrebB,CkIIalpha
GO:0051604	protein maturation	0.236164	-1.44323	20	9	0.0111524	3.30053e+44	Nep3,Fur2,UQCR-C1,UQCR-C2,twr,san,tok,CG4678,Dredd
GO:0042273	ribosomal large subunit biogenesis	0.236164	-1.44323	20	9	0.0111524	3.15885e+44	RpL7A,RpL12,RpL35,RpL24-like,RpL26,RpL6,RpL10Ab,CG4364,RpL3
GO:0090150	establishment of protein localization to membrane	0.236164	-1.44323	20	9	0.0111524	3.93993e+46	app,Sec61alpha,scrib,CG34132,comt,Srp9,Sec63,Tim10,Arf79F
GO:0010648	negative regulation of cell communication	0.237258	-1.43861	139	53	0.0656753	35078,117332,49804,38890,34718,33156,36040,35359,43904,43729,39284,40148,36578,39454,38936,2768940,3355013,43481,41450,33619,34592,40248,33262,36295,33132,44289,42821,35576,42504,45959,42561,31332,34774,32378,42291,41062,37961,40081,40958,2768852,39958,34969,42733,35505,34778,38059,38993,38863,38174,42922,44851,37387,43991	Arr1,Rheb,Spn88Ea,nmo,kek4,l(2)gl,TER94,sky,AMPKalpha,kek6,chrb,Gbeta76C,Opa1,Atg1,BI-1,Pp2A-29B,Gprk1,alph,Tango9,ed,crol,Ide,dock,jeb,Usp2,flw,Pli,Mob4,slmb,mts,GABA-B-R2,Rala,ics,Fbxl4,ATPsynD,pyd,Eps-15,Mkp3,puc,par-1,Nedd4,cact,Cow,scaf,TM9SF4,Ptpmeg,Arr2,Ank2,cue,Pp1alpha-96A,raw,cpa,Pten
GO:0007631	feeding behavior	0.24401	-1.41055	15	7	0.0086741	4.30363e+34	to,rut,SLC5A11,Rac2,Ilp2,RanBPM,Itp-r83A
GO:0008654	phospholipid biosynthetic process	0.24401	-1.41055	15	7	0.0086741	4.33503e+34	mino,norpA,CG7149,CG7990,Inos,CG2201,Taz
GO:0006974	cellular response to DNA damage stimulus	0.245219	-1.40561	28	12	0.0148699	4.05964e+59	ctrip,RpS3,CG1814,Uev1A,koi,Nipped-A,hyd,RpII15,Rel,14-3-3epsilon,tim,Xrp1
GO:0007314	oocyte anterior/posterior axis specification	0.245219	-1.40561	28	12	0.0148699	4.25044e+61	slmb,glo,cnc,par-1,scrib,spir,l(2)gl,bic,dlg1,Moe,Tm1,gus
GO:1901615	organic hydroxy compound metabolic process	0.246178	-1.4017	52	21	0.0260223	4.17013e+106	Ipp,l(1)G0196,CG6910,CG7675,CG5028,scu,Idh,Inos,norpA,t,Rac2,Pdh,ple,Marf,CG12116,Pu,Adh,Pten,Npc1a,Tpi,pr
GO:1901879	regulation of protein depolymerization	0.247671	-1.39565	10	5	0.00619579	4.05894e+26	tacc,tmod,cpa,futsch,mlt
GO:0051090	regulation of DNA-binding transcription factor activity	0.247671	-1.39565	10	5	0.00619579	3.39814e+24	smt3,TfIIA-S,14-3-3epsilon,cact,pros
GO:0008202	steroid metabolic process	0.247671	-1.39565	10	5	0.00619579	3.15814e+24	Marf,GstE14,CG9512,Npc1a,scu
GO:0001708	cell fate specification	0.247671	-1.39565	10	5	0.00619579	3.20834e+24	dlg1,scrib,pyd,pros,jeb
GO:0015718	monocarboxylic acid transport	0.247671	-1.39565	10	5	0.00619579	4.26462e+25	Nrx-1,CG30503,Pmp70,Indy,CG3009
GO:0034285	response to disaccharide	0.247671	-1.39565	10	5	0.00619579	3.60604e+24	Pfk,PyK,ACC,FASN1,GlyS
GO:0046662	regulation of oviposition	0.247671	-1.39565	10	5	0.00619579	3.62364e+24	Drip,Ide,p24-1,CHOp24,Est-6
GO:0098656	anion transmembrane transport	0.248112	-1.39388	36	15	0.0185874	4.14284e+76	ClC-a,ClC-b,porin,sea,Dic1,CG8026,CG43693,Pmp70,Ndae1,CG1628,CG1607,aralar1,MRP,Indy,kcc
GO:0022604	regulation of cell morphogenesis	0.252601	-1.37594	63	25	0.0309789	3.21194e+125	bif,pyd,Rala,me31B,AMPKalpha,Pak,l(2)gl,Rheb,Lar,Pten,FER,Moe,pros,sif,raw,ed,NetB,babos,RhoGEF2,Sec23,scaf,Rac2,tutl,RhoGAPp190,Nedd4
GO:0007163	establishment or maintenance of cell polarity	0.253248	-1.37339	93	36	0.0446097	4.13984e+181	Csk,Sec23,csw,dlg1,ed,alpha-Cat,alc,spoon,Ran,Klp64D,Moe,scrib,veli,nmo,BicD,grh,l(2)gl,Jra,AMPKalpha,awd,sn,Rab5,par-1,ctp,AnxB9,parvin,scaf,lola,tws,cnc,slmb,14-3-3epsilon,mts,Rala,Cont,sdt
GO:0072091	regulation of stem cell proliferation	0.257578	-1.35643	23	10	0.0123916	3.31564e+49	l(2)gl,CG5214,CG7834,COX5A,Rel,pros,tws,COX4,mts,UQCR-14
GO:0042052	rhabdomere development	0.257578	-1.35643	23	10	0.0123916	3.63834e+50	Amph,grh,Syn2,tau,mbl,Ire1,Cpn,chp,Pten,Moe
GO:0035222	wing disc pattern formation	0.257578	-1.35643	23	10	0.0123916	3.88904e+49	nmo,CG1943,gammaSnap1,Cow,drpr,AnxB9,mts,14-3-3epsilon,Nipped-A,spen
GO:0023057	negative regulation of signaling	0.258011	-1.35475	140	53	0.0656753	49804,38890,35078,117332,36040,33156,34718,43729,39284,35359,43904,36578,40148,38936,2768940,39454,43481,3355013,41450,33619,34592,40248,44289,33132,36295,33262,42504,35576,42821,45959,42561,31332,34774,41062,42291,32378,2768852,37961,40958,40081,39958,34778,34969,42733,35505,38993,38059,37387,43991,42922,38863,38174,44851	Spn88Ea,nmo,Arr1,Rheb,TER94,l(2)gl,kek4,kek6,chrb,sky,AMPKalpha,Opa1,Gbeta76C,BI-1,Pp2A-29B,Atg1,alph,Gprk1,Tango9,ed,crol,Ide,flw,Usp2,jeb,dock,slmb,Mob4,Pli,mts,GABA-B-R2,Rala,ics,pyd,ATPsynD,Fbxl4,par-1,Eps-15,puc,Mkp3,Nedd4,TM9SF4,cact,Cow,scaf,Arr2,Ptpmeg,cpa,Pten,Pp1alpha-96A,Ank2,cue,raw
GO:0015711	organic anion transport	0.259585	-1.34867	47	19	0.023544	4.26464e+98	Nrx-1,slmo,CG43693,CG30392,Dic1,CG1628,CG6299,CG30503,Pmp70,CG8177,sea,CG8026,Ndae1,kcc,CG3009,Indy,rdgB,aralar1,CG1607
GO:0031347	regulation of defense response	0.259585	-1.34867	47	19	0.023544	3.13323e+96	Rala,CYLD,me31B,Rel,Spn88Ea,Pli,Rm62,Dredd,Ide,Usp2,Pp1alpha-96A,Tim10,Prx5,TM9SF4,Listericin,GlyP,GILT1,cact,Stat92E
GO:0015849	organic acid transport	0.26164	-1.34078	31	13	0.016109	3.29922e+67	Pmp70,CG30503,CG1628,aralar1,CG1607,kcc,Indy,CG3009,Nrx-1,CG8026,Dic1,sea,CG43693
GO:0008589	regulation of smoothened signaling pathway	0.26164	-1.34078	31	13	0.016109	3.17134e+68	Ubr3,Nedd4,slmb,Pp2A-29B,Gprk1,CkIIalpha,Usp8,Nedd8,mts,Pp1alpha-96A,tws,Gbeta76C,flw
GO:0046942	carboxylic acid transport	0.26164	-1.34078	31	13	0.016109	4.26464e+67	Nrx-1,CG43693,sea,Dic1,CG8026,CG30503,CG1628,Pmp70,kcc,Indy,CG3009,CG1607,aralar1
GO:0032774	RNA biosynthetic process	0.26164	-1.34078	31	13	0.016109	3.79223e+64	Nurf-38,caz,Xbp1,Rpb5,spt4,RpII15,Nipped-A,Rpb10,Trf2,spen,Rpb8,TfIIA-S,vri
GO:0007444	imaginal disc development	0.270036	-1.3092	185	69	0.0855019	2768852,39753,31405,42492,38218,35505,42509,44548,37823,37449,36648,42186,45959,36571,35478,37929,36915,42428,38746,43481,45278,32083,41551,33759,34592,38534,31816,44448,36057,31717,41921,40081,40958,40844,39958,42733,32990,42550,47877,35215,37387,45012,39399,44039,34774,34979,42944,35950,35483,41062,31382,37842,33619,49580,44289,41737,44540,41248,36513,49804,39733,38890,43862,33156,42854,33343,3…	par-1,Diap1,ctp,AnxB9,drpr,scaf,Usp8,lola,Phm,Fkbp14,hui,14-3-3epsilon,mts,cg,gus,pio,RhoGEF2,Stat92E,ple,alph,csw,dlg1,Snx3,vri,crol,Cip4,Moe,scrib,Jra,sn,cv-d,Mkp3,puc,CG1943,Nedd4,Cow,parvin,E2f1,tws,Pax,cpa,Vha68-2,app,Pak,ics,Idgf2,tok,Pkn,Nipped-A,pyd,CHOp24,gammaSnap1,ed,Invadolysin,flw,trx,ct,Timp,CG6191,Spn88Ea,Pka-C3,nmo,HnRNP-K,l(2)gl,Syx1A,chinmo,Rab5,spen,hyd
GO:0044264	cellular polysaccharide metabolic process	0.270435	-1.30772	18	8	0.00991326	3.93833e+39	Atg12,CG7766,ACC,Atg1,beta-Man,GlyP,GlyS,FASN1
GO:0048520	positive regulation of behavior	0.270435	-1.30772	18	8	0.00991326	3.81744e+39	cue,Ih,Dh31,bgm,homer,CrebB,5-HT2A,Pink1
GO:0005976	polysaccharide metabolic process	0.270435	-1.30772	18	8	0.00991326	3.93833e+39	Atg12,CG7766,ACC,Atg1,beta-Man,GlyP,GlyS,FASN1
GO:0072659	protein localization to plasma membrane	0.270435	-1.30772	18	8	0.00991326	4.05064e+40	Arf79F,stmA,Rab10,Sec23,comt,TM9SF4,scrib,Bsg
GO:1902532	negative regulation of intracellular signal transduction	0.270546	-1.30731	50	20	0.0247831	4.09584e+104	puc,Mkp3,par-1,Atg1,Pp2A-29B,alph,Ide,raw,flw,Pten,cpa,slmb,Mob4,Rheb,AMPKalpha,Rala,ics,mts,ATPsynD,Opa1
GO:0000278	mitotic cell cycle	0.272653	-1.29956	102	39	0.0483271	3.54834e+197	Nipped-A,Pkn,CG3530,mts,Act87E,tacc,14-3-3epsilon,CkIIalpha,alphaTub84D,Mob4,B52,Synd,RpS3,Map205,san,tws,E2f1,CG17493,larp,ctp,RpII15,Rpn10,awd,COX4,Rab5,Syx1A,AMPKalpha,l(2)gl,Rheb,Arf79F,stmA,Pu,Invadolysin,Ran,csw,dlg1,alph,betaTub97EF,smt3
GO:0009968	negative regulation of signal transduction	0.276289	-1.28631	127	48	0.0594796	42504,35576,42821,31332,34774,45959,42291,41062,39958,40081,2768852,40958,37961,34778,35505,42733,34969,38993,38059,43991,37387,44851,38174,42922,49804,38890,35078,117332,36040,33156,34718,39284,43729,43904,36578,40148,2768940,38936,39454,41450,43481,3355013,40248,34592,33619,44289,33132,33262	slmb,Mob4,Pli,Rala,ics,mts,ATPsynD,pyd,Nedd4,Mkp3,par-1,puc,Eps-15,TM9SF4,scaf,Cow,cact,Arr2,Ptpmeg,Pten,cpa,raw,cue,Pp1alpha-96A,Spn88Ea,nmo,Arr1,Rheb,TER94,l(2)gl,kek4,chrb,kek6,AMPKalpha,Opa1,Gbeta76C,Pp2A-29B,BI-1,Atg1,Tango9,alph,Gprk1,Ide,crol,ed,flw,Usp2,dock
GO:0006732	coenzyme metabolic process	0.27642	-1.28583	26	11	0.0136307	3.84114e+56	CG12016,pr,CG1441,pdgy,Pu,scu,CG12116,CG7920,wat,ATPCL,CG17691
GO:0008360	regulation of cell shape	0.27642	-1.28583	26	11	0.0136307	3.36194e+54	ed,raw,Pten,FER,pyd,Moe,RhoGEF2,Sec23,l(2)gl,scaf,Rac2
GO:0000381	regulation of alternative mRNA splicing, via spliceosome	0.27642	-1.28583	26	11	0.0136307	4.29584e+56	Saf-B,Dbp45A,Rm62,CG17454,Hrb98DE,Rox8,snf,mbl,HnRNP-K,Caper,B52
GO:0043484	regulation of RNA splicing	0.276611	-1.28514	34	14	0.0173482	4.23584e+71	Ire1,Saf-B,Dbp45A,Rm62,qkr58E-2,CG17454,Hrb98DE,Rox8,BI-1,Caper,mbl,HnRNP-K,snf,B52
GO:0034976	response to endoplasmic reticulum stress	0.276611	-1.28514	34	14	0.0173482	4.41174e+69	bgm,Calr,Cnx99A,CG11842,CG3061,Ire1,Calx,PHGPx,cnc,CG9005,Xbp1,ninaA,Marf,godzilla
GO:0016358	dendrite development	0.280923	-1.26968	53	21	0.0260223	4.45484e+106	lola,pros,Pten,CG6701,ct,Actbeta,robl,smt3,wit,NetB,chn,AMPKalpha,sn,Mical,Rab5,futsch,Tm1,Rel,cnc,jim,TER94
GO:2000737	negative regulation of stem cell differentiation	0.281395	-1.268	3	2	0.00247831	4242838846	Stat92E,lqf
GO:0001523	retinoid metabolic process	0.281395	-1.268	3	2	0.00247831	4221139812	CG7675,Pdh
GO:0006084	acetyl-CoA metabolic process	0.281395	-1.268	3	2	0.00247831	4356236760	CG7920,ATPCL
GO:0043433	negative regulation of DNA-binding transcription factor activity	0.281395	-1.268	3	2	0.00247831	3496942186	cact,14-3-3epsilon
GO:0042177	negative regulation of protein catabolic process	0.281395	-1.268	3	2	0.00247831	4844841248	CkIIalpha,Timp
GO:0032922	circadian regulation of gene expression	0.281395	-1.268	3	2	0.00247831	4230538872	cry,Clk
GO:1901571	fatty acid derivative transport	0.281395	-1.268	3	2	0.00247831	24665631402	CG30503,CG3009
GO:0006368	transcription elongation from RNA polymerase II promoter	0.281395	-1.268	3	2	0.00247831	3638741741	spt4,RpII15
GO:0006354	DNA-templated transcription, elongation	0.281395	-1.268	3	2	0.00247831	3638741741	spt4,RpII15
GO:0048524	positive regulation of viral process	0.281395	-1.268	3	2	0.00247831	3604033905	TER94,Sec61alpha
GO:0002385	mucosal immune response	0.281395	-1.268	3	2	0.00247831	3137640081	norpA,Mkp3
GO:0019674	NAD metabolic process	0.281395	-1.268	3	2	0.00247831	4283236060	Gdh,Pfk
GO:0006730	one-carbon metabolic process	0.281395	-1.268	3	2	0.00247831	3478639390	CAH1,CAH2
GO:0042416	dopamine biosynthetic process	0.281395	-1.268	3	2	0.00247831	3186338746	t,ple
GO:0046189	phenol-containing compound biosynthetic process	0.281395	-1.268	3	2	0.00247831	3874631863	ple,t
GO:0006734	NADH metabolic process	0.281395	-1.268	3	2	0.00247831	3606042832	Pfk,Gdh
GO:0006828	manganese ion transport	0.281395	-1.268	3	2	0.00247831	4354236003	trp,trpl
GO:0010738	regulation of protein kinase A signaling	0.281395	-1.268	3	2	0.00247831	3240631459	rut,spoon
GO:0050908	detection of light stimulus involved in visual perception	0.281395	-1.268	3	2	0.00247831	3600343542	trpl,trp
GO:0048087	positive regulation of developmental pigmentation	0.281395	-1.268	3	2	0.00247831	4069431607	Sec23,Pink1
GO:0014065	phosphatidylinositol 3-kinase signaling	0.281395	-1.268	3	2	0.00247831	3801743991	Pdk1,Pten
GO:0043393	regulation of protein binding	0.281395	-1.268	3	2	0.00247831	3899335078	Arr2,Arr1
GO:0002433	immune response-regulating cell surface receptor signaling pathway involved in phagocytosis	0.281395	-1.268	3	2	0.00247831	3883133219	Rac2,crq
GO:1904886	beta-catenin destruction complex disassembly	0.281395	-1.268	3	2	0.00247831	4292244289	Pp1alpha-96A,flw
GO:0046717	acid secretion	0.281395	-1.268	3	2	0.00247831	31402246656	CG3009,CG30503
GO:0007402	ganglion mother cell fate determination	0.281395	-1.268	3	2	0.00247831	4136337038	pros,grh
GO:0051693	actin filament capping	0.281395	-1.268	3	2	0.00247831	3738743633	cpa,tmod
GO:0034389	lipid droplet organization	0.281395	-1.268	3	2	0.00247831	3158144360	Marf,Rab18
GO:0002768	immune response-regulating cell surface receptor signaling pathway	0.281395	-1.268	3	2	0.00247831	3883133219	Rac2,crq
GO:0006538	glutamate catabolic process	0.281395	-1.268	3	2	0.00247831	3848442832	Gad1,Gdh
GO:1902914	regulation of protein polyubiquitination	0.281395	-1.268	3	2	0.00247831	4118140596	hyd,ctrip
GO:0030240	skeletal muscle thin filament assembly	0.281395	-1.268	3	2	0.00247831	3231441225	up,Mical
GO:0051204	protein insertion into mitochondrial membrane	0.281395	-1.268	3	2	0.00247831	374784379884	Tim10,CG34132
GO:0030834	regulation of actin filament depolymerization	0.281395	-1.268	3	2	0.00247831	3738743633	cpa,tmod
GO:0050848	regulation of calcium-mediated signaling	0.281395	-1.268	3	2	0.00247831	3704047384	olf186-F,sra
GO:0007023	post-chaperonin tubulin folding pathway	0.281395	-1.268	3	2	0.00247831	3553236072	Tbce,mlt
GO:0043280	positive regulation of cysteine-type endopeptidase activity involved in apoptotic process	0.281395	-1.268	3	2	0.00247831	3101142185	Dredd,Mdh2
GO:0002785	negative regulation of antimicrobial peptide production	0.281395	-1.268	3	2	0.00247831	3496933132	cact,Usp2
GO:0022401	negative adaptation of signaling pathway	0.281395	-1.268	3	2	0.00247831	3507838993	Arr1,Arr2
GO:0048521	negative regulation of behavior	0.281395	-1.268	3	2	0.00247831	3237839150	Fbxl4,Ilp2
GO:0051289	protein homotetramerization	0.281395	-1.268	3	2	0.00247831	3606038325	Pfk,CG16986
GO:0051881	regulation of mitochondrial membrane potential	0.281395	-1.268	3	2	0.00247831	3658342291	Hsc70-5,ATPsynD
GO:0042423	catecholamine biosynthetic process	0.281395	-1.268	3	2	0.00247831	3874631863	ple,t
GO:0060250	germ-line stem-cell niche homeostasis	0.281395	-1.268	3	2	0.00247831	3610239150	RanBPM,Ilp2
GO:0048388	endosomal lumen acidification	0.281395	-1.268	3	2	0.00247831	4501243442	Vha68-2,Vha100-1
GO:0046337	phosphatidylethanolamine metabolic process	0.281395	-1.268	3	2	0.00247831	3541734063	CG2201,CG7149
GO:0046956	positive phototaxis	0.281395	-1.268	3	2	0.00247831	3208343493	dlg1,Gycalpha99B
GO:0002029	desensitization of G protein-coupled receptor signaling pathway	0.281395	-1.268	3	2	0.00247831	3899335078	Arr2,Arr1
GO:0009068	aspartate family amino acid catabolic process	0.281395	-1.268	3	2	0.00247831	3604040268	TER94,CG5955
GO:0046040	IMP metabolic process	0.281395	-1.268	3	2	0.00247831	4297332352	CG11089,AMPdeam
GO:0070059	intrinsic apoptotic signaling pathway in response to endoplasmic reticulum stress	0.281395	-1.268	3	2	0.00247831	4235833271	Ire1,ninaA
GO:0046902	regulation of mitochondrial membrane permeability	0.281395	-1.268	3	2	0.00247831	4284541450	Miro,Tango9
GO:0016101	diterpenoid metabolic process	0.281395	-1.268	3	2	0.00247831	4221139812	CG7675,Pdh
GO:0046949	fatty-acyl-CoA biosynthetic process	0.281395	-1.268	3	2	0.00247831	335506932426	CG17691,pdgy
GO:1902099	regulation of metaphase/anaphase transition of cell cycle	0.281395	-1.268	3	2	0.00247831	4958047877	Invadolysin,tws
GO:0030835	negative regulation of actin filament depolymerization	0.281395	-1.268	3	2	0.00247831	3738743633	cpa,tmod
GO:0007377	germ-band extension	0.281395	-1.268	3	2	0.00247831	3691540575	RhoGEF2,5-HT2A
GO:0002031	G protein-coupled receptor internalization	0.281395	-1.268	3	2	0.00247831	3507838993	Arr1,Arr2
GO:0007021	tubulin complex assembly	0.281395	-1.268	3	2	0.00247831	3607235532	mlt,Tbce
GO:0060269	centripetally migrating follicle cell migration	0.281395	-1.268	3	2	0.00247831	3145935259	spoon,Lar
GO:0007311	maternal specification of dorsal/ventral axis, oocyte, germ-line encoded	0.281395	-1.268	3	2	0.00247831	3604641431	sel,glo
GO:0043486	histone exchange	0.281395	-1.268	3	2	0.00247831	4863235483	Act87E,Nipped-A
GO:0030104	water homeostasis	0.281395	-1.268	3	2	0.00247831	4142836236	ClC-a,Drip
GO:0008205	ecdysone metabolic process	0.281395	-1.268	3	2	0.00247831	3158132789	Marf,scu
GO:1903963	arachidonate transport	0.281395	-1.268	3	2	0.00247831	31402246656	CG3009,CG30503
GO:0018126	protein hydroxylation	0.281395	-1.268	3	2	0.00247831	4063336778	Hph,Asph
GO:0001775	cell activation	0.281395	-1.268	3	2	0.00247831	3321947384	crq,sra
GO:0006919	activation of cysteine-type endopeptidase activity involved in apoptotic process	0.281395	-1.268	3	2	0.00247831	3101142185	Dredd,Mdh2
GO:0052128	positive energy taxis	0.281395	-1.268	3	2	0.00247831	3208343493	dlg1,Gycalpha99B
GO:0051220	cytoplasmic sequestering of protein	0.281395	-1.268	3	2	0.00247831	3496942186	cact,14-3-3epsilon
GO:2001056	positive regulation of cysteine-type endopeptidase activity	0.281395	-1.268	3	2	0.00247831	3101142185	Dredd,Mdh2
GO:0048312	intracellular distribution of mitochondria	0.281395	-1.268	3	2	0.00247831	3679331607	clu,Pink1
GO:1903902	positive regulation of viral life cycle	0.281395	-1.268	3	2	0.00247831	3604033905	TER94,Sec61alpha
GO:0036090	cleavage furrow ingression	0.281395	-1.268	3	2	0.00247831	4050642467	Arf79F,Synd
GO:0044183	protein folding chaperone	0.281395	-1.268	3	2	0.00247831	3658341840	Hsc70-5,Hsc70-4
GO:0097120	receptor localization to synapse	0.281395	-1.268	3	2	0.00247831	3208344448	dlg1,scrib
GO:0046037	GMP metabolic process	0.281395	-1.268	3	2	0.00247831	3208344861	dlg1,sdt
GO:0002251	organ or tissue specific immune response	0.281395	-1.268	3	2	0.00247831	4008131376	Mkp3,norpA
GO:0006167	AMP biosynthetic process	0.281395	-1.268	3	2	0.00247831	3947944750	AdenoK,Ady43A
GO:0051262	protein tetramerization	0.281395	-1.268	3	2	0.00247831	3832536060	CG16986,Pfk
GO:0042994	cytoplasmic sequestering of transcription factor	0.281395	-1.268	3	2	0.00247831	3496942186	cact,14-3-3epsilon
GO:0097193	intrinsic apoptotic signaling pathway	0.281395	-1.268	3	2	0.00247831	3327142358	ninaA,Ire1
GO:0051482	positive regulation of cytosolic calcium ion concentration involved in phospholipase C-activating G protein-coupled signaling pathway	0.281395	-1.268	3	2	0.00247831	4066431376	Itp-r83A,norpA
GO:1903053	regulation of extracellular matrix organization	0.281395	-1.268	3	2	0.00247831	3302540694	Rab10,Sec23
GO:0050482	arachidonic acid secretion	0.281395	-1.268	3	2	0.00247831	24665631402	CG30503,CG3009
GO:0090559	regulation of membrane permeability	0.281395	-1.268	3	2	0.00247831	4284541450	Miro,Tango9
GO:0090151	establishment of protein localization to mitochondrial membrane	0.281395	-1.268	3	2	0.00247831	374784379884	Tim10,CG34132
GO:0032309	icosanoid secretion	0.281395	-1.268	3	2	0.00247831	31402246656	CG3009,CG30503
GO:0010823	negative regulation of mitochondrion organization	0.281395	-1.268	3	2	0.00247831	3160741450	Pink1,Tango9
GO:2000377	regulation of reactive oxygen species metabolic process	0.281395	-1.268	3	2	0.00247831	41087117332	Rel,Rheb
GO:0001952	regulation of cell-matrix adhesion	0.281395	-1.268	3	2	0.00247831	4399136740	Pten,Zasp52
GO:0045039	protein insertion into mitochondrial inner membrane	0.281395	-1.268	3	2	0.00247831	437988437478	CG34132,Tim10
GO:1903725	regulation of phospholipid metabolic process	0.281395	-1.268	3	2	0.00247831	3320343991	Pi3K21B,Pten
GO:0070884	regulation of calcineurin-NFAT signaling cascade	0.281395	-1.268	3	2	0.00247831	3704047384	olf186-F,sra
GO:0071715	icosanoid transport	0.281395	-1.268	3	2	0.00247831	24665631402	CG30503,CG3009
GO:0009713	catechol-containing compound biosynthetic process	0.281395	-1.268	3	2	0.00247831	3874631863	ple,t
GO:0030071	regulation of mitotic metaphase/anaphase transition	0.281395	-1.268	3	2	0.00247831	4958047877	Invadolysin,tws
GO:0051898	negative regulation of protein kinase B signaling	0.281395	-1.268	3	2	0.00247831	4595943991	mts,Pten
GO:0046844	chorion micropyle formation	0.281395	-1.268	3	2	0.00247831	3605740958	Jra,puc
GO:0045744	negative regulation of G protein-coupled receptor signaling pathway	0.281395	-1.268	3	2	0.00247831	3507838993	Arr1,Arr2
GO:0106056	regulation of calcineurin-mediated signaling	0.281395	-1.268	3	2	0.00247831	4738437040	sra,olf186-F
GO:0045116	protein neddylation	0.281395	-1.268	3	2	0.00247831	3515139753	Nedd8,Diap1
GO:0110111	negative regulation of animal organ morphogenesis	0.283128	-1.26186	13	6	0.00743494	3.97533e+29	Diap1,norpA,ed,chn,alph,Kr-h1
GO:0045824	negative regulation of innate immune response	0.283128	-1.26186	13	6	0.00743494	4.98043e+31	Spn88Ea,Rala,Prx5,Pli,GlyP,Tim10
GO:0045665	negative regulation of neuron differentiation	0.283128	-1.26186	13	6	0.00743494	4.34814e+29	alph,Pten,Kr-h1,bif,pros,ed
GO:0065002	intracellular protein transmembrane transport	0.283128	-1.26186	13	6	0.00743494	3.88193e+31	Sec63,Tim23,Tom20,CG8206,Sec61alpha,Tom40
GO:0009411	response to UV	0.283128	-1.26186	13	6	0.00743494	4.23983e+29	Rh3,ninaC,14-3-3epsilon,Rh4,alph,CG17059
GO:0071806	protein transmembrane transport	0.283128	-1.26186	13	6	0.00743494	3.3551e+31	Tim23,Tom20,CG8206,Sec61alpha,Tom40,Sec63
GO:0043603	cellular amide metabolic process	0.286586	-1.24972	158	59	0.0731103	36576,42464,35453,32652,37823,42470,39108,38794,43532,41347,50364,34363,31483,43420,40060,34412,39988,41372,37111,33654,47218,36851,43573,33703,31228,41503,33686,32789,42761,32953,34309,43594,44150,38973,31613,40932,31398,32426,50139,36467,37415,42819,31588,43562,36760,34420,36029,39338,31009,40240,45329,40815,38972,59151,36040,3355069,43723,33005,41343	RpS23,RpS20,RpL21,CG4678,Phm,RpS30,RpS9,RpL18,RpS8,RpL3,CG13364,eEF1delta,RpL35,wat,RpL26,mRpS7,CG7430,RpL24-like,GstE6,RpL27A,RpS14a,RpS15,RpL32,mRpL24,tko,GstD1,mxt,scu,RpS3,RpS10b,RpS2,RpS7,RpS15Aa,se,RpL17,mRpS9,mRpL30,pdgy,CG12848,GstE14,Pu,eIF4G2,RpL7A,CG7920,ATPCL,RpS27A,CG1441,RpL10Ab,RpL36,eRF1,RpL12,twr,GstO3,mRpL36,TER94,CG17691,RpL6,Nep3,RpS25
GO:0016070	RNA metabolic process	0.286749	-1.24915	133	50	0.0619579	3772007,41670,32789,43350,42848,38369,39956,43594,40739,47218,35501,34287,41339,35483,42942,42358,32009,36135,31483,42994,246551,49636,40785,43532,31773,34804,33989,31442,43862,37922,35173,35917,41840,32069,39338,36387,41741,44205,31588,44226,37839,7354399,36160,32587,42822,40415,33759,39366,40932,38206	Rpp20,B52,scu,mino,Rox8,CG11486,CG7564,RpS7,Rm62,RpS14a,Not3,CG4364,cu,Nipped-A,Rpb10,Ire1,Imp,CG7637,RpL35,Smg6,CG30343,hrg,CG42724,RpS8,Trf2,Smg5,Caper,snf,HnRNP-K,Nurf-38,Acn,Dbp45A,Hsc70-4,l(1)10Bb,RpL10Ab,spt4,RpII15,spen,RpL7A,Xbp1,Not11,CG17454,Rpb5,caz,TfIIA-S,Rpb8,vri,Pop2,mRpS9,CG7971
GO:0035272	exocrine system development	0.29035	-1.23667	37	15	0.0185874	3.88313e+76	Rac2,l(2)gl,drpr,h,ctp,Pak,NetB,BI-1,raw,Trf2,jeb,Pten,Itp-r83A,btsz,Mdh2
GO:0007431	salivary gland development	0.29035	-1.23667	37	15	0.0185874	4.39914e+76	Pten,Itp-r83A,raw,Trf2,jeb,Mdh2,btsz,NetB,Rac2,drpr,l(2)gl,h,ctp,Pak,BI-1
GO:0034645	cellular macromolecule biosynthetic process	0.29243	-1.22953	175	65	0.0805452	34282,34309,32953,47218,33654,43573,36851,42942,31228,34363,40060,35453,42464,42470,33571,41347,31773,34804,59151,43723,36387,31009,40240,31588,36160,32587,33759,32458,31398,31613,42819,50139,39399,33686,3354921,42761,43594,44150,39383,35483,33703,50364,42994,31483,34412,41372,32909,36576,42550,39108,38794,43532,45329,37922,41343,41823,34420,39338,41741,44205,44226,42822,40415,40932,2768916	GlcAT-S,RpS2,RpS10b,RpS14a,RpL27A,RpL32,RpS15,Rpb10,tko,eEF1delta,RpL26,RpL21,RpS20,RpS30,tim,RpL3,Trf2,Smg5,mRpL36,RpL6,spt4,RpL36,eRF1,RpL7A,Rpb5,caz,vri,Top1,mRpL30,RpL17,eIF4G2,CG12848,app,mxt,Gfat1,RpS3,RpS7,RpS15Aa,Atg12,Nipped-A,mRpL24,CG13364,Smg6,RpL35,mRpS7,RpL24-like,CG7990,RpS23,E2f1,RpS9,RpL18,RpS8,RpL12,Nurf-38,RpS25,GlyS,RpS27A,RpL10Ab,RpII15,spen,Xbp1,TfIIA-S,Rpb8,mRpS9,CG33303
GO:0034332	adherens junction organization	0.292693	-1.22863	21	9	0.0111524	4.36544e+44	cindr,scrib,Rac2,Csk,alpha-Cat,kst,awd,sdt,pyd
GO:0002920	regulation of humoral immune response	0.292693	-1.22863	21	9	0.0111524	3.10113e+44	Dredd,Usp2,Rel,Pitslre,smt3,Pli,Jra,cact,Stat92E
GO:0042593	glucose homeostasis	0.292693	-1.22863	21	9	0.0111524	3.33514e+44	Eno,ATPCL,Pfk,PyK,Ilp2,boss,Tpi,Pgi,Gapdh2
GO:0002759	regulation of antimicrobial humoral response	0.292693	-1.22863	21	9	0.0111524	3.39814e+44	smt3,Pli,Jra,cact,Stat92E,Dredd,Rel,Pitslre,Usp2
GO:1904892	regulation of receptor signaling pathway via STAT	0.292926	-1.22784	8	4	0.00495663	3.20093e+19	Imp,Cnot4,scrib,dlg1
GO:0016791	phosphatase activity	0.292926	-1.22784	8	4	0.00495663	3.29674e+19	CG12237,Mkp3,laza,Mppe
GO:0008594	photoreceptor cell morphogenesis	0.292926	-1.22784	8	4	0.00495663	4.23583e+21	Ire1,Bsg,Lar,tau
GO:0061057	peptidoglycan recognition protein signaling pathway	0.292926	-1.22784	8	4	0.00495663	3.86134e+19	Uev1A,Rel,Listericin,Dredd
GO:0009251	glucan catabolic process	0.292926	-1.22784	8	4	0.00495663	3.94544e+19	Atg1,Atg12,GlyS,GlyP
GO:0043523	regulation of neuron apoptotic process	0.292926	-1.22784	8	4	0.00495663	3.16074e+21	Pink1,RpS3,futsch,TER94
GO:0016999	antibiotic metabolic process	0.292926	-1.22784	8	4	0.00495663	3.77188e+23	Adh,ATPCL,Prx3,Prx5
GO:0042558	pteridine-containing compound metabolic process	0.292926	-1.22784	8	4	0.00495663	3.89733e+19	se,CG12116,pr,Pu
GO:0018108	peptidyl-tyrosine phosphorylation	0.292926	-1.22784	8	4	0.00495663	3.80593e+19	Ptpmeg,ninaC,FER,Csk
GO:0046425	regulation of receptor signaling pathway via JAK-STAT	0.292926	-1.22784	8	4	0.00495663	3.20093e+19	Imp,Cnot4,dlg1,scrib
GO:0044743	protein transmembrane import into intracellular organelle	0.292926	-1.22784	8	4	0.00495663	3.3551e+21	Tim23,CG8206,Tom20,Tom40
GO:0035331	negative regulation of hippo signaling	0.292926	-1.22784	8	4	0.00495663	2.76894e+23	Pp2A-29B,Mob4,mts,par-1
GO:0005980	glycogen catabolic process	0.292926	-1.22784	8	4	0.00495663	3.93834e+19	Atg12,Atg1,GlyP,GlyS
GO:0006536	glutamate metabolic process	0.292926	-1.22784	8	4	0.00495663	3.67824e+19	Got1,P5CDh1,Gdh,Gad1
GO:0009066	aspartate family amino acid metabolic process	0.292926	-1.22784	8	4	0.00495663	3.26189e+20	Adi1,TER94,Got1,CG5955
GO:0008362	chitin-based embryonic cuticle biosynthetic process	0.292926	-1.22784	8	4	0.00495663	3.70384e+19	grh,pio,Gasp,puc
GO:0055072	iron ion homeostasis	0.292926	-1.22784	8	4	0.00495663	4.14074e+19	Ho,Fer2LCH,Fer1HCH,CG6523
GO:0031333	negative regulation of protein complex assembly	0.292926	-1.22784	8	4	0.00495663	3.14594e+19	spoon,tmod,cpa,Cip4
GO:0000288	nuclear-transcribed mRNA catabolic process, deadenylation-dependent decay	0.292926	-1.22784	8	4	0.00495663	4.13394e+19	cu,Not3,CG11486,Pop2
GO:0051924	regulation of calcium ion transport	0.292926	-1.22784	8	4	0.00495663	3.31324e+19	Usp2,olf186-F,homer,Cnx99A
GO:0035332	positive regulation of hippo signaling	0.292926	-1.22784	8	4	0.00495663	4.21863e+19	14-3-3epsilon,ed,Tao,Csk
GO:0050878	regulation of body fluid levels	0.292926	-1.22784	8	4	0.00495663	4.14283e+19	ClC-a,Dh31,fon,trpl
GO:0042157	lipoprotein metabolic process	0.292926	-1.22784	8	4	0.00495663	3.29094e+19	CG7990,Atg12,app,CG18815
GO:0018212	peptidyl-tyrosine modification	0.292926	-1.22784	8	4	0.00495663	3.40124e+19	ninaC,Ptpmeg,FER,Csk
GO:0007306	eggshell chorion assembly	0.293204	-1.22689	29	12	0.0148699	3.14594e+59	spoon,E2f1,ed,gus,Pax,slmb,smt3,puc,RanBPM,Jra,Rac2,cact
GO:0007274	neuromuscular synaptic transmission	0.293204	-1.22689	29	12	0.0148699	3.24703e+59	Scamp,Pink1,Smg6,rut,wit,comt,sky,Tbce,Syx1A,Ten-m,Nrx-1,Slob
GO:0009725	response to hormone	0.303034	-1.19391	40	16	0.0198265	3.80174e+80	Pdk1,Chd64,Kr-h1,Ilp2,Cpr,Rheb,Nurf-38,Jra,Pi3K21B,Pak,l(2)gl,Ilp6,Rab10,PyK,Trf2,Hydr2
GO:0045936	negative regulation of phosphate metabolic process	0.308311	-1.17665	32	13	0.016109	3.47743e+64	ics,Rala,mts,chinmo,ATPsynD,flw,cpa,Pten,raw,Mkp3,puc,alph,l(2)gl
GO:0060828	regulation of canonical Wnt signaling pathway	0.308311	-1.17665	32	13	0.016109	4.42055e+64	spen,tws,Pp1alpha-96A,flw,Klp64D,hyd,mts,Cow,Usp8,TER94,slmb,Diap1,nmo
GO:0010563	negative regulation of phosphorus metabolic process	0.308311	-1.17665	32	13	0.016109	4.48514e+64	raw,flw,ATPsynD,cpa,Pten,chinmo,ics,Rala,mts,l(2)gl,alph,puc,Mkp3
GO:0070887	cellular response to chemical stimulus	0.309868	-1.17161	134	50	0.0619579	117332,44978,33203,37922,36057,36041,41823,37038,33156,36003,33524,43729,41840,38490,40664,39150,44291,35761,36583,44226,33532,38936,33981,39454,40193,37743,42428,44096,44643,37742,45278,31220,42620,33025,45668,44936,36447,35793,38017,34089,42358,3771951,40958,39675,35543,43542,41166,41707,40633,42109	Rheb,Tom40,Pi3K21B,Nurf-38,Jra,Pka-R2,GlyS,grh,l(2)gl,trpl,FASN1,kek6,Hsc70-4,Chd64,Itp-r83A,Ilp2,Idh,ACC,Hsc70-5,Xbp1,Hydr2,BI-1,smt3,Atg1,CG14184,St3,Stat92E,wit,Cnx99A,St1,csw,Ilp6,PyK,Rab10,Vha68-1,Eip93F,GLaz,RagC-D,Pdk1,Sirup,Ire1,Prx5,puc,Eip71CD,Cyp6w1,trp,Calr,CG3061,Hph,Prx3
GO:0006073	cellular glucan metabolic process	0.310759	-1.16874	16	7	0.0086741	3.33863e+34	GlyP,CG7766,GlyS,ACC,FASN1,Atg12,Atg1
GO:0044042	glucan metabolic process	0.310759	-1.16874	16	7	0.0086741	3.94544e+34	Atg1,Atg12,GlyS,FASN1,ACC,GlyP,CG7766
GO:0007310	oocyte dorsal/ventral axis specification	0.310759	-1.16874	16	7	0.0086741	3.50515e+34	BicD,CkIIalpha,flw,cnc,glo,milt,sel
GO:0005977	glycogen metabolic process	0.310759	-1.16874	16	7	0.0086741	3.94544e+34	Atg1,Atg12,FASN1,ACC,GlyS,CG7766,GlyP
GO:0017038	protein import	0.310759	-1.16874	16	7	0.0086741	4.05813e+36	Karybeta3,tim,Tom40,Tim23,Ran,CG8206,Tom20
GO:0006112	energy reserve metabolic process	0.310759	-1.16874	16	7	0.0086741	3.93834e+34	Atg12,Atg1,GlyP,CG7766,FASN1,ACC,GlyS
GO:1903034	regulation of response to wounding	0.310759	-1.16874	16	7	0.0086741	3.70384e+34	grh,Rac2,Imp,Cbp53E,Pkn,Pten,Csp
GO:0002697	regulation of immune effector process	0.311852	-1.16523	24	10	0.0123916	4.02924e+49	Pitslre,Rel,Usp2,me31B,Dredd,cact,Stat92E,Rm62,Pli,smt3
GO:0042706	eye photoreceptor cell fate commitment	0.311852	-1.16523	24	10	0.0123916	3.70384e+49	grh,Jra,scrib,pros,boss,Ire1,lola,csw,Rala,mts
GO:0001752	compound eye photoreceptor fate commitment	0.311852	-1.16523	24	10	0.0123916	4.52784e+49	csw,lola,Rala,mts,pros,boss,Ire1,scrib,grh,Jra
GO:1990778	protein localization to cell periphery	0.311852	-1.16523	24	10	0.0123916	4.05064e+50	Arf79F,stmA,Rab10,scrib,veli,Bsg,Sec23,comt,l(2)gl,TM9SF4
GO:0043900	regulation of multi-organism process	0.312877	-1.16195	98	37	0.0458488	4.10874e+188	Rel,Pitslre,Syx1A,me31B,Bruce,CYLD,Jra,TER94,Spn88Ea,Tim10,Usp2,dlg1,Ide,Dredd,Stat92E,GILT1,Atg1,Sec61alpha,smt3,Rala,bic,Rm62,mdy,Pli,cnc,slmb,Pp1alpha-96A,E2f1,Ptpmeg,cact,Listericin,GlyP,TM9SF4,Prx5,par-1,puc,Diap1
GO:0042335	cuticle development	0.314807	-1.1558	43	17	0.0210657	3.18633e+84	t,sn,Gasp,gus,Cpr67B,sdt,Cpr,grh,l(2)gl,Pu,puc,Sec61alpha,ple,Sec23,pio,Cpr72Ec,Cpr65Au
GO:0042254	ribosome biogenesis	0.325786	-1.12152	46	18	0.0223048	3.42874e+91	CG4364,RpS15,RpL10Ab,Dbp45A,RpS14a,RpL6,RpS7,RpL12,Rpp20,RpS8,RpL3,mRpS9,mRpS7,RpL26,RpL24-like,RpL35,CG7637,RpL7A
GO:0046843	dorsal appendage formation	0.328631	-1.11282	27	11	0.0136307	3.49694e+54	cact,Rac2,Jra,RanBPM,puc,smt3,slmb,Pax,gus,ed,spoon
GO:0050770	regulation of axonogenesis	0.328631	-1.11282	27	11	0.0136307	3.27431e+55	RhoGAPp190,Rheb,Lar,RhoGEF2,Pak,Rac2,NetB,AMPKalpha,sif,pros,bif
GO:1903320	regulation of protein modification by small protein conjugation or removal	0.330893	-1.10596	11	5	0.00619579	3.97534e+24	Diap1,Nedd8,ctrip,hyd,CG17059
GO:0048542	lymph gland development	0.330893	-1.10596	11	5	0.00619579	4.24284e+24	Stat92E,RpS8,lola,E2f1,CG1129
GO:0045747	positive regulation of Notch signaling pathway	0.330893	-1.10596	11	5	0.00619579	4.10624e+24	pyd,lqf,Kul,ed,Fkbp14
GO:0045746	negative regulation of Notch signaling pathway	0.330893	-1.10596	11	5	0.00619579	3.31564e+24	l(2)gl,cue,pyd,Nedd4,Eps-15
GO:0043244	regulation of protein complex disassembly	0.330893	-1.10596	11	5	0.00619579	4.05894e+26	tacc,tmod,cpa,futsch,mlt
GO:0051298	centrosome duplication	0.330893	-1.10596	11	5	0.00619579	4.78775e+28	tws,Invadolysin,mts,Pp2A-29B,CG17493
GO:0009064	glutamine family amino acid metabolic process	0.330893	-1.10596	11	5	0.00619579	3.67824e+24	Got1,TER94,Gad1,P5CDh1,Gdh
GO:1990542	mitochondrial transmembrane transport	0.333247	-1.09887	19	8	0.00991326	3.77222e+43	sea,aralar1,ATPsynbeta,Tim23,Tom20,CG8206,CG1628,Tom40
GO:1902275	regulation of chromatin organization	0.333247	-1.09887	19	8	0.00991326	4.39244e+39	jim,Stat92E,vig2,mamo,CG8036,ctrip,hyd,crol
GO:0032984	protein-containing complex disassembly	0.333247	-1.09887	19	8	0.00991326	4.34424e+39	Vha100-1,Vamp7,comt,TER94,Mical,eRF1,Pp1alpha-96A,flw
GO:0007349	cellularization	0.33459	-1.09485	38	15	0.0185874	3.69154e+74	RhoGEF2,mlt,poe,ctp,TER94,Cip4,Taz,me31B,Syx1A,tacc,Npc1a,Rab5,Dredd,CLIP-190,porin
GO:0007416	synapse assembly	0.33459	-1.09485	38	15	0.0185874	3.20094e+76	Imp,pros,jeb,Pdk1,Ten-m,dlg1,Nrx-1,Mical,wit,caz,Jra,Gad1,Atg1,par-1,Lar
GO:0010975	regulation of neuron projection development	0.336067	-1.09044	49	19	0.023544	4.39914e+95	Pten,sif,pros,tutl,Nedd4,RhoGAPp190,babos,NetB,Rac2,Sec23,RhoGEF2,AMPKalpha,me31B,bif,Kr-h1,Imp,Lar,Rheb,Pak
GO:0048878	chemical homeostasis	0.336658	-1.08869	110	41	0.0508055	4.14283e+205	ClC-a,CYLD,boss,Ilp2,Itp-r83A,CG6523,Rheb,Vha100-1,trpl,CG8177,unc80,shakB,Vha68-1,GstE14,PyK,CG14184,Ndae1,smt3,Cbp53E,Galt,ATPCL,Pgi,norpA,up,MtnA,SREBP,Pfk,bmm,Eno,Capa,Gapdh2,Tpi,Cpn,cue,Fer1HCH,Fer2LCH,Vha68-2,Pten,Drip,Ho,trp
GO:0008358	maternal determination of anterior/posterior axis, embryo	0.343533	-1.06847	30	12	0.0148699	4.59313e+61	spir,l(2)gl,slmb,scrib,par-1,cnc,glo,Tm1,gus,Moe,bic,dlg1
GO:0010564	regulation of cell cycle process	0.343533	-1.06847	30	12	0.0148699	4.36544e+59	cindr,puc,B52,slmb,14-3-3epsilon,Bruce,E2f1,Invadolysin,tws,Moe,Pkn,flw
GO:0007028	cytoplasm organization	0.343533	-1.06847	30	12	0.0148699	4.14314e+61	glo,cnc,scrib,par-1,slmb,spir,dlg1,bic,Rab5,Moe,gus,Tm1
GO:0048024	regulation of mRNA splicing, via spliceosome	0.343533	-1.06847	30	12	0.0148699	4.29584e+61	Saf-B,Dbp45A,Rm62,qkr58E-2,Hrb98DE,Rox8,CG17454,HnRNP-K,snf,mbl,B52,Caper
GO:0022603	regulation of anatomical structure morphogenesis	0.346606	-1.05957	102	38	0.047088	3.66783e+192	chn,norpA,Rala,Kr-h1,pyd,bif,Pak,Pax,raw,FER,Pten,Mlf,par-1,Pink1,RhoGAPp190,Nedd4,Diap1,tutl,scaf,Marf,babos,me31B,AMPKalpha,Opa1,Rheb,Lar,l(2)gl,Mp20,ed,csw,pros,sif,Moe,RhoGEF2,Sec23,Rac2,alph,NetB
GO:0048646	anatomical structure formation involved in morphogenesis	0.346896	-1.05873	172	63	0.0780669	33418,42854,34364,3346167,41248,35728,36057,36040,35051,36072,33156,36468,39002,35042,31459,34358,31011,33619,38534,42620,44289,31816,44540,36295,33262,33981,37853,32400,40694,46243,36915,41398,42428,38831,41225,40589,42186,44132,33461,35478,36405,32314,43814,318841,42504,36060,45931,36102,38006,34500,43582,42550,32337,37387,45012,35215,2768852,40958,43420,36740,43447,31405,34969	Rab5,Syx1A,me31B,btsz,Timp,Gapdh1,Jra,TER94,BicD,mlt,l(2)gl,Mp20,Prm,CLIP-190,spoon,Npc1a,Dredd,ed,Cip4,PyK,flw,Moe,ct,jeb,dock,smt3,Mlp60A,NetB,Sec23,poe,RhoGEF2,Csk,Stat92E,Rac2,Mical,tacc,14-3-3epsilon,slmo,Pgk,gus,Taz,up,bt,Bsg,slmb,Pfk,spir,RanBPM,gol,porin,Tpi,E2f1,Pdcd4,cpa,Vha68-2,Pax,par-1,puc,wat,Zasp52,Pglym78,ctp,cact
GO:0090070	positive regulation of ribosome biogenesis	0.349805	-1.05038	1	1	0.00123916	117332	Rheb
GO:0060385	axonogenesis involved in innervation	0.349805	-1.05038	1	1	0.00123916	41363	pros
GO:2000677	regulation of transcription regulatory region DNA binding	0.349805	-1.05038	1	1	0.00123916	33571	tim
GO:0050912	detection of chemical stimulus involved in sensory perception of taste	0.349805	-1.05038	1	1	0.00123916	31376	norpA
GO:0034633	retinol transport	0.349805	-1.05038	1	1	0.00123916	42646	Nrx-1
GO:0009148	pyrimidine nucleoside triphosphate biosynthetic process	0.349805	-1.05038	1	1	0.00123916	43739	awd
GO:0042480	negative regulation of eye photoreceptor cell development	0.349805	-1.05038	1	1	0.00123916	33861	Kr-h1
GO:0048730	epidermis morphogenesis	0.349805	-1.05038	1	1	0.00123916	33156	l(2)gl
GO:0003091	renal water homeostasis	0.349805	-1.05038	1	1	0.00123916	41428	ClC-a
GO:2000395	regulation of ubiquitin-dependent endocytosis	0.349805	-1.05038	1	1	0.00123916	44861	sdt
GO:0046000	positive regulation of ecdysteroid secretion	0.349805	-1.05038	1	1	0.00123916	40664	Itp-r83A
GO:0034260	negative regulation of GTPase activity	0.349805	-1.05038	1	1	0.00123916	3355133	conu
GO:0030857	negative regulation of epithelial cell differentiation	0.349805	-1.05038	1	1	0.00123916	38059	Ptpmeg
GO:0005220	inositol 1,4,5-trisphosphate-sensitive calcium-release channel activity	0.349805	-1.05038	1	1	0.00123916	40664	Itp-r83A
GO:0015116	sulfate transmembrane transporter activity	0.349805	-1.05038	1	1	0.00123916	41640	Dic1
GO:0015822	ornithine transport	0.349805	-1.05038	1	1	0.00123916	31990	CG1628
GO:0009785	blue light signaling pathway	0.349805	-1.05038	1	1	0.00123916	42305	cry
GO:1903294	regulation of glutamate secretion, neurotransmission	0.349805	-1.05038	1	1	0.00123916	36589	Ih
GO:0002274	myeloid leukocyte activation	0.349805	-1.05038	1	1	0.00123916	33219	crq
GO:1904061	positive regulation of locomotor rhythm	0.349805	-1.05038	1	1	0.00123916	31607	Pink1
GO:0016189	synaptic vesicle to endosome fusion	0.349805	-1.05038	1	1	0.00123916	33418	Rab5
GO:0061724	lipophagy	0.349805	-1.05038	1	1	0.00123916	39454	Atg1
GO:1903940	negative regulation of TORC2 signaling	0.349805	-1.05038	1	1	0.00123916	117332	Rheb
GO:0015884	folic acid transport	0.349805	-1.05038	1	1	0.00123916	35941	CG8026
GO:0042686	regulation of cardioblast cell fate specification	0.349805	-1.05038	1	1	0.00123916	38846	lqf
GO:0019551	glutamate catabolic process to 2-oxoglutarate	0.349805	-1.05038	1	1	0.00123916	42832	Gdh
GO:0005030	neurotrophin receptor activity	0.349805	-1.05038	1	1	0.00123916	43729	kek6
GO:0052646	alditol phosphate metabolic process	0.349805	-1.05038	1	1	0.00123916	43350	mino
GO:0060698	endoribonuclease inhibitor activity	0.349805	-1.05038	1	1	0.00123916	38936	BI-1
GO:0070314	G1 to G0 transition	0.349805	-1.05038	1	1	0.00123916	41363	pros
GO:0044036	cell wall macromolecule metabolic process	0.349805	-1.05038	1	1	0.00123916	40524	beta-Man
GO:0031631	negative regulation of synaptic vesicle fusion to presynaptic active zone membrane	0.349805	-1.05038	1	1	0.00123916	42561	GABA-B-R2
GO:1903540	establishment of protein localization to postsynaptic membrane	0.349805	-1.05038	1	1	0.00123916	44448	scrib
GO:0032877	positive regulation of DNA endoreduplication	0.349805	-1.05038	1	1	0.00123916	42550	E2f1
GO:2000379	positive regulation of reactive oxygen species metabolic process	0.349805	-1.05038	1	1	0.00123916	41087	Rel
GO:0030432	peristalsis	0.349805	-1.05038	1	1	0.00123916	44132	slmo
GO:0009220	pyrimidine ribonucleotide biosynthetic process	0.349805	-1.05038	1	1	0.00123916	43739	awd
GO:0106058	positive regulation of calcineurin-mediated signaling	0.349805	-1.05038	1	1	0.00123916	37040	olf186-F
GO:0045005	DNA-dependent DNA replication maintenance of fidelity	0.349805	-1.05038	1	1	0.00123916	33571	tim
GO:0009449	gamma-aminobutyric acid biosynthetic process	0.349805	-1.05038	1	1	0.00123916	38484	Gad1
GO:0007403	glial cell fate determination	0.349805	-1.05038	1	1	0.00123916	44205	spen
GO:1901222	regulation of NIK/NF-kappaB signaling	0.349805	-1.05038	1	1	0.00123916	41087	Rel
GO:1903055	positive regulation of extracellular matrix organization	0.349805	-1.05038	1	1	0.00123916	40694	Sec23
GO:0010561	negative regulation of glycoprotein biosynthetic process	0.349805	-1.05038	1	1	0.00123916	33260	CG3662
GO:0016116	carotenoid metabolic process	0.349805	-1.05038	1	1	0.00123916	34024	santa-maria
GO:0098908	regulation of neuronal action potential	0.349805	-1.05038	1	1	0.00123916	31607	Pink1
GO:0006388	tRNA splicing, via endonucleolytic cleavage and ligation	0.349805	-1.05038	1	1	0.00123916	246551	CG30343
GO:0070637	pyridine nucleoside metabolic process	0.349805	-1.05038	1	1	0.00123916	38411	CG12016
GO:1901888	regulation of cell junction assembly	0.349805	-1.05038	1	1	0.00123916	43991	Pten
GO:0006716	juvenile hormone metabolic process	0.349805	-1.05038	1	1	0.00123916	251984	Jheh1
GO:0051045	negative regulation of membrane protein ectodomain proteolysis	0.349805	-1.05038	1	1	0.00123916	41248	Timp
GO:0030047	actin modification	0.349805	-1.05038	1	1	0.00123916	41225	Mical
GO:0071333	cellular response to glucose stimulus	0.349805	-1.05038	1	1	0.00123916	39150	Ilp2
GO:2000833	positive regulation of steroid hormone secretion	0.349805	-1.05038	1	1	0.00123916	40664	Itp-r83A
GO:0110072	apical constriction involved in ventral furrow formation	0.349805	-1.05038	1	1	0.00123916	36915	RhoGEF2
GO:0051043	regulation of membrane protein ectodomain proteolysis	0.349805	-1.05038	1	1	0.00123916	41248	Timp
GO:0043687	post-translational protein modification	0.349805	-1.05038	1	1	0.00123916	39383	Atg12
GO:0042304	regulation of fatty acid biosynthetic process	0.349805	-1.05038	1	1	0.00123916	40155	SREBP
GO:0001522	pseudouridine synthesis	0.349805	-1.05038	1	1	0.00123916	36135	CG7637
GO:0009218	pyrimidine ribonucleotide metabolic process	0.349805	-1.05038	1	1	0.00123916	43739	awd
GO:0000963	mitochondrial RNA processing	0.349805	-1.05038	1	1	0.00123916	32789	scu
GO:1905155	positive regulation of membrane invagination	0.349805	-1.05038	1	1	0.00123916	38218	drpr
GO:0003264	regulation of cardioblast proliferation	0.349805	-1.05038	1	1	0.00123916	39958	Nedd4
GO:1902846	positive regulation of mitotic spindle elongation	0.349805	-1.05038	1	1	0.00123916	31816	Moe
GO:0098968	neurotransmitter receptor transport postsynaptic membrane to endosome	0.349805	-1.05038	1	1	0.00123916	44448	scrib
GO:0030728	ovulation	0.349805	-1.05038	1	1	0.00123916	39392	Est-6
GO:0040005	chitin-based cuticle attachment to epithelium	0.349805	-1.05038	1	1	0.00123916	37929	pio
GO:2000136	regulation of cell proliferation involved in heart morphogenesis	0.349805	-1.05038	1	1	0.00123916	39958	Nedd4
GO:0030709	border follicle cell delamination	0.349805	-1.05038	1	1	0.00123916	2768852	par-1
GO:0007375	anterior midgut invagination	0.349805	-1.05038	1	1	0.00123916	36915	RhoGEF2
GO:0050884	neuromuscular process controlling posture	0.349805	-1.05038	1	1	0.00123916	42481	Calx
GO:0019509	L-methionine salvage from methylthioadenosine	0.349805	-1.05038	1	1	0.00123916	326189	Adi1
GO:0033015	tetrapyrrole catabolic process	0.349805	-1.05038	1	1	0.00123916	41407	Ho
GO:1902358	sulfate transmembrane transport	0.349805	-1.05038	1	1	0.00123916	41640	Dic1
GO:0048034	heme O biosynthetic process	0.349805	-1.05038	1	1	0.00123916	34394	CG5037
GO:0070096	mitochondrial outer membrane translocase complex assembly	0.349805	-1.05038	1	1	0.00123916	40189	Tom20
GO:1904503	negative regulation of lipophagy	0.349805	-1.05038	1	1	0.00123916	117332	Rheb
GO:0043111	replication fork arrest	0.349805	-1.05038	1	1	0.00123916	33571	tim
GO:0007171	activation of transmembrane receptor protein tyrosine kinase activity	0.349805	-1.05038	1	1	0.00123916	36295	jeb
GO:0035973	aggrephagy	0.349805	-1.05038	1	1	0.00123916	35246	ref(2)P
GO:0061615	glycolytic process through fructose-6-phosphate	0.349805	-1.05038	1	1	0.00123916	36060	Pfk
GO:0060963	positive regulation of ribosomal protein gene transcription by RNA polymerase II	0.349805	-1.05038	1	1	0.00123916	31773	Trf2
GO:2000252	negative regulation of feeding behavior	0.349805	-1.05038	1	1	0.00123916	39150	Ilp2
GO:1901532	regulation of hematopoietic progenitor cell differentiation	0.349805	-1.05038	1	1	0.00123916	40506	Arf79F
GO:0007343	egg activation	0.349805	-1.05038	1	1	0.00123916	47384	sra
GO:0044070	regulation of anion transport	0.349805	-1.05038	1	1	0.00123916	36589	Ih
GO:0021781	glial cell fate commitment	0.349805	-1.05038	1	1	0.00123916	44205	spen
GO:0072393	microtubule anchoring at microtubule organizing center	0.349805	-1.05038	1	1	0.00123916	31405	ctp
GO:1903726	negative regulation of phospholipid metabolic process	0.349805	-1.05038	1	1	0.00123916	43991	Pten
GO:0061718	glucose catabolic process to pyruvate	0.349805	-1.05038	1	1	0.00123916	36060	Pfk
GO:0006910	phagocytosis, recognition	0.349805	-1.05038	1	1	0.00123916	44071	Mcr
GO:0001561	fatty acid alpha-oxidation	0.349805	-1.05038	1	1	0.00123916	41275	CG14688
GO:0016031	tRNA import into mitochondrion	0.349805	-1.05038	1	1	0.00123916	40189	Tom20
GO:0070536	protein K63-linked deubiquitination	0.349805	-1.05038	1	1	0.00123916	34380	CYLD
GO:0045844	positive regulation of striated muscle tissue development	0.349805	-1.05038	1	1	0.00123916	39958	Nedd4
GO:0061578	Lys63-specific deubiquitinase activity	0.349805	-1.05038	1	1	0.00123916	34380	CYLD
GO:0045470	R8 cell-mediated photoreceptor organization	0.349805	-1.05038	1	1	0.00123916	43146	boss
GO:0010383	cell wall polysaccharide metabolic process	0.349805	-1.05038	1	1	0.00123916	40524	beta-Man
GO:2000738	positive regulation of stem cell differentiation	0.349805	-1.05038	1	1	0.00123916	32337	Pdcd4
GO:0045903	positive regulation of translational fidelity	0.349805	-1.05038	1	1	0.00123916	39108	RpS9
GO:0018401	peptidyl-proline hydroxylation to 4-hydroxy-L-proline	0.349805	-1.05038	1	1	0.00123916	40633	Hph
GO:0015743	malate transport	0.349805	-1.05038	1	1	0.00123916	41640	Dic1
GO:0015574	trehalose transmembrane transporter activity	0.349805	-1.05038	1	1	0.00123916	36248	Tret1-1
GO:0005985	sucrose metabolic process	0.349805	-1.05038	1	1	0.00123916	35265	fbp
GO:0034454	microtubule anchoring at centrosome	0.349805	-1.05038	1	1	0.00123916	31405	ctp
GO:0060962	regulation of ribosomal protein gene transcription by RNA polymerase II	0.349805	-1.05038	1	1	0.00123916	31773	Trf2
GO:0071423	malate transmembrane transport	0.349805	-1.05038	1	1	0.00123916	41640	Dic1
GO:2001270	regulation of cysteine-type endopeptidase activity involved in execution phase of apoptosis	0.349805	-1.05038	1	1	0.00123916	39753	Diap1
GO:0045429	positive regulation of nitric oxide biosynthetic process	0.349805	-1.05038	1	1	0.00123916	41087	Rel
GO:0060222	regulation of retinal cone cell fate commitment	0.349805	-1.05038	1	1	0.00123916	41363	pros
GO:2000105	positive regulation of DNA-dependent DNA replication	0.349805	-1.05038	1	1	0.00123916	42550	E2f1
GO:0015709	thiosulfate transport	0.349805	-1.05038	1	1	0.00123916	41640	Dic1
GO:0045679	regulation of R8 cell differentiation	0.349805	-1.05038	1	1	0.00123916	33619	ed
GO:0036498	IRE1-mediated unfolded protein response	0.349805	-1.05038	1	1	0.00123916	42358	Ire1
GO:0032094	response to food	0.349805	-1.05038	1	1	0.00123916	39150	Ilp2
GO:0060052	neurofilament cytoskeleton organization	0.349805	-1.05038	1	1	0.00123916	5740544	futsch
GO:0042159	lipoprotein catabolic process	0.349805	-1.05038	1	1	0.00123916	59176	CG18815
GO:0006532	aspartate biosynthetic process	0.349805	-1.05038	1	1	0.00123916	36782	Got1
GO:2000043	regulation of cardiac cell fate specification	0.349805	-1.05038	1	1	0.00123916	38846	lqf
GO:2000397	positive regulation of ubiquitin-dependent endocytosis	0.349805	-1.05038	1	1	0.00123916	44861	sdt
GO:2000044	negative regulation of cardiac cell fate specification	0.349805	-1.05038	1	1	0.00123916	38846	lqf
GO:0046864	isoprenoid transport	0.349805	-1.05038	1	1	0.00123916	42646	Nrx-1
GO:0099068	postsynapse assembly	0.349805	-1.05038	1	1	0.00123916	42646	Nrx-1
GO:0015770	sucrose transport	0.349805	-1.05038	1	1	0.00123916	36248	Tret1-1
GO:0015768	maltose transport	0.349805	-1.05038	1	1	0.00123916	36248	Tret1-1
GO:0030321	transepithelial chloride transport	0.349805	-1.05038	1	1	0.00123916	41428	ClC-a
GO:0032261	purine nucleotide salvage	0.349805	-1.05038	1	1	0.00123916	32352	AMPdeam
GO:0006843	mitochondrial citrate transmembrane transport	0.349805	-1.05038	1	1	0.00123916	3772221	sea
GO:1905515	non-motile cilium assembly	0.349805	-1.05038	1	1	0.00123916	38611	Klp64D
GO:0060623	regulation of chromosome condensation	0.349805	-1.05038	1	1	0.00123916	42504	slmb
GO:2000302	positive regulation of synaptic vesicle exocytosis	0.349805	-1.05038	1	1	0.00123916	35051	BicD
GO:0071476	cellular hypotonic response	0.349805	-1.05038	1	1	0.00123916	37800	kcc
GO:0052129	negative energy taxis	0.349805	-1.05038	1	1	0.00123916	33571	tim
GO:0001692	histamine metabolic process	0.349805	-1.05038	1	1	0.00123916	31863	t
GO:0006450	regulation of translational fidelity	0.349805	-1.05038	1	1	0.00123916	39108	RpS9
GO:0006228	UTP biosynthetic process	0.349805	-1.05038	1	1	0.00123916	43739	awd
GO:0071108	protein K48-linked deubiquitination	0.349805	-1.05038	1	1	0.00123916	33132	Usp2
GO:0051131	chaperone-mediated protein complex assembly	0.349805	-1.05038	1	1	0.00123916	40138	Lon
GO:1901190	regulation of formation of translation initiation ternary complex	0.349805	-1.05038	1	1	0.00123916	33686	mxt
GO:0035046	pronuclear migration	0.349805	-1.05038	1	1	0.00123916	40589	tacc
GO:1901562	response to paraquat	0.349805	-1.05038	1	1	0.00123916	43481	alph
GO:0031543	peptidyl-proline dioxygenase activity	0.349805	-1.05038	1	1	0.00123916	40633	Hph
GO:0018197	peptidyl-aspartic acid modification	0.349805	-1.05038	1	1	0.00123916	36778	Asph
GO:0043174	nucleoside salvage	0.349805	-1.05038	1	1	0.00123916	39479	AdenoK
GO:0006501	C-terminal protein lipidation	0.349805	-1.05038	1	1	0.00123916	39383	Atg12
GO:0018410	C-terminal protein amino acid modification	0.349805	-1.05038	1	1	0.00123916	39383	Atg12
GO:0048211	Golgi vesicle docking	0.349805	-1.05038	1	1	0.00123916	47091	comt
GO:0035965	cardiolipin acyl-chain remodeling	0.349805	-1.05038	1	1	0.00123916	36405	Taz
GO:0001193	maintenance of transcriptional fidelity during DNA-templated transcription elongation from RNA polymerase II promoter	0.349805	-1.05038	1	1	0.00123916	41741	RpII15
GO:1905208	negative regulation of cardiocyte differentiation	0.349805	-1.05038	1	1	0.00123916	38846	lqf
GO:0010165	response to X-ray	0.349805	-1.05038	1	1	0.00123916	42428	Stat92E
GO:1901142	insulin metabolic process	0.349805	-1.05038	1	1	0.00123916	40248	Ide
GO:0017003	protein-heme linkage	0.349805	-1.05038	1	1	0.00123916	42590	Cchl
GO:0042683	negative regulation of compound eye cone cell fate specification	0.349805	-1.05038	1	1	0.00123916	36678	chn
GO:0060572	morphogenesis of an epithelial bud	0.349805	-1.05038	1	1	0.00123916	44540	ct
GO:0019405	alditol catabolic process	0.349805	-1.05038	1	1	0.00123916	43582	Tpi
GO:0010812	negative regulation of cell-substrate adhesion	0.349805	-1.05038	1	1	0.00123916	43991	Pten
GO:1905034	regulation of antifungal innate immune response	0.349805	-1.05038	1	1	0.00123916	42821	Pli
GO:2001256	regulation of store-operated calcium entry	0.349805	-1.05038	1	1	0.00123916	33944	homer
GO:0061620	glycolytic process through glucose-6-phosphate	0.349805	-1.05038	1	1	0.00123916	36060	Pfk
GO:0032264	IMP salvage	0.349805	-1.05038	1	1	0.00123916	32352	AMPdeam
GO:0005993	trehalose catabolic process	0.349805	-1.05038	1	1	0.00123916	45368	Treh
GO:1903361	protein localization to basolateral plasma membrane	0.349805	-1.05038	1	1	0.00123916	43003	veli
GO:1901889	negative regulation of cell junction assembly	0.349805	-1.05038	1	1	0.00123916	43991	Pten
GO:1901881	positive regulation of protein depolymerization	0.349805	-1.05038	1	1	0.00123916	36072	mlt
GO:0006858	extracellular transport	0.349805	-1.05038	1	1	0.00123916	42733	Cow
GO:0051969	regulation of transmission of nerve impulse	0.349805	-1.05038	1	1	0.00123916	31607	Pink1
GO:0050958	magnetoreception	0.349805	-1.05038	1	1	0.00123916	42305	cry
GO:0048098	antennal joint development	0.349805	-1.05038	1	1	0.00123916	44540	ct
GO:0042116	macrophage activation	0.349805	-1.05038	1	1	0.00123916	33219	crq
GO:0006166	purine ribonucleoside salvage	0.349805	-1.05038	1	1	0.00123916	39479	AdenoK
GO:1900271	regulation of long-term synaptic potentiation	0.349805	-1.05038	1	1	0.00123916	36905	Cbp53E
GO:0051567	histone H3-K9 methylation	0.349805	-1.05038	1	1	0.00123916	43016	vig2
GO:0046972	histone acetyltransferase activity (H4-K16 specific)	0.349805	-1.05038	1	1	0.00123916	32318	tth
GO:1902895	positive regulation of pri-miRNA transcription by RNA polymerase II	0.349805	-1.05038	1	1	0.00123916	40155	SREBP
GO:0050850	positive regulation of calcium-mediated signaling	0.349805	-1.05038	1	1	0.00123916	37040	olf186-F
GO:0006210	thymine catabolic process	0.349805	-1.05038	1	1	0.00123916	30995	CG17896
GO:0046359	butyrate catabolic process	0.349805	-1.05038	1	1	0.00123916	42364	Arc42
GO:0015771	trehalose transport	0.349805	-1.05038	1	1	0.00123916	36248	Tret1-1
GO:0006003	fructose 2,6-bisphosphate metabolic process	0.349805	-1.05038	1	1	0.00123916	32938	Pfrx
GO:0040031	snRNA modification	0.349805	-1.05038	1	1	0.00123916	36135	CG7637
GO:0045740	positive regulation of DNA replication	0.349805	-1.05038	1	1	0.00123916	42550	E2f1
GO:0016998	cell wall macromolecule catabolic process	0.349805	-1.05038	1	1	0.00123916	40524	beta-Man
GO:0061738	late endosomal microautophagy	0.349805	-1.05038	1	1	0.00123916	41840	Hsc70-4
GO:0060253	negative regulation of glial cell proliferation	0.349805	-1.05038	1	1	0.00123916	42504	slmb
GO:1903392	negative regulation of adherens junction organization	0.349805	-1.05038	1	1	0.00123916	43991	Pten
GO:0010637	negative regulation of mitochondrial fusion	0.349805	-1.05038	1	1	0.00123916	31607	Pink1
GO:1902236	negative regulation of endoplasmic reticulum stress-induced intrinsic apoptotic signaling pathway	0.349805	-1.05038	1	1	0.00123916	36578	Opa1
GO:0015910	long-chain fatty acid import into peroxisome	0.349805	-1.05038	1	1	0.00123916	32992	Pmp70
GO:0050891	multicellular organismal water homeostasis	0.349805	-1.05038	1	1	0.00123916	41428	ClC-a
GO:0045912	negative regulation of carbohydrate metabolic process	0.349805	-1.05038	1	1	0.00123916	39150	Ilp2
GO:0015137	citrate transmembrane transporter activity	0.349805	-1.05038	1	1	0.00123916	40049	Indy
GO:0003331	positive regulation of extracellular matrix constituent secretion	0.349805	-1.05038	1	1	0.00123916	40694	Sec23
GO:0002810	regulation of antifungal peptide biosynthetic process	0.349805	-1.05038	1	1	0.00123916	41087	Rel
GO:1905062	positive regulation of cardioblast proliferation	0.349805	-1.05038	1	1	0.00123916	39958	Nedd4
GO:0019102	male somatic sex determination	0.349805	-1.05038	1	1	0.00123916	33343	chinmo
GO:2000104	negative regulation of DNA-dependent DNA replication	0.349805	-1.05038	1	1	0.00123916	33571	tim
GO:0007425	epithelial cell fate determination, open tracheal system	0.349805	-1.05038	1	1	0.00123916	43991	Pten
GO:0042676	compound eye cone cell fate commitment	0.349805	-1.05038	1	1	0.00123916	41363	pros
GO:0032011	ARF protein signal transduction	0.349805	-1.05038	1	1	0.00123916	40506	Arf79F
GO:1904457	positive regulation of neuronal action potential	0.349805	-1.05038	1	1	0.00123916	31607	Pink1
GO:0071470	cellular response to osmotic stress	0.349805	-1.05038	1	1	0.00123916	37800	kcc
GO:0071554	cell wall organization or biogenesis	0.349805	-1.05038	1	1	0.00123916	40524	beta-Man
GO:0110028	positive regulation of mitotic spindle organization	0.349805	-1.05038	1	1	0.00123916	31816	Moe
GO:1901863	positive regulation of muscle tissue development	0.349805	-1.05038	1	1	0.00123916	39958	Nedd4
GO:0006072	glycerol-3-phosphate metabolic process	0.349805	-1.05038	1	1	0.00123916	43350	mino
GO:0071331	cellular response to hexose stimulus	0.349805	-1.05038	1	1	0.00123916	39150	Ilp2
GO:0071267	L-methionine salvage	0.349805	-1.05038	1	1	0.00123916	326189	Adi1
GO:1902235	regulation of endoplasmic reticulum stress-induced intrinsic apoptotic signaling pathway	0.349805	-1.05038	1	1	0.00123916	36578	Opa1
GO:0042673	regulation of retinal cone cell fate specification	0.349805	-1.05038	1	1	0.00123916	41363	pros
GO:0000064	L-ornithine transmembrane transporter activity	0.349805	-1.05038	1	1	0.00123916	31990	CG1628
GO:0015669	gas transport	0.349805	-1.05038	1	1	0.00123916	41930	glob1
GO:0046036	CTP metabolic process	0.349805	-1.05038	1	1	0.00123916	43739	awd
GO:0042984	regulation of amyloid precursor protein biosynthetic process	0.349805	-1.05038	1	1	0.00123916	33260	CG3662
GO:0045297	post-mating behavior	0.349805	-1.05038	1	1	0.00123916	49821	EbpIII
GO:2000678	negative regulation of transcription regulatory region DNA binding	0.349805	-1.05038	1	1	0.00123916	33571	tim
GO:0051054	positive regulation of DNA metabolic process	0.349805	-1.05038	1	1	0.00123916	42761	RpS3
GO:1905306	positive regulation of cardiac myofibril assembly	0.349805	-1.05038	1	1	0.00123916	39958	Nedd4
GO:0009082	branched-chain amino acid biosynthetic process	0.349805	-1.05038	1	1	0.00123916	32297	CG1673
GO:0046957	negative phototaxis	0.349805	-1.05038	1	1	0.00123916	33571	tim
GO:0006530	asparagine catabolic process	0.349805	-1.05038	1	1	0.00123916	36040	TER94
GO:0097105	presynaptic membrane assembly	0.349805	-1.05038	1	1	0.00123916	42646	Nrx-1
GO:0009635	response to herbicide	0.349805	-1.05038	1	1	0.00123916	43481	alph
GO:0046149	pigment catabolic process	0.349805	-1.05038	1	1	0.00123916	41407	Ho
GO:0042149	cellular response to glucose starvation	0.349805	-1.05038	1	1	0.00123916	43904	AMPKalpha
GO:0098969	neurotransmitter receptor transport to postsynaptic membrane	0.349805	-1.05038	1	1	0.00123916	44448	scrib
GO:0010677	negative regulation of cellular carbohydrate metabolic process	0.349805	-1.05038	1	1	0.00123916	39150	Ilp2
GO:0019099	female germ-line sex determination	0.349805	-1.05038	1	1	0.00123916	31442	snf
GO:0050907	detection of chemical stimulus involved in sensory perception	0.349805	-1.05038	1	1	0.00123916	31376	norpA
GO:0008272	sulfate transport	0.349805	-1.05038	1	1	0.00123916	41640	Dic1
GO:0061621	canonical glycolysis	0.349805	-1.05038	1	1	0.00123916	36060	Pfk
GO:0003746	translation elongation factor activity	0.349805	-1.05038	1	1	0.00123916	34363	eEF1delta
GO:1905618	positive regulation of miRNA mediated inhibition of translation	0.349805	-1.05038	1	1	0.00123916	34364	me31B
GO:1904407	positive regulation of nitric oxide metabolic process	0.349805	-1.05038	1	1	0.00123916	41087	Rel
GO:1901522	positive regulation of transcription from RNA polymerase II promoter involved in cellular response to chemical stimulus	0.349805	-1.05038	1	1	0.00123916	44226	Xbp1
GO:0003872	6-phosphofructokinase activity	0.349805	-1.05038	1	1	0.00123916	36060	Pfk
GO:0010225	response to UV-C	0.349805	-1.05038	1	1	0.00123916	43481	alph
GO:0071938	vitamin A transport	0.349805	-1.05038	1	1	0.00123916	42646	Nrx-1
GO:0035290	trunk segmentation	0.349805	-1.05038	1	1	0.00123916	38995	h
GO:0009099	valine biosynthetic process	0.349805	-1.05038	1	1	0.00123916	32297	CG1673
GO:0031339	negative regulation of vesicle fusion	0.349805	-1.05038	1	1	0.00123916	42561	GABA-B-R2
GO:0051490	negative regulation of filopodium assembly	0.349805	-1.05038	1	1	0.00123916	37387	cpa
GO:0048106	establishment of thoracic bristle planar orientation	0.349805	-1.05038	1	1	0.00123916	44205	spen
GO:0009208	pyrimidine ribonucleoside triphosphate metabolic process	0.349805	-1.05038	1	1	0.00123916	43739	awd
GO:0010918	positive regulation of mitochondrial membrane potential	0.349805	-1.05038	1	1	0.00123916	36583	Hsc70-5
GO:0098900	regulation of action potential	0.349805	-1.05038	1	1	0.00123916	31607	Pink1
GO:0015729	oxaloacetate transport	0.349805	-1.05038	1	1	0.00123916	41640	Dic1
GO:0018345	protein palmitoylation	0.349805	-1.05038	1	1	0.00123916	39399	app
GO:1905446	regulation of mitochondrial ATP synthesis coupled electron transport	0.349805	-1.05038	1	1	0.00123916	31607	Pink1
GO:0007263	nitric oxide mediated signal transduction	0.349805	-1.05038	1	1	0.00123916	43541	Capa
GO:2000434	regulation of protein neddylation	0.349805	-1.05038	1	1	0.00123916	50227	CG17059
GO:0006021	inositol biosynthetic process	0.349805	-1.05038	1	1	0.00123916	35671	Inos
GO:0000076	DNA replication checkpoint	0.349805	-1.05038	1	1	0.00123916	33571	tim
GO:0006069	ethanol oxidation	0.349805	-1.05038	1	1	0.00123916	3771877	Adh
GO:0006714	sesquiterpenoid metabolic process	0.349805	-1.05038	1	1	0.00123916	251984	Jheh1
GO:0099116	tRNA 5'-end processing	0.349805	-1.05038	1	1	0.00123916	3772007	Rpp20
GO:1900103	positive regulation of endoplasmic reticulum unfolded protein response	0.349805	-1.05038	1	1	0.00123916	44226	Xbp1
GO:0061332	Malpighian tubule bud morphogenesis	0.349805	-1.05038	1	1	0.00123916	44540	ct
GO:0009313	oligosaccharide catabolic process	0.349805	-1.05038	1	1	0.00123916	45368	Treh
GO:0000966	RNA 5'-end processing	0.349805	-1.05038	1	1	0.00123916	3772007	Rpp20
GO:0031991	regulation of actomyosin contractile ring contraction	0.349805	-1.05038	1	1	0.00123916	44289	flw
GO:0009188	ribonucleoside diphosphate biosynthetic process	0.349805	-1.05038	1	1	0.00123916	37834	Adk2
GO:0006651	diacylglycerol biosynthetic process	0.349805	-1.05038	1	1	0.00123916	31376	norpA
GO:0030517	negative regulation of axon extension	0.349805	-1.05038	1	1	0.00123916	32119	bif
GO:0007366	periodic partitioning by pair rule gene	0.349805	-1.05038	1	1	0.00123916	38995	h
GO:0090176	microtubule cytoskeleton organization involved in establishment of planar polarity	0.349805	-1.05038	1	1	0.00123916	2768852	par-1
GO:0051955	regulation of amino acid transport	0.349805	-1.05038	1	1	0.00123916	36589	Ih
GO:0043553	negative regulation of phosphatidylinositol 3-kinase activity	0.349805	-1.05038	1	1	0.00123916	43991	Pten
GO:0035674	tricarboxylic acid transmembrane transport	0.349805	-1.05038	1	1	0.00123916	3772221	sea
GO:0061074	regulation of neural retina development	0.349805	-1.05038	1	1	0.00123916	41363	pros
GO:0008656	cysteine-type endopeptidase activator activity involved in apoptotic process	0.349805	-1.05038	1	1	0.00123916	31011	Dredd
GO:0038179	neurotrophin signaling pathway	0.349805	-1.05038	1	1	0.00123916	43729	kek6
GO:0042264	peptidyl-aspartic acid hydroxylation	0.349805	-1.05038	1	1	0.00123916	36778	Asph
GO:0006551	leucine metabolic process	0.349805	-1.05038	1	1	0.00123916	32297	CG1673
GO:0007290	spermatid nucleus elongation	0.349805	-1.05038	1	1	0.00123916	31405	ctp
GO:0001682	tRNA 5'-leader removal	0.349805	-1.05038	1	1	0.00123916	3772007	Rpp20
GO:0071477	cellular hypotonic salinity response	0.349805	-1.05038	1	1	0.00123916	37800	kcc
GO:0018230	peptidyl-L-cysteine S-palmitoylation	0.349805	-1.05038	1	1	0.00123916	39399	app
GO:0016107	sesquiterpenoid catabolic process	0.349805	-1.05038	1	1	0.00123916	251984	Jheh1
GO:0006788	heme oxidation	0.349805	-1.05038	1	1	0.00123916	41407	Ho
GO:1990108	protein linear deubiquitination	0.349805	-1.05038	1	1	0.00123916	34380	CYLD
GO:0033501	galactose homeostasis	0.349805	-1.05038	1	1	0.00123916	33935	Galt
GO:0031120	snRNA pseudouridine synthesis	0.349805	-1.05038	1	1	0.00123916	36135	CG7637
GO:0061817	endoplasmic reticulum-plasma membrane tethering	0.349805	-1.05038	1	1	0.00123916	42929	Esyt2
GO:0048076	regulation of compound eye pigmentation	0.349805	-1.05038	1	1	0.00123916	31607	Pink1
GO:0009235	cobalamin metabolic process	0.349805	-1.05038	1	1	0.00123916	31857	CG12118
GO:0042321	negative regulation of circadian sleep/wake cycle, sleep	0.349805	-1.05038	1	1	0.00123916	32378	Fbxl4
GO:0097199	cysteine-type endopeptidase activity involved in apoptotic signaling pathway	0.349805	-1.05038	1	1	0.00123916	31011	Dredd
GO:0043149	stress fiber assembly	0.349805	-1.05038	1	1	0.00123916	41852	Tm1
GO:0098664	G protein-coupled serotonin receptor signaling pathway	0.349805	-1.05038	1	1	0.00123916	40575	5-HT2A
GO:0016115	terpenoid catabolic process	0.349805	-1.05038	1	1	0.00123916	251984	Jheh1
GO:0006172	ADP biosynthetic process	0.349805	-1.05038	1	1	0.00123916	37834	Adk2
GO:1990380	Lys48-specific deubiquitinase activity	0.349805	-1.05038	1	1	0.00123916	33132	Usp2
GO:0045316	negative regulation of compound eye photoreceptor development	0.349805	-1.05038	1	1	0.00123916	33861	Kr-h1
GO:0007253	cytoplasmic sequestering of NF-kappaB	0.349805	-1.05038	1	1	0.00123916	34969	cact
GO:0019207	kinase regulator activity	0.349805	-1.05038	1	1	0.00123916	42821	Pli
GO:0002021	response to dietary excess	0.349805	-1.05038	1	1	0.00123916	40248	Ide
GO:1902946	protein localization to early endosome	0.349805	-1.05038	1	1	0.00123916	44448	scrib
GO:0060100	positive regulation of phagocytosis, engulfment	0.349805	-1.05038	1	1	0.00123916	38218	drpr
GO:0033194	response to hydroperoxide	0.349805	-1.05038	1	1	0.00123916	38413	PHGPx
GO:1903428	positive regulation of reactive oxygen species biosynthetic process	0.349805	-1.05038	1	1	0.00123916	41087	Rel
GO:0071709	membrane assembly	0.349805	-1.05038	1	1	0.00123916	42646	Nrx-1
GO:0046352	disaccharide catabolic process	0.349805	-1.05038	1	1	0.00123916	45368	Treh
GO:0007287	Nebenkern assembly	0.349805	-1.05038	1	1	0.00123916	45683	milt
GO:0035172	hemocyte proliferation	0.349805	-1.05038	1	1	0.00123916	42428	Stat92E
GO:0030710	regulation of border follicle cell delamination	0.349805	-1.05038	1	1	0.00123916	32083	dlg1
GO:0098877	neurotransmitter receptor transport to plasma membrane	0.349805	-1.05038	1	1	0.00123916	44448	scrib
GO:0006748	lipoamide metabolic process	0.349805	-1.05038	1	1	0.00123916	39988	CG7430
GO:1902001	fatty acid transmembrane transport	0.349805	-1.05038	1	1	0.00123916	32992	Pmp70
GO:0070262	peptidyl-serine dephosphorylation	0.349805	-1.05038	1	1	0.00123916	47877	tws
GO:0030034	microvillar actin bundle assembly	0.349805	-1.05038	1	1	0.00123916	31717	sn
GO:1905035	negative regulation of antifungal innate immune response	0.349805	-1.05038	1	1	0.00123916	42821	Pli
GO:0043928	exonucleolytic catabolism of deadenylated mRNA	0.349805	-1.05038	1	1	0.00123916	39366	Pop2
GO:0007210	serotonin receptor signaling pathway	0.349805	-1.05038	1	1	0.00123916	40575	5-HT2A
GO:0006241	CTP biosynthetic process	0.349805	-1.05038	1	1	0.00123916	43739	awd
GO:0035156	fusion cell fate specification	0.349805	-1.05038	1	1	0.00123916	41062	pyd
GO:0032887	regulation of spindle elongation	0.349805	-1.05038	1	1	0.00123916	31816	Moe
GO:0036058	filtration diaphragm assembly	0.349805	-1.05038	1	1	0.00123916	41062	pyd
GO:0007561	imaginal disc eversion	0.349805	-1.05038	1	1	0.00123916	40958	puc
GO:0035377	transepithelial water transport	0.349805	-1.05038	1	1	0.00123916	41428	ClC-a
GO:0014013	regulation of gliogenesis	0.349805	-1.05038	1	1	0.00123916	42504	slmb
GO:0051893	regulation of focal adhesion assembly	0.349805	-1.05038	1	1	0.00123916	43991	Pten
GO:0003330	regulation of extracellular matrix constituent secretion	0.349805	-1.05038	1	1	0.00123916	40694	Sec23
GO:0046051	UTP metabolic process	0.349805	-1.05038	1	1	0.00123916	43739	awd
GO:2001022	positive regulation of response to DNA damage stimulus	0.349805	-1.05038	1	1	0.00123916	42761	RpS3
GO:0015140	malate transmembrane transporter activity	0.349805	-1.05038	1	1	0.00123916	41640	Dic1
GO:0019626	short-chain fatty acid catabolic process	0.349805	-1.05038	1	1	0.00123916	42364	Arc42
GO:0032890	regulation of organic acid transport	0.349805	-1.05038	1	1	0.00123916	36589	Ih
GO:0048073	regulation of eye pigmentation	0.349805	-1.05038	1	1	0.00123916	31607	Pink1
GO:0008070	maternal determination of dorsal/ventral axis, ovarian follicular epithelium, germ-line encoded	0.349805	-1.05038	1	1	0.00123916	31459	spoon
GO:0018231	peptidyl-S-diacylglycerol-L-cysteine biosynthetic process from peptidyl-cysteine	0.349805	-1.05038	1	1	0.00123916	39399	app
GO:1905209	positive regulation of cardiocyte differentiation	0.349805	-1.05038	1	1	0.00123916	39958	Nedd4
GO:0072488	ammonium transmembrane transport	0.349805	-1.05038	1	1	0.00123916	38589	Rh50
GO:0048478	replication fork protection	0.349805	-1.05038	1	1	0.00123916	33571	tim
GO:0070886	positive regulation of calcineurin-NFAT signaling cascade	0.349805	-1.05038	1	1	0.00123916	37040	olf186-F
GO:0052650	NADP-retinol dehydrogenase activity	0.349805	-1.05038	1	1	0.00123916	42211	CG7675
GO:0006566	threonine metabolic process	0.349805	-1.05038	1	1	0.00123916	40268	CG5955
GO:0045201	maintenance of neuroblast polarity	0.349805	-1.05038	1	1	0.00123916	47877	tws
GO:0032785	negative regulation of DNA-templated transcription, elongation	0.349805	-1.05038	1	1	0.00123916	36387	spt4
GO:2000576	positive regulation of microtubule motor activity	0.349805	-1.05038	1	1	0.00123916	31405	ctp
GO:0043461	proton-transporting ATP synthase complex assembly	0.349805	-1.05038	1	1	0.00123916	42020	CG10340
GO:2000725	regulation of cardiac muscle cell differentiation	0.349805	-1.05038	1	1	0.00123916	39958	Nedd4
GO:0046184	aldehyde biosynthetic process	0.349805	-1.05038	1	1	0.00123916	43582	Tpi
GO:0032888	regulation of mitotic spindle elongation	0.349805	-1.05038	1	1	0.00123916	31816	Moe
GO:0045900	negative regulation of translational elongation	0.349805	-1.05038	1	1	0.00123916	38883	Srp9
GO:0009448	gamma-aminobutyric acid metabolic process	0.349805	-1.05038	1	1	0.00123916	38484	Gad1
GO:0070528	protein kinase C signaling	0.349805	-1.05038	1	1	0.00123916	42836	CG31140
GO:0060236	regulation of mitotic spindle organization	0.349805	-1.05038	1	1	0.00123916	31816	Moe
GO:1902893	regulation of pri-miRNA transcription by RNA polymerase II	0.349805	-1.05038	1	1	0.00123916	40155	SREBP
GO:0045818	negative regulation of glycogen catabolic process	0.349805	-1.05038	1	1	0.00123916	39150	Ilp2
GO:0071000	response to magnetism	0.349805	-1.05038	1	1	0.00123916	42305	cry
GO:0042407	cristae formation	0.349805	-1.05038	1	1	0.00123916	41959	CG5903
GO:0035289	posterior head segmentation	0.349805	-1.05038	1	1	0.00123916	38995	h
GO:0043490	malate-aspartate shuttle	0.349805	-1.05038	1	1	0.00123916	43616	aralar1
GO:0071483	cellular response to blue light	0.349805	-1.05038	1	1	0.00123916	42305	cry
GO:0019310	inositol catabolic process	0.349805	-1.05038	1	1	0.00123916	39391	CG6910
GO:0006735	NADH regeneration	0.349805	-1.05038	1	1	0.00123916	36060	Pfk
GO:0030238	male sex determination	0.349805	-1.05038	1	1	0.00123916	33343	chinmo
GO:1902866	regulation of retina development in camera-type eye	0.349805	-1.05038	1	1	0.00123916	41363	pros
GO:0035927	RNA import into mitochondrion	0.349805	-1.05038	1	1	0.00123916	40189	Tom20
GO:0071486	cellular response to high light intensity	0.349805	-1.05038	1	1	0.00123916	35620	Tsp42Ej
GO:0006103	2-oxoglutarate metabolic process	0.349805	-1.05038	1	1	0.00123916	42832	Gdh
GO:0150011	regulation of neuron projection arborization	0.349805	-1.05038	1	1	0.00123916	34364	me31B
GO:0009136	purine nucleoside diphosphate biosynthetic process	0.349805	-1.05038	1	1	0.00123916	37834	Adk2
GO:0001694	histamine biosynthetic process	0.349805	-1.05038	1	1	0.00123916	31863	t
GO:2000138	positive regulation of cell proliferation involved in heart morphogenesis	0.349805	-1.05038	1	1	0.00123916	39958	Nedd4
GO:1902956	regulation of mitochondrial electron transport, NADH to ubiquinone	0.349805	-1.05038	1	1	0.00123916	31607	Pink1
GO:0048078	positive regulation of compound eye pigmentation	0.349805	-1.05038	1	1	0.00123916	31607	Pink1
GO:0009304	tRNA transcription	0.349805	-1.05038	1	1	0.00123916	42942	Rpb10
GO:2000580	regulation of ATP-dependent microtubule motor activity, plus-end-directed	0.349805	-1.05038	1	1	0.00123916	31405	ctp
GO:1903426	regulation of reactive oxygen species biosynthetic process	0.349805	-1.05038	1	1	0.00123916	41087	Rel
GO:0019605	butyrate metabolic process	0.349805	-1.05038	1	1	0.00123916	42364	Arc42
GO:0048033	heme o metabolic process	0.349805	-1.05038	1	1	0.00123916	34394	CG5037
GO:0045873	negative regulation of sevenless signaling pathway	0.349805	-1.05038	1	1	0.00123916	43481	alph
GO:0002084	protein depalmitoylation	0.349805	-1.05038	1	1	0.00123916	59176	CG18815
GO:0006189	'de novo' IMP biosynthetic process	0.349805	-1.05038	1	1	0.00123916	42973	CG11089
GO:1901143	insulin catabolic process	0.349805	-1.05038	1	1	0.00123916	40248	Ide
GO:0006071	glycerol metabolic process	0.349805	-1.05038	1	1	0.00123916	43582	Tpi
GO:0015766	disaccharide transport	0.349805	-1.05038	1	1	0.00123916	36248	Tret1-1
GO:0008156	negative regulation of DNA replication	0.349805	-1.05038	1	1	0.00123916	33571	tim
GO:0099639	neurotransmitter receptor transport, endosome to plasma membrane	0.349805	-1.05038	1	1	0.00123916	44448	scrib
GO:0006116	NADH oxidation	0.349805	-1.05038	1	1	0.00123916	42832	Gdh
GO:0019682	glyceraldehyde-3-phosphate metabolic process	0.349805	-1.05038	1	1	0.00123916	43582	Tpi
GO:1903939	regulation of TORC2 signaling	0.349805	-1.05038	1	1	0.00123916	117332	Rheb
GO:0006567	threonine catabolic process	0.349805	-1.05038	1	1	0.00123916	40268	CG5955
GO:2001271	negative regulation of cysteine-type endopeptidase activity involved in execution phase of apoptosis	0.349805	-1.05038	1	1	0.00123916	39753	Diap1
GO:0034219	carbohydrate transmembrane transport	0.349805	-1.05038	1	1	0.00123916	39670	CG7272
GO:2000582	positive regulation of ATP-dependent microtubule motor activity, plus-end-directed	0.349805	-1.05038	1	1	0.00123916	31405	ctp
GO:1902356	oxaloacetate(2-) transmembrane transport	0.349805	-1.05038	1	1	0.00123916	41640	Dic1
GO:0032875	regulation of DNA endoreduplication	0.349805	-1.05038	1	1	0.00123916	42550	E2f1
GO:0009098	leucine biosynthetic process	0.349805	-1.05038	1	1	0.00123916	32297	CG1673
GO:0046676	negative regulation of insulin secretion	0.349805	-1.05038	1	1	0.00123916	42561	GABA-B-R2
GO:1901648	regulation of actomyosin contractile ring localization	0.349805	-1.05038	1	1	0.00123916	35950	Pkn
GO:0001580	detection of chemical stimulus involved in sensory perception of bitter taste	0.349805	-1.05038	1	1	0.00123916	31376	norpA
GO:0097118	neuroligin clustering involved in postsynaptic membrane assembly	0.349805	-1.05038	1	1	0.00123916	42646	Nrx-1
GO:0008210	estrogen metabolic process	0.349805	-1.05038	1	1	0.00123916	32789	scu
GO:0010286	heat acclimation	0.349805	-1.05038	1	1	0.00123916	34655	CG5446
GO:0051895	negative regulation of focal adhesion assembly	0.349805	-1.05038	1	1	0.00123916	43991	Pten
GO:0000423	mitophagy	0.349805	-1.05038	1	1	0.00123916	35246	ref(2)P
GO:0042754	negative regulation of circadian rhythm	0.349805	-1.05038	1	1	0.00123916	32378	Fbxl4
GO:0019563	glycerol catabolic process	0.349805	-1.05038	1	1	0.00123916	43582	Tpi
GO:0019400	alditol metabolic process	0.349805	-1.05038	1	1	0.00123916	43582	Tpi
GO:0052803	imidazole-containing compound metabolic process	0.349805	-1.05038	1	1	0.00123916	31863	t
GO:0034471	ncRNA 5'-end processing	0.349805	-1.05038	1	1	0.00123916	3772007	Rpp20
GO:0006982	response to lipid hydroperoxide	0.349805	-1.05038	1	1	0.00123916	38413	PHGPx
GO:0043102	amino acid salvage	0.349805	-1.05038	1	1	0.00123916	326189	Adi1
GO:0035350	FAD transmembrane transport	0.349805	-1.05038	1	1	0.00123916	35941	CG8026
GO:0048075	positive regulation of eye pigmentation	0.349805	-1.05038	1	1	0.00123916	31607	Pink1
GO:1990546	mitochondrial tricarboxylic acid transmembrane transport	0.349805	-1.05038	1	1	0.00123916	3772221	sea
GO:0004993	G protein-coupled serotonin receptor activity	0.349805	-1.05038	1	1	0.00123916	40575	5-HT2A
GO:0015889	cobalamin transport	0.349805	-1.05038	1	1	0.00123916	31380	CG3556
GO:0002184	cytoplasmic translational termination	0.349805	-1.05038	1	1	0.00123916	40240	eRF1
GO:0016039	absorption of UV light	0.349805	-1.05038	1	1	0.00123916	42398	Rh3
GO:0000291	nuclear-transcribed mRNA catabolic process, exonucleolytic	0.349805	-1.05038	1	1	0.00123916	39366	Pop2
GO:0014048	regulation of glutamate secretion	0.349805	-1.05038	1	1	0.00123916	36589	Ih
GO:0008517	folic acid transmembrane transporter activity	0.349805	-1.05038	1	1	0.00123916	35941	CG8026
GO:0036059	nephrocyte diaphragm assembly	0.349805	-1.05038	1	1	0.00123916	41062	pyd
GO:0090224	regulation of spindle organization	0.349805	-1.05038	1	1	0.00123916	31816	Moe
GO:0007008	outer mitochondrial membrane organization	0.349805	-1.05038	1	1	0.00123916	40189	Tom20
GO:0007509	mesoderm migration involved in gastrulation	0.349805	-1.05038	1	1	0.00123916	36295	jeb
GO:0051890	regulation of cardioblast differentiation	0.349805	-1.05038	1	1	0.00123916	38846	lqf
GO:0010412	mannan metabolic process	0.349805	-1.05038	1	1	0.00123916	40524	beta-Man
GO:0036490	regulation of translation in response to endoplasmic reticulum stress	0.349805	-1.05038	1	1	0.00123916	44226	Xbp1
GO:1903422	negative regulation of synaptic vesicle recycling	0.349805	-1.05038	1	1	0.00123916	35359	sky
GO:0016264	gap junction assembly	0.349805	-1.05038	1	1	0.00123916	33062	shakB
GO:1903862	positive regulation of oxidative phosphorylation	0.349805	-1.05038	1	1	0.00123916	33461	Pgk
GO:1905304	regulation of cardiac myofibril assembly	0.349805	-1.05038	1	1	0.00123916	39958	Nedd4
GO:0001192	maintenance of transcriptional fidelity during DNA-templated transcription elongation	0.349805	-1.05038	1	1	0.00123916	41741	RpII15
GO:0008519	ammonium transmembrane transporter activity	0.349805	-1.05038	1	1	0.00123916	38589	Rh50
GO:0031646	positive regulation of nervous system process	0.349805	-1.05038	1	1	0.00123916	31607	Pink1
GO:0004743	pyruvate kinase activity	0.349805	-1.05038	1	1	0.00123916	42620	PyK
GO:1903687	negative regulation of border follicle cell migration	0.349805	-1.05038	1	1	0.00123916	38059	Ptpmeg
GO:0009758	carbohydrate utilization	0.349805	-1.05038	1	1	0.00123916	39150	Ilp2
GO:0030297	transmembrane receptor protein tyrosine kinase activator activity	0.349805	-1.05038	1	1	0.00123916	36295	jeb
GO:0005986	sucrose biosynthetic process	0.349805	-1.05038	1	1	0.00123916	35265	fbp
GO:0033539	fatty acid beta-oxidation using acyl-CoA dehydrogenase	0.349805	-1.05038	1	1	0.00123916	36252	wal
GO:0015117	thiosulfate transmembrane transporter activity	0.349805	-1.05038	1	1	0.00123916	41640	Dic1
GO:0014821	phasic smooth muscle contraction	0.349805	-1.05038	1	1	0.00123916	44132	slmo
GO:0023041	neuronal signal transduction	0.349805	-1.05038	1	1	0.00123916	32119	bif
GO:1900102	negative regulation of endoplasmic reticulum unfolded protein response	0.349805	-1.05038	1	1	0.00123916	38936	BI-1
GO:0098725	symmetric cell division	0.349805	-1.05038	1	1	0.00123916	33156	l(2)gl
GO:0051892	negative regulation of cardioblast differentiation	0.349805	-1.05038	1	1	0.00123916	38846	lqf
GO:0009882	blue light photoreceptor activity	0.349805	-1.05038	1	1	0.00123916	42305	cry
GO:1900744	regulation of p38MAPK cascade	0.349805	-1.05038	1	1	0.00123916	43481	alph
GO:0042167	heme catabolic process	0.349805	-1.05038	1	1	0.00123916	41407	Ho
GO:0004550	nucleoside diphosphate kinase activity	0.349805	-1.05038	1	1	0.00123916	43739	awd
GO:0000002	mitochondrial genome maintenance	0.349805	-1.05038	1	1	0.00123916	43831	CG11077
GO:0060251	regulation of glial cell proliferation	0.349805	-1.05038	1	1	0.00123916	42504	slmb
GO:1901029	negative regulation of mitochondrial outer membrane permeabilization involved in apoptotic signaling pathway	0.349805	-1.05038	1	1	0.00123916	41450	Tango9
GO:0009951	polarity specification of dorsal/ventral axis	0.349805	-1.05038	1	1	0.00123916	36046	sel
GO:0055024	regulation of cardiac muscle tissue development	0.349805	-1.05038	1	1	0.00123916	39958	Nedd4
GO:0015767	lactose transport	0.349805	-1.05038	1	1	0.00123916	36248	Tret1-1
GO:0042985	negative regulation of amyloid precursor protein biosynthetic process	0.349805	-1.05038	1	1	0.00123916	33260	CG3662
GO:1903385	regulation of homophilic cell adhesion	0.349805	-1.05038	1	1	0.00123916	35259	Lar
GO:0044347	cell wall polysaccharide catabolic process	0.349805	-1.05038	1	1	0.00123916	40524	beta-Man
GO:0008209	androgen metabolic process	0.349805	-1.05038	1	1	0.00123916	32789	scu
GO:0019471	4-hydroxyproline metabolic process	0.349805	-1.05038	1	1	0.00123916	40633	Hph
GO:0071472	cellular response to salt stress	0.349805	-1.05038	1	1	0.00123916	37800	kcc
GO:0009644	response to high light intensity	0.349805	-1.05038	1	1	0.00123916	35620	Tsp42Ej
GO:0006967	positive regulation of antifungal peptide biosynthetic process	0.349805	-1.05038	1	1	0.00123916	41087	Rel
GO:2001235	positive regulation of apoptotic signaling pathway	0.349805	-1.05038	1	1	0.00123916	42761	RpS3
GO:0030033	microvillus assembly	0.349805	-1.05038	1	1	0.00123916	31717	sn
GO:0036010	protein localization to endosome	0.349805	-1.05038	1	1	0.00123916	44448	scrib
GO:0032228	regulation of synaptic transmission, GABAergic	0.349805	-1.05038	1	1	0.00123916	32378	Fbxl4
GO:1903352	L-ornithine transmembrane transport	0.349805	-1.05038	1	1	0.00123916	31990	CG1628
GO:0031117	positive regulation of microtubule depolymerization	0.349805	-1.05038	1	1	0.00123916	36072	mlt
GO:0035185	preblastoderm mitotic cell cycle	0.349805	-1.05038	1	1	0.00123916	37415	Pu
GO:0035014	phosphatidylinositol 3-kinase regulator activity	0.349805	-1.05038	1	1	0.00123916	33203	Pi3K21B
GO:0048136	male germ-line cyst formation	0.349805	-1.05038	1	1	0.00123916	42819	eIF4G2
GO:0009133	nucleoside diphosphate biosynthetic process	0.349805	-1.05038	1	1	0.00123916	37834	Adk2
GO:2000435	negative regulation of protein neddylation	0.349805	-1.05038	1	1	0.00123916	50227	CG17059
GO:0060386	synapse assembly involved in innervation	0.349805	-1.05038	1	1	0.00123916	41225	Mical
GO:0006067	ethanol metabolic process	0.349805	-1.05038	1	1	0.00123916	3771877	Adh
GO:0015671	oxygen transport	0.349805	-1.05038	1	1	0.00123916	41930	glob1
GO:0070571	negative regulation of neuron projection regeneration	0.349805	-1.05038	1	1	0.00123916	43991	Pten
GO:0071326	cellular response to monosaccharide stimulus	0.349805	-1.05038	1	1	0.00123916	39150	Ilp2
GO:0098507	polynucleotide 5' dephosphorylation	0.349805	-1.05038	1	1	0.00123916	36253	CG13197
GO:1905616	regulation of miRNA mediated inhibition of translation	0.349805	-1.05038	1	1	0.00123916	34364	me31B
GO:0018160	peptidyl-pyrromethane cofactor linkage	0.349805	-1.05038	1	1	0.00123916	46140	l(3)02640
GO:0055025	positive regulation of cardiac muscle tissue development	0.349805	-1.05038	1	1	0.00123916	39958	Nedd4
GO:0046865	terpenoid transport	0.349805	-1.05038	1	1	0.00123916	42646	Nrx-1
GO:0006971	hypotonic response	0.349805	-1.05038	1	1	0.00123916	37800	kcc
GO:0035459	vesicle cargo loading	0.349805	-1.05038	1	1	0.00123916	31842	AP-1gamma
GO:0046355	mannan catabolic process	0.349805	-1.05038	1	1	0.00123916	40524	beta-Man
GO:0090138	regulation of actin cytoskeleton organization by cell-cell adhesion	0.349805	-1.05038	1	1	0.00123916	33619	ed
GO:0045428	regulation of nitric oxide biosynthetic process	0.349805	-1.05038	1	1	0.00123916	41087	Rel
GO:0018992	germ-line sex determination	0.349805	-1.05038	1	1	0.00123916	31442	snf
GO:0090069	regulation of ribosome biogenesis	0.349805	-1.05038	1	1	0.00123916	117332	Rheb
GO:0060048	cardiac muscle contraction	0.349805	-1.05038	1	1	0.00123916	32314	up
GO:0048308	organelle inheritance	0.349805	-1.05038	1	1	0.00123916	53567	larp
GO:0035234	ectopic germ cell programmed cell death	0.349805	-1.05038	1	1	0.00123916	31607	Pink1
GO:0030046	parallel actin filament bundle assembly	0.349805	-1.05038	1	1	0.00123916	31717	sn
GO:0045739	positive regulation of DNA repair	0.349805	-1.05038	1	1	0.00123916	42761	RpS3
GO:1900118	negative regulation of execution phase of apoptosis	0.349805	-1.05038	1	1	0.00123916	39753	Diap1
GO:0000036	acyl carrier activity	0.349805	-1.05038	1	1	0.00123916	38154	ND-ACP
GO:0046495	nicotinamide riboside metabolic process	0.349805	-1.05038	1	1	0.00123916	38411	CG12016
GO:0016108	tetraterpenoid metabolic process	0.349805	-1.05038	1	1	0.00123916	34024	santa-maria
GO:0015230	FAD transmembrane transporter activity	0.349805	-1.05038	1	1	0.00123916	35941	CG8026
GO:0098821	BMP receptor activity	0.349805	-1.05038	1	1	0.00123916	44096	wit
GO:0009997	negative regulation of cardioblast cell fate specification	0.349805	-1.05038	1	1	0.00123916	38846	lqf
GO:0097153	cysteine-type endopeptidase activity involved in apoptotic process	0.349805	-1.05038	1	1	0.00123916	31011	Dredd
GO:0042694	muscle cell fate specification	0.349805	-1.05038	1	1	0.00123916	36295	jeb
GO:2000727	positive regulation of cardiac muscle cell differentiation	0.349805	-1.05038	1	1	0.00123916	39958	Nedd4
GO:0015131	oxaloacetate transmembrane transporter activity	0.349805	-1.05038	1	1	0.00123916	41640	Dic1
GO:0032229	negative regulation of synaptic transmission, GABAergic	0.349805	-1.05038	1	1	0.00123916	32378	Fbxl4
GO:0051031	tRNA transport	0.349805	-1.05038	1	1	0.00123916	40189	Tom20
GO:0045760	positive regulation of action potential	0.349805	-1.05038	1	1	0.00123916	31607	Pink1
GO:0010891	negative regulation of sequestering of triglyceride	0.349805	-1.05038	1	1	0.00123916	39611	bmm
GO:0018063	cytochrome c-heme linkage	0.349805	-1.05038	1	1	0.00123916	42590	Cchl
GO:0070370	cellular heat acclimation	0.349805	-1.05038	1	1	0.00123916	34655	CG5446
GO:0071481	cellular response to X-ray	0.349805	-1.05038	1	1	0.00123916	42428	Stat92E
GO:1905898	positive regulation of response to endoplasmic reticulum stress	0.349805	-1.05038	1	1	0.00123916	44226	Xbp1
GO:0046166	glyceraldehyde-3-phosphate biosynthetic process	0.349805	-1.05038	1	1	0.00123916	43582	Tpi
GO:0003097	renal water transport	0.349805	-1.05038	1	1	0.00123916	41428	ClC-a
GO:0021952	central nervous system projection neuron axonogenesis	0.349805	-1.05038	1	1	0.00123916	33981	smt3
GO:0019511	peptidyl-proline hydroxylation	0.349805	-1.05038	1	1	0.00123916	40633	Hph
GO:0071265	L-methionine biosynthetic process	0.349805	-1.05038	1	1	0.00123916	326189	Adi1
GO:0051971	positive regulation of transmission of nerve impulse	0.349805	-1.05038	1	1	0.00123916	31607	Pink1
GO:0000394	RNA splicing, via endonucleolytic cleavage and ligation	0.349805	-1.05038	1	1	0.00123916	246551	CG30343
GO:0000001	mitochondrion inheritance	0.349805	-1.05038	1	1	0.00123916	53567	larp
GO:1902036	regulation of hematopoietic stem cell differentiation	0.349805	-1.05038	1	1	0.00123916	40506	Arf79F
GO:0048681	negative regulation of axon regeneration	0.349805	-1.05038	1	1	0.00123916	43991	Pten
GO:0098887	neurotransmitter receptor transport, endosome to postsynaptic membrane	0.349805	-1.05038	1	1	0.00123916	44448	scrib
GO:0009147	pyrimidine nucleoside triphosphate metabolic process	0.349805	-1.05038	1	1	0.00123916	43739	awd
GO:0015772	oligosaccharide transport	0.349805	-1.05038	1	1	0.00123916	36248	Tret1-1
GO:1904504	positive regulation of lipophagy	0.349805	-1.05038	1	1	0.00123916	43904	AMPKalpha
GO:1901224	positive regulation of NIK/NF-kappaB signaling	0.349805	-1.05038	1	1	0.00123916	41087	Rel
GO:0050980	detection of light stimulus involved in magnetoreception	0.349805	-1.05038	1	1	0.00123916	42305	cry
GO:0031365	N-terminal protein amino acid modification	0.349805	-1.05038	1	1	0.00123916	44724	san
GO:0045680	negative regulation of R8 cell differentiation	0.349805	-1.05038	1	1	0.00123916	33619	ed
GO:1903019	negative regulation of glycoprotein metabolic process	0.349805	-1.05038	1	1	0.00123916	33260	CG3662
GO:0060465	pharynx development	0.349805	-1.05038	1	1	0.00123916	42743	cnc
GO:0017006	protein-tetrapyrrole linkage	0.349805	-1.05038	1	1	0.00123916	42590	Cchl
GO:0009270	response to humidity	0.349805	-1.05038	1	1	0.00123916	40931	wtrw
GO:0015075	ion transmembrane transporter activity	0.349805	-1.05038	1	1	0.00123916	36003	trpl
GO:0021955	central nervous system neuron axonogenesis	0.349805	-1.05038	1	1	0.00123916	33981	smt3
GO:0051694	pointed-end actin filament capping	0.349805	-1.05038	1	1	0.00123916	43633	tmod
GO:0043095	regulation of GTP cyclohydrolase I activity	0.349805	-1.05038	1	1	0.00123916	37415	Pu
GO:0009209	pyrimidine ribonucleoside triphosphate biosynthetic process	0.349805	-1.05038	1	1	0.00123916	43739	awd
GO:0006283	transcription-coupled nucleotide-excision repair	0.349805	-1.05038	1	1	0.00123916	41741	RpII15
GO:0031118	rRNA pseudouridine synthesis	0.349805	-1.05038	1	1	0.00123916	36135	CG7637
GO:0097104	postsynaptic membrane assembly	0.349805	-1.05038	1	1	0.00123916	42646	Nrx-1
GO:0050678	regulation of epithelial cell proliferation	0.349805	-1.05038	1	1	0.00123916	44448	scrib
GO:0004860	protein kinase inhibitor activity	0.349805	-1.05038	1	1	0.00123916	33156	l(2)gl
GO:0090646	mitochondrial tRNA processing	0.349805	-1.05038	1	1	0.00123916	32789	scu
GO:0090109	regulation of cell-substrate junction assembly	0.349805	-1.05038	1	1	0.00123916	43991	Pten
GO:1990146	protein localization to rhabdomere	0.349805	-1.05038	1	1	0.00123916	34012	ninaC
GO:0006990	positive regulation of transcription from RNA polymerase II promoter involved in unfolded protein response	0.349805	-1.05038	1	1	0.00123916	44226	Xbp1
GO:0007542	primary sex determination, germ-line	0.349805	-1.05038	1	1	0.00123916	31442	snf
GO:0009180	purine ribonucleoside diphosphate biosynthetic process	0.349805	-1.05038	1	1	0.00123916	37834	Adk2
GO:0046459	short-chain fatty acid metabolic process	0.349805	-1.05038	1	1	0.00123916	42364	Arc42
GO:0006719	juvenile hormone catabolic process	0.349805	-1.05038	1	1	0.00123916	251984	Jheh1
GO:0006474	N-terminal protein amino acid acetylation	0.349805	-1.05038	1	1	0.00123916	44724	san
GO:0043173	nucleotide salvage	0.349805	-1.05038	1	1	0.00123916	32352	AMPdeam
GO:0004651	polynucleotide 5'-phosphatase activity	0.349805	-1.05038	1	1	0.00123916	36253	CG13197
GO:0006787	porphyrin-containing compound catabolic process	0.349805	-1.05038	1	1	0.00123916	41407	Ho
GO:1990120	messenger ribonucleoprotein complex assembly	0.349805	-1.05038	1	1	0.00123916	34364	me31B
GO:0022611	dormancy process	0.349805	-1.05038	1	1	0.00123916	45840	cpo
GO:0009637	response to blue light	0.349805	-1.05038	1	1	0.00123916	42305	cry
GO:0070874	negative regulation of glycogen metabolic process	0.349805	-1.05038	1	1	0.00123916	39150	Ilp2
GO:0035652	clathrin-coated vesicle cargo loading	0.349805	-1.05038	1	1	0.00123916	31842	AP-1gamma
GO:0042539	hypotonic salinity response	0.349805	-1.05038	1	1	0.00123916	37800	kcc
GO:0038060	nitric oxide-cGMP-mediated signaling pathway	0.349805	-1.05038	1	1	0.00123916	43541	Capa
GO:0014014	negative regulation of gliogenesis	0.349805	-1.05038	1	1	0.00123916	42504	slmb
GO:0050913	sensory perception of bitter taste	0.349805	-1.05038	1	1	0.00123916	31376	norpA
GO:0090160	Golgi to lysosome transport	0.349805	-1.05038	1	1	0.00123916	47091	comt
GO:0050680	negative regulation of epithelial cell proliferation	0.349805	-1.05038	1	1	0.00123916	44448	scrib
GO:0002789	negative regulation of antifungal peptide production	0.349805	-1.05038	1	1	0.00123916	34969	cact
GO:1903386	negative regulation of homophilic cell adhesion	0.349805	-1.05038	1	1	0.00123916	35259	Lar
GO:1900029	positive regulation of ruffle assembly	0.349805	-1.05038	1	1	0.00123916	31224	PsGEF
GO:0030845	phospholipase C-inhibiting G protein-coupled receptor signaling pathway	0.349805	-1.05038	1	1	0.00123916	36897	inaC
GO:0048240	sperm capacitation	0.349805	-1.05038	1	1	0.00123916	33532	Hydr2
GO:0043984	histone H4-K16 acetylation	0.349805	-1.05038	1	1	0.00123916	32318	tth
GO:0001953	negative regulation of cell-matrix adhesion	0.349805	-1.05038	1	1	0.00123916	43991	Pten
GO:0042759	long-chain fatty acid biosynthetic process	0.349805	-1.05038	1	1	0.00123916	39860	Baldspot
GO:0010644	cell communication by electrical coupling	0.349805	-1.05038	1	1	0.00123916	33062	shakB
GO:0090219	negative regulation of lipid kinase activity	0.349805	-1.05038	1	1	0.00123916	43991	Pten
GO:2000114	regulation of establishment of cell polarity	0.349805	-1.05038	1	1	0.00123916	42504	slmb
GO:0035092	sperm chromatin condensation	0.349805	-1.05038	1	1	0.00123916	37798	Nap1
GO:1990575	mitochondrial L-ornithine transmembrane transport	0.349805	-1.05038	1	1	0.00123916	31990	CG1628
GO:0006106	fumarate metabolic process	0.349805	-1.05038	1	1	0.00123916	42832	Gdh
GO:0033615	mitochondrial proton-transporting ATP synthase complex assembly	0.349805	-1.05038	1	1	0.00123916	42020	CG10340
GO:0019859	thymine metabolic process	0.349805	-1.05038	1	1	0.00123916	30995	CG17896
GO:1901028	regulation of mitochondrial outer membrane permeabilization involved in apoptotic signaling pathway	0.349805	-1.05038	1	1	0.00123916	41450	Tango9
GO:1901555	response to paclitaxel	0.349805	-1.05038	1	1	0.00123916	40627	rtp
GO:0042797	tRNA transcription by RNA polymerase III	0.349805	-1.05038	1	1	0.00123916	42942	Rpb10
GO:0032088	negative regulation of NF-kappaB transcription factor activity	0.349805	-1.05038	1	1	0.00123916	34969	cact
GO:1900027	regulation of ruffle assembly	0.349805	-1.05038	1	1	0.00123916	31224	PsGEF
GO:0045466	R7 cell differentiation	0.352133	-1.04375	22	9	0.0111524	4.60153e+44	tutl,bdl,Lar,boss,pros,mts,Ten-m,lola,csw
GO:1905952	regulation of lipid localization	0.352133	-1.04375	22	9	0.0111524	4.39914e+44	Pten,Itp-r83A,Arf79F,Npc1a,mdy,Indy,Rac2,CG5946,bmm
GO:0007446	imaginal disc growth	0.352411	-1.04296	6	3	0.00371747	450124118143862	Vha68-2,hyd,HnRNP-K
GO:0016125	sterol metabolic process	0.352411	-1.04296	6	3	0.00371747	343583278931581	Npc1a,scu,Marf
GO:0051153	regulation of striated muscle cell differentiation	0.352411	-1.04296	6	3	0.00371747	399583521536468	Nedd4,Pax,Mp20
GO:0033866	nucleoside bisphosphate biosynthetic process	0.352411	-1.04296	6	3	0.00371747	3.67603e+16	ATPCL,pdgy,CG17691
GO:0035265	organ growth	0.352411	-1.04296	6	3	0.00371747	438624118145012	HnRNP-K,hyd,Vha68-2
GO:0061723	glycophagy	0.352411	-1.04296	6	3	0.00371747	393833945441823	Atg12,Atg1,GlyS
GO:0044706	multi-multicellular organism process	0.352411	-1.04296	6	3	0.00371747	428323939235211	Gdh,Est-6,fon
GO:0031623	receptor internalization	0.352411	-1.04296	6	3	0.00371747	399583507838993	Nedd4,Arr1,Arr2
GO:0048070	regulation of developmental pigmentation	0.352411	-1.04296	6	3	0.00371747	316073874640694	Pink1,ple,Sec23
GO:1900150	regulation of defense response to fungus	0.352411	-1.04296	6	3	0.00371747	428213496941087	Pli,cact,Rel
GO:0004721	phosphoprotein phosphatase activity	0.352411	-1.04296	6	3	0.00371747	439913817740958	Pten,CG12091,puc
GO:0034033	purine nucleoside bisphosphate biosynthetic process	0.352411	-1.04296	6	3	0.00371747	3.35507e+16	CG17691,pdgy,ATPCL
GO:0045456	ecdysteroid biosynthetic process	0.352411	-1.04296	6	3	0.00371747	343583646731581	Npc1a,GstE14,Marf
GO:0048806	genitalia development	0.352411	-1.04296	6	3	0.00371747	409583341835505	puc,Rab5,scaf
GO:0048867	stem cell fate determination	0.352411	-1.04296	6	3	0.00371747	442054136337038	spen,pros,grh
GO:0033045	regulation of sister chromatid segregation	0.352411	-1.04296	6	3	0.00371747	495803181647877	Invadolysin,Moe,tws
GO:0045186	zonula adherens assembly	0.352411	-1.04296	6	3	0.00371747	444483841844861	scrib,kst,sdt
GO:0006360	transcription by RNA polymerase I	0.352411	-1.04296	6	3	0.00371747	361604041542942	Rpb5,Rpb8,Rpb10
GO:0001101	response to acid chemical	0.352411	-1.04296	6	3	0.00371747	357934019340931	RagC-D,CG14184,wtrw
GO:0006614	SRP-dependent cotranslational protein targeting to membrane	0.352411	-1.04296	6	3	0.00371747	339053881938883	Sec61alpha,Sec63,Srp9
GO:0007032	endosome organization	0.352411	-1.04296	6	3	0.00371747	434424501235246	Vha100-1,Vha68-2,ref(2)P
GO:0006497	protein lipidation	0.352411	-1.04296	6	3	0.00371747	393993938332909	app,Atg12,CG7990
GO:0000462	maturation of SSU-rRNA from tricistronic rRNA transcript (SSU-rRNA, 5.8S rRNA, LSU-rRNA)	0.352411	-1.04296	6	3	0.00371747	472184093243532	RpS14a,mRpS9,RpS8
GO:0007484	imaginal disc-derived genitalia development	0.352411	-1.04296	6	3	0.00371747	355054095833418	scaf,puc,Rab5
GO:0061951	establishment of protein localization to plasma membrane	0.352411	-1.04296	6	3	0.00371747	444484050647091	scrib,Arf79F,comt
GO:0014067	negative regulation of phosphatidylinositol 3-kinase signaling	0.352411	-1.04296	6	3	0.00371747	439913945440248	Pten,Atg1,Ide
GO:2001233	regulation of apoptotic signaling pathway	0.352411	-1.04296	6	3	0.00371747	414503657842761	Tango9,Opa1,RpS3
GO:0006613	cotranslational protein targeting to membrane	0.352411	-1.04296	6	3	0.00371747	388193888333905	Sec63,Srp9,Sec61alpha
GO:0120178	steroid hormone biosynthetic process	0.352411	-1.04296	6	3	0.00371747	343583158136467	Npc1a,Marf,GstE14
GO:0045476	nurse cell apoptotic process	0.352411	-1.04296	6	3	0.00371747	425504454839454	E2f1,lola,Atg1
GO:0051147	regulation of muscle cell differentiation	0.352411	-1.04296	6	3	0.00371747	364683521539958	Mp20,Pax,Nedd4
GO:2000116	regulation of cysteine-type endopeptidase activity	0.352411	-1.04296	6	3	0.00371747	421853101139753	Mdh2,Dredd,Diap1
GO:0042632	cholesterol homeostasis	0.352411	-1.04296	6	3	0.00371747	4019311733236460	CG14184,Rheb,GstE14
GO:0043524	negative regulation of neuron apoptotic process	0.352411	-1.04296	6	3	0.00371747	5.74054e+16	futsch,RpS3,Pink1
GO:0051865	protein autoubiquitination	0.352411	-1.04296	6	3	0.00371747	397533171338181	Diap1,Ubr3,CG12099
GO:0007485	imaginal disc-derived male genitalia development	0.352411	-1.04296	6	3	0.00371747	409583341835505	puc,Rab5,scaf
GO:0006260	DNA replication	0.352411	-1.04296	6	3	0.00371747	324583357142550	Top1,tim,E2f1
GO:0042158	lipoprotein biosynthetic process	0.352411	-1.04296	6	3	0.00371747	393993938332909	app,Atg12,CG7990
GO:0034030	ribonucleoside bisphosphate biosynthetic process	0.352411	-1.04296	6	3	0.00371747	3.24264e+16	pdgy,ATPCL,CG17691
GO:0006937	regulation of muscle contraction	0.352411	-1.04296	6	3	0.00371747	326823231436383	CG4928,up,Amph
GO:0090257	regulation of muscle system process	0.352411	-1.04296	6	3	0.00371747	326823638332314	CG4928,Amph,up
GO:0033047	regulation of mitotic sister chromatid segregation	0.352411	-1.04296	6	3	0.00371747	495804787731816	Invadolysin,tws,Moe
GO:0051983	regulation of chromosome segregation	0.352411	-1.04296	6	3	0.00371747	318164787749580	Moe,tws,Invadolysin
GO:0062013	positive regulation of small molecule metabolic process	0.352411	-1.04296	6	3	0.00371747	333864182339454	GlyP,GlyS,Atg1
GO:1902742	apoptotic process involved in development	0.352411	-1.04296	6	3	0.00371747	394544454842550	Atg1,lola,E2f1
GO:0044092	negative regulation of molecular function	0.356885	-1.03034	44	17	0.0210657	4.39913e+86	Pten,conu,Arr2,tim,alph,cact,Diap1,BI-1,Nedd4,Slob,ics,Mcr,14-3-3epsilon,l(2)gl,Spn88Ea,Arr1,Timp
GO:0044057	regulation of system process	0.356923	-1.03023	33	13	0.016109	3.16074e+64	Pink1,Amph,rut,Jra,eag,me31B,tim,CG4928,AMPKalpha,vri,up,Itp-r83A,Clk
GO:0007304	chorion-containing eggshell formation	0.356923	-1.03023	33	13	0.016109	3.39814e+64	smt3,slmb,puc,Jra,spir,RanBPM,cact,Rac2,E2f1,spoon,ed,gus,Pax
GO:1901605	alpha-amino acid metabolic process	0.356923	-1.03023	33	13	0.016109	3.09953e+65	CG17896,CG1673,CG5955,Gad1,ple,CG7430,TER94,CG15093,Got1,P5CDh1,Gdh,Adi1,Hph
GO:0060284	regulation of cell development	0.357906	-1.02748	136	50	0.0619579	45278,32083,33619,40506,43892,41363,39454,36915,40694,38831,43481,32400,34364,42854,41260,43904,35279,41432,117332,35259,37038,33156,36040,42550,38059,47877,43991,32743,40958,2768852,39958,39753,46015,43515,41360,31405,37557,31376,32586,45959,41225,45827,32009,33861,32119,42743,42504,38995,44039,44887	csw,dlg1,ed,Arf79F,sif,pros,Atg1,RhoGEF2,Sec23,Rac2,alph,NetB,me31B,Syx1A,Bruce,AMPKalpha,COX4,COX5A,Rheb,Lar,grh,l(2)gl,TER94,E2f1,Ptpmeg,tws,Pten,RhoGAPp190,puc,par-1,Nedd4,Diap1,tutl,CG7834,CG5214,ctp,babos,norpA,UQCR-14,mts,Mical,bic,Imp,Kr-h1,bif,cnc,slmb,h,Pak,mdy
GO:0070050	neuron cellular homeostasis	0.358609	-1.02552	14	6	0.00743494	4.70914e+29	comt,Ank2,Cbp53E,alc,Csp,bgm
GO:0042274	ribosomal small subunit biogenesis	0.358609	-1.02552	14	6	0.00743494	3.68515e+29	RpS15,RpS14a,RpS8,mRpS9,RpS7,mRpS7
GO:0045880	positive regulation of smoothened signaling pathway	0.358609	-1.02552	14	6	0.00743494	4.59593e+31	mts,Ubr3,CkIIalpha,Gprk1,Usp8,tws
GO:0051480	regulation of cytosolic calcium ion concentration	0.358609	-1.02552	14	6	0.00743494	3.13764e+29	norpA,Capa,Cbp53E,trpl,Itp-r83A,trp
GO:0003012	muscle system process	0.358609	-1.02552	14	6	0.00743494	4.18524e+29	Tm1,bt,up,Ca-alpha1D,slmo,Chd64
GO:0045727	positive regulation of translation	0.358609	-1.02552	14	6	0.00743494	3.91084e+30	RpS9,Hrb98DE,mxt,Rheb,CG4612,CG13124
GO:0048259	regulation of receptor-mediated endocytosis	0.358609	-1.02552	14	6	0.00743494	3.99584e+29	Nedd4,cindr,norpA,inaC,Pkc53E,BicD
GO:0051050	positive regulation of transport	0.363478	-1.01204	58	22	0.0272615	3.13764e+109	norpA,ClC-b,Nrx-1,sdt,Pkc53E,Rel,Itp-r83A,cindr,BicD,CaBP1,tim,Snx3,Tao,Arf79F,prtp,Moe,Nedd4,Sec61alpha,Sec23,drpr,olf186-F,inaC
GO:0055085	transmembrane transport	0.36708	-1.00218	187	68	0.0842627	36248,42291,36381,44702,43507,32992,33700,31674,32516,40931,35941,3772221,46415,45012,44965,36589,34500,43542,37294,37800,44046,41428,38589,31612,32428,44978,43442,33803,40129,42893,42920,37617,31950,33062,34117,43616,41967,40049,39670,41640,33636,39231,36826,42759,44307,36731,34686,42918,40189,39143,38819,42481,43707,36236,33354,40664,36003,43829,33695,31456,46069,31990,3355096,45668,38255,34950…	Tret1-1,ATPsynD,ClC-b,Vha36-1,ATPsyngamma,Pmp70,hoe2,CG9657,CG8206,wtrw,CG8026,sea,Fer1HCH,Vha68-2,Fer2LCH,Ih,porin,trp,CG10444,kcc,sun,ClC-a,Rh50,CG3168,eag,Tom40,Vha100-1,CG11147,Shal,CG6356,nAChRbeta2,blw,ATPsyndelta,shakB,SLC5A11,aralar1,CG6126,Indy,CG7272,Dic1,Atet,CG43693,Vha44,ATPsynCF6,Vha16-1,Vha14-1,MRP,nAChRalpha1,Tom20,ATPsynB,Sec63,Calx,CG1607,Drip,CG17646,Itp-r83A,trpl,ATPsynbeta,CG…
GO:0007548	sex differentiation	0.368374	-0.998655	25	10	0.0123916	3.68974e+49	inaC,scaf,puc,ct,hyd,raw,Rab5,Invadolysin,lola,Pdk1
GO:0002683	negative regulation of immune system process	0.368374	-0.998655	25	10	0.0123916	3.13323e+51	Rala,Usp2,Tim10,Spn88Ea,Prx5,Pli,GlyP,Jra,cact,Stat92E
GO:0008298	intracellular mRNA localization	0.368374	-0.998655	25	10	0.0123916	4.25043e+51	slmb,par-1,cnc,glo,CkIIalpha,spir,BicD,bic,spoon,Tm1
GO:0042752	regulation of circadian rhythm	0.369073	-0.996762	36	14	0.0173482	4.23053e+69	cry,Dh31,tim,norpA,bgm,Ih,Fbxl4,cue,Clk,ctrip,Pink1,homer,CrebB,CG5273
GO:0006820	anion transport	0.371666	-0.989759	61	23	0.0285006	3.14024e+118	CG3009,kcc,Indy,rdgB,aralar1,CG1607,Ndae1,sea,CG8026,porin,CG8177,MRP,CG6299,CG1628,CG30503,Pmp70,CG43693,CG30392,Dic1,ClC-b,Nrx-1,ClC-a,slmo
GO:0120035	regulation of plasma membrane bounded cell projection organization	0.371666	-0.989759	61	23	0.0285006	4.60153e+115	tutl,RhoGAPp190,Nedd4,PsGEF,babos,NetB,Sec23,RhoGEF2,Rac2,cpa,Pten,sif,pros,Rheb,Lar,Pak,me31B,AMPKalpha,Tm1,Kr-h1,bif,kra,Imp
GO:0031344	regulation of cell projection organization	0.371666	-0.989759	61	23	0.0285006	4.60153e+115	tutl,RhoGAPp190,Nedd4,PsGEF,NetB,babos,Sec23,RhoGEF2,Rac2,Pten,cpa,sif,pros,Rheb,Lar,Pak,me31B,AMPKalpha,Tm1,Kr-h1,bif,kra,Imp
GO:0048589	developmental growth	0.374786	-0.9814	89	33	0.0408922	3.24284e+167	eag,Jra,Timp,Lar,HnRNP-K,Spn88Ea,Rheb,hyd,Ten-m,Rab5,Nrx-1,Rac2,wit,RhoGEF2,poe,caz,Atg1,bdl,jeb,Rab10,dlg1,rut,Imp,Pdk1,scaf,par-1,CG15019,raw,Ank2,Vha68-2,FER,Ptpmeg,PNUTS
GO:0040007	growth	0.374786	-0.9814	89	33	0.0408922	3.55053e+167	scaf,par-1,CG15019,raw,Ank2,Vha68-2,FER,PNUTS,Ptpmeg,rut,Imp,Pdk1,Rac2,wit,poe,RhoGEF2,caz,Atg1,bdl,jeb,Rab10,dlg1,eag,Jra,Timp,HnRNP-K,Lar,Spn88Ea,Rheb,hyd,Ten-m,Nrx-1,Rab5
GO:0048813	dendrite morphogenesis	0.376225	-0.977568	50	19	0.023544	3.69633e+96	robl,smt3,wit,NetB,lola,pros,ct,Actbeta,CG6701,cnc,TER94,jim,AMPKalpha,chn,Rab5,Mical,futsch,Rel,Tm1
GO:0016331	morphogenesis of embryonic epithelium	0.379457	-0.969014	64	24	0.0297398	3.39054e+121	Sec61alpha,puc,alph,scaf,Rac2,RhoGEF2,Inx3,alpha-Cat,dlg1,ed,FER,Lac,raw,scrib,sinu,Jra,l(2)gl,Pak,Mcr,Rab5,btsz,pyd,Pkn,sdt
GO:0030111	regulation of Wnt signaling pathway	0.380188	-0.96709	39	15	0.0185874	4.42055e+74	spen,tws,Pp1alpha-96A,flw,hyd,Klp64D,crol,Dyrk2,mts,Cow,TER94,Usp8,slmb,Diap1,nmo
GO:0042058	regulation of epidermal growth factor receptor signaling pathway	0.380264	-0.966888	17	7	0.0086741	3.47183e+34	kek4,dlg1,scrib,Mkp3,ed,kek6,Ptpmeg
GO:0009612	response to mechanical stimulus	0.380264	-0.966888	17	7	0.0086741	4.60154e+34	tutl,GABA-B-R2,Tpi,Gad1,kcc,Jra,tko
GO:0006986	response to unfolded protein	0.380264	-0.966888	17	7	0.0086741	4.23584e+34	Ire1,Hsc70-5,Calr,Xbp1,BI-1,Cnx99A,Hsc70-4
GO:1901184	regulation of ERBB signaling pathway	0.380264	-0.966888	17	7	0.0086741	3.47184e+34	kek4,Ptpmeg,kek6,Mkp3,dlg1,ed,scrib
GO:0032868	response to insulin	0.380264	-0.966888	17	7	0.0086741	1.17332e+35	Rheb,Pdk1,Ilp6,Pi3K21B,Rab10,PyK,Ilp2
GO:0009615	response to virus	0.380264	-0.966888	17	7	0.0086741	4.98214e+34	EbpIII,Rel,Listericin,Npl4,TER94,Sec61alpha,B52
GO:0016051	carbohydrate biosynthetic process	0.380264	-0.966888	17	7	0.0086741	4.18234e+34	GlyS,Inos,Pgi,Pgk,fbp,CG13937,Tpi
GO:0034620	cellular response to unfolded protein	0.380264	-0.966888	17	7	0.0086741	3.65834e+34	Hsc70-5,Ire1,Hsc70-4,Calr,Cnx99A,BI-1,Xbp1
GO:0032869	cellular response to insulin stimulus	0.380264	-0.966888	17	7	0.0086741	3.91504e+35	Ilp2,PyK,Rab10,Pi3K21B,Rheb,Ilp6,Pdk1
GO:0050776	regulation of immune response	0.385011	-0.954483	53	20	0.0247831	4.98044e+101	Spn88Ea,Pli,Jra,Rala,crq,CYLD,Pitslre,Rel,smt3,puc,Prx5,GlyP,Rac2,cact,Stat92E,Dredd,Ide,Usp2,Pp1alpha-96A,Tim10
GO:2000241	regulation of reproductive process	0.385011	-0.954483	53	20	0.0247831	4.25504e+102	E2f1,Ptpmeg,dlg1,Ide,Diap1,Drip,Atg1,par-1,puc,CHOp24,Est-6,bic,Syx1A,Bruce,Adi1,slmb,cnc,p24-1,mdy,TER94
GO:0033043	regulation of organelle organization	0.385688	-0.952726	109	40	0.0495663	3.73873e+203	cpa,conu,tws,Pink1,Smg6,Nedd4,Marf,GABA-B-R2,14-3-3epsilon,tacc,SREBP,vig2,slmb,ctrip,CG11486,spir,Invadolysin,spoon,ed,crol,Cip4,Jupiter,Moe,flw,tmod,mamo,PsGEF,Tango9,Sec23,RhoGEF2,Stat92E,chinmo,hyd,Opa1,futsch,Smg5,CG8036,jim,Miro,mlt
GO:0043647	inositol phosphate metabolic process	0.390507	-0.94031	9	4	0.00495663	3.31374e+19	l(1)G0196,Ipp,Pten,norpA
GO:0007392	initiation of dorsal closure	0.390507	-0.94031	9	4	0.00495663	4.11184e+19	FER,raw,Rac2,scaf
GO:0009649	entrainment of circadian clock	0.390507	-0.94031	9	4	0.00495663	3.13763e+19	norpA,tim,cry,Clk
GO:1901570	fatty acid derivative biosynthetic process	0.390507	-0.94031	9	4	0.00495663	4.34204e+21	wat,CG1441,CG17691,pdgy
GO:1904263	positive regulation of TORC1 signaling	0.390507	-0.94031	9	4	0.00495663	1.17332e+20	Rheb,E2f1,RagC-D,CG14184
GO:0071456	cellular response to hypoxia	0.390507	-0.94031	9	4	0.00495663	4.49364e+19	Eip93F,Tom40,Hph,Vha68-1
GO:0006469	negative regulation of protein kinase activity	0.390507	-0.94031	9	4	0.00495663	3.31564e+19	l(2)gl,Pten,alph,ics
GO:0010669	epithelial structure maintenance	0.390507	-0.94031	9	4	0.00495663	3.94544e+19	Atg1,Mkp3,Csk,Lac
GO:0042026	protein refolding	0.390507	-0.94031	9	4	0.00495663	3.65834e+19	Hsc70-5,Hsc70-4,ninaA,CG7409
GO:0048872	homeostasis of number of cells	0.390507	-0.94031	9	4	0.00495663	3.84134e+19	PHGPx,cnc,Xbp1,Tao
GO:0036335	intestinal stem cell homeostasis	0.390507	-0.94031	9	4	0.00495663	3.29484e+19	Tao,Xbp1,cnc,PHGPx
GO:0042659	regulation of cell fate specification	0.390507	-0.94031	9	4	0.00495663	3.66783e+19	chn,ed,lqf,pros
GO:1904799	regulation of neuron remodeling	0.390507	-0.94031	9	4	0.00495663	4.05063e+19	Arf79F,ctp,Mical,slmb
GO:0014041	regulation of neuron maturation	0.390507	-0.94031	9	4	0.00495663	4.25044e+19	slmb,Mical,Arf79F,ctp
GO:0051348	negative regulation of transferase activity	0.390507	-0.94031	9	4	0.00495663	4.39914e+19	Pten,alph,l(2)gl,ics
GO:0033673	negative regulation of kinase activity	0.390507	-0.94031	9	4	0.00495663	3.47744e+19	ics,Pten,alph,l(2)gl
GO:0031396	regulation of protein ubiquitination	0.390507	-0.94031	9	4	0.00495663	4.11814e+19	hyd,Diap1,Nedd8,ctrip
GO:0098661	inorganic anion transmembrane transport	0.390507	-0.94031	9	4	0.00495663	4.16404e+19	Dic1,ClC-b,ClC-a,Ndae1
GO:0051170	import into nucleus	0.390507	-0.94031	9	4	0.00495663	4.05813e+19	Karybeta3,tim,chinmo,Ran
GO:0040040	thermosensory behavior	0.390507	-0.94031	9	4	0.00495663	3.14594e+19	spoon,Ptpmeg,ple,CrebB
GO:1900426	positive regulation of defense response to bacterium	0.390507	-0.94031	9	4	0.00495663	3.10114e+19	Dredd,GILT1,Listericin,Rel
GO:0080134	regulation of response to stress	0.392447	-0.935355	98	36	0.0446097	4.07394e+181	Rm62,Pli,RpS3,Pkn,Imp,ics,Rala,GlyP,Listericin,TM9SF4,cact,Csp,puc,Prx5,Pten,cpa,Pp1alpha-96A,raw,grh,Spn88Ea,Rel,Opa1,CYLD,me31B,alph,Cbp53E,Stat92E,GILT1,Rac2,BI-1,Xbp1,flw,Usp2,Tim10,Dredd,Ide
GO:0006396	RNA processing	0.393547	-0.932556	84	31	0.0384139	3.27893e+159	scu,snf,HnRNP-K,B52,Caper,Rpp20,CG11486,Rox8,Acn,RpS7,CG7564,Rm62,RpS14a,Hsc70-4,Dbp45A,RpL10Ab,l(1)10Bb,CG4364,Imp,Ire1,RpL7A,CG7637,CG17454,RpL35,caz,hrg,CG30343,CG42724,mRpS9,CG7971,RpS8
GO:0055088	lipid homeostasis	0.395255	-0.928225	31	12	0.0148699	3.43804e+60	CYLD,GstE14,boss,cue,SREBP,Ilp2,Itp-r83A,Pten,CG14184,bmm,smt3,Rheb
GO:0098742	cell-cell adhesion via plasma-membrane adhesion molecules	0.397969	-0.92138	20	8	0.00991326	3.36353e+40	bdl,Bsg,tutl,ed,Cont,chp,Lac,CG13506
GO:0007450	dorsal/ventral pattern formation, imaginal disc	0.397969	-0.92138	20	8	0.00991326	4.59594e+39	mts,14-3-3epsilon,nmo,CG1943,gammaSnap1,Cow,drpr,AnxB9
GO:0006402	mRNA catabolic process	0.397969	-0.92138	20	8	0.00991326	4.23584e+39	Ire1,cu,Not3,Pop2,CG11486,Smg6,Not11,Smg5
GO:0016333	morphogenesis of follicular epithelium	0.397969	-0.92138	20	8	0.00991326	4.25044e+39	slmb,scrib,l(2)gl,awd,spoon,dlg1,csw,Cip4
GO:0045454	cell redox homeostasis	0.397969	-0.92138	20	8	0.00991326	3.99884e+41	CG7430,CG3719,CaBP1,Trx-2,Prx5,CG6523,prtp,Prx3
GO:0048190	wing disc dorsal/ventral pattern formation	0.397969	-0.92138	20	8	0.00991326	3.78424e+39	gammaSnap1,AnxB9,drpr,Cow,nmo,CG1943,mts,14-3-3epsilon
GO:0051130	positive regulation of cellular component organization	0.397987	-0.921336	101	37	0.0458488	3.88634e+185	Ank2,drpr,inaC,Marf,Nedd4,Pink1,Imp,kra,sdt,norpA,Pak,spir,CG11486,Synd,sif,Arf79F,Moe,Jupiter,dlg1,Tao,Invadolysin,wit,Stat92E,Sec23,caz,PsGEF,Pkc53E,Opa1,AMPKalpha,chinmo,Nrx-1,mlt,BicD,cindr,Lar,nmo,Rheb
GO:0042440	pigment metabolic process	0.399925	-0.916479	45	17	0.0210657	4.39384e+84	cl,rdhB,PAPLA1,l(3)02640,Cnx99A,pr,santa-maria,se,Pten,pinta,Pu,Hexo1,alpha-Man-IIb,CG5037,ninaA,Ho,Rac2
GO:0043604	amide biosynthetic process	0.405934	-0.901565	121	44	0.0545229	31228,33703,36851,43573,33654,47218,44150,43594,42761,32953,34309,33686,43532,41347,38794,42470,39108,42464,36576,35453,34412,41372,40060,31483,34363,50364,40240,31009,39338,34420,43723,3355069,41343,59151,45329,50139,42819,37415,31613,40932,31398,32426,36760,31588	tko,mRpL24,RpS15,RpL32,RpL27A,RpS14a,RpS15Aa,RpS7,RpS3,RpS10b,RpS2,mxt,RpS8,RpL3,RpL18,RpS30,RpS9,RpS20,RpS23,RpL21,mRpS7,RpL24-like,RpL26,RpL35,eEF1delta,CG13364,eRF1,RpL36,RpL10Ab,RpS27A,RpL6,CG17691,RpS25,mRpL36,RpL12,CG12848,eIF4G2,Pu,RpL17,mRpS9,mRpL30,pdgy,ATPCL,RpL7A
GO:0030703	eggshell formation	0.40664	-0.899826	34	13	0.016109	3.49694e+64	cact,Rac2,Jra,spir,RanBPM,puc,smt3,slmb,Pax,gus,ed,E2f1,spoon
GO:0022411	cellular component disassembly	0.40664	-0.899826	34	13	0.016109	4.34423e+64	Vha100-1,Pink1,CG5676,TER94,ref(2)P,Vamp7,comt,Atg12,Mical,flw,Pp1alpha-96A,Hsc70-5,eRF1
GO:0051726	regulation of cell cycle	0.408581	-0.895064	62	23	0.0285006	3.59504e+114	Pkn,14-3-3epsilon,Bruce,l(2)gl,CkIIalpha,Jra,TER94,scrib,CG6191,cindr,COX5A,slmb,B52,tws,Pten,flw,Moe,tim,crol,Invadolysin,E2f1,Ran,puc
GO:0007155	cell adhesion	0.408581	-0.895064	62	23	0.0285006	4.40395e+115	Pak,sinu,RanBPM,scrib,Timp,Bsg,CG5758,CG17739,chp,pyd,Cont,parvin,Mkp3,tutl,bdl,CG13506,Pax,Lac,dlg1,ed,alpha-Cat,crol,Invadolysin
GO:0048284	organelle fusion	0.412918	-0.884507	23	9	0.0111524	3.60403e+44	TER94,Marf,comt,Vamp7,Syx6,Rab5,tacc,Syx1A,Opa1
GO:0007520	myoblast fusion	0.412918	-0.884507	23	9	0.0111524	3.32624e+44	dock,PyK,Pgk,Tpi,Rac2,Mp20,Pglym78,Gapdh1,Pfk
GO:0031647	regulation of protein stability	0.412918	-0.884507	23	9	0.0111524	3.25165e+44	CG8206,CkIIalpha,Nedd8,Snx3,Cnx99A,tws,DnaJ-1,Mlf,Pten
GO:0022416	chaeta development	0.412918	-0.884507	23	9	0.0111524	3.37594e+44	vri,Ten-m,Fkbp14,sn,spen,pyd,Diap1,ctp,CkIIalpha
GO:0006949	syncytium formation	0.412918	-0.884507	23	9	0.0111524	4.26203e+44	PyK,dock,Tpi,Pgk,Pglym78,Mp20,Rac2,Gapdh1,Pfk
GO:1903429	regulation of cell maturation	0.412918	-0.884507	23	9	0.0111524	3.14054e+46	ctp,TER94,cnc,par-1,slmb,Arf79F,Syx1A,bic,Mical
GO:0140253	cell-cell fusion	0.412918	-0.884507	23	9	0.0111524	3.57284e+44	Gapdh1,Pfk,Pglym78,Rac2,Mp20,Tpi,Pgk,PyK,dock
GO:0008544	epidermis development	0.412918	-0.884507	23	9	0.0111524	4.09583e+46	puc,par-1,scrib,app,l(2)gl,vri,sn,spen,Cip4
GO:0000768	syncytium formation by plasma membrane fusion	0.412918	-0.884507	23	9	0.0111524	4.34474e+44	Pglym78,Mp20,Rac2,Pfk,Gapdh1,PyK,dock,Tpi,Pgk
GO:0042044	fluid transport	0.41599	-0.877094	12	5	0.00619579	3.62363e+24	Drip,Ca-alpha1D,ClC-a,Capa,wat
GO:0008286	insulin receptor signaling pathway	0.41599	-0.877094	12	5	0.00619579	3.91503e+25	Ilp2,Pi3K21B,Rheb,Ilp6,Pdk1
GO:0051783	regulation of nuclear division	0.41599	-0.877094	12	5	0.00619579	4.21865e+24	14-3-3epsilon,Invadolysin,slmb,tws,Moe
GO:0009826	unidimensional cell growth	0.41599	-0.877094	12	5	0.00619579	3.88314e+24	Rac2,raw,scaf,RhoGEF2,FER
GO:0051302	regulation of cell division	0.41599	-0.877094	12	5	0.00619579	4.42894e+24	flw,Pkn,cindr,chinmo,Bruce
GO:0060180	female mating behavior	0.41599	-0.877094	12	5	0.00619579	3.69454e+24	mbl,Ilp2,Est-6,CG10433,sra
GO:0035069	larval midgut histolysis	0.41599	-0.877094	12	5	0.00619579	4.39914e+24	Pten,TER94,Atg12,Mdh2,Atg1
GO:0007088	regulation of mitotic nuclear division	0.41599	-0.877094	12	5	0.00619579	4.95804e+24	Invadolysin,slmb,14-3-3epsilon,Moe,tws
GO:0010453	regulation of cell fate commitment	0.41599	-0.877094	12	5	0.00619579	3.36194e+24	ed,chn,pros,alph,lqf
GO:0050767	regulation of neurogenesis	0.422045	-0.862643	99	36	0.0446097	3.27434e+180	RhoGAPp190,Nedd4,tutl,CG7834,ctp,CG5214,babos,tws,Pten,slmb,h,Pak,UQCR-14,mts,Mical,Imp,Kr-h1,bif,RhoGEF2,Sec23,Rac2,alph,NetB,ed,csw,Arf79F,pros,sif,COX5A,Rheb,Lar,l(2)gl,grh,me31B,AMPKalpha,COX4
GO:0046552	photoreceptor cell fate commitment	0.425846	-0.853678	26	10	0.0123916	4.59593e+49	mts,Rala,csw,lola,boss,Ire1,pros,scrib,Jra,grh
GO:0043269	regulation of ion transport	0.425846	-0.853678	26	10	0.0123916	3.99583e+49	Nedd4,Sec61alpha,NKAIN,olf186-F,homer,CG4928,Slob,Cnx99A,Ih,Usp2
GO:0033500	carbohydrate homeostasis	0.425846	-0.853678	26	10	0.0123916	4.35824e+49	Tpi,Pgi,Gapdh2,Ilp2,PyK,boss,Pfk,Eno,ATPCL,Galt
GO:0009950	dorsal/ventral axis specification	0.425846	-0.853678	26	10	0.0123916	3.60463e+49	sel,spoon,milt,csw,flw,glo,cnc,CkIIalpha,cact,BicD
GO:0016053	organic acid biosynthetic process	0.42648	-0.852189	40	15	0.0185874	3.67604e+76	ATPCL,Got1,Hydr2,Baldspot,CG1673,CG3961,Gad1,Adi1,CG31523,SREBP,Pu,ACC,ND-ACP,CG5326,bgm
GO:0046394	carboxylic acid biosynthetic process	0.42648	-0.852189	40	15	0.0185874	3.57614e+76	ACC,Pu,SREBP,CG31523,Adi1,bgm,CG5326,ND-ACP,Got1,ATPCL,Gad1,CG1673,CG3961,Baldspot,Hydr2
GO:0045451	pole plasm oskar mRNA localization	0.435007	-0.832392	15	6	0.00743494	4.18525e+31	Tm1,spir,slmb,par-1,cnc,glo
GO:0016334	establishment or maintenance of polarity of follicular epithelium	0.435007	-0.832392	15	6	0.00743494	3.31563e+29	l(2)gl,spoon,awd,dlg1,scrib,csw
GO:0000956	nuclear-transcribed mRNA catabolic process	0.435007	-0.832392	15	6	0.00743494	4.13394e+29	cu,Not3,Pop2,CG11486,Smg6,Smg5
GO:0035303	regulation of dephosphorylation	0.436692	-0.828528	4	2	0.00247831	478772768940	tws,Pp2A-29B
GO:0071230	cellular response to amino acid stimulus	0.436692	-0.828528	4	2	0.00247831	4019335793	CG14184,RagC-D
GO:0002701	negative regulation of production of molecular mediator of immune response	0.436692	-0.828528	4	2	0.00247831	3496933132	cact,Usp2
GO:0010950	positive regulation of endopeptidase activity	0.436692	-0.828528	4	2	0.00247831	4218531011	Mdh2,Dredd
GO:0018208	peptidyl-proline modification	0.436692	-0.828528	4	2	0.00247831	3327140633	ninaA,Hph
GO:0060142	regulation of syncytium formation by plasma membrane fusion	0.436692	-0.828528	4	2	0.00247831	3646835215	Mp20,Pax
GO:0051785	positive regulation of nuclear division	0.436692	-0.828528	4	2	0.00247831	4958031816	Invadolysin,Moe
GO:0046838	phosphorylated carbohydrate dephosphorylation	0.436692	-0.828528	4	2	0.00247831	4170143991	Ipp,Pten
GO:0032958	inositol phosphate biosynthetic process	0.436692	-0.828528	4	2	0.00247831	3137633137	norpA,l(1)G0196
GO:1900180	regulation of protein localization to nucleus	0.436692	-0.828528	4	2	0.00247831	4136333571	pros,tim
GO:0000266	mitochondrial fission	0.436692	-0.828528	4	2	0.00247831	3657831607	Opa1,Pink1
GO:0019934	cGMP-mediated signaling	0.436692	-0.828528	4	2	0.00247831	3604143541	Pka-R2,Capa
GO:0034755	iron ion transmembrane transport	0.436692	-0.828528	4	2	0.00247831	4641544965	Fer1HCH,Fer2LCH
GO:0035082	axoneme assembly	0.436692	-0.828528	4	2	0.00247831	3861140904	Klp64D,alphaTub84D
GO:0010965	regulation of mitotic sister chromatid separation	0.436692	-0.828528	4	2	0.00247831	4787749580	tws,Invadolysin
GO:0006620	posttranslational protein targeting to endoplasmic reticulum membrane	0.436692	-0.828528	4	2	0.00247831	3390538819	Sec61alpha,Sec63
GO:2001234	negative regulation of apoptotic signaling pathway	0.436692	-0.828528	4	2	0.00247831	3657841450	Opa1,Tango9
GO:0042744	hydrogen peroxide catabolic process	0.436692	-0.828528	4	2	0.00247831	421093771951	Prx3,Prx5
GO:0010025	wax biosynthetic process	0.436692	-0.828528	4	2	0.00247831	4342036029	wat,CG1441
GO:0043001	Golgi to plasma membrane protein transport	0.436692	-0.828528	4	2	0.00247831	4050647091	Arf79F,comt
GO:0007288	sperm axoneme assembly	0.436692	-0.828528	4	2	0.00247831	4090438611	alphaTub84D,Klp64D
GO:0007053	spindle assembly involved in male meiosis	0.436692	-0.828528	4	2	0.00247831	5356742467	larp,Synd
GO:0031589	cell-substrate adhesion	0.436692	-0.828528	4	2	0.00247831	3299035215	parvin,Pax
GO:0031112	positive regulation of microtubule polymerization or depolymerization	0.436692	-0.828528	4	2	0.00247831	4139236072	Jupiter,mlt
GO:0052652	cyclic purine nucleotide metabolic process	0.436692	-0.828528	4	2	0.00247831	4349332406	Gycalpha99B,rut
GO:0000096	sulfur amino acid metabolic process	0.436692	-0.828528	4	2	0.00247831	39675326189	Eip71CD,Adi1
GO:0016242	negative regulation of macroautophagy	0.436692	-0.828528	4	2	0.00247831	41260117332	Bruce,Rheb
GO:0007415	defasciculation of motor neuron axon	0.436692	-0.828528	4	2	0.00247831	3274342944	RhoGAPp190,tok
GO:0035090	maintenance of apical/basal cell polarity	0.436692	-0.828528	4	2	0.00247831	4300335931	veli,alc
GO:0006783	heme biosynthetic process	0.436692	-0.828528	4	2	0.00247831	3439446140	CG5037,l(3)02640
GO:0005319	lipid transporter activity	0.436692	-0.828528	4	2	0.00247831	3435841921	Npc1a,cv-d
GO:0060571	morphogenesis of an epithelial fold	0.436692	-0.828528	4	2	0.00247831	3691544540	RhoGEF2,ct
GO:0007634	optokinetic behavior	0.436692	-0.828528	4	2	0.00247831	3658943806	Ih,Ekar
GO:0048935	peripheral nervous system neuron development	0.436692	-0.828528	4	2	0.00247831	4108731011	Rel,Dredd
GO:0010810	regulation of cell-substrate adhesion	0.436692	-0.828528	4	2	0.00247831	3674043991	Zasp52,Pten
GO:0071545	inositol phosphate catabolic process	0.436692	-0.828528	4	2	0.00247831	4399141701	Pten,Ipp
GO:0046855	inositol phosphate dephosphorylation	0.436692	-0.828528	4	2	0.00247831	4399141701	Pten,Ipp
GO:0035072	ecdysone-mediated induction of salivary gland cell autophagic cell death	0.436692	-0.828528	4	2	0.00247831	3315644039	l(2)gl,Pak
GO:2000274	regulation of epithelial cell migration, open tracheal system	0.436692	-0.828528	4	2	0.00247831	3874637415	ple,Pu
GO:0043666	regulation of phosphoprotein phosphatase activity	0.436692	-0.828528	4	2	0.00247831	478772768940	tws,Pp2A-29B
GO:0017001	antibiotic catabolic process	0.436692	-0.828528	4	2	0.00247831	421093771951	Prx3,Prx5
GO:0006779	porphyrin-containing compound biosynthetic process	0.436692	-0.828528	4	2	0.00247831	3439446140	CG5037,l(3)02640
GO:0051984	positive regulation of chromosome segregation	0.436692	-0.828528	4	2	0.00247831	4958031816	Invadolysin,Moe
GO:0043649	dicarboxylic acid catabolic process	0.436692	-0.828528	4	2	0.00247831	4283238484	Gdh,Gad1
GO:1905818	regulation of chromosome separation	0.436692	-0.828528	4	2	0.00247831	4958047877	Invadolysin,tws
GO:0035186	syncytial blastoderm mitotic cell cycle	0.436692	-0.828528	4	2	0.00247831	5356733981	larp,smt3
GO:0090140	regulation of mitochondrial fission	0.436692	-0.828528	4	2	0.00247831	3160731581	Pink1,Marf
GO:0019320	hexose catabolic process	0.436692	-0.828528	4	2	0.00247831	3393536060	Galt,Pfk
GO:0061355	Wnt protein secretion	0.436692	-0.828528	4	2	0.00247831	3214031382	p24-1,CHOp24
GO:0035418	protein localization to synapse	0.436692	-0.828528	4	2	0.00247831	4444832083	scrib,dlg1
GO:0009190	cyclic nucleotide biosynthetic process	0.436692	-0.828528	4	2	0.00247831	4349332406	Gycalpha99B,rut
GO:0010771	negative regulation of cell morphogenesis involved in differentiation	0.436692	-0.828528	4	2	0.00247831	3211941363	bif,pros
GO:0016251	RNA polymerase II general transcription initiation factor activity	0.436692	-0.828528	4	2	0.00247831	3177342822	Trf2,TfIIA-S
GO:0035216	haltere disc development	0.436692	-0.828528	4	2	0.00247831	4173742854	trx,Syx1A
GO:0033014	tetrapyrrole biosynthetic process	0.436692	-0.828528	4	2	0.00247831	3439446140	CG5037,l(3)02640
GO:0048138	germ-line cyst encapsulation	0.436692	-0.828528	4	2	0.00247831	4250438534	slmb,Cip4
GO:0032496	response to lipopolysaccharide	0.436692	-0.828528	4	2	0.00247831	3605742428	Jra,Stat92E
GO:0010830	regulation of myotube differentiation	0.436692	-0.828528	4	2	0.00247831	3521536468	Pax,Mp20
GO:0043200	response to amino acid	0.436692	-0.828528	4	2	0.00247831	3579340193	RagC-D,CG14184
GO:0051643	endoplasmic reticulum localization	0.436692	-0.828528	4	2	0.00247831	31884142929	Bsg,Esyt2
GO:0010166	wax metabolic process	0.436692	-0.828528	4	2	0.00247831	4342036029	wat,CG1441
GO:0046365	monosaccharide catabolic process	0.436692	-0.828528	4	2	0.00247831	3393536060	Galt,Pfk
GO:0048036	central complex development	0.436692	-0.828528	4	2	0.00247831	3805932948	Ptpmeg,Tao
GO:0010921	regulation of phosphatase activity	0.436692	-0.828528	4	2	0.00247831	276894047877	Pp2A-29B,tws
GO:0035081	induction of programmed cell death by hormones	0.436692	-0.828528	4	2	0.00247831	3315644039	l(2)gl,Pak
GO:0006121	mitochondrial electron transport, succinate to ubiquinone	0.436692	-0.828528	4	2	0.00247831	4280835590	SdhD,SdhB
GO:0035304	regulation of protein dephosphorylation	0.436692	-0.828528	4	2	0.00247831	478772768940	tws,Pp2A-29B
GO:0042743	hydrogen peroxide metabolic process	0.436692	-0.828528	4	2	0.00247831	377195142109	Prx5,Prx3
GO:0060232	delamination	0.436692	-0.828528	4	2	0.00247831	412482768852	Timp,par-1
GO:0071229	cellular response to acid chemical	0.436692	-0.828528	4	2	0.00247831	3579340193	RagC-D,CG14184
GO:0034059	response to anoxia	0.436692	-0.828528	4	2	0.00247831	3600343542	trpl,trp
GO:0097090	presynaptic membrane organization	0.436692	-0.828528	4	2	0.00247831	4046442646	Ten-m,Nrx-1
GO:0045840	positive regulation of mitotic nuclear division	0.436692	-0.828528	4	2	0.00247831	4958031816	Invadolysin,Moe
GO:1901739	regulation of myoblast fusion	0.436692	-0.828528	4	2	0.00247831	3646835215	Mp20,Pax
GO:1904262	negative regulation of TORC1 signaling	0.436692	-0.828528	4	2	0.00247831	4399143904	Pten,AMPKalpha
GO:0008063	Toll signaling pathway	0.436692	-0.828528	4	2	0.00247831	3496942821	cact,Pli
GO:0022409	positive regulation of cell-cell adhesion	0.436692	-0.828528	4	2	0.00247831	4069440464	Sec23,Ten-m
GO:0012502	induction of programmed cell death	0.436692	-0.828528	4	2	0.00247831	4403933156	Pak,l(2)gl
GO:0050792	regulation of viral process	0.436692	-0.828528	4	2	0.00247831	3390536040	Sec61alpha,TER94
GO:0002028	regulation of sodium ion transport	0.436692	-0.828528	4	2	0.00247831	3797939958	NKAIN,Nedd4
GO:0007312	oocyte nucleus migration involved in oocyte dorsal/ventral axis specification	0.436692	-0.828528	4	2	0.00247831	3505144289	BicD,flw
GO:0007482	haltere development	0.436692	-0.828528	4	2	0.00247831	4285441737	Syx1A,trx
GO:0034453	microtubule anchoring	0.436692	-0.828528	4	2	0.00247831	3140531816	ctp,Moe
GO:0008062	eclosion rhythm	0.436692	-0.828528	4	2	0.00247831	3357138872	tim,Clk
GO:0048934	peripheral nervous system neuron differentiation	0.436692	-0.828528	4	2	0.00247831	3101141087	Dredd,Rel
GO:0071632	optomotor response	0.436692	-0.828528	4	2	0.00247831	4380636589	Ekar,Ih
GO:0046058	cAMP metabolic process	0.436692	-0.828528	4	2	0.00247831	3510732406	Pde11,rut
GO:0007562	eclosion	0.436692	-0.828528	4	2	0.00247831	3887233571	Clk,tim
GO:1903900	regulation of viral life cycle	0.436692	-0.828528	4	2	0.00247831	3604033905	TER94,Sec61alpha
GO:0046008	regulation of female receptivity, post-mating	0.436692	-0.828528	4	2	0.00247831	4738439392	sra,Est-6
GO:0006964	positive regulation of biosynthetic process of antibacterial peptides active against Gram-negative bacteria	0.436692	-0.828528	4	2	0.00247831	3101141087	Dredd,Rel
GO:0007280	pole cell migration	0.436692	-0.828528	4	2	0.00247831	3547842186	gus,14-3-3epsilon
GO:0062033	positive regulation of mitotic sister chromatid segregation	0.436692	-0.828528	4	2	0.00247831	3181649580	Moe,Invadolysin
GO:0035078	induction of programmed cell death by ecdysone	0.436692	-0.828528	4	2	0.00247831	3315644039	l(2)gl,Pak
GO:0051205	protein insertion into membrane	0.436692	-0.828528	4	2	0.00247831	437988437478	CG34132,Tim10
GO:0010889	regulation of sequestering of triglyceride	0.436692	-0.828528	4	2	0.00247831	4004939611	Indy,bmm
GO:0035220	wing disc development	0.437197	-0.827372	142	51	0.063197	33619,41551,34592,33759,38534,44540,44289,31382,36915,37929,42428,37842,38746,33418,31717,44205,41181,41921,41248,44448,36513,49804,38890,39733,44548,37823,37449,35215,37387,40081,2768852,40844,39958,31405,42733,35505,32990,38218,42492,42509,42186,45959,34774,36571,35478,35950,41062,35483,42944,39399,36648	ed,Snx3,crol,vri,Cip4,ct,flw,CHOp24,RhoGEF2,pio,Stat92E,gammaSnap1,ple,Rab5,sn,spen,hyd,cv-d,Timp,scrib,CG6191,Spn88Ea,nmo,Pka-C3,lola,Phm,Fkbp14,Pax,cpa,Mkp3,par-1,CG1943,Nedd4,ctp,Cow,scaf,parvin,drpr,AnxB9,Usp8,14-3-3epsilon,mts,ics,cg,gus,Pkn,pyd,Nipped-A,tok,app,hui
GO:0014070	response to organic cyclic compound	0.437236	-0.827282	29	11	0.0136307	3.17734e+54	Trf2,Clk,Kr-h1,Tao,l(2)gl,Pak,Pka-R2,Cyp6w1,Jra,Nurf-38,Hydr2
GO:0006650	glycerophospholipid metabolic process	0.437236	-0.827282	29	11	0.0136307	3.29094e+54	CG7990,Ipp,rdgB,Pi3K21B,CG7149,CG14945,CG3530,Taz,CG2201,Pten,norpA
GO:0006869	lipid transport	0.437236	-0.827282	29	11	0.0136307	4.41323e+56	slmo,Npc1a,Nrx-1,CG30392,cv-d,Pmp70,CG30503,CG6299,Esyt2,rdgB,CG3009
GO:0090304	nucleic acid metabolic process	0.440684	-0.819427	162	58	0.0718711	35917,41840,42267,39338,32069,41741,36387,44205,33989,31442,43862,34804,35173,37922,33759,39366,40415,32458,42822,40932,38206,37839,44226,31588,7354399,36160,32587,47218,35594,35483,34287,41339,35501,32009,42942,42358,32789,41670,3772007,42848,38369,43350,42761,37798,43594,39956,40739,40785,42550,33571,43532,38613,31773,36135,31483,42994,49636,246551	Dbp45A,Hsc70-4,Xrp1,RpL10Ab,l(1)10Bb,RpII15,spt4,spen,Caper,snf,HnRNP-K,Smg5,Acn,Nurf-38,vri,Pop2,Rpb8,Top1,TfIIA-S,mRpS9,CG7971,Not11,Xbp1,RpL7A,CG17454,Rpb5,caz,RpS14a,koi,Nipped-A,CG4364,cu,Not3,Imp,Rpb10,Ire1,scu,B52,Rpp20,Rox8,CG11486,mino,RpS3,Nap1,RpS7,CG7564,Rm62,CG42724,E2f1,tim,RpS8,Uev1A,Trf2,CG7637,RpL35,Smg6,hrg,CG30343
GO:0006412	translation	0.441959	-0.816538	111	40	0.0495663	5.01394e+199	CG12848,eIF4G2,RpL17,mRpS9,mRpL30,RpL7A,RpL10Ab,RpS27A,eRF1,RpL36,RpL12,RpL6,RpS25,mRpL36,RpS9,RpS30,RpS23,RpS20,RpL21,RpS8,RpL3,RpL18,RpL35,eEF1delta,CG13364,RpL26,RpL24-like,mRpS7,RpS15,RpL32,RpL27A,RpS14a,tko,mRpL24,RpS10b,RpS3,RpS2,mxt,RpS15Aa,RpS7
GO:0001751	compound eye photoreceptor cell differentiation	0.445818	-0.807845	63	23	0.0285006	3.68483e+115	Syn2,tau,tutl,bdl,lola,csw,Cpn,jeb,pros,Pten,Moe,scrib,Lar,mbl,Amph,grh,Jra,Ten-m,mts,Rala,Ire1,boss,chp
GO:0022610	biological adhesion	0.445818	-0.807845	63	23	0.0285006	4.00815e+115	Mkp3,tutl,bdl,parvin,dlg1,ed,crol,alpha-Cat,Invadolysin,CG13506,Lac,Pax,Timp,scrib,Bsg,CG5758,CG17739,Pak,sinu,RanBPM,Cont,chp,pyd
GO:0008088	axo-dendritic transport	0.450156	-0.798161	18	7	0.0086741	4.56834e+36	milt,Mob4,Atg1,Klp64D,Marf,Miro,futsch
GO:1901653	cellular response to peptide	0.450156	-0.798161	18	7	0.0086741	3.91504e+35	Ilp2,PyK,Pi3K21B,Rab10,Rheb,Ilp6,Pdk1
GO:0043434	response to peptide hormone	0.450156	-0.798161	18	7	0.0086741	3.12204e+35	Ilp6,Pdk1,Rheb,Ilp2,Pi3K21B,PyK,Rab10
GO:0071375	cellular response to peptide hormone stimulus	0.450156	-0.798161	18	7	0.0086741	3.30254e+35	Rab10,PyK,Pi3K21B,Ilp2,Pdk1,Ilp6,Rheb
GO:0002784	regulation of antimicrobial peptide production	0.450156	-0.798161	18	7	0.0086741	3.31324e+34	Usp2,Rel,Pitslre,cact,Dredd,smt3,Pli
GO:1901652	response to peptide	0.450156	-0.798161	18	7	0.0086741	3.91504e+35	Ilp2,PyK,Rab10,Pi3K21B,Ilp6,Pdk1,Rheb
GO:0019722	calcium-mediated signaling	0.450156	-0.798161	18	7	0.0086741	4.78783e+34	Eip63F-1,Ca-alpha1D,TpnC25D,norpA,inaC,TpnC41C,trpl
GO:0098609	cell-cell adhesion	0.456636	-0.783868	35	13	0.016109	3.61025e+65	RanBPM,tutl,Bsg,bdl,Mkp3,scrib,pyd,CG13506,Lac,chp,Cont,ed,dlg1
GO:0006468	protein phosphorylation	0.457559	-0.781849	86	31	0.0384139	3.35501e+158	Gprk1,inaC,Csk,wit,Rac2,puc,Pink1,par-1,Atg1,FER,Tao,ninaC,Ptpmeg,Pdk,Jra,CkIIalpha,Pak,Pka-C3,nmo,CG11486,Pitslre,Pkn,CG31145,Ire1,Pkc53E,bt,awd,Slob,Dyrk2,Pdk1,AMPKalpha
GO:0060810	intracellular mRNA localization involved in pattern specification process	0.462755	-0.770558	21	8	0.00991326	4.84485e+41	CkIIalpha,spir,slmb,cnc,par-1,glo,Tm1,bic
GO:0036293	response to decreased oxygen levels	0.462755	-0.770558	21	8	0.00991326	4.06333e+39	Hph,tko,Vha68-1,Eip93F,Tom40,trp,h,trpl
GO:0035967	cellular response to topologically incorrect protein	0.462755	-0.770558	21	8	0.00991326	4.42264e+39	Xbp1,BI-1,Ire1,Hsc70-5,Calr,Cnx99A,Hsc70-4,CG3061
GO:1902850	microtubule cytoskeleton organization involved in mitosis	0.462755	-0.770558	21	8	0.00991326	4.05893e+39	tacc,dlg1,Ran,Invadolysin,Mob4,smt3,l(2)gl,ctp
GO:0035966	response to topologically incorrect protein	0.462755	-0.770558	21	8	0.00991326	4.46434e+39	Cnx99A,Calr,CG3061,Hsc70-4,Ire1,Hsc70-5,Xbp1,BI-1
GO:0032990	cell part morphogenesis	0.464407	-0.766994	163	58	0.0718711	41737,31816,44540,38611,36550,41363,33262,36295,33635,33981,326116,36963,32400,44096,38831,33418,31717,41840,43904,40464,36578,41852,41087,44205,36583,5740544,35259,36040,43924,36041,38059,44548,43826,42496,41118,37556,38863,38542,46015,39958,31581,40699,41225,40553,42186,39826,36678,42944,32119,40680,42358,35576,318841,42743,42587,48448,32406,44039	trx,Moe,ct,Klp64D,CG6701,pros,dock,jeb,bdl,smt3,tau,robl,NetB,wit,Rac2,Rab5,sn,Hsc70-4,AMPKalpha,Ten-m,Opa1,Tm1,Rel,spen,Hsc70-5,futsch,Lar,TER94,jim,Pka-R2,Ptpmeg,lola,Actbeta,RhoGAP93B,FER,CG13506,Ank2,CG15019,tutl,Nedd4,Marf,Xe7,Mical,Cont,14-3-3epsilon,fax,chn,tok,bif,kra,Ire1,Mob4,Bsg,cnc,Mitofilin,CkIIalpha,rut,Pak
GO:0010876	lipid localization	0.465058	-0.765594	38	14	0.0173482	3.76175e+71	blw,Invadolysin,Npc1a,Nrx-1,slmo,AMPKalpha,cv-d,CG30392,Esyt2,CG30503,CG6299,Pmp70,CG3009,rdgB
GO:1905879	regulation of oogenesis	0.465058	-0.765594	38	14	0.0173482	4.25505e+71	E2f1,bic,Ptpmeg,Bruce,Syx1A,dlg1,Diap1,slmb,cnc,puc,par-1,Atg1,TER94,mdy
GO:0072375	medium-term memory	0.467318	-0.760745	7	3	0.00371747	324063281731607	rut,CrebB,Pink1
GO:0031122	cytoplasmic microtubule organization	0.467318	-0.760745	7	3	0.00371747	404643516931816	Ten-m,hook,Moe
GO:0099173	postsynapse organization	0.467318	-0.760745	7	3	0.00371747	404644264633981	Ten-m,Nrx-1,smt3
GO:0070868	heterochromatin organization involved in chromatin silencing	0.467318	-0.760745	7	3	0.00371747	418403144234592	Hsc70-4,snf,crol
GO:0031114	regulation of microtubule depolymerization	0.467318	-0.760745	7	3	0.00371747	3.60726e+16	mlt,futsch,tacc
GO:0014042	positive regulation of neuron maturation	0.467318	-0.760745	7	3	0.00371747	425043140540506	slmb,ctp,Arf79F
GO:0009187	cyclic nucleotide metabolic process	0.467318	-0.760745	7	3	0.00371747	434933510732406	Gycalpha99B,Pde11,rut
GO:1904801	positive regulation of neuron remodeling	0.467318	-0.760745	7	3	0.00371747	425044050631405	slmb,Arf79F,ctp
GO:0042220	response to cocaine	0.467318	-0.760745	7	3	0.00371747	388723604132948	Clk,Pka-R2,Tao
GO:0008020	G protein-coupled photoreceptor activity	0.467318	-0.760745	7	3	0.00371747	398874230542398	Rh4,cry,Rh3
GO:0046839	phospholipid dephosphorylation	0.467318	-0.760745	7	3	0.00371747	377074399140468	CG3530,Pten,laza
GO:0045448	mitotic cell cycle, embryonic	0.467318	-0.760745	7	3	0.00371747	339813741553567	smt3,Pu,larp
GO:0009648	photoperiodism	0.467318	-0.760745	7	3	0.00371747	335713137642305	tim,norpA,cry
GO:0045751	negative regulation of Toll signaling pathway	0.467318	-0.760745	7	3	0.00371747	349694282149804	cact,Pli,Spn88Ea
GO:1901880	negative regulation of protein depolymerization	0.467318	-0.760745	7	3	0.00371747	405893738743633	tacc,cpa,tmod
GO:0035212	cell competition in a multicellular organism	0.467318	-0.760745	7	3	0.00371747	439913315638218	Pten,l(2)gl,drpr
GO:0004713	protein tyrosine kinase activity	0.467318	-0.760745	7	3	0.00371747	411184139834012	FER,Csk,ninaC
GO:0043271	negative regulation of ion transport	0.467318	-0.760745	7	3	0.00371747	331323995834038	Usp2,Nedd4,Slob
GO:0043279	response to alkaloid	0.467318	-0.760745	7	3	0.00371747	329483887236041	Tao,Clk,Pka-R2
GO:0019646	aerobic electron transport chain	0.467318	-0.760745	7	3	0.00371747	460404143235279	cype,COX5A,COX4
GO:0043242	negative regulation of protein complex disassembly	0.467318	-0.760745	7	3	0.00371747	405894363337387	tacc,tmod,cpa
GO:0055092	sterol homeostasis	0.467318	-0.760745	7	3	0.00371747	4019311733236460	CG14184,Rheb,GstE14
GO:0006694	steroid biosynthetic process	0.467318	-0.760745	7	3	0.00371747	315813646734358	Marf,GstE14,Npc1a
GO:0044772	mitotic cell cycle phase transition	0.467318	-0.760745	7	3	0.00371747	4787711733242550	tws,Rheb,E2f1
GO:0006123	mitochondrial electron transport, cytochrome c to oxygen	0.467318	-0.760745	7	3	0.00371747	460403527941432	cype,COX4,COX5A
GO:0030490	maturation of SSU-rRNA	0.467318	-0.760745	7	3	0.00371747	409324353247218	mRpS9,RpS8,RpS14a
GO:0045752	positive regulation of Toll signaling pathway	0.467318	-0.760745	7	3	0.00371747	339814282140292	smt3,Pli,Pitslre
GO:0072527	pyrimidine-containing compound metabolic process	0.467318	-0.760745	7	3	0.00371747	393963099543739	Adk1,CG17896,awd
GO:0042181	ketone biosynthetic process	0.467318	-0.760745	7	3	0.00371747	343583158136467	Npc1a,Marf,GstE14
GO:0044719	regulation of imaginal disc-derived wing size	0.467318	-0.760745	7	3	0.00371747	365133782344548	CG6191,Phm,lola
GO:0046661	male sex differentiation	0.467318	-0.760745	7	3	0.00371747	334184095835505	Rab5,puc,scaf
GO:0043043	peptide biosynthetic process	0.470303	-0.754378	112	40	0.0495663	4.72183e+199	RpS14a,RpL27A,RpL32,RpS15,mRpL24,tko,mxt,RpS2,RpS3,RpS10b,RpS7,RpS15Aa,RpL21,RpS23,RpS20,RpS30,RpS9,RpL18,RpL3,RpS8,eEF1delta,CG13364,RpL35,RpL24-like,RpL26,mRpS7,RpS27A,RpL10Ab,eRF1,RpL36,RpL12,mRpL36,RpS25,RpL6,mRpS9,mRpL30,RpL17,eIF4G2,CG12848,RpL7A
GO:0009967	positive regulation of signal transduction	0.472286	-0.75017	132	47	0.0582404	36183,42509,42733,39753,31713,44046,42093,43826,47877,42922,42550,37449,48448,35576,42761,42821,35793,38846,41062,32009,45959,34831,38017,42186,31224,3355013,37040,36915,41398,44226,33981,40193,38611,34416,44289,36295,42665,32948,33619,34732,117332,43501,40292,41087,41181,41921,44205	Listericin,Usp8,Cow,Diap1,Ubr3,sun,Sur-8,Actbeta,tws,Pp1alpha-96A,E2f1,Fkbp14,CkIIalpha,Mob4,RpS3,Pli,RagC-D,lqf,pyd,Imp,mts,Dyrk2,Pdk1,14-3-3epsilon,PsGEF,Gprk1,olf186-F,RhoGEF2,Csk,Xbp1,smt3,CG14184,Klp64D,Cnot4,flw,jeb,Efa6,Tao,ed,CG44085,Rheb,Kul,Pitslre,Rel,hyd,cv-d,spen
GO:0007030	Golgi organization	0.473557	-0.747482	24	9	0.0111524	3.21403e+45	p24-1,CHOp24,Tango5,TER94,comt,Sec23,COX4,CG5510,Ire1
GO:0008284	positive regulation of cell population proliferation	0.473557	-0.747482	24	9	0.0111524	3.18164e+46	Moe,Ilp2,pros,conu,Idgf2,Tango9,Stat92E,CG17059,Nedd4
GO:0000209	protein polyubiquitination	0.483031	-0.727674	27	10	0.0123916	4.25044e+49	slmb,Diap1,Nedd4,Ubr3,Pli,hyd,Fbxl4,Ubc4,Uev1A,Bruce
GO:0048663	neuron fate commitment	0.483031	-0.727674	27	10	0.0123916	4.44484e+49	scrib,grh,Jra,csw,lola,Rala,mts,pros,boss,Ire1
GO:0001754	eye photoreceptor cell differentiation	0.483044	-0.727647	64	23	0.0285006	3.69454e+115	mbl,Lar,scrib,Jra,grh,Amph,Rala,mts,Ten-m,chp,boss,Ire1,bdl,tutl,tau,Syn2,csw,lola,Moe,Pten,pros,jeb,Cpn
GO:0007277	pole cell development	0.485731	-0.722101	10	4	0.00495663	3.43644e+19	me31B,tacc,TER94,RhoGEF2
GO:0006352	DNA-templated transcription, initiation	0.485731	-0.722101	10	4	0.00495663	3.17733e+19	Trf2,caz,RpII15,TfIIA-S
GO:0043112	receptor metabolic process	0.485731	-0.722101	10	4	0.00495663	3.89934e+19	Arr2,Arr1,Gad1,Nedd4
GO:0045938	positive regulation of circadian sleep/wake cycle, sleep	0.485731	-0.722101	10	4	0.00495663	3.81743e+19	cue,homer,bgm,Ih
GO:0000041	transition metal ion transport	0.485731	-0.722101	10	4	0.00495663	3.60035e+19	trpl,Fer1HCH,Fer2LCH,trp
GO:0044272	sulfur compound biosynthetic process	0.485731	-0.722101	10	4	0.00495663	3.26189e+22	Adi1,ATPCL,pdgy,CG17691
GO:0000132	establishment of mitotic spindle orientation	0.485731	-0.722101	10	4	0.00495663	3.14053e+19	ctp,l(2)gl,Ran,dlg1
GO:0032008	positive regulation of TOR signaling	0.485731	-0.722101	10	4	0.00495663	3.57934e+20	RagC-D,CG14184,E2f1,Rheb
GO:0042332	gravitaxis	0.485731	-0.722101	10	4	0.00495663	3.88904e+19	nmo,cry,dlg1,l(3)L1231
GO:0098930	axonal transport	0.485731	-0.722101	10	4	0.00495663	4.56834e+19	milt,Miro,Marf,Klp64D
GO:0006612	protein targeting to membrane	0.485731	-0.722101	10	4	0.00495663	3.88834e+19	Srp9,Sec63,app,Sec61alpha
GO:1901568	fatty acid derivative metabolic process	0.485731	-0.722101	10	4	0.00495663	3.24263e+21	pdgy,CG17691,wat,CG1441
GO:0009629	response to gravity	0.485731	-0.722101	10	4	0.00495663	4.17763e+19	l(3)L1231,dlg1,cry,nmo
GO:0000027	ribosomal large subunit assembly	0.485731	-0.722101	10	4	0.00495663	4.53294e+19	RpL12,RpL24-like,RpL3,RpL6
GO:0070633	transepithelial transport	0.485731	-0.722101	10	4	0.00495663	3.49504e+19	Ca-alpha1D,wat,Capa,ClC-a
GO:0042045	epithelial fluid transport	0.485731	-0.722101	10	4	0.00495663	3.49504e+19	Ca-alpha1D,wat,Capa,ClC-a
GO:0045924	regulation of female receptivity	0.485731	-0.722101	10	4	0.00495663	3.93924e+19	Est-6,CG10433,sra,mbl
GO:0031935	regulation of chromatin silencing	0.485731	-0.722101	10	4	0.00495663	4.39244e+19	jim,CG8036,vig2,crol
GO:0033365	protein localization to organelle	0.486742	-0.720022	47	17	0.0210657	3.3551e+88	Tim23,CG8206,Tom20,Tim9a,scrib,Tom40,Tim8,Sec61alpha,UQCR-C2,CG34132,UQCR-C1,Ran,tim,Karybeta3,Srp9,Sec63,Tim10
GO:0051961	negative regulation of nervous system development	0.486742	-0.720022	47	17	0.0210657	4.39914e+84	Pten,Cip4,pros,tws,ed,alph,CG7834,CG5214,bif,Kr-h1,mts,COX4,UQCR-14,l(2)gl,Mob4,slmb,COX5A
GO:0007293	germarium-derived egg chamber formation	0.491486	-0.710323	30	11	0.0136307	2.76885e+56	par-1,slmb,BicD,Csk,Stat92E,14-3-3epsilon,slmo,flw,cpa,Pdcd4,Cip4
GO:0007528	neuromuscular junction development	0.493051	-0.707143	50	18	0.0223048	3.20834e+93	dlg1,jeb,Ank2,par-1,Atg1,Nedd4,wit,caz,Pdk1,Ten-m,Nrx-1,futsch,Imp,Gad1,Lar,rut,CrebB,Jra
GO:0007309	oocyte axis specification	0.493051	-0.707143	50	18	0.0223048	4.25044e+91	slmb,scrib,cnc,CkIIalpha,spir,BicD,l(2)gl,milt,bic,14-3-3epsilon,gus,Tm1,par-1,glo,sel,dlg1,flw,Moe
GO:0009116	nucleoside metabolic process	0.499029	-0.695091	13	5	0.00619579	4.48614e+24	sdt,AdenoK,dlg1,CG12016,awd
GO:0010324	membrane invagination	0.499029	-0.695091	13	5	0.00619579	4.05064e+24	Arf79F,drpr,crq,Synd,csw
GO:0042059	negative regulation of epidermal growth factor receptor signaling pathway	0.499029	-0.695091	13	5	0.00619579	3.36194e+24	ed,Mkp3,Ptpmeg,kek6,kek4
GO:0008592	regulation of Toll signaling pathway	0.499029	-0.695091	13	5	0.00619579	3.49694e+24	cact,Pitslre,Pli,Spn88Ea,smt3
GO:0061726	mitochondrion disassembly	0.499029	-0.695091	13	5	0.00619579	3.65834e+24	Hsc70-5,ref(2)P,CG5676,Pink1,Atg12
GO:0016198	axon choice point recognition	0.499029	-0.695091	13	5	0.00619579	4.45484e+24	lola,Nedd4,tutl,kra,RhoGAP93B
GO:0046467	membrane lipid biosynthetic process	0.499029	-0.695091	13	5	0.00619579	3.29093e+25	CG7990,CG31523,GlcAT-S,Baldspot,CG5326
GO:0006749	glutathione metabolic process	0.499029	-0.695091	13	5	0.00619579	3.64674e+24	GstE14,GstO3,se,GstE6,GstD1
GO:0072329	monocarboxylic acid catabolic process	0.499029	-0.695091	13	5	0.00619579	3.62524e+24	wal,TER94,Hydr2,Arc42,CG14688
GO:1902904	negative regulation of supramolecular fiber organization	0.499029	-0.695091	13	5	0.00619579	3.14594e+24	spoon,tacc,tmod,cpa,Cip4
GO:0000422	autophagy of mitochondrion	0.499029	-0.695091	13	5	0.00619579	3.65834e+24	Hsc70-5,ref(2)P,CG5676,Pink1,Atg12
GO:0099024	plasma membrane invagination	0.499029	-0.695091	13	5	0.00619579	4.05064e+24	Arf79F,drpr,csw,Synd,crq
GO:1901657	glycosyl compound metabolic process	0.499029	-0.695091	13	5	0.00619579	4.37394e+24	awd,CG12016,dlg1,AdenoK,sdt
GO:0016199	axon midline choice point recognition	0.499029	-0.695091	13	5	0.00619579	4.60154e+24	tutl,lola,Nedd4,RhoGAP93B,kra
GO:0016246	RNA interference	0.499029	-0.695091	13	5	0.00619579	4.07394e+24	Rm62,CG10077,Smg6,Hsc70-4,Smg5
GO:0070646	protein modification by small protein removal	0.499029	-0.695091	13	5	0.00619579	3.63393e+24	Den1,Uch,Usp2,Usp8,CYLD
GO:0046627	negative regulation of insulin receptor signaling pathway	0.499029	-0.695091	13	5	0.00619579	4.25043e+26	slmb,Pp2A-29B,mts,dock,Pten
GO:1900077	negative regulation of cellular response to insulin stimulus	0.499029	-0.695091	13	5	0.00619579	4.39913e+26	Pten,dock,mts,slmb,Pp2A-29B
GO:1901185	negative regulation of ERBB signaling pathway	0.499029	-0.695091	13	5	0.00619579	3.36194e+24	ed,Mkp3,Ptpmeg,kek6,kek4
GO:0006259	DNA metabolic process	0.499133	-0.694882	33	12	0.0148699	4.25504e+59	E2f1,Xrp1,Top1,tim,RpII15,Nipped-A,koi,Uev1A,Smg5,RpS3,Smg6,Nap1
GO:0019725	cellular homeostasis	0.503059	-0.687049	96	34	0.0421314	4.41174e+171	bgm,Capa,Fkbp14,Cpn,Ank2,Prx3,Fer1HCH,Vha68-2,Fer2LCH,Csp,Prx5,Trx-2,CG7430,CG3719,trp,norpA,Pgk,up,CaBP1,CG8177,alc,prtp,Vha68-1,Ndae1,comt,Cbp53E,CG6523,Itp-r83A,Ilp2,Vha100-1,mbl,trpl,Miro,TER94
GO:0007391	dorsal closure	0.504628	-0.683933	56	20	0.0247831	4.09583e+99	puc,Sec61alpha,alph,Rac2,scaf,Inx3,dlg1,ed,alpha-Cat,FER,raw,scrib,sinu,Jra,Pak,l(2)gl,Mcr,Rab5,Pkn,pyd
GO:1904580	regulation of intracellular mRNA localization	0.509556	-0.674215	16	6	0.00743494	3.60403e+31	TER94,l(2)gl,bic,par-1,cnc,Syx1A
GO:0016476	regulation of embryonic cell shape	0.509556	-0.674215	16	6	0.00743494	4.11184e+29	FER,pyd,RhoGEF2,raw,Rac2,scaf
GO:0007316	pole plasm RNA localization	0.509556	-0.674215	16	6	0.00743494	4.18525e+31	Tm1,spir,cnc,par-1,glo,slmb
GO:0070507	regulation of microtubule cytoskeleton organization	0.509556	-0.674215	16	6	0.00743494	3.18164e+31	Moe,Jupiter,mlt,futsch,slmb,tacc
GO:0061572	actin filament bundle organization	0.509556	-0.674215	16	6	0.00743494	3.17173e+29	sn,ed,Tm1,FER,ctp,Rac2
GO:0052548	regulation of endopeptidase activity	0.509556	-0.674215	16	6	0.00743494	4.12484e+29	Timp,Mcr,Dredd,Mdh2,Diap1,Spn88Ea
GO:0019094	pole plasm mRNA localization	0.509556	-0.674215	16	6	0.00743494	4.18525e+31	Tm1,spir,cnc,par-1,glo,slmb
GO:0030198	extracellular matrix organization	0.509556	-0.674215	16	6	0.00743494	4.39913e+29	Pten,Rab10,CG5455,Sec23,CG5758,Timp
GO:0051017	actin filament bundle assembly	0.509556	-0.674215	16	6	0.00743494	4.18524e+29	Tm1,FER,Rac2,ctp,sn,ed
GO:0007606	sensory perception of chemical stimulus	0.512585	-0.668289	39	14	0.0173482	3.30404e+69	Obp19d,pros,Itp-r83A,Klp64D,norpA,Obp56g,Dyrk2,Arr2,rdgB,Obp57c,Obp44a,Cyp6w1,eag,Arr1
GO:0016049	cell growth	0.512585	-0.668289	39	14	0.0173482	4.11184e+69	FER,raw,Ank2,Ptpmeg,Rab5,eag,scaf,rut,Rac2,RhoGEF2,poe,bdl,Lar,CG15019
GO:0051248	negative regulation of protein metabolic process	0.512894	-0.667687	82	29	0.0359356	3.33433e+144	chinmo,me31B,mts,Mcr,ics,Rala,kra,Not3,hyd,ATPsynD,Timp,ctrip,Spn88Ea,CG3662,l(2)gl,CkIIalpha,CG13928,Pop2,raw,cpa,Pten,flw,Srp9,Mkp3,puc,Diap1,Not11,CG17059,alph
GO:0044242	cellular lipid catabolic process	0.518353	-0.657099	19	7	0.0086741	2.51984e+35	Jheh1,pdgy,wal,CG14688,Hydr2,bmm,Arc42
GO:0009108	coenzyme biosynthetic process	0.518353	-0.657099	19	7	0.0086741	3.74153e+36	Pu,CG17691,pdgy,ATPCL,CG12116,CG12016,pr
GO:0046488	phosphatidylinositol metabolic process	0.518353	-0.657099	19	7	0.0086741	4.39913e+34	Pten,Pi3K21B,CG7990,Ipp,CG3530,rdgB,norpA
GO:0048103	somatic stem cell division	0.518353	-0.657099	19	7	0.0086741	4.59595e+34	mts,tws,sdt,clu,Stat92E,pros,l(2)gl
GO:0051057	positive regulation of small GTPase mediated signal transduction	0.518353	-0.657099	19	7	0.0086741	3.55764e+34	Mob4,Efa6,smt3,14-3-3epsilon,Sur-8,PsGEF,RhoGEF2
GO:0002700	regulation of production of molecular mediator of immune response	0.518353	-0.657099	19	7	0.0086741	4.02924e+34	Pitslre,Rel,Usp2,cact,smt3,Dredd,Pli
GO:0018205	peptidyl-lysine modification	0.518353	-0.657099	19	7	0.0086741	4.47243e+34	san,tth,Nipped-A,trx,smt3,vig2,Act87E
GO:0060811	intracellular mRNA localization involved in anterior/posterior axis specification	0.518353	-0.657099	19	7	0.0086741	4.58274e+36	bic,slmb,cnc,par-1,glo,Tm1,spir
GO:0035317	imaginal disc-derived wing hair organization	0.518353	-0.657099	19	7	0.0086741	3.85344e+36	Cip4,spen,sn,app,scrib,par-1,vri
GO:0045879	negative regulation of smoothened signaling pathway	0.518353	-0.657099	19	7	0.0086741	4.01484e+36	Gbeta76C,Pp1alpha-96A,flw,Nedd4,slmb,Pp2A-29B,mts
GO:0035315	hair cell differentiation	0.518353	-0.657099	19	7	0.0086741	3.37594e+36	vri,scrib,par-1,sn,app,spen,Cip4
GO:0035316	non-sensory hair organization	0.518353	-0.657099	19	7	0.0086741	3.93993e+36	app,sn,vri,scrib,par-1,Cip4,spen
GO:0046579	positive regulation of Ras protein signal transduction	0.518353	-0.657099	19	7	0.0086741	3.39814e+34	smt3,Efa6,Mob4,14-3-3epsilon,PsGEF,Sur-8,RhoGEF2
GO:0001738	morphogenesis of a polarized epithelium	0.518589	-0.656643	42	15	0.0185874	3.60573e+78	Jra,l(2)gl,grh,app,nmo,puc,scrib,par-1,spen,sdt,Rala,btsz,ed,dlg1,lola
GO:0016071	mRNA metabolic process	0.52461	-0.645101	68	24	0.0297398	4.28484e+121	Rox8,CG11486,Smg5,snf,Caper,B52,Rm62,CG7564,Acn,l(1)10Bb,Hsc70-4,Ire1,Imp,RpII15,cu,Not3,Smg6,CG17454,Not11,hrg,caz,Pop2,CG42724,CG7971
GO:0034250	positive regulation of cellular amide metabolic process	0.525967	-0.642516	22	8	0.00991326	3.10114e+40	Dredd,RpS9,Rel,CG13124,CG4612,mxt,Rheb,Hrb98DE
GO:0018209	peptidyl-serine modification	0.525967	-0.642516	22	8	0.00991326	4.84484e+39	CkIIalpha,inaC,Pka-C3,Pkc53E,Pkn,Pdk1,awd,Dyrk2
GO:0043062	extracellular structure organization	0.525967	-0.642516	22	8	0.00991326	4.06944e+39	Sec23,cindr,Timp,CG5758,flw,CG5455,Rab10,Pten
GO:0006401	RNA catabolic process	0.525967	-0.642516	22	8	0.00991326	3.93664e+39	Pop2,Ire1,cu,Not3,CG11486,Smg6,Not11,Smg5
GO:0018105	peptidyl-serine phosphorylation	0.525967	-0.642516	22	8	0.00991326	4.37393e+39	awd,Dyrk2,Pdk1,Pkn,Pkc53E,Pka-C3,CkIIalpha,inaC
GO:0016236	macroautophagy	0.525967	-0.642516	22	8	0.00991326	3.93834e+39	Atg12,lqf,Vha100-1,Atg1,ref(2)P,TER94,GlyS,Vamp7
GO:0001505	regulation of neurotransmitter levels	0.529091	-0.636595	71	25	0.0309789	3.78424e+124	gammaSnap1,CG7430,comt,Esyt2,Scamp,Csp,stmA,Arf79F,Gdi,Ih,CanB,l(2)gl,BicD,Synd,Syngr,veli,Gad1,lqf,Rel,Syx6,Hsc70-4,GABA-B-R2,t,sky,Syx1A
GO:0006518	peptide metabolic process	0.531232	-0.632557	140	49	0.0607187	31483,34363,50364,34412,40060,41372,37823,32652,39108,42470,42464,36576,35453,43532,41347,38794,32953,42761,34309,33686,41503,44150,43594,36851,43573,37111,33654,47218,31228,33703,31588,38973,36467,50139,42819,31613,40932,31398,40815,38972,45329,43723,33005,41343,59151,39338,34420,40240,31009	RpL35,eEF1delta,CG13364,mRpS7,RpL26,RpL24-like,Phm,CG4678,RpS9,RpS30,RpS20,RpS23,RpL21,RpS8,RpL3,RpL18,RpS10b,RpS3,RpS2,mxt,GstD1,RpS15Aa,RpS7,RpS15,RpL32,GstE6,RpL27A,RpS14a,tko,mRpL24,RpL7A,se,GstE14,CG12848,eIF4G2,RpL17,mRpS9,mRpL30,twr,GstO3,RpL12,RpL6,Nep3,RpS25,mRpL36,RpL10Ab,RpS27A,eRF1,RpL36
GO:1903825	organic acid transmembrane transport	0.532723	-0.629754	25	9	0.0111524	4.16404e+46	Dic1,sea,CG43693,aralar1,CG1607,kcc,Indy,Pmp70,CG1628
GO:1905039	carboxylic acid transmembrane transport	0.532723	-0.629754	25	9	0.0111524	3.92314e+46	CG43693,Dic1,sea,CG1628,Pmp70,kcc,Indy,aralar1,CG1607
GO:0014902	myotube differentiation	0.532723	-0.629754	25	9	0.0111524	4.34474e+44	Pglym78,Rac2,Mp20,Pfk,Gapdh1,PyK,dock,Tpi,Pgk
GO:0071417	cellular response to organonitrogen compound	0.532723	-0.629754	25	9	0.0111524	3.32031e+45	Pi3K21B,Rheb,CG14184,RagC-D,Rab10,PyK,Ilp2,Pdk1,Ilp6
GO:1901699	cellular response to nitrogen compound	0.532723	-0.629754	25	9	0.0111524	3.32031e+45	Pi3K21B,Rheb,CG14184,RagC-D,Rab10,PyK,Ilp2,Pdk1,Ilp6
GO:0002066	columnar/cuboidal epithelial cell development	0.533371	-0.628539	97	34	0.0421314	3.15964e+171	pigs,slmb,spir,RanBPM,kst,Rala,kra,RN-tre,gus,puc,par-1,Diap1,cact,E2f1,Pax,Pten,scrib,cindr,veli,Lar,Jra,me31B,Rab5,Hsc70-4,smt3,Stat92E,Rac2,ed,dlg1,csw,Tao,spoon,Cip4,ct
GO:0030707	ovarian follicle cell development	0.533371	-0.628539	97	34	0.0421314	3.52154e+171	Pax,Pten,E2f1,cact,puc,par-1,Diap1,kra,gus,RN-tre,kst,Rala,spir,RanBPM,pigs,slmb,Cip4,ct,csw,ed,dlg1,Tao,spoon,Stat92E,Rac2,smt3,me31B,Hsc70-4,Rab5,Jra,scrib,cindr,veli,Lar
GO:0044089	positive regulation of cellular component biogenesis	0.534498	-0.626428	51	18	0.0223048	3.99584e+90	Nedd4,Stat92E,wit,PsGEF,caz,dlg1,Ank2,sif,Jupiter,CG11486,Rheb,nmo,Lar,Synd,Pak,spir,chinmo,kra
GO:0009953	dorsal/ventral pattern formation	0.534498	-0.626428	51	18	0.0223048	3.88904e+89	nmo,cnc,CkIIalpha,BicD,milt,mts,14-3-3epsilon,CG1943,glo,gammaSnap1,cact,Cow,drpr,AnxB9,sel,spoon,csw,flw
GO:0010927	cellular component assembly involved in morphogenesis	0.539244	-0.617586	54	19	0.023544	3.49694e+95	cact,Rac2,Zasp52,puc,Mlp60A,smt3,Pax,ed,E2f1,Prm,spoon,Jra,RanBPM,Bsg,slmb,bt,up,gus,Mical
GO:0051241	negative regulation of multicellular organismal process	0.541579	-0.613267	80	28	0.0346964	3.31564e+139	l(2)gl,COX5A,slmb,Mob4,scrib,Kr-h1,lqf,bif,Fbxl4,mts,COX4,norpA,chn,Bruce,UQCR-14,alph,CG7834,Csk,CG5214,Diap1,Cip4,Pten,tws,pros,Tao,Ptpmeg,ed,dlg1
GO:0002064	epithelial cell development	0.544314	-0.608229	106	37	0.0458488	3.43643e+186	me31B,Rab5,Hsc70-4,grh,Jra,cindr,scrib,Lar,veli,ct,Cip4,alpha-Cat,dlg1,csw,ed,spoon,Tao,Rac2,RhoGEF2,Stat92E,smt3,kra,RN-tre,gus,Rala,kst,RanBPM,spir,slmb,pigs,Pax,Pten,E2f1,cact,puc,par-1,Diap1
GO:0040003	chitin-based cuticle development	0.544413	-0.608048	31	11	0.0136307	4.09583e+54	puc,l(2)gl,grh,Cpr65Au,Cpr72Ec,Sec23,pio,Gasp,Pu,sdt,Cpr67B
GO:0007447	imaginal disc pattern formation	0.544413	-0.608048	31	11	0.0136307	3.78424e+54	gammaSnap1,Cow,AnxB9,drpr,nmo,CG1943,Nipped-A,tws,spen,mts,14-3-3epsilon
GO:0045088	regulation of innate immune response	0.544413	-0.608048	31	11	0.0136307	3.33865e+56	GlyP,Spn88Ea,Pli,Prx5,Rel,Tim10,Pp1alpha-96A,CYLD,Dredd,Rala,Ide
GO:0007018	microtubule-based movement	0.544413	-0.608048	31	11	0.0136307	3.15814e+56	Marf,Miro,ctp,Mob4,Atg1,Pink1,robl,Klp64D,cpa,futsch,milt
GO:0061024	membrane organization	0.545464	-0.606118	83	29	0.0359356	3.64054e+147	Taz,Opa1,CG30392,Rab5,Nrx-1,Syx6,crq,Hsc70-4,kst,Syx1A,Ten-m,Miro,TER94,grh,h,Vamp7,CG6299,Synd,Tom20,mino,Cip4,Tim10,Arf79F,csw,CG34132,Tango9,CG5903,drpr,comt
GO:0050801	ion homeostasis	0.54809	-0.601315	60	21	0.0260223	4.64154e+104	Fer1HCH,Fer2LCH,Vha68-2,Vha68-1,Cpn,unc80,shakB,Capa,CG8177,trp,Ho,Cbp53E,Ndae1,SREBP,MtnA,Itp-r83A,CG6523,up,norpA,trpl,Vha100-1
GO:0048598	embryonic morphogenesis	0.54923	-0.599239	86	30	0.0371747	4.09583e+151	puc,Sec61alpha,RhoGEF2,Rac2,scaf,alph,ed,dlg1,alpha-Cat,Inx3,jeb,raw,Lac,FER,ct,scrib,5-HT2A,Pak,gol,l(2)gl,Jra,sinu,wal,btsz,Rab5,chrb,Mcr,sdt,Pkn,pyd
GO:0098655	cation transmembrane transport	0.54923	-0.599239	86	30	0.0371747	4.22914e+149	ATPsynD,Itp-r83A,Rh50,Vha44,ATPsynCF6,Vha14-1,SK,nAChRalpha1,eag,Vha16-1,trpl,Vha36-1,ATPsyngamma,ATPsynbeta,ATPsynG,CG1628,ATPsynB,Vha100-1,Fer2LCH,Fer1HCH,Vha68-2,Vha68-1,Ca-alpha1D,ATPsyndelta,blw,Shal,trp,aralar1,sun,Ndae1
GO:0010817	regulation of hormone levels	0.549584	-0.598593	34	12	0.0148699	3.30054e+60	Nep3,Pdh,CG7675,CG9512,Marf,Est-6,scu,GstE14,Jheh1,Itp-r83A,Npc1a,GABA-B-R2
GO:0050684	regulation of mRNA processing	0.549584	-0.598593	34	12	0.0148699	3.69453e+61	mbl,Caper,snf,B52,HnRNP-K,Hrb98DE,Rox8,CG17454,qkr58E-2,Rm62,Dbp45A,Saf-B
GO:0042886	amide transport	0.553396	-0.591681	138	48	0.0594796	33046,246587,33418,40373,31842,42854,3346167,326232,3355096,32475,44448,32294,44978,3354919,32140,33025,38883,37478,40506,42525,44072,40581,37842,41450,4379884,47091,40694,33905,32470,31382,36554,45683,45827,32516,39399,40189,40633,38819,35941,34264,34012,33571,39846,41800,44360,32081,40958,38459	CG1695,CG30392,Rab5,Syx6,AP-1gamma,Syx1A,btsz,Tango5,Tim23,CG6299,scrib,Tim9a,Tom40,Dbp80,p24-1,Rab10,Srp9,Tim10,Arf79F,AP-2sigma,Ran,Karybeta3,gammaSnap1,Tango9,CG34132,comt,Sec23,Sec61alpha,Scamp,CHOp24,RN-tre,milt,bic,CG8206,app,Tom20,Hph,Sec63,CG8026,Gdi,ninaC,tim,UQCR-C2,UQCR-C1,Rab18,Tim8,puc,mge
GO:0007351	tripartite regional subdivision	0.554411	-0.589848	37	13	0.016109	3.31565e+66	l(2)gl,spir,glo,par-1,cnc,scrib,slmb,Moe,gus,Tm1,dlg1,csw,bic
GO:0000122	negative regulation of transcription by RNA polymerase II	0.554411	-0.589848	37	13	0.016109	4.13634e+64	pros,spt4,SREBP,Clk,ct,dlg1,tim,chn,vri,E2f1,h,Jra,scrib
GO:1902903	regulation of supramolecular fiber organization	0.554411	-0.589848	37	13	0.016109	3.85344e+68	Cip4,Jupiter,cpa,tmod,futsch,conu,spoon,tacc,chinmo,PsGEF,spir,mlt,Nedd4
GO:0008595	anterior/posterior axis specification, embryo	0.554411	-0.589848	37	13	0.016109	3.31565e+66	l(2)gl,spir,par-1,scrib,cnc,glo,slmb,gus,Tm1,Moe,dlg1,csw,bic
GO:0000578	embryonic axis specification	0.554411	-0.589848	37	13	0.016109	3.18164e+66	Moe,Tm1,gus,bic,dlg1,csw,spir,l(2)gl,slmb,glo,par-1,cnc,scrib
GO:0019932	second-messenger-mediated signaling	0.554411	-0.589848	37	13	0.016109	3.54734e+64	TpnC41C,Itp-r83A,Eip63F-1,Ca-alpha1D,Dh31,CG16721,Capa,norpA,inaC,trpl,rut,Pka-R2,TpnC25D
GO:0030855	epithelial cell differentiation	0.557694	-0.583945	118	41	0.0508055	3.65544e+206	RN-tre,gus,kra,Rala,kst,spir,RanBPM,slmb,app,pigs,Pten,Pax,E2f1,cact,Diap1,par-1,puc,spen,Hsc70-4,sn,Rab5,me31B,Jra,grh,Lar,veli,cindr,scrib,ct,Cip4,spoon,Tao,vri,alpha-Cat,ed,csw,dlg1,Rac2,Stat92E,RhoGEF2,smt3
GO:0042391	regulation of membrane potential	0.558949	-0.581697	40	14	0.0173482	3.14564e+71	SK,nAChRalpha1,eag,Pink1,Hsc70-5,Ekar,Moe,ATPsynD,Itp-r83A,inaF-B,nAChRbeta2,Slob,Ih,shakB
GO:0010647	positive regulation of cell communication	0.56236	-0.575614	147	51	0.063197	44226,33981,40193,31224,3355013,37040,41398,36915,32948,42665,33619,41551,38611,34416,44289,36295,117332,43501,34732,35051,41087,40664,41181,40292,41921,44205,39753,31713,31607,44046,36183,42509,42733,42550,37449,43826,42093,47877,42922,35576,42821,42761,35793,48448,45959,34831,42186,38017,38846,41062,32009	Xbp1,smt3,CG14184,PsGEF,Gprk1,olf186-F,Csk,RhoGEF2,Tao,Efa6,ed,Snx3,Klp64D,Cnot4,flw,jeb,Rheb,Kul,CG44085,BicD,Rel,Itp-r83A,hyd,Pitslre,cv-d,spen,Diap1,Ubr3,Pink1,sun,Listericin,Usp8,Cow,E2f1,Fkbp14,Actbeta,Sur-8,tws,Pp1alpha-96A,Mob4,Pli,RpS3,RagC-D,CkIIalpha,mts,Dyrk2,14-3-3epsilon,Pdk1,lqf,pyd,Imp
GO:0023056	positive regulation of signaling	0.56236	-0.575614	147	51	0.063197	44205,41921,40292,41181,40664,41087,35051,34732,43501,117332,36295,44289,38611,34416,41551,33619,32948,42665,41398,36915,37040,31224,3355013,40193,33981,44226,32009,41062,38846,42186,38017,34831,45959,48448,35793,42761,42821,35576,47877,42922,42093,43826,37449,42550,42733,42509,36183,44046,31607,31713,39753	spen,cv-d,Pitslre,hyd,Itp-r83A,Rel,BicD,CG44085,Kul,Rheb,jeb,flw,Klp64D,Cnot4,Snx3,ed,Tao,Efa6,Csk,RhoGEF2,olf186-F,PsGEF,Gprk1,CG14184,smt3,Xbp1,Imp,pyd,lqf,14-3-3epsilon,Pdk1,Dyrk2,mts,CkIIalpha,RagC-D,RpS3,Pli,Mob4,tws,Pp1alpha-96A,Sur-8,Actbeta,Fkbp14,E2f1,Cow,Usp8,Listericin,sun,Pink1,Ubr3,Diap1
GO:0008380	RNA splicing	0.563239	-0.574051	43	15	0.0185874	3.14423e+77	snf,Caper,B52,Rox8,CG17454,Acn,CG7564,caz,Rm62,CG30343,CG42724,Hsc70-4,l(1)10Bb,CG7971,Imp
GO:0010769	regulation of cell morphogenesis involved in differentiation	0.563239	-0.574051	43	15	0.0185874	3.52595e+75	Lar,tutl,Rheb,Nedd4,RhoGAPp190,NetB,babos,Rac2,RhoGEF2,Pak,Sec23,AMPKalpha,bif,pros,sif
GO:0002065	columnar/cuboidal epithelial cell differentiation	0.563243	-0.574044	98	34	0.0421314	3.52594e+171	Lar,veli,cindr,scrib,Jra,Rab5,Hsc70-4,me31B,smt3,Rac2,Stat92E,spoon,Tao,ed,csw,dlg1,ct,Cip4,slmb,pigs,RanBPM,spir,Rala,kst,gus,RN-tre,kra,Diap1,puc,par-1,cact,E2f1,Pten,Pax
GO:0046530	photoreceptor cell differentiation	0.563752	-0.573142	72	25	0.0309789	4.44484e+126	scrib,Lar,mbl,Bsg,grh,Amph,Jra,Ten-m,Rala,mts,chp,boss,Ire1,sdt,tau,Syn2,bdl,tutl,csw,lola,pros,Cpn,jeb,Moe,Pten
GO:0000902	cell morphogenesis	0.566099	-0.568985	199	69	0.0855019	35576,42504,318841,48448,32406,40553,42186,32119,40680,35505,38059,44548,43826,41118,44448,43924,36041,31717,43904,33635,33981,42428,36915,31816,38611,36550,41363,33262,31596,42743,44039,38995,41225,36678,39826,42944,40155,42358,38542,46015,39958,32990,40699,37387,42496,44851,38863,37556,35259,47065,36040,37038,33418,41840,40464,41087,41852,44205,35761,5740544,326116,36963,32400,38831,44096,40517…	Mob4,slmb,Bsg,CkIIalpha,rut,Cont,14-3-3epsilon,bif,kra,scaf,Ptpmeg,lola,Actbeta,FER,scrib,jim,Pka-R2,sn,AMPKalpha,bdl,smt3,Stat92E,RhoGEF2,Moe,Klp64D,CG6701,pros,dock,pigs,cnc,Pak,h,Mical,chn,fax,tok,SREBP,Ire1,CG15019,tutl,Nedd4,parvin,Xe7,cpa,RhoGAP93B,raw,Ank2,CG13506,Lar,qsm,TER94,grh,Rab5,Hsc70-4,Ten-m,Rel,Tm1,spen,ACC,futsch,tau,robl,NetB,Rac2,wit,alpha-Cat,ct,trx,jeb
GO:0048880	sensory system development	0.569947	-0.562211	130	45	0.0557621	48448,34089,36678,31332,45959,43690,42358,41062,40958,31607,46015,44548,41474,43991,43654,44448,36945,35259,43442,38890,37038,36383,36057,31842,40464,44205,5740544,43146,36578,43385,326116,36848,33635,42428,32400,32587,33619,45278,42665,43892,41363,36295,40506,41737,31816	CkIIalpha,Sirup,chn,Rala,mts,chp,Ire1,pyd,puc,Pink1,tutl,lola,Cpn,Pten,cindr,scrib,mbl,Lar,Vha100-1,nmo,grh,Amph,Jra,AP-1gamma,Ten-m,spen,futsch,boss,Opa1,Hrb98DE,tau,Syn2,bdl,Stat92E,NetB,caz,ed,csw,Efa6,sif,pros,jeb,Arf79F,trx,Moe
GO:0150063	visual system development	0.569947	-0.562211	130	45	0.0557621	42665,45278,33619,41737,31816,41363,43892,36295,40506,33635,326116,43385,36848,32400,32587,42428,31842,40464,36578,44205,5740544,43146,35259,36945,38890,43442,43654,44448,36057,37038,36383,44548,43991,41474,46015,40958,31607,31332,45959,34089,36678,41062,43690,42358,48448	Efa6,csw,ed,trx,Moe,pros,sif,jeb,Arf79F,bdl,tau,Hrb98DE,Syn2,NetB,caz,Stat92E,AP-1gamma,Ten-m,Opa1,spen,futsch,boss,Lar,mbl,nmo,Vha100-1,cindr,scrib,Jra,grh,Amph,lola,Pten,Cpn,tutl,puc,Pink1,Rala,mts,Sirup,chn,pyd,chp,Ire1,CkIIalpha
GO:1902531	regulation of intracellular signal transduction	0.569947	-0.562211	130	45	0.0557621	44851,3355133,43826,42093,37387,43991,42550,2768852,40958,40081,42291,42186,38017,31332,34774,45959,32406,47384,44039,35793,35576,42504,43892,36295,44289,40248,33619,31459,42665,32948,41398,36915,37040,43481,31224,39454,40193,2768940,33981,36578,41087,43904,39284,34732,117332	raw,conu,Actbeta,Sur-8,cpa,Pten,E2f1,par-1,puc,Mkp3,ATPsynD,14-3-3epsilon,Pdk1,Rala,ics,mts,rut,sra,Pak,RagC-D,Mob4,slmb,sif,jeb,flw,Ide,ed,spoon,Efa6,Tao,Csk,RhoGEF2,olf186-F,alph,PsGEF,Atg1,CG14184,Pp2A-29B,smt3,Opa1,Rel,AMPKalpha,chrb,CG44085,Rheb
GO:0001654	eye development	0.569947	-0.562211	130	45	0.0557621	42428,32587,32400,36848,326116,43385,33635,36295,40506,41363,43892,31816,41737,33619,45278,42665,36383,37038,36057,44448,43654,38890,43442,35259,36945,43146,5740544,44205,36578,40464,31842,40958,31607,46015,41474,43991,44548,48448,42358,43690,41062,36678,34089,45959,31332	Stat92E,caz,NetB,Syn2,tau,Hrb98DE,bdl,jeb,Arf79F,pros,sif,Moe,trx,ed,csw,Efa6,Amph,grh,Jra,scrib,cindr,nmo,Vha100-1,Lar,mbl,boss,futsch,spen,Opa1,Ten-m,AP-1gamma,puc,Pink1,tutl,Cpn,Pten,lola,CkIIalpha,Ire1,chp,pyd,chn,Sirup,mts,Rala
GO:0006397	mRNA processing	0.571203	-0.560011	49	17	0.0210657	4.07854e+86	CG42724,CG7971,CG17454,caz,hrg,Hsc70-4,l(1)10Bb,Ire1,Imp,Caper,B52,snf,CG11486,Rox8,CG7564,Acn,Rm62
GO:0042451	purine nucleoside biosynthetic process	0.571377	-0.559707	5	2	0.00247831	4373939479	awd,AdenoK
GO:0030317	flagellated sperm motility	0.571377	-0.559707	5	2	0.00247831	3861140904	Klp64D,alphaTub84D
GO:0097722	sperm motility	0.571377	-0.559707	5	2	0.00247831	4090438611	alphaTub84D,Klp64D
GO:0046673	negative regulation of compound eye retinal cell programmed cell death	0.571377	-0.559707	5	2	0.00247831	3975331376	Diap1,norpA
GO:0006261	DNA-dependent DNA replication	0.571377	-0.559707	5	2	0.00247831	3357142550	tim,E2f1
GO:0004521	endoribonuclease activity	0.571377	-0.559707	5	2	0.00247831	4235842994	Ire1,Smg6
GO:0000184	nuclear-transcribed mRNA catabolic process, nonsense-mediated decay	0.571377	-0.559707	5	2	0.00247831	4299434804	Smg6,Smg5
GO:0010496	intercellular transport	0.571377	-0.559707	5	2	0.00247831	3306244266	shakB,Inx3
GO:0046671	negative regulation of retinal cell programmed cell death	0.571377	-0.559707	5	2	0.00247831	3975331376	Diap1,norpA
GO:0035160	maintenance of epithelial integrity, open tracheal system	0.571377	-0.559707	5	2	0.00247831	3636340081	Lac,Mkp3
GO:0009855	determination of bilateral symmetry	0.571377	-0.559707	5	2	0.00247831	3181640958	Moe,puc
GO:0090306	spindle assembly involved in meiosis	0.571377	-0.559707	5	2	0.00247831	5356742467	larp,Synd
GO:0014866	skeletal myofibril assembly	0.571377	-0.559707	5	2	0.00247831	4122532314	Mical,up
GO:0048079	regulation of cuticle pigmentation	0.571377	-0.559707	5	2	0.00247831	4069438746	Sec23,ple
GO:0001707	mesoderm formation	0.571377	-0.559707	5	2	0.00247831	3800636295	gol,jeb
GO:0009067	aspartate family amino acid biosynthetic process	0.571377	-0.559707	5	2	0.00247831	32618936782	Adi1,Got1
GO:0070570	regulation of neuron projection regeneration	0.571377	-0.559707	5	2	0.00247831	4399132009	Pten,Imp
GO:0035336	long-chain fatty-acyl-CoA metabolic process	0.571377	-0.559707	5	2	0.00247831	3602943420	CG1441,wat
GO:0007538	primary sex determination	0.571377	-0.559707	5	2	0.00247831	3144242428	snf,Stat92E
GO:0070897	transcription preinitiation complex assembly	0.571377	-0.559707	5	2	0.00247831	3177342822	Trf2,TfIIA-S
GO:0046929	negative regulation of neurotransmitter secretion	0.571377	-0.559707	5	2	0.00247831	4256135359	GABA-B-R2,sky
GO:0070613	regulation of protein processing	0.571377	-0.559707	5	2	0.00247831	3975336046	Diap1,sel
GO:0071901	negative regulation of protein serine/threonine kinase activity	0.571377	-0.559707	5	2	0.00247831	4348134774	alph,ics
GO:0002082	regulation of oxidative phosphorylation	0.571377	-0.559707	5	2	0.00247831	3160733461	Pink1,Pgk
GO:0048148	behavioral response to cocaine	0.571377	-0.559707	5	2	0.00247831	3604138872	Pka-R2,Clk
GO:0009163	nucleoside biosynthetic process	0.571377	-0.559707	5	2	0.00247831	4373939479	awd,AdenoK
GO:0010257	NADH dehydrogenase complex assembly	0.571377	-0.559707	5	2	0.00247831	4420737466	ND-23,ND-B12
GO:1903524	positive regulation of blood circulation	0.571377	-0.559707	5	2	0.00247831	3375936057	vri,Jra
GO:1903421	regulation of synaptic vesicle recycling	0.571377	-0.559707	5	2	0.00247831	3535942646	sky,Nrx-1
GO:1990928	response to amino acid starvation	0.571377	-0.559707	5	2	0.00247831	4108739150	Rel,Ilp2
GO:0045167	asymmetric protein localization involved in cell fate determination	0.571377	-0.559707	5	2	0.00247831	3208333156	dlg1,l(2)gl
GO:0008343	adult feeding behavior	0.571377	-0.559707	5	2	0.00247831	4303634117	to,SLC5A11
GO:0045823	positive regulation of heart contraction	0.571377	-0.559707	5	2	0.00247831	3605733759	Jra,vri
GO:0051091	positive regulation of DNA-binding transcription factor activity	0.571377	-0.559707	5	2	0.00247831	3398142822	smt3,TfIIA-S
GO:0009072	aromatic amino acid family metabolic process	0.571377	-0.559707	5	2	0.00247831	3238138746	CG1461,ple
GO:0043966	histone H3 acetylation	0.571377	-0.559707	5	2	0.00247831	3548341737	Nipped-A,trx
GO:0051780	behavioral response to nutrient	0.571377	-0.559707	5	2	0.00247831	3411736589	SLC5A11,Ih
GO:0070373	negative regulation of ERK1 and ERK2 cascade	0.571377	-0.559707	5	2	0.00247831	4348142291	alph,ATPsynD
GO:0002788	regulation of antifungal peptide production	0.571377	-0.559707	5	2	0.00247831	3496941087	cact,Rel
GO:0002813	regulation of biosynthetic process of antibacterial peptides active against Gram-negative bacteria	0.571377	-0.559707	5	2	0.00247831	4108731011	Rel,Dredd
GO:1902117	positive regulation of organelle assembly	0.571377	-0.559707	5	2	0.00247831	3836939958	CG11486,Nedd4
GO:0030720	oocyte localization involved in germarium-derived egg chamber formation	0.571377	-0.559707	5	2	0.00247831	4242842504	Stat92E,slmb
GO:0051589	negative regulation of neurotransmitter transport	0.571377	-0.559707	5	2	0.00247831	4256135359	GABA-B-R2,sky
GO:0003383	apical constriction	0.571377	-0.559707	5	2	0.00247831	4051736915	alpha-Cat,RhoGEF2
GO:0110020	regulation of actomyosin structure organization	0.571377	-0.559707	5	2	0.00247831	4428939958	flw,Nedd4
GO:0004402	histone acetyltransferase activity	0.571377	-0.559707	5	2	0.00247831	3231835483	tth,Nipped-A
GO:0031629	synaptic vesicle fusion to presynaptic active zone membrane	0.571377	-0.559707	5	2	0.00247831	4709142854	comt,Syx1A
GO:0043044	ATP-dependent chromatin remodeling	0.571377	-0.559707	5	2	0.00247831	4863235483	Act87E,Nipped-A
GO:0008078	mesodermal cell migration	0.571377	-0.559707	5	2	0.00247831	3629538831	jeb,Rac2
GO:0007200	phospholipase C-activating G protein-coupled receptor signaling pathway	0.571377	-0.559707	5	2	0.00247831	3137640664	norpA,Itp-r83A
GO:0003743	translation initiation factor activity	0.571377	-0.559707	5	2	0.00247831	4281933686	eIF4G2,mxt
GO:0046668	regulation of retinal cell programmed cell death	0.571377	-0.559707	5	2	0.00247831	3137639753	norpA,Diap1
GO:0050918	positive chemotaxis	0.571377	-0.559707	5	2	0.00247831	3240040464	NetB,Ten-m
GO:0051156	glucose 6-phosphate metabolic process	0.571377	-0.559707	5	2	0.00247831	3780435886	Taldo,Pgi
GO:1901659	glycosyl compound biosynthetic process	0.571377	-0.559707	5	2	0.00247831	3947943739	AdenoK,awd
GO:0051181	cofactor transport	0.571377	-0.559707	5	2	0.00247831	3594131380	CG8026,CG3556
GO:0033119	negative regulation of RNA splicing	0.571377	-0.559707	5	2	0.00247831	4338538936	Hrb98DE,BI-1
GO:0046669	regulation of compound eye retinal cell programmed cell death	0.571377	-0.559707	5	2	0.00247831	3975331376	Diap1,norpA
GO:0043407	negative regulation of MAP kinase activity	0.571377	-0.559707	5	2	0.00247831	3477443481	ics,alph
GO:0016321	female meiosis chromosome segregation	0.571377	-0.559707	5	2	0.00247831	3341832119	Rab5,bif
GO:0048042	regulation of post-mating oviposition	0.571377	-0.559707	5	2	0.00247831	3138232140	CHOp24,p24-1
GO:0002237	response to molecule of bacterial origin	0.571377	-0.559707	5	2	0.00247831	4242836057	Stat92E,Jra
GO:0046129	purine ribonucleoside biosynthetic process	0.571377	-0.559707	5	2	0.00247831	3947943739	AdenoK,awd
GO:0006206	pyrimidine nucleobase metabolic process	0.571377	-0.559707	5	2	0.00247831	3099539396	CG17896,Adk1
GO:1903317	regulation of protein maturation	0.571377	-0.559707	5	2	0.00247831	3604639753	sel,Diap1
GO:0006739	NADP metabolic process	0.571377	-0.559707	5	2	0.00247831	4429137804	Idh,Taldo
GO:0099500	vesicle fusion to plasma membrane	0.571377	-0.559707	5	2	0.00247831	4285447091	Syx1A,comt
GO:0048526	imaginal disc-derived wing expansion	0.571377	-0.559707	5	2	0.00247831	4980441248	Spn88Ea,Timp
GO:0046068	cGMP metabolic process	0.571377	-0.559707	5	2	0.00247831	4349335107	Gycalpha99B,Pde11
GO:0048017	inositol lipid-mediated signaling	0.571377	-0.559707	5	2	0.00247831	4399138017	Pten,Pdk1
GO:0007400	neuroblast fate determination	0.571377	-0.559707	5	2	0.00247831	4420541363	spen,pros
GO:0001941	postsynaptic membrane organization	0.571377	-0.559707	5	2	0.00247831	4046442646	Ten-m,Nrx-1
GO:0007368	determination of left/right symmetry	0.571377	-0.559707	5	2	0.00247831	4095831816	puc,Moe
GO:0032981	mitochondrial respiratory chain complex I assembly	0.571377	-0.559707	5	2	0.00247831	4420737466	ND-23,ND-B12
GO:0042595	behavioral response to starvation	0.571377	-0.559707	5	2	0.00247831	4303643904	to,AMPKalpha
GO:0016200	synaptic target attraction	0.571377	-0.559707	5	2	0.00247831	4046432400	Ten-m,NetB
GO:2000253	positive regulation of feeding behavior	0.571377	-0.559707	5	2	0.00247831	3281740575	CrebB,5-HT2A
GO:0042455	ribonucleoside biosynthetic process	0.571377	-0.559707	5	2	0.00247831	3947943739	AdenoK,awd
GO:0000463	maturation of LSU-rRNA from tricistronic rRNA transcript (SSU-rRNA, 5.8S rRNA, LSU-rRNA)	0.571377	-0.559707	5	2	0.00247831	3148334287	RpL35,CG4364
GO:0050975	sensory perception of touch	0.571377	-0.559707	5	2	0.00247831	3638138028	ClC-b,mri
[truncated: 3,642 more rows]

## Sheet: 2b
2b. Enriched biological processes related to the eye, for circadian genes in young heads from Kuintzle et al., 2017 (GSE81100)
TermID	Term	Enrichment	logP	Genes in Term	Target Genes in Term	Fraction of Targets in Term	Entrez Gene IDs	Gene Symbols
GO:0007602	phototransduction	0.000315965	-8.05988	40	25	0.0309789	4.23983e+126	Rh3,norpA,Itp-r83A,inaD,Gbeta76C,rtp,laza,trpl,Inx3,shakB,porin,santa-maria,Arr2,ninaC,cry,Rh4,Calx,pinta,stmA,ninaA,Gycalpha99B,Gprk1,inaC,trp,rdgB
GO:0009583	detection of light stimulus	0.000545038	-7.51466	41	25	0.0309789	4.04684e+126	laza,trpl,rtp,Itp-r83A,inaD,Gbeta76C,Rh3,norpA,trp,inaC,Gprk1,rdgB,ninaA,Gycalpha99B,Calx,pinta,stmA,ninaC,Arr2,santa-maria,shakB,Inx3,porin,Rh4,cry
GO:0016063	rhodopsin biosynthetic process	0.00136312	-6.59798	9	8	0.00991326	4.26354e+39	pinta,rdhB,santa-maria,Cnx99A,alpha-Man-IIb,Hexo1,PAPLA1,ninaA
GO:0046154	rhodopsin metabolic process	0.00136312	-6.59798	9	8	0.00991326	4.46433e+39	Cnx99A,santa-maria,pinta,rdhB,alpha-Man-IIb,Hexo1,PAPLA1,ninaA
GO:0071482	cellular response to light stimulus	0.00250304	-5.99025	29	18	0.0223048	3.13764e+89	norpA,Rh3,inaD,Gbeta76C,Ekar,Gycalpha99B,CG17059,rdgB,inaC,trp,Rh4,cry,tim,ninaC,Arr2,Tsp42Ej,Ih,PIP82
GO:0016059	deactivation of rhodopsin mediated signaling	0.00273622	-5.90118	15	11	0.0136307	3.89933e+56	Arr2,ninaC,norpA,Gbeta76C,inaD,Fbxl4,Arr1,inaC,Gprk1,Camta,rdgB
GO:0022400	regulation of rhodopsin mediated signaling pathway	0.00273622	-5.90118	15	11	0.0136307	3.13763e+56	norpA,ninaC,Arr2,Fbxl4,inaD,Gbeta76C,Arr1,rdgB,Gprk1,Camta,inaC
GO:0043473	pigmentation	0.0057913	-5.1514	20	13	0.016109	3.89733e+64	se,santa-maria,t,Cnx99A,cl,pinta,Pu,rdhB,ninaA,Hexo1,alpha-Man-IIb,PAPLA1,ple
GO:0001895	retina homeostasis	0.00888978	-4.72285	7	6	0.00743494	4.35423e+29	trp,norpA,ninaC,Arr2,Arr1,Cnx99A
GO:0009642	response to light intensity	0.0110089	-4.50905	9	7	0.0086741	4.04684e+34	laza,inaC,Ekar,Ih,Tsp42Ej,Arr2,ninaC
GO:0007603	phototransduction, visible light	0.0110958	-4.50119	19	12	0.0148699	3.13764e+61	norpA,Inx3,ninaC,Arr2,Gbeta76C,Gycalpha99B,ninaA,rdgB,trpl,Gprk1,trp,inaC
GO:0048069	eye pigmentation	0.0117032	-4.44789	17	11	0.0136307	4.19133e+54	alpha-Man-IIb,ninaA,Hexo1,PAPLA1,Cnx99A,cl,santa-maria,se,rdhB,pinta,Pu
GO:0046148	pigment biosynthetic process	0.0158677	-4.14347	24	14	0.0173482	3.43943e+69	CG5037,PAPLA1,ninaA,alpha-Man-IIb,Hexo1,l(3)02640,Cnx99A,cl,pr,santa-maria,se,rdhB,Pu,pinta
GO:0009584	detection of visible light	0.0221564	-3.80963	27	15	0.0185874	3.23404e+76	rdgB,trpl,Gprk1,inaC,trp,Gycalpha99B,ninaA,Gbeta76C,norpA,cry,Rh4,Rh3,Inx3,ninaC,Arr2
GO:0042441	eye pigment metabolic process	0.0223778	-3.79969	16	10	0.0123916	4.26144e+49	rdhB,pinta,santa-maria,Cnx99A,cl,se,Hexo1,PAPLA1,ninaA,alpha-Man-IIb
GO:0006726	eye pigment biosynthetic process	0.0223778	-3.79969	16	10	0.0123916	3.85283e+49	Hexo1,ninaA,alpha-Man-IIb,PAPLA1,rdhB,pinta,Cnx99A,cl,santa-maria,se
GO:0016056	rhodopsin mediated signaling pathway	0.0251092	-3.68452	12	8	0.00991326	4.35424e+39	trp,inaC,rdgB,Gycalpha99B,Gbeta76C,Arr2,ninaC,norpA
GO:0071484	cellular response to light intensity	0.0426999	-3.15356	3	3	0.00371747	356203658943806	Tsp42Ej,Ih,Ekar
GO:0045494	photoreceptor cell maintenance	0.0537207	-2.92396	5	4	0.00495663	3.89933e+19	Arr2,ninaC,Arr1,norpA
GO:0007464	R3/R4 cell fate commitment	0.0552038	-2.89672	7	5	0.00619579	3.60574e+24	Jra,grh,Rala,scrib,lola
GO:0048056	R3/R4 cell differentiation	0.105478	-2.24925	8	5	0.00619579	3.60574e+24	Jra,grh,Rala,scrib,lola
GO:0045313	rhabdomere membrane biogenesis	0.122265	-2.10157	2	2	0.00247831	3638331816	Amph,Moe
GO:0042572	retinol metabolic process	0.122265	-2.10157	2	2	0.00247831	4221139812	CG7675,Pdh
GO:0061541	rhabdomere morphogenesis	0.122265	-2.10157	2	2	0.00247831	42358326116	Ire1,tau

## Sheet: 2c
2c. Circadian rhythmicity of genes within the gene-ontology term "phototransduction" GO:0007602 (flybase).
NAME	SYMBOL	Circadian in young heads
Arrestin 1	Arr1	yes
Arrestin 2	Arr2	yes
cacophony	cac	no
Na/Ca-exchange protein	Calx	yes
Calmodulin	Cam	no
Calmodulin-binding transcription activator	Camta	yes
CDP-diacylglycerol synthase	Cds	yes
Ceramide kinase	Cerk	no
-	CG11426	no
Calcium and integrin binding family member 2	Cib2	yes
cryptochrome	cry	yes
Dynactin 2, p50 subunit	DCTN2-p50	yes
F box and leucine-rich-repeat gene 4	Fbxl4	yes
G protein alpha q subunit	Galphaq	yes
G protein beta-subunit 76C	Gbeta76C	yes
G protein subunit gamma at 30A	Ggamma30A	no
G protein-coupled receptor kinase 1	Gprk1	yes
Gustatory receptor 28b	Gr28b	no
Guanylyl cyclase alpha-subunit at 99B	Gycalpha99B	yes
inactivation no afterpotential C	inaC	yes
inactivation no afterpotential D	inaD	yes
inactivation no afterpotential E	inaE	no
Innexin 2	Inx2	no
Innexin 3	Inx3	yes
Innexin 5	Inx5	no
Innexin 6	Inx6	no
Innexin 7	Inx7	yes
Inositol 1,4,5,-trisphosphate receptor	Itpr	yes
king tubby	ktub	no
lazaro	laza	yes
Leucine-rich pentatricopeptide repeat containing 2	Lrpprc2	yes
neither inactivation nor afterpotential A	ninaA	yes
neither inactivation nor afterpotential B	ninaB	yes
neither inactivation nor afterpotential C	ninaC	yes
neither inactivation nor afterpotential D	ninaD	yes
neither inactivation nor afterpotential E	ninaE	yes
no receptor potential A	norpA	yes
optic ganglion reduced	ogre	no
prolonged depolarization afterpotential (PDA) is not apparent	pinta	yes
Phosphatidylinositol 4-phosphate 5-kinase 59B	PIP5K59B	no
Phosphatidylinositol synthase	Pis	no
Phospholipase D	Pld	yes
porin	porin	yes
Rab6	Rab6	no
retinal degeneration A	rdgA	no
retinal degeneration B	rdgB	yes
retinal degeneration C	rdgC	yes
Rhodopsin 2	Rh2	no
Rhodopsin 3	Rh3	yes
Rhodopsin 4	Rh4	yes
Rhodopsin 5	Rh5	yes
Rhodopsin 6	Rh6	yes
Rhodopsin 7	Rh7	no
retinophilin	rtp	yes
scavenger receptor acting in neural tissue and majority of rhodopsin is absent	santa-maria	yes
shaking B	shakB	yes
stambha A	stmA	yes
slow termination of phototransduction	stops	yes
transient receptor potential	trp	yes
Transient receptor potential cation channel A1	TrpA1	yes
transient receptor potential-like	trpl	yes
exit protein of rhodopsin and TRP A	Xport-A	yes
zero population growth	zpg	no
