# Supplementary material for: Dietary restriction and clock delay eye aging to extend lifespan in D. melanogaster
Source: Research Square preprint supplement (doi:10.21203/rs.3.rs-428198/v1), 2021-05-21
Supplement: Supplementary file 5 [file a749b969ae6ad2b229e50f83.xlsx]

## Sheet: 4a
4a. Enriched biological processes for genes that are circadian in young heads (from Kuintzle et al., 2017 [GSE81100]), and downregulated in nCLK-𝚫1 compared to control flies on AL at ZT 0 or ZT 12.
TermID	Term	Enrichment	logP	Genes in Term	Target Genes in Term	Fraction of Targets in Term	Entrez Gene IDs	Gene Symbols
GO:0046034	ATP metabolic process	5.96521e-09	-18.9373	76	33	0.0899183	4.42073e+164	ND-23,Pfrx,ATPsyndelta,ND-B12,Tpi,ATPsynB,Pglym78,ND-B14.5B,ND-24,COX5A,ND-B14.5A,ATPsyngamma,ATPsynbeta,SdhB,ND-PDSW,UQCR-14,ND-ASHI,Pgk,sun,ND-B17,ATPsynCF6,ND-42,cype,ATPsynG,ND-51,UQCR-Q,Cyt-c-p,Adk1,ND-13A,CG7834,RFeSP,PyK,UQCR-C2
GO:0006091	generation of precursor metabolites and energy	3.07175e-06	-12.6933	99	34	0.0926431	3.99883e+171	CG7430,ND-B17,Pgk,ND-ASHI,UQCR-14,ND-PDSW,SdhB,ATPsynbeta,ND-42,cype,Cyt-c-p,Atg12,UQCR-Q,ND-51,UQCR-C2,PyK,Adh,RFeSP,CG7834,ND-13A,ND-B12,CG5214,ND-23,Pfrx,CG5028,Pglym78,Tpi,Atg1,Sirup,COX5A,ND-24,ND-B14.5B,Taldo,ND-B14.5A
GO:0006119	oxidative phosphorylation	5.1774e-06	-12.1712	49	21	0.0572207	3.37443e+104	ND-13A,ND-B14.5A,RFeSP,CG7834,UQCR-C2,ND-51,ND-B14.5B,UQCR-Q,ND-24,Cyt-c-p,COX5A,cype,ND-42,ATPsynbeta,ND-PDSW,SdhB,ND-23,ND-ASHI,UQCR-14,ND-B12,ND-B17
GO:0045333	cellular respiration	1.68491e-05	-10.9912	56	22	0.0599455	3.37443e+109	ND-13A,ND-B14.5A,RFeSP,UQCR-C2,UQCR-Q,ND-B14.5B,ND-51,Sirup,COX5A,ND-24,cype,ND-42,CG5028,CG5214,UQCR-14,ND-ASHI,SdhB,ND-PDSW,ND-23,CG7430,ND-B17,ND-B12
GO:0042775	mitochondrial ATP synthesis coupled electron transport	2.5067e-05	-10.594	42	18	0.0490463	4.60404e+89	cype,ND-42,ND-B12,ND-B17,ND-PDSW,SdhB,ND-23,UQCR-14,ND-ASHI,UQCR-C2,ND-13A,RFeSP,ND-B14.5A,ND-24,COX5A,ND-51,ND-B14.5B,UQCR-Q
GO:0042773	ATP synthesis coupled electron transport	3.69123e-05	-10.207	43	18	0.0490463	3.98463e+89	UQCR-C2,ND-B14.5A,RFeSP,ND-13A,COX5A,ND-24,UQCR-Q,ND-51,ND-B14.5B,cype,ND-42,ND-B17,ND-B12,ND-ASHI,UQCR-14,ND-23,SdhB,ND-PDSW
GO:0022900	electron transport chain	4.37986e-05	-10.0359	55	21	0.0572207	4.14323e+104	COX5A,Cyt-c-p,ND-24,UQCR-Q,ND-51,ND-B14.5B,UQCR-C2,ND-13A,CG7834,RFeSP,ND-B14.5A,CG7430,ND-B17,ND-B12,UQCR-14,ND-ASHI,SdhB,ND-PDSW,ND-23,ND-42,cype
GO:0022904	respiratory electron transport chain	7.6322e-05	-9.48055	45	18	0.0490463	3.37444e+89	ND-13A,RFeSP,ND-B14.5A,UQCR-C2,ND-51,ND-B14.5B,UQCR-Q,ND-24,COX5A,cype,ND-42,SdhB,ND-PDSW,ND-23,UQCR-14,ND-ASHI,ND-B17,ND-B12
GO:0009150	purine ribonucleotide metabolic process	0.000109005	-9.12411	58	21	0.0572207	3.60294e+106	CG1441,awd,ATPsyngamma,PyK,pdgy,ATPsynbeta,CG17691,Pfrx,ATPsyndelta,Pgk,Pde11,sun,CG11089,wat,ATPsynCF6,Tpi,dlg1,ATPsynB,CG7920,Pglym78,ATPsynG
GO:0009259	ribonucleotide metabolic process	0.000109005	-9.12411	58	21	0.0572207	3.60294e+106	CG1441,awd,ATPsyngamma,PyK,pdgy,Pfrx,CG17691,ATPsynbeta,Pgk,Pde11,sun,ATPsyndelta,dlg1,Tpi,ATPsynCF6,CG11089,wat,ATPsynG,Pglym78,ATPsynB,CG7920
GO:1901135	carbohydrate derivative metabolic process	0.00014198	-8.85982	107	32	0.0871935	3.49793e+163	Idgf2,alpha-Man-Ia,ATPsynbeta,CG7990,Pgk,sun,ATPsynCF6,wat,CG11089,ATPsynG,CG1441,awd,mino,alpha-Man-IIb,Hexo1,pdgy,PyK,Pfrx,CG17691,ATPsyndelta,Pde11,dlg1,Tpi,CG31637,Pglym78,ATPsynB,CG7920,fbp,Gfat1,ninaA,ATPsyngamma,Taldo
GO:0015980	energy derivation by oxidation of organic compounds	0.000160023	-8.74019	72	24	0.0653951	4.25915e+119	ND-42,cype,CG5028,ND-23,SdhB,ND-PDSW,CG5214,ND-ASHI,UQCR-14,ND-B17,ND-B12,CG7430,RFeSP,ND-B14.5A,ND-13A,UQCR-C2,Atg12,ND-B14.5B,ND-51,UQCR-Q,Atg1,ND-24,Sirup,COX5A
GO:0006163	purine nucleotide metabolic process	0.000190718	-8.56472	60	21	0.0572207	4.27594e+106	ATPsynCF6,CG11089,wat,Tpi,dlg1,CG7920,ATPsynB,Pglym78,ATPsynG,ATPsynbeta,CG17691,Pfrx,ATPsyndelta,Pgk,Pde11,sun,ATPsyngamma,PyK,pdgy,CG1441,awd
GO:0019693	ribose phosphate metabolic process	0.000190718	-8.56472	60	21	0.0572207	3.91434e+106	ATPsynB,CG7920,Pglym78,ATPsynG,wat,ATPsynCF6,CG11089,Tpi,dlg1,Pde11,Pgk,sun,ATPsyndelta,ATPsynbeta,CG17691,Pfrx,pdgy,PyK,ATPsyngamma,CG1441,awd
GO:0006120	mitochondrial electron transport, NADH to ubiquinone	0.000315198	-8.06231	23	11	0.0299728	4.42074e+54	ND-23,ND-PDSW,ND-ASHI,ND-51,ND-B14.5B,ND-B12,ND-B17,ND-24,ND-B14.5A,ND-13A,ND-42
GO:0019637	organophosphate metabolic process	0.000342186	-7.98016	107	31	0.0844687	3.20834e+158	dlg1,Tpi,CG2201,CG11089,ATPsynCF6,wat,ATPsynG,Pglym78,CG7920,ATPsynB,fbp,Pfrx,CG17691,l(1)G0196,ATPsynbeta,CG7990,CG14945,Pgk,sun,Pde11,ATPsyndelta,ATPsyngamma,Taldo,mino,PyK,pdgy,awd,CG1441,Gfat1,Ipp,rdgB
GO:0072521	purine-containing compound metabolic process	0.000527066	-7.54818	64	21	0.0572207	4.26203e+106	PyK,pdgy,ATPsyngamma,CG1441,awd,ATPsynG,Pglym78,CG7920,ATPsynB,dlg1,Tpi,wat,ATPsynCF6,CG11089,Pde11,ATPsyndelta,Pgk,sun,Pfrx,CG17691,ATPsynbeta
GO:0007005	mitochondrion organization	0.000610668	-7.40096	69	22	0.0599455	3.43683e+111	CG5676,CG8206,Pink1,clu,CG34132,up,CG11077,UQCR-14,ND-23,Tango9,ND-B12,COX6B,Tim9a,UQCR-C2,Tom40,Atg12,CG10340,Hsc70-5,Mitofilin,Marf,Sirup,Tom20
GO:0006491	N-glycan processing	0.000631657	-7.36716	4	4	0.0108992	4.19134e+19	alpha-Man-IIb,Hexo1,alpha-Man-Ia,ninaA
GO:0035041	sperm chromatin decondensation	0.000631657	-7.36716	4	4	0.0108992	3.77983e+19	Nap1,mamo,Nlp,Nph
GO:0009117	nucleotide metabolic process	0.000836904	-7.0858	66	21	0.0572207	3.60294e+106	CG1441,awd,pdgy,PyK,ATPsyngamma,ATPsyndelta,sun,Pgk,Pde11,Pfrx,ATPsynbeta,CG17691,Pglym78,ATPsynG,CG7920,ATPsynB,dlg1,Tpi,CG11089,wat,ATPsynCF6
GO:0006753	nucleoside phosphate metabolic process	0.000836904	-7.0858	66	21	0.0572207	3.20834e+106	dlg1,Tpi,ATPsynCF6,CG11089,wat,Pglym78,ATPsynG,CG7920,ATPsynB,Pfrx,ATPsynbeta,CG17691,Pde11,ATPsyndelta,sun,Pgk,ATPsyngamma,PyK,pdgy,awd,CG1441
GO:0055114	oxidation-reduction process	0.000875051	-7.04123	187	46	0.125341	44291,43102,39304,44207,41360,37466,37217,36664,38746,31190,37804,33528,32740,41432,34089,39454,46040,43420,42591,39391,38378,35590,44228,37823,32586,31604,34925,39988,45524,33744,43515,44390,39817,39812,41407,32419,3771877,39846,33852,39950,326189,39383,42109,34996,38413,41706	Idh,CG5028,CG6084,ND-23,CG5214,ND-B12,CG7461,Cyp6a20,ple,ND-B14.5A,Taldo,ND-B14.5B,ND-24,COX5A,Sirup,Atg1,cype,wat,ND-42,CG6910,ND-30,SdhB,ND-PDSW,Phm,UQCR-14,ND-ASHI,ND-B17,CG7430,Cyp4p1,ND-13A,CG7834,RFeSP,CG4842,Pdh,Ho,CG9512,Adh,UQCR-C2,ND-51,UQCR-Q,Adi1,Atg12,Prx3,Cyt-c-p,PHGPx,Cyp6d5
GO:0055086	nucleobase-containing small molecule metabolic process	0.00155119	-6.46874	78	23	0.0626703	3.35492e+118	Gfat1,CG1441,awd,Adk1,ATPsyngamma,PyK,pdgy,ATPsynbeta,CG17691,Pfrx,ATPsyndelta,Pgk,sun,Pde11,CG11089,wat,ATPsynCF6,dlg1,Tpi,CG7920,ATPsynB,Pglym78,ATPsynG
GO:0042273	ribosomal large subunit biogenesis	0.00193807	-6.24606	20	9	0.0245232	3.15884e+44	RpL7A,RpL3,RpL10Ab,RpL12,RpL24-like,RpL6,RpL35,CG4364,RpL26
GO:0043603	cellular amide metabolic process	0.00205554	-6.18722	158	39	0.106267	3.87944e+196	RpL18,RpL26,GstD1,CG17691,eRF1,RpS20,CG7920,GstE6,CG12848,RpS27A,mRpS7,mRpL24,RpL6,RpL35,RpL12,RpL21,RpL3,RpS15Aa,CG7430,RpS10b,Phm,TER94,RpL24-like,wat,RpL32,eEF1delta,RpS25,CG13364,RpS9,RpL36,CG1441,RpS15,pdgy,RpL10Ab,RpS8,mRpL30,RpS23,tko,RpL7A
GO:0009141	nucleoside triphosphate metabolic process	0.0024604	-6.00743	17	8	0.0217984	4.40463e+39	sun,ATPsyndelta,ATPsynbeta,awd,ATPsynB,ATPsynG,ATPsynCF6,ATPsyngamma
GO:0009142	nucleoside triphosphate biosynthetic process	0.0024604	-6.00743	17	8	0.0217984	4.38294e+39	ATPsynbeta,awd,ATPsyndelta,sun,ATPsynCF6,ATPsyngamma,ATPsynB,ATPsynG
GO:0009206	purine ribonucleoside triphosphate biosynthetic process	0.0024604	-6.00743	17	8	0.0217984	4.37394e+39	awd,ATPsynbeta,sun,ATPsyndelta,ATPsyngamma,ATPsynCF6,ATPsynG,ATPsynB
GO:0009144	purine nucleoside triphosphate metabolic process	0.0024604	-6.00743	17	8	0.0217984	3.91435e+39	ATPsynB,ATPsynG,ATPsynCF6,ATPsyngamma,ATPsyndelta,sun,ATPsynbeta,awd
GO:0009201	ribonucleoside triphosphate biosynthetic process	0.0024604	-6.00743	17	8	0.0217984	3.19504e+39	ATPsyndelta,sun,ATPsynbeta,awd,ATPsynB,ATPsynG,ATPsynCF6,ATPsyngamma
GO:0009205	purine ribonucleoside triphosphate metabolic process	0.0024604	-6.00743	17	8	0.0217984	4.40463e+39	sun,ATPsyndelta,awd,ATPsynbeta,ATPsynG,ATPsynB,ATPsyngamma,ATPsynCF6
GO:0009145	purine nucleoside triphosphate biosynthetic process	0.0024604	-6.00743	17	8	0.0217984	4.37394e+39	awd,ATPsynbeta,sun,ATPsyndelta,ATPsyngamma,ATPsynCF6,ATPsynG,ATPsynB
GO:0009199	ribonucleoside triphosphate metabolic process	0.0024604	-6.00743	17	8	0.0217984	3.91435e+39	ATPsynB,ATPsynG,ATPsynCF6,ATPsyngamma,ATPsyndelta,sun,ATPsynbeta,awd
GO:0016310	phosphorylation	0.00258745	-5.95708	165	40	0.108992	4.35824e+199	Tpi,Ptpmeg,Pglym78,inaC,ND-23,Pfrx,FER,ND-B12,ND-B14.5A,Rac2,ND-B14.5B,Dyrk2,ND-24,COX5A,Ipp,Pkc53E,Atg1,Pink1,cype,ND-42,CG2201,ATPsynbeta,ND-PDSW,SdhB,UQCR-14,ND-ASHI,Pgk,ND-B17,ND-13A,CG7834,RFeSP,Csk,PyK,UQCR-C2,CG31145,bt,ND-51,UQCR-Q,awd,Cyt-c-p
GO:0035039	male pronucleus assembly	0.00276004	-5.89251	5	4	0.0108992	4.35604e+19	Nlp,Nap1,mamo,Nph
GO:0015986	ATP synthesis coupled proton transport	0.00302927	-5.79943	14	7	0.0190736	4.38294e+34	ATPsynbeta,ATPsynCF6,ATPsyngamma,ATPsynB,sun,ATPsyndelta,ATPsynG
GO:0015985	energy coupled proton transport, down electrochemical gradient	0.00302927	-5.79943	14	7	0.0190736	4.38294e+34	ATPsynbeta,ATPsynCF6,ATPsyngamma,ATPsynB,ATPsyndelta,sun,ATPsynG
GO:0006412	translation	0.00317791	-5.75153	111	29	0.0790191	3.43634e+144	eEF1delta,RpL32,CG12848,RpS25,RpL18,RpL26,eRF1,RpS10b,RpS20,RpL24-like,RpL10Ab,RpL21,RpL3,RpS8,RpS23,mRpL30,RpS15Aa,tko,RpL7A,RpS27A,mRpS7,CG13364,RpS9,mRpL24,RpL6,RpL35,RpL36,RpL12,RpS15
GO:0043604	amide biosynthetic process	0.00321228	-5.74077	121	31	0.0844687	5.01394e+156	CG12848,RpS25,eEF1delta,RpL32,RpL24-like,RpS20,CG17691,eRF1,RpS10b,RpL18,RpL26,RpS23,mRpL30,RpS15Aa,tko,RpL7A,RpL3,RpS8,RpL21,RpL10Ab,pdgy,RpL12,RpS15,RpL6,RpL35,RpL36,RpS9,mRpL24,RpS27A,mRpS7,CG13364
GO:0035214	eye-antennal disc development	0.00352967	-5.64655	11	6	0.0163488	3.97534e+29	Diap1,hyd,chinmo,Stat92E,ct,sn
GO:0043043	peptide biosynthetic process	0.00366858	-5.60795	112	29	0.0790191	4.00604e+144	RpL26,RpL18,RpS10b,eRF1,RpL24-like,RpS20,eEF1delta,RpL32,RpS25,CG12848,CG13364,mRpS7,RpS27A,mRpL24,RpS9,RpL35,RpL36,RpL6,RpL12,RpS15,RpL21,RpL10Ab,RpS8,RpL3,RpL7A,tko,mRpL30,RpS15Aa,RpS23
GO:0007469	antennal development	0.00399818	-5.52192	3	3	0.00817439	445403171739753	ct,sn,Diap1
GO:0046461	neutral lipid catabolic process	0.00399818	-5.52192	3	3	0.00817439	335323242639611	Hydr2,pdgy,bmm
GO:0070983	dendrite guidance	0.00399818	-5.52192	3	3	0.00817439	413634454032400	pros,ct,NetB
GO:0046464	acylglycerol catabolic process	0.00399818	-5.52192	3	3	0.00817439	396113242633532	bmm,pdgy,Hydr2
GO:0016052	carbohydrate catabolic process	0.00444201	-5.41665	26	10	0.027248	4.53684e+49	Treh,Atg12,Galt,Pfrx,Atg1,Pgk,Tpi,PyK,CG6910,Pglym78
GO:0022400	regulation of rhodopsin mediated signaling pathway	0.00491488	-5.31549	15	7	0.0190736	3.68973e+34	inaC,Fbxl4,Arr2,rdgB,Gbeta76C,inaD,Arr1
GO:0016059	deactivation of rhodopsin mediated signaling	0.00491488	-5.31549	15	7	0.0190736	3.68974e+34	inaC,inaD,Arr1,Fbxl4,rdgB,Arr2,Gbeta76C
GO:0006754	ATP biosynthetic process	0.00491488	-5.31549	15	7	0.0190736	3.91433e+34	ATPsynB,ATPsyndelta,sun,ATPsynG,ATPsynbeta,ATPsynCF6,ATPsyngamma
GO:0008277	regulation of G protein-coupled receptor signaling pathway	0.00570614	-5.16621	19	8	0.0217984	3.89933e+39	Arr2,Fbxl4,rdgB,Gbeta76C,sun,inaD,inaC,Arr1
GO:0006997	nucleus organization	0.00570614	-5.16621	19	8	0.0217984	4.35604e+39	Nlp,Diap1,mamo,Nph,tacc,Nap1,ctp,hyd
GO:0002181	cytoplasmic translation	0.00713979	-4.94207	87	23	0.0626703	3.91083e+114	RpS9,RpS27A,CG13364,RpS15,RpL12,RpL6,RpL36,RpL35,RpL10Ab,RpL21,RpS23,RpS15Aa,RpL7A,RpS8,RpL3,RpL18,RpL26,RpL24-like,RpS20,eRF1,RpS10b,RpS25,RpL32
GO:0007338	single fertilization	0.00717857	-4.93666	9	5	0.013624	3.23534e+24	mamo,Nap1,tacc,Nlp,Nph
GO:0009566	fertilization	0.00717857	-4.93666	9	5	0.013624	4.35594e+24	Nph,tacc,Nlp,Nap1,mamo
GO:1904748	regulation of apoptotic process involved in development	0.00724193	-4.92787	6	4	0.0108992	4.48874e+19	mdy,E2f1,Atg1,Bruce
GO:0045477	regulation of nurse cell apoptotic process	0.00724193	-4.92787	6	4	0.0108992	4.48874e+19	mdy,E2f1,Bruce,Atg1
GO:0007289	spermatid nucleus differentiation	0.00724193	-4.92787	6	4	0.0108992	3.14054e+19	ctp,hyd,Diap1,Nap1
GO:0009132	nucleoside diphosphate metabolic process	0.00756394	-4.88436	16	7	0.0190736	4.26204e+34	PyK,Pglym78,Pgk,awd,Pfrx,Tpi,dlg1
GO:0071478	cellular response to radiation	0.00775185	-4.85982	32	11	0.0299728	3.68973e+54	inaC,rdgB,Arr2,Gbeta76C,Stat92E,cry,inaD,CG17059,Tsp42Ej,Ih,PIP82
GO:0009059	macromolecule biosynthetic process	0.00811264	-4.81433	186	42	0.114441	3.29094e+211	CG7990,RpL24-like,RpS10b,E2f1,Nurf-38,RpS25,RpL32,eEF1delta,RpS9,spt4,CG13364,RpS15,Atg12,RpL36,RpL10Ab,Hexo1,alpha-Man-IIb,mRpL30,Rpb8,RpS23,RpL7A,tko,RpS8,spen,RpL18,santa-maria,RpL26,RpS20,eRF1,CG12848,mRpL24,RpS27A,mRpS7,RpL12,RpL6,ninaA,RpL35,Gfat1,RpL21,RpS15Aa,TfIIA-S,RpL3
GO:0007608	sensory perception of smell	0.00821818	-4.80141	20	8	0.0217984	3.50783e+39	Arr1,Obp19d,Obp44a,rdgB,Arr2,eag,Obp57c,Dyrk2
GO:0046939	nucleotide phosphorylation	0.00987326	-4.61792	13	6	0.0163488	4.37394e+29	awd,Tpi,Pfrx,PyK,Pglym78,Pgk
GO:0006165	nucleoside diphosphate phosphorylation	0.00987326	-4.61792	13	6	0.0163488	4.37394e+29	awd,Tpi,Pfrx,PyK,Pgk,Pglym78
GO:0071482	cellular response to light stimulus	0.0107214	-4.53551	29	10	0.027248	5.02274e+49	CG17059,Tsp42Ej,PIP82,Ih,inaC,Gbeta76C,Arr2,rdgB,inaD,cry
GO:0009260	ribonucleotide biosynthetic process	0.0127488	-4.36232	34	11	0.0299728	4.40463e+56	sun,ATPsyndelta,CG17691,ATPsynbeta,awd,pdgy,ATPsynB,ATPsynG,CG11089,ATPsynCF6,ATPsyngamma
GO:0009152	purine ribonucleotide biosynthetic process	0.0127488	-4.36232	34	11	0.0299728	4.35074e+56	ATPsyngamma,CG11089,ATPsynCF6,ATPsynG,pdgy,ATPsynB,awd,CG17691,ATPsynbeta,ATPsyndelta,sun
GO:0006517	protein deglycosylation	0.0140977	-4.26174	4	3	0.00817439	332714191338528	ninaA,alpha-Man-IIb,Hexo1
GO:0046164	alcohol catabolic process	0.0147916	-4.2137	7	4	0.0108992	4.17014e+21	Ipp,CG6910,Adh,Tpi
GO:0000470	maturation of LSU-rRNA	0.0147916	-4.2137	7	4	0.0108992	3.42873e+19	CG4364,RpL35,RpL7A,RpL10Ab
GO:0035337	fatty-acyl-CoA metabolic process	0.0147916	-4.2137	7	4	0.0108992	3.24264e+21	pdgy,wat,CG17691,CG1441
GO:1901616	organic hydroxy compound catabolic process	0.0147916	-4.2137	7	4	0.0108992	3.93914e+21	CG6910,Adh,Ipp,Tpi
GO:0007455	eye-antennal disc morphogenesis	0.0147916	-4.2137	7	4	0.0108992	3.97533e+19	Diap1,sn,hyd,Stat92E
GO:0019318	hexose metabolic process	0.0150063	-4.19929	14	6	0.0163488	4.35823e+29	Tpi,Pfrx,Galt,Pgk,alpha-Man-IIb,fbp
GO:0070585	protein localization to mitochondrion	0.0150063	-4.19929	14	6	0.0163488	3.22944e+31	Tim9a,Tom40,Tom20,CG34132,UQCR-C2,CG8206
GO:0006626	protein targeting to mitochondrion	0.0150063	-4.19929	14	6	0.0163488	3.25163e+31	CG8206,Tim9a,UQCR-C2,CG34132,Tom40,Tom20
GO:0072655	establishment of protein localization to mitochondrion	0.0150063	-4.19929	14	6	0.0163488	4.01894e+31	Tom20,Tom40,CG34132,UQCR-C2,Tim9a,CG8206
GO:0006518	peptide metabolic process	0.0168072	-4.08595	140	32	0.0871935	3.54534e+159	RpL21,RpL3,RpS15Aa,RpS27A,mRpS7,mRpL24,RpL6,RpL35,RpL12,GstE6,CG12848,RpL18,RpL26,GstD1,eRF1,RpS20,RpL10Ab,RpS8,RpS23,mRpL30,tko,RpL7A,CG13364,RpS9,RpL36,RpS15,RpL32,eEF1delta,RpS25,RpS10b,Phm,RpL24-like
GO:0090407	organophosphate biosynthetic process	0.0182435	-4.00395	59	16	0.0435967	4.37393e+81	awd,pdgy,mino,ATPsyngamma,sun,ATPsyndelta,CG7990,ATPsynbeta,l(1)G0196,CG17691,ATPsynB,ATPsynG,ATPsynCF6,CG11089,Tpi,CG2201
GO:0005975	carbohydrate metabolic process	0.0190339	-3.96153	74	19	0.0517711	3.78044e+95	Taldo,CG13937,PyK,alpha-Man-IIb,Hexo1,Rheb,Galt,Atg12,Ipp,Atg1,Tpi,fbp,CG6910,Pglym78,l(1)G0196,Treh,Pfrx,Idgf2,Pgk
GO:0104004	cellular response to environmental stimulus	0.0198774	-3.91817	36	11	0.0299728	3.65893e+54	Ih,PIP82,CG17059,Tsp42Ej,cry,Stat92E,inaD,rdgB,Arr2,Gbeta76C,inaC
GO:0071214	cellular response to abiotic stimulus	0.0198774	-3.91817	36	11	0.0299728	4.01484e+54	Gbeta76C,Arr2,rdgB,inaD,Stat92E,cry,inaC,CG17059,Tsp42Ej,PIP82,Ih
GO:0046390	ribose phosphate biosynthetic process	0.0198774	-3.91817	36	11	0.0299728	4.40463e+56	sun,ATPsyndelta,ATPsynbeta,CG17691,awd,pdgy,ATPsynB,ATPsynG,ATPsynCF6,CG11089,ATPsyngamma
GO:0006164	purine nucleotide biosynthetic process	0.0198774	-3.91817	36	11	0.0299728	4.60694e+56	ATPsynG,ATPsynB,pdgy,ATPsyngamma,ATPsynCF6,CG11089,ATPsyndelta,sun,awd,CG17691,ATPsynbeta
GO:0006637	acyl-CoA metabolic process	0.019988	-3.91262	11	5	0.013624	4.35623e+26	CG7920,pdgy,CG1441,CG17691,wat
GO:0035383	thioester metabolic process	0.019988	-3.91262	11	5	0.013624	4.35623e+26	CG7920,pdgy,wat,CG17691,CG1441
GO:0009185	ribonucleoside diphosphate metabolic process	0.0217338	-3.82888	15	6	0.0163488	3.29383e+29	Pfrx,dlg1,Tpi,Pgk,Pglym78,PyK
GO:0009179	purine ribonucleoside diphosphate metabolic process	0.0217338	-3.82888	15	6	0.0163488	4.35823e+29	Tpi,dlg1,Pfrx,Pglym78,Pgk,PyK
GO:0009135	purine nucleoside diphosphate metabolic process	0.0217338	-3.82888	15	6	0.0163488	3.29384e+29	Pfrx,Tpi,dlg1,Pgk,Pglym78,PyK
GO:0034645	cellular macromolecule biosynthetic process	0.0217558	-3.82788	175	38	0.103542	4.13434e+191	RpS25,RpL32,eEF1delta,Nurf-38,E2f1,RpL24-like,RpS10b,CG7990,tko,RpL7A,Rpb8,RpS23,mRpL30,spen,RpS8,RpL10Ab,RpS15,Atg12,RpL36,RpS9,CG13364,spt4,CG12848,RpS20,eRF1,RpL26,RpL18,RpS15Aa,TfIIA-S,RpL3,RpL21,RpL12,Gfat1,RpL35,RpL6,mRpL24,RpS27A,mRpS7
GO:0006066	alcohol metabolic process	0.0245274	-3.70796	28	9	0.0245232	4.35824e+46	Tpi,Pdh,Idh,CG5028,Adh,CG6910,Marf,l(1)G0196,Ipp
GO:0044843	cell cycle G1/S phase transition	0.0252488	-3.67898	2	2	0.00544959	11733242550	Rheb,E2f1
GO:0048800	antennal morphogenesis	0.0252488	-3.67898	2	2	0.00544959	3171739753	sn,Diap1
GO:0000082	G1/S transition of mitotic cell cycle	0.0252488	-3.67898	2	2	0.00544959	11733242550	Rheb,E2f1
GO:0032091	negative regulation of protein binding	0.0252488	-3.67898	2	2	0.00544959	3507838993	Arr1,Arr2
GO:0043697	cell dedifferentiation	0.0252488	-3.67898	2	2	0.00544959	4136342428	pros,Stat92E
GO:0006000	fructose metabolic process	0.0252488	-3.67898	2	2	0.00544959	3526532938	fbp,Pfrx
GO:0019433	triglyceride catabolic process	0.0252488	-3.67898	2	2	0.00544959	3242639611	pdgy,bmm
GO:1900117	regulation of execution phase of apoptosis	0.0252488	-3.67898	2	2	0.00544959	3975342550	Diap1,E2f1
GO:0002032	desensitization of G protein-coupled receptor signaling pathway by arrestin	0.0252488	-3.67898	2	2	0.00544959	3899335078	Arr2,Arr1
GO:0042066	perineurial glial growth	0.0252488	-3.67898	2	2	0.00544959	4624332428	poe,eag
GO:0045850	positive regulation of nurse cell apoptotic process	0.0252488	-3.67898	2	2	0.00544959	3945442550	Atg1,E2f1
GO:1904747	positive regulation of apoptotic process involved in development	0.0252488	-3.67898	2	2	0.00544959	3945442550	Atg1,E2f1
GO:0043696	dedifferentiation	0.0252488	-3.67898	2	2	0.00544959	4242841363	Stat92E,pros
GO:0006102	isocitrate metabolic process	0.0252488	-3.67898	2	2	0.00544959	4310244291	CG5028,Idh
GO:0006122	mitochondrial electron transport, ubiquinol to cytochrome c	0.0259184	-3.6528	8	4	0.0108992	3.98463e+19	UQCR-C2,UQCR-14,RFeSP,UQCR-Q
GO:0009060	aerobic respiration	0.0268587	-3.61717	24	8	0.0217984	4.31025e+39	CG5028,cype,COX5A,CG7430,CG5214,UQCR-14,ND-23,SdhB
GO:0010639	negative regulation of organelle organization	0.0289157	-3.54337	20	7	0.0190736	3.16074e+34	Pink1,tacc,Cip4,spoon,cpa,Tango9,hyd
GO:0033865	nucleoside bisphosphate metabolic process	0.0298904	-3.51022	12	5	0.013624	3.60293e+26	CG1441,CG17691,wat,CG7920,pdgy
GO:0044275	cellular carbohydrate catabolic process	0.0298904	-3.51022	12	5	0.013624	3.94544e+24	Atg1,CG6910,Tpi,Atg12,Treh
GO:0033875	ribonucleoside bisphosphate metabolic process	0.0298904	-3.51022	12	5	0.013624	4.35623e+26	CG7920,pdgy,CG1441,wat,CG17691
GO:0006757	ATP generation from ADP	0.0298904	-3.51022	12	5	0.013624	3.29384e+24	Pfrx,Tpi,Pgk,Pglym78,PyK
GO:0034032	purine nucleoside bisphosphate metabolic process	0.0298904	-3.51022	12	5	0.013624	3.60294e+26	CG1441,wat,CG17691,CG7920,pdgy
GO:0006096	glycolytic process	0.0298904	-3.51022	12	5	0.013624	3.29384e+24	Pfrx,Tpi,Pglym78,Pgk,PyK
GO:0051663	oocyte nucleus localization involved in oocyte dorsal/ventral axis specification	0.0311043	-3.47041	5	3	0.00817439	442893505142743	flw,BicD,cnc
GO:0046660	female sex differentiation	0.0311043	-3.47041	5	3	0.00817439	445404118136897	ct,hyd,inaC
GO:0008585	female gonad development	0.0311043	-3.47041	5	3	0.00817439	368974118144540	inaC,hyd,ct
GO:2000370	positive regulation of clathrin-dependent endocytosis	0.0311043	-3.47041	5	3	0.00817439	368973505148311	inaC,BicD,Pkc53E
GO:0007279	pole cell formation	0.0311043	-3.47041	5	3	0.00817439	343644058936040	me31B,tacc,TER94
GO:0019319	hexose biosynthetic process	0.0311043	-3.47041	5	3	0.00817439	352653346143582	fbp,Pgk,Tpi
GO:0046545	development of primary female sexual characteristics	0.0311043	-3.47041	5	3	0.00817439	445404118136897	ct,hyd,inaC
GO:0006094	gluconeogenesis	0.0311043	-3.47041	5	3	0.00817439	352653346143582	fbp,Pgk,Tpi
GO:0046503	glycerolipid catabolic process	0.0311043	-3.47041	5	3	0.00817439	396113242633532	bmm,pdgy,Hydr2
GO:0009314	response to radiation	0.0318062	-3.4481	83	20	0.0544959	4.21863e+101	14-3-3epsilon,rdgB,Arr2,rtp,cu,Gbeta76C,Dyrk2,ninaA,alph,inaF-B,Ih,PIP82,Tsp42Ej,santa-maria,cry,Stat92E,inaD,inaC,CG17059,dlg1
GO:0042127	regulation of cell population proliferation	0.0323338	-3.43164	78	19	0.0517711	4.83115e+96	Pkc53E,cpo,COX5A,Cyt-b5,Ilp2,pros,Csk,CG7834,FER,Stat92E,Tango9,UQCR-14,Idgf2,CG5214,CG17059,conu,Nurf-38,E2f1,dlg1
GO:0009416	response to light stimulus	0.0323338	-3.43164	78	19	0.0517711	3.76294e+96	inaD,cry,santa-maria,inaC,CG17059,dlg1,14-3-3epsilon,cu,Gbeta76C,Arr2,rtp,rdgB,Dyrk2,ninaA,alph,PIP82,Ih,inaF-B,Tsp42Ej
GO:0017144	drug metabolic process	0.0331214	-3.40758	58	15	0.0408719	4.60694e+77	ATPsynG,Adh,ATPsynB,ple,ATPsyngamma,t,ATPsynCF6,sun,ATPsyndelta,CG7430,Prx3,Adi1,Idgf2,CG12118,ATPsynbeta
GO:0072522	purine-containing compound biosynthetic process	0.035548	-3.33687	39	11	0.0299728	4.60693e+56	ATPsynG,pdgy,ATPsynB,ATPsyngamma,ATPsynCF6,CG11089,ATPsyndelta,sun,awd,CG17691,ATPsynbeta
GO:0005996	monosaccharide metabolic process	0.0406536	-3.20267	17	6	0.0163488	3.39353e+29	Galt,Pfrx,Tpi,alpha-Man-IIb,Pgk,fbp
GO:0046154	rhodopsin metabolic process	0.0409102	-3.19638	9	4	0.0108992	3.32714e+19	ninaA,alpha-Man-IIb,santa-maria,Hexo1
GO:0009642	response to light intensity	0.0409102	-3.19638	9	4	0.0108992	3.56204e+19	Tsp42Ej,Arr2,Ih,inaC
GO:0016063	rhodopsin biosynthetic process	0.0409102	-3.19638	9	4	0.0108992	3.85283e+19	Hexo1,santa-maria,alpha-Man-IIb,ninaA
GO:1901570	fatty acid derivative biosynthetic process	0.0409102	-3.19638	9	4	0.0108992	3.24264e+21	pdgy,CG1441,CG17691,wat
GO:0007600	sensory perception	0.0420034	-3.17	75	18	0.0490463	3.30404e+89	Obp19d,pros,tko,eag,rdgB,Arr2,Dyrk2,Obp57c,mri,ClC-b,Arr1,ct,t,Obp44a,inaD,cry,wtrw,inaC
GO:0032543	mitochondrial translation	0.0424011	-3.16058	13	5	0.013624	3.44123e+24	mRpS7,mRpL24,CG12848,mRpL30,tko
GO:0046031	ADP metabolic process	0.0424011	-3.16058	13	5	0.013624	4.35823e+24	Tpi,Pfrx,Pgk,Pglym78,PyK
GO:1901293	nucleoside phosphate biosynthetic process	0.049894	-2.99785	41	11	0.0299728	4.60693e+56	ATPsynG,pdgy,ATPsynB,ATPsyngamma,CG11089,ATPsynCF6,sun,ATPsyndelta,awd,ATPsynbeta,CG17691
GO:0009165	nucleotide biosynthetic process	0.049894	-2.99785	41	11	0.0299728	4.37393e+56	awd,CG17691,ATPsynbeta,sun,ATPsyndelta,ATPsyngamma,ATPsynCF6,CG11089,ATPsynG,pdgy,ATPsynB
GO:0042254	ribosome biogenesis	0.0505645	-2.98451	46	12	0.0326975	3.44124e+59	mRpS7,RpL26,CG4364,RpL35,RpL6,RpL24-like,RpL12,RpS15,RpL10Ab,RpS8,RpL3,RpL7A
GO:0046174	polyol catabolic process	0.0549667	-2.90103	6	3	0.00817439	417013939143582	Ipp,CG6910,Tpi
GO:0033013	tetrapyrrole metabolic process	0.0549667	-2.90103	6	3	0.00817439	318574140746140	CG12118,Ho,l(3)02640
GO:0046364	monosaccharide biosynthetic process	0.0549667	-2.90103	6	3	0.00817439	334613526543582	Pgk,fbp,Tpi
GO:0023058	adaptation of signaling pathway	0.0549667	-2.90103	6	3	0.00817439	368973899335078	inaC,Arr2,Arr1
GO:0050962	detection of light stimulus involved in sensory perception	0.0549667	-2.90103	6	3	0.00817439	368974230537629	inaC,cry,inaD
GO:0070936	protein K48-linked ubiquitination	0.0549667	-2.90103	6	3	0.00817439	411814282139753	hyd,Pli,Diap1
GO:0070584	mitochondrion morphogenesis	0.0549667	-2.90103	6	3	0.00817439	425873658331581	Mitofilin,Hsc70-5,Marf
GO:0006790	sulfur compound metabolic process	0.0574911	-2.85613	37	10	0.027248	4.35623e+52	CG7920,pdgy,GstE6,wat,CG31637,CG7430,GstD1,CG17691,CG1441,Adi1
GO:0033108	mitochondrial respiratory chain complex assembly	0.0576205	-2.85388	14	5	0.013624	3.40894e+24	Sirup,ND-B12,ND-23,UQCR-14,COX6B
GO:1901615	organic hydroxy compound metabolic process	0.0582793	-2.84251	52	13	0.0354223	4.17013e+66	Ipp,l(1)G0196,Marf,CG5028,Rac2,CG6910,Adh,Pdh,Tpi,Npc1a,ple,t,Idh
GO:0007520	myoblast fusion	0.0598346	-2.81617	23	7	0.0190736	4.35823e+34	Tpi,dock,Pglym78,Pgk,Rac2,PyK,Mp20
GO:0140253	cell-cell fusion	0.0598346	-2.81617	23	7	0.0190736	3.32624e+34	dock,Tpi,PyK,Rac2,Mp20,Pglym78,Pgk
GO:0006949	syncytium formation	0.0598346	-2.81617	23	7	0.0190736	3.64684e+34	Mp20,PyK,Rac2,Pgk,Pglym78,dock,Tpi
GO:0000768	syncytium formation by plasma membrane fusion	0.0598346	-2.81617	23	7	0.0190736	4.35823e+34	Tpi,dock,Pgk,Pglym78,Mp20,PyK,Rac2
GO:0000027	ribosomal large subunit assembly	0.0598457	-2.81599	10	4	0.0108992	4.13725e+19	RpL24-like,RpL12,RpL6,RpL3
GO:0010675	regulation of cellular carbohydrate metabolic process	0.0598457	-2.81599	10	4	0.0108992	3.91504e+19	Ilp2,Atg1,Nmda1,Ide
GO:1901568	fatty acid derivative metabolic process	0.0598457	-2.81599	10	4	0.0108992	3.24264e+21	pdgy,wat,CG17691,CG1441
GO:0010821	regulation of mitochondrion organization	0.0598457	-2.81599	10	4	0.0108992	3.16073e+19	Pink1,Marf,Tango9,SREBP
GO:0042045	epithelial fluid transport	0.0598457	-2.81599	10	4	0.0108992	4.34204e+19	wat,Capa,Ca-alpha1D,ClC-a
GO:0051090	regulation of DNA-binding transcription factor activity	0.0598457	-2.81599	10	4	0.0108992	3.39814e+19	smt3,TfIIA-S,14-3-3epsilon,pros
GO:0070633	transepithelial transport	0.0598457	-2.81599	10	4	0.0108992	4.34203e+19	wat,Ca-alpha1D,Capa,ClC-a
GO:0006979	response to oxidative stress	0.0665605	-2.70964	53	13	0.0354223	3.16074e+64	Pink1,Idh,ple,Ho,chrb,GLaz,alph,Prx3,cnc,Sirup,PHGPx,sun,Atg1
GO:2000241	regulation of reproductive process	0.0665605	-2.70964	53	13	0.0354223	4.02483e+65	Ide,dlg1,Diap1,Syx1A,Ptpmeg,E2f1,mdy,TER94,Adi1,Est-6,Bruce,Atg1,cnc
GO:1905879	regulation of oogenesis	0.0674556	-2.69629	38	10	0.027248	4.28544e+49	Syx1A,Ptpmeg,E2f1,Diap1,dlg1,Atg1,Bruce,cnc,TER94,mdy
GO:0048312	intracellular distribution of mitochondria	0.06775	-2.69193	3	2	0.00544959	3679331607	clu,Pink1
GO:0048521	negative regulation of behavior	0.06775	-2.69193	3	2	0.00544959	3237839150	Fbxl4,Ilp2
GO:0002768	immune response-regulating cell surface receptor signaling pathway	0.06775	-2.69193	3	2	0.00544959	3321938831	crq,Rac2
GO:2000737	negative regulation of stem cell differentiation	0.06775	-2.69193	3	2	0.00544959	4242838846	Stat92E,lqf
GO:0002433	immune response-regulating cell surface receptor signaling pathway involved in phagocytosis	0.06775	-2.69193	3	2	0.00544959	3321938831	crq,Rac2
GO:0045744	negative regulation of G protein-coupled receptor signaling pathway	0.06775	-2.69193	3	2	0.00544959	3507838993	Arr1,Arr2
GO:0002031	G protein-coupled receptor internalization	0.06775	-2.69193	3	2	0.00544959	3899335078	Arr2,Arr1
GO:0022401	negative adaptation of signaling pathway	0.06775	-2.69193	3	2	0.00544959	3507838993	Arr1,Arr2
GO:0042416	dopamine biosynthetic process	0.06775	-2.69193	3	2	0.00544959	3186338746	t,ple
GO:0043393	regulation of protein binding	0.06775	-2.69193	3	2	0.00544959	3507838993	Arr1,Arr2
GO:0034308	primary alcohol metabolic process	0.06775	-2.69193	3	2	0.00544959	377187739812	Adh,Pdh
GO:0042423	catecholamine biosynthetic process	0.06775	-2.69193	3	2	0.00544959	3186338746	t,ple
GO:0034389	lipid droplet organization	0.06775	-2.69193	3	2	0.00544959	4436031581	Rab18,Marf
GO:0006002	fructose 6-phosphate metabolic process	0.06775	-2.69193	3	2	0.00544959	335492135265	Gfat1,fbp
GO:0010823	negative regulation of mitochondrion organization	0.06775	-2.69193	3	2	0.00544959	3160741450	Pink1,Tango9
GO:0046949	fatty-acyl-CoA biosynthetic process	0.06775	-2.69193	3	2	0.00544959	324263355069	pdgy,CG17691
GO:1904886	beta-catenin destruction complex disassembly	0.06775	-2.69193	3	2	0.00544959	4428942922	flw,Pp1alpha-96A
GO:0071484	cellular response to light intensity	0.06775	-2.69193	3	2	0.00544959	3562036589	Tsp42Ej,Ih
GO:0009713	catechol-containing compound biosynthetic process	0.06775	-2.69193	3	2	0.00544959	3186338746	t,ple
GO:0006020	inositol metabolic process	0.06775	-2.69193	3	2	0.00544959	3313739391	l(1)G0196,CG6910
GO:0046189	phenol-containing compound biosynthetic process	0.06775	-2.69193	3	2	0.00544959	3186338746	t,ple
GO:0002029	desensitization of G protein-coupled receptor signaling pathway	0.06775	-2.69193	3	2	0.00544959	3507838993	Arr1,Arr2
GO:0010635	regulation of mitochondrial fusion	0.06775	-2.69193	3	2	0.00544959	3160731581	Pink1,Marf
GO:1903321	negative regulation of protein modification by small protein conjugation or removal	0.06775	-2.69193	3	2	0.00544959	4118150227	hyd,CG17059
GO:0042065	glial cell growth	0.06775	-2.69193	3	2	0.00544959	3242846243	eag,poe
GO:0008284	positive regulation of cell population proliferation	0.073413	-2.61165	24	7	0.0190736	3.49795e+36	Idgf2,CG17059,pros,conu,Stat92E,Ilp2,Tango9
GO:1901137	carbohydrate derivative biosynthetic process	0.073911	-2.60489	59	14	0.0381471	3.29094e+73	CG7990,sun,ATPsyndelta,awd,CG17691,Gfat1,ATPsynbeta,ATPsynG,ATPsynB,pdgy,ATPsyngamma,Tpi,ATPsynCF6,CG11089
GO:0140053	mitochondrial gene expression	0.0755638	-2.58278	15	5	0.013624	3.44123e+24	mRpS7,mRpL24,CG12848,mRpL30,tko
GO:0007406	negative regulation of neuroblast proliferation	0.0755638	-2.58278	15	5	0.013624	4.14324e+24	COX5A,pros,CG5214,UQCR-14,CG7834
GO:2000178	negative regulation of neural precursor cell proliferation	0.0755638	-2.58278	15	5	0.013624	4.13634e+24	pros,COX5A,CG7834,UQCR-14,CG5214
GO:0022857	transmembrane transporter activity	0.0755638	-2.58278	15	5	0.013624	3.82553e+24	CG5687,CG9657,ClC-b,SLC5A11,CG6126
GO:0022411	cellular component disassembly	0.0781201	-2.54951	34	9	0.0245232	3.43684e+44	CG5676,Vamp7,Pink1,Atg12,flw,TER94,Hsc70-5,eRF1,Pp1alpha-96A
GO:0034754	cellular hormone metabolic process	0.0826215	-2.49348	11	4	0.0108992	3.98123e+19	Pdh,Npc1a,Marf,CG9512
GO:0006936	muscle contraction	0.0826215	-2.49348	11	4	0.0108992	3.84903e+19	Chd64,up,Ca-alpha1D,bt
GO:0009055	electron transfer activity	0.0826215	-2.49348	11	4	0.0108992	3.55904e+19	SdhB,CG7834,CG7430,Cyt-c-p
GO:0048066	developmental pigmentation	0.0841568	-2.47507	20	6	0.0163488	3.87463e+29	ple,ninaA,t,alpha-Man-IIb,Hexo1,santa-maria
GO:0042255	ribosome assembly	0.0841568	-2.47507	20	6	0.0163488	4.13474e+29	RpL3,RpL6,RpL24-like,RpL12,RpS15,mRpS7
GO:0043473	pigmentation	0.0841568	-2.47507	20	6	0.0163488	3.18633e+29	t,ninaA,ple,alpha-Man-IIb,Hexo1,santa-maria
GO:0009628	response to abiotic stimulus	0.0842877	-2.47352	159	32	0.0871935	5.02273e+161	CG17059,Dh31,wtrw,inaD,cry,Eip93F,Tsp42Ej,inaF-B,CG7409,tko,Gbeta76C,Arr2,rdgB,spoon,Ptpmeg,Tpi,dlg1,santa-maria,Stat92E,inaC,tutl,Tom40,PIP82,Ih,ple,cu,rtp,14-3-3epsilon,Hsc70-5,ninaA,alph,Dyrk2
GO:0032272	negative regulation of protein polymerization	0.085098	-2.46395	7	3	0.00817439	373873145938534	cpa,spoon,Cip4
GO:1902652	secondary alcohol metabolic process	0.085098	-2.46395	7	3	0.00817439	431023158144291	CG5028,Marf,Idh
GO:2000369	regulation of clathrin-dependent endocytosis	0.085098	-2.46395	7	3	0.00817439	350514831136897	BicD,Pkc53E,inaC
GO:0006458	'de novo' protein folding	0.085098	-2.46395	7	3	0.00817439	365833327139476	Hsc70-5,ninaA,CG11267
GO:0030837	negative regulation of actin filament polymerization	0.085098	-2.46395	7	3	0.00817439	385343145937387	Cip4,spoon,cpa
GO:0030150	protein import into mitochondrial matrix	0.085098	-2.46395	7	3	0.00817439	449784018932516	Tom40,Tom20,CG8206
GO:0014902	myotube differentiation	0.0886626	-2.42292	25	7	0.0190736	3.64684e+34	Mp20,Rac2,PyK,Pgk,Pglym78,dock,Tpi
GO:0045596	negative regulation of cell differentiation	0.0892112	-2.41675	45	11	0.0299728	4.13634e+54	pros,Ptpmeg,Diap1,CG7834,COX5A,Stat92E,Bruce,alph,lqf,CG5214,UQCR-14
GO:1902600	proton transmembrane transport	0.0905102	-2.40229	40	10	0.027248	3.19504e+49	ATPsyndelta,sun,Vha14-1,ATPsynbeta,ATPsynG,ATPsynB,Vha16-1,Vha44,ATPsyngamma,ATPsynCF6
GO:0044262	cellular carbohydrate metabolic process	0.0911147	-2.39564	35	9	0.0245232	4.35824e+44	Tpi,fbp,CG6910,Atg12,Pfrx,l(1)G0196,Treh,Atg1,Ipp
GO:0048646	anatomical structure formation involved in morphogenesis	0.094026	-2.36418	172	34	0.0926431	4.13984e+170	Csk,PyK,bt,Bsg,ctp,gus,spoon,up,E2f1,ct,wat,Npc1a,Cip4,me31B,Mlp60A,Pgk,Prm,TER94,cpa,Rac2,Mp20,Pax,14-3-3epsilon,tacc,NetB,flw,poe,BicD,Pglym78,Syx1A,dock,Tpi,Stat92E,smt3
GO:0006638	neutral lipid metabolic process	0.0961675	-2.34166	16	5	0.013624	4.33504e+24	mino,mdy,bmm,pdgy,Hydr2
GO:0006639	acylglycerol metabolic process	0.0961675	-2.34166	16	5	0.013624	4.48874e+24	mdy,mino,Hydr2,pdgy,bmm
GO:0010721	negative regulation of cell development	0.105305	-2.25089	36	9	0.0245232	4.14324e+44	COX5A,Bruce,alph,UQCR-14,CG5214,pros,Ptpmeg,Diap1,CG7834
GO:0050954	sensory perception of mechanical stimulus	0.105562	-2.24845	26	7	0.0190736	3.80284e+34	mri,inaD,ClC-b,ct,wtrw,Arr2,tko
GO:0016056	rhodopsin mediated signaling pathway	0.108987	-2.21653	12	4	0.0108992	3.23404e+19	rdgB,Arr2,Gbeta76C,inaC
GO:0042044	fluid transport	0.108987	-2.21653	12	4	0.0108992	4.34204e+19	wat,ClC-a,Capa,Ca-alpha1D
GO:0006641	triglyceride metabolic process	0.108987	-2.21653	12	4	0.0108992	3.24264e+19	pdgy,bmm,mino,mdy
GO:0061077	chaperone-mediated protein folding	0.108987	-2.21653	12	4	0.0108992	3.88704e+19	CG7409,Hsc70-5,CG11267,sel
GO:0006099	tricarboxylic acid cycle	0.108987	-2.21653	12	4	0.0108992	4.31024e+19	CG5028,CG7430,SdhB,CG5214
GO:0006109	regulation of carbohydrate metabolic process	0.108987	-2.21653	12	4	0.0108992	4.02484e+19	Ide,Ilp2,Atg1,Nmda1
GO:0060180	female mating behavior	0.108987	-2.21653	12	4	0.0108992	3.74584e+19	CG10433,mbl,Est-6,Ilp2
GO:1901362	organic cyclic compound biosynthetic process	0.118189	-2.13547	113	23	0.0626703	3.24264e+116	pdgy,TfIIA-S,spen,Rpb8,ATPsyngamma,ple,spt4,Adk1,Marf,awd,ATPsynB,E2f1,Nurf-38,ATPsynG,CG11089,ATPsynCF6,l(3)02640,t,Npc1a,ATPsyndelta,sun,CG17691,ATPsynbeta
GO:0042981	regulation of apoptotic process	0.119281	-2.12628	58	13	0.0354223	4.12604e+66	Bruce,Atg1,Tango9,Den1,Prx3,Idgf2,TER94,csw,mdy,E2f1,Diap1,futsch,Pink1
GO:0010883	regulation of lipid storage	0.119298	-2.12613	17	5	0.013624	3.96114e+24	bmm,Indy,Rac2,Arf79F,mdy
GO:0032869	cellular response to insulin stimulus	0.119298	-2.12613	17	5	0.013624	3.30253e+25	Rab10,Ilp6,PyK,Ilp2,Rheb
GO:2000647	negative regulation of stem cell proliferation	0.119298	-2.12613	17	5	0.013624	4.35153e+24	CG7834,UQCR-14,CG5214,pros,COX5A
GO:0032868	response to insulin	0.119298	-2.12613	17	5	0.013624	3.30254e+25	Rab10,Ilp2,Rheb,Ilp6,PyK
GO:0034599	cellular response to oxidative stress	0.119298	-2.12613	17	5	0.013624	3.40894e+24	Sirup,Prx3,Atg1,GLaz,Idh
GO:2000736	regulation of stem cell differentiation	0.120606	-2.11523	8	3	0.00817439	424283884640506	Stat92E,lqf,Arf79F
GO:0043523	regulation of neuron apoptotic process	0.120606	-2.11523	8	3	0.00817439	3.60406e+16	TER94,futsch,Pink1
GO:0044743	protein transmembrane import into intracellular organelle	0.120606	-2.11523	8	3	0.00817439	401894497832516	Tom20,Tom40,CG8206
GO:0009066	aspartate family amino acid metabolic process	0.120606	-2.11523	8	3	0.00817439	3678232618936040	Got1,Adi1,TER94
GO:0045455	ecdysteroid metabolic process	0.120606	-2.11523	8	3	0.00817439	315813435832419	Marf,Npc1a,CG9512
GO:0007530	sex determination	0.120606	-2.11523	8	3	0.00817439	314424242833343	snf,Stat92E,chinmo
GO:0031333	negative regulation of protein complex assembly	0.120606	-2.11523	8	3	0.00817439	373873853431459	cpa,Cip4,spoon
GO:0018212	peptidyl-tyrosine modification	0.120606	-2.11523	8	3	0.00817439	413984111838059	Csk,FER,Ptpmeg
GO:0042157	lipoprotein metabolic process	0.120606	-2.11523	8	3	0.00817439	591763938332909	CG18815,Atg12,CG7990
GO:0018108	peptidyl-tyrosine phosphorylation	0.120606	-2.11523	8	3	0.00817439	413983805941118	Csk,Ptpmeg,FER
GO:0010906	regulation of glucose metabolic process	0.120606	-2.11523	8	3	0.00817439	391503945436419	Ilp2,Atg1,Nmda1
GO:0043471	regulation of cellular carbohydrate catabolic process	0.121402	-2.10865	4	2	0.00544959	3945439150	Atg1,Ilp2
GO:0016062	adaptation of rhodopsin mediated signaling	0.121402	-2.10865	4	2	0.00544959	3899336897	Arr2,inaC
GO:0051100	negative regulation of binding	0.121402	-2.10865	4	2	0.00544959	3899335078	Arr2,Arr1
GO:0007312	oocyte nucleus migration involved in oocyte dorsal/ventral axis specification	0.121402	-2.10865	4	2	0.00544959	3505144289	BicD,flw
GO:0036367	light adaption	0.121402	-2.10865	4	2	0.00544959	3899336897	Arr2,inaC
GO:0048067	cuticle pigmentation	0.121402	-2.10865	4	2	0.00544959	3874631863	ple,t
GO:0007280	pole cell migration	0.121402	-2.10865	4	2	0.00544959	4218635478	14-3-3epsilon,gus
GO:0072350	tricarboxylic acid metabolic process	0.121402	-2.10865	4	2	0.00544959	4429143102	Idh,CG5028
GO:0060142	regulation of syncytium formation by plasma membrane fusion	0.121402	-2.10865	4	2	0.00544959	3646835215	Mp20,Pax
GO:0010830	regulation of myotube differentiation	0.121402	-2.10865	4	2	0.00544959	3646835215	Mp20,Pax
GO:0090140	regulation of mitochondrial fission	0.121402	-2.10865	4	2	0.00544959	3160731581	Pink1,Marf
GO:0010166	wax metabolic process	0.121402	-2.10865	4	2	0.00544959	3602943420	CG1441,wat
GO:1901739	regulation of myoblast fusion	0.121402	-2.10865	4	2	0.00544959	3521536468	Pax,Mp20
GO:0010025	wax biosynthetic process	0.121402	-2.10865	4	2	0.00544959	4342036029	wat,CG1441
GO:0019934	cGMP-mediated signaling	0.121402	-2.10865	4	2	0.00544959	3604143541	Pka-R2,Capa
GO:1903035	negative regulation of response to wounding	0.121402	-2.10865	4	2	0.00544959	3690540459	Cbp53E,Csp
GO:0016242	negative regulation of macroautophagy	0.121402	-2.10865	4	2	0.00544959	41260117332	Bruce,Rheb
GO:0010889	regulation of sequestering of triglyceride	0.121402	-2.10865	4	2	0.00544959	3961140049	bmm,Indy
GO:1905880	negative regulation of oogenesis	0.121402	-2.10865	4	2	0.00544959	3805941260	Ptpmeg,Bruce
GO:0004467	long-chain fatty acid-CoA ligase activity	0.121402	-2.10865	4	2	0.00544959	3242640056	pdgy,CG3961
GO:0005981	regulation of glycogen catabolic process	0.121402	-2.10865	4	2	0.00544959	3945439150	Atg1,Ilp2
GO:0043066	negative regulation of apoptotic process	0.122924	-2.09619	32	8	0.0217984	5.74054e+41	futsch,Pink1,Diap1,Prx3,Tango9,Bruce,Idgf2,csw
GO:0032870	cellular response to hormone stimulus	0.122924	-2.09619	32	8	0.0217984	4.26204e+40	PyK,Nurf-38,Ilp6,Rheb,Ilp2,Rab10,Hydr2,Chd64
GO:0007286	spermatid development	0.122924	-2.09619	32	8	0.0217984	4.62434e+39	poe,Nap1,Hydr2,Bruce,hyd,ctp,Diap1,Npc1a
GO:1905952	regulation of lipid localization	0.123332	-2.09287	22	6	0.0163488	3.43584e+29	Npc1a,mdy,Arf79F,Rac2,Indy,bmm
GO:0051146	striated muscle cell differentiation	0.123855	-2.08865	53	12	0.0326975	3.90024e+60	Prm,Mp20,Mlp60A,Pgk,dock,Tpi,up,Rac2,PyK,Pglym78,bt,Bsg
GO:0022613	ribonucleoprotein complex biogenesis	0.132102	-2.02418	59	13	0.0354223	3.93384e+64	RpL10Ab,RpL3,RpS8,RpL7A,mRpS7,me31B,RpL26,RpL6,CG4364,RpL35,RpS15,RpL12,RpL24-like
GO:0046486	glycerolipid metabolic process	0.132917	-2.01803	43	10	0.027248	4.48873e+49	mdy,CG7990,Hydr2,CG14945,Ipp,rdgB,bmm,CG2201,mino,pdgy
GO:0034654	nucleobase-containing compound biosynthetic process	0.133006	-2.01736	81	17	0.0463215	3.79224e+86	Nurf-38,ATPsynB,E2f1,ATPsynG,CG11089,ATPsynCF6,sun,ATPsyndelta,ATPsynbeta,CG17691,pdgy,spen,TfIIA-S,Rpb8,ATPsyngamma,spt4,awd
GO:0042692	muscle cell differentiation	0.137646	-1.98307	54	12	0.0326975	3.88314e+60	Rac2,PyK,up,Bsg,bt,Pglym78,dock,Tpi,Mp20,Mlp60A,Pgk,Prm
GO:1902904	negative regulation of supramolecular fiber organization	0.138581	-1.9763	13	4	0.0108992	3.14594e+19	spoon,Cip4,tacc,cpa
GO:0061726	mitochondrion disassembly	0.138581	-1.9763	13	4	0.0108992	3.93833e+19	Atg12,CG5676,Hsc70-5,Pink1
GO:0000422	autophagy of mitochondrion	0.138581	-1.9763	13	4	0.0108992	3.65833e+19	Hsc70-5,Pink1,Atg12,CG5676
GO:0065002	intracellular protein transmembrane transport	0.138581	-1.9763	13	4	0.0108992	3.88194e+19	Sec63,Tom40,Tom20,CG8206
GO:0043467	regulation of generation of precursor metabolites and energy	0.138581	-1.9763	13	4	0.0108992	3.34614e+19	Pgk,Atg1,Ilp2,Pink1
GO:0051646	mitochondrion localization	0.138581	-1.9763	13	4	0.0108992	3.18841e+20	Bsg,clu,Pink1,Marf
GO:0071806	protein transmembrane transport	0.138581	-1.9763	13	4	0.0108992	3.25164e+19	CG8206,Sec63,Tom20,Tom40
GO:0006839	mitochondrial transport	0.141036	-1.95874	33	8	0.0217984	4.38294e+41	ATPsynbeta,Tom20,Tango9,CG8206,CG34132,UQCR-C2,Tom40,Tim9a
GO:0019098	reproductive behavior	0.143319	-1.94268	49	11	0.0299728	3.69453e+54	mbl,eag,Est-6,CG10433,EbpIII,tko,dlg1,ple,Rac2,pros,Ilp2
GO:0019722	calcium-mediated signaling	0.144765	-1.93265	18	5	0.013624	3.49503e+24	Ca-alpha1D,TpnC25D,Eip63F-1,TpnC41C,inaC
GO:1901653	cellular response to peptide	0.144765	-1.93265	18	5	0.013624	3.91501e+25	Ilp2,Rheb,PyK,Ilp6,Rab10
GO:0071375	cellular response to peptide hormone stimulus	0.144765	-1.93265	18	5	0.013624	3.91501e+25	Ilp2,Rheb,Ilp6,PyK,Rab10
GO:0043434	response to peptide hormone	0.144765	-1.93265	18	5	0.013624	3.30251e+25	Rab10,Rheb,Ilp2,Ilp6,PyK
GO:0051647	nucleus localization	0.144765	-1.93265	18	5	0.013624	4.42894e+25	flw,tacc,Bsg,BicD,cnc
GO:1901652	response to peptide	0.144765	-1.93265	18	5	0.013624	3.12204e+25	Ilp6,PyK,Rheb,Ilp2,Rab10
GO:0006090	pyruvate metabolic process	0.144765	-1.93265	18	5	0.013624	4.34473e+24	Pglym78,Pgk,PyK,Pfrx,Tpi
GO:0030177	positive regulation of Wnt signaling pathway	0.145743	-1.92591	23	6	0.0163488	4.29224e+29	Pp1alpha-96A,hyd,spen,flw,Dyrk2,Diap1
GO:0012501	programmed cell death	0.152237	-1.88232	55	12	0.0326975	3.16074e+59	Pink1,Diap1,E2f1,chrb,ninaA,Atg12,mbl,crq,TER94,ctp,Bruce,Atg1
GO:0003008	system process	0.152355	-1.88154	186	35	0.0953678	4.24283e+176	Stat92E,MRP,inaC,mri,ClC-b,Tpi,Obp44a,Atg1,Ca-alpha1D,eag,Chd64,Dyrk2,Obp19d,cry,me31B,inaD,wtrw,Phm,ct,Arr1,Scamp,up,Pink1,t,nAChRbeta2,ClC-a,rdgB,Arr2,Obp57c,spoon,bt,pros,tko,futsch,CG4612
GO:0007606	sensory perception of chemical stimulus	0.15481	-1.86556	39	9	0.0245232	3.30404e+44	Obp19d,pros,Arr1,Obp44a,eag,Arr2,rdgB,Dyrk2,Obp57c
GO:0007403	glial cell fate determination	0.159081	-1.83834	1	1	0.0027248	44205	spen
GO:2000435	negative regulation of protein neddylation	0.159081	-1.83834	1	1	0.0027248	50227	CG17059
GO:0031991	regulation of actomyosin contractile ring contraction	0.159081	-1.83834	1	1	0.0027248	44289	flw
GO:0019563	glycerol catabolic process	0.159081	-1.83834	1	1	0.0027248	43582	Tpi
GO:0045297	post-mating behavior	0.159081	-1.83834	1	1	0.0027248	49821	EbpIII
GO:0006189	'de novo' IMP biosynthetic process	0.159081	-1.83834	1	1	0.0027248	42973	CG11089
GO:0048076	regulation of compound eye pigmentation	0.159081	-1.83834	1	1	0.0027248	31607	Pink1
GO:0051490	negative regulation of filopodium assembly	0.159081	-1.83834	1	1	0.0027248	37387	cpa
GO:0034454	microtubule anchoring at centrosome	0.159081	-1.83834	1	1	0.0027248	31405	ctp
GO:0009218	pyrimidine ribonucleotide metabolic process	0.159081	-1.83834	1	1	0.0027248	43739	awd
GO:0019405	alditol catabolic process	0.159081	-1.83834	1	1	0.0027248	43582	Tpi
GO:0030046	parallel actin filament bundle assembly	0.159081	-1.83834	1	1	0.0027248	31717	sn
GO:0001692	histamine metabolic process	0.159081	-1.83834	1	1	0.0027248	31863	t
GO:0035046	pronuclear migration	0.159081	-1.83834	1	1	0.0027248	40589	tacc
GO:1903939	regulation of TORC2 signaling	0.159081	-1.83834	1	1	0.0027248	117332	Rheb
GO:0009148	pyrimidine nucleoside triphosphate biosynthetic process	0.159081	-1.83834	1	1	0.0027248	43739	awd
GO:0006067	ethanol metabolic process	0.159081	-1.83834	1	1	0.0027248	3771877	Adh
GO:0042321	negative regulation of circadian sleep/wake cycle, sleep	0.159081	-1.83834	1	1	0.0027248	32378	Fbxl4
GO:0046166	glyceraldehyde-3-phosphate biosynthetic process	0.159081	-1.83834	1	1	0.0027248	43582	Tpi
GO:0045818	negative regulation of glycogen catabolic process	0.159081	-1.83834	1	1	0.0027248	39150	Ilp2
GO:1901028	regulation of mitochondrial outer membrane permeabilization involved in apoptotic signaling pathway	0.159081	-1.83834	1	1	0.0027248	41450	Tango9
GO:0032228	regulation of synaptic transmission, GABAergic	0.159081	-1.83834	1	1	0.0027248	32378	Fbxl4
GO:0003746	translation elongation factor activity	0.159081	-1.83834	1	1	0.0027248	34363	eEF1delta
GO:0032875	regulation of DNA endoreduplication	0.159081	-1.83834	1	1	0.0027248	42550	E2f1
GO:1903940	negative regulation of TORC2 signaling	0.159081	-1.83834	1	1	0.0027248	117332	Rheb
GO:0010225	response to UV-C	0.159081	-1.83834	1	1	0.0027248	43481	alph
GO:1902036	regulation of hematopoietic stem cell differentiation	0.159081	-1.83834	1	1	0.0027248	40506	Arf79F
GO:0042167	heme catabolic process	0.159081	-1.83834	1	1	0.0027248	41407	Ho
GO:0070314	G1 to G0 transition	0.159081	-1.83834	1	1	0.0027248	41363	pros
GO:0006071	glycerol metabolic process	0.159081	-1.83834	1	1	0.0027248	43582	Tpi
GO:0021952	central nervous system projection neuron axonogenesis	0.159081	-1.83834	1	1	0.0027248	33981	smt3
GO:0061074	regulation of neural retina development	0.159081	-1.83834	1	1	0.0027248	41363	pros
GO:1903862	positive regulation of oxidative phosphorylation	0.159081	-1.83834	1	1	0.0027248	33461	Pgk
GO:0052803	imidazole-containing compound metabolic process	0.159081	-1.83834	1	1	0.0027248	31863	t
GO:0006069	ethanol oxidation	0.159081	-1.83834	1	1	0.0027248	3771877	Adh
GO:1905208	negative regulation of cardiocyte differentiation	0.159081	-1.83834	1	1	0.0027248	38846	lqf
GO:1901142	insulin metabolic process	0.159081	-1.83834	1	1	0.0027248	40248	Ide
GO:0033194	response to hydroperoxide	0.159081	-1.83834	1	1	0.0027248	38413	PHGPx
GO:0009235	cobalamin metabolic process	0.159081	-1.83834	1	1	0.0027248	31857	CG12118
GO:0009208	pyrimidine ribonucleoside triphosphate metabolic process	0.159081	-1.83834	1	1	0.0027248	43739	awd
GO:0042676	compound eye cone cell fate commitment	0.159081	-1.83834	1	1	0.0027248	41363	pros
GO:0046149	pigment catabolic process	0.159081	-1.83834	1	1	0.0027248	41407	Ho
GO:1904061	positive regulation of locomotor rhythm	0.159081	-1.83834	1	1	0.0027248	31607	Pink1
GO:1900744	regulation of p38MAPK cascade	0.159081	-1.83834	1	1	0.0027248	43481	alph
GO:0061332	Malpighian tubule bud morphogenesis	0.159081	-1.83834	1	1	0.0027248	44540	ct
GO:2000582	positive regulation of ATP-dependent microtubule motor activity, plus-end-directed	0.159081	-1.83834	1	1	0.0027248	31405	ctp
GO:0021781	glial cell fate commitment	0.159081	-1.83834	1	1	0.0027248	44205	spen
GO:0033501	galactose homeostasis	0.159081	-1.83834	1	1	0.0027248	33935	Galt
GO:0006228	UTP biosynthetic process	0.159081	-1.83834	1	1	0.0027248	43739	awd
GO:0016031	tRNA import into mitochondrion	0.159081	-1.83834	1	1	0.0027248	40189	Tom20
GO:0032011	ARF protein signal transduction	0.159081	-1.83834	1	1	0.0027248	40506	Arf79F
GO:0032785	negative regulation of DNA-templated transcription, elongation	0.159081	-1.83834	1	1	0.0027248	36387	spt4
GO:1900118	negative regulation of execution phase of apoptosis	0.159081	-1.83834	1	1	0.0027248	39753	Diap1
GO:2001270	regulation of cysteine-type endopeptidase activity involved in execution phase of apoptosis	0.159081	-1.83834	1	1	0.0027248	39753	Diap1
GO:0035377	transepithelial water transport	0.159081	-1.83834	1	1	0.0027248	41428	ClC-a
GO:1904457	positive regulation of neuronal action potential	0.159081	-1.83834	1	1	0.0027248	31607	Pink1
GO:0043102	amino acid salvage	0.159081	-1.83834	1	1	0.0027248	326189	Adi1
GO:0070096	mitochondrial outer membrane translocase complex assembly	0.159081	-1.83834	1	1	0.0027248	40189	Tom20
GO:1900271	regulation of long-term synaptic potentiation	0.159081	-1.83834	1	1	0.0027248	36905	Cbp53E
GO:0000002	mitochondrial genome maintenance	0.159081	-1.83834	1	1	0.0027248	43831	CG11077
GO:0009637	response to blue light	0.159081	-1.83834	1	1	0.0027248	42305	cry
GO:0006450	regulation of translational fidelity	0.159081	-1.83834	1	1	0.0027248	39108	RpS9
GO:0048078	positive regulation of compound eye pigmentation	0.159081	-1.83834	1	1	0.0027248	31607	Pink1
GO:0042985	negative regulation of amyloid precursor protein biosynthetic process	0.159081	-1.83834	1	1	0.0027248	33260	CG3662
GO:2000252	negative regulation of feeding behavior	0.159081	-1.83834	1	1	0.0027248	39150	Ilp2
GO:0032094	response to food	0.159081	-1.83834	1	1	0.0027248	39150	Ilp2
GO:0030321	transepithelial chloride transport	0.159081	-1.83834	1	1	0.0027248	41428	ClC-a
GO:0015889	cobalamin transport	0.159081	-1.83834	1	1	0.0027248	31380	CG3556
GO:0071265	L-methionine biosynthetic process	0.159081	-1.83834	1	1	0.0027248	326189	Adi1
GO:0070874	negative regulation of glycogen metabolic process	0.159081	-1.83834	1	1	0.0027248	39150	Ilp2
GO:0071483	cellular response to blue light	0.159081	-1.83834	1	1	0.0027248	42305	cry
GO:0071326	cellular response to monosaccharide stimulus	0.159081	-1.83834	1	1	0.0027248	39150	Ilp2
GO:2000576	positive regulation of microtubule motor activity	0.159081	-1.83834	1	1	0.0027248	31405	ctp
GO:0044070	regulation of anion transport	0.159081	-1.83834	1	1	0.0027248	36589	Ih
GO:0048098	antennal joint development	0.159081	-1.83834	1	1	0.0027248	44540	ct
GO:0003091	renal water homeostasis	0.159081	-1.83834	1	1	0.0027248	41428	ClC-a
GO:0019102	male somatic sex determination	0.159081	-1.83834	1	1	0.0027248	33343	chinmo
GO:1905616	regulation of miRNA mediated inhibition of translation	0.159081	-1.83834	1	1	0.0027248	34364	me31B
GO:0051892	negative regulation of cardioblast differentiation	0.159081	-1.83834	1	1	0.0027248	38846	lqf
GO:0030857	negative regulation of epithelial cell differentiation	0.159081	-1.83834	1	1	0.0027248	38059	Ptpmeg
GO:0042304	regulation of fatty acid biosynthetic process	0.159081	-1.83834	1	1	0.0027248	40155	SREBP
GO:0030845	phospholipase C-inhibiting G protein-coupled receptor signaling pathway	0.159081	-1.83834	1	1	0.0027248	36897	inaC
GO:0022611	dormancy process	0.159081	-1.83834	1	1	0.0027248	45840	cpo
GO:0060052	neurofilament cytoskeleton organization	0.159081	-1.83834	1	1	0.0027248	5740544	futsch
GO:0004743	pyruvate kinase activity	0.159081	-1.83834	1	1	0.0027248	42620	PyK
GO:0015669	gas transport	0.159081	-1.83834	1	1	0.0027248	41930	glob1
GO:0048073	regulation of eye pigmentation	0.159081	-1.83834	1	1	0.0027248	31607	Pink1
GO:0030710	regulation of border follicle cell delamination	0.159081	-1.83834	1	1	0.0027248	32083	dlg1
GO:0045912	negative regulation of carbohydrate metabolic process	0.159081	-1.83834	1	1	0.0027248	39150	Ilp2
GO:1904503	negative regulation of lipophagy	0.159081	-1.83834	1	1	0.0027248	117332	Rheb
GO:2000105	positive regulation of DNA-dependent DNA replication	0.159081	-1.83834	1	1	0.0027248	42550	E2f1
GO:0002184	cytoplasmic translational termination	0.159081	-1.83834	1	1	0.0027248	40240	eRF1
GO:1990120	messenger ribonucleoprotein complex assembly	0.159081	-1.83834	1	1	0.0027248	34364	me31B
GO:0008070	maternal determination of dorsal/ventral axis, ovarian follicular epithelium, germ-line encoded	0.159081	-1.83834	1	1	0.0027248	31459	spoon
GO:0038060	nitric oxide-cGMP-mediated signaling pathway	0.159081	-1.83834	1	1	0.0027248	43541	Capa
GO:1902866	regulation of retina development in camera-type eye	0.159081	-1.83834	1	1	0.0027248	41363	pros
GO:0010677	negative regulation of cellular carbohydrate metabolic process	0.159081	-1.83834	1	1	0.0027248	39150	Ilp2
GO:0043984	histone H4-K16 acetylation	0.159081	-1.83834	1	1	0.0027248	32318	tth
GO:0050958	magnetoreception	0.159081	-1.83834	1	1	0.0027248	42305	cry
GO:0006003	fructose 2,6-bisphosphate metabolic process	0.159081	-1.83834	1	1	0.0027248	32938	Pfrx
GO:1901555	response to paclitaxel	0.159081	-1.83834	1	1	0.0027248	40627	rtp
GO:0005986	sucrose biosynthetic process	0.159081	-1.83834	1	1	0.0027248	35265	fbp
GO:0014048	regulation of glutamate secretion	0.159081	-1.83834	1	1	0.0027248	36589	Ih
GO:1901029	negative regulation of mitochondrial outer membrane permeabilization involved in apoptotic signaling pathway	0.159081	-1.83834	1	1	0.0027248	41450	Tango9
GO:0072393	microtubule anchoring at microtubule organizing center	0.159081	-1.83834	1	1	0.0027248	31405	ctp
GO:0016108	tetraterpenoid metabolic process	0.159081	-1.83834	1	1	0.0027248	34024	santa-maria
GO:1905446	regulation of mitochondrial ATP synthesis coupled electron transport	0.159081	-1.83834	1	1	0.0027248	31607	Pink1
GO:0030034	microvillar actin bundle assembly	0.159081	-1.83834	1	1	0.0027248	31717	sn
GO:0042159	lipoprotein catabolic process	0.159081	-1.83834	1	1	0.0027248	59176	CG18815
GO:0007542	primary sex determination, germ-line	0.159081	-1.83834	1	1	0.0027248	31442	snf
GO:1905618	positive regulation of miRNA mediated inhibition of translation	0.159081	-1.83834	1	1	0.0027248	34364	me31B
GO:0046972	histone acetyltransferase activity (H4-K16 specific)	0.159081	-1.83834	1	1	0.0027248	32318	tth
GO:0009758	carbohydrate utilization	0.159081	-1.83834	1	1	0.0027248	39150	Ilp2
GO:0019509	L-methionine salvage from methylthioadenosine	0.159081	-1.83834	1	1	0.0027248	326189	Adi1
GO:0035172	hemocyte proliferation	0.159081	-1.83834	1	1	0.0027248	42428	Stat92E
GO:1903019	negative regulation of glycoprotein metabolic process	0.159081	-1.83834	1	1	0.0027248	33260	CG3662
GO:0090069	regulation of ribosome biogenesis	0.159081	-1.83834	1	1	0.0027248	117332	Rheb
GO:0009220	pyrimidine ribonucleotide biosynthetic process	0.159081	-1.83834	1	1	0.0027248	43739	awd
GO:0045873	negative regulation of sevenless signaling pathway	0.159081	-1.83834	1	1	0.0027248	43481	alph
GO:0045903	positive regulation of translational fidelity	0.159081	-1.83834	1	1	0.0027248	39108	RpS9
GO:0035234	ectopic germ cell programmed cell death	0.159081	-1.83834	1	1	0.0027248	31607	Pink1
GO:0033015	tetrapyrrole catabolic process	0.159081	-1.83834	1	1	0.0027248	41407	Ho
GO:0031365	N-terminal protein amino acid modification	0.159081	-1.83834	1	1	0.0027248	44724	san
GO:1902895	positive regulation of pri-miRNA transcription by RNA polymerase II	0.159081	-1.83834	1	1	0.0027248	40155	SREBP
GO:0009209	pyrimidine ribonucleoside triphosphate biosynthetic process	0.159081	-1.83834	1	1	0.0027248	43739	awd
GO:0006748	lipoamide metabolic process	0.159081	-1.83834	1	1	0.0027248	39988	CG7430
GO:0015137	citrate transmembrane transporter activity	0.159081	-1.83834	1	1	0.0027248	40049	Indy
GO:0052646	alditol phosphate metabolic process	0.159081	-1.83834	1	1	0.0027248	43350	mino
GO:0001694	histamine biosynthetic process	0.159081	-1.83834	1	1	0.0027248	31863	t
GO:0098908	regulation of neuronal action potential	0.159081	-1.83834	1	1	0.0027248	31607	Pink1
GO:0051031	tRNA transport	0.159081	-1.83834	1	1	0.0027248	40189	Tom20
GO:2000302	positive regulation of synaptic vesicle exocytosis	0.159081	-1.83834	1	1	0.0027248	35051	BicD
GO:0019400	alditol metabolic process	0.159081	-1.83834	1	1	0.0027248	43582	Tpi
GO:0048106	establishment of thoracic bristle planar orientation	0.159081	-1.83834	1	1	0.0027248	44205	spen
GO:0060222	regulation of retinal cone cell fate commitment	0.159081	-1.83834	1	1	0.0027248	41363	pros
GO:0006241	CTP biosynthetic process	0.159081	-1.83834	1	1	0.0027248	43739	awd
GO:0051955	regulation of amino acid transport	0.159081	-1.83834	1	1	0.0027248	36589	Ih
GO:0019207	kinase regulator activity	0.159081	-1.83834	1	1	0.0027248	42821	Pli
GO:0060572	morphogenesis of an epithelial bud	0.159081	-1.83834	1	1	0.0027248	44540	ct
GO:0045760	positive regulation of action potential	0.159081	-1.83834	1	1	0.0027248	31607	Pink1
GO:0006787	porphyrin-containing compound catabolic process	0.159081	-1.83834	1	1	0.0027248	41407	Ho
GO:0032877	positive regulation of DNA endoreduplication	0.159081	-1.83834	1	1	0.0027248	42550	E2f1
GO:0033615	mitochondrial proton-transporting ATP synthase complex assembly	0.159081	-1.83834	1	1	0.0027248	42020	CG10340
GO:0007008	outer mitochondrial membrane organization	0.159081	-1.83834	1	1	0.0027248	40189	Tom20
GO:0045740	positive regulation of DNA replication	0.159081	-1.83834	1	1	0.0027248	42550	E2f1
GO:1905035	negative regulation of antifungal innate immune response	0.159081	-1.83834	1	1	0.0027248	42821	Pli
GO:0098900	regulation of action potential	0.159081	-1.83834	1	1	0.0027248	31607	Pink1
GO:0090070	positive regulation of ribosome biogenesis	0.159081	-1.83834	1	1	0.0027248	117332	Rheb
GO:0018992	germ-line sex determination	0.159081	-1.83834	1	1	0.0027248	31442	snf
GO:0009635	response to herbicide	0.159081	-1.83834	1	1	0.0027248	43481	alph
GO:0018410	C-terminal protein amino acid modification	0.159081	-1.83834	1	1	0.0027248	39383	Atg12
GO:0071267	L-methionine salvage	0.159081	-1.83834	1	1	0.0027248	326189	Adi1
GO:0046184	aldehyde biosynthetic process	0.159081	-1.83834	1	1	0.0027248	43582	Tpi
GO:0071486	cellular response to high light intensity	0.159081	-1.83834	1	1	0.0027248	35620	Tsp42Ej
GO:0006788	heme oxidation	0.159081	-1.83834	1	1	0.0027248	41407	Ho
GO:0042984	regulation of amyloid precursor protein biosynthetic process	0.159081	-1.83834	1	1	0.0027248	33260	CG3662
GO:0002021	response to dietary excess	0.159081	-1.83834	1	1	0.0027248	40248	Ide
GO:0042116	macrophage activation	0.159081	-1.83834	1	1	0.0027248	33219	crq
GO:0002274	myeloid leukocyte activation	0.159081	-1.83834	1	1	0.0027248	33219	crq
GO:0006530	asparagine catabolic process	0.159081	-1.83834	1	1	0.0027248	36040	TER94
GO:0060465	pharynx development	0.159081	-1.83834	1	1	0.0027248	42743	cnc
GO:0010637	negative regulation of mitochondrial fusion	0.159081	-1.83834	1	1	0.0027248	31607	Pink1
GO:0002084	protein depalmitoylation	0.159081	-1.83834	1	1	0.0027248	59176	CG18815
GO:0060385	axonogenesis involved in innervation	0.159081	-1.83834	1	1	0.0027248	41363	pros
GO:0035927	RNA import into mitochondrion	0.159081	-1.83834	1	1	0.0027248	40189	Tom20
GO:1903687	negative regulation of border follicle cell migration	0.159081	-1.83834	1	1	0.0027248	38059	Ptpmeg
GO:0150011	regulation of neuron projection arborization	0.159081	-1.83834	1	1	0.0027248	34364	me31B
GO:1903294	regulation of glutamate secretion, neurotransmission	0.159081	-1.83834	1	1	0.0027248	36589	Ih
GO:2000044	negative regulation of cardiac cell fate specification	0.159081	-1.83834	1	1	0.0027248	38846	lqf
GO:0032229	negative regulation of synaptic transmission, GABAergic	0.159081	-1.83834	1	1	0.0027248	32378	Fbxl4
GO:0046051	UTP metabolic process	0.159081	-1.83834	1	1	0.0027248	43739	awd
GO:0042673	regulation of retinal cone cell fate specification	0.159081	-1.83834	1	1	0.0027248	41363	pros
GO:0006501	C-terminal protein lipidation	0.159081	-1.83834	1	1	0.0027248	39383	Atg12
GO:0050980	detection of light stimulus involved in magnetoreception	0.159081	-1.83834	1	1	0.0027248	42305	cry
GO:0009313	oligosaccharide catabolic process	0.159081	-1.83834	1	1	0.0027248	45368	Treh
GO:1903361	protein localization to basolateral plasma membrane	0.159081	-1.83834	1	1	0.0027248	43003	veli
GO:0007263	nitric oxide mediated signal transduction	0.159081	-1.83834	1	1	0.0027248	43541	Capa
GO:1901532	regulation of hematopoietic progenitor cell differentiation	0.159081	-1.83834	1	1	0.0027248	40506	Arf79F
GO:2001256	regulation of store-operated calcium entry	0.159081	-1.83834	1	1	0.0027248	33944	homer
GO:0006474	N-terminal protein amino acid acetylation	0.159081	-1.83834	1	1	0.0027248	44724	san
GO:0051890	regulation of cardioblast differentiation	0.159081	-1.83834	1	1	0.0027248	38846	lqf
GO:0009147	pyrimidine nucleoside triphosphate metabolic process	0.159081	-1.83834	1	1	0.0027248	43739	awd
GO:0032890	regulation of organic acid transport	0.159081	-1.83834	1	1	0.0027248	36589	Ih
GO:0005993	trehalose catabolic process	0.159081	-1.83834	1	1	0.0027248	45368	Treh
GO:0031646	positive regulation of nervous system process	0.159081	-1.83834	1	1	0.0027248	31607	Pink1
GO:1905034	regulation of antifungal innate immune response	0.159081	-1.83834	1	1	0.0027248	42821	Pli
GO:0007290	spermatid nucleus elongation	0.159081	-1.83834	1	1	0.0027248	31405	ctp
GO:2000043	regulation of cardiac cell fate specification	0.159081	-1.83834	1	1	0.0027248	38846	lqf
GO:0019682	glyceraldehyde-3-phosphate metabolic process	0.159081	-1.83834	1	1	0.0027248	43582	Tpi
GO:0010891	negative regulation of sequestering of triglyceride	0.159081	-1.83834	1	1	0.0027248	39611	bmm
GO:0015671	oxygen transport	0.159081	-1.83834	1	1	0.0027248	41930	glob1
GO:0034260	negative regulation of GTPase activity	0.159081	-1.83834	1	1	0.0027248	3355133	conu
GO:1901562	response to paraquat	0.159081	-1.83834	1	1	0.0027248	43481	alph
GO:0016116	carotenoid metabolic process	0.159081	-1.83834	1	1	0.0027248	34024	santa-maria
GO:0006072	glycerol-3-phosphate metabolic process	0.159081	-1.83834	1	1	0.0027248	43350	mino
GO:0071333	cellular response to glucose stimulus	0.159081	-1.83834	1	1	0.0027248	39150	Ilp2
GO:0010561	negative regulation of glycoprotein biosynthetic process	0.159081	-1.83834	1	1	0.0027248	33260	CG3662
GO:0009270	response to humidity	0.159081	-1.83834	1	1	0.0027248	40931	wtrw
GO:0071481	cellular response to X-ray	0.159081	-1.83834	1	1	0.0027248	42428	Stat92E
GO:2000434	regulation of protein neddylation	0.159081	-1.83834	1	1	0.0027248	50227	CG17059
GO:0009951	polarity specification of dorsal/ventral axis	0.159081	-1.83834	1	1	0.0027248	36046	sel
GO:0006532	aspartate biosynthetic process	0.159081	-1.83834	1	1	0.0027248	36782	Got1
GO:0051971	positive regulation of transmission of nerve impulse	0.159081	-1.83834	1	1	0.0027248	31607	Pink1
GO:0030238	male sex determination	0.159081	-1.83834	1	1	0.0027248	33343	chinmo
GO:0009882	blue light photoreceptor activity	0.159081	-1.83834	1	1	0.0027248	42305	cry
GO:0010165	response to X-ray	0.159081	-1.83834	1	1	0.0027248	42428	Stat92E
GO:0010918	positive regulation of mitochondrial membrane potential	0.159081	-1.83834	1	1	0.0027248	36583	Hsc70-5
GO:1902956	regulation of mitochondrial electron transport, NADH to ubiquinone	0.159081	-1.83834	1	1	0.0027248	31607	Pink1
GO:0021955	central nervous system neuron axonogenesis	0.159081	-1.83834	1	1	0.0027248	33981	smt3
GO:1902893	regulation of pri-miRNA transcription by RNA polymerase II	0.159081	-1.83834	1	1	0.0027248	40155	SREBP
GO:0050891	multicellular organismal water homeostasis	0.159081	-1.83834	1	1	0.0027248	41428	ClC-a
GO:1901143	insulin catabolic process	0.159081	-1.83834	1	1	0.0027248	40248	Ide
GO:0004550	nucleoside diphosphate kinase activity	0.159081	-1.83834	1	1	0.0027248	43739	awd
GO:0048075	positive regulation of eye pigmentation	0.159081	-1.83834	1	1	0.0027248	31607	Pink1
GO:2001271	negative regulation of cysteine-type endopeptidase activity involved in execution phase of apoptosis	0.159081	-1.83834	1	1	0.0027248	39753	Diap1
GO:0006982	response to lipid hydroperoxide	0.159081	-1.83834	1	1	0.0027248	38413	PHGPx
GO:0035092	sperm chromatin condensation	0.159081	-1.83834	1	1	0.0027248	37798	Nap1
GO:0071000	response to magnetism	0.159081	-1.83834	1	1	0.0027248	42305	cry
GO:2000580	regulation of ATP-dependent microtubule motor activity, plus-end-directed	0.159081	-1.83834	1	1	0.0027248	31405	ctp
GO:0019310	inositol catabolic process	0.159081	-1.83834	1	1	0.0027248	39391	CG6910
GO:0009644	response to high light intensity	0.159081	-1.83834	1	1	0.0027248	35620	Tsp42Ej
GO:0048240	sperm capacitation	0.159081	-1.83834	1	1	0.0027248	33532	Hydr2
GO:0009785	blue light signaling pathway	0.159081	-1.83834	1	1	0.0027248	42305	cry
GO:0043461	proton-transporting ATP synthase complex assembly	0.159081	-1.83834	1	1	0.0027248	42020	CG10340
GO:0005985	sucrose metabolic process	0.159081	-1.83834	1	1	0.0027248	35265	fbp
GO:0046352	disaccharide catabolic process	0.159081	-1.83834	1	1	0.0027248	45368	Treh
GO:0030033	microvillus assembly	0.159081	-1.83834	1	1	0.0027248	31717	sn
GO:0060048	cardiac muscle contraction	0.159081	-1.83834	1	1	0.0027248	32314	up
GO:0071331	cellular response to hexose stimulus	0.159081	-1.83834	1	1	0.0027248	39150	Ilp2
GO:0043687	post-translational protein modification	0.159081	-1.83834	1	1	0.0027248	39383	Atg12
GO:0051969	regulation of transmission of nerve impulse	0.159081	-1.83834	1	1	0.0027248	31607	Pink1
GO:0018160	peptidyl-pyrromethane cofactor linkage	0.159081	-1.83834	1	1	0.0027248	46140	l(3)02640
GO:0046036	CTP metabolic process	0.159081	-1.83834	1	1	0.0027248	43739	awd
GO:0061724	lipophagy	0.159081	-1.83834	1	1	0.0027248	39454	Atg1
GO:0042686	regulation of cardioblast cell fate specification	0.159081	-1.83834	1	1	0.0027248	38846	lqf
GO:0009997	negative regulation of cardioblast cell fate specification	0.159081	-1.83834	1	1	0.0027248	38846	lqf
GO:0042754	negative regulation of circadian rhythm	0.159081	-1.83834	1	1	0.0027248	32378	Fbxl4
GO:0003097	renal water transport	0.159081	-1.83834	1	1	0.0027248	41428	ClC-a
GO:0019099	female germ-line sex determination	0.159081	-1.83834	1	1	0.0027248	31442	snf
GO:0030728	ovulation	0.159081	-1.83834	1	1	0.0027248	39392	Est-6
GO:0042180	cellular ketone metabolic process	0.160454	-1.82975	9	3	0.00817439	343583158132419	Npc1a,Marf,CG9512
GO:0035166	post-embryonic hemopoiesis	0.160454	-1.82975	9	3	0.00817439	425504242843532	E2f1,Stat92E,RpS8
GO:0035167	larval lymph gland hemopoiesis	0.160454	-1.82975	9	3	0.00817439	435324255042428	RpS8,E2f1,Stat92E
GO:0030522	intracellular receptor signaling pathway	0.160454	-1.82975	9	3	0.00817439	384903792242305	Chd64,Nurf-38,cry
GO:0006006	glucose metabolic process	0.160454	-1.82975	9	3	0.00817439	435823526533461	Tpi,fbp,Pgk
GO:0042026	protein refolding	0.160454	-1.82975	9	3	0.00817439	332713658338870	ninaA,Hsc70-5,CG7409
GO:0006081	cellular aldehyde metabolic process	0.160454	-1.82975	9	3	0.00817439	3.77188e+16	Adh,Pdh,Tpi
GO:0007584	response to nutrient	0.160454	-1.82975	9	3	0.00817439	3.65893e+16	Ih,SLC5A11,CG17691
GO:0040040	thermosensory behavior	0.160454	-1.82975	9	3	0.00817439	387463145938059	ple,spoon,Ptpmeg
GO:0051093	negative regulation of developmental process	0.16431	-1.806	78	16	0.0435967	4.13634e+79	pros,Csk,Ilp2,CG7834,COX5A,Bruce,alph,lqf,Ptpmeg,Pink1,dlg1,Cip4,Diap1,Stat92E,UQCR-14,CG5214
GO:0006915	apoptotic process	0.165566	-1.79838	29	7	0.0190736	3.69454e+34	mbl,Diap1,crq,ninaA,Atg1,chrb,E2f1
GO:0008219	cell death	0.1676	-1.78617	56	12	0.0326975	4.12604e+59	Bruce,Atg1,ctp,TER94,crq,mbl,Atg12,ninaA,E2f1,chrb,Diap1,Pink1
GO:0019752	carboxylic acid metabolic process	0.168888	-1.77852	101	20	0.0544959	4.34474e+102	Pglym78,CG5028,SREBP,Tpi,Idh,Pgk,Hydr2,CG7430,Pfrx,CG1461,TER94,Got1,CG17691,CG5618,PyK,pdgy,ple,mino,CG3961,Adi1
GO:0019438	aromatic compound biosynthetic process	0.168888	-1.77852	101	20	0.0544959	4.29735e+101	CG11089,l(3)02640,t,ATPsynCF6,Nurf-38,ATPsynB,E2f1,ATPsynG,ATPsynbeta,CG17691,ATPsyndelta,sun,spen,TfIIA-S,ple,Rpb8,ATPsyngamma,pdgy,awd,spt4
GO:1903008	organelle disassembly	0.170965	-1.7663	14	4	0.0108992	3.16074e+19	Pink1,Hsc70-5,CG5676,Atg12
GO:0062012	regulation of small molecule metabolic process	0.170965	-1.7663	14	4	0.0108992	3.91504e+19	Ilp2,Atg1,SREBP,Nmda1
GO:0051494	negative regulation of cytoskeleton organization	0.170965	-1.7663	14	4	0.0108992	3.73873e+19	cpa,spoon,Cip4,tacc
GO:0042753	positive regulation of circadian rhythm	0.170965	-1.7663	14	4	0.0108992	3.16073e+19	Pink1,homer,Dh31,Ih
GO:0003012	muscle system process	0.170965	-1.7663	14	4	0.0108992	3.23144e+19	up,bt,Ca-alpha1D,Chd64
GO:1902692	regulation of neuroblast proliferation	0.172329	-1.75835	19	5	0.013624	4.14324e+24	COX5A,pros,CG5214,UQCR-14,CG7834
GO:2000177	regulation of neural precursor cell proliferation	0.172329	-1.75835	19	5	0.013624	4.13634e+24	pros,COX5A,CG7834,UQCR-14,CG5214
GO:0032984	protein-containing complex disassembly	0.172329	-1.75835	19	5	0.013624	4.02404e+24	eRF1,TER94,flw,Vamp7,Pp1alpha-96A
GO:1902275	regulation of chromatin organization	0.172329	-1.75835	19	5	0.013624	4.24284e+24	Stat92E,jim,hyd,CG8036,mamo
GO:0007603	phototransduction, visible light	0.172329	-1.75835	19	5	0.013624	3.32714e+24	ninaA,inaC,rdgB,Arr2,Gbeta76C
GO:0007602	phototransduction	0.173477	-1.75171	40	9	0.0245232	3.68973e+44	inaC,ninaA,Gbeta76C,rtp,Arr2,rdgB,inaD,santa-maria,cry
GO:0006082	organic acid metabolic process	0.18079	-1.71042	102	20	0.0544959	3.24264e+102	pdgy,PyK,CG5618,mino,ple,CG3961,Adi1,SREBP,CG5028,Pglym78,Idh,Tpi,CG7430,Pgk,Hydr2,CG17691,Got1,TER94,Pfrx,CG1461
GO:0043436	oxoacid metabolic process	0.18079	-1.71042	102	20	0.0544959	3.35507e+102	CG17691,Got1,TER94,CG1461,Pfrx,CG7430,Pgk,Hydr2,Idh,Tpi,SREBP,CG5028,Pglym78,Adi1,CG3961,mino,ple,pdgy,PyK,CG5618
GO:0048515	spermatid differentiation	0.180922	-1.70969	35	8	0.0217984	3.35324e+39	Hydr2,Bruce,hyd,ctp,poe,Nap1,Npc1a,Diap1
GO:0006457	protein folding	0.180922	-1.70969	35	8	0.0217984	3.88704e+39	CG7409,Tbce,CG8206,Csp,CG11267,ninaA,Hsc70-5,sel
GO:0043067	regulation of programmed cell death	0.181253	-1.70786	68	14	0.0381471	4.21094e+71	Prx3,Atg1,Tango9,Bruce,Den1,Idgf2,TER94,mdy,csw,E2f1,Csk,futsch,Pink1,Diap1
GO:2000242	negative regulation of reproductive process	0.181601	-1.70594	5	2	0.00544959	4126038059	Bruce,Ptpmeg
GO:0042168	heme metabolic process	0.181601	-1.70594	5	2	0.00544959	4140746140	Ho,l(3)02640
GO:0050918	positive chemotaxis	0.181601	-1.70594	5	2	0.00544959	4046432400	Ten-m,NetB
GO:0008320	protein transmembrane transporter activity	0.181601	-1.70594	5	2	0.00544959	4018944978	Tom20,Tom40
GO:0007638	mechanosensory behavior	0.181601	-1.70594	5	2	0.00544959	3122846015	tko,tutl
GO:1902476	chloride transmembrane transport	0.181601	-1.70594	5	2	0.00544959	4142836381	ClC-a,ClC-b
GO:0009067	aspartate family amino acid biosynthetic process	0.181601	-1.70594	5	2	0.00544959	32618936782	Adi1,Got1
GO:0006778	porphyrin-containing compound metabolic process	0.181601	-1.70594	5	2	0.00544959	4614041407	l(3)02640,Ho
GO:0016060	metarhodopsin inactivation	0.181601	-1.70594	5	2	0.00544959	3899335078	Arr2,Arr1
GO:0071616	acyl-CoA biosynthetic process	0.181601	-1.70594	5	2	0.00544959	324263355069	pdgy,CG17691
GO:0006739	NADP metabolic process	0.181601	-1.70594	5	2	0.00544959	4429137804	Idh,Taldo
GO:0007538	primary sex determination	0.181601	-1.70594	5	2	0.00544959	3144242428	snf,Stat92E
GO:0051091	positive regulation of DNA-binding transcription factor activity	0.181601	-1.70594	5	2	0.00544959	4282233981	TfIIA-S,smt3
GO:0070613	regulation of protein processing	0.181601	-1.70594	5	2	0.00544959	3604639753	sel,Diap1
GO:0032981	mitochondrial respiratory chain complex I assembly	0.181601	-1.70594	5	2	0.00544959	4420737466	ND-23,ND-B12
GO:0016200	synaptic target attraction	0.181601	-1.70594	5	2	0.00544959	3240040464	NetB,Ten-m
GO:0045494	photoreceptor cell maintenance	0.181601	-1.70594	5	2	0.00544959	3899335078	Arr2,Arr1
GO:0035336	long-chain fatty-acyl-CoA metabolic process	0.181601	-1.70594	5	2	0.00544959	3602943420	CG1441,wat
GO:0002082	regulation of oxidative phosphorylation	0.181601	-1.70594	5	2	0.00544959	3160733461	Pink1,Pgk
GO:1903317	regulation of protein maturation	0.181601	-1.70594	5	2	0.00544959	3975336046	Diap1,sel
GO:0000463	maturation of LSU-rRNA from tricistronic rRNA transcript (SSU-rRNA, 5.8S rRNA, LSU-rRNA)	0.181601	-1.70594	5	2	0.00544959	3428731483	CG4364,RpL35
GO:0009072	aromatic amino acid family metabolic process	0.181601	-1.70594	5	2	0.00544959	3874632381	ple,CG1461
GO:0051780	behavioral response to nutrient	0.181601	-1.70594	5	2	0.00544959	3658934117	Ih,SLC5A11
GO:0007400	neuroblast fate determination	0.181601	-1.70594	5	2	0.00544959	4136344205	pros,spen
GO:0051187	cofactor catabolic process	0.181601	-1.70594	5	2	0.00544959	4140742109	Ho,Prx3
GO:0035384	thioester biosynthetic process	0.181601	-1.70594	5	2	0.00544959	335506932426	CG17691,pdgy
GO:1901068	guanosine-containing compound metabolic process	0.181601	-1.70594	5	2	0.00544959	4373932083	awd,dlg1
GO:0010257	NADH dehydrogenase complex assembly	0.181601	-1.70594	5	2	0.00544959	3746644207	ND-B12,ND-23
GO:0001676	long-chain fatty acid metabolic process	0.181601	-1.70594	5	2	0.00544959	3242640056	pdgy,CG3961
GO:0010822	positive regulation of mitochondrion organization	0.181601	-1.70594	5	2	0.00544959	3158131607	Marf,Pink1
GO:0043470	regulation of carbohydrate catabolic process	0.181601	-1.70594	5	2	0.00544959	3915039454	Ilp2,Atg1
GO:0006721	terpenoid metabolic process	0.181601	-1.70594	5	2	0.00544959	3402439812	santa-maria,Pdh
GO:0050975	sensory perception of touch	0.181601	-1.70594	5	2	0.00544959	3638138028	ClC-b,mri
GO:0060249	anatomical structure homeostasis	0.183704	-1.69443	57	12	0.0326975	4.13983e+59	Csk,up,Arr1,Csp,Ilp2,Cbp53E,Arr2,Atg1,Pgk,Nap1,mbl,TER94
GO:0007617	mating behavior	0.184174	-1.69187	46	10	0.027248	3.91504e+49	Ilp2,Rac2,pros,ple,tko,dlg1,CG10433,Est-6,eag,mbl
GO:0007293	germarium-derived egg chamber formation	0.188358	-1.66941	30	7	0.0190736	3.50514e+34	BicD,cpa,Csk,14-3-3epsilon,Stat92E,flw,Cip4
GO:0009583	detection of light stimulus	0.193127	-1.64441	41	9	0.0245232	3.89933e+44	Arr2,rdgB,rtp,Gbeta76C,cry,santa-maria,inaD,ninaA,inaC
GO:0061919	process utilizing autophagic mechanism	0.193127	-1.64441	41	9	0.0245232	3.43684e+44	CG5676,Vamp7,Pink1,Atg1,ctp,lqf,TER94,Atg12,Hsc70-5
GO:0006914	autophagy	0.193127	-1.64441	41	9	0.0245232	3.65834e+44	Hsc70-5,lqf,TER94,Atg12,ctp,Atg1,Pink1,Vamp7,CG5676
GO:0045595	regulation of cell differentiation	0.199894	-1.60997	156	29	0.0790191	3.97533e+145	Diap1,dlg1,E2f1,Ptpmeg,Syx1A,TER94,tutl,mdy,CG5214,UQCR-14,cnc,me31B,Stat92E,Arf79F,CG7834,pros,Rac2,Cyt-b5,Rheb,alph,NetB,csw,lqf,Mp20,ctp,COX5A,Pax,Bruce,Atg1
GO:0090263	positive regulation of canonical Wnt signaling pathway	0.20172	-1.60088	20	5	0.013624	4.42054e+24	spen,flw,Diap1,Pp1alpha-96A,hyd
GO:0016333	morphogenesis of follicular epithelium	0.20172	-1.60088	20	5	0.013624	3.85345e+24	Cip4,csw,dlg1,spoon,awd
GO:0035206	regulation of hemocyte proliferation	0.20172	-1.60088	20	5	0.013624	3.79224e+24	Nurf-38,E2f1,cpo,Cyt-b5,Pkc53E
GO:0042445	hormone metabolic process	0.20172	-1.60088	20	5	0.013624	3.24194e+24	CG9512,Est-6,Marf,Pdh,Npc1a
GO:0033993	response to lipid	0.20172	-1.60088	20	5	0.013624	4.06274e+24	rtp,Nurf-38,SREBP,Hydr2,Stat92E
GO:0007618	mating	0.203023	-1.59444	47	10	0.027248	3.93923e+49	Est-6,eag,mbl,Ilp2,Rac2,pros,tko,ple,dlg1,CG10433
GO:0044272	sulfur compound biosynthetic process	0.203571	-1.59174	10	3	0.00817439	3.26189e+17	Adi1,CG17691,pdgy
GO:0008202	steroid metabolic process	0.203571	-1.59174	10	3	0.00817439	324193435831581	CG9512,Npc1a,Marf
GO:0007006	mitochondrial membrane organization	0.203571	-1.59174	10	3	0.00817439	4.37988e+16	CG34132,Tom20,Tango9
GO:0007277	pole cell development	0.203571	-1.59174	10	3	0.00817439	343643604040589	me31B,TER94,tacc
GO:0045924	regulation of female receptivity	0.203571	-1.59174	10	3	0.00817439	369453745839392	mbl,CG10433,Est-6
GO:0050906	detection of stimulus involved in sensory perception	0.203571	-1.59174	10	3	0.00817439	368973762942305	inaC,inaD,cry
GO:1901879	regulation of protein depolymerization	0.203571	-1.59174	10	3	0.00817439	5.74054e+16	futsch,tacc,cpa
GO:0071396	cellular response to lipid	0.203571	-1.59174	10	3	0.00817439	379223353242428	Nurf-38,Hydr2,Stat92E
GO:0016334	establishment or maintenance of polarity of follicular epithelium	0.205656	-1.58155	15	4	0.0108992	4.37393e+19	awd,dlg1,spoon,csw
GO:0018130	heterocycle biosynthetic process	0.205848	-1.58062	104	20	0.0544959	3.35507e+101	CG17691,ATPsynbeta,ATPsyndelta,sun,ATPsynCF6,l(3)02640,CG11089,t,ATPsynB,E2f1,Nurf-38,ATPsynG,awd,spt4,Adk1,TfIIA-S,spen,Rpb8,ATPsyngamma,pdgy
GO:0015672	monovalent inorganic cation transport	0.206836	-1.57583	64	13	0.0354223	3.19504e+64	ATPsyndelta,sun,Indy,eag,Vha14-1,ATPsynbeta,Ih,ATPsynG,ATPsynB,Vha16-1,Vha44,ATPsyngamma,ATPsynCF6
GO:0051186	cofactor metabolic process	0.211175	-1.55507	53	11	0.0299728	3.35507e+56	CG17691,CG1441,CG12118,Prx3,GstD1,wat,l(3)02640,Ho,pdgy,CG7920,GstE6
GO:0006605	protein targeting	0.212343	-1.54955	31	7	0.0190736	3.98464e+36	UQCR-C2,CG34132,Tom20,Tom40,Sec63,Tim9a,CG8206
GO:0044282	small molecule catabolic process	0.213683	-1.54326	42	9	0.0245232	3.93914e+48	CG6910,Adh,Tpi,Ipp,Hydr2,CG7430,CG17691,Galt,TER94
GO:0042063	gliogenesis	0.222471	-1.50296	26	6	0.0163488	3.28724e+29	bnb,pros,eag,spen,NetB,poe
GO:0010942	positive regulation of cell death	0.222471	-1.50296	26	6	0.0163488	1.17332e+30	Rheb,Atg1,Den1,E2f1,Csk,TER94
GO:0009950	dorsal/ventral axis specification	0.222471	-1.50296	26	6	0.0163488	3.60463e+29	sel,spoon,csw,flw,BicD,cnc
GO:0032271	regulation of protein polymerization	0.222471	-1.50296	26	6	0.0163488	4.13924e+31	Jupiter,Cip4,spoon,cpa,conu,chinmo
GO:1902903	regulation of supramolecular fiber organization	0.225107	-1.49118	37	8	0.0217984	3.33433e+43	chinmo,conu,cpa,Cip4,futsch,spoon,Jupiter,tacc
GO:0019932	second-messenger-mediated signaling	0.225107	-1.49118	37	8	0.0217984	4.78784e+39	Eip63F-1,TpnC41C,inaC,Pka-R2,Capa,Ca-alpha1D,TpnC25D,Dh31
GO:0043069	negative regulation of programmed cell death	0.225107	-1.49118	37	8	0.0217984	3.16076e+41	Pink1,futsch,Diap1,csw,Idgf2,Prx3,Tango9,Bruce
GO:0010927	cellular component assembly involved in morphogenesis	0.229985	-1.46974	54	11	0.0299728	3.18841e+55	Bsg,bt,E2f1,Rac2,up,spoon,smt3,Prm,Pax,Mlp60A,gus
GO:0007605	sensory perception of sound	0.232643	-1.45825	21	5	0.013624	3.89934e+24	Arr2,wtrw,ct,inaD,tko
GO:0034332	adherens junction organization	0.232643	-1.45825	21	5	0.013624	4.37394e+24	awd,alpha-Cat,kst,Rac2,Csk
GO:0009581	detection of external stimulus	0.235062	-1.44791	43	9	0.0245232	3.68973e+44	inaC,ninaA,Gbeta76C,Arr2,rtp,rdgB,inaD,cry,santa-maria
GO:0009582	detection of abiotic stimulus	0.235062	-1.44791	43	9	0.0245232	3.89933e+44	Arr2,rdgB,rtp,Gbeta76C,cry,santa-maria,inaD,ninaA,inaC
GO:0070925	organelle assembly	0.242034	-1.41868	95	18	0.0490463	3.94543e+90	Atg1,mRpS7,RpL12,Atg12,RpS15,RpL6,bt,Bsg,Nph,mamo,RpL3,Mlp60A,me31B,Nap1,RpL24-like,Prm,up,Nlp
GO:0042441	eye pigment metabolic process	0.242153	-1.41819	16	4	0.0108992	3.32714e+19	ninaA,alpha-Man-IIb,santa-maria,Hexo1
GO:0007310	oocyte dorsal/ventral axis specification	0.242153	-1.41819	16	4	0.0108992	4.27434e+19	cnc,BicD,flw,sel
GO:0061572	actin filament bundle organization	0.242153	-1.41819	16	4	0.0108992	4.11183e+19	FER,sn,ctp,Rac2
GO:0051017	actin filament bundle assembly	0.242153	-1.41819	16	4	0.0108992	3.88313e+19	Rac2,sn,ctp,FER
GO:0006726	eye pigment biosynthetic process	0.242153	-1.41819	16	4	0.0108992	3.32713e+19	ninaA,santa-maria,alpha-Man-IIb,Hexo1
GO:0046716	muscle cell cellular homeostasis	0.242153	-1.41819	16	4	0.0108992	3.34613e+19	Pgk,up,TER94,mbl
GO:0043474	pigment metabolic process involved in pigmentation	0.242153	-1.41819	16	4	0.0108992	3.40244e+19	santa-maria,alpha-Man-IIb,Hexo1,ninaA
GO:0017038	protein import	0.242153	-1.41819	16	4	0.0108992	4.49784e+19	Tom40,Tom20,Karybeta3,CG8206
GO:1901617	organic hydroxy compound biosynthetic process	0.242153	-1.41819	16	4	0.0108992	3.15813e+19	Marf,t,l(1)G0196,ple
GO:0043324	pigment metabolic process involved in developmental pigmentation	0.242153	-1.41819	16	4	0.0108992	4.19134e+19	alpha-Man-IIb,Hexo1,santa-maria,ninaA
GO:0050795	regulation of behavior	0.242996	-1.41471	49	10	0.027248	3.65894e+49	Ih,Ilp2,homer,Ide,Pink1,cry,me31B,Est-6,Fbxl4,Dh31
GO:0051085	chaperone cofactor-dependent protein refolding	0.244918	-1.40683	6	2	0.00544959	3658339476	Hsc70-5,CG11267
GO:0032881	regulation of polysaccharide metabolic process	0.244918	-1.40683	6	2	0.00544959	3915039454	Ilp2,Atg1
GO:0006584	catecholamine metabolic process	0.244918	-1.40683	6	2	0.00544959	3874631863	ple,t
GO:0070873	regulation of glycogen metabolic process	0.244918	-1.40683	6	2	0.00544959	3915039454	Ilp2,Atg1
GO:0007379	segment specification	0.244918	-1.40683	6	2	0.00544959	4242844205	Stat92E,spen
GO:0061723	glycophagy	0.244918	-1.40683	6	2	0.00544959	3945439383	Atg1,Atg12
GO:0014017	neuroblast fate commitment	0.244918	-1.40683	6	2	0.00544959	4136344205	pros,spen
GO:1902742	apoptotic process involved in development	0.244918	-1.40683	6	2	0.00544959	4255039454	E2f1,Atg1
GO:0002118	aggressive behavior	0.244918	-1.40683	6	2	0.00544959	3883136664	Rac2,Cyp6a20
GO:0051084	'de novo' posttranslational protein folding	0.244918	-1.40683	6	2	0.00544959	3658339476	Hsc70-5,CG11267
GO:0009712	catechol-containing compound metabolic process	0.244918	-1.40683	6	2	0.00544959	3874631863	ple,t
GO:0034030	ribonucleoside bisphosphate biosynthetic process	0.244918	-1.40683	6	2	0.00544959	335506932426	CG17691,pdgy
GO:0048311	mitochondrion distribution	0.244918	-1.40683	6	2	0.00544959	3679331607	clu,Pink1
GO:0045476	nurse cell apoptotic process	0.244918	-1.40683	6	2	0.00544959	3945442550	Atg1,E2f1
GO:0098632	cell-cell adhesion mediator activity	0.244918	-1.40683	6	2	0.00544959	31884146015	Bsg,tutl
GO:0120178	steroid hormone biosynthetic process	0.244918	-1.40683	6	2	0.00544959	3435831581	Npc1a,Marf
GO:0048867	stem cell fate determination	0.244918	-1.40683	6	2	0.00544959	4136344205	pros,spen
GO:0008069	dorsal/ventral axis specification, ovarian follicular epithelium	0.244918	-1.40683	6	2	0.00544959	3145945278	spoon,csw
GO:0042417	dopamine metabolic process	0.244918	-1.40683	6	2	0.00544959	3186338746	t,ple
GO:0010454	negative regulation of cell fate commitment	0.244918	-1.40683	6	2	0.00544959	4348138846	alph,lqf
GO:0050688	regulation of defense response to virus	0.244918	-1.40683	6	2	0.00544959	3436442428	me31B,Stat92E
GO:0045456	ecdysteroid biosynthetic process	0.244918	-1.40683	6	2	0.00544959	3158134358	Marf,Npc1a
GO:0051147	regulation of muscle cell differentiation	0.244918	-1.40683	6	2	0.00544959	3646835215	Mp20,Pax
GO:0048070	regulation of developmental pigmentation	0.244918	-1.40683	6	2	0.00544959	3874631607	ple,Pink1
GO:0006497	protein lipidation	0.244918	-1.40683	6	2	0.00544959	3938332909	Atg12,CG7990
GO:0031623	receptor internalization	0.244918	-1.40683	6	2	0.00544959	3899335078	Arr2,Arr1
GO:0072528	pyrimidine-containing compound biosynthetic process	0.244918	-1.40683	6	2	0.00544959	4373939396	awd,Adk1
GO:0016125	sterol metabolic process	0.244918	-1.40683	6	2	0.00544959	3435831581	Npc1a,Marf
GO:0033866	nucleoside bisphosphate biosynthetic process	0.244918	-1.40683	6	2	0.00544959	335506932426	CG17691,pdgy
GO:0030713	ovarian follicle cell stalk formation	0.244918	-1.40683	6	2	0.00544959	4454042428	ct,Stat92E
GO:0042158	lipoprotein biosynthetic process	0.244918	-1.40683	6	2	0.00544959	3938332909	Atg12,CG7990
GO:0043524	negative regulation of neuron apoptotic process	0.244918	-1.40683	6	2	0.00544959	574054431607	futsch,Pink1
GO:0014067	negative regulation of phosphatidylinositol 3-kinase signaling	0.244918	-1.40683	6	2	0.00544959	3945440248	Atg1,Ide
GO:0006720	isoprenoid metabolic process	0.244918	-1.40683	6	2	0.00544959	3402439812	santa-maria,Pdh
GO:0045175	basal protein localization	0.244918	-1.40683	6	2	0.00544959	3208333025	dlg1,Rab10
GO:0018993	somatic sex determination	0.244918	-1.40683	6	2	0.00544959	3144233343	snf,chinmo
GO:0051153	regulation of striated muscle cell differentiation	0.244918	-1.40683	6	2	0.00544959	3521536468	Pax,Mp20
GO:0019432	triglyceride biosynthetic process	0.244918	-1.40683	6	2	0.00544959	4335044887	mino,mdy
GO:0034033	purine nucleoside bisphosphate biosynthetic process	0.244918	-1.40683	6	2	0.00544959	335506932426	CG17691,pdgy
GO:0046890	regulation of lipid biosynthetic process	0.244918	-1.40683	6	2	0.00544959	4015537994	SREBP,CG2765
GO:0072594	establishment of protein localization to organelle	0.248551	-1.39211	38	8	0.0217984	4.49784e+41	Tom40,UQCR-C2,CG34132,Tim9a,Sec63,CG8206,Tom20,Karybeta3
GO:0007349	cellularization	0.248551	-1.39211	38	8	0.0217984	4.28543e+39	Syx1A,Npc1a,Cip4,ctp,me31B,tacc,poe,TER94
GO:0035096	larval midgut cell programmed cell death	0.248927	-1.39059	11	3	0.00817439	394543604039383	Atg1,TER94,Atg12
GO:0009755	hormone-mediated signaling pathway	0.248927	-1.39059	11	3	0.00817439	384903792233532	Chd64,Nurf-38,Hydr2
GO:0008407	chaeta morphogenesis	0.248927	-1.39059	11	3	0.00817439	314053171744205	ctp,sn,spen
GO:0048260	positive regulation of receptor-mediated endocytosis	0.248927	-1.39059	11	3	0.00817439	483113505136897	Pkc53E,BicD,inaC
GO:1903320	regulation of protein modification by small protein conjugation or removal	0.248927	-1.39059	11	3	0.00817439	411815022739753	hyd,CG17059,Diap1
GO:0042446	hormone biosynthetic process	0.248927	-1.39059	11	3	0.00817439	393923158134358	Est-6,Marf,Npc1a
GO:0006040	amino sugar metabolic process	0.248927	-1.39059	11	3	0.00817439	3.49793e+16	Idgf2,Gfat1,CG31637
GO:0043244	regulation of protein complex disassembly	0.248927	-1.39059	11	3	0.00817439	3.73874e+16	cpa,tacc,futsch
GO:0048542	lymph gland development	0.248927	-1.39059	11	3	0.00817439	435324242842550	RpS8,Stat92E,E2f1
GO:0010941	regulation of cell death	0.249016	-1.39024	78	15	0.0408719	3.97536e+77	Diap1,futsch,Pink1,Rheb,E2f1,Csk,Idgf2,TER94,csw,mdy,Atg1,Tango9,Bruce,Den1,Prx3
GO:0000209	protein polyubiquitination	0.250587	-1.38395	27	6	0.0163488	3.97534e+29	Diap1,Ubc4,Fbxl4,Pli,hyd,Bruce
GO:0009584	detection of visible light	0.250587	-1.38395	27	6	0.0163488	4.01484e+29	Gbeta76C,Arr2,rdgB,cry,inaC,ninaA
GO:0016072	rRNA metabolic process	0.264793	-1.32881	22	5	0.013624	3.14833e+24	RpL35,CG4364,RpS8,RpL7A,RpL10Ab
GO:0043068	positive regulation of programmed cell death	0.264793	-1.32881	22	5	0.013624	4.25504e+24	E2f1,Csk,Atg1,Den1,TER94
GO:0016236	macroautophagy	0.264793	-1.32881	22	5	0.013624	3.94544e+24	Atg1,Vamp7,Atg12,lqf,TER94
GO:0006364	rRNA processing	0.264793	-1.32881	22	5	0.013624	3.93384e+24	RpL10Ab,RpS8,CG4364,RpL35,RpL7A
GO:0042749	regulation of circadian sleep/wake cycle	0.264793	-1.32881	22	5	0.013624	3.23783e+24	Fbxl4,Dh31,homer,cry,Ih
GO:0032787	monocarboxylic acid metabolic process	0.269423	-1.31147	56	11	0.0299728	3.34613e+54	Pgk,Hydr2,CG3961,TER94,Pfrx,Pglym78,PyK,pdgy,SREBP,Tpi,mino
GO:0018193	peptidyl-amino acid modification	0.273838	-1.29522	62	12	0.0326975	4.37393e+59	awd,Dyrk2,smt3,inaC,ninaA,FER,Pkc53E,tth,l(3)02640,san,Ptpmeg,Csk
GO:0050768	negative regulation of neurogenesis	0.27963	-1.27429	28	6	0.0163488	4.14324e+29	COX5A,pros,alph,CG5214,UQCR-14,CG7834
GO:0007498	mesoderm development	0.27963	-1.27429	28	6	0.0163488	4.38143e+29	bt,up,csw,Cip4,flw,Prm
GO:0051606	detection of stimulus	0.279926	-1.27323	45	9	0.0245232	3.32714e+44	ninaA,inaC,santa-maria,cry,inaD,rdgB,Arr2,rtp,Gbeta76C
GO:0019751	polyol metabolic process	0.279954	-1.27313	17	4	0.0108992	4.17014e+19	Ipp,CG6910,Tpi,l(1)G0196
GO:0016051	carbohydrate biosynthetic process	0.279954	-1.27313	17	4	0.0108992	3.52654e+19	fbp,CG13937,Pgk,Tpi
GO:0048069	eye pigmentation	0.279954	-1.27313	17	4	0.0108992	3.32714e+19	ninaA,alpha-Man-IIb,santa-maria,Hexo1
GO:0043065	positive regulation of apoptotic process	0.279954	-1.27313	17	4	0.0108992	4.25504e+19	E2f1,Den1,Atg1,TER94
GO:0022618	ribonucleoprotein complex assembly	0.290002	-1.23787	34	7	0.0190736	3.44123e+34	mRpS7,me31B,RpL6,RpL3,RpS15,RpL12,RpL24-like
GO:0050877	nervous system process	0.291613	-1.23233	158	28	0.0762943	3.89933e+141	Arr2,rdgB,eag,Obp57c,spoon,Dyrk2,Obp19d,pros,CG4612,futsch,tko,wtrw,cry,Stat92E,me31B,inaD,inaC,Phm,Scamp,ct,mri,Arr1,ClC-b,Pink1,nAChRbeta2,t,Obp44a,Tpi
GO:0060997	dendritic spine morphogenesis	0.292913	-1.22788	2	1	0.0027248	33981	smt3
GO:1904377	positive regulation of protein localization to cell periphery	0.292913	-1.22788	2	1	0.0027248	33981	smt3
GO:0006555	methionine metabolic process	0.292913	-1.22788	2	1	0.0027248	326189	Adi1
GO:0042572	retinol metabolic process	0.292913	-1.22788	2	1	0.0027248	39812	Pdh
GO:0006277	DNA amplification	0.292913	-1.22788	2	1	0.0027248	42550	E2f1
GO:0060288	formation of a compartment boundary	0.292913	-1.22788	2	1	0.0027248	44540	ct
GO:0046692	sperm competition	0.292913	-1.22788	2	1	0.0027248	39392	Est-6
GO:0015744	succinate transport	0.292913	-1.22788	2	1	0.0027248	40049	Indy
GO:0034553	mitochondrial respiratory chain complex II assembly	0.292913	-1.22788	2	1	0.0027248	34089	Sirup
GO:0007320	insemination	0.292913	-1.22788	2	1	0.0027248	39392	Est-6
GO:1902626	assembly of large subunit precursor of preribosome	0.292913	-1.22788	2	1	0.0027248	41372	RpL24-like
GO:0099509	regulation of presynaptic cytosolic calcium ion concentration	0.292913	-1.22788	2	1	0.0027248	36905	Cbp53E
GO:0043967	histone H4 acetylation	0.292913	-1.22788	2	1	0.0027248	32318	tth
GO:0007216	G protein-coupled glutamate receptor signaling pathway	0.292913	-1.22788	2	1	0.0027248	33944	homer
GO:0043457	regulation of cellular respiration	0.292913	-1.22788	2	1	0.0027248	31607	Pink1
GO:0015108	chloride transmembrane transporter activity	0.292913	-1.22788	2	1	0.0027248	36381	ClC-b
GO:0097150	neuronal stem cell population maintenance	0.292913	-1.22788	2	1	0.0027248	45368	Treh
GO:0045745	positive regulation of G protein-coupled receptor signaling pathway	0.292913	-1.22788	2	1	0.0027248	44046	sun
GO:0033499	galactose catabolic process via UDP-galactose	0.292913	-1.22788	2	1	0.0027248	33935	Galt
GO:0006767	water-soluble vitamin metabolic process	0.292913	-1.22788	2	1	0.0027248	31857	CG12118
GO:0006627	protein processing involved in protein targeting to mitochondrion	0.292913	-1.22788	2	1	0.0027248	39846	UQCR-C2
GO:0097061	dendritic spine organization	0.292913	-1.22788	2	1	0.0027248	33981	smt3
GO:0045849	negative regulation of nurse cell apoptotic process	0.292913	-1.22788	2	1	0.0027248	41260	Bruce
GO:0110011	regulation of basement membrane organization	0.292913	-1.22788	2	1	0.0027248	33025	Rab10
GO:0006991	response to sterol depletion	0.292913	-1.22788	2	1	0.0027248	40155	SREBP
GO:0010841	positive regulation of circadian sleep/wake cycle, wakefulness	0.292913	-1.22788	2	1	0.0027248	34181	Dh31
GO:0035321	maintenance of imaginal disc-derived wing hair orientation	0.292913	-1.22788	2	1	0.0027248	44205	spen
GO:0033962	cytoplasmic mRNA processing body assembly	0.292913	-1.22788	2	1	0.0027248	34364	me31B
GO:0048104	establishment of body hair or bristle planar orientation	0.292913	-1.22788	2	1	0.0027248	44205	spen
GO:0051793	medium-chain fatty acid catabolic process	0.292913	-1.22788	2	1	0.0027248	33532	Hydr2
GO:0030388	fructose 1,6-bisphosphate metabolic process	0.292913	-1.22788	2	1	0.0027248	35265	fbp
GO:0032374	regulation of cholesterol transport	0.292913	-1.22788	2	1	0.0027248	34358	Npc1a
GO:0007589	body fluid secretion	0.292913	-1.22788	2	1	0.0027248	34181	Dh31
GO:0051966	regulation of synaptic transmission, glutamatergic	0.292913	-1.22788	2	1	0.0027248	36589	Ih
GO:0034116	positive regulation of heterotypic cell-cell adhesion	0.292913	-1.22788	2	1	0.0027248	40464	Ten-m
GO:0048058	compound eye corneal lens development	0.292913	-1.22788	2	1	0.0027248	40464	Ten-m
GO:0032933	SREBP signaling pathway	0.292913	-1.22788	2	1	0.0027248	40155	SREBP
GO:0018065	protein-cofactor linkage	0.292913	-1.22788	2	1	0.0027248	46140	l(3)02640
GO:0033183	negative regulation of histone ubiquitination	0.292913	-1.22788	2	1	0.0027248	41181	hyd
GO:0072175	epithelial tube formation	0.292913	-1.22788	2	1	0.0027248	44540	ct
GO:0071422	succinate transmembrane transport	0.292913	-1.22788	2	1	0.0027248	40049	Indy
GO:0072321	chaperone-mediated protein transport	0.292913	-1.22788	2	1	0.0027248	4379884	CG34132
GO:1903580	positive regulation of ATP metabolic process	0.292913	-1.22788	2	1	0.0027248	33461	Pgk
GO:0004385	guanylate kinase activity	0.292913	-1.22788	2	1	0.0027248	32083	dlg1
GO:0006528	asparagine metabolic process	0.292913	-1.22788	2	1	0.0027248	36040	TER94
GO:0046470	phosphatidylcholine metabolic process	0.292913	-1.22788	2	1	0.0027248	35417	CG2201
GO:0051590	positive regulation of neurotransmitter transport	0.292913	-1.22788	2	1	0.0027248	35051	BicD
GO:0034982	mitochondrial protein processing	0.292913	-1.22788	2	1	0.0027248	39846	UQCR-C2
GO:0071501	cellular response to sterol depletion	0.292913	-1.22788	2	1	0.0027248	40155	SREBP
GO:0060191	regulation of lipase activity	0.292913	-1.22788	2	1	0.0027248	40148	Gbeta76C
GO:0006275	regulation of DNA replication	0.292913	-1.22788	2	1	0.0027248	42550	E2f1
GO:0051208	sequestering of calcium ion	0.292913	-1.22788	2	1	0.0027248	41474	Cpn
GO:0007418	ventral midline development	0.292913	-1.22788	2	1	0.0027248	45278	csw
GO:0010517	regulation of phospholipase activity	0.292913	-1.22788	2	1	0.0027248	40148	Gbeta76C
GO:0006740	NADPH regeneration	0.292913	-1.22788	2	1	0.0027248	37804	Taldo
GO:0060439	trachea morphogenesis	0.292913	-1.22788	2	1	0.0027248	41876	Ccm3
GO:0097696	receptor signaling pathway via STAT	0.292913	-1.22788	2	1	0.0027248	42428	Stat92E
GO:0110010	basolateral protein secretion	0.292913	-1.22788	2	1	0.0027248	33025	Rab10
GO:0006047	UDP-N-acetylglucosamine metabolic process	0.292913	-1.22788	2	1	0.0027248	3354921	Gfat1
GO:0051792	medium-chain fatty acid biosynthetic process	0.292913	-1.22788	2	1	0.0027248	33532	Hydr2
GO:0060047	heart contraction	0.292913	-1.22788	2	1	0.0027248	32314	up
GO:0055089	fatty acid homeostasis	0.292913	-1.22788	2	1	0.0027248	40155	SREBP
GO:0060041	retina development in camera-type eye	0.292913	-1.22788	2	1	0.0027248	34089	Sirup
GO:2000637	positive regulation of gene silencing by miRNA	0.292913	-1.22788	2	1	0.0027248	34364	me31B
GO:0016320	endoplasmic reticulum membrane fusion	0.292913	-1.22788	2	1	0.0027248	36040	TER94
GO:0106027	neuron projection organization	0.292913	-1.22788	2	1	0.0027248	33981	smt3
GO:0060193	positive regulation of lipase activity	0.292913	-1.22788	2	1	0.0027248	40148	Gbeta76C
GO:0007202	activation of phospholipase C activity	0.292913	-1.22788	2	1	0.0027248	40148	Gbeta76C
GO:0009749	response to glucose	0.292913	-1.22788	2	1	0.0027248	39150	Ilp2
GO:0015746	citrate transport	0.292913	-1.22788	2	1	0.0027248	40049	Indy
GO:0006506	GPI anchor biosynthetic process	0.292913	-1.22788	2	1	0.0027248	32909	CG7990
GO:0003407	neural retina development	0.292913	-1.22788	2	1	0.0027248	34089	Sirup
GO:0009588	UV-A, blue light phototransduction	0.292913	-1.22788	2	1	0.0027248	42305	cry
GO:1903391	regulation of adherens junction organization	0.292913	-1.22788	2	1	0.0027248	38534	Cip4
GO:0010636	positive regulation of mitochondrial fusion	0.292913	-1.22788	2	1	0.0027248	31581	Marf
GO:0098734	macromolecule depalmitoylation	0.292913	-1.22788	2	1	0.0027248	59176	CG18815
GO:0042219	cellular modified amino acid catabolic process	0.292913	-1.22788	2	1	0.0027248	37989	Tina-1
GO:0043027	cysteine-type endopeptidase inhibitor activity involved in apoptotic process	0.292913	-1.22788	2	1	0.0027248	39753	Diap1
GO:0048139	female germ-line cyst encapsulation	0.292913	-1.22788	2	1	0.0027248	38534	Cip4
GO:0034114	regulation of heterotypic cell-cell adhesion	0.292913	-1.22788	2	1	0.0027248	40464	Ten-m
GO:0009415	response to water	0.292913	-1.22788	2	1	0.0027248	40931	wtrw
GO:0022600	digestive system process	0.292913	-1.22788	2	1	0.0027248	39454	Atg1
GO:0010863	positive regulation of phospholipase C activity	0.292913	-1.22788	2	1	0.0027248	40148	Gbeta76C
GO:0008015	blood circulation	0.292913	-1.22788	2	1	0.0027248	32314	up
GO:0045472	response to ether	0.292913	-1.22788	2	1	0.0027248	32428	eag
GO:0090329	regulation of DNA-dependent DNA replication	0.292913	-1.22788	2	1	0.0027248	42550	E2f1
GO:0045838	positive regulation of membrane potential	0.292913	-1.22788	2	1	0.0027248	36583	Hsc70-5
GO:1903018	regulation of glycoprotein metabolic process	0.292913	-1.22788	2	1	0.0027248	33260	CG3662
GO:1903307	positive regulation of regulated secretory pathway	0.292913	-1.22788	2	1	0.0027248	35051	BicD
GO:0019388	galactose catabolic process	0.292913	-1.22788	2	1	0.0027248	33935	Galt
GO:0006642	triglyceride mobilization	0.292913	-1.22788	2	1	0.0027248	39611	bmm
GO:0045104	intermediate filament cytoskeleton organization	0.292913	-1.22788	2	1	0.0027248	5740544	futsch
GO:0006656	phosphatidylcholine biosynthetic process	0.292913	-1.22788	2	1	0.0027248	35417	CG2201
GO:0061059	positive regulation of peptidoglycan recognition protein signaling pathway	0.292913	-1.22788	2	1	0.0027248	36183	Listericin
GO:0060996	dendritic spine development	0.292913	-1.22788	2	1	0.0027248	33981	smt3
GO:0035171	lamellocyte differentiation	0.292913	-1.22788	2	1	0.0027248	42428	Stat92E
GO:0010840	regulation of circadian sleep/wake cycle, wakefulness	0.292913	-1.22788	2	1	0.0027248	34181	Dh31
GO:0010559	regulation of glycoprotein biosynthetic process	0.292913	-1.22788	2	1	0.0027248	33260	CG3662
GO:0010797	regulation of multivesicular body size involved in endosome transport	0.292913	-1.22788	2	1	0.0027248	38418	kst
GO:0015141	succinate transmembrane transporter activity	0.292913	-1.22788	2	1	0.0027248	40049	Indy
GO:1903076	regulation of protein localization to plasma membrane	0.292913	-1.22788	2	1	0.0027248	33981	smt3
GO:1904746	negative regulation of apoptotic process involved in development	0.292913	-1.22788	2	1	0.0027248	41260	Bruce
GO:0010796	regulation of multivesicular body size	0.292913	-1.22788	2	1	0.0027248	38418	kst
GO:0000741	karyogamy	0.292913	-1.22788	2	1	0.0027248	40589	tacc
GO:0016973	poly(A)+ mRNA export from nucleus	0.292913	-1.22788	2	1	0.0027248	3354919	Dbp80
GO:0006842	tricarboxylic acid transport	0.292913	-1.22788	2	1	0.0027248	40049	Indy
GO:1905268	negative regulation of chromatin organization	0.292913	-1.22788	2	1	0.0027248	41181	hyd
GO:0060148	positive regulation of posttranscriptional gene silencing	0.292913	-1.22788	2	1	0.0027248	34364	me31B
GO:0034587	piRNA metabolic process	0.292913	-1.22788	2	1	0.0027248	43350	mino
GO:1990001	inhibition of cysteine-type endopeptidase activity involved in apoptotic process	0.292913	-1.22788	2	1	0.0027248	39753	Diap1
GO:1990386	mitotic cleavage furrow ingression	0.292913	-1.22788	2	1	0.0027248	40506	Arf79F
GO:2000289	regulation of photoreceptor cell axon guidance	0.292913	-1.22788	2	1	0.0027248	32400	NetB
GO:0004103	choline kinase activity	0.292913	-1.22788	2	1	0.0027248	35417	CG2201
GO:1902915	negative regulation of protein polyubiquitination	0.292913	-1.22788	2	1	0.0027248	41181	hyd
GO:0046710	GDP metabolic process	0.292913	-1.22788	2	1	0.0027248	32083	dlg1
GO:0051126	negative regulation of actin nucleation	0.292913	-1.22788	2	1	0.0027248	38534	Cip4
GO:0007307	eggshell chorion gene amplification	0.292913	-1.22788	2	1	0.0027248	42550	E2f1
GO:0042574	retinal metabolic process	0.292913	-1.22788	2	1	0.0027248	39812	Pdh
GO:0006697	ecdysone biosynthetic process	0.292913	-1.22788	2	1	0.0027248	31581	Marf
GO:0045103	intermediate filament-based process	0.292913	-1.22788	2	1	0.0027248	5740544	futsch
GO:0009086	methionine biosynthetic process	0.292913	-1.22788	2	1	0.0027248	326189	Adi1
GO:0061964	negative regulation of entry into reproductive diapause	0.292913	-1.22788	2	1	0.0027248	39150	Ilp2
GO:0006415	translational termination	0.292913	-1.22788	2	1	0.0027248	40240	eRF1
GO:0043010	camera-type eye development	0.292913	-1.22788	2	1	0.0027248	34089	Sirup
GO:0030708	germarium-derived female germ-line cyst encapsulation	0.292913	-1.22788	2	1	0.0027248	38534	Cip4
GO:0006013	mannose metabolic process	0.292913	-1.22788	2	1	0.0027248	41913	alpha-Man-IIb
GO:0032511	late endosome to vacuole transport via multivesicular body sorting pathway	0.292913	-1.22788	2	1	0.0027248	38529	CG15012
GO:0006941	striated muscle contraction	0.292913	-1.22788	2	1	0.0027248	32314	up
GO:0032528	microvillus organization	0.292913	-1.22788	2	1	0.0027248	31717	sn
GO:0006939	smooth muscle contraction	0.292913	-1.22788	2	1	0.0027248	38490	Chd64
GO:0046693	sperm storage	0.292913	-1.22788	2	1	0.0027248	39392	Est-6
GO:1901314	regulation of histone H2A K63-linked ubiquitination	0.292913	-1.22788	2	1	0.0027248	41181	hyd
GO:0040009	regulation of growth rate	0.292913	-1.22788	2	1	0.0027248	39150	Ilp2
GO:2001251	negative regulation of chromosome organization	0.292913	-1.22788	2	1	0.0027248	41181	hyd
GO:0006098	pentose-phosphate shunt	0.292913	-1.22788	2	1	0.0027248	37804	Taldo
GO:1904375	regulation of protein localization to cell periphery	0.292913	-1.22788	2	1	0.0027248	33981	smt3
GO:0046039	GTP metabolic process	0.292913	-1.22788	2	1	0.0027248	43739	awd
GO:0034552	respiratory chain complex II assembly	0.292913	-1.22788	2	1	0.0027248	34089	Sirup
GO:0007259	receptor signaling pathway via JAK-STAT	0.292913	-1.22788	2	1	0.0027248	42428	Stat92E
GO:0009052	pentose-phosphate shunt, non-oxidative branch	0.292913	-1.22788	2	1	0.0027248	37804	Taldo
GO:0007215	glutamate receptor signaling pathway	0.292913	-1.22788	2	1	0.0027248	33944	homer
GO:1900045	negative regulation of protein K63-linked ubiquitination	0.292913	-1.22788	2	1	0.0027248	41181	hyd
GO:0035601	protein deacylation	0.292913	-1.22788	2	1	0.0027248	59176	CG18815
GO:0050771	negative regulation of axonogenesis	0.292913	-1.22788	2	1	0.0027248	41363	pros
GO:0043525	positive regulation of neuron apoptotic process	0.292913	-1.22788	2	1	0.0027248	36040	TER94
GO:0070071	proton-transporting two-sector ATPase complex assembly	0.292913	-1.22788	2	1	0.0027248	42020	CG10340
GO:0006012	galactose metabolic process	0.292913	-1.22788	2	1	0.0027248	33935	Galt
GO:0009746	response to hexose	0.292913	-1.22788	2	1	0.0027248	39150	Ilp2
GO:0060384	innervation	0.292913	-1.22788	2	1	0.0027248	41363	pros
GO:0008359	regulation of bicoid mRNA localization	0.292913	-1.22788	2	1	0.0027248	42743	cnc
GO:0048644	muscle organ morphogenesis	0.292913	-1.22788	2	1	0.0027248	32314	up
GO:0060323	head morphogenesis	0.292913	-1.22788	2	1	0.0027248	40517	alpha-Cat
GO:0051791	medium-chain fatty acid metabolic process	0.292913	-1.22788	2	1	0.0027248	33532	Hydr2
GO:0043154	negative regulation of cysteine-type endopeptidase activity involved in apoptotic process	0.292913	-1.22788	2	1	0.0027248	39753	Diap1
GO:0032954	regulation of cytokinetic process	0.292913	-1.22788	2	1	0.0027248	44289	flw
GO:0007344	pronuclear fusion	0.292913	-1.22788	2	1	0.0027248	40589	tacc
GO:0032371	regulation of sterol transport	0.292913	-1.22788	2	1	0.0027248	34358	Npc1a
GO:0120033	negative regulation of plasma membrane bounded cell projection assembly	0.292913	-1.22788	2	1	0.0027248	37387	cpa
GO:0001956	positive regulation of neurotransmitter secretion	0.292913	-1.22788	2	1	0.0027248	35051	BicD
GO:0010633	negative regulation of epithelial cell migration	0.292913	-1.22788	2	1	0.0027248	38059	Ptpmeg
GO:0003009	skeletal muscle contraction	0.292913	-1.22788	2	1	0.0027248	32314	up
GO:0019217	regulation of fatty acid metabolic process	0.292913	-1.22788	2	1	0.0027248	40155	SREBP
GO:1900044	regulation of protein K63-linked ubiquitination	0.292913	-1.22788	2	1	0.0027248	41181	hyd
GO:0021954	central nervous system neuron development	0.292913	-1.22788	2	1	0.0027248	33981	smt3
GO:0006505	GPI anchor metabolic process	0.292913	-1.22788	2	1	0.0027248	32909	CG7990
GO:0046596	regulation of viral entry into host cell	0.292913	-1.22788	2	1	0.0027248	36040	TER94
GO:1901315	negative regulation of histone H2A K63-linked ubiquitination	0.292913	-1.22788	2	1	0.0027248	41181	hyd
GO:0045035	sensory organ precursor cell division	0.292913	-1.22788	2	1	0.0027248	39753	Diap1
GO:0000097	sulfur amino acid biosynthetic process	0.292913	-1.22788	2	1	0.0027248	326189	Adi1
GO:0000338	protein deneddylation	0.292913	-1.22788	2	1	0.0027248	36339	Den1
GO:0031057	negative regulation of histone modification	0.292913	-1.22788	2	1	0.0027248	41181	hyd
GO:0006585	dopamine biosynthetic process from tyrosine	0.292913	-1.22788	2	1	0.0027248	38746	ple
GO:0010518	positive regulation of phospholipase activity	0.292913	-1.22788	2	1	0.0027248	40148	Gbeta76C
GO:0055081	anion homeostasis	0.292913	-1.22788	2	1	0.0027248	40155	SREBP
GO:0030277	maintenance of gastrointestinal epithelium	0.292913	-1.22788	2	1	0.0027248	39454	Atg1
GO:0055060	asymmetric neuroblast division resulting in ganglion mother cell formation	0.292913	-1.22788	2	1	0.0027248	41363	pros
GO:0051036	regulation of endosome size	0.292913	-1.22788	2	1	0.0027248	38418	kst
GO:0034063	stress granule assembly	0.292913	-1.22788	2	1	0.0027248	34364	me31B
GO:0046598	positive regulation of viral entry into host cell	0.292913	-1.22788	2	1	0.0027248	36040	TER94
GO:0006183	GTP biosynthetic process	0.292913	-1.22788	2	1	0.0027248	43739	awd
GO:0006188	IMP biosynthetic process	0.292913	-1.22788	2	1	0.0027248	42973	CG11089
GO:0033182	regulation of histone ubiquitination	0.292913	-1.22788	2	1	0.0027248	41181	hyd
GO:0051016	barbed-end actin filament capping	0.292913	-1.22788	2	1	0.0027248	37387	cpa
GO:0034110	regulation of homotypic cell-cell adhesion	0.292913	-1.22788	2	1	0.0027248	40464	Ten-m
GO:0006531	aspartate metabolic process	0.292913	-1.22788	2	1	0.0027248	36782	Got1
GO:1904502	regulation of lipophagy	0.292913	-1.22788	2	1	0.0027248	117332	Rheb
GO:0006646	phosphatidylethanolamine biosynthetic process	0.292913	-1.22788	2	1	0.0027248	35417	CG2201
GO:0021953	central nervous system neuron differentiation	0.292913	-1.22788	2	1	0.0027248	33981	smt3
GO:0030237	female sex determination	0.292913	-1.22788	2	1	0.0027248	31442	snf
GO:0060729	intestinal epithelial structure maintenance	0.292913	-1.22788	2	1	0.0027248	39454	Atg1
GO:1905207	regulation of cardiocyte differentiation	0.292913	-1.22788	2	1	0.0027248	38846	lqf
GO:0031397	negative regulation of protein ubiquitination	0.292913	-1.22788	2	1	0.0027248	41181	hyd
GO:1905153	regulation of membrane invagination	0.292913	-1.22788	2	1	0.0027248	33219	crq
GO:0008053	mitochondrial fusion	0.292913	-1.22788	2	1	0.0027248	31581	Marf
GO:0006833	water transport	0.292913	-1.22788	2	1	0.0027248	41428	ClC-a
GO:0006657	CDP-choline pathway	0.292913	-1.22788	2	1	0.0027248	35417	CG2201
GO:0048150	behavioral response to ether	0.292913	-1.22788	2	1	0.0027248	32428	eag
GO:0042766	nucleosome mobilization	0.292913	-1.22788	2	1	0.0027248	37922	Nurf-38
GO:0048085	adult chitin-containing cuticle pigmentation	0.292913	-1.22788	2	1	0.0027248	38746	ple
GO:1903078	positive regulation of protein localization to plasma membrane	0.292913	-1.22788	2	1	0.0027248	33981	smt3
GO:0046835	carbohydrate phosphorylation	0.292913	-1.22788	2	1	0.0027248	32938	Pfrx
GO:2000766	negative regulation of cytoplasmic translation	0.292913	-1.22788	2	1	0.0027248	34364	me31B
GO:1900274	regulation of phospholipase C activity	0.292913	-1.22788	2	1	0.0027248	40148	Gbeta76C
GO:0007586	digestion	0.292913	-1.22788	2	1	0.0027248	39454	Atg1
GO:0060099	regulation of phagocytosis, engulfment	0.292913	-1.22788	2	1	0.0027248	33219	crq
GO:0045321	leukocyte activation	0.292913	-1.22788	2	1	0.0027248	33219	crq
GO:0034284	response to monosaccharide	0.292913	-1.22788	2	1	0.0027248	39150	Ilp2
GO:0030714	anterior/posterior axis specification, follicular epithelium	0.292913	-1.22788	2	1	0.0027248	32083	dlg1
GO:0051302	regulation of cell division	0.295574	-1.21884	12	3	0.00817439	412603334344289	Bruce,chinmo,flw
GO:0008286	insulin receptor signaling pathway	0.295574	-1.21884	12	3	0.00817439	1173323915031220	Rheb,Ilp2,Ilp6
GO:0008103	oocyte microtubule cytoskeleton polarization	0.295574	-1.21884	12	3	0.00817439	427433505142186	cnc,BicD,14-3-3epsilon
GO:0031110	regulation of microtubule polymerization or depolymerization	0.295574	-1.21884	12	3	0.00817439	4.13924e+16	Jupiter,tacc,futsch
GO:0035069	larval midgut histolysis	0.295574	-1.21884	12	3	0.00817439	394543938336040	Atg1,Atg12,TER94
GO:0010453	regulation of cell fate commitment	0.295574	-1.21884	12	3	0.00817439	413633884643481	pros,lqf,alph
GO:0008406	gonad development	0.295574	-1.21884	12	3	0.00817439	368974118144540	inaC,hyd,ct
GO:0007009	plasma membrane organization	0.295574	-1.21884	12	3	0.00817439	385344335038418	Cip4,mino,kst
GO:0045137	development of primary sexual characteristics	0.295574	-1.21884	12	3	0.00817439	368974118144540	inaC,hyd,ct
GO:0009725	response to hormone	0.297559	-1.21214	40	8	0.0217984	3.35324e+40	Hydr2,Chd64,PyK,Ilp6,Nurf-38,Rheb,Ilp2,Rab10
GO:0072091	regulation of stem cell proliferation	0.297863	-1.21112	23	5	0.013624	4.13634e+24	pros,COX5A,CG7834,UQCR-14,CG5214
GO:0030097	hemopoiesis	0.297863	-1.21112	23	5	0.013624	4.35324e+24	RpS8,Stat92E,sn,Rac2,E2f1
GO:0022416	chaeta development	0.297863	-1.21112	23	5	0.013624	3.17173e+24	sn,ctp,spen,Ten-m,Diap1
GO:0030833	regulation of actin filament polymerization	0.297863	-1.21112	23	5	0.013624	3.33433e+26	chinmo,conu,cpa,spoon,Cip4
GO:0009100	glycoprotein metabolic process	0.297863	-1.21112	23	5	0.013624	3.85284e+26	Hexo1,alpha-Man-IIb,alpha-Man-Ia,Gfat1,ninaA
GO:0048284	organelle fusion	0.297863	-1.21112	23	5	0.013624	4.28544e+24	Syx1A,Vamp7,TER94,tacc,Marf
GO:1903429	regulation of cell maturation	0.297863	-1.21112	23	5	0.013624	4.28544e+24	Syx1A,cnc,ctp,TER94,Arf79F
GO:0031114	regulation of microtubule depolymerization	0.308846	-1.17491	7	2	0.00544959	574054440589	futsch,tacc
GO:0043401	steroid hormone mediated signaling pathway	0.308846	-1.17491	7	2	0.00544959	3353237922	Hydr2,Nurf-38
GO:0072527	pyrimidine-containing compound metabolic process	0.308846	-1.17491	7	2	0.00544959	4373939396	awd,Adk1
GO:0042181	ketone biosynthetic process	0.308846	-1.17491	7	2	0.00544959	3158134358	Marf,Npc1a
GO:0016057	regulation of membrane potential in photoreceptor cell	0.308846	-1.17491	7	2	0.00544959	867411436589	inaF-B,Ih
GO:0004713	protein tyrosine kinase activity	0.308846	-1.17491	7	2	0.00544959	4111841398	FER,Csk
GO:0048545	response to steroid hormone	0.308846	-1.17491	7	2	0.00544959	3353237922	Hydr2,Nurf-38
GO:0061912	selective autophagy	0.308846	-1.17491	7	2	0.00544959	3945439383	Atg1,Atg12
GO:0002764	immune response-regulating signaling pathway	0.308846	-1.17491	7	2	0.00544959	3883133219	Rac2,crq
GO:0005984	disaccharide metabolic process	0.308846	-1.17491	7	2	0.00544959	4536835265	Treh,fbp
GO:0014042	positive regulation of neuron maturation	0.308846	-1.17491	7	2	0.00544959	4050631405	Arf79F,ctp
GO:0043242	negative regulation of protein complex disassembly	0.308846	-1.17491	7	2	0.00544959	4058937387	tacc,cpa
GO:0001895	retina homeostasis	0.308846	-1.17491	7	2	0.00544959	3899335078	Arr2,Arr1
GO:1901880	negative regulation of protein depolymerization	0.308846	-1.17491	7	2	0.00544959	3738740589	cpa,tacc
GO:0045752	positive regulation of Toll signaling pathway	0.308846	-1.17491	7	2	0.00544959	4282133981	Pli,smt3
GO:0006123	mitochondrial electron transport, cytochrome c to oxygen	0.308846	-1.17491	7	2	0.00544959	4143246040	COX5A,cype
GO:0014016	neuroblast differentiation	0.308846	-1.17491	7	2	0.00544959	4136344205	pros,spen
GO:0010888	negative regulation of lipid storage	0.308846	-1.17491	7	2	0.00544959	3961144887	bmm,mdy
GO:0005326	neurotransmitter transmembrane transporter activity	0.308846	-1.17491	7	2	0.00544959	3404934048	CG13795,CG13794
GO:0042278	purine nucleoside metabolic process	0.308846	-1.17491	7	2	0.00544959	4373932083	awd,dlg1
GO:0047497	mitochondrion transport along microtubule	0.308846	-1.17491	7	2	0.00544959	3158131607	Marf,Pink1
GO:0071383	cellular response to steroid hormone stimulus	0.308846	-1.17491	7	2	0.00544959	3792233532	Nurf-38,Hydr2
GO:0019646	aerobic electron transport chain	0.308846	-1.17491	7	2	0.00544959	4143246040	COX5A,cype
GO:1904801	positive regulation of neuron remodeling	0.308846	-1.17491	7	2	0.00544959	4050631405	Arf79F,ctp
GO:0099173	postsynapse organization	0.308846	-1.17491	7	2	0.00544959	3398140464	smt3,Ten-m
GO:0046128	purine ribonucleoside metabolic process	0.308846	-1.17491	7	2	0.00544959	3208343739	dlg1,awd
GO:0034643	establishment of mitochondrion localization, microtubule-mediated	0.308846	-1.17491	7	2	0.00544959	3160731581	Pink1,Marf
GO:0060070	canonical Wnt signaling pathway	0.308846	-1.17491	7	2	0.00544959	4292244289	Pp1alpha-96A,flw
GO:0032465	regulation of cytokinesis	0.308846	-1.17491	7	2	0.00544959	4428941260	flw,Bruce
GO:1905953	negative regulation of lipid localization	0.308846	-1.17491	7	2	0.00544959	4488739611	mdy,bmm
GO:1903578	regulation of ATP metabolic process	0.308846	-1.17491	7	2	0.00544959	3346131607	Pgk,Pink1
GO:0046463	acylglycerol biosynthetic process	0.308846	-1.17491	7	2	0.00544959	4335044887	mino,mdy
GO:0070593	dendrite self-avoidance	0.308846	-1.17491	7	2	0.00544959	31884146015	Bsg,tutl
GO:0009119	ribonucleoside metabolic process	0.308846	-1.17491	7	2	0.00544959	3208343739	dlg1,awd
GO:0046460	neutral lipid biosynthetic process	0.308846	-1.17491	7	2	0.00544959	4335044887	mino,mdy
GO:0007394	dorsal closure, elongation of leading edge cells	0.308846	-1.17491	7	2	0.00544959	4111838831	FER,Rac2
GO:0051654	establishment of mitochondrion localization	0.308846	-1.17491	7	2	0.00544959	3158131607	Marf,Pink1
GO:0006694	steroid biosynthetic process	0.308846	-1.17491	7	2	0.00544959	3158134358	Marf,Npc1a
GO:0044772	mitotic cell cycle phase transition	0.308846	-1.17491	7	2	0.00544959	42550117332	E2f1,Rheb
GO:0044719	regulation of imaginal disc-derived wing size	0.308846	-1.17491	7	2	0.00544959	3651337823	CG6191,Phm
GO:0007306	eggshell chorion assembly	0.309385	-1.17317	29	6	0.0163488	3.14593e+29	spoon,smt3,E2f1,Rac2,gus,Pax
GO:0002682	regulation of immune system process	0.316923	-1.1491	76	14	0.0381471	4.29225e+69	Pp1alpha-96A,cpo,Pkc53E,me31B,Stat92E,smt3,crq,Nurf-38,E2f1,Rac2,Pli,Cyt-b5,Arf79F,Ide
GO:0045214	sarcomere organization	0.318579	-1.14388	18	4	0.0108992	3.23144e+20	up,Mlp60A,Bsg,bt
GO:0050953	sensory perception of light stimulus	0.318579	-1.14388	18	4	0.0108992	3.76294e+19	inaD,cry,inaC,t
GO:0045187	regulation of circadian sleep/wake cycle, sleep	0.318579	-1.14388	18	4	0.0108992	3.65894e+19	Ih,cry,homer,Fbxl4
GO:0048520	positive regulation of behavior	0.318579	-1.14388	18	4	0.0108992	3.16073e+19	Pink1,homer,Dh31,Ih
GO:0032101	regulation of response to external stimulus	0.318919	-1.14282	88	16	0.0435967	4.02484e+80	Ide,Arr1,smt3,inaC,inaD,Stat92E,me31B,Pp1alpha-96A,Listericin,Rheb,Pli,NetB,Gbeta76C,Fbxl4,Arr2,rdgB
GO:0060284	regulation of cell development	0.319246	-1.14179	136	24	0.0653951	4.27433e+120	cnc,me31B,tutl,TER94,mdy,UQCR-14,CG5214,E2f1,Ptpmeg,Syx1A,dlg1,Diap1,ctp,COX5A,Atg1,Bruce,alph,NetB,csw,pros,Rac2,Rheb,Arf79F,CG7834
GO:0060548	negative regulation of cell death	0.322876	-1.13049	41	8	0.0217984	3.97533e+41	Diap1,Pink1,futsch,csw,Idgf2,Bruce,Tango9,Prx3
GO:0016358	dendrite development	0.329935	-1.10886	53	10	0.027248	4.27433e+51	cnc,sn,NetB,smt3,TER94,pros,ct,CG6701,jim,futsch
GO:0046148	pigment biosynthetic process	0.331549	-1.10398	24	5	0.013624	3.32715e+24	ninaA,l(3)02640,Hexo1,alpha-Man-IIb,santa-maria
GO:0008064	regulation of actin polymerization or depolymerization	0.331549	-1.10398	24	5	0.013624	3.85343e+26	Cip4,spoon,chinmo,cpa,conu
GO:0030832	regulation of actin filament length	0.331549	-1.10398	24	5	0.013624	3.33433e+26	chinmo,conu,cpa,spoon,Cip4
GO:0099024	plasma membrane invagination	0.342672	-1.07098	13	3	0.00817439	405063321945278	Arf79F,crq,csw
GO:0007294	germarium-derived oocyte fate determination	0.342672	-1.07098	13	3	0.00817439	421863738735051	14-3-3epsilon,cpa,BicD
GO:0046329	negative regulation of JNK cascade	0.342672	-1.07098	13	3	0.00817439	373874348144289	cpa,alph,flw
GO:0015893	drug transport	0.342672	-1.07098	13	3	0.00817439	400493138041930	Indy,CG3556,glob1
GO:0009411	response to UV	0.342672	-1.07098	13	3	0.00817439	502274218643481	CG17059,14-3-3epsilon,alph
GO:0010324	membrane invagination	0.342672	-1.07098	13	3	0.00817439	405063321945278	Arf79F,crq,csw
GO:0032873	negative regulation of stress-activated MAPK cascade	0.342672	-1.07098	13	3	0.00817439	442894348137387	flw,alph,cpa
GO:0070303	negative regulation of stress-activated protein kinase signaling cascade	0.342672	-1.07098	13	3	0.00817439	442894348137387	flw,alph,cpa
GO:0071826	ribonucleoprotein complex subunit organization	0.34497	-1.0643	36	7	0.0190736	3.44123e+34	mRpS7,me31B,RpL3,RpL6,RpL24-like,RpS15,RpL12
GO:0045017	glycerolipid biosynthetic process	0.35758	-1.0284	19	4	0.0108992	4.33504e+19	mino,mdy,CG2201,CG7990
GO:1990542	mitochondrial transmembrane transport	0.35758	-1.0284	19	4	0.0108992	4.38293e+19	ATPsynbeta,CG8206,Tom40,Tom20
GO:0043933	protein-containing complex subunit organization	0.359323	-1.02353	151	26	0.0708447	3.60154e+129	Vamp7,Tbce,Nurf-38,Nap1,UQCR-14,ND-23,RpL24-like,TER94,eRF1,me31B,ND-B12,Pp1alpha-96A,COX6B,TfIIA-S,RpL3,bt,RpS15,flw,RpL12,CG10340,RpL6,eag,Sirup,mRpS7,gammaSnap1,Tom20
GO:0048534	hematopoietic or lymphoid organ development	0.365564	-1.00631	25	5	0.013624	4.35324e+24	RpS8,Stat92E,sn,E2f1,Rac2
GO:0048871	multicellular organismal homeostasis	0.365564	-1.00631	25	5	0.013624	3.94544e+24	Atg1,Arr1,ClC-a,Csk,Arr2
GO:0002520	immune system development	0.365564	-1.00631	25	5	0.013624	4.35324e+24	RpS8,E2f1,Rac2,sn,Stat92E
GO:0071417	cellular response to organonitrogen compound	0.365564	-1.00631	25	5	0.013624	3.30254e+25	Rab10,PyK,Ilp6,Rheb,Ilp2
GO:0030239	myofibril assembly	0.365564	-1.00631	25	5	0.013624	3.23144e+25	up,Mlp60A,Bsg,bt,Prm
GO:1901699	cellular response to nitrogen compound	0.365564	-1.00631	25	5	0.013624	4.26203e+25	PyK,Ilp6,Rheb,Ilp2,Rab10
GO:0034622	cellular protein-containing complex assembly	0.368435	-0.998491	109	19	0.0517711	3.25864e+94	UQCR-14,Nap1,RpL24-like,ND-23,ND-B12,me31B,Tbce,RpL6,RpS15,RpL12,CG10340,Sirup,gammaSnap1,mRpS7,Tom20,TfIIA-S,RpL3,COX6B,bt
GO:0033043	regulation of organelle organization	0.368435	-0.998491	109	19	0.0517711	4.11814e+98	hyd,Tango9,Stat92E,Jupiter,CG8036,conu,SREBP,Pink1,Cip4,14-3-3epsilon,tacc,Marf,flw,spoon,cpa,chinmo,jim,futsch,mamo
GO:0010623	programmed cell death involved in cell development	0.370194	-0.993727	31	6	0.0163488	3.93834e+29	Atg12,TER94,Pink1,Atg1,E2f1,ctp
GO:0034660	ncRNA metabolic process	0.370194	-0.993727	31	6	0.0163488	3.15884e+29	RpL7A,RpS8,mino,RpL35,CG4364,RpL10Ab
GO:0007018	microtubule-based movement	0.370194	-0.993727	31	6	0.0163488	3.14054e+31	ctp,cpa,Atg1,Marf,Pink1,futsch
GO:0009251	glucan catabolic process	0.371592	-0.989958	8	2	0.00544959	3938339454	Atg12,Atg1
GO:1903431	positive regulation of cell maturation	0.371592	-0.989958	8	2	0.00544959	4050631405	Arf79F,ctp
GO:0050878	regulation of body fluid levels	0.371592	-0.989958	8	2	0.00544959	3418141428	Dh31,ClC-a
GO:0034334	adherens junction maintenance	0.371592	-0.989958	8	2	0.00544959	3883141398	Rac2,Csk
GO:0009167	purine ribonucleoside monophosphate metabolic process	0.371592	-0.989958	8	2	0.00544959	4297332083	CG11089,dlg1
GO:0044770	cell cycle phase transition	0.371592	-0.989958	8	2	0.00544959	42550117332	E2f1,Rheb
GO:0097352	autophagosome maturation	0.371592	-0.989958	8	2	0.00544959	3601536040	Vamp7,TER94
GO:0009311	oligosaccharide metabolic process	0.371592	-0.989958	8	2	0.00544959	3526545368	fbp,Treh
GO:0009126	purine nucleoside monophosphate metabolic process	0.371592	-0.989958	8	2	0.00544959	3208342973	dlg1,CG11089
GO:0005980	glycogen catabolic process	0.371592	-0.989958	8	2	0.00544959	3938339454	Atg12,Atg1
GO:2000331	regulation of terminal button organization	0.371592	-0.989958	8	2	0.00544959	3945440464	Atg1,Ten-m
GO:0072593	reactive oxygen species metabolic process	0.371592	-0.989958	8	2	0.00544959	4210938378	Prx3,ND-30
GO:0051705	multi-organism behavior	0.371592	-0.989958	8	2	0.00544959	3666438831	Cyp6a20,Rac2
GO:0035332	positive regulation of hippo signaling	0.371592	-0.989958	8	2	0.00544959	4139842186	Csk,14-3-3epsilon
GO:0050764	regulation of phagocytosis	0.371592	-0.989958	8	2	0.00544959	3321936381	crq,ClC-b
GO:0016999	antibiotic metabolic process	0.371592	-0.989958	8	2	0.00544959	421093771877	Prx3,Adh
GO:0051028	mRNA transport	0.371592	-0.989958	8	2	0.00544959	335491935051	Dbp80,BicD
GO:0045676	regulation of R7 cell differentiation	0.371592	-0.989958	8	2	0.00544959	4136343481	pros,alph
GO:0045475	locomotor rhythm	0.372938	-0.986344	37	7	0.0190736	3.60413e+34	Pka-R2,dlg1,qsm,cu,Ilp2,cry,Ih
GO:0016311	dephosphorylation	0.375319	-0.97998	49	9	0.0245232	3.25894e+44	CG3632,Ptpmeg,alph,flw,csw,CG6656,Ipp,Pp1alpha-96A,CG12237
GO:0043900	regulation of multi-organism process	0.388159	-0.946341	98	17	0.0463215	4.27434e+84	cnc,Pp1alpha-96A,me31B,Stat92E,mdy,TER94,smt3,E2f1,Syx1A,Ptpmeg,Ide,Diap1,dlg1,Bruce,Atg1,Pli,Listericin
GO:0045727	positive regulation of translation	0.389501	-0.942888	14	3	0.00817439	3791439108117330	CG4612,RpS9,Rheb
GO:0007097	nuclear migration	0.389501	-0.942888	14	3	0.00817439	405894428935051	tacc,flw,BicD
GO:0042274	ribosomal small subunit biogenesis	0.389501	-0.942888	14	3	0.00817439	344124353236851	mRpS7,RpS8,RpS15
GO:0060281	regulation of oocyte development	0.389501	-0.942888	14	3	0.00817439	360404285442743	TER94,Syx1A,cnc
GO:0030716	oocyte fate determination	0.389501	-0.942888	14	3	0.00817439	421863738735051	14-3-3epsilon,cpa,BicD
GO:0030706	germarium-derived oocyte differentiation	0.389501	-0.942888	14	3	0.00817439	350513738742186	BicD,cpa,14-3-3epsilon
GO:0048259	regulation of receptor-mediated endocytosis	0.389501	-0.942888	14	3	0.00817439	483113505136897	Pkc53E,BicD,inaC
GO:0007317	regulation of pole plasm oskar mRNA localization	0.389501	-0.942888	14	3	0.00817439	427434285436040	cnc,Syx1A,TER94
GO:0000302	response to reactive oxygen species	0.389501	-0.942888	14	3	0.00817439	387463408936447	ple,Sirup,GLaz
GO:0051241	negative regulation of multicellular organismal process	0.392994	-0.933962	80	14	0.0381471	3.20834e+69	dlg1,CG7834,Cip4,Diap1,Csk,pros,Ptpmeg,alph,lqf,UQCR-14,CG5214,Fbxl4,COX5A,Bruce
GO:0032006	regulation of TOR signaling	0.396545	-0.924967	20	4	0.0108992	1.17332e+20	Rheb,Atg1,chrb,E2f1
GO:0110053	regulation of actin filament organization	0.399633	-0.917208	26	5	0.013624	3.85343e+26	Cip4,spoon,chinmo,cpa,conu
GO:0006732	coenzyme metabolic process	0.399633	-0.917208	26	5	0.013624	3.60294e+26	CG1441,wat,CG17691,CG7920,pdgy
GO:0048813	dendrite morphogenesis	0.39976	-0.916891	50	9	0.0245232	4.27433e+46	cnc,NetB,TER94,smt3,pros,CG6701,ct,jim,futsch
GO:1901701	cellular response to oxygen-containing compound	0.39976	-0.916891	50	9	0.0245232	4.26204e+45	PyK,Nurf-38,Ilp6,Ilp2,Rheb,Rab10,Sirup,Stat92E,Pka-R2
GO:0060828	regulation of canonical Wnt signaling pathway	0.400844	-0.914183	32	6	0.0163488	4.42054e+29	spen,TER94,Diap1,flw,Pp1alpha-96A,hyd
GO:0007564	regulation of chitin-based cuticle tanning	0.405495	-0.902647	3	1	0.0027248	38746	ple
GO:0016101	diterpenoid metabolic process	0.405495	-0.902647	3	1	0.0027248	39812	Pdh
GO:0090151	establishment of protein localization to mitochondrial membrane	0.405495	-0.902647	3	1	0.0027248	4379884	CG34132
GO:0010847	regulation of chromatin assembly	0.405495	-0.902647	3	1	0.0027248	42428	Stat92E
GO:0031453	positive regulation of heterochromatin assembly	0.405495	-0.902647	3	1	0.0027248	42428	Stat92E
GO:0051220	cytoplasmic sequestering of protein	0.405495	-0.902647	3	1	0.0027248	42186	14-3-3epsilon
GO:0006368	transcription elongation from RNA polymerase II promoter	0.405495	-0.902647	3	1	0.0027248	36387	spt4
GO:0007402	ganglion mother cell fate determination	0.405495	-0.902647	3	1	0.0027248	41363	pros
GO:0097341	zymogen inhibition	0.405495	-0.902647	3	1	0.0027248	39753	Diap1
GO:0045039	protein insertion into mitochondrial inner membrane	0.405495	-0.902647	3	1	0.0027248	4379884	CG34132
GO:0061608	nuclear import signal receptor activity	0.405495	-0.902647	3	1	0.0027248	40581	Karybeta3
GO:0071688	striated muscle myosin thick filament assembly	0.405495	-0.902647	3	1	0.0027248	43814	bt
GO:0031113	regulation of microtubule polymerization	0.405495	-0.902647	3	1	0.0027248	41392	Jupiter
GO:0045450	bicoid mRNA localization	0.405495	-0.902647	3	1	0.0027248	42743	cnc
GO:1903053	regulation of extracellular matrix organization	0.405495	-0.902647	3	1	0.0027248	33025	Rab10
GO:0010565	regulation of cellular ketone metabolic process	0.405495	-0.902647	3	1	0.0027248	40155	SREBP
GO:0030240	skeletal muscle thin filament assembly	0.405495	-0.902647	3	1	0.0027248	32314	up
GO:0042994	cytoplasmic sequestering of transcription factor	0.405495	-0.902647	3	1	0.0027248	42186	14-3-3epsilon
GO:0007021	tubulin complex assembly	0.405495	-0.902647	3	1	0.0027248	35532	Tbce
GO:0001519	peptide amidation	0.405495	-0.902647	3	1	0.0027248	37823	Phm
GO:0006984	ER-nucleus signaling pathway	0.405495	-0.902647	3	1	0.0027248	40155	SREBP
GO:0051693	actin filament capping	0.405495	-0.902647	3	1	0.0027248	37387	cpa
GO:0071222	cellular response to lipopolysaccharide	0.405495	-0.902647	3	1	0.0027248	42428	Stat92E
GO:0051881	regulation of mitochondrial membrane potential	0.405495	-0.902647	3	1	0.0027248	36583	Hsc70-5
GO:0006084	acetyl-CoA metabolic process	0.405495	-0.902647	3	1	0.0027248	43562	CG7920
GO:0048082	regulation of adult chitin-containing cuticle pigmentation	0.405495	-0.902647	3	1	0.0027248	38746	ple
GO:0090559	regulation of membrane permeability	0.405495	-0.902647	3	1	0.0027248	41450	Tango9
GO:0001678	cellular glucose homeostasis	0.405495	-0.902647	3	1	0.0027248	39150	Ilp2
GO:0071689	muscle thin filament assembly	0.405495	-0.902647	3	1	0.0027248	43814	bt
GO:0045921	positive regulation of exocytosis	0.405495	-0.902647	3	1	0.0027248	35051	BicD
GO:0043094	cellular metabolic compound salvage	0.405495	-0.902647	3	1	0.0027248	326189	Adi1
GO:0036090	cleavage furrow ingression	0.405495	-0.902647	3	1	0.0027248	40506	Arf79F
GO:0090382	phagosome maturation	0.405495	-0.902647	3	1	0.0027248	33219	crq
GO:0046956	positive phototaxis	0.405495	-0.902647	3	1	0.0027248	32083	dlg1
GO:0006730	one-carbon metabolic process	0.405495	-0.902647	3	1	0.0027248	39390	CAH2
GO:0090062	regulation of trehalose metabolic process	0.405495	-0.902647	3	1	0.0027248	40248	Ide
GO:0046037	GMP metabolic process	0.405495	-0.902647	3	1	0.0027248	32083	dlg1
GO:0044786	cell cycle DNA replication	0.405495	-0.902647	3	1	0.0027248	42550	E2f1
GO:0070509	calcium ion import	0.405495	-0.902647	3	1	0.0027248	34950	Ca-alpha1D
GO:0042542	response to hydrogen peroxide	0.405495	-0.902647	3	1	0.0027248	38746	ple
GO:0045677	negative regulation of R7 cell differentiation	0.405495	-0.902647	3	1	0.0027248	43481	alph
GO:0010738	regulation of protein kinase A signaling	0.405495	-0.902647	3	1	0.0027248	31459	spoon
GO:0007432	salivary gland boundary specification	0.405495	-0.902647	3	1	0.0027248	32400	NetB
GO:0061864	basement membrane constituent secretion	0.405495	-0.902647	3	1	0.0027248	33025	Rab10
GO:0009225	nucleotide-sugar metabolic process	0.405495	-0.902647	3	1	0.0027248	3354921	Gfat1
GO:0044183	protein folding chaperone	0.405495	-0.902647	3	1	0.0027248	36583	Hsc70-5
GO:0045799	positive regulation of chromatin assembly or disassembly	0.405495	-0.902647	3	1	0.0027248	42428	Stat92E
GO:0007593	chitin-based cuticle sclerotization	0.405495	-0.902647	3	1	0.0027248	38746	ple
GO:0042810	pheromone metabolic process	0.405495	-0.902647	3	1	0.0027248	39392	Est-6
GO:0001523	retinoid metabolic process	0.405495	-0.902647	3	1	0.0027248	39812	Pdh
GO:0045116	protein neddylation	0.405495	-0.902647	3	1	0.0027248	39753	Diap1
GO:0051180	vitamin transport	0.405495	-0.902647	3	1	0.0027248	31380	CG3556
GO:0006546	glycine catabolic process	0.405495	-0.902647	3	1	0.0027248	39988	CG7430
GO:0097120	receptor localization to synapse	0.405495	-0.902647	3	1	0.0027248	32083	dlg1
GO:0016126	sterol biosynthetic process	0.405495	-0.902647	3	1	0.0027248	31581	Marf
GO:0045501	regulation of sevenless signaling pathway	0.405495	-0.902647	3	1	0.0027248	43481	alph
GO:0002230	positive regulation of defense response to virus by host	0.405495	-0.902647	3	1	0.0027248	42428	Stat92E
GO:0050691	regulation of defense response to virus by host	0.405495	-0.902647	3	1	0.0027248	42428	Stat92E
GO:0097320	plasma membrane tubulation	0.405495	-0.902647	3	1	0.0027248	38534	Cip4
GO:0070278	extracellular matrix constituent secretion	0.405495	-0.902647	3	1	0.0027248	33025	Rab10
GO:0030104	water homeostasis	0.405495	-0.902647	3	1	0.0027248	41428	ClC-a
GO:0032922	circadian regulation of gene expression	0.405495	-0.902647	3	1	0.0027248	42305	cry
GO:0006044	N-acetylglucosamine metabolic process	0.405495	-0.902647	3	1	0.0027248	33914	CG31637
GO:1902653	secondary alcohol biosynthetic process	0.405495	-0.902647	3	1	0.0027248	31581	Marf
GO:0030834	regulation of actin filament depolymerization	0.405495	-0.902647	3	1	0.0027248	37387	cpa
GO:0031445	regulation of heterochromatin assembly	0.405495	-0.902647	3	1	0.0027248	42428	Stat92E
GO:0043433	negative regulation of DNA-binding transcription factor activity	0.405495	-0.902647	3	1	0.0027248	42186	14-3-3epsilon
GO:2000117	negative regulation of cysteine-type endopeptidase activity	0.405495	-0.902647	3	1	0.0027248	39753	Diap1
GO:0010171	body morphogenesis	0.405495	-0.902647	3	1	0.0027248	40517	alpha-Cat
GO:0000413	protein peptidyl-prolyl isomerization	0.405495	-0.902647	3	1	0.0027248	33271	ninaA
GO:0097340	inhibition of cysteine-type endopeptidase activity	0.405495	-0.902647	3	1	0.0027248	39753	Diap1
GO:0006220	pyrimidine nucleotide metabolic process	0.405495	-0.902647	3	1	0.0027248	43739	awd
GO:0071216	cellular response to biotic stimulus	0.405495	-0.902647	3	1	0.0027248	42428	Stat92E
GO:0007301	female germline ring canal formation	0.405495	-0.902647	3	1	0.0027248	44289	flw
GO:0090141	positive regulation of mitochondrial fission	0.405495	-0.902647	3	1	0.0027248	31607	Pink1
GO:0046040	IMP metabolic process	0.405495	-0.902647	3	1	0.0027248	42973	CG11089
GO:0048087	positive regulation of developmental pigmentation	0.405495	-0.902647	3	1	0.0027248	31607	Pink1
GO:0030835	negative regulation of actin filament depolymerization	0.405495	-0.902647	3	1	0.0027248	37387	cpa
GO:1902914	regulation of protein polyubiquitination	0.405495	-0.902647	3	1	0.0027248	41181	hyd
GO:0046902	regulation of mitochondrial membrane permeability	0.405495	-0.902647	3	1	0.0027248	41450	Tango9
GO:0007064	mitotic sister chromatid cohesion	0.405495	-0.902647	3	1	0.0027248	44724	san
GO:0046847	filopodium assembly	0.405495	-0.902647	3	1	0.0027248	31717	sn
GO:0016925	protein sumoylation	0.405495	-0.902647	3	1	0.0027248	33981	smt3
GO:0006544	glycine metabolic process	0.405495	-0.902647	3	1	0.0027248	39988	CG7430
GO:0008205	ecdysone metabolic process	0.405495	-0.902647	3	1	0.0027248	31581	Marf
GO:0097327	response to antineoplastic agent	0.405495	-0.902647	3	1	0.0027248	40627	rtp
GO:0098732	macromolecule deacylation	0.405495	-0.902647	3	1	0.0027248	59176	CG18815
GO:0052128	positive energy taxis	0.405495	-0.902647	3	1	0.0027248	32083	dlg1
GO:2000035	regulation of stem cell division	0.405495	-0.902647	3	1	0.0027248	33343	chinmo
GO:0042811	pheromone biosynthetic process	0.405495	-0.902647	3	1	0.0027248	39392	Est-6
GO:1905477	positive regulation of protein localization to membrane	0.405495	-0.902647	3	1	0.0027248	33981	smt3
GO:0006766	vitamin metabolic process	0.405495	-0.902647	3	1	0.0027248	31857	CG12118
GO:0009083	branched-chain amino acid catabolic process	0.405495	-0.902647	3	1	0.0027248	3355069	CG17691
GO:0048524	positive regulation of viral process	0.405495	-0.902647	3	1	0.0027248	36040	TER94
GO:1903902	positive regulation of viral life cycle	0.405495	-0.902647	3	1	0.0027248	36040	TER94
GO:0051204	protein insertion into mitochondrial membrane	0.405495	-0.902647	3	1	0.0027248	4379884	CG34132
GO:0060269	centripetally migrating follicle cell migration	0.405495	-0.902647	3	1	0.0027248	31459	spoon
GO:2000377	regulation of reactive oxygen species metabolic process	0.405495	-0.902647	3	1	0.0027248	117332	Rheb
GO:0071479	cellular response to ionizing radiation	0.405495	-0.902647	3	1	0.0027248	42428	Stat92E
GO:0042023	DNA endoreduplication	0.405495	-0.902647	3	1	0.0027248	42550	E2f1
GO:0017062	respiratory chain complex III assembly	0.405495	-0.902647	3	1	0.0027248	32586	UQCR-14
GO:0060250	germ-line stem-cell niche homeostasis	0.405495	-0.902647	3	1	0.0027248	39150	Ilp2
GO:0001775	cell activation	0.405495	-0.902647	3	1	0.0027248	33219	crq
GO:0046337	phosphatidylethanolamine metabolic process	0.405495	-0.902647	3	1	0.0027248	35417	CG2201
GO:0007386	compartment pattern specification	0.405495	-0.902647	3	1	0.0027248	44540	ct
GO:0031398	positive regulation of protein ubiquitination	0.405495	-0.902647	3	1	0.0027248	39753	Diap1
GO:0071219	cellular response to molecule of bacterial origin	0.405495	-0.902647	3	1	0.0027248	42428	Stat92E
GO:0097193	intrinsic apoptotic signaling pathway	0.405495	-0.902647	3	1	0.0027248	33271	ninaA
GO:0003755	peptidyl-prolyl cis-trans isomerase activity	0.405495	-0.902647	3	1	0.0027248	33271	ninaA
GO:0008333	endosome to lysosome transport	0.405495	-0.902647	3	1	0.0027248	36015	Vamp7
GO:0046351	disaccharide biosynthetic process	0.405495	-0.902647	3	1	0.0027248	35265	fbp
GO:0006570	tyrosine metabolic process	0.405495	-0.902647	3	1	0.0027248	38746	ple
GO:0031204	posttranslational protein targeting to membrane, translocation	0.405495	-0.902647	3	1	0.0027248	38819	Sec63
GO:0034551	mitochondrial respiratory chain complex III assembly	0.405495	-0.902647	3	1	0.0027248	32586	UQCR-14
GO:0007311	maternal specification of dorsal/ventral axis, oocyte, germ-line encoded	0.405495	-0.902647	3	1	0.0027248	36046	sel
GO:0070059	intrinsic apoptotic signaling pathway in response to endoplasmic reticulum stress	0.405495	-0.902647	3	1	0.0027248	33271	ninaA
GO:1901070	guanosine-containing compound biosynthetic process	0.405495	-0.902647	3	1	0.0027248	43739	awd
GO:1901216	positive regulation of neuron death	0.405495	-0.902647	3	1	0.0027248	36040	TER94
GO:0065001	specification of axis polarity	0.405495	-0.902647	3	1	0.0027248	36046	sel
GO:0031179	peptide modification	0.405495	-0.902647	3	1	0.0027248	37823	Phm
GO:0061963	regulation of entry into reproductive diapause	0.405495	-0.902647	3	1	0.0027248	39150	Ilp2
GO:0006354	DNA-templated transcription, elongation	0.405495	-0.902647	3	1	0.0027248	36387	spt4
GO:0009068	aspartate family amino acid catabolic process	0.405495	-0.902647	3	1	0.0027248	36040	TER94
GO:0045199	maintenance of epithelial cell apical/basal polarity	0.405495	-0.902647	3	1	0.0027248	43003	veli
GO:0050879	multicellular organismal movement	0.405495	-0.902647	3	1	0.0027248	32314	up
GO:0045819	positive regulation of glycogen catabolic process	0.405495	-0.902647	3	1	0.0027248	39454	Atg1
GO:0035626	juvenile hormone mediated signaling pathway	0.405495	-0.902647	3	1	0.0027248	38490	Chd64
GO:0031116	positive regulation of microtubule polymerization	0.405495	-0.902647	3	1	0.0027248	41392	Jupiter
GO:0051123	RNA polymerase II preinitiation complex assembly	0.405495	-0.902647	3	1	0.0027248	42822	TfIIA-S
GO:0050881	musculoskeletal movement	0.405495	-0.902647	3	1	0.0027248	32314	up
GO:0007160	cell-matrix adhesion	0.405495	-0.902647	3	1	0.0027248	35215	Pax
GO:0007023	post-chaperonin tubulin folding pathway	0.405495	-0.902647	3	1	0.0027248	35532	Tbce
GO:0006221	pyrimidine nucleotide biosynthetic process	0.405495	-0.902647	3	1	0.0027248	43739	awd
GO:0051640	organelle localization	0.414671	-0.880271	75	13	0.0354223	3.16073e+65	Pink1,dlg1,Rab10,BicD,clu,Syx1A,Bsg,Syngr,tacc,Marf,flw,ctp,cnc
GO:0031667	response to nutrient levels	0.419397	-0.868936	63	11	0.0299728	3.94544e+57	Atg1,Bruce,Atg12,CG17691,Rheb,Ilp2,Ih,GLaz,SLC5A11,Ilp6,Ide
GO:0009991	response to extracellular stimulus	0.419397	-0.868936	63	11	0.0299728	3.93833e+57	Atg12,CG17691,Bruce,Atg1,Ide,Ih,SLC5A11,GLaz,Ilp2,Rheb,Ilp6
GO:0009953	dorsal/ventral pattern formation	0.424241	-0.857453	51	9	0.0245232	4.21864e+44	14-3-3epsilon,cnc,gammaSnap1,sel,csw,spoon,CG1943,flw,BicD
GO:0030111	regulation of Wnt signaling pathway	0.429087	-0.846097	39	7	0.0190736	4.42054e+34	spen,flw,Dyrk2,Diap1,TER94,Pp1alpha-96A,hyd
GO:0006520	cellular amino acid metabolic process	0.429087	-0.846097	39	7	0.0190736	3.67823e+37	Got1,Adi1,ple,CG1461,TER94,CG17691,CG7430
GO:0007304	chorion-containing eggshell formation	0.431405	-0.840708	33	6	0.0163488	3.39813e+29	smt3,spoon,Pax,E2f1,Rac2,gus
GO:0007619	courtship behavior	0.431405	-0.840708	33	6	0.0163488	3.93923e+29	Est-6,eag,pros,dlg1,tko,ple
GO:0008285	negative regulation of cell population proliferation	0.431405	-0.840708	33	6	0.0163488	3.25864e+29	UQCR-14,CG5214,CG7834,COX5A,Csk,pros
GO:0031396	regulation of protein ubiquitination	0.431918	-0.83952	9	2	0.00544959	3975341181	Diap1,hyd
GO:0018394	peptidyl-lysine acetylation	0.431918	-0.83952	9	2	0.00544959	4472432318	san,tth
GO:1904799	regulation of neuron remodeling	0.431918	-0.83952	9	2	0.00544959	4050631405	Arf79F,ctp
GO:0045467	R7 cell development	0.431918	-0.83952	9	2	0.00544959	4601540464	tutl,Ten-m
GO:0018393	internal peptidyl-lysine acetylation	0.431918	-0.83952	9	2	0.00544959	4472432318	san,tth
GO:0006911	phagocytosis, engulfment	0.431918	-0.83952	9	2	0.00544959	3321945278	crq,csw
GO:1904263	positive regulation of TORC1 signaling	0.431918	-0.83952	9	2	0.00544959	11733242550	Rheb,E2f1
GO:0045571	negative regulation of imaginal disc growth	0.431918	-0.83952	9	2	0.00544959	4139832083	Csk,dlg1
GO:0014041	regulation of neuron maturation	0.431918	-0.83952	9	2	0.00544959	3140540506	ctp,Arf79F
GO:0042659	regulation of cell fate specification	0.431918	-0.83952	9	2	0.00544959	3884641363	lqf,pros
GO:0036335	intestinal stem cell homeostasis	0.431918	-0.83952	9	2	0.00544959	3841342743	PHGPx,cnc
GO:0007392	initiation of dorsal closure	0.431918	-0.83952	9	2	0.00544959	4111838831	FER,Rac2
GO:0044247	cellular polysaccharide catabolic process	0.431918	-0.83952	9	2	0.00544959	3938339454	Atg12,Atg1
GO:0099174	regulation of presynapse organization	0.431918	-0.83952	9	2	0.00544959	4046439454	Ten-m,Atg1
GO:0098661	inorganic anion transmembrane transport	0.431918	-0.83952	9	2	0.00544959	4142836381	ClC-a,ClC-b
GO:0048872	homeostasis of number of cells	0.431918	-0.83952	9	2	0.00544959	4274338413	cnc,PHGPx
GO:0009161	ribonucleoside monophosphate metabolic process	0.431918	-0.83952	9	2	0.00544959	3208342973	dlg1,CG11089
GO:0007173	epidermal growth factor receptor signaling pathway	0.431918	-0.83952	9	2	0.00544959	4420545278	spen,csw
GO:0010669	epithelial structure maintenance	0.431918	-0.83952	9	2	0.00544959	4139839454	Csk,Atg1
GO:0032007	negative regulation of TOR signaling	0.431918	-0.83952	9	2	0.00544959	39454117332	Atg1,Rheb
GO:0031345	negative regulation of cell projection organization	0.431918	-0.83952	9	2	0.00544959	3738741363	cpa,pros
GO:0000028	ribosomal small subunit assembly	0.431918	-0.83952	9	2	0.00544959	3441236851	mRpS7,RpS15
GO:0071456	cellular response to hypoxia	0.431918	-0.83952	9	2	0.00544959	4497844936	Tom40,Eip93F
GO:0016573	histone acetylation	0.431918	-0.83952	9	2	0.00544959	4472432318	san,tth
GO:0000272	polysaccharide catabolic process	0.431918	-0.83952	9	2	0.00544959	3945439383	Atg1,Atg12
GO:0006475	internal protein amino acid acetylation	0.431918	-0.83952	9	2	0.00544959	4472432318	san,tth
GO:0007016	cytoskeletal anchoring at plasma membrane	0.431918	-0.83952	9	2	0.00544959	4051735215	alpha-Cat,Pax
GO:0006473	protein acetylation	0.431918	-0.83952	9	2	0.00544959	3231844724	tth,san
GO:0014066	regulation of phosphatidylinositol 3-kinase signaling	0.431918	-0.83952	9	2	0.00544959	4024839454	Ide,Atg1
GO:0003014	renal system process	0.431918	-0.83952	9	2	0.00544959	3468641428	MRP,ClC-a
GO:0009123	nucleoside monophosphate metabolic process	0.431918	-0.83952	9	2	0.00544959	4297332083	CG11089,dlg1
GO:0043647	inositol phosphate metabolic process	0.431918	-0.83952	9	2	0.00544959	4170133137	Ipp,l(1)G0196
GO:0051170	import into nucleus	0.431918	-0.83952	9	2	0.00544959	4058133343	Karybeta3,chinmo
GO:0034331	cell junction maintenance	0.431918	-0.83952	9	2	0.00544959	3883141398	Rac2,Csk
GO:0038127	ERBB signaling pathway	0.431918	-0.83952	9	2	0.00544959	4527844205	csw,spen
GO:0046843	dorsal appendage formation	0.433507	-0.835846	27	5	0.013624	3.14593e+24	spoon,smt3,Rac2,gus,Pax
GO:1902850	microtubule cytoskeleton organization involved in mitosis	0.43511	-0.832157	21	4	0.0108992	3.39813e+19	smt3,dlg1,tacc,ctp
GO:0001894	tissue homeostasis	0.43511	-0.832157	21	4	0.0108992	3.50784e+19	Arr1,Atg1,Csk,Arr2
GO:0007631	feeding behavior	0.435463	-0.831346	15	3	0.00817439	341173915038831	SLC5A11,Ilp2,Rac2
GO:1902875	regulation of embryonic pattern specification	0.435463	-0.831346	15	3	0.00817439	428544274336040	Syx1A,cnc,TER94
GO:0042737	drug catabolic process	0.435463	-0.831346	15	3	0.00817439	349793998842109	Idgf2,CG7430,Prx3
GO:0045197	establishment or maintenance of epithelial cell apical/basal polarity	0.435463	-0.831346	15	3	0.00817439	413984300332083	Csk,veli,dlg1
GO:0110116	regulation of compound eye photoreceptor cell differentiation	0.435463	-0.831346	15	3	0.00817439	452784348141363	csw,alph,pros
GO:0008654	phospholipid biosynthetic process	0.435463	-0.831346	15	3	0.00817439	433503541732909	mino,CG2201,CG7990
GO:1901214	regulation of neuron death	0.435463	-0.831346	15	3	0.00817439	3.60403e+16	TER94,Pink1,futsch
GO:0044283	small molecule biosynthetic process	0.438041	-0.825444	70	12	0.0326975	3.35323e+60	Hydr2,Pgk,CG3961,Adi1,awd,Got1,Marf,l(1)G0196,SREBP,fbp,Tpi,Npc1a
GO:0071495	cellular response to endogenous stimulus	0.444926	-0.809848	58	10	0.027248	3.35324e+50	Hydr2,Chd64,csw,smt3,Nurf-38,Ilp6,PyK,Ilp2,Rheb,Rab10
GO:0043902	positive regulation of multi-organism process	0.44867	-0.801468	52	9	0.0245232	4.25504e+44	E2f1,Pli,Listericin,Ide,Diap1,Pp1alpha-96A,Atg1,TER94,smt3
GO:0072657	protein localization to membrane	0.456986	-0.783102	40	7	0.0190736	3.18841e+37	Bsg,veli,Sec63,CG34132,Rab10,dlg1,Arf79F
GO:0048512	circadian behavior	0.456986	-0.783102	40	7	0.0190736	4.70653e+34	qsm,dlg1,Pka-R2,cry,Ih,Ilp2,cu
GO:0008340	determination of adult lifespan	0.459026	-0.778649	71	12	0.0326975	4.35824e+59	Tpi,Ide,Ih,GLaz,Ilp2,alpha-Man-Ia,alph,Prx3,Indy,cnc,sun,14-3-3epsilon
GO:0001505	regulation of neurotransmitter levels	0.459026	-0.778649	71	12	0.0326975	3.88464e+59	lqf,CG7430,gammaSnap1,t,Arf79F,Csp,veli,Syngr,Syx1A,Ih,BicD,Scamp
GO:0030703	eggshell formation	0.461706	-0.772828	34	6	0.0163488	3.39813e+29	smt3,spoon,E2f1,Rac2,gus,Pax
GO:0034976	response to endoplasmic reticulum stress	0.461706	-0.772828	34	6	0.0163488	4.07913e+29	godzilla,ninaA,Marf,PHGPx,cnc,CG11842
GO:0033044	regulation of chromosome organization	0.466959	-0.761513	28	5	0.013624	3.23534e+24	mamo,CG8036,hyd,jim,Stat92E
GO:0016491	oxidoreductase activity	0.472958	-0.748749	22	4	0.0108992	3.24194e+22	CG9512,Adh,CG6084,Adi1
GO:0018209	peptidyl-serine modification	0.472958	-0.748749	22	4	0.0108992	3.48314e+19	Dyrk2,awd,inaC,Pkc53E
GO:0045807	positive regulation of endocytosis	0.472958	-0.748749	22	4	0.0108992	4.83114e+19	Pkc53E,BicD,Arf79F,inaC
GO:0045466	R7 cell differentiation	0.472958	-0.748749	22	4	0.0108992	4.13634e+19	pros,Ten-m,csw,tutl
GO:0018105	peptidyl-serine phosphorylation	0.472958	-0.748749	22	4	0.0108992	4.83113e+19	Pkc53E,Dyrk2,awd,inaC
GO:2000243	positive regulation of reproductive process	0.472958	-0.748749	22	4	0.0108992	3.97533e+20	Diap1,Adi1,E2f1,Atg1
GO:0001228	DNA-binding transcription activator activity, RNA polymerase II-specific	0.472958	-0.748749	22	4	0.0108992	4.25504e+19	E2f1,SREBP,Stat92E,Pdp1
GO:0033365	protein localization to organelle	0.478459	-0.737184	47	8	0.0217984	3.25163e+41	CG8206,Tim9a,Sec63,Tom40,UQCR-C2,CG34132,Karybeta3,Tom20
GO:0070507	regulation of microtubule cytoskeleton organization	0.480073	-0.733818	16	3	0.00817439	5.74054e+16	futsch,tacc,Jupiter
GO:0017157	regulation of exocytosis	0.480073	-0.733818	16	3	0.00817439	330254285435051	Rab10,Syx1A,BicD
GO:0097164	ammonium ion metabolic process	0.480073	-0.733818	16	3	0.00817439	354173874631863	CG2201,ple,t
GO:1903034	regulation of response to wounding	0.480073	-0.733818	16	3	0.00817439	369053883140459	Cbp53E,Rac2,Csp
GO:1904580	regulation of intracellular mRNA localization	0.480073	-0.733818	16	3	0.00817439	360404285442743	TER94,Syx1A,cnc
GO:0019216	regulation of lipid metabolic process	0.480073	-0.733818	16	3	0.00817439	455883799440155	Pdp1,CG2765,SREBP
GO:0002066	columnar/cuboidal epithelial cell development	0.48032	-0.733303	97	16	0.0435967	3.39814e+79	smt3,Stat92E,me31B,kst,RN-tre,dlg1,Diap1,Cip4,ct,E2f1,spoon,csw,Pax,gus,veli,Rac2
GO:0030707	ovarian follicle cell development	0.48032	-0.733303	97	16	0.0435967	4.24283e+79	Stat92E,me31B,kst,smt3,E2f1,ct,Cip4,Diap1,RN-tre,dlg1,gus,Pax,csw,spoon,Rac2,veli
GO:1901700	response to oxygen-containing compound	0.484468	-0.724705	116	19	0.0517711	4.13594e+97	CG17734,Pka-R2,Sirup,eag,PHGPx,ple,Adh,PyK,Rheb,Ilp2,inaC,wtrw,Stat92E,dlg1,Rab10,Nurf-38,Ilp6,homer,GLaz
GO:0001708	cell fate specification	0.489004	-0.715384	10	2	0.00544959	3208341363	dlg1,pros
GO:0048865	stem cell fate commitment	0.489004	-0.715384	10	2	0.00544959	4136344205	pros,spen
GO:0000045	autophagosome assembly	0.489004	-0.715384	10	2	0.00544959	3945439383	Atg1,Atg12
GO:0031935	regulation of chromatin silencing	0.489004	-0.715384	10	2	0.00544959	4102743924	CG8036,jim
GO:0051098	regulation of binding	0.489004	-0.715384	10	2	0.00544959	3507838993	Arr1,Arr2
GO:0042133	neurotransmitter metabolic process	0.489004	-0.715384	10	2	0.00544959	3186339988	t,CG7430
GO:0043543	protein acylation	0.489004	-0.715384	10	2	0.00544959	4472432318	san,tth
GO:0032008	positive regulation of TOR signaling	0.489004	-0.715384	10	2	0.00544959	42550117332	E2f1,Rheb
GO:0046664	dorsal closure, amnioserosa morphology change	0.489004	-0.715384	10	2	0.00544959	4111840517	FER,alpha-Cat
GO:0016055	Wnt signaling pathway	0.489004	-0.715384	10	2	0.00544959	4428942922	flw,Pp1alpha-96A
GO:0046662	regulation of oviposition	0.489004	-0.715384	10	2	0.00544959	3939240248	Est-6,Ide
GO:0042332	gravitaxis	0.489004	-0.715384	10	2	0.00544959	4230532083	cry,dlg1
GO:0048859	formation of anatomical boundary	0.489004	-0.715384	10	2	0.00544959	4454032400	ct,NetB
GO:0005484	SNAP receptor activity	0.489004	-0.715384	10	2	0.00544959	4285436015	Syx1A,Vamp7
GO:0031644	regulation of nervous system process	0.489004	-0.715384	10	2	0.00544959	3160734364	Pink1,me31B
GO:0043112	receptor metabolic process	0.489004	-0.715384	10	2	0.00544959	3507838993	Arr1,Arr2
GO:0045938	positive regulation of circadian sleep/wake cycle, sleep	0.489004	-0.715384	10	2	0.00544959	3658933944	Ih,homer
GO:0000132	establishment of mitotic spindle orientation	0.489004	-0.715384	10	2	0.00544959	3140532083	ctp,dlg1
GO:0007427	epithelial cell migration, open tracheal system	0.489004	-0.715384	10	2	0.00544959	4373945278	awd,csw
GO:0009629	response to gravity	0.489004	-0.715384	10	2	0.00544959	4230532083	cry,dlg1
GO:0016241	regulation of macroautophagy	0.489004	-0.715384	10	2	0.00544959	11733241260	Rheb,Bruce
GO:0006821	chloride transport	0.489004	-0.715384	10	2	0.00544959	3638141428	ClC-b,ClC-a
GO:0046621	negative regulation of organ growth	0.489004	-0.715384	10	2	0.00544959	3208341398	dlg1,Csk
GO:0022407	regulation of cell-cell adhesion	0.489004	-0.715384	10	2	0.00544959	4046432083	Ten-m,dlg1
GO:1901071	glucosamine-containing compound metabolic process	0.489004	-0.715384	10	2	0.00544959	3391434979	CG31637,Idgf2
GO:0017004	cytochrome complex assembly	0.489004	-0.715384	10	2	0.00544959	3258632989	UQCR-14,COX6B
GO:0031400	negative regulation of protein modification process	0.491588	-0.710113	35	6	0.0163488	4.42894e+29	flw,alph,chinmo,hyd,CG17059,cpa
GO:0006644	phospholipid metabolic process	0.491588	-0.710113	35	6	0.0163488	3.54174e+29	CG2201,mino,CG7990,CG14945,Ipp,rdgB
GO:0008610	lipid biosynthetic process	0.497018	-0.69913	54	9	0.0245232	4.48873e+44	mdy,Marf,CG7990,Hydr2,CG3961,Npc1a,CG2201,mino,SREBP
GO:0002065	columnar/cuboidal epithelial cell differentiation	0.498303	-0.696548	98	16	0.0435967	3.88314e+79	Rac2,veli,spoon,csw,gus,Pax,dlg1,Diap1,Cip4,RN-tre,E2f1,ct,smt3,kst,me31B,Stat92E
GO:0034470	ncRNA processing	0.499787	-0.693573	29	5	0.013624	3.14833e+24	RpL35,CG4364,RpS8,RpL7A,RpL10Ab
GO:0016042	lipid catabolic process	0.499787	-0.693573	29	5	0.013624	3.24264e+24	pdgy,bmm,GLaz,CG17292,Hydr2
GO:0009620	response to fungus	0.499787	-0.693573	29	5	0.013624	4.42053e+24	spen,Tsf1,Phm,CG9372,Drsl5
GO:0007274	neuromuscular synaptic transmission	0.499787	-0.693573	29	5	0.013624	3.24704e+24	Scamp,Syx1A,Pink1,Tbce,Ten-m
GO:0006650	glycerophospholipid metabolic process	0.499787	-0.693573	29	5	0.013624	3.54174e+24	CG2201,Ipp,rdgB,CG7990,CG14945
GO:0002833	positive regulation of response to biotic stimulus	0.499787	-0.693573	29	5	0.013624	3.61834e+24	Listericin,Ide,smt3,Pp1alpha-96A,Pli
GO:0001055	RNA polymerase II activity	0.500193	-0.692762	4	1	0.0027248	40415	Rpb8
GO:0035216	haltere disc development	0.500193	-0.692762	4	1	0.0027248	42854	Syx1A
GO:0006121	mitochondrial electron transport, succinate to ubiquinone	0.500193	-0.692762	4	1	0.0027248	35590	SdhB
GO:0033617	mitochondrial respiratory chain complex IV assembly	0.500193	-0.692762	4	1	0.0027248	32989	COX6B
GO:0045913	positive regulation of carbohydrate metabolic process	0.500193	-0.692762	4	1	0.0027248	39454	Atg1
GO:0060004	reflex	0.500193	-0.692762	4	1	0.0027248	36589	Ih
GO:1903322	positive regulation of protein modification by small protein conjugation or removal	0.500193	-0.692762	4	1	0.0027248	39753	Diap1
GO:0048036	central complex development	0.500193	-0.692762	4	1	0.0027248	38059	Ptpmeg
GO:0030336	negative regulation of cell migration	0.500193	-0.692762	4	1	0.0027248	38059	Ptpmeg
GO:0009071	serine family amino acid catabolic process	0.500193	-0.692762	4	1	0.0027248	39988	CG7430
GO:0030032	lamellipodium assembly	0.500193	-0.692762	4	1	0.0027248	38831	Rac2
GO:0007026	negative regulation of microtubule depolymerization	0.500193	-0.692762	4	1	0.0027248	40589	tacc
GO:0007482	haltere development	0.500193	-0.692762	4	1	0.0027248	42854	Syx1A
GO:0006620	posttranslational protein targeting to endoplasmic reticulum membrane	0.500193	-0.692762	4	1	0.0027248	38819	Sec63
GO:0042743	hydrogen peroxide metabolic process	0.500193	-0.692762	4	1	0.0027248	42109	Prx3
GO:0035076	ecdysone receptor-mediated signaling pathway	0.500193	-0.692762	4	1	0.0027248	37922	Nurf-38
GO:1903146	regulation of autophagy of mitochondrion	0.500193	-0.692762	4	1	0.0027248	40155	SREBP
GO:0010884	positive regulation of lipid storage	0.500193	-0.692762	4	1	0.0027248	39611	bmm
GO:0048846	axon extension involved in axon guidance	0.500193	-0.692762	4	1	0.0027248	38059	Ptpmeg
GO:0071545	inositol phosphate catabolic process	0.500193	-0.692762	4	1	0.0027248	41701	Ipp
GO:0051125	regulation of actin nucleation	0.500193	-0.692762	4	1	0.0027248	38534	Cip4
GO:0043001	Golgi to plasma membrane protein transport	0.500193	-0.692762	4	1	0.0027248	40506	Arf79F
GO:1900180	regulation of protein localization to nucleus	0.500193	-0.692762	4	1	0.0027248	41363	pros
GO:1903900	regulation of viral life cycle	0.500193	-0.692762	4	1	0.0027248	36040	TER94
GO:1902410	mitotic cytokinetic process	0.500193	-0.692762	4	1	0.0027248	40506	Arf79F
GO:0007634	optokinetic behavior	0.500193	-0.692762	4	1	0.0027248	36589	Ih
GO:0046008	regulation of female receptivity, post-mating	0.500193	-0.692762	4	1	0.0027248	39392	Est-6
GO:0061058	regulation of peptidoglycan recognition protein signaling pathway	0.500193	-0.692762	4	1	0.0027248	36183	Listericin
GO:1901072	glucosamine-containing compound catabolic process	0.500193	-0.692762	4	1	0.0027248	34979	Idgf2
GO:0031112	positive regulation of microtubule polymerization or depolymerization	0.500193	-0.692762	4	1	0.0027248	41392	Jupiter
GO:0046855	inositol phosphate dephosphorylation	0.500193	-0.692762	4	1	0.0027248	41701	Ipp
GO:0033014	tetrapyrrole biosynthetic process	0.500193	-0.692762	4	1	0.0027248	46140	l(3)02640
GO:0000096	sulfur amino acid metabolic process	0.500193	-0.692762	4	1	0.0027248	326189	Adi1
GO:0060571	morphogenesis of an epithelial fold	0.500193	-0.692762	4	1	0.0027248	44540	ct
GO:1900425	negative regulation of defense response to bacterium	0.500193	-0.692762	4	1	0.0027248	42821	Pli
GO:0070875	positive regulation of glycogen metabolic process	0.500193	-0.692762	4	1	0.0027248	39454	Atg1
GO:0071632	optomotor response	0.500193	-0.692762	4	1	0.0027248	36589	Ih
GO:0019896	axonal transport of mitochondrion	0.500193	-0.692762	4	1	0.0027248	31581	Marf
GO:1903318	negative regulation of protein maturation	0.500193	-0.692762	4	1	0.0027248	39753	Diap1
GO:0097254	renal tubular secretion	0.500193	-0.692762	4	1	0.0027248	34686	MRP
GO:0009081	branched-chain amino acid metabolic process	0.500193	-0.692762	4	1	0.0027248	3355069	CG17691
GO:0050792	regulation of viral process	0.500193	-0.692762	4	1	0.0027248	36040	TER94
GO:0010771	negative regulation of cell morphogenesis involved in differentiation	0.500193	-0.692762	4	1	0.0027248	41363	pros
GO:1902284	neuron projection extension involved in neuron projection guidance	0.500193	-0.692762	4	1	0.0027248	38059	Ptpmeg
GO:0032958	inositol phosphate biosynthetic process	0.500193	-0.692762	4	1	0.0027248	33137	l(1)G0196
GO:0001054	RNA polymerase I activity	0.500193	-0.692762	4	1	0.0027248	40415	Rpb8
GO:0035186	syncytial blastoderm mitotic cell cycle	0.500193	-0.692762	4	1	0.0027248	33981	smt3
GO:0030518	intracellular steroid hormone receptor signaling pathway	0.500193	-0.692762	4	1	0.0027248	37922	Nurf-38
GO:0051271	negative regulation of cellular component movement	0.500193	-0.692762	4	1	0.0027248	38059	Ptpmeg
GO:0022410	circadian sleep/wake cycle process	0.500193	-0.692762	4	1	0.0027248	36589	Ih
GO:0045324	late endosome to vacuole transport	0.500193	-0.692762	4	1	0.0027248	38529	CG15012
GO:2001234	negative regulation of apoptotic signaling pathway	0.500193	-0.692762	4	1	0.0027248	41450	Tango9
GO:0050802	circadian sleep/wake cycle, sleep	0.500193	-0.692762	4	1	0.0027248	36589	Ih
GO:0048499	synaptic vesicle membrane organization	0.500193	-0.692762	4	1	0.0027248	40464	Ten-m
GO:0001056	RNA polymerase III activity	0.500193	-0.692762	4	1	0.0027248	40415	Rpb8
GO:0021675	nerve development	0.500193	-0.692762	4	1	0.0027248	41363	pros
GO:0018208	peptidyl-proline modification	0.500193	-0.692762	4	1	0.0027248	33271	ninaA
GO:0006406	mRNA export from nucleus	0.500193	-0.692762	4	1	0.0027248	3354919	Dbp80
GO:0022409	positive regulation of cell-cell adhesion	0.500193	-0.692762	4	1	0.0027248	40464	Ten-m
GO:0006537	glutamate biosynthetic process	0.500193	-0.692762	4	1	0.0027248	36782	Got1
GO:0032200	telomere organization	0.500193	-0.692762	4	1	0.0027248	37798	Nap1
GO:0007539	primary sex determination, soma	0.500193	-0.692762	4	1	0.0027248	31442	snf
GO:0007637	proboscis extension reflex	0.500193	-0.692762	4	1	0.0027248	36589	Ih
GO:0016251	RNA polymerase II general transcription initiation factor activity	0.500193	-0.692762	4	1	0.0027248	42822	TfIIA-S
GO:0051643	endoplasmic reticulum localization	0.500193	-0.692762	4	1	0.0027248	318841	Bsg
GO:0009312	oligosaccharide biosynthetic process	0.500193	-0.692762	4	1	0.0027248	35265	fbp
GO:0009309	amine biosynthetic process	0.500193	-0.692762	4	1	0.0027248	31863	t
GO:0006509	membrane protein ectodomain proteolysis	0.500193	-0.692762	4	1	0.0027248	43501	Kul
GO:0031589	cell-substrate adhesion	0.500193	-0.692762	4	1	0.0027248	35215	Pax
GO:2000765	regulation of cytoplasmic translation	0.500193	-0.692762	4	1	0.0027248	34364	me31B
GO:0006783	heme biosynthetic process	0.500193	-0.692762	4	1	0.0027248	46140	l(3)02640
GO:0018198	peptidyl-cysteine modification	0.500193	-0.692762	4	1	0.0027248	46140	l(3)02640
GO:0000266	mitochondrial fission	0.500193	-0.692762	4	1	0.0027248	31607	Pink1
GO:0019856	pyrimidine nucleobase biosynthetic process	0.500193	-0.692762	4	1	0.0027248	39396	Adk1
GO:0019320	hexose catabolic process	0.500193	-0.692762	4	1	0.0027248	33935	Galt
GO:0035168	larval lymph gland hemocyte differentiation	0.500193	-0.692762	4	1	0.0027248	42428	Stat92E
GO:0010907	positive regulation of glucose metabolic process	0.500193	-0.692762	4	1	0.0027248	39454	Atg1
GO:0001672	regulation of chromatin assembly or disassembly	0.500193	-0.692762	4	1	0.0027248	42428	Stat92E
GO:0097581	lamellipodium organization	0.500193	-0.692762	4	1	0.0027248	38831	Rac2
GO:0006207	'de novo' pyrimidine nucleobase biosynthetic process	0.500193	-0.692762	4	1	0.0027248	39396	Adk1
GO:0005991	trehalose metabolic process	0.500193	-0.692762	4	1	0.0027248	45368	Treh
GO:2000274	regulation of epithelial cell migration, open tracheal system	0.500193	-0.692762	4	1	0.0027248	38746	ple
GO:0046058	cAMP metabolic process	0.500193	-0.692762	4	1	0.0027248	35107	Pde11
GO:0046365	monosaccharide catabolic process	0.500193	-0.692762	4	1	0.0027248	33935	Galt
GO:1901475	pyruvate transmembrane transport	0.500193	-0.692762	4	1	0.0027248	40049	Indy
GO:0031111	negative regulation of microtubule polymerization or depolymerization	0.500193	-0.692762	4	1	0.0027248	40589	tacc
GO:0006848	pyruvate transport	0.500193	-0.692762	4	1	0.0027248	40049	Indy
GO:0000723	telomere maintenance	0.500193	-0.692762	4	1	0.0027248	37798	Nap1
GO:0006032	chitin catabolic process	0.500193	-0.692762	4	1	0.0027248	34979	Idgf2
GO:0042387	plasmatocyte differentiation	0.500193	-0.692762	4	1	0.0027248	42428	Stat92E
GO:0034453	microtubule anchoring	0.500193	-0.692762	4	1	0.0027248	31405	ctp
GO:0048138	germ-line cyst encapsulation	0.500193	-0.692762	4	1	0.0027248	38534	Cip4
GO:2000146	negative regulation of cell motility	0.500193	-0.692762	4	1	0.0027248	38059	Ptpmeg
GO:0006117	acetaldehyde metabolic process	0.500193	-0.692762	4	1	0.0027248	3771877	Adh
GO:0071427	mRNA-containing ribonucleoprotein complex export from nucleus	0.500193	-0.692762	4	1	0.0027248	3354919	Dbp80
GO:0016209	antioxidant activity	0.500193	-0.692762	4	1	0.0027248	42109	Prx3
GO:0017001	antibiotic catabolic process	0.500193	-0.692762	4	1	0.0027248	42109	Prx3
GO:0007620	copulation	0.500193	-0.692762	4	1	0.0027248	39392	Est-6
GO:1903706	regulation of hemopoiesis	0.500193	-0.692762	4	1	0.0027248	40506	Arf79F
GO:2000574	regulation of microtubule motor activity	0.500193	-0.692762	4	1	0.0027248	31405	ctp
GO:0042776	mitochondrial ATP synthesis coupled proton transport	0.500193	-0.692762	4	1	0.0027248	43829	ATPsynbeta
GO:0046838	phosphorylated carbohydrate dephosphorylation	0.500193	-0.692762	4	1	0.0027248	41701	Ipp
GO:0042401	cellular biogenic amine biosynthetic process	0.500193	-0.692762	4	1	0.0027248	31863	t
GO:0035418	protein localization to synapse	0.500193	-0.692762	4	1	0.0027248	32083	dlg1
GO:0010955	negative regulation of protein processing	0.500193	-0.692762	4	1	0.0027248	39753	Diap1
GO:0051205	protein insertion into membrane	0.500193	-0.692762	4	1	0.0027248	4379884	CG34132
GO:0097090	presynaptic membrane organization	0.500193	-0.692762	4	1	0.0027248	40464	Ten-m
GO:0008063	Toll signaling pathway	0.500193	-0.692762	4	1	0.0027248	42821	Pli
GO:0046348	amino sugar catabolic process	0.500193	-0.692762	4	1	0.0027248	34979	Idgf2
GO:0042135	neurotransmitter catabolic process	0.500193	-0.692762	4	1	0.0027248	39988	CG7430
GO:0050833	pyruvate transmembrane transporter activity	0.500193	-0.692762	4	1	0.0027248	40049	Indy
GO:0006779	porphyrin-containing compound biosynthetic process	0.500193	-0.692762	4	1	0.0027248	46140	l(3)02640
GO:0035090	maintenance of apical/basal cell polarity	0.500193	-0.692762	4	1	0.0027248	43003	veli
GO:0010676	positive regulation of cellular carbohydrate metabolic process	0.500193	-0.692762	4	1	0.0027248	39454	Atg1
GO:0005319	lipid transporter activity	0.500193	-0.692762	4	1	0.0027248	34358	Npc1a
GO:0042744	hydrogen peroxide catabolic process	0.500193	-0.692762	4	1	0.0027248	42109	Prx3
GO:0032496	response to lipopolysaccharide	0.500193	-0.692762	4	1	0.0027248	42428	Stat92E
GO:0010212	response to ionizing radiation	0.500193	-0.692762	4	1	0.0027248	42428	Stat92E
GO:0007623	circadian rhythm	0.503948	-0.685282	48	8	0.0217984	4.55883e+39	Pdp1,dlg1,Ilp2,Ih,Pka-R2,qsm,cu,cry
GO:0055074	calcium ion homeostasis	0.50982	-0.673698	23	4	0.0108992	4.35414e+19	Capa,Cpn,up,Cbp53E
GO:0006874	cellular calcium ion homeostasis	0.50982	-0.673698	23	4	0.0108992	3.69054e+19	Cbp53E,Cpn,up,Capa
GO:0035222	wing disc pattern formation	0.50982	-0.673698	23	4	0.0108992	4.42054e+19	spen,CG1943,gammaSnap1,14-3-3epsilon
GO:0007622	rhythmic behavior	0.511803	-0.669816	42	7	0.0190736	4.70653e+34	qsm,dlg1,Pka-R2,Ilp2,Ih,cry,cu
GO:0030855	epithelial cell differentiation	0.517402	-0.658934	118	19	0.0517711	4.52783e+94	csw,spoon,gus,Pax,spen,Rac2,veli,smt3,alpha-Cat,sn,kst,Stat92E,me31B,RN-tre,Cip4,Diap1,dlg1,E2f1,ct
GO:0042752	regulation of circadian rhythm	0.520912	-0.652174	36	6	0.0163488	3.16073e+29	Pink1,Dh31,homer,Fbxl4,cry,Ih
GO:0097435	supramolecular fiber organization	0.521196	-0.651629	74	12	0.0326975	4.04644e+60	Ten-m,Tbce,bt,Bsg,Rac2,cpa,up,Prm,Mlp60A,FER,sn,ctp
GO:0010259	multicellular organism aging	0.521196	-0.651629	74	12	0.0326975	3.91504e+59	Ilp2,Ih,GLaz,Ide,Tpi,cnc,Indy,Prx3,14-3-3epsilon,sun,alpha-Man-Ia,alph
GO:0032886	regulation of microtubule-based process	0.522955	-0.64826	17	3	0.00817439	4.13924e+16	Jupiter,tacc,futsch
GO:0009612	response to mechanical stimulus	0.522955	-0.64826	17	3	0.00817439	435823122846015	Tpi,tko,tutl
GO:0019935	cyclic-nucleotide-mediated signaling	0.522955	-0.64826	17	3	0.00817439	435413418136041	Capa,Dh31,Pka-R2
GO:0042058	regulation of epidermal growth factor receptor signaling pathway	0.522955	-0.64826	17	3	0.00817439	380593471832083	Ptpmeg,kek4,dlg1
GO:0006366	transcription by RNA polymerase II	0.522955	-0.64826	17	3	0.00817439	363874282240415	spt4,TfIIA-S,Rpb8
GO:0009615	response to virus	0.522955	-0.64826	17	3	0.00817439	361834982136040	Listericin,EbpIII,TER94
GO:0046532	regulation of photoreceptor cell differentiation	0.522955	-0.64826	17	3	0.00817439	413634527843481	pros,csw,alph
GO:0043954	cellular component maintenance	0.522955	-0.64826	17	3	0.00817439	404644139838831	Ten-m,Csk,Rac2
GO:0008354	germ cell migration	0.522955	-0.64826	17	3	0.00817439	397533547842186	Diap1,gus,14-3-3epsilon
GO:0071824	protein-DNA complex subunit organization	0.522955	-0.64826	17	3	0.00817439	428223779837922	TfIIA-S,Nap1,Nurf-38
GO:0001666	response to hypoxia	0.522955	-0.64826	17	3	0.00817439	312284497844936	tko,Tom40,Eip93F
GO:1901184	regulation of ERBB signaling pathway	0.522955	-0.64826	17	3	0.00817439	380593471832083	Ptpmeg,kek4,dlg1
GO:0098660	inorganic ion transmembrane transport	0.527908	-0.638833	87	14	0.0381471	3.67314e+69	Vha14-1,ATPsynbeta,Ca-alpha1D,ATPsyndelta,sun,eag,ClC-a,ATPsyngamma,Vha44,ATPsynCF6,ClC-b,ATPsynG,ATPsynB,Vha16-1
GO:0002064	epithelial cell development	0.528061	-0.638544	106	17	0.0463215	4.05173e+84	alpha-Cat,smt3,kst,me31B,Stat92E,Cip4,RN-tre,dlg1,Diap1,E2f1,ct,spoon,csw,gus,Pax,Rac2,veli
GO:0006629	lipid metabolic process	0.528414	-0.637874	125	20	0.0544959	4.48873e+100	mdy,CG7990,santa-maria,Hydr2,CG14945,CG2201,Npc1a,GLaz,SREBP,Marf,CG17292,CG3961,Ipp,bmm,rdgB,Pdh,mino,Rheb,pdgy,CG9512
GO:0048511	rhythmic process	0.529047	-0.636679	49	8	0.0217984	3.91504e+39	Ilp2,Ih,Pdp1,dlg1,cu,cry,Pka-R2,qsm
GO:0097659	nucleic acid-templated transcription	0.531816	-0.631458	30	5	0.013624	3.63874e+24	spt4,Nurf-38,Rpb8,TfIIA-S,spen
GO:0016079	synaptic vesicle exocytosis	0.531816	-0.631458	30	5	0.013624	3.24704e+24	Scamp,gammaSnap1,Csp,Syngr,Syx1A
GO:0006351	transcription, DNA-templated	0.531816	-0.631458	30	5	0.013624	4.04154e+24	Rpb8,TfIIA-S,spen,spt4,Nurf-38
GO:0034330	cell junction organization	0.538498	-0.618972	43	7	0.0190736	4.13984e+34	Csk,Rac2,CG44325,kst,alpha-Cat,dlg1,awd
GO:1905037	autophagosome organization	0.542355	-0.611835	11	2	0.00544959	3938339454	Atg12,Atg1
GO:0034333	adherens junction assembly	0.542355	-0.611835	11	2	0.00544959	4051738418	alpha-Cat,kst
GO:0043052	thermotaxis	0.542355	-0.611835	11	2	0.00544959	3874634024	ple,santa-maria
GO:0045747	positive regulation of Notch signaling pathway	0.542355	-0.611835	11	2	0.00544959	3884643501	lqf,Kul
GO:0071985	multivesicular body sorting pathway	0.542355	-0.611835	11	2	0.00544959	3841838529	kst,CG15012
GO:1901215	negative regulation of neuron death	0.542355	-0.611835	11	2	0.00544959	574054431607	futsch,Pink1
GO:0050920	regulation of chemotaxis	0.542355	-0.611835	11	2	0.00544959	11733232400	Rheb,NetB
GO:0032509	endosome transport via multivesicular body sorting pathway	0.542355	-0.611835	11	2	0.00544959	3852938418	CG15012,kst
GO:1902667	regulation of axon guidance	0.542355	-0.611835	11	2	0.00544959	11733232400	Rheb,NetB
GO:0035162	embryonic hemopoiesis	0.542355	-0.611835	11	2	0.00544959	3883131717	Rac2,sn
GO:1905114	cell surface receptor signaling pathway involved in cell-cell signaling	0.542355	-0.611835	11	2	0.00544959	4292244289	Pp1alpha-96A,flw
GO:0070328	triglyceride homeostasis	0.542355	-0.611835	11	2	0.00544959	3961139150	bmm,Ilp2
GO:0051294	establishment of spindle orientation	0.542355	-0.611835	11	2	0.00544959	3140532083	ctp,dlg1
GO:0009064	glutamine family amino acid metabolic process	0.542355	-0.611835	11	2	0.00544959	3678236040	Got1,TER94
GO:0065004	protein-DNA complex assembly	0.542355	-0.611835	11	2	0.00544959	4282237798	TfIIA-S,Nap1
GO:0034728	nucleosome organization	0.542355	-0.611835	11	2	0.00544959	3779837922	Nap1,Nurf-38
GO:0036294	cellular response to decreased oxygen levels	0.542355	-0.611835	11	2	0.00544959	4497844936	Tom40,Eip93F
GO:0071407	cellular response to organic cyclic compound	0.542355	-0.611835	11	2	0.00544959	3792233532	Nurf-38,Hydr2
GO:0035099	hemocyte migration	0.542355	-0.611835	11	2	0.00544959	3171738831	sn,Rac2
GO:0002697	regulation of immune effector process	0.545474	-0.6061	24	4	0.0108992	3.39813e+19	smt3,me31B,Pli,Stat92E
GO:1990778	protein localization to cell periphery	0.545474	-0.6061	24	4	0.0108992	4.30033e+20	veli,Bsg,Rab10,Arf79F
GO:0060033	anatomical structure regression	0.545474	-0.6061	24	4	0.0108992	3.60404e+19	TER94,Atg12,ctp,Atg1
GO:0009636	response to toxic substance	0.549184	-0.599322	69	11	0.0299728	4.21093e+56	Prx3,MRP,inaC,Pka-R2,CG17734,alph,homer,Adh,nAChRbeta2,ple,dlg1
GO:0030534	adult behavior	0.549184	-0.599322	69	11	0.0299728	3.87463e+56	ple,dlg1,homer,Adh,SLC5A11,Pka-R2,CG17734,Marf,tutl,Galt,eag
GO:0000122	negative regulation of transcription by RNA polymerase II	0.549552	-0.598651	37	6	0.0163488	3.20834e+29	dlg1,spt4,E2f1,SREBP,pros,ct
GO:0043254	regulation of protein complex assembly	0.549552	-0.598651	37	6	0.0163488	3.35513e+31	conu,cpa,chinmo,Cip4,spoon,Jupiter
GO:0042592	homeostatic process	0.556536	-0.586024	184	29	0.0790191	4.35824e+145	Tpi,Csp,Arr1,SREBP,CG11077,up,Nap1,smt3,TER94,mbl,CG7430,Pgk,cnc,Ho,Cbp53E,Rheb,Ilp2,Cpn,PyK,Csk,Galt,MtnA,Capa,Atg1,PHGPx,ClC-a,bmm,Arr2,Prx3
GO:0006836	neurotransmitter transport	0.557659	-0.584007	63	10	0.027248	3.40494e+49	CG13795,gammaSnap1,lqf,Scamp,Syx1A,Csp,Syngr,veli,Arf79F,CG13794
GO:0065003	protein-containing complex assembly	0.559875	-0.580042	127	20	0.0544959	4.20205e+99	CG10340,RpL12,RpS15,RpL6,Tom20,eag,gammaSnap1,Sirup,mRpS7,COX6B,RpL3,TfIIA-S,bt,ND-23,RpL24-like,Nap1,UQCR-14,me31B,ND-B12,Tbce
GO:0007568	aging	0.561483	-0.577174	76	12	0.0326975	3.64474e+59	GLaz,Ih,Ilp2,Tpi,Ide,sun,14-3-3epsilon,Prx3,cnc,Indy,alph,alpha-Man-Ia
GO:0048149	behavioral response to ethanol	0.562897	-0.574659	31	5	0.013624	3.39444e+26	homer,Adh,dlg1,Pka-R2,CG17734
GO:0055088	lipid homeostasis	0.562897	-0.574659	31	5	0.013624	3.39811e+25	smt3,Rheb,Ilp2,bmm,SREBP
GO:0032774	RNA biosynthetic process	0.562897	-0.574659	31	5	0.013624	4.04154e+24	Rpb8,spen,TfIIA-S,Nurf-38,spt4
GO:0072659	protein localization to plasma membrane	0.56383	-0.573002	18	3	0.00817439	4050633025318840	Arf79F,Rab10,Bsg
GO:0048608	reproductive structure development	0.56383	-0.573002	18	3	0.00817439	368974454041181	inaC,ct,hyd
GO:0008088	axo-dendritic transport	0.56383	-0.573002	18	3	0.00817439	3.94546e+16	Atg1,futsch,Marf
GO:0061458	reproductive system development	0.56383	-0.573002	18	3	0.00817439	368974118144540	inaC,hyd,ct
GO:0009063	cellular amino acid catabolic process	0.56383	-0.573002	18	3	0.00817439	3.35507e+16	CG17691,TER94,CG7430
GO:0007015	actin filament organization	0.564589	-0.571658	44	7	0.0190736	3.73874e+34	cpa,Rac2,ctp,up,sn,bt,FER
GO:0061024	membrane organization	0.572822	-0.55718	83	13	0.0354223	4.14504e+66	Tango9,kst,Tom20,csw,crq,TER94,Syx1A,CG34132,Vamp7,Ten-m,Cip4,mino,Arf79F
GO:0001709	cell fate determination	0.577401	-0.549218	38	6	0.0163488	4.13634e+29	pros,BicD,cpa,14-3-3epsilon,spen,dlg1
GO:0006470	protein dephosphorylation	0.577401	-0.549218	38	6	0.0163488	4.42895e+29	flw,csw,alph,Ptpmeg,CG3632,Pp1alpha-96A
GO:0032103	positive regulation of response to external stimulus	0.577401	-0.549218	38	6	0.0163488	3.61833e+30	Listericin,smt3,Ide,Pp1alpha-96A,Pli,Rheb
GO:0051129	negative regulation of cellular component organization	0.577753	-0.548609	51	8	0.0217984	4.05893e+39	tacc,spoon,hyd,Tango9,Pink1,Cip4,pros,cpa
GO:0007269	neurotransmitter secretion	0.577753	-0.548609	51	8	0.0217984	4.05064e+39	Arf79F,Syngr,veli,Syx1A,Csp,Scamp,lqf,gammaSnap1
GO:0099643	signal release from synapse	0.577753	-0.548609	51	8	0.0217984	3.88464e+39	lqf,gammaSnap1,Arf79F,Scamp,Csp,Syx1A,Syngr,veli
GO:0008049	male courtship behavior	0.579743	-0.545171	25	4	0.0108992	3.20834e+19	dlg1,ple,tko,pros
GO:0072507	divalent inorganic cation homeostasis	0.579743	-0.545171	25	4	0.0108992	3.69054e+19	Cbp53E,Cpn,up,Capa
GO:0050657	nucleic acid transport	0.579743	-0.545171	25	4	0.0108992	3.35492e+21	Dbp80,Tom20,Vha16-1,BicD
GO:0072503	cellular divalent inorganic cation homeostasis	0.579743	-0.545171	25	4	0.0108992	4.35414e+19	Capa,Cpn,up,Cbp53E
GO:0006338	chromatin remodeling	0.579743	-0.545171	25	4	0.0108992	4.35594e+19	Nph,Nurf-38,Nap1,Nlp
GO:0050658	RNA transport	0.579743	-0.545171	25	4	0.0108992	3.35492e+21	Dbp80,BicD,Vha16-1,Tom20
GO:0010970	transport along microtubule	0.579743	-0.545171	25	4	0.0108992	3.94543e+21	Atg1,Pink1,Marf,futsch
GO:0070897	transcription preinitiation complex assembly	0.579841	-0.545002	5	1	0.0027248	42822	TfIIA-S
GO:0030382	sperm mitochondrion organization	0.579841	-0.545002	5	1	0.0027248	31607	Pink1
GO:0036315	cellular response to sterol	0.579841	-0.545002	5	1	0.0027248	37922	Nurf-38
GO:0007414	axonal defasciculation	0.579841	-0.545002	5	1	0.0027248	46015	tutl
GO:0031033	myosin filament organization	0.579841	-0.545002	5	1	0.0027248	43814	bt
GO:0006334	nucleosome assembly	0.579841	-0.545002	5	1	0.0027248	37798	Nap1
GO:0046673	negative regulation of compound eye retinal cell programmed cell death	0.579841	-0.545002	5	1	0.0027248	39753	Diap1
GO:0001941	postsynaptic membrane organization	0.579841	-0.545002	5	1	0.0027248	40464	Ten-m
GO:0004402	histone acetyltransferase activity	0.579841	-0.545002	5	1	0.0027248	32318	tth
GO:0040013	negative regulation of locomotion	0.579841	-0.545002	5	1	0.0027248	38059	Ptpmeg
GO:0046669	regulation of compound eye retinal cell programmed cell death	0.579841	-0.545002	5	1	0.0027248	39753	Diap1
GO:1990834	response to odorant	0.579841	-0.545002	5	1	0.0027248	37311	Obp57c
GO:0031034	myosin filament assembly	0.579841	-0.545002	5	1	0.0027248	43814	bt
GO:0014059	regulation of dopamine secretion	0.579841	-0.545002	5	1	0.0027248	36589	Ih
GO:0016335	morphogenesis of larval imaginal disc epithelium	0.579841	-0.545002	5	1	0.0027248	32083	dlg1
GO:0046068	cGMP metabolic process	0.579841	-0.545002	5	1	0.0027248	35107	Pde11
GO:0060147	regulation of posttranscriptional gene silencing	0.579841	-0.545002	5	1	0.0027248	34364	me31B
GO:0000077	DNA damage checkpoint	0.579841	-0.545002	5	1	0.0027248	42186	14-3-3epsilon
GO:0043407	negative regulation of MAP kinase activity	0.579841	-0.545002	5	1	0.0027248	43481	alph
GO:0033619	membrane protein proteolysis	0.579841	-0.545002	5	1	0.0027248	43501	Kul
GO:0110118	negative regulation of compound eye photoreceptor cell differentiation	0.579841	-0.545002	5	1	0.0027248	43481	alph
GO:0007007	inner mitochondrial membrane organization	0.579841	-0.545002	5	1	0.0027248	4379884	CG34132
GO:0016336	establishment or maintenance of polarity of larval imaginal disc epithelium	0.579841	-0.545002	5	1	0.0027248	32083	dlg1
GO:1905475	regulation of protein localization to membrane	0.579841	-0.545002	5	1	0.0027248	33981	smt3
GO:0071897	DNA biosynthetic process	0.579841	-0.545002	5	1	0.0027248	42550	E2f1
GO:0006414	translational elongation	0.579841	-0.545002	5	1	0.0027248	34363	eEF1delta
GO:0003383	apical constriction	0.579841	-0.545002	5	1	0.0027248	40517	alpha-Cat
GO:0046671	negative regulation of retinal cell programmed cell death	0.579841	-0.545002	5	1	0.0027248	39753	Diap1
GO:0002052	positive regulation of neuroblast proliferation	0.579841	-0.545002	5	1	0.0027248	41363	pros
GO:1901655	cellular response to ketone	0.579841	-0.545002	5	1	0.0027248	37922	Nurf-38
GO:0050433	regulation of catecholamine secretion	0.579841	-0.545002	5	1	0.0027248	36589	Ih
GO:0051156	glucose 6-phosphate metabolic process	0.579841	-0.545002	5	1	0.0027248	37804	Taldo
GO:0043281	regulation of cysteine-type endopeptidase activity involved in apoptotic process	0.579841	-0.545002	5	1	0.0027248	39753	Diap1
GO:0043650	dicarboxylic acid biosynthetic process	0.579841	-0.545002	5	1	0.0027248	36782	Got1
GO:0042451	purine nucleoside biosynthetic process	0.579841	-0.545002	5	1	0.0027248	43739	awd
GO:2000179	positive regulation of neural precursor cell proliferation	0.579841	-0.545002	5	1	0.0027248	41363	pros
GO:0002237	response to molecule of bacterial origin	0.579841	-0.545002	5	1	0.0027248	42428	Stat92E
GO:0048079	regulation of cuticle pigmentation	0.579841	-0.545002	5	1	0.0027248	38746	ple
GO:0008078	mesodermal cell migration	0.579841	-0.545002	5	1	0.0027248	38831	Rac2
GO:0098586	cellular response to virus	0.579841	-0.545002	5	1	0.0027248	36040	TER94
GO:0070373	negative regulation of ERK1 and ERK2 cascade	0.579841	-0.545002	5	1	0.0027248	43481	alph
GO:0009163	nucleoside biosynthetic process	0.579841	-0.545002	5	1	0.0027248	43739	awd
GO:0051181	cofactor transport	0.579841	-0.545002	5	1	0.0027248	31380	CG3556
GO:0015740	C4-dicarboxylate transport	0.579841	-0.545002	5	1	0.0027248	40049	Indy
GO:0043113	receptor clustering	0.579841	-0.545002	5	1	0.0027248	32083	dlg1
GO:0031629	synaptic vesicle fusion to presynaptic active zone membrane	0.579841	-0.545002	5	1	0.0027248	42854	Syx1A
GO:0030720	oocyte localization involved in germarium-derived egg chamber formation	0.579841	-0.545002	5	1	0.0027248	42428	Stat92E
GO:0007062	sister chromatid cohesion	0.579841	-0.545002	5	1	0.0027248	44724	san
GO:0071390	cellular response to ecdysone	0.579841	-0.545002	5	1	0.0027248	37922	Nurf-38
GO:0030725	germline ring canal formation	0.579841	-0.545002	5	1	0.0027248	44289	flw
GO:1905269	positive regulation of chromatin organization	0.579841	-0.545002	5	1	0.0027248	42428	Stat92E
GO:0046785	microtubule polymerization	0.579841	-0.545002	5	1	0.0027248	35532	Tbce
GO:0009996	negative regulation of cell fate specification	0.579841	-0.545002	5	1	0.0027248	38846	lqf
GO:0033301	cell cycle comprising mitosis without cytokinesis	0.579841	-0.545002	5	1	0.0027248	33981	smt3
GO:0046129	purine ribonucleoside biosynthetic process	0.579841	-0.545002	5	1	0.0027248	43739	awd
GO:0051952	regulation of amine transport	0.579841	-0.545002	5	1	0.0027248	36589	Ih
GO:0045167	asymmetric protein localization involved in cell fate determination	0.579841	-0.545002	5	1	0.0027248	32083	dlg1
GO:0006261	DNA-dependent DNA replication	0.579841	-0.545002	5	1	0.0027248	42550	E2f1
GO:0099500	vesicle fusion to plasma membrane	0.579841	-0.545002	5	1	0.0027248	42854	Syx1A
GO:0006206	pyrimidine nucleobase metabolic process	0.579841	-0.545002	5	1	0.0027248	39396	Adk1
GO:0045610	regulation of hemocyte differentiation	0.579841	-0.545002	5	1	0.0027248	35688	Cyt-b5
GO:0042455	ribonucleoside biosynthetic process	0.579841	-0.545002	5	1	0.0027248	43739	awd
GO:0046668	regulation of retinal cell programmed cell death	0.579841	-0.545002	5	1	0.0027248	39753	Diap1
GO:0071901	negative regulation of protein serine/threonine kinase activity	0.579841	-0.545002	5	1	0.0027248	43481	alph
GO:0110020	regulation of actomyosin structure organization	0.579841	-0.545002	5	1	0.0027248	44289	flw
GO:0060438	trachea development	0.579841	-0.545002	5	1	0.0027248	41876	Ccm3
GO:0008343	adult feeding behavior	0.579841	-0.545002	5	1	0.0027248	34117	SLC5A11
GO:0006661	phosphatidylinositol biosynthetic process	0.579841	-0.545002	5	1	0.0027248	32909	CG7990
GO:0014866	skeletal myofibril assembly	0.579841	-0.545002	5	1	0.0027248	32314	up
GO:0048148	behavioral response to cocaine	0.579841	-0.545002	5	1	0.0027248	36041	Pka-R2
GO:0015078	proton transmembrane transporter activity	0.579841	-0.545002	5	1	0.0027248	42759	ATPsynCF6
GO:1990928	response to amino acid starvation	0.579841	-0.545002	5	1	0.0027248	39150	Ilp2
GO:0060964	regulation of gene silencing by miRNA	0.579841	-0.545002	5	1	0.0027248	34364	me31B
GO:0046533	negative regulation of photoreceptor cell differentiation	0.579841	-0.545002	5	1	0.0027248	43481	alph
GO:0071322	cellular response to carbohydrate stimulus	0.579841	-0.545002	5	1	0.0027248	39150	Ilp2
GO:1901659	glycosyl compound biosynthetic process	0.579841	-0.545002	5	1	0.0027248	43739	awd
GO:1904059	regulation of locomotor rhythm	0.579841	-0.545002	5	1	0.0027248	31607	Pink1
GO:0016477	cell migration	0.583362	-0.538948	90	14	0.0381471	3.97534e+69	Diap1,RN-tre,veli,Csk,Rac2,csw,spoon,awd,inaC,NetB,Stat92E,14-3-3epsilon,sn,gus
GO:0051493	regulation of cytoskeleton organization	0.589536	-0.528419	58	9	0.0245232	5.74054e+48	futsch,Cip4,conu,cpa,chinmo,tacc,spoon,Jupiter,flw
GO:0046677	response to antibiotic	0.589993	-0.527644	45	7	0.0190736	3.77188e+36	Adh,homer,ple,dlg1,inaC,Pka-R2,CG17734
GO:0042440	pigment metabolic process	0.589993	-0.527644	45	7	0.0190736	3.88313e+34	Rac2,santa-maria,Hexo1,alpha-Man-IIb,l(3)02640,ninaA,Ho
GO:0032446	protein modification by small protein conjugation	0.590234	-0.527237	71	11	0.0299728	3.91335e+54	Ubc4,poe,godzilla,smt3,hyd,Bruce,RpS27A,CG11658,Fbxl4,Diap1,Pli
GO:0097306	cellular response to alcohol	0.591711	-0.524737	12	2	0.00544959	3792236041	Nurf-38,Pka-R2
GO:0009743	response to carbohydrate	0.591711	-0.524737	12	2	0.00544959	4262039150	PyK,Ilp2
GO:0071453	cellular response to oxygen levels	0.591711	-0.524737	12	2	0.00544959	4493644978	Eip93F,Tom40
GO:1903432	regulation of TORC1 signaling	0.591711	-0.524737	12	2	0.00544959	42550117332	E2f1,Rheb
GO:0031146	SCF-dependent proteasomal ubiquitin-dependent protein catabolic process	0.591711	-0.524737	12	2	0.00544959	3931932378	CG11658,Fbxl4
GO:0009826	unidimensional cell growth	0.591711	-0.524737	12	2	0.00544959	3883141118	Rac2,FER
GO:0046474	glycerophospholipid biosynthetic process	0.591711	-0.524737	12	2	0.00544959	3541732909	CG2201,CG7990
GO:0061525	hindgut development	0.591711	-0.524737	12	2	0.00544959	4242844540	Stat92E,ct
GO:0007442	hindgut morphogenesis	0.591711	-0.524737	12	2	0.00544959	4454042428	ct,Stat92E
GO:0055090	acylglycerol homeostasis	0.591711	-0.524737	12	2	0.00544959	3915039611	Ilp2,bmm
GO:0007465	R7 cell fate commitment	0.591711	-0.524737	12	2	0.00544959	4527841363	csw,pros
GO:0004672	protein kinase activity	0.592907	-0.522718	32	5	0.013624	4.38144e+24	bt,Atg1,CG31145,Dyrk2,Pink1
GO:0045055	regulated exocytosis	0.592907	-0.522718	32	5	0.013624	3.24704e+24	Scamp,gammaSnap1,Syngr,Csp,Syx1A
GO:0051656	establishment of organelle localization	0.601222	-0.50879	52	8	0.0217984	3.20833e+39	dlg1,Pink1,Syngr,BicD,flw,Marf,tacc,ctp
GO:0061061	muscle structure development	0.601259	-0.508729	91	14	0.0381471	3.34614e+70	Pgk,Stat92E,Mlp60A,Mp20,mbl,Prm,bt,Bsg,Pglym78,Rac2,PyK,up,Tpi,dock
GO:0035010	encapsulation of foreign target	0.602502	-0.506664	19	3	0.00817439	319573883141913	alpha-Man-Ia,Rac2,alpha-Man-IIb
GO:0048103	somatic stem cell division	0.602502	-0.506664	19	3	0.00817439	367934136342428	clu,pros,Stat92E
GO:0046488	phosphatidylinositol metabolic process	0.602502	-0.506664	19	3	0.00817439	329094170132340	CG7990,Ipp,rdgB
GO:0035316	non-sensory hair organization	0.602502	-0.506664	19	3	0.00817439	385344420531717	Cip4,spen,sn
GO:0045879	negative regulation of smoothened signaling pathway	0.602502	-0.506664	19	3	0.00817439	442894014842922	flw,Gbeta76C,Pp1alpha-96A
GO:0045185	maintenance of protein location	0.602502	-0.506664	19	3	0.00817439	352154218640517	Pax,14-3-3epsilon,alpha-Cat
GO:0043409	negative regulation of MAPK cascade	0.602502	-0.506664	19	3	0.00817439	373874348144289	cpa,alph,flw
GO:0016325	oocyte microtubule cytoskeleton organization	0.602502	-0.506664	19	3	0.00817439	427433505142186	cnc,BicD,14-3-3epsilon
GO:0018205	peptidyl-lysine modification	0.602502	-0.506664	19	3	0.00817439	339814472432318	smt3,san,tth
GO:0035315	hair cell differentiation	0.602502	-0.506664	19	3	0.00817439	385344420531717	Cip4,spen,sn
GO:0006633	fatty acid biosynthetic process	0.602502	-0.506664	19	3	0.00817439	335324005640155	Hydr2,CG3961,SREBP
GO:0035317	imaginal disc-derived wing hair organization	0.602502	-0.506664	19	3	0.00817439	317173853444205	sn,Cip4,spen
GO:0090174	organelle membrane fusion	0.602502	-0.506664	19	3	0.00817439	428543601536040	Syx1A,Vamp7,TER94
GO:0044242	cellular lipid catabolic process	0.602502	-0.506664	19	3	0.00817439	396113242633532	bmm,pdgy,Hydr2
GO:0051236	establishment of RNA localization	0.61249	-0.490223	26	4	0.0108992	4.01894e+21	Tom20,BicD,Vha16-1,Dbp80
GO:0000381	regulation of alternative mRNA splicing, via spliceosome	0.61249	-0.490223	26	4	0.0108992	3.14424e+21	snf,mbl,Rox8,CG17454
GO:0099111	microtubule-based transport	0.61249	-0.490223	26	4	0.0108992	3.94543e+21	Atg1,Marf,Pink1,futsch
GO:0033500	carbohydrate homeostasis	0.61249	-0.490223	26	4	0.0108992	4.35823e+19	Tpi,Galt,Ilp2,PyK
GO:0010243	response to organonitrogen compound	0.614641	-0.486717	46	7	0.0190736	4.07913e+35	godzilla,Rab10,Pka-R2,Rheb,Ilp2,PyK,Ilp6
GO:0040012	regulation of locomotion	0.614641	-0.486717	46	7	0.0190736	3.39441e+35	homer,Rheb,Ptpmeg,NetB,Ten-m,Diap1,ple
GO:0009266	response to temperature stimulus	0.614641	-0.486717	46	7	0.0190736	3.41814e+34	Dh31,Ptpmeg,santa-maria,CG7409,Hsc70-5,spoon,ple
GO:1901698	response to nitrogen compound	0.614641	-0.486717	46	7	0.0190736	3.60414e+35	Pka-R2,godzilla,Rab10,PyK,Ilp6,Rheb,Ilp2
GO:0042493	response to drug	0.619303	-0.47916	79	12	0.0326975	3.87463e+61	ple,dlg1,CG3556,glob1,Adh,homer,alpha-Man-Ia,inaC,Pka-R2,CG17734,rtp,Indy
GO:0009719	response to endogenous stimulus	0.620814	-0.476723	66	10	0.027248	3.35324e+50	Hydr2,Chd64,smt3,csw,Nurf-38,Ilp6,PyK,Rheb,Ilp2,Rab10
GO:0055002	striated muscle cell development	0.621746	-0.475223	33	5	0.013624	3.90024e+25	Prm,bt,Bsg,Mlp60A,up
GO:0002252	immune effector process	0.621746	-0.475223	33	5	0.013624	4.19134e+24	alpha-Man-IIb,Rac2,crq,alpha-Man-Ia,Listericin
GO:0006631	fatty acid metabolic process	0.621746	-0.475223	33	5	0.013624	3.35324e+24	Hydr2,SREBP,pdgy,CG3961,mino
GO:1901605	alpha-amino acid metabolic process	0.621746	-0.475223	33	5	0.013624	3.60404e+25	TER94,ple,Adi1,Got1,CG7430
GO:0007525	somatic muscle development	0.621746	-0.475223	33	5	0.013624	4.35824e+24	Tpi,Stat92E,Pgk,Pglym78,PyK
GO:0055001	muscle cell development	0.621746	-0.475223	33	5	0.013624	3.78533e+25	Mlp60A,Bsg,bt,up,Prm
GO:0055065	metal ion homeostasis	0.630376	-0.461438	40	6	0.0163488	4.14074e+29	Ho,Cbp53E,MtnA,Capa,Cpn,up
GO:0042391	regulation of membrane potential	0.630376	-0.461438	40	6	0.0163488	3.16074e+31	Pink1,nAChRbeta2,Hsc70-5,inaF-B,Ih,eag
GO:0035335	peptidyl-tyrosine dephosphorylation	0.636991	-0.451	13	2	0.00544959	3258938059	CG3632,Ptpmeg
GO:0060537	muscle tissue development	0.636991	-0.451	13	2	0.00544959	4428937853	flw,Mlp60A
GO:0042059	negative regulation of epidermal growth factor receptor signaling pathway	0.636991	-0.451	13	2	0.00544959	3471838059	kek4,Ptpmeg
GO:0007052	mitotic spindle organization	0.636991	-0.451	13	2	0.00544959	3398140589	smt3,tacc
GO:0048102	autophagic cell death	0.636991	-0.451	13	2	0.00544959	3140533219	ctp,crq
GO:0006749	glutathione metabolic process	0.636991	-0.451	13	2	0.00544959	4150337111	GstD1,GstE6
GO:0007029	endoplasmic reticulum organization	0.636991	-0.451	13	2	0.00544959	3604031581	TER94,Marf
GO:1900424	regulation of defense response to bacterium	0.636991	-0.451	13	2	0.00544959	3618342821	Listericin,Pli
GO:1901185	negative regulation of ERBB signaling pathway	0.636991	-0.451	13	2	0.00544959	3805934718	Ptpmeg,kek4
GO:0110111	negative regulation of animal organ morphogenesis	0.636991	-0.451	13	2	0.00544959	3975343481	Diap1,alph
GO:0007112	male meiosis cytokinesis	0.636991	-0.451	13	2	0.00544959	4050641181	Arf79F,hyd
GO:0035017	cuticle pattern formation	0.636991	-0.451	13	2	0.00544959	3171735478	sn,gus
GO:0045665	negative regulation of neuron differentiation	0.636991	-0.451	13	2	0.00544959	4348141363	alph,pros
GO:0072329	monocarboxylic acid catabolic process	0.636991	-0.451	13	2	0.00544959	3353236040	Hydr2,TER94
GO:0004725	protein tyrosine phosphatase activity	0.636991	-0.451	13	2	0.00544959	3805932589	Ptpmeg,CG3632
GO:0009116	nucleoside metabolic process	0.636991	-0.451	13	2	0.00544959	3208343739	dlg1,awd
GO:0046777	protein autophosphorylation	0.636991	-0.451	13	2	0.00544959	3945443739	Atg1,awd
GO:1901657	glycosyl compound metabolic process	0.636991	-0.451	13	2	0.00544959	3208343739	dlg1,awd
GO:0046165	alcohol biosynthetic process	0.636991	-0.451	13	2	0.00544959	3158133137	Marf,l(1)G0196
GO:0040001	establishment of mitotic spindle localization	0.636991	-0.451	13	2	0.00544959	3140532083	ctp,dlg1
GO:0031503	protein-containing complex localization	0.636991	-0.451	13	2	0.00544959	335491932083	Dbp80,dlg1
GO:0008592	regulation of Toll signaling pathway	0.636991	-0.451	13	2	0.00544959	4282133981	Pli,smt3
GO:0098662	inorganic cation transmembrane transport	0.637738	-0.449827	80	12	0.0326975	4.38294e+59	ATPsynbeta,Vha14-1,eag,ATPsyndelta,sun,Ca-alpha1D,ATPsynCF6,Vha44,ATPsyngamma,Vha16-1,ATPsynB,ATPsynG
GO:0051961	negative regulation of nervous system development	0.638473	-0.448676	47	7	0.0190736	4.14324e+34	COX5A,pros,alph,CG5214,UQCR-14,CG7834,Cip4
GO:0006887	exocytosis	0.638473	-0.448676	47	7	0.0190736	3.65334e+34	Syngr,Csp,Syx1A,Scamp,gammaSnap1,Rab10,Vamp7
GO:0060968	regulation of gene silencing	0.638848	-0.448089	20	3	0.00817439	439243436441027	jim,me31B,CG8036
GO:0007450	dorsal/ventral pattern formation, imaginal disc	0.638848	-0.448089	20	3	0.00817439	378424218640844	gammaSnap1,14-3-3epsilon,CG1943
GO:0006913	nucleocytoplasmic transport	0.638848	-0.448089	20	3	0.00817439	3.33433e+16	chinmo,Dbp80,Karybeta3
GO:0048190	wing disc dorsal/ventral pattern formation	0.638848	-0.448089	20	3	0.00817439	378424218640844	gammaSnap1,14-3-3epsilon,CG1943
GO:0090150	establishment of protein localization to membrane	0.638848	-0.448089	20	3	0.00817439	4.05064e+16	Arf79F,Sec63,CG34132
GO:0051169	nuclear transport	0.638848	-0.448089	20	3	0.00817439	3.33434e+16	chinmo,Karybeta3,Dbp80
GO:1905881	positive regulation of oogenesis	0.638848	-0.448089	20	3	0.00817439	394544255039753	Atg1,E2f1,Diap1
GO:0140029	exocytic process	0.638848	-0.448089	20	3	0.00817439	330253784242854	Rab10,gammaSnap1,Syx1A
GO:0061245	establishment or maintenance of bipolar cell polarity	0.638848	-0.448089	20	3	0.00817439	320834139843003	dlg1,Csk,veli
GO:0009913	epidermal cell differentiation	0.638848	-0.448089	20	3	0.00817439	385344420531717	Cip4,spen,sn
GO:0035088	establishment or maintenance of apical/basal cell polarity	0.638848	-0.448089	20	3	0.00817439	320834139843003	dlg1,Csk,veli
GO:0050770	regulation of axonogenesis	0.643617	-0.440651	27	4	0.0108992	1.17332e+20	Rheb,Rac2,pros,NetB
GO:0060179	male mating behavior	0.643617	-0.440651	27	4	0.0108992	3.87463e+19	ple,dlg1,tko,pros
GO:0030705	cytoskeleton-dependent intracellular transport	0.643617	-0.440651	27	4	0.0108992	5.74054e+21	futsch,Pink1,Marf,Atg1
GO:0007629	flight behavior	0.646825	-0.435679	6	1	0.0027248	46015	tutl
GO:0042675	compound eye cone cell differentiation	0.646825	-0.435679	6	1	0.0027248	41363	pros
GO:0062013	positive regulation of small molecule metabolic process	0.646825	-0.435679	6	1	0.0027248	39454	Atg1
GO:0035264	multicellular organism growth	0.646825	-0.435679	6	1	0.0027248	117332	Rheb
GO:0031056	regulation of histone modification	0.646825	-0.435679	6	1	0.0027248	41181	hyd
GO:0006383	transcription by RNA polymerase III	0.646825	-0.435679	6	1	0.0027248	40415	Rpb8
GO:0006855	drug transmembrane transport	0.646825	-0.435679	6	1	0.0027248	40049	Indy
GO:0042632	cholesterol homeostasis	0.646825	-0.435679	6	1	0.0027248	117332	Rheb
GO:0007362	terminal region determination	0.646825	-0.435679	6	1	0.0027248	45278	csw
GO:0007295	growth of a germarium-derived egg chamber	0.646825	-0.435679	6	1	0.0027248	33025	Rab10
GO:0009168	purine ribonucleoside monophosphate biosynthetic process	0.646825	-0.435679	6	1	0.0027248	42973	CG11089
GO:0035002	liquid clearance, open tracheal system	0.646825	-0.435679	6	1	0.0027248	43420	wat
GO:0007318	pole plasm protein localization	0.646825	-0.435679	6	1	0.0027248	32083	dlg1
GO:0045785	positive regulation of cell adhesion	0.646825	-0.435679	6	1	0.0027248	40464	Ten-m
GO:0051668	localization within membrane	0.646825	-0.435679	6	1	0.0027248	32083	dlg1
GO:0048018	receptor ligand activity	0.646825	-0.435679	6	1	0.0027248	39150	Ilp2
GO:0043153	entrainment of circadian clock by photoperiod	0.646825	-0.435679	6	1	0.0027248	42305	cry
GO:0045186	zonula adherens assembly	0.646825	-0.435679	6	1	0.0027248	38418	kst
GO:0035265	organ growth	0.646825	-0.435679	6	1	0.0027248	41181	hyd
GO:0031570	DNA integrity checkpoint	0.646825	-0.435679	6	1	0.0027248	42186	14-3-3epsilon
GO:0000462	maturation of SSU-rRNA from tricistronic rRNA transcript (SSU-rRNA, 5.8S rRNA, LSU-rRNA)	0.646825	-0.435679	6	1	0.0027248	43532	RpS8
GO:1900150	regulation of defense response to fungus	0.646825	-0.435679	6	1	0.0027248	42821	Pli
GO:0042478	regulation of eye photoreceptor cell development	0.646825	-0.435679	6	1	0.0027248	45278	csw
GO:0050766	positive regulation of phagocytosis	0.646825	-0.435679	6	1	0.0027248	36381	ClC-b
GO:0008348	negative regulation of antimicrobial humoral response	0.646825	-0.435679	6	1	0.0027248	42428	Stat92E
GO:0042386	hemocyte differentiation	0.646825	-0.435679	6	1	0.0027248	42428	Stat92E
GO:0001101	response to acid chemical	0.646825	-0.435679	6	1	0.0027248	40931	wtrw
GO:0061951	establishment of protein localization to plasma membrane	0.646825	-0.435679	6	1	0.0027248	40506	Arf79F
GO:0006937	regulation of muscle contraction	0.646825	-0.435679	6	1	0.0027248	32314	up
GO:0046112	nucleobase biosynthetic process	0.646825	-0.435679	6	1	0.0027248	39396	Adk1
GO:0032368	regulation of lipid transport	0.646825	-0.435679	6	1	0.0027248	34358	Npc1a
GO:0009127	purine nucleoside monophosphate biosynthetic process	0.646825	-0.435679	6	1	0.0027248	42973	CG11089
GO:0071166	ribonucleoprotein complex localization	0.646825	-0.435679	6	1	0.0027248	3354919	Dbp80
GO:0070252	actin-mediated cell contraction	0.646825	-0.435679	6	1	0.0027248	40517	alpha-Cat
GO:2000300	regulation of synaptic vesicle exocytosis	0.646825	-0.435679	6	1	0.0027248	35051	BicD
GO:0051865	protein autoubiquitination	0.646825	-0.435679	6	1	0.0027248	39753	Diap1
GO:0035019	somatic stem cell population maintenance	0.646825	-0.435679	6	1	0.0027248	42428	Stat92E
GO:0050921	positive regulation of chemotaxis	0.646825	-0.435679	6	1	0.0027248	117332	Rheb
GO:0071426	ribonucleoprotein complex export from nucleus	0.646825	-0.435679	6	1	0.0027248	3354919	Dbp80
GO:0000289	nuclear-transcribed mRNA poly(A) tail shortening	0.646825	-0.435679	6	1	0.0027248	41339	cu
GO:0042136	neurotransmitter biosynthetic process	0.646825	-0.435679	6	1	0.0027248	31863	t
GO:0009065	glutamine family amino acid catabolic process	0.646825	-0.435679	6	1	0.0027248	36040	TER94
GO:0002921	negative regulation of humoral immune response	0.646825	-0.435679	6	1	0.0027248	42428	Stat92E
GO:2000648	positive regulation of stem cell proliferation	0.646825	-0.435679	6	1	0.0027248	41363	pros
GO:2001233	regulation of apoptotic signaling pathway	0.646825	-0.435679	6	1	0.0027248	41450	Tango9
GO:0044706	multi-multicellular organism process	0.646825	-0.435679	6	1	0.0027248	39392	Est-6
GO:0007446	imaginal disc growth	0.646825	-0.435679	6	1	0.0027248	41181	hyd
GO:0007354	zygotic determination of anterior/posterior axis, embryo	0.646825	-0.435679	6	1	0.0027248	45278	csw
GO:2000116	regulation of cysteine-type endopeptidase activity	0.646825	-0.435679	6	1	0.0027248	39753	Diap1
GO:0045314	regulation of compound eye photoreceptor development	0.646825	-0.435679	6	1	0.0027248	45278	csw
GO:1902669	positive regulation of axon guidance	0.646825	-0.435679	6	1	0.0027248	117332	Rheb
GO:0090257	regulation of muscle system process	0.646825	-0.435679	6	1	0.0027248	32314	up
GO:0006360	transcription by RNA polymerase I	0.646825	-0.435679	6	1	0.0027248	40415	Rpb8
GO:0043063	intercellular bridge organization	0.646825	-0.435679	6	1	0.0027248	44289	flw
GO:0006613	cotranslational protein targeting to membrane	0.646825	-0.435679	6	1	0.0027248	38819	Sec63
GO:0008535	respiratory chain complex IV assembly	0.646825	-0.435679	6	1	0.0027248	32989	COX6B
GO:0034614	cellular response to reactive oxygen species	0.646825	-0.435679	6	1	0.0027248	34089	Sirup
GO:0006026	aminoglycan catabolic process	0.646825	-0.435679	6	1	0.0027248	34979	Idgf2
GO:0006260	DNA replication	0.646825	-0.435679	6	1	0.0027248	42550	E2f1
GO:0006614	SRP-dependent cotranslational protein targeting to membrane	0.646825	-0.435679	6	1	0.0027248	38819	Sec63
GO:0030100	regulation of endocytosis	0.64934	-0.431799	34	5	0.013624	3.50515e+24	BicD,Pkc53E,Arf79F,inaC,crq
GO:0010817	regulation of hormone levels	0.64934	-0.431799	34	5	0.013624	3.24194e+24	CG9512,Est-6,Marf,Npc1a,Pdh
GO:0007298	border follicle cell migration	0.64934	-0.431799	34	5	0.013624	3.65543e+24	RN-tre,spoon,Diap1,Stat92E,veli
GO:0009267	cellular response to starvation	0.64934	-0.431799	34	5	0.013624	3.93834e+24	Atg12,Bruce,Atg1,GLaz,Ilp6
GO:0006325	chromatin organization	0.653359	-0.425628	61	9	0.0245232	3.77983e+44	Nap1,tth,spt4,Nlp,snf,mamo,Nurf-38,san,Nph
GO:0006897	endocytosis	0.66026	-0.415122	68	10	0.027248	3.89934e+49	Arr2,Atg1,kst,crq,csw,lqf,Tsp42Ej,BicD,Arr1,Arf79F
GO:0016567	protein ubiquitination	0.66026	-0.415122	68	10	0.027248	4.62434e+49	poe,godzilla,Ubc4,Fbxl4,CG11658,RpS27A,hyd,Bruce,Diap1,Pli
GO:1903047	mitotic cell cycle process	0.66026	-0.415122	68	10	0.027248	3.20834e+50	dlg1,Arf79F,Syx1A,Rheb,san,E2f1,smt3,tacc,14-3-3epsilon,ctp
GO:0010631	epithelial cell migration	0.661441	-0.413335	48	7	0.0190736	4.37393e+34	awd,spoon,csw,RN-tre,Diap1,veli,Stat92E
GO:0090132	epithelium migration	0.661441	-0.413335	48	7	0.0190736	4.52784e+34	csw,RN-tre,Diap1,spoon,awd,Stat92E,veli
GO:0070887	cellular response to chemical stimulus	0.663459	-0.410289	134	20	0.0544959	4.21093e+100	Prx3,Sirup,Atg1,Hsc70-5,Pka-R2,csw,Chd64,Tom40,Eip93F,PyK,Rheb,Ilp2,Stat92E,Hydr2,smt3,Nurf-38,Ilp6,GLaz,Idh,Rab10
GO:0007291	sperm individualization	0.672804	-0.396301	21	3	0.00817439	462433435831405	poe,Npc1a,ctp
GO:0036293	response to decreased oxygen levels	0.672804	-0.396301	21	3	0.00817439	312284493644978	tko,Eip93F,Tom40
GO:0006898	receptor-mediated endocytosis	0.672804	-0.396301	21	3	0.00817439	388463507838993	lqf,Arr1,Arr2
GO:0002759	regulation of antimicrobial humoral response	0.672804	-0.396301	21	3	0.00817439	424284282133981	Stat92E,Pli,smt3
GO:0010632	regulation of epithelial cell migration	0.672804	-0.396301	21	3	0.00817439	397533874638059	Diap1,ple,Ptpmeg
GO:0072330	monocarboxylic acid biosynthetic process	0.672804	-0.396301	21	3	0.00817439	401554005633532	SREBP,CG3961,Hydr2
GO:0002920	regulation of humoral immune response	0.672804	-0.396301	21	3	0.00817439	339814282142428	smt3,Pli,Stat92E
GO:0042593	glucose homeostasis	0.672804	-0.396301	21	3	0.00817439	435824262039150	Tpi,PyK,Ilp2
GO:0007033	vacuole organization	0.672804	-0.396301	21	3	0.00817439	360403938339454	TER94,Atg12,Atg1
GO:0008039	synaptic target recognition	0.672804	-0.396301	21	3	0.00817439	460154046432400	tutl,Ten-m,NetB
GO:0050778	positive regulation of immune response	0.67306	-0.395921	28	4	0.0108992	4.02483e+19	Ide,smt3,Pli,Pp1alpha-96A
GO:0055085	transmembrane transport	0.674733	-0.393439	187	28	0.0762943	4.09313e+139	wtrw,MRP,sun,ATPsyndelta,ATPsynbeta,CG5687,ATPsynB,Vha16-1,ATPsynG,ClC-b,Sec63,SLC5A11,nAChRbeta2,ATPsynCF6,CG9657,CG11147,Vha44,CG8206,eag,Indy,ClC-a,CG6126,Tom20,Ca-alpha1D,Vha14-1,Tom40,Ih,ATPsyngamma
GO:0050829	defense response to Gram-negative bacterium	0.675631	-0.392107	35	5	0.013624	3.66644e+24	Cyp6a20,Ide,Listericin,CG16756,Pp1alpha-96A
GO:0031669	cellular response to nutrient levels	0.675631	-0.392107	35	5	0.013624	3.93833e+24	Atg12,Ilp6,GLaz,Bruce,Atg1
GO:0031668	cellular response to extracellular stimulus	0.675631	-0.392107	35	5	0.013624	3.93833e+24	Atg12,Ilp6,Bruce,Atg1,GLaz
GO:1904398	positive regulation of neuromuscular junction development	0.678239	-0.388256	14	2	0.00544959	11733232083	Rheb,dlg1
GO:0072347	response to anesthetic	0.678239	-0.388256	14	2	0.00544959	3604131957	Pka-R2,alpha-Man-Ia
GO:0048863	stem cell differentiation	0.678239	-0.388256	14	2	0.00544959	4136344205	pros,spen
GO:0051293	establishment of spindle localization	0.678239	-0.388256	14	2	0.00544959	3140532083	ctp,dlg1
GO:0010507	negative regulation of autophagy	0.678239	-0.388256	14	2	0.00544959	11733241260	Rheb,Bruce
GO:0030307	positive regulation of cell growth	0.678239	-0.388256	14	2	0.00544959	39150117332	Ilp2,Rheb
GO:0043405	regulation of MAP kinase activity	0.678239	-0.388256	14	2	0.00544959	4348133981	alph,smt3
GO:0045887	positive regulation of synaptic growth at neuromuscular junction	0.678239	-0.388256	14	2	0.00544959	32083117332	dlg1,Rheb
GO:0006904	vesicle docking involved in exocytosis	0.678239	-0.388256	14	2	0.00544959	4285433025	Syx1A,Rab10
GO:0051653	spindle localization	0.678239	-0.388256	14	2	0.00544959	3208331405	dlg1,ctp
GO:0097237	cellular response to toxic substance	0.678239	-0.388256	14	2	0.00544959	3604142109	Pka-R2,Prx3
GO:0032273	positive regulation of protein polymerization	0.678239	-0.388256	14	2	0.00544959	3334341392	chinmo,Jupiter
GO:0040018	positive regulation of multicellular organism growth	0.678239	-0.388256	14	2	0.00544959	3122039150	Ilp6,Ilp2
GO:0007034	vacuolar transport	0.678239	-0.388256	14	2	0.00544959	3601538529	Vamp7,CG15012
GO:0070050	neuron cellular homeostasis	0.678239	-0.388256	14	2	0.00544959	3690540459	Cbp53E,Csp
GO:0007143	female meiotic nuclear division	0.678239	-0.388256	14	2	0.00544959	3235340589	mamo,tacc
GO:0045570	regulation of imaginal disc growth	0.678239	-0.388256	14	2	0.00544959	3208341398	dlg1,Csk
GO:0032507	maintenance of protein location in cell	0.678239	-0.388256	14	2	0.00544959	4051735215	alpha-Cat,Pax
GO:0051480	regulation of cytosolic calcium ion concentration	0.678239	-0.388256	14	2	0.00544959	4354136905	Capa,Cbp53E
GO:0198738	cell-cell signaling by wnt	0.678239	-0.388256	14	2	0.00544959	4292244289	Pp1alpha-96A,flw
GO:0072384	organelle transport along microtubule	0.678239	-0.388256	14	2	0.00544959	3158131607	Marf,Pink1
GO:0015698	inorganic anion transport	0.678239	-0.388256	14	2	0.00544959	3638141428	ClC-b,ClC-a
GO:0090130	tissue migration	0.683506	-0.380519	49	7	0.0190736	4.24284e+34	Stat92E,veli,Diap1,csw,RN-tre,spoon,awd
GO:0044255	cellular lipid metabolic process	0.685118	-0.378164	96	14	0.0381471	3.29093e+69	CG7990,Hydr2,CG14945,santa-maria,Ipp,CG3961,bmm,rdgB,mdy,pdgy,SREBP,Pdh,CG2201,mino
GO:0048870	cell motility	0.685118	-0.378164	96	14	0.0381471	4.30034e+69	veli,Rac2,Csk,RN-tre,Diap1,14-3-3epsilon,Stat92E,gus,sn,awd,spoon,csw,NetB,inaC
GO:0023061	signal release	0.687996	-0.373972	56	8	0.0217984	3.88464e+39	lqf,gammaSnap1,Arf79F,Scamp,Syx1A,Csp,Syngr,veli
GO:0001667	ameboidal-type cell migration	0.687996	-0.373972	56	8	0.0217984	3.97534e+39	Diap1,RN-tre,veli,Rac2,awd,spoon,csw,Stat92E
GO:0070647	protein modification by small protein conjugation or removal	0.690141	-0.370859	83	12	0.0326975	4.28214e+59	Pli,Diap1,Fbxl4,CG11658,RpS27A,Den1,Bruce,hyd,smt3,godzilla,Ubc4,poe
GO:0006886	intracellular protein transport	0.696249	-0.362048	110	16	0.0435967	3.30254e+83	Rab10,RN-tre,CG8206,Syx1A,Sec63,mge,CG34132,Karybeta3,Rab18,Dbp80,Arf79F,Tim9a,UQCR-C2,Tom40,gammaSnap1,Tom20
GO:0006812	cation transport	0.696249	-0.362048	110	16	0.0435967	4.40463e+79	sun,ATPsyndelta,wtrw,ATPsynbeta,ATPsynG,Vha16-1,ATPsynB,Vha44,ATPsynCF6,Ca-alpha1D,Capa,eag,Indy,Vha14-1,Ih,ATPsyngamma
GO:0032990	cell part morphogenesis	0.699882	-0.356843	163	24	0.0653951	3.18841e+122	Bsg,CG6701,jim,Rac2,pros,futsch,fax,spen,14-3-3epsilon,Hsc70-5,NetB,Mitofilin,Pka-R2,Marf,ct,Ptpmeg,Ten-m,dock,FER,cnc,sn,smt3,tutl,TER94
GO:0043901	negative regulation of multi-organism process	0.700784	-0.355556	29	4	0.0108992	3.80594e+19	Ptpmeg,Stat92E,Pli,Bruce
GO:0007017	microtubule-based process	0.701552	-0.35446	117	17	0.0463215	4.27433e+86	cnc,smt3,TER94,BicD,Pink1,Ten-m,Tbce,dlg1,ctp,14-3-3epsilon,Atg1,Marf,tacc,awd,cpa,futsch,Map205
GO:0004842	ubiquitin-protein transferase activity	0.702126	-0.353642	43	6	0.0163488	3.23784e+29	Fbxl4,CG11658,Pli,Diap1,Ubc4,poe
GO:0032956	regulation of actin cytoskeleton organization	0.702126	-0.353642	43	6	0.0163488	3.85343e+31	Cip4,spoon,flw,chinmo,conu,cpa
GO:0042335	cuticle development	0.702126	-0.353642	43	6	0.0163488	3.18636e+29	t,Cpr65Au,ple,sn,Cpr67B,gus
GO:0045471	response to ethanol	0.702126	-0.353642	43	6	0.0163488	3.20834e+31	dlg1,CG17734,inaC,Pka-R2,Adh,homer
GO:0046907	intracellular transport	0.703081	-0.352284	196	29	0.0790191	3.84184e+150	kst,Rab18,Karybeta3,godzilla,ATPsynbeta,Dbp80,Sec63,Syx1A,BicD,mge,CG34132,CG8206,RN-tre,Rab10,Vamp7,Pink1,Atg1,Tom20,gammaSnap1,flw,tacc,Marf,Tim9a,chinmo,Tom40,UQCR-C2,CG15012,Arf79F,futsch
GO:0008020	G protein-coupled photoreceptor activity	0.703155	-0.352178	7	1	0.0027248	42305	cry
GO:0006835	dicarboxylic acid transport	0.703155	-0.352178	7	1	0.0027248	40049	Indy
GO:2001023	regulation of response to drug	0.703155	-0.352178	7	1	0.0027248	36589	Ih
GO:0010977	negative regulation of neuron projection development	0.703155	-0.352178	7	1	0.0027248	41363	pros
GO:0090303	positive regulation of wound healing	0.703155	-0.352178	7	1	0.0027248	38831	Rac2
GO:0048790	maintenance of presynaptic active zone structure	0.703155	-0.352178	7	1	0.0027248	40464	Ten-m
GO:0008543	fibroblast growth factor receptor signaling pathway	0.703155	-0.352178	7	1	0.0027248	45278	csw
GO:0045751	negative regulation of Toll signaling pathway	0.703155	-0.352178	7	1	0.0027248	42821	Pli
GO:0009247	glycolipid biosynthetic process	0.703155	-0.352178	7	1	0.0027248	32909	CG7990
GO:0046854	phosphatidylinositol phosphorylation	0.703155	-0.352178	7	1	0.0027248	41701	Ipp
GO:0044550	secondary metabolite biosynthetic process	0.703155	-0.352178	7	1	0.0027248	39392	Est-6
GO:0006367	transcription initiation from RNA polymerase II promoter	0.703155	-0.352178	7	1	0.0027248	42822	TfIIA-S
GO:0097190	apoptotic signaling pathway	0.703155	-0.352178	7	1	0.0027248	33271	ninaA
GO:0031122	cytoplasmic microtubule organization	0.703155	-0.352178	7	1	0.0027248	40464	Ten-m
GO:0072375	medium-term memory	0.703155	-0.352178	7	1	0.0027248	31607	Pink1
GO:0006030	chitin metabolic process	0.703155	-0.352178	7	1	0.0027248	34979	Idgf2
GO:0016301	kinase activity	0.703155	-0.352178	7	1	0.0027248	43739	awd
GO:0009156	ribonucleoside monophosphate biosynthetic process	0.703155	-0.352178	7	1	0.0027248	42973	CG11089
GO:0055092	sterol homeostasis	0.703155	-0.352178	7	1	0.0027248	117332	Rheb
GO:0009648	photoperiodism	0.703155	-0.352178	7	1	0.0027248	42305	cry
GO:0009124	nucleoside monophosphate biosynthetic process	0.703155	-0.352178	7	1	0.0027248	42973	CG11089
GO:0034644	cellular response to UV	0.703155	-0.352178	7	1	0.0027248	50227	CG17059
GO:0031109	microtubule polymerization or depolymerization	0.703155	-0.352178	7	1	0.0027248	35532	Tbce
GO:0006576	cellular biogenic amine metabolic process	0.703155	-0.352178	7	1	0.0027248	31863	t
GO:0044344	cellular response to fibroblast growth factor stimulus	0.703155	-0.352178	7	1	0.0027248	45278	csw
GO:0071361	cellular response to ethanol	0.703155	-0.352178	7	1	0.0027248	36041	Pka-R2
GO:0043279	response to alkaloid	0.703155	-0.352178	7	1	0.0027248	36041	Pka-R2
GO:0009308	amine metabolic process	0.703155	-0.352178	7	1	0.0027248	31863	t
GO:0060259	regulation of feeding behavior	0.703155	-0.352178	7	1	0.0027248	39150	Ilp2
GO:0042220	response to cocaine	0.703155	-0.352178	7	1	0.0027248	36041	Pka-R2
GO:1990748	cellular detoxification	0.703155	-0.352178	7	1	0.0027248	42109	Prx3
GO:0009187	cyclic nucleotide metabolic process	0.703155	-0.352178	7	1	0.0027248	35107	Pde11
GO:0071774	response to fibroblast growth factor	0.703155	-0.352178	7	1	0.0027248	45278	csw
GO:0030490	maturation of SSU-rRNA	0.703155	-0.352178	7	1	0.0027248	43532	RpS8
GO:0006664	glycolipid metabolic process	0.703155	-0.352178	7	1	0.0027248	32909	CG7990
GO:0090328	regulation of olfactory learning	0.703155	-0.352178	7	1	0.0027248	34364	me31B
GO:0034404	nucleobase-containing small molecule biosynthetic process	0.703155	-0.352178	7	1	0.0027248	43739	awd
GO:0070868	heterochromatin organization involved in chromatin silencing	0.703155	-0.352178	7	1	0.0027248	31442	snf
GO:0007093	mitotic cell cycle checkpoint	0.703155	-0.352178	7	1	0.0027248	42186	14-3-3epsilon
GO:0003015	heart process	0.703155	-0.352178	7	1	0.0027248	32314	up
GO:0099558	maintenance of synapse structure	0.703155	-0.352178	7	1	0.0027248	40464	Ten-m
GO:0006487	protein N-linked glycosylation	0.703155	-0.352178	7	1	0.0027248	3354921	Gfat1
GO:0098869	cellular oxidant detoxification	0.703155	-0.352178	7	1	0.0027248	42109	Prx3
GO:0045448	mitotic cell cycle, embryonic	0.703155	-0.352178	7	1	0.0027248	33981	smt3
GO:0008347	glial cell migration	0.703155	-0.352178	7	1	0.0027248	32400	NetB
GO:0048678	response to axon injury	0.703155	-0.352178	7	1	0.0027248	40627	rtp
GO:0043903	regulation of symbiosis, encompassing mutualism through parasitism	0.703155	-0.352178	7	1	0.0027248	36040	TER94
GO:0003013	circulatory system process	0.703155	-0.352178	7	1	0.0027248	32314	up
GO:0009069	serine family amino acid metabolic process	0.703155	-0.352178	7	1	0.0027248	39988	CG7430
GO:0042745	circadian sleep/wake cycle	0.703155	-0.352178	7	1	0.0027248	36589	Ih
GO:0009084	glutamine family amino acid biosynthetic process	0.703155	-0.352178	7	1	0.0027248	36782	Got1
GO:0044106	cellular amine metabolic process	0.703155	-0.352178	7	1	0.0027248	31863	t
GO:0071236	cellular response to antibiotic	0.703155	-0.352178	7	1	0.0027248	36041	Pka-R2
GO:1903509	liposaccharide metabolic process	0.703155	-0.352178	7	1	0.0027248	32909	CG7990
GO:0055123	digestive system development	0.704359	-0.350467	22	3	0.00817439	445404242842743	ct,Stat92E,cnc
GO:0034250	positive regulation of cellular amide metabolic process	0.704359	-0.350467	22	3	0.00817439	3791411733239100	CG4612,Rheb,RpS9
GO:0031349	positive regulation of defense response	0.704359	-0.350467	22	3	0.00817439	429224024836183	Pp1alpha-96A,Ide,Listericin
GO:0030856	regulation of epithelial cell differentiation	0.704359	-0.350467	22	3	0.00817439	380593975332083	Ptpmeg,Diap1,dlg1
GO:0048565	digestive tract development	0.704359	-0.350467	22	3	0.00817439	427434242844540	cnc,Stat92E,ct
GO:0031330	negative regulation of cellular catabolic process	0.704359	-0.350467	22	3	0.00817439	3915041260117330	Ilp2,Bruce,Rheb
GO:0030951	establishment or maintenance of microtubule cytoskeleton polarity	0.704359	-0.350467	22	3	0.00817439	421863505142743	14-3-3epsilon,BicD,cnc
GO:0061025	membrane fusion	0.704359	-0.350467	22	3	0.00817439	428543604036015	Syx1A,TER94,Vamp7
GO:0007309	oocyte axis specification	0.704642	-0.350065	50	7	0.0190736	4.42893e+34	flw,dlg1,sel,BicD,cnc,gus,14-3-3epsilon
GO:0045089	positive regulation of innate immune response	0.715589	-0.334649	15	2	0.00544959	4292240248	Pp1alpha-96A,Ide
GO:0002760	positive regulation of antimicrobial humoral response	0.715589	-0.334649	15	2	0.00544959	3398142821	smt3,Pli
GO:0002922	positive regulation of humoral immune response	0.715589	-0.334649	15	2	0.00544959	3398142821	smt3,Pli
GO:0002702	positive regulation of production of molecular mediator of immune response	0.715589	-0.334649	15	2	0.00544959	3398142821	smt3,Pli
GO:0051651	maintenance of location in cell	0.715589	-0.334649	15	2	0.00544959	3521540517	Pax,alpha-Cat
GO:0048278	vesicle docking	0.715589	-0.334649	15	2	0.00544959	4285433025	Syx1A,Rab10
GO:0007419	ventral cord development	0.715589	-0.334649	15	2	0.00544959	4136342550	pros,E2f1
GO:0033206	meiotic cytokinesis	0.715589	-0.334649	15	2	0.00544959	4050641181	Arf79F,hyd
GO:0032506	cytokinetic process	0.715589	-0.334649	15	2	0.00544959	4428940506	flw,Arf79F
GO:0007188	adenylate cyclase-modulating G protein-coupled receptor signaling pathway	0.715589	-0.334649	15	2	0.00544959	34181246420	Dh31,CG30054
GO:0032482	Rab protein signal transduction	0.715589	-0.334649	15	2	0.00544959	3302544360	Rab10,Rab18
GO:0045786	negative regulation of cell cycle	0.715589	-0.334649	15	2	0.00544959	4218636040	14-3-3epsilon,TER94
GO:0002699	positive regulation of immune effector process	0.715589	-0.334649	15	2	0.00544959	4282133981	Pli,smt3
GO:0002225	positive regulation of antimicrobial peptide production	0.715589	-0.334649	15	2	0.00544959	4282133981	Pli,smt3
GO:0051674	localization of cell	0.715659	-0.334552	98	14	0.0381471	3.88314e+69	Rac2,Csk,veli,Diap1,RN-tre,gus,sn,14-3-3epsilon,Stat92E,NetB,inaC,awd,csw,spoon
GO:0044092	negative regulation of molecular function	0.723843	-0.323181	44	6	0.0163488	4.34814e+31	alph,Diap1,conu,Arr2,14-3-3epsilon,Arr1
GO:0010638	positive regulation of organelle organization	0.724185	-0.322708	37	5	0.013624	4.24283e+24	Stat92E,chinmo,Pink1,Marf,Jupiter
GO:0048024	regulation of mRNA splicing, via spliceosome	0.726779	-0.319133	30	4	0.0108992	4.28487e+21	Rox8,CG17454,snf,mbl
GO:0001558	regulation of cell growth	0.726779	-0.319133	30	4	0.0108992	3.91501e+20	Ilp2,Rheb,Atg1,CG9328
GO:0016054	organic acid catabolic process	0.726779	-0.319133	30	4	0.0108992	3.99883e+21	CG7430,Hydr2,TER94,CG17691
GO:0015931	nucleobase-containing compound transport	0.726779	-0.319133	30	4	0.0108992	3.35492e+21	Dbp80,Tom20,Vha16-1,BicD
GO:0008344	adult locomotory behavior	0.726779	-0.319133	30	4	0.0108992	4.60153e+19	tutl,Galt,ple,Marf
GO:0010564	regulation of cell cycle process	0.726779	-0.319133	30	4	0.0108992	4.21864e+19	14-3-3epsilon,Bruce,E2f1,flw
GO:0034329	cell junction assembly	0.726779	-0.319133	30	4	0.0108992	3.20834e+19	dlg1,alpha-Cat,kst,CG44325
GO:0046395	carboxylic acid catabolic process	0.726779	-0.319133	30	4	0.0108992	3.99883e+21	CG7430,Hydr2,CG17691,TER94
GO:0042326	negative regulation of phosphorylation	0.726779	-0.319133	30	4	0.0108992	4.34814e+19	alph,flw,cpa,chinmo
GO:0001933	negative regulation of protein phosphorylation	0.726779	-0.319133	30	4	0.0108992	3.33434e+19	chinmo,cpa,flw,alph
GO:0050767	regulation of neurogenesis	0.730228	-0.314398	99	14	0.0381471	3.43643e+70	me31B,ctp,COX5A,tutl,csw,UQCR-14,CG5214,alph,NetB,Rheb,pros,Rac2,CG7834,Arf79F
GO:0046620	regulation of organ growth	0.73354	-0.309874	23	3	0.00817439	320834139839150	dlg1,Csk,Ilp2
GO:0007315	pole plasm assembly	0.73354	-0.309874	23	3	0.00817439	320834274335478	dlg1,cnc,gus
GO:0009895	negative regulation of catabolic process	0.73354	-0.309874	23	3	0.00817439	4126039150117330	Bruce,Ilp2,Rheb
GO:0008544	epidermis development	0.73354	-0.309874	23	3	0.00817439	317174420538534	sn,spen,Cip4
GO:0006909	phagocytosis	0.73354	-0.309874	23	3	0.00817439	452783321938831	csw,crq,Rac2
GO:0043297	apical junction assembly	0.73354	-0.309874	23	3	0.00817439	320833183138418	dlg1,CG44325,kst
GO:0008593	regulation of Notch signaling pathway	0.73354	-0.309874	23	3	0.00817439	435013884632083	Kul,lqf,dlg1
GO:0048477	oogenesis	0.735194	-0.307621	199	29	0.0790191	4.45404e+144	ct,BicD,E2f1,Rab10,Cip4,dlg1,Diap1,RN-tre,kst,Stat92E,me31B,cnc,sel,smt3,mdy,veli,cpa,Rac2,Csk,snf,Bruce,Atg1,14-3-3epsilon,Pax,gus,ctp,flw,spoon,csw
GO:0006468	protein phosphorylation	0.737796	-0.304087	86	12	0.0326975	3.16074e+59	Pink1,Rac2,Csk,CG31145,bt,Ptpmeg,inaC,awd,Dyrk2,Atg1,FER,Pkc53E
GO:0098655	cation transmembrane transport	0.737796	-0.304087	86	12	0.0326975	3.24284e+59	eag,sun,ATPsyndelta,Ca-alpha1D,ATPsynbeta,Vha14-1,Vha16-1,ATPsynB,ATPsynG,ATPsynCF6,Vha44,ATPsyngamma
GO:0007268	chemical synaptic transmission	0.73795	-0.303879	113	16	0.0435967	3.65334e+79	Syngr,veli,Arf79F,cpo,gammaSnap1,Ipp,lqf,Syx1A,Csp,Scamp,Ten-m,Tbce,dlg1,nAChRbeta2,Pink1,Pgk
GO:0098916	anterograde trans-synaptic signaling	0.73795	-0.303879	113	16	0.0435967	4.04644e+79	Ten-m,Tbce,dlg1,nAChRbeta2,Pink1,Syx1A,Csp,Scamp,Pgk,Arf79F,veli,Syngr,lqf,gammaSnap1,Ipp,cpo
GO:0046903	secretion	0.741023	-0.299723	93	13	0.0354223	4.30034e+64	veli,Syx1A,Csp,Syngr,Scamp,Rab10,Vamp7,Arf79F,MRP,Tango9,gammaSnap1,Dh31,lqf
GO:0032970	regulation of actin filament-based process	0.744435	-0.29513	45	6	0.0163488	3.33434e+31	chinmo,cpa,conu,flw,Cip4,spoon
GO:0006508	proteolysis	0.745908	-0.293153	167	24	0.0653951	3.16074e+121	Pink1,Diap1,Ide,CG31200,CG9649,CG31326,CG6067,TER94,godzilla,CG11658,Ance-5,UQCR-C2,CG31199,CG9372,CG31205,CG17337,poe,Fbxl4,CG11842,Kul,gus,RpS27A,Den1,Bruce
GO:0045892	negative regulation of transcription, DNA-templated	0.746087	-0.292914	66	9	0.0245232	4.45404e+44	ct,pros,SREBP,E2f1,snf,dlg1,cry,tth,spt4
GO:0005977	glycogen metabolic process	0.749234	-0.288704	16	2	0.00544959	3945439383	Atg1,Atg12
GO:0046928	regulation of neurotransmitter secretion	0.749234	-0.288704	16	2	0.00544959	3505136589	BicD,Ih
GO:0051965	positive regulation of synapse assembly	0.749234	-0.288704	16	2	0.00544959	32083117332	dlg1,Rheb
GO:0140056	organelle localization by membrane tethering	0.749234	-0.288704	16	2	0.00544959	3302542854	Rab10,Syx1A
GO:0051588	regulation of neurotransmitter transport	0.749234	-0.288704	16	2	0.00544959	3658935051	Ih,BicD
GO:0007187	G protein-coupled receptor signaling pathway, coupled to cyclic nucleotide second messenger	0.749234	-0.288704	16	2	0.00544959	34181246420	Dh31,CG30054
GO:0044042	glucan metabolic process	0.749234	-0.288704	16	2	0.00544959	3938339454	Atg12,Atg1
GO:1901607	alpha-amino acid biosynthetic process	0.749234	-0.288704	16	2	0.00544959	32618936782	Adi1,Got1
GO:0006112	energy reserve metabolic process	0.749234	-0.288704	16	2	0.00544959	3938339454	Atg12,Atg1
GO:0035330	regulation of hippo signaling	0.749234	-0.288704	16	2	0.00544959	4218641398	14-3-3epsilon,Csk
GO:0030155	regulation of cell adhesion	0.749234	-0.288704	16	2	0.00544959	4046432083	Ten-m,dlg1
GO:0045787	positive regulation of cell cycle	0.749234	-0.288704	16	2	0.00544959	4143242550	COX5A,E2f1
GO:0010001	glial cell differentiation	0.749234	-0.288704	16	2	0.00544959	4420541363	spen,pros
GO:0120031	plasma membrane bounded cell projection assembly	0.749234	-0.288704	16	2	0.00544959	3171738831	sn,Rac2
GO:0022406	membrane docking	0.749234	-0.288704	16	2	0.00544959	3302542854	Rab10,Syx1A
GO:0016476	regulation of embryonic cell shape	0.749234	-0.288704	16	2	0.00544959	3883141118	Rac2,FER
GO:0006073	cellular glucan metabolic process	0.749234	-0.288704	16	2	0.00544959	3938339454	Atg12,Atg1
GO:0032784	regulation of DNA-templated transcription, elongation	0.750521	-0.286987	8	1	0.0027248	36387	spt4
GO:0006893	Golgi to plasma membrane transport	0.750521	-0.286987	8	1	0.0027248	40506	Arf79F
GO:0006405	RNA export from nucleus	0.750521	-0.286987	8	1	0.0027248	3354919	Dbp80
GO:0008594	photoreceptor cell morphogenesis	0.750521	-0.286987	8	1	0.0027248	318841	Bsg
GO:0046425	regulation of receptor signaling pathway via JAK-STAT	0.750521	-0.286987	8	1	0.0027248	32083	dlg1
GO:0008293	torso signaling pathway	0.750521	-0.286987	8	1	0.0027248	45278	csw
GO:0045047	protein targeting to ER	0.750521	-0.286987	8	1	0.0027248	38819	Sec63
GO:0009112	nucleobase metabolic process	0.750521	-0.286987	8	1	0.0027248	39396	Adk1
GO:0046434	organophosphate catabolic process	0.750521	-0.286987	8	1	0.0027248	41701	Ipp
GO:0035073	pupariation	0.750521	-0.286987	8	1	0.0027248	33981	smt3
GO:0007040	lysosome organization	0.750521	-0.286987	8	1	0.0027248	36040	TER94
GO:0007041	lysosomal transport	0.750521	-0.286987	8	1	0.0027248	36015	Vamp7
GO:0050909	sensory perception of taste	0.750521	-0.286987	8	1	0.0027248	41363	pros
GO:1904892	regulation of receptor signaling pathway via STAT	0.750521	-0.286987	8	1	0.0027248	32083	dlg1
GO:0003712	transcription coregulator activity	0.750521	-0.286987	8	1	0.0027248	35215	Pax
GO:1905954	positive regulation of lipid localization	0.750521	-0.286987	8	1	0.0027248	39611	bmm
GO:0007426	tracheal outgrowth, open tracheal system	0.750521	-0.286987	8	1	0.0027248	38831	Rac2
GO:0007271	synaptic transmission, cholinergic	0.750521	-0.286987	8	1	0.0027248	42920	nAChRbeta2
GO:0007390	germ-band shortening	0.750521	-0.286987	8	1	0.0027248	38831	Rac2
GO:0045500	sevenless signaling pathway	0.750521	-0.286987	8	1	0.0027248	45278	csw
GO:0061057	peptidoglycan recognition protein signaling pathway	0.750521	-0.286987	8	1	0.0027248	36183	Listericin
GO:0046959	habituation	0.750521	-0.286987	8	1	0.0027248	34364	me31B
GO:1903829	positive regulation of cellular protein localization	0.750521	-0.286987	8	1	0.0027248	33981	smt3
GO:0010160	formation of animal organ boundary	0.750521	-0.286987	8	1	0.0027248	32400	NetB
GO:0032786	positive regulation of DNA-templated transcription, elongation	0.750521	-0.286987	8	1	0.0027248	36387	spt4
GO:0051924	regulation of calcium ion transport	0.750521	-0.286987	8	1	0.0027248	33944	homer
GO:0000075	cell cycle checkpoint	0.750521	-0.286987	8	1	0.0027248	42186	14-3-3epsilon
GO:0000288	nuclear-transcribed mRNA catabolic process, deadenylation-dependent decay	0.750521	-0.286987	8	1	0.0027248	41339	cu
GO:0030536	larval feeding behavior	0.750521	-0.286987	8	1	0.0027248	39150	Ilp2
GO:0060359	response to ammonium ion	0.750521	-0.286987	8	1	0.0027248	36041	Pka-R2
GO:0055072	iron ion homeostasis	0.750521	-0.286987	8	1	0.0027248	41407	Ho
GO:0043624	cellular protein complex disassembly	0.750521	-0.286987	8	1	0.0027248	40240	eRF1
GO:0072599	establishment of protein localization to endoplasmic reticulum	0.750521	-0.286987	8	1	0.0027248	38819	Sec63
GO:0080171	lytic vacuole organization	0.750521	-0.286987	8	1	0.0027248	36040	TER94
GO:0035210	prepupal development	0.750521	-0.286987	8	1	0.0027248	33981	smt3
GO:0016791	phosphatase activity	0.750521	-0.286987	8	1	0.0027248	32967	CG12237
GO:0006536	glutamate metabolic process	0.750521	-0.286987	8	1	0.0027248	36782	Got1
GO:0006606	protein import into nucleus	0.750521	-0.286987	8	1	0.0027248	40581	Karybeta3
GO:0099536	synaptic signaling	0.751013	-0.286333	114	16	0.0435967	3.88465e+79	lqf,cpo,gammaSnap1,Ipp,Arf79F,Syngr,veli,Pgk,nAChRbeta2,Pink1,Ten-m,Tbce,dlg1,Scamp,Csp,Syx1A
GO:0099537	trans-synaptic signaling	0.751013	-0.286333	114	16	0.0435967	3.88464e+79	lqf,gammaSnap1,Ipp,cpo,Arf79F,Syngr,veli,Pgk,Pink1,nAChRbeta2,dlg1,Tbce,Ten-m,Scamp,Syx1A,Csp
GO:0007447	imaginal disc pattern formation	0.751058	-0.286273	31	4	0.0108992	3.78424e+19	gammaSnap1,14-3-3epsilon,spen,CG1943
GO:0008045	motor neuron axon guidance	0.760406	-0.273903	24	3	0.00817439	388313240040464	Rac2,NetB,Ten-m
GO:0018958	phenol-containing compound metabolic process	0.760406	-0.273903	24	3	0.00817439	388313186338746	Rac2,t,ple
GO:0099003	vesicle-mediated transport in synapse	0.761953	-0.27187	60	8	0.0217984	3.24704e+39	Scamp,BicD,Csp,Syx1A,Syngr,Arf79F,gammaSnap1,lqf
GO:0099504	synaptic vesicle cycle	0.761953	-0.27187	60	8	0.0217984	3.88464e+39	lqf,gammaSnap1,Arf79F,Scamp,BicD,Csp,Syngr,Syx1A
GO:0050776	regulation of immune response	0.762323	-0.271386	53	7	0.0190736	4.24284e+34	Stat92E,Pli,Rac2,Pp1alpha-96A,Ide,smt3,crq
GO:0007308	oocyte construction	0.762323	-0.271386	53	7	0.0190736	4.21864e+34	14-3-3epsilon,cnc,BicD,gus,flw,sel,dlg1
GO:0002831	regulation of response to biotic stimulus	0.762323	-0.271386	53	7	0.0190736	3.43644e+34	me31B,Pli,Stat92E,Pp1alpha-96A,Ide,smt3,Listericin
GO:0007626	locomotory behavior	0.76497	-0.267919	81	11	0.0299728	3.91504e+54	Ilp2,Ih,dlg1,ple,cu,cry,Pka-R2,Marf,Galt,tutl,qsm
GO:0016049	cell growth	0.767316	-0.264857	39	5	0.013624	4.11184e+24	FER,Ptpmeg,eag,Rac2,poe
GO:0071496	cellular response to external stimulus	0.767316	-0.264857	39	5	0.013624	3.12204e+24	Ilp6,Atg1,Bruce,GLaz,Atg12
GO:0031032	actomyosin structure organization	0.767316	-0.264857	39	5	0.013624	3.90023e+25	Prm,up,Bsg,bt,Mlp60A
GO:0022603	regulation of anatomical structure morphogenesis	0.771041	-0.260014	102	14	0.0381471	4.60155e+70	tutl,csw,Marf,alph,NetB,FER,me31B,Pax,Mp20,Diap1,Pink1,Rheb,pros,Rac2
GO:0000278	mitotic cell cycle	0.771041	-0.260014	102	14	0.0381471	4.25504e+70	E2f1,san,Syx1A,Rheb,Arf79F,Map205,dlg1,ctp,14-3-3epsilon,tacc,alph,csw,smt3,awd
GO:0045936	negative regulation of phosphate metabolic process	0.773651	-0.256635	32	4	0.0108992	3.73873e+19	cpa,chinmo,alph,flw
GO:0002684	positive regulation of immune system process	0.773651	-0.256635	32	4	0.0108992	4.28214e+19	Pli,Pp1alpha-96A,Ide,smt3
GO:0051235	maintenance of location	0.773651	-0.256635	32	4	0.0108992	4.05174e+19	alpha-Cat,Pax,14-3-3epsilon,Cpn
GO:0010563	negative regulation of phosphorus metabolic process	0.773651	-0.256635	32	4	0.0108992	3.73873e+19	cpa,chinmo,alph,flw
GO:0010033	response to organic substance	0.777405	-0.251794	170	24	0.0653951	3.30253e+122	Rab10,dlg1,homer,Ilp6,Nurf-38,SREBP,inaC,godzilla,smt3,Hydr2,Stat92E,PyK,Adh,Rheb,Ilp2,CG17734,Pka-R2,Hsc70-5,alph,Chd64,csw,eag,rtp,PHGPx
GO:0009798	axis specification	0.778004	-0.251024	68	9	0.0245232	4.21864e+44	14-3-3epsilon,gus,cnc,flw,csw,sel,spoon,BicD,dlg1
GO:1903507	negative regulation of nucleic acid-templated transcription	0.778004	-0.251024	68	9	0.0245232	3.23184e+44	tth,spt4,cry,pros,SREBP,E2f1,ct,snf,dlg1
GO:1902679	negative regulation of RNA biosynthetic process	0.778004	-0.251024	68	9	0.0245232	4.25504e+44	E2f1,SREBP,pros,ct,snf,dlg1,tth,spt4,cry
GO:0007186	G protein-coupled receptor signaling pathway	0.778345	-0.250585	61	8	0.0217984	4.35413e+40	Capa,rdgB,Arr2,Gbeta76C,Dh31,CG30054,inaC,homer
GO:0008258	head involution	0.779405	-0.249225	17	2	0.00544959	3883139284	Rac2,chrb
GO:1903684	regulation of border follicle cell migration	0.779405	-0.249225	17	2	0.00544959	3975338059	Diap1,Ptpmeg
GO:0007156	homophilic cell adhesion via plasma membrane adhesion molecules	0.779405	-0.249225	17	2	0.00544959	31884146015	Bsg,tutl
GO:1903827	regulation of cellular protein localization	0.779405	-0.249225	17	2	0.00544959	3398141363	smt3,pros
GO:1901606	alpha-amino acid catabolic process	0.779405	-0.249225	17	2	0.00544959	3998836040	CG7430,TER94
GO:0006906	vesicle fusion	0.779405	-0.249225	17	2	0.00544959	4285436015	Syx1A,Vamp7
GO:1902905	positive regulation of supramolecular fiber organization	0.779405	-0.249225	17	2	0.00544959	4139233343	Jupiter,chinmo
GO:0120193	tight junction organization	0.779405	-0.249225	17	2	0.00544959	3208331831	dlg1,CG44325
GO:0048568	embryonic organ development	0.779405	-0.249225	17	2	0.00544959	3883131717	Rac2,sn
GO:0048546	digestive tract morphogenesis	0.779405	-0.249225	17	2	0.00544959	4242844540	Stat92E,ct
GO:0019991	septate junction assembly	0.779405	-0.249225	17	2	0.00544959	3208331831	dlg1,CG44325
GO:0120192	tight junction assembly	0.779405	-0.249225	17	2	0.00544959	3208331831	dlg1,CG44325
GO:0042594	response to starvation	0.77963	-0.248936	54	7	0.0190736	3.93834e+35	Atg12,GLaz,Atg1,Bruce,Rheb,Ilp2,Ilp6
GO:0071310	cellular response to organic substance	0.78193	-0.24599	96	13	0.0354223	3.91501e+65	Ilp2,Rheb,PyK,Nurf-38,Ilp6,Rab10,Hydr2,Stat92E,smt3,csw,Chd64,Hsc70-5,Pka-R2
GO:0042461	photoreceptor cell development	0.78226	-0.245569	47	6	0.0163488	4.14743e+30	Cpn,Bsg,Ten-m,tutl,csw,mbl
[truncated: 3,642 more rows]

## Sheet: 4b
4b. Enriched biological processes for genes that are circadian in young heads (Kuintzle et al., 2017 [GSE81100]), and downregulated in nCLK-𝚫1 compared to control flies on DR at ZT 0 or ZT 12.
TermID	Term	Enrichment	logP	Genes in Term	Target Genes in Term	Fraction of Targets in Term	Entrez Gene IDs	Gene Symbols
GO:0009416	response to light stimulus	3.01251e-06	-12.7127	78	14	0.141414	4.13394e+71	cu,rtp,laza,Arr2,Ekar,tim,Tsp42Ej,trp,inaF-B,inaD,ninaA,trpl,Gbeta76C,ninaC
GO:0009314	response to radiation	6.50934e-06	-11.9423	83	14	0.141414	4.06274e+71	rtp,cu,Arr2,Ekar,laza,tim,ninaA,inaD,trp,inaF-B,Tsp42Ej,trpl,Gbeta76C,ninaC
GO:0009642	response to light intensity	1.44731e-05	-11.1432	9	5	0.0505051	4.38064e+24	Ekar,Arr2,laza,ninaC,Tsp42Ej
GO:0071482	cellular response to light stimulus	1.76287e-05	-10.946	29	8	0.0808081	3.76294e+39	inaD,trp,Tsp42Ej,tim,Ekar,Arr2,ninaC,Gbeta76C
GO:0022400	regulation of rhodopsin mediated signaling pathway	1.96384e-05	-10.838	15	6	0.0606061	3.50783e+29	Arr1,Fbxl4,inaD,ninaC,Gbeta76C,Arr2
GO:0016059	deactivation of rhodopsin mediated signaling	1.96384e-05	-10.838	15	6	0.0606061	3.76293e+29	inaD,ninaC,Fbxl4,Arr1,Gbeta76C,Arr2
GO:0007602	phototransduction	3.09867e-05	-10.382	40	9	0.0909091	3.60034e+44	trpl,Gbeta76C,ninaC,rtp,Arr2,laza,inaD,ninaA,trp
GO:0009583	detection of light stimulus	3.8303e-05	-10.17	41	9	0.0909091	4.35424e+44	trp,inaD,ninaA,laza,Arr2,rtp,ninaC,Gbeta76C,trpl
GO:0071478	cellular response to radiation	3.88089e-05	-10.1569	32	8	0.0808081	3.35714e+39	tim,inaD,trp,Tsp42Ej,Ekar,Arr2,Gbeta76C,ninaC
GO:0009582	detection of abiotic stimulus	5.73862e-05	-9.76571	43	9	0.0909091	4.06274e+44	rtp,laza,Arr2,trp,ninaA,inaD,trpl,Gbeta76C,ninaC
GO:0009581	detection of external stimulus	5.73862e-05	-9.76571	43	9	0.0909091	4.35423e+44	trp,ninaA,inaD,laza,Arr2,rtp,ninaC,Gbeta76C,trpl
GO:0051606	detection of stimulus	8.39375e-05	-9.38544	45	9	0.0909091	3.60034e+44	trpl,Gbeta76C,ninaC,rtp,Arr2,laza,ninaA,inaD,trp
GO:0008277	regulation of G protein-coupled receptor signaling pathway	9.25117e-05	-9.28818	19	6	0.0606061	3.40124e+29	ninaC,inaD,Arr1,Fbxl4,Gbeta76C,Arr2
GO:0007603	phototransduction, visible light	9.25117e-05	-9.28818	19	6	0.0606061	3.60034e+29	trpl,Arr2,Gbeta76C,trp,ninaA,ninaC
GO:0071214	cellular response to abiotic stimulus	9.67864e-05	-9.243	36	8	0.0808081	4.38064e+39	Ekar,Arr2,tim,inaD,trp,Tsp42Ej,Gbeta76C,ninaC
GO:0104004	cellular response to environmental stimulus	9.67864e-05	-9.243	36	8	0.0808081	3.40124e+39	ninaC,Gbeta76C,inaD,Tsp42Ej,trp,tim,Ekar,Arr2
GO:0001895	retina homeostasis	0.000101213	-9.19828	7	4	0.040404	3.50784e+19	Arr1,trp,ninaC,Arr2
GO:0051100	negative regulation of binding	0.00029739	-8.12046	4	3	0.030303	389933357135078	Arr2,tim,Arr1
GO:0055074	calcium ion homeostasis	0.00029918	-8.11446	23	6	0.0606061	4.35414e+29	Capa,trp,Cbp53E,Cpn,up,trpl
GO:0006874	cellular calcium ion homeostasis	0.00029918	-8.11446	23	6	0.0606061	3.23144e+29	up,trpl,Cpn,trp,Cbp53E,Capa
GO:0072503	cellular divalent inorganic cation homeostasis	0.0004894	-7.62233	25	6	0.0606061	4.14743e+29	Cpn,up,trpl,Capa,Cbp53E,trp
GO:0048871	multicellular organismal homeostasis	0.0004894	-7.62233	25	6	0.0606061	3.89933e+29	Arr2,tim,ClC-a,ninaC,Arr1,trp
GO:0072507	divalent inorganic cation homeostasis	0.0004894	-7.62233	25	6	0.0606061	3.23144e+29	up,trpl,Cpn,trp,Cbp53E,Capa
GO:0045494	photoreceptor cell maintenance	0.000720284	-7.23586	5	3	0.030303	389933507834012	Arr2,Arr1,ninaC
GO:0009584	detection of visible light	0.000762761	-7.17857	27	6	0.0606061	3.89934e+29	Arr2,trpl,ninaA,ninaC,trp,Gbeta76C
GO:0009628	response to abiotic stimulus	0.000901848	-7.01106	159	16	0.161616	4.06274e+81	rtp,cu,laza,tim,ninaA,Tsp42Ej,inaF-B,Gbeta76C,Hph,Gad1,Ekar,Arr2,inaD,trp,trpl,ninaC
GO:0016056	rhodopsin mediated signaling pathway	0.00121147	-6.71592	12	4	0.040404	4.01483e+19	Gbeta76C,ninaC,trp,Arr2
GO:0023058	adaptation of signaling pathway	0.00139571	-6.57435	6	3	0.030303	389933507834012	Arr2,Arr1,ninaC
GO:0050962	detection of light stimulus involved in sensory perception	0.00139571	-6.57435	6	3	0.030303	360034354237629	trpl,trp,inaD
GO:0042592	homeostatic process	0.00163123	-6.41842	184	17	0.171717	4.35414e+84	Capa,trp,ATPCL,Drip,ClC-a,Arr2,Ilp2,ninaC,Arr1,Pfk,trpl,Smg6,up,Cbp53E,tim,Pgi,Cpn
GO:0002032	desensitization of G protein-coupled receptor signaling pathway by arrestin	0.0018237	-6.30689	2	2	0.020202	3507838993	Arr1,Arr2
GO:0032091	negative regulation of protein binding	0.0018237	-6.30689	2	2	0.020202	3507838993	Arr1,Arr2
GO:0006833	water transport	0.0018237	-6.30689	2	2	0.020202	3623641428	Drip,ClC-a
GO:0071454	cellular response to anoxia	0.0018237	-6.30689	2	2	0.020202	4354236003	trp,trpl
GO:0048878	chemical homeostasis	0.00209702	-6.16724	110	12	0.121212	4.14744e+59	Cpn,Ilp2,Capa,Cbp53E,ATPCL,trp,Drip,Pgi,ClC-a,trpl,up,Pfk
GO:0051480	regulation of cytosolic calcium ion concentration	0.00229231	-6.0782	14	4	0.040404	3.60034e+19	trpl,Capa,trp,Cbp53E
GO:0060249	anatomical structure homeostasis	0.002501	-5.99106	57	8	0.0808081	4.29943e+39	Smg6,up,Arr1,ninaC,Arr2,Ilp2,trp,Cbp53E
GO:0006875	cellular metal ion homeostasis	0.00316456	-5.75574	35	6	0.0606061	4.14743e+29	Cpn,up,trpl,Capa,trp,Cbp53E
GO:0050954	sensory perception of mechanical stimulus	0.00421549	-5.46899	26	5	0.0505051	3.89934e+24	Arr2,trpl,trp,mri,inaD
GO:0043604	amide biosynthetic process	0.00469469	-5.36132	121	12	0.121212	3.10094e+59	RpL36,RpL24-like,RpL18,RpS30,RpS9,RpS2,eEF1delta,mRpL36,CG12848,RpL12,ATPCL,RpL32
GO:0009059	macromolecule biosynthetic process	0.00471606	-5.35678	186	16	0.161616	4.29946e+79	Smg6,mRpL36,RpL12,RpL32,rdhB,RpL36,RpL24-like,RpS2,RpL18,RpS9,RpS30,eEF1delta,CG12848,tim,ninaA,app
GO:0050908	detection of light stimulus involved in visual perception	0.00531762	-5.23673	3	2	0.020202	4354236003	trp,trpl
GO:0006828	manganese ion transport	0.00531762	-5.23673	3	2	0.020202	4354236003	trp,trpl
GO:0045744	negative regulation of G protein-coupled receptor signaling pathway	0.00531762	-5.23673	3	2	0.020202	3507838993	Arr1,Arr2
GO:0002031	G protein-coupled receptor internalization	0.00531762	-5.23673	3	2	0.020202	3899335078	Arr2,Arr1
GO:0043393	regulation of protein binding	0.00531762	-5.23673	3	2	0.020202	3507838993	Arr1,Arr2
GO:0022401	negative adaptation of signaling pathway	0.00531762	-5.23673	3	2	0.020202	3899335078	Arr2,Arr1
GO:0002029	desensitization of G protein-coupled receptor signaling pathway	0.00531762	-5.23673	3	2	0.020202	3899335078	Arr2,Arr1
GO:0048521	negative regulation of behavior	0.00531762	-5.23673	3	2	0.020202	3237839150	Fbxl4,Ilp2
GO:0071484	cellular response to light intensity	0.00531762	-5.23673	3	2	0.020202	4380635620	Ekar,Tsp42Ej
GO:0030104	water homeostasis	0.00531762	-5.23673	3	2	0.020202	3623641428	Drip,ClC-a
GO:0050953	sensory perception of light stimulus	0.00613813	-5.09323	18	4	0.040404	4.35424e+19	trp,inaD,trpl,t
GO:0055065	metal ion homeostasis	0.00629035	-5.06874	40	6	0.0606061	4.14743e+29	Cpn,up,trpl,Capa,trp,Cbp53E
GO:0006412	translation	0.00681676	-4.98837	111	11	0.111111	5.01395e+54	CG12848,RpL12,RpL32,RpL36,RpL24-like,RpS2,RpS9,RpL18,RpS30,mRpL36,eEF1delta
GO:0043043	peptide biosynthetic process	0.00729232	-4.92093	112	11	0.111111	4.53295e+54	RpL12,CG12848,RpL32,RpL24-like,RpL36,mRpL36,eEF1delta,RpS2,RpS9,RpS30,RpL18
GO:0043112	receptor metabolic process	0.00738345	-4.90851	10	3	0.030303	350783899338484	Arr1,Arr2,Gad1
GO:0051098	regulation of binding	0.00738345	-4.90851	10	3	0.030303	389933357135078	Arr2,tim,Arr1
GO:0050906	detection of stimulus involved in sensory perception	0.00738345	-4.90851	10	3	0.030303	376294354236003	inaD,trp,trpl
GO:0055082	cellular chemical homeostasis	0.00807712	-4.81872	55	7	0.0707071	4.14744e+34	Cpn,trpl,Ilp2,up,Capa,trp,Cbp53E
GO:0036294	cellular response to decreased oxygen levels	0.00983912	-4.62139	11	3	0.030303	360034354240633	trpl,trp,Hph
GO:0016062	adaptation of rhodopsin mediated signaling	0.0103379	-4.57194	4	2	0.020202	3401238993	ninaC,Arr2
GO:0018208	peptidyl-proline modification	0.0103379	-4.57194	4	2	0.020202	3327140633	ninaA,Hph
GO:0036367	light adaption	0.0103379	-4.57194	4	2	0.020202	3401238993	ninaC,Arr2
GO:0034059	response to anoxia	0.0103379	-4.57194	4	2	0.020202	4354236003	trp,trpl
GO:0033617	mitochondrial respiratory chain complex IV assembly	0.0103379	-4.57194	4	2	0.020202	574041734998	CG34242,CG17996
GO:0001894	tissue homeostasis	0.010875	-4.52129	21	4	0.040404	3.40124e+19	ninaC,Arr1,trp,Arr2
GO:0007605	sensory perception of sound	0.010875	-4.52129	21	4	0.040404	3.60034e+19	trpl,Arr2,inaD,trp
GO:0042593	glucose homeostasis	0.010875	-4.52129	21	4	0.040404	3.91504e+19	Ilp2,Pfk,Pgi,ATPCL
GO:0071453	cellular response to oxygen levels	0.012715	-4.36497	12	3	0.030303	435424063336003	trp,Hph,trpl
GO:0006096	glycolytic process	0.012715	-4.36497	12	3	0.030303	360604344735886	Pfk,Pglym78,Pgi
GO:0042044	fluid transport	0.012715	-4.36497	12	3	0.030303	362364142843541	Drip,ClC-a,Capa
GO:0009743	response to carbohydrate	0.012715	-4.36497	12	3	0.030303	391503606035761	Ilp2,Pfk,ACC
GO:0006757	ATP generation from ADP	0.012715	-4.36497	12	3	0.030303	360604344735886	Pfk,Pglym78,Pgi
GO:0007186	G protein-coupled receptor signaling pathway	0.014072	-4.26356	61	7	0.0707071	4.35423e+34	trp,ninaC,Capa,Gbeta76C,ITP,5-HT2A,Arr2
GO:0034645	cellular macromolecule biosynthetic process	0.0152706	-4.18183	175	14	0.141414	4.35734e+69	RpL32,app,CG12848,tim,RpL12,RpS9,RpS30,RpL18,RpS2,Smg6,eEF1delta,mRpL36,RpL36,RpL24-like
GO:0007601	visual perception	0.0160217	-4.13381	13	3	0.030303	435423600331863	trp,trpl,t
GO:0046031	ADP metabolic process	0.0160217	-4.13381	13	3	0.030303	358864344736060	Pgi,Pglym78,Pfk
GO:0006165	nucleoside diphosphate phosphorylation	0.0160217	-4.13381	13	3	0.030303	360604344735886	Pfk,Pglym78,Pgi
GO:0046939	nucleotide phosphorylation	0.0160217	-4.13381	13	3	0.030303	358863606043447	Pgi,Pfk,Pglym78
GO:0016060	metarhodopsin inactivation	0.0167496	-4.08938	5	2	0.020202	3507838993	Arr1,Arr2
GO:0071322	cellular response to carbohydrate stimulus	0.0167496	-4.08938	5	2	0.020202	3576139150	ACC,Ilp2
GO:0033108	mitochondrial respiratory chain complex assembly	0.0197661	-3.92379	14	3	0.030303	3.74663e+16	ND-B12,CG17996,CG34242
GO:0030003	cellular cation homeostasis	0.0201809	-3.90302	51	6	0.0606061	3.60033e+29	trpl,up,Cpn,Cbp53E,trp,Capa
GO:0006873	cellular ion homeostasis	0.0220415	-3.81483	52	6	0.0606061	4.35414e+29	Capa,Cbp53E,trp,Cpn,trpl,up
GO:0016052	carbohydrate catabolic process	0.0230568	-3.76979	26	4	0.040404	4.53684e+19	Treh,Pgi,Pglym78,Pfk
GO:0033500	carbohydrate homeostasis	0.0230568	-3.76979	26	4	0.040404	3.67604e+19	ATPCL,Pgi,Pfk,Ilp2
GO:0009135	purine nucleoside diphosphate metabolic process	0.0239516	-3.73172	15	3	0.030303	360604344735886	Pfk,Pglym78,Pgi
GO:0009185	ribonucleoside diphosphate metabolic process	0.0239516	-3.73172	15	3	0.030303	360604344735886	Pfk,Pglym78,Pgi
GO:0009179	purine ribonucleoside diphosphate metabolic process	0.0239516	-3.73172	15	3	0.030303	360604344735886	Pfk,Pglym78,Pgi
GO:0031623	receptor internalization	0.0244265	-3.71209	6	2	0.020202	3899335078	Arr2,Arr1
GO:0042136	neurotransmitter biosynthetic process	0.0244265	-3.71209	6	2	0.020202	3848431863	Gad1,t
GO:0008535	respiratory chain complex IV assembly	0.0244265	-3.71209	6	2	0.020202	574041734998	CG34242,CG17996
GO:0019752	carboxylic acid metabolic process	0.0267846	-3.61993	101	9	0.0909091	4.02414e+44	CG5618,Pfk,ACC,Hph,CG6287,ATPCL,Pglym78,Pgi,Gad1
GO:0043436	oxoacid metabolic process	0.028353	-3.56302	102	9	0.0909091	4.02414e+44	CG5618,Hph,Pfk,ACC,CG6287,ATPCL,Pgi,Pglym78,Gad1
GO:0006082	organic acid metabolic process	0.028353	-3.56302	102	9	0.0909091	3.45544e+44	CG6287,ACC,Pfk,Hph,CG5618,Gad1,Pglym78,Pgi,ATPCL
GO:0009132	nucleoside diphosphate metabolic process	0.0285788	-3.55509	16	3	0.030303	434473606035886	Pglym78,Pfk,Pgi
GO:0002181	cytoplasmic translation	0.0306077	-3.4865	87	8	0.0808081	4.35735e+39	RpL32,RpL12,RpS2,RpS30,RpS9,RpL18,RpL36,RpL24-like
GO:0032787	monocarboxylic acid metabolic process	0.0306396	-3.48546	56	6	0.0606061	3.58864e+29	Pgi,Pglym78,Pfk,ACC,ATPCL,Gad1
GO:0098771	inorganic ion homeostasis	0.0306396	-3.48546	56	6	0.0606061	4.14744e+29	Cpn,trpl,up,Capa,trp,Cbp53E
GO:0032101	regulation of response to external stimulus	0.0325053	-3.42635	88	8	0.0808081	3.24003e+39	NetB,ninaC,Arr1,Fbxl4,Gbeta76C,Arr2,inaD,Pitslre
GO:0055080	cation homeostasis	0.0330901	-3.40852	57	6	0.0606061	4.35424e+29	trp,Cbp53E,Capa,trpl,up,Cpn
GO:0004713	protein tyrosine kinase activity	0.0332504	-3.40369	7	2	0.020202	3401241118	ninaC,FER
GO:0016057	regulation of membrane potential in photoreceptor cell	0.0332504	-3.40369	7	2	0.020202	867411443806	inaF-B,Ekar
GO:0060259	regulation of feeding behavior	0.0332504	-3.40369	7	2	0.020202	3915040575	Ilp2,5-HT2A
GO:0006518	peptide metabolic process	0.0344969	-3.36689	140	11	0.111111	4.35735e+54	RpL32,RpL12,CG12848,eEF1delta,mRpL36,RpS30,RpS9,RpL18,RpS2,RpL24-like,RpL36
GO:0043603	cellular amide metabolic process	0.0348756	-3.35597	158	12	0.121212	5.01394e+59	CG12848,ATPCL,RpL12,RpL32,RpL36,RpL24-like,RpS2,RpS9,RpL18,RpS30,mRpL36,eEF1delta
GO:0044092	negative regulation of molecular function	0.0378651	-3.27372	44	5	0.0505051	3.35713e+26	tim,conu,Arr1,Arr2,Slob
GO:0006090	pyruvate metabolic process	0.039147	-3.24043	18	3	0.030303	360604344735886	Pfk,Pglym78,Pgi
GO:0019722	calcium-mediated signaling	0.039147	-3.24043	18	3	0.030303	478783375236003	Eip63F-1,TpnC25D,trpl
GO:0007600	sensory perception	0.0392983	-3.23657	75	7	0.0707071	3.50784e+34	Arr1,trp,inaD,mri,t,Arr2,trpl
GO:0050801	ion homeostasis	0.0411962	-3.18941	60	6	0.0606061	3.69054e+29	Cbp53E,trp,Capa,trpl,up,Cpn
GO:0034260	negative regulation of GTPase activity	0.0429129	-3.14858	1	1	0.010101	3355133	conu
GO:2000677	regulation of transcription regulatory region DNA binding	0.0429129	-3.14858	1	1	0.010101	33571	tim
GO:0061615	glycolytic process through fructose-6-phosphate	0.0429129	-3.14858	1	1	0.010101	36060	Pfk
GO:0052129	negative energy taxis	0.0429129	-3.14858	1	1	0.010101	33571	tim
GO:0051890	regulation of cardioblast differentiation	0.0429129	-3.14858	1	1	0.010101	38846	lqf
GO:0030321	transepithelial chloride transport	0.0429129	-3.14858	1	1	0.010101	41428	ClC-a
GO:0050891	multicellular organismal water homeostasis	0.0429129	-3.14858	1	1	0.010101	41428	ClC-a
GO:0032094	response to food	0.0429129	-3.14858	1	1	0.010101	39150	Ilp2
GO:0071326	cellular response to monosaccharide stimulus	0.0429129	-3.14858	1	1	0.010101	39150	Ilp2
GO:0018230	peptidyl-L-cysteine S-palmitoylation	0.0429129	-3.14858	1	1	0.010101	39399	app
GO:0009449	gamma-aminobutyric acid biosynthetic process	0.0429129	-3.14858	1	1	0.010101	38484	Gad1
GO:0051892	negative regulation of cardioblast differentiation	0.0429129	-3.14858	1	1	0.010101	38846	lqf
GO:0009644	response to high light intensity	0.0429129	-3.14858	1	1	0.010101	35620	Tsp42Ej
GO:0008519	ammonium transmembrane transporter activity	0.0429129	-3.14858	1	1	0.010101	38589	Rh50
GO:0045903	positive regulation of translational fidelity	0.0429129	-3.14858	1	1	0.010101	39108	RpS9
GO:0035377	transepithelial water transport	0.0429129	-3.14858	1	1	0.010101	41428	ClC-a
GO:0010677	negative regulation of cellular carbohydrate metabolic process	0.0429129	-3.14858	1	1	0.010101	39150	Ilp2
GO:0045912	negative regulation of carbohydrate metabolic process	0.0429129	-3.14858	1	1	0.010101	39150	Ilp2
GO:1903352	L-ornithine transmembrane transport	0.0429129	-3.14858	1	1	0.010101	31990	CG1628
GO:0008156	negative regulation of DNA replication	0.0429129	-3.14858	1	1	0.010101	33571	tim
GO:0009448	gamma-aminobutyric acid metabolic process	0.0429129	-3.14858	1	1	0.010101	38484	Gad1
GO:0045818	negative regulation of glycogen catabolic process	0.0429129	-3.14858	1	1	0.010101	39150	Ilp2
GO:0042754	negative regulation of circadian rhythm	0.0429129	-3.14858	1	1	0.010101	32378	Fbxl4
GO:0034219	carbohydrate transmembrane transport	0.0429129	-3.14858	1	1	0.010101	39670	CG7272
GO:1902001	fatty acid transmembrane transport	0.0429129	-3.14858	1	1	0.010101	32992	Pmp70
GO:0038060	nitric oxide-cGMP-mediated signaling pathway	0.0429129	-3.14858	1	1	0.010101	43541	Capa
GO:0003091	renal water homeostasis	0.0429129	-3.14858	1	1	0.010101	41428	ClC-a
GO:0018345	protein palmitoylation	0.0429129	-3.14858	1	1	0.010101	39399	app
GO:0046352	disaccharide catabolic process	0.0429129	-3.14858	1	1	0.010101	45368	Treh
GO:0006735	NADH regeneration	0.0429129	-3.14858	1	1	0.010101	36060	Pfk
GO:0001692	histamine metabolic process	0.0429129	-3.14858	1	1	0.010101	31863	t
GO:1900029	positive regulation of ruffle assembly	0.0429129	-3.14858	1	1	0.010101	31224	PsGEF
GO:0032228	regulation of synaptic transmission, GABAergic	0.0429129	-3.14858	1	1	0.010101	32378	Fbxl4
GO:0031543	peptidyl-proline dioxygenase activity	0.0429129	-3.14858	1	1	0.010101	40633	Hph
GO:0071331	cellular response to hexose stimulus	0.0429129	-3.14858	1	1	0.010101	39150	Ilp2
GO:1901555	response to paclitaxel	0.0429129	-3.14858	1	1	0.010101	40627	rtp
GO:0036059	nephrocyte diaphragm assembly	0.0429129	-3.14858	1	1	0.010101	41062	pyd
GO:0061621	canonical glycolysis	0.0429129	-3.14858	1	1	0.010101	36060	Pfk
GO:0042321	negative regulation of circadian sleep/wake cycle, sleep	0.0429129	-3.14858	1	1	0.010101	32378	Fbxl4
GO:0048478	replication fork protection	0.0429129	-3.14858	1	1	0.010101	33571	tim
GO:0015075	ion transmembrane transporter activity	0.0429129	-3.14858	1	1	0.010101	36003	trpl
GO:0003746	translation elongation factor activity	0.0429129	-3.14858	1	1	0.010101	34363	eEF1delta
GO:0098664	G protein-coupled serotonin receptor signaling pathway	0.0429129	-3.14858	1	1	0.010101	40575	5-HT2A
GO:0071333	cellular response to glucose stimulus	0.0429129	-3.14858	1	1	0.010101	39150	Ilp2
GO:0046957	negative phototaxis	0.0429129	-3.14858	1	1	0.010101	33571	tim
GO:0019511	peptidyl-proline hydroxylation	0.0429129	-3.14858	1	1	0.010101	40633	Hph
GO:0036058	filtration diaphragm assembly	0.0429129	-3.14858	1	1	0.010101	41062	pyd
GO:2000678	negative regulation of transcription regulatory region DNA binding	0.0429129	-3.14858	1	1	0.010101	33571	tim
GO:0000076	DNA replication checkpoint	0.0429129	-3.14858	1	1	0.010101	33571	tim
GO:2000252	negative regulation of feeding behavior	0.0429129	-3.14858	1	1	0.010101	39150	Ilp2
GO:0035156	fusion cell fate specification	0.0429129	-3.14858	1	1	0.010101	41062	pyd
GO:0018231	peptidyl-S-diacylglycerol-L-cysteine biosynthetic process from peptidyl-cysteine	0.0429129	-3.14858	1	1	0.010101	39399	app
GO:0015822	ornithine transport	0.0429129	-3.14858	1	1	0.010101	31990	CG1628
GO:0009997	negative regulation of cardioblast cell fate specification	0.0429129	-3.14858	1	1	0.010101	38846	lqf
GO:1990575	mitochondrial L-ornithine transmembrane transport	0.0429129	-3.14858	1	1	0.010101	31990	CG1628
GO:0043111	replication fork arrest	0.0429129	-3.14858	1	1	0.010101	33571	tim
GO:0003097	renal water transport	0.0429129	-3.14858	1	1	0.010101	41428	ClC-a
GO:0005993	trehalose catabolic process	0.0429129	-3.14858	1	1	0.010101	45368	Treh
GO:0060048	cardiac muscle contraction	0.0429129	-3.14858	1	1	0.010101	32314	up
GO:0042686	regulation of cardioblast cell fate specification	0.0429129	-3.14858	1	1	0.010101	38846	lqf
GO:2000044	negative regulation of cardiac cell fate specification	0.0429129	-3.14858	1	1	0.010101	38846	lqf
GO:0000064	L-ornithine transmembrane transporter activity	0.0429129	-3.14858	1	1	0.010101	31990	CG1628
GO:0003872	6-phosphofructokinase activity	0.0429129	-3.14858	1	1	0.010101	36060	Pfk
GO:0001694	histamine biosynthetic process	0.0429129	-3.14858	1	1	0.010101	31863	t
GO:2000043	regulation of cardiac cell fate specification	0.0429129	-3.14858	1	1	0.010101	38846	lqf
GO:0015910	long-chain fatty acid import into peroxisome	0.0429129	-3.14858	1	1	0.010101	32992	Pmp70
GO:0045005	DNA-dependent DNA replication maintenance of fidelity	0.0429129	-3.14858	1	1	0.010101	33571	tim
GO:0006450	regulation of translational fidelity	0.0429129	-3.14858	1	1	0.010101	39108	RpS9
GO:0009313	oligosaccharide catabolic process	0.0429129	-3.14858	1	1	0.010101	45368	Treh
GO:0070874	negative regulation of glycogen metabolic process	0.0429129	-3.14858	1	1	0.010101	39150	Ilp2
GO:0004993	G protein-coupled serotonin receptor activity	0.0429129	-3.14858	1	1	0.010101	40575	5-HT2A
GO:1905208	negative regulation of cardiocyte differentiation	0.0429129	-3.14858	1	1	0.010101	38846	lqf
GO:0072488	ammonium transmembrane transport	0.0429129	-3.14858	1	1	0.010101	38589	Rh50
GO:0071486	cellular response to high light intensity	0.0429129	-3.14858	1	1	0.010101	35620	Tsp42Ej
GO:0009758	carbohydrate utilization	0.0429129	-3.14858	1	1	0.010101	39150	Ilp2
GO:1990146	protein localization to rhabdomere	0.0429129	-3.14858	1	1	0.010101	34012	ninaC
GO:0018401	peptidyl-proline hydroxylation to 4-hydroxy-L-proline	0.0429129	-3.14858	1	1	0.010101	40633	Hph
GO:0061718	glucose catabolic process to pyruvate	0.0429129	-3.14858	1	1	0.010101	36060	Pfk
GO:0007263	nitric oxide mediated signal transduction	0.0429129	-3.14858	1	1	0.010101	43541	Capa
GO:0019471	4-hydroxyproline metabolic process	0.0429129	-3.14858	1	1	0.010101	40633	Hph
GO:1900271	regulation of long-term synaptic potentiation	0.0429129	-3.14858	1	1	0.010101	36905	Cbp53E
GO:0007210	serotonin receptor signaling pathway	0.0429129	-3.14858	1	1	0.010101	40575	5-HT2A
GO:1900027	regulation of ruffle assembly	0.0429129	-3.14858	1	1	0.010101	31224	PsGEF
GO:2000104	negative regulation of DNA-dependent DNA replication	0.0429129	-3.14858	1	1	0.010101	33571	tim
GO:0052803	imidazole-containing compound metabolic process	0.0429129	-3.14858	1	1	0.010101	31863	t
GO:0032229	negative regulation of synaptic transmission, GABAergic	0.0429129	-3.14858	1	1	0.010101	32378	Fbxl4
GO:0061620	glycolytic process through glucose-6-phosphate	0.0429129	-3.14858	1	1	0.010101	36060	Pfk
GO:0050878	regulation of body fluid levels	0.0431109	-3.14398	8	2	0.020202	3600341428	trpl,ClC-a
GO:0018108	peptidyl-tyrosine phosphorylation	0.0431109	-3.14398	8	2	0.020202	4111834012	FER,ninaC
GO:0018212	peptidyl-tyrosine modification	0.0431109	-3.14398	8	2	0.020202	3401241118	ninaC,FER
GO:0000075	cell cycle checkpoint	0.0431109	-3.14398	8	2	0.020202	3357141670	tim,B52
GO:0018193	peptidyl-amino acid modification	0.0472449	-3.05241	62	6	0.0606061	3.93994e+29	app,FER,ninaC,ninaA,Hph,Pkc53E
GO:0048066	developmental pigmentation	0.0514257	-2.96762	20	3	0.030303	318634261433271	t,rdhB,ninaA
GO:0043473	pigmentation	0.0514257	-2.96762	20	3	0.030303	332713186342614	ninaA,t,rdhB
GO:0016063	rhodopsin biosynthetic process	0.0539045	-2.92054	9	2	0.020202	4261433271	rdhB,ninaA
GO:0006006	glucose metabolic process	0.0539045	-2.92054	9	2	0.020202	3606035886	Pfk,Pgi
GO:0003014	renal system process	0.0539045	-2.92054	9	2	0.020202	4142836236	ClC-a,Drip
GO:0046154	rhodopsin metabolic process	0.0539045	-2.92054	9	2	0.020202	3327142614	ninaA,rdhB
GO:0009744	response to sucrose	0.0539045	-2.92054	9	2	0.020202	3576136060	ACC,Pfk
GO:0050795	regulation of behavior	0.0562539	-2.87788	49	5	0.0505051	3.23784e+24	Fbxl4,Drip,tim,5-HT2A,Ilp2
GO:0036293	response to decreased oxygen levels	0.0581841	-2.84414	21	3	0.030303	360034354240633	trpl,trp,Hph
GO:0072330	monocarboxylic acid biosynthetic process	0.0581841	-2.84414	21	3	0.030303	367603576138484	ATPCL,ACC,Gad1
GO:0006898	receptor-mediated endocytosis	0.0581841	-2.84414	21	3	0.030303	350783899338846	Arr1,Arr2,lqf
GO:0017004	cytochrome complex assembly	0.0655348	-2.72517	10	2	0.020202	574041734998	CG34242,CG17996
GO:0000041	transition metal ion transport	0.0655348	-2.72517	10	2	0.020202	4354236003	trp,trpl
GO:0042133	neurotransmitter metabolic process	0.0655348	-2.72517	10	2	0.020202	3848431863	Gad1,t
GO:0042045	epithelial fluid transport	0.0655348	-2.72517	10	2	0.020202	4354141428	Capa,ClC-a
GO:0034285	response to disaccharide	0.0655348	-2.72517	10	2	0.020202	3576136060	ACC,Pfk
GO:0000027	ribosomal large subunit assembly	0.0655348	-2.72517	10	2	0.020202	4532941372	RpL12,RpL24-like
GO:0070633	transepithelial transport	0.0655348	-2.72517	10	2	0.020202	4354141428	Capa,ClC-a
GO:0045475	locomotor rhythm	0.0713078	-2.64075	37	4	0.040404	3.91504e+19	Ilp2,cu,ITP,tim
GO:0019932	second-messenger-mediated signaling	0.0713078	-2.64075	37	4	0.040404	3.37524e+19	TpnC25D,trpl,Capa,Eip63F-1
GO:0051146	striated muscle cell differentiation	0.0741128	-2.60217	53	5	0.0505051	3.60604e+24	Pfk,Pglym78,Mlp60A,up,Zasp52
GO:0045747	positive regulation of Notch signaling pathway	0.0779116	-2.55218	11	2	0.020202	3884641062	lqf,pyd
GO:0042692	muscle cell differentiation	0.0790117	-2.53816	54	5	0.0505051	3.23144e+24	up,Zasp52,Mlp60A,Pglym78,Pfk
GO:0001659	temperature homeostasis	0.084002	-2.47691	2	1	0.010101	33571	tim
GO:0006275	regulation of DNA replication	0.084002	-2.47691	2	1	0.010101	33571	tim
GO:0006085	acetyl-CoA biosynthetic process	0.084002	-2.47691	2	1	0.010101	36760	ATPCL
GO:0099509	regulation of presynaptic cytosolic calcium ion concentration	0.084002	-2.47691	2	1	0.010101	36905	Cbp53E
GO:0060047	heart contraction	0.084002	-2.47691	2	1	0.010101	32314	up
GO:0035020	regulation of Rac protein signal transduction	0.084002	-2.47691	2	1	0.010101	31224	PsGEF
GO:2000289	regulation of photoreceptor cell axon guidance	0.084002	-2.47691	2	1	0.010101	32400	NetB
GO:0009749	response to glucose	0.084002	-2.47691	2	1	0.010101	39150	Ilp2
GO:0043574	peroxisomal transport	0.084002	-2.47691	2	1	0.010101	32992	Pmp70
GO:0034284	response to monosaccharide	0.084002	-2.47691	2	1	0.010101	39150	Ilp2
GO:0032528	microvillus organization	0.084002	-2.47691	2	1	0.010101	43690	chp
GO:1902388	ceramide 1-phosphate transfer activity	0.084002	-2.47691	2	1	0.010101	246587	CG30392
GO:0048644	muscle organ morphogenesis	0.084002	-2.47691	2	1	0.010101	32314	up
GO:0035153	epithelial cell type specification, open tracheal system	0.084002	-2.47691	2	1	0.010101	41062	pyd
GO:1900274	regulation of phospholipase C activity	0.084002	-2.47691	2	1	0.010101	40148	Gbeta76C
GO:0010833	telomere maintenance via telomere lengthening	0.084002	-2.47691	2	1	0.010101	42994	Smg6
GO:0035627	ceramide transport	0.084002	-2.47691	2	1	0.010101	246587	CG30392
GO:0060086	circadian temperature homeostasis	0.084002	-2.47691	2	1	0.010101	33571	tim
GO:0008377	light-induced release of internally sequestered calcium ion	0.084002	-2.47691	2	1	0.010101	43542	trp
GO:0010518	positive regulation of phospholipase activity	0.084002	-2.47691	2	1	0.010101	40148	Gbeta76C
GO:0060191	regulation of lipase activity	0.084002	-2.47691	2	1	0.010101	40148	Gbeta76C
GO:0006278	RNA-dependent DNA biosynthetic process	0.084002	-2.47691	2	1	0.010101	42994	Smg6
GO:0032210	regulation of telomere maintenance via telomerase	0.084002	-2.47691	2	1	0.010101	42994	Smg6
GO:0060193	positive regulation of lipase activity	0.084002	-2.47691	2	1	0.010101	40148	Gbeta76C
GO:0061964	negative regulation of entry into reproductive diapause	0.084002	-2.47691	2	1	0.010101	39150	Ilp2
GO:0007004	telomere maintenance via telomerase	0.084002	-2.47691	2	1	0.010101	42994	Smg6
GO:0010863	positive regulation of phospholipase C activity	0.084002	-2.47691	2	1	0.010101	40148	Gbeta76C
GO:2000278	regulation of DNA biosynthetic process	0.084002	-2.47691	2	1	0.010101	42994	Smg6
GO:0009746	response to hexose	0.084002	-2.47691	2	1	0.010101	39150	Ilp2
GO:0007202	activation of phospholipase C activity	0.084002	-2.47691	2	1	0.010101	40148	Gbeta76C
GO:0010517	regulation of phospholipase activity	0.084002	-2.47691	2	1	0.010101	40148	Gbeta76C
GO:1904356	regulation of telomere maintenance via telomere lengthening	0.084002	-2.47691	2	1	0.010101	42994	Smg6
GO:0032204	regulation of telomere maintenance	0.084002	-2.47691	2	1	0.010101	42994	Smg6
GO:0003009	skeletal muscle contraction	0.084002	-2.47691	2	1	0.010101	32314	up
GO:1902389	ceramide 1-phosphate transport	0.084002	-2.47691	2	1	0.010101	246587	CG30392
GO:0003053	circadian regulation of heart rate	0.084002	-2.47691	2	1	0.010101	33571	tim
GO:0043392	negative regulation of DNA binding	0.084002	-2.47691	2	1	0.010101	33571	tim
GO:0006101	citrate metabolic process	0.084002	-2.47691	2	1	0.010101	36760	ATPCL
GO:0007589	body fluid secretion	0.084002	-2.47691	2	1	0.010101	36003	trpl
GO:0008643	carbohydrate transport	0.084002	-2.47691	2	1	0.010101	39670	CG7272
GO:0008015	blood circulation	0.084002	-2.47691	2	1	0.010101	32314	up
GO:0035022	positive regulation of Rac protein signal transduction	0.084002	-2.47691	2	1	0.010101	31224	PsGEF
GO:0051208	sequestering of calcium ion	0.084002	-2.47691	2	1	0.010101	41474	Cpn
GO:0030388	fructose 1,6-bisphosphate metabolic process	0.084002	-2.47691	2	1	0.010101	36060	Pfk
GO:1902626	assembly of large subunit precursor of preribosome	0.084002	-2.47691	2	1	0.010101	41372	RpL24-like
GO:0090329	regulation of DNA-dependent DNA replication	0.084002	-2.47691	2	1	0.010101	33571	tim
GO:0015919	peroxisomal membrane transport	0.084002	-2.47691	2	1	0.010101	32992	Pmp70
GO:0048104	establishment of body hair or bristle planar orientation	0.084002	-2.47691	2	1	0.010101	39399	app
GO:0120009	intermembrane lipid transfer	0.084002	-2.47691	2	1	0.010101	246587	CG30392
GO:0040009	regulation of growth rate	0.084002	-2.47691	2	1	0.010101	39150	Ilp2
GO:0004540	ribonuclease activity	0.084002	-2.47691	2	1	0.010101	42994	Smg6
GO:0097150	neuronal stem cell population maintenance	0.084002	-2.47691	2	1	0.010101	45368	Treh
GO:0006941	striated muscle contraction	0.084002	-2.47691	2	1	0.010101	32314	up
GO:1905207	regulation of cardiocyte differentiation	0.084002	-2.47691	2	1	0.010101	38846	lqf
GO:0006007	glucose catabolic process	0.084002	-2.47691	2	1	0.010101	36060	Pfk
GO:0030239	myofibril assembly	0.0890619	-2.41842	25	3	0.030303	378533674032314	Mlp60A,Zasp52,up
GO:0048512	circadian behavior	0.0896224	-2.41215	40	4	0.040404	3.35714e+19	tim,ITP,Ilp2,cu
GO:0007622	rhythmic behavior	0.102974	-2.27328	42	4	0.040404	3.79214e+19	ITP,cu,Ilp2,tim
GO:0032543	mitochondrial translation	0.104574	-2.25786	13	2	0.020202	5915150139	mRpL36,CG12848
GO:0070482	response to oxygen levels	0.106606	-2.23862	27	3	0.030303	406334354236003	Hph,trp,trpl
GO:0019725	cellular homeostasis	0.114415	-2.16793	96	7	0.0707071	3.69054e+34	Cbp53E,trp,Capa,up,Ilp2,trpl,Cpn
GO:0030307	positive regulation of cell growth	0.118709	-2.13108	14	2	0.020202	3915040633	Ilp2,Hph
GO:0019318	hexose metabolic process	0.118709	-2.13108	14	2	0.020202	3588636060	Pgi,Pfk
GO:0045806	negative regulation of endocytosis	0.123344	-2.09278	3	1	0.010101	41062	pyd
GO:1904589	regulation of protein import	0.123344	-2.09278	3	1	0.010101	33571	tim
GO:0006002	fructose 6-phosphate metabolic process	0.123344	-2.09278	3	1	0.010101	36060	Pfk
GO:0003755	peptidyl-prolyl cis-trans isomerase activity	0.123344	-2.09278	3	1	0.010101	33271	ninaA
GO:0030240	skeletal muscle thin filament assembly	0.123344	-2.09278	3	1	0.010101	32314	up
GO:0042416	dopamine biosynthetic process	0.123344	-2.09278	3	1	0.010101	31863	t
GO:0051262	protein tetramerization	0.123344	-2.09278	3	1	0.010101	36060	Pfk
GO:0007432	salivary gland boundary specification	0.123344	-2.09278	3	1	0.010101	32400	NetB
GO:0007377	germ-band extension	0.123344	-2.09278	3	1	0.010101	40575	5-HT2A
GO:0070059	intrinsic apoptotic signaling pathway in response to endoplasmic reticulum stress	0.123344	-2.09278	3	1	0.010101	33271	ninaA
GO:0042423	catecholamine biosynthetic process	0.123344	-2.09278	3	1	0.010101	31863	t
GO:0018126	protein hydroxylation	0.123344	-2.09278	3	1	0.010101	40633	Hph
GO:0006734	NADH metabolic process	0.123344	-2.09278	3	1	0.010101	36060	Pfk
GO:0061963	regulation of entry into reproductive diapause	0.123344	-2.09278	3	1	0.010101	39150	Ilp2
GO:0051289	protein homotetramerization	0.123344	-2.09278	3	1	0.010101	36060	Pfk
GO:0009713	catechol-containing compound biosynthetic process	0.123344	-2.09278	3	1	0.010101	31863	t
GO:0006538	glutamate catabolic process	0.123344	-2.09278	3	1	0.010101	38484	Gad1
GO:0045213	neurotransmitter receptor metabolic process	0.123344	-2.09278	3	1	0.010101	38484	Gad1
GO:0046189	phenol-containing compound biosynthetic process	0.123344	-2.09278	3	1	0.010101	31863	t
GO:2000737	negative regulation of stem cell differentiation	0.123344	-2.09278	3	1	0.010101	38846	lqf
GO:0097193	intrinsic apoptotic signaling pathway	0.123344	-2.09278	3	1	0.010101	33271	ninaA
GO:0097327	response to antineoplastic agent	0.123344	-2.09278	3	1	0.010101	40627	rtp
GO:0019674	NAD metabolic process	0.123344	-2.09278	3	1	0.010101	36060	Pfk
GO:0050879	multicellular organismal movement	0.123344	-2.09278	3	1	0.010101	32314	up
GO:0070983	dendrite guidance	0.123344	-2.09278	3	1	0.010101	32400	NetB
GO:0032780	negative regulation of ATPase activity	0.123344	-2.09278	3	1	0.010101	34038	Slob
GO:0006084	acetyl-CoA metabolic process	0.123344	-2.09278	3	1	0.010101	36760	ATPCL
GO:0001952	regulation of cell-matrix adhesion	0.123344	-2.09278	3	1	0.010101	36740	Zasp52
GO:0000413	protein peptidyl-prolyl isomerization	0.123344	-2.09278	3	1	0.010101	33271	ninaA
GO:0001678	cellular glucose homeostasis	0.123344	-2.09278	3	1	0.010101	39150	Ilp2
GO:0050881	musculoskeletal movement	0.123344	-2.09278	3	1	0.010101	32314	up
GO:0060250	germ-line stem-cell niche homeostasis	0.123344	-2.09278	3	1	0.010101	39150	Ilp2
GO:0044819	mitotic G1/S transition checkpoint	0.123344	-2.09278	3	1	0.010101	41670	B52
GO:0042306	regulation of protein import into nucleus	0.123344	-2.09278	3	1	0.010101	33571	tim
GO:0000956	nuclear-transcribed mRNA catabolic process	0.133287	-2.01525	15	2	0.020202	4133942994	cu,Smg6
GO:0045786	negative regulation of cell cycle	0.133287	-2.01525	15	2	0.020202	3357141670	tim,B52
GO:0140053	mitochondrial gene expression	0.133287	-2.01525	15	2	0.020202	5915150139	mRpL36,CG12848
GO:0007623	circadian rhythm	0.147988	-1.91062	48	4	0.040404	3.91504e+19	Ilp2,cu,ITP,tim
GO:0030155	regulation of cell adhesion	0.148246	-1.90889	16	2	0.020202	4106236740	pyd,Zasp52
GO:0043474	pigment metabolic process involved in pigmentation	0.148246	-1.90889	16	2	0.020202	3327142614	ninaA,rdhB
GO:0043324	pigment metabolic process involved in developmental pigmentation	0.148246	-1.90889	16	2	0.020202	4261433271	rdhB,ninaA
GO:0016476	regulation of embryonic cell shape	0.148246	-1.90889	16	2	0.020202	4111841062	FER,pyd
GO:0042441	eye pigment metabolic process	0.148246	-1.90889	16	2	0.020202	3327142614	ninaA,rdhB
GO:0006726	eye pigment biosynthetic process	0.148246	-1.90889	16	2	0.020202	4261433271	rdhB,ninaA
GO:1901617	organic hydroxy compound biosynthetic process	0.148246	-1.90889	16	2	0.020202	3178231863	CG12116,t
GO:0004672	protein kinase activity	0.155566	-1.86069	32	3	0.030303	340124278434038	ninaC,CG31145,Slob
GO:0048511	rhythmic process	0.156143	-1.85699	49	4	0.040404	3.35714e+19	tim,ITP,cu,Ilp2
GO:0006468	protein phosphorylation	0.160697	-1.82824	86	6	0.0606061	3.40384e+29	Slob,CG31145,FER,ninaC,Pitslre,Pkc53E
GO:0043649	dicarboxylic acid catabolic process	0.161013	-1.82627	4	1	0.010101	38484	Gad1
GO:0000723	telomere maintenance	0.161013	-1.82627	4	1	0.010101	42994	Smg6
GO:0015908	fatty acid transport	0.161013	-1.82627	4	1	0.010101	32992	Pmp70
GO:0071329	cellular response to sucrose stimulus	0.161013	-1.82627	4	1	0.010101	35761	ACC
GO:0072350	tricarboxylic acid metabolic process	0.161013	-1.82627	4	1	0.010101	36760	ATPCL
GO:0015909	long-chain fatty acid transport	0.161013	-1.82627	4	1	0.010101	32992	Pmp70
GO:0046365	monosaccharide catabolic process	0.161013	-1.82627	4	1	0.010101	36060	Pfk
GO:0010810	regulation of cell-substrate adhesion	0.161013	-1.82627	4	1	0.010101	36740	Zasp52
GO:1903035	negative regulation of response to wounding	0.161013	-1.82627	4	1	0.010101	36905	Cbp53E
GO:0048067	cuticle pigmentation	0.161013	-1.82627	4	1	0.010101	31863	t
GO:0019320	hexose catabolic process	0.161013	-1.82627	4	1	0.010101	36060	Pfk
GO:0015696	ammonium transport	0.161013	-1.82627	4	1	0.010101	38589	Rh50
GO:0071324	cellular response to disaccharide stimulus	0.161013	-1.82627	4	1	0.010101	35761	ACC
GO:0018198	peptidyl-cysteine modification	0.161013	-1.82627	4	1	0.010101	39399	app
GO:0005981	regulation of glycogen catabolic process	0.161013	-1.82627	4	1	0.010101	39150	Ilp2
GO:0009309	amine biosynthetic process	0.161013	-1.82627	4	1	0.010101	31863	t
GO:0043471	regulation of cellular carbohydrate catabolic process	0.161013	-1.82627	4	1	0.010101	39150	Ilp2
GO:0006517	protein deglycosylation	0.161013	-1.82627	4	1	0.010101	33271	ninaA
GO:0007604	phototransduction, UV	0.161013	-1.82627	4	1	0.010101	34012	ninaC
GO:0005991	trehalose metabolic process	0.161013	-1.82627	4	1	0.010101	45368	Treh
GO:0007562	eclosion	0.161013	-1.82627	4	1	0.010101	33571	tim
GO:0042401	cellular biogenic amine biosynthetic process	0.161013	-1.82627	4	1	0.010101	31863	t
GO:0035041	sperm chromatin decondensation	0.161013	-1.82627	4	1	0.010101	43559	Nph
GO:1902807	negative regulation of cell cycle G1/S phase transition	0.161013	-1.82627	4	1	0.010101	41670	B52
GO:0007620	copulation	0.161013	-1.82627	4	1	0.010101	33571	tim
GO:0008062	eclosion rhythm	0.161013	-1.82627	4	1	0.010101	33571	tim
GO:1900180	regulation of protein localization to nucleus	0.161013	-1.82627	4	1	0.010101	33571	tim
GO:2000134	negative regulation of G1/S transition of mitotic cell cycle	0.161013	-1.82627	4	1	0.010101	41670	B52
GO:0032200	telomere organization	0.161013	-1.82627	4	1	0.010101	42994	Smg6
GO:0007634	optokinetic behavior	0.161013	-1.82627	4	1	0.010101	43806	Ekar
GO:0006491	N-glycan processing	0.161013	-1.82627	4	1	0.010101	33271	ninaA
GO:0071632	optomotor response	0.161013	-1.82627	4	1	0.010101	43806	Ekar
GO:0019934	cGMP-mediated signaling	0.161013	-1.82627	4	1	0.010101	43541	Capa
GO:0048069	eye pigmentation	0.163526	-1.81079	17	2	0.020202	3327142614	ninaA,rdhB
GO:0005996	monosaccharide metabolic process	0.163526	-1.81079	17	2	0.020202	3588636060	Pgi,Pfk
GO:0016310	phosphorylation	0.165653	-1.79786	165	10	0.10101	3.74663e+49	ND-B12,Slob,CG31145,FER,ninaC,Pfk,Pkc53E,Pitslre,Pgi,Pglym78
GO:0055002	striated muscle cell development	0.166096	-1.79519	33	3	0.030303	378533231436740	Mlp60A,up,Zasp52
GO:0055001	muscle cell development	0.166096	-1.79519	33	3	0.030303	367403231437853	Zasp52,up,Mlp60A
GO:0003008	system process	0.169133	-1.77707	186	11	0.111111	3.18634e+54	t,Arr2,Gad1,trp,inaD,ClC-a,Drip,up,trpl,Arr1,mri
GO:0007005	mitochondrion organization	0.17161	-1.76253	69	5	0.0505051	4.35426e+26	trp,CG34242,up,CG17996,ND-B12
GO:0044283	small molecule biosynthetic process	0.178907	-1.72089	70	5	0.0505051	3.84844e+24	Gad1,ATPCL,CG12116,Pgi,ACC
GO:0070588	calcium ion transmembrane transport	0.179073	-1.71996	18	2	0.020202	4354236003	trp,trpl
GO:0045187	regulation of circadian sleep/wake cycle, sleep	0.179073	-1.71996	18	2	0.020202	3237833571	Fbxl4,tim
GO:0045214	sarcomere organization	0.179073	-1.71996	18	2	0.020202	3785332314	Mlp60A,up
GO:0009108	coenzyme biosynthetic process	0.194837	-1.63559	19	2	0.020202	3178236760	CG12116,ATPCL
GO:0007369	gastrulation	0.194837	-1.63559	19	2	0.020202	4057538006	5-HT2A,gol
GO:0007218	neuropeptide signaling pathway	0.194837	-1.63559	19	2	0.020202	3792143541	ITP,Capa
GO:0006633	fatty acid biosynthetic process	0.194837	-1.63559	19	2	0.020202	3676035761	ATPCL,ACC
GO:0006261	DNA-dependent DNA replication	0.197079	-1.62415	5	1	0.010101	33571	tim
GO:0009589	detection of UV	0.197079	-1.62415	5	1	0.010101	34012	ninaC
GO:0071616	acyl-CoA biosynthetic process	0.197079	-1.62415	5	1	0.010101	36760	ATPCL
GO:0071897	DNA biosynthetic process	0.197079	-1.62415	5	1	0.010101	42994	Smg6
GO:2000253	positive regulation of feeding behavior	0.197079	-1.62415	5	1	0.010101	40575	5-HT2A
GO:0034311	diol metabolic process	0.197079	-1.62415	5	1	0.010101	31782	CG12116
GO:0014866	skeletal myofibril assembly	0.197079	-1.62415	5	1	0.010101	32314	up
GO:0032365	intracellular lipid transport	0.197079	-1.62415	5	1	0.010101	32992	Pmp70
GO:0043470	regulation of carbohydrate catabolic process	0.197079	-1.62415	5	1	0.010101	39150	Ilp2
GO:0051283	negative regulation of sequestering of calcium ion	0.197079	-1.62415	5	1	0.010101	43542	trp
GO:0032981	mitochondrial respiratory chain complex I assembly	0.197079	-1.62415	5	1	0.010101	37466	ND-B12
GO:0000184	nuclear-transcribed mRNA catabolic process, nonsense-mediated decay	0.197079	-1.62415	5	1	0.010101	42994	Smg6
GO:2000370	positive regulation of clathrin-dependent endocytosis	0.197079	-1.62415	5	1	0.010101	48311	Pkc53E
GO:0001707	mesoderm formation	0.197079	-1.62415	5	1	0.010101	38006	gol
GO:0006729	tetrahydrobiopterin biosynthetic process	0.197079	-1.62415	5	1	0.010101	31782	CG12116
GO:0006094	gluconeogenesis	0.197079	-1.62415	5	1	0.010101	35886	Pgi
GO:0034312	diol biosynthetic process	0.197079	-1.62415	5	1	0.010101	31782	CG12116
GO:0046146	tetrahydrobiopterin metabolic process	0.197079	-1.62415	5	1	0.010101	31782	CG12116
GO:0006414	translational elongation	0.197079	-1.62415	5	1	0.010101	34363	eEF1delta
GO:0050918	positive chemotaxis	0.197079	-1.62415	5	1	0.010101	32400	NetB
GO:1902476	chloride transmembrane transport	0.197079	-1.62415	5	1	0.010101	41428	ClC-a
GO:2000045	regulation of G1/S transition of mitotic cell cycle	0.197079	-1.62415	5	1	0.010101	41670	B52
GO:0010257	NADH dehydrogenase complex assembly	0.197079	-1.62415	5	1	0.010101	37466	ND-B12
GO:0035384	thioester biosynthetic process	0.197079	-1.62415	5	1	0.010101	36760	ATPCL
GO:1901988	negative regulation of cell cycle phase transition	0.197079	-1.62415	5	1	0.010101	41670	B52
GO:0051156	glucose 6-phosphate metabolic process	0.197079	-1.62415	5	1	0.010101	35886	Pgi
GO:1990928	response to amino acid starvation	0.197079	-1.62415	5	1	0.010101	39150	Ilp2
GO:0004521	endoribonuclease activity	0.197079	-1.62415	5	1	0.010101	42994	Smg6
GO:0016200	synaptic target attraction	0.197079	-1.62415	5	1	0.010101	32400	NetB
GO:0019319	hexose biosynthetic process	0.197079	-1.62415	5	1	0.010101	35886	Pgi
GO:0050975	sensory perception of touch	0.197079	-1.62415	5	1	0.010101	38028	mri
GO:0051282	regulation of sequestering of calcium ion	0.197079	-1.62415	5	1	0.010101	43542	trp
GO:0001178	regulation of transcriptional start site selection at RNA polymerase II promoter	0.197079	-1.62415	5	1	0.010101	41670	B52
GO:0009996	negative regulation of cell fate specification	0.197079	-1.62415	5	1	0.010101	38846	lqf
GO:1901991	negative regulation of mitotic cell cycle phase transition	0.197079	-1.62415	5	1	0.010101	41670	B52
GO:0035039	male pronucleus assembly	0.197079	-1.62415	5	1	0.010101	43559	Nph
GO:0060025	regulation of synaptic activity	0.197079	-1.62415	5	1	0.010101	43806	Ekar
GO:0035249	synaptic transmission, glutamatergic	0.197079	-1.62415	5	1	0.010101	43806	Ekar
GO:0098656	anion transmembrane transport	0.198856	-1.61517	36	3	0.030303	414283199032992	ClC-a,CG1628,Pmp70
GO:0005975	carbohydrate metabolic process	0.209215	-1.56439	74	5	0.0505051	3.58864e+24	Pgi,Pfk,ACC,Pglym78,Treh
GO:0007608	sensory perception of smell	0.210772	-1.55698	20	2	0.020202	3899335078	Arr2,Arr1
GO:0006402	mRNA catabolic process	0.210772	-1.55698	20	2	0.020202	4133942994	cu,Smg6
GO:0042255	ribosome assembly	0.210772	-1.55698	20	2	0.020202	4532941372	RpL12,RpL24-like
GO:0006913	nucleocytoplasmic transport	0.210772	-1.55698	20	2	0.020202	4063333571	Hph,tim
GO:0051169	nuclear transport	0.210772	-1.55698	20	2	0.020202	3357140633	tim,Hph
GO:0042273	ribosomal large subunit biogenesis	0.210772	-1.55698	20	2	0.020202	4137245329	RpL24-like,RpL12
GO:0070925	organelle assembly	0.22036	-1.51249	95	6	0.0606061	4.35594e+29	Nph,Zasp52,up,RpL24-like,RpL12,Mlp60A
GO:0008039	synaptic target recognition	0.226834	-1.48354	21	2	0.020202	3240035949	NetB,hig
GO:0009065	glutamine family amino acid catabolic process	0.231609	-1.4627	6	1	0.010101	38484	Gad1
GO:0034033	purine nucleoside bisphosphate biosynthetic process	0.231609	-1.4627	6	1	0.010101	36760	ATPCL
GO:0006497	protein lipidation	0.231609	-1.4627	6	1	0.010101	39399	app
GO:0019432	triglyceride biosynthetic process	0.231609	-1.4627	6	1	0.010101	35761	ACC
GO:0031570	DNA integrity checkpoint	0.231609	-1.4627	6	1	0.010101	33571	tim
GO:0046822	regulation of nucleocytoplasmic transport	0.231609	-1.4627	6	1	0.010101	33571	tim
GO:0032881	regulation of polysaccharide metabolic process	0.231609	-1.4627	6	1	0.010101	39150	Ilp2
GO:0090257	regulation of muscle system process	0.231609	-1.4627	6	1	0.010101	32314	up
GO:0034030	ribonucleoside bisphosphate biosynthetic process	0.231609	-1.4627	6	1	0.010101	36760	ATPCL
GO:0006260	DNA replication	0.231609	-1.4627	6	1	0.010101	33571	tim
GO:0046364	monosaccharide biosynthetic process	0.231609	-1.4627	6	1	0.010101	35886	Pgi
GO:0006855	drug transmembrane transport	0.231609	-1.4627	6	1	0.010101	31990	CG1628
GO:0048332	mesoderm morphogenesis	0.231609	-1.4627	6	1	0.010101	38006	gol
GO:1902806	regulation of cell cycle G1/S phase transition	0.231609	-1.4627	6	1	0.010101	41670	B52
GO:0071684	organism emergence from protective structure	0.231609	-1.4627	6	1	0.010101	33571	tim
GO:0050766	positive regulation of phagocytosis	0.231609	-1.4627	6	1	0.010101	33571	tim
GO:0000289	nuclear-transcribed mRNA poly(A) tail shortening	0.231609	-1.4627	6	1	0.010101	41339	cu
GO:0090502	RNA phosphodiester bond hydrolysis, endonucleolytic	0.231609	-1.4627	6	1	0.010101	42994	Smg6
GO:0006937	regulation of muscle contraction	0.231609	-1.4627	6	1	0.010101	32314	up
GO:0048018	receptor ligand activity	0.231609	-1.4627	6	1	0.010101	39150	Ilp2
GO:0042158	lipoprotein biosynthetic process	0.231609	-1.4627	6	1	0.010101	39399	app
GO:0001704	formation of primary germ layer	0.231609	-1.4627	6	1	0.010101	38006	gol
GO:0010948	negative regulation of cell cycle process	0.231609	-1.4627	6	1	0.010101	41670	B52
GO:0070873	regulation of glycogen metabolic process	0.231609	-1.4627	6	1	0.010101	39150	Ilp2
GO:0043487	regulation of RNA stability	0.231609	-1.4627	6	1	0.010101	42994	Smg6
GO:0009712	catechol-containing compound metabolic process	0.231609	-1.4627	6	1	0.010101	31863	t
GO:0010454	negative regulation of cell fate commitment	0.231609	-1.4627	6	1	0.010101	38846	lqf
GO:0006584	catecholamine metabolic process	0.231609	-1.4627	6	1	0.010101	31863	t
GO:0042417	dopamine metabolic process	0.231609	-1.4627	6	1	0.010101	31863	t
GO:0033866	nucleoside bisphosphate biosynthetic process	0.231609	-1.4627	6	1	0.010101	36760	ATPCL
GO:0031032	actomyosin structure organization	0.233023	-1.45662	39	3	0.030303	378533674032314	Mlp60A,Zasp52,up
GO:0006520	cellular amino acid metabolic process	0.233023	-1.45662	39	3	0.030303	406333455438484	Hph,CG6287,Gad1
GO:0009259	ribonucleotide metabolic process	0.236058	-1.44368	58	4	0.040404	3.67604e+19	ATPCL,Pgi,Pfk,Pglym78
GO:0009150	purine ribonucleotide metabolic process	0.236058	-1.44368	58	4	0.040404	3.67604e+19	ATPCL,Pfk,Pglym78,Pgi
GO:0016491	oxidoreductase activity	0.242983	-1.41476	22	2	0.020202	3241933421	CG9512,CG3609
GO:0008355	olfactory learning	0.242983	-1.41476	22	2	0.020202	3848443542	Gad1,trp
GO:0042749	regulation of circadian sleep/wake cycle	0.242983	-1.41476	22	2	0.020202	3357132378	tim,Fbxl4
GO:0006401	RNA catabolic process	0.242983	-1.41476	22	2	0.020202	4133942994	cu,Smg6
GO:0046394	carboxylic acid biosynthetic process	0.24465	-1.40793	40	3	0.030303	384843576136760	Gad1,ACC,ATPCL
GO:0016053	organic acid biosynthetic process	0.24465	-1.40793	40	3	0.030303	367603576138484	ATPCL,ACC,Gad1
GO:0042391	regulation of membrane potential	0.24465	-1.40793	40	3	0.030303	4.38063e+16	Ekar,Slob,inaF-B
GO:0019693	ribose phosphate metabolic process	0.255056	-1.36627	60	4	0.040404	4.34474e+19	Pglym78,Pfk,Pgi,ATPCL
GO:0006163	purine nucleotide metabolic process	0.255056	-1.36627	60	4	0.040404	3.67604e+19	ATPCL,Pgi,Pfk,Pglym78
GO:0007520	myoblast fusion	0.259183	-1.35022	23	2	0.020202	4344736060	Pglym78,Pfk
GO:0008593	regulation of Notch signaling pathway	0.259183	-1.35022	23	2	0.020202	3884641062	lqf,pyd
GO:0140253	cell-cell fusion	0.259183	-1.35022	23	2	0.020202	3606043447	Pfk,Pglym78
GO:0051346	negative regulation of hydrolase activity	0.259183	-1.35022	23	2	0.020202	340383355133	Slob,conu
GO:0030833	regulation of actin filament polymerization	0.259183	-1.35022	23	2	0.020202	335513331224	conu,PsGEF
GO:0000768	syncytium formation by plasma membrane fusion	0.259183	-1.35022	23	2	0.020202	3606043447	Pfk,Pglym78
GO:0006949	syncytium formation	0.259183	-1.35022	23	2	0.020202	3606043447	Pfk,Pglym78
GO:0042052	rhabdomere development	0.259183	-1.35022	23	2	0.020202	4369041474	chp,Cpn
GO:0042745	circadian sleep/wake cycle	0.264669	-1.32927	7	1	0.010101	37921	ITP
GO:0043271	negative regulation of ion transport	0.264669	-1.32927	7	1	0.010101	34038	Slob
GO:2000369	regulation of clathrin-dependent endocytosis	0.264669	-1.32927	7	1	0.010101	48311	Pkc53E
GO:0060260	regulation of transcription initiation from RNA polymerase II promoter	0.264669	-1.32927	7	1	0.010101	41670	B52
GO:0046839	phospholipid dephosphorylation	0.264669	-1.32927	7	1	0.010101	40468	laza
GO:0033157	regulation of intracellular protein transport	0.264669	-1.32927	7	1	0.010101	33571	tim
GO:0031440	regulation of mRNA 3'-end processing	0.264669	-1.32927	7	1	0.010101	41670	B52
GO:0008347	glial cell migration	0.264669	-1.32927	7	1	0.010101	32400	NetB
GO:0046463	acylglycerol biosynthetic process	0.264669	-1.32927	7	1	0.010101	35761	ACC
GO:0007394	dorsal closure, elongation of leading edge cells	0.264669	-1.32927	7	1	0.010101	41118	FER
GO:0045292	mRNA cis splicing, via spliceosome	0.264669	-1.32927	7	1	0.010101	41670	B52
GO:0003013	circulatory system process	0.264669	-1.32927	7	1	0.010101	32314	up
GO:0002027	regulation of heart rate	0.264669	-1.32927	7	1	0.010101	33571	tim
GO:0051052	regulation of DNA metabolic process	0.264669	-1.32927	7	1	0.010101	42994	Smg6
GO:0034644	cellular response to UV	0.264669	-1.32927	7	1	0.010101	34012	ninaC
GO:0051101	regulation of DNA binding	0.264669	-1.32927	7	1	0.010101	33571	tim
GO:0009648	photoperiodism	0.264669	-1.32927	7	1	0.010101	33571	tim
GO:0005984	disaccharide metabolic process	0.264669	-1.32927	7	1	0.010101	45368	Treh
GO:0046460	neutral lipid biosynthetic process	0.264669	-1.32927	7	1	0.010101	35761	ACC
GO:0048678	response to axon injury	0.264669	-1.32927	7	1	0.010101	40627	rtp
GO:0035147	branch fusion, open tracheal system	0.264669	-1.32927	7	1	0.010101	41062	pyd
GO:0006576	cellular biogenic amine metabolic process	0.264669	-1.32927	7	1	0.010101	31863	t
GO:0097190	apoptotic signaling pathway	0.264669	-1.32927	7	1	0.010101	33271	ninaA
GO:0007093	mitotic cell cycle checkpoint	0.264669	-1.32927	7	1	0.010101	41670	B52
GO:0045752	positive regulation of Toll signaling pathway	0.264669	-1.32927	7	1	0.010101	40292	Pitslre
GO:0035146	tube fusion	0.264669	-1.32927	7	1	0.010101	41062	pyd
GO:0044106	cellular amine metabolic process	0.264669	-1.32927	7	1	0.010101	31863	t
GO:0003015	heart process	0.264669	-1.32927	7	1	0.010101	32314	up
GO:2000142	regulation of DNA-templated transcription, initiation	0.264669	-1.32927	7	1	0.010101	41670	B52
GO:0042559	pteridine-containing compound biosynthetic process	0.264669	-1.32927	7	1	0.010101	31782	CG12116
GO:0009308	amine metabolic process	0.264669	-1.32927	7	1	0.010101	31863	t
GO:0006458	'de novo' protein folding	0.264669	-1.32927	7	1	0.010101	33271	ninaA
GO:0006820	anion transport	0.264675	-1.32925	61	4	0.040404	4.14282e+20	ClC-a,CG30392,CG1628,Pmp70
GO:0007626	locomotory behavior	0.265824	-1.32492	81	5	0.0505051	3.35714e+24	tim,cu,Gad1,Ilp2,ITP
GO:0030537	larval behavior	0.2754	-1.28953	24	2	0.020202	3848439150	Gad1,Ilp2
GO:0006816	calcium ion transport	0.2754	-1.28953	24	2	0.020202	4354236003	trp,trpl
GO:0030832	regulation of actin filament length	0.2754	-1.28953	24	2	0.020202	335513331224	conu,PsGEF
GO:0008064	regulation of actin polymerization or depolymerization	0.2754	-1.28953	24	2	0.020202	335513331224	conu,PsGEF
GO:0051051	negative regulation of transport	0.2754	-1.28953	24	2	0.020202	4106234038	pyd,Slob
GO:0046148	pigment biosynthetic process	0.2754	-1.28953	24	2	0.020202	4261433271	rdhB,ninaA
GO:0008284	positive regulation of cell population proliferation	0.2754	-1.28953	24	2	0.020202	391503355133	Ilp2,conu
GO:0022604	regulation of cell morphogenesis	0.284115	-1.25838	63	4	0.040404	4.11184e+19	FER,pyd,NetB,babos
GO:1903825	organic acid transmembrane transport	0.291604	-1.23236	25	2	0.020202	3299231990	Pmp70,CG1628
GO:1905039	carboxylic acid transmembrane transport	0.291604	-1.23236	25	2	0.020202	3299231990	Pmp70,CG1628
GO:0014902	myotube differentiation	0.291604	-1.23236	25	2	0.020202	3606043447	Pfk,Pglym78
GO:0072521	purine-containing compound metabolic process	0.29392	-1.22445	64	4	0.040404	3.60604e+19	Pfk,Pglym78,Pgi,ATPCL
GO:0030536	larval feeding behavior	0.29632	-1.21631	8	1	0.010101	39150	Ilp2
GO:0042558	pteridine-containing compound metabolic process	0.29632	-1.21631	8	1	0.010101	31782	CG12116
GO:0016791	phosphatase activity	0.29632	-1.21631	8	1	0.010101	40468	laza
GO:0000288	nuclear-transcribed mRNA catabolic process, deadenylation-dependent decay	0.29632	-1.21631	8	1	0.010101	41339	cu
GO:0015807	L-amino acid transport	0.29632	-1.21631	8	1	0.010101	31990	CG1628
GO:0050764	regulation of phagocytosis	0.29632	-1.21631	8	1	0.010101	33571	tim
GO:0009311	oligosaccharide metabolic process	0.29632	-1.21631	8	1	0.010101	45368	Treh
GO:2000736	regulation of stem cell differentiation	0.29632	-1.21631	8	1	0.010101	38846	lqf
GO:0010906	regulation of glucose metabolic process	0.29632	-1.21631	8	1	0.010101	39150	Ilp2
GO:0045455	ecdysteroid metabolic process	0.29632	-1.21631	8	1	0.010101	32419	CG9512
GO:0016999	antibiotic metabolic process	0.29632	-1.21631	8	1	0.010101	36760	ATPCL
GO:1902475	L-alpha-amino acid transmembrane transport	0.29632	-1.21631	8	1	0.010101	31990	CG1628
GO:0006536	glutamate metabolic process	0.29632	-1.21631	8	1	0.010101	38484	Gad1
GO:0006606	protein import into nucleus	0.29632	-1.21631	8	1	0.010101	33571	tim
GO:0010160	formation of animal organ boundary	0.29632	-1.21631	8	1	0.010101	32400	NetB
GO:0042157	lipoprotein metabolic process	0.29632	-1.21631	8	1	0.010101	39399	app
GO:0110053	regulation of actin filament organization	0.307765	-1.17842	26	2	0.020202	312243355133	PsGEF,conu
GO:0060446	branching involved in open tracheal system development	0.307765	-1.17842	26	2	0.020202	4106240633	pyd,Hph
GO:0006732	coenzyme metabolic process	0.307765	-1.17842	26	2	0.020202	3676031782	ATPCL,CG12116
GO:0008360	regulation of cell shape	0.307765	-1.17842	26	2	0.020202	4111841062	FER,pyd
GO:0048754	branching morphogenesis of an epithelial tube	0.307765	-1.17842	26	2	0.020202	4063341062	Hph,pyd
GO:0001763	morphogenesis of a branching structure	0.307765	-1.17842	26	2	0.020202	4106240633	pyd,Hph
GO:0061138	morphogenesis of a branching epithelium	0.307765	-1.17842	26	2	0.020202	4063341062	Hph,pyd
GO:0032271	regulation of protein polymerization	0.307765	-1.17842	26	2	0.020202	312243355133	PsGEF,conu
GO:0000381	regulation of alternative mRNA splicing, via spliceosome	0.307765	-1.17842	26	2	0.020202	735439941670	CG17454,B52
GO:0019637	organophosphate metabolic process	0.309277	-1.17352	107	6	0.0606061	4.04683e+29	laza,CG14945,ATPCL,Pgi,Pfk,Pglym78
GO:0009117	nucleotide metabolic process	0.313662	-1.15944	66	4	0.040404	3.67604e+19	ATPCL,Pglym78,Pfk,Pgi
GO:0006753	nucleoside phosphate metabolic process	0.313662	-1.15944	66	4	0.040404	4.34474e+19	Pglym78,Pfk,Pgi,ATPCL
GO:0051188	cofactor biosynthetic process	0.323857	-1.12745	27	2	0.020202	3676031782	ATPCL,CG12116
GO:0008306	associative learning	0.323857	-1.12745	27	2	0.020202	4354238484	trp,Gad1
GO:0034655	nucleobase-containing compound catabolic process	0.323857	-1.12745	27	2	0.020202	4299441339	Smg6,cu
GO:0045930	negative regulation of mitotic cell cycle	0.326622	-1.11895	9	1	0.010101	41670	B52
GO:0071456	cellular response to hypoxia	0.326622	-1.11895	9	1	0.010101	40633	Hph
GO:0007338	single fertilization	0.326622	-1.11895	9	1	0.010101	43559	Nph
GO:0090501	RNA phosphodiester bond hydrolysis	0.326622	-1.11895	9	1	0.010101	42994	Smg6
GO:0009649	entrainment of circadian clock	0.326622	-1.11895	9	1	0.010101	33571	tim
GO:0007204	positive regulation of cytosolic calcium ion concentration	0.326622	-1.11895	9	1	0.010101	43541	Capa
GO:0010004	gastrulation involving germ band extension	0.326622	-1.11895	9	1	0.010101	40575	5-HT2A
GO:0001703	gastrulation with mouth forming first	0.326622	-1.11895	9	1	0.010101	40575	5-HT2A
GO:0001737	establishment of imaginal disc-derived wing hair orientation	0.326622	-1.11895	9	1	0.010101	39399	app
GO:0006611	protein export from nucleus	0.326622	-1.11895	9	1	0.010101	40633	Hph
GO:0042659	regulation of cell fate specification	0.326622	-1.11895	9	1	0.010101	38846	lqf
GO:0007392	initiation of dorsal closure	0.326622	-1.11895	9	1	0.010101	41118	FER
GO:0051170	import into nucleus	0.326622	-1.11895	9	1	0.010101	33571	tim
GO:0004930	G protein-coupled receptor activity	0.326622	-1.11895	9	1	0.010101	40575	5-HT2A
GO:0042180	cellular ketone metabolic process	0.326622	-1.11895	9	1	0.010101	32419	CG9512
GO:0098661	inorganic anion transmembrane transport	0.326622	-1.11895	9	1	0.010101	41428	ClC-a
GO:0009566	fertilization	0.326622	-1.11895	9	1	0.010101	43559	Nph
GO:0042026	protein refolding	0.326622	-1.11895	9	1	0.010101	33271	ninaA
GO:0017156	calcium-ion regulated exocytosis	0.326622	-1.11895	9	1	0.010101	42015	Scp2
GO:0034504	protein localization to nucleus	0.326622	-1.11895	9	1	0.010101	33571	tim
GO:0048645	animal organ formation	0.326622	-1.11895	9	1	0.010101	32400	NetB
GO:0015711	organic anion transport	0.327874	-1.11512	47	3	0.030303	2465873199032990	CG30392,CG1628,Pmp70
GO:0016071	mRNA metabolic process	0.333531	-1.09802	68	4	0.040404	7.3544e+21	CG17454,cu,Smg6,B52
GO:0006897	endocytosis	0.333531	-1.09802	68	4	0.040404	3.88464e+19	lqf,Arr2,Tsp42Ej,Arr1
GO:0007498	mesoderm development	0.339858	-1.07923	28	2	0.020202	3800632314	gol,up
GO:0030431	sleep	0.339858	-1.07923	28	2	0.020202	3915033571	Ilp2,tim
GO:0006811	ion transport	0.341028	-1.07579	176	9	0.0909091	3.19904e+45	CG1628,Rh50,trpl,Pmp70,trp,Capa,CG30392,ClC-a,Ekar
GO:0061061	muscle structure development	0.351598	-1.04527	91	5	0.0505051	3.78534e+24	Mlp60A,Pglym78,Pfk,up,Zasp52
GO:0016311	dephosphorylation	0.351849	-1.04455	49	3	0.030303	425764011840468	CG6656,CG9451,laza
GO:0006821	chloride transport	0.355632	-1.03386	10	1	0.010101	41428	ClC-a
GO:0007632	visual behavior	0.355632	-1.03386	10	1	0.010101	43806	Ekar
GO:0006612	protein targeting to membrane	0.355632	-1.03386	10	1	0.010101	39399	app
GO:0044272	sulfur compound biosynthetic process	0.355632	-1.03386	10	1	0.010101	36760	ATPCL
GO:0015718	monocarboxylic acid transport	0.355632	-1.03386	10	1	0.010101	32992	Pmp70
GO:0046664	dorsal closure, amnioserosa morphology change	0.355632	-1.03386	10	1	0.010101	41118	FER
GO:0001708	cell fate specification	0.355632	-1.03386	10	1	0.010101	41062	pyd
GO:0043543	protein acylation	0.355632	-1.03386	10	1	0.010101	39399	app
GO:0048859	formation of anatomical boundary	0.355632	-1.03386	10	1	0.010101	32400	NetB
GO:0046622	positive regulation of organ growth	0.355632	-1.03386	10	1	0.010101	39150	Ilp2
GO:0008202	steroid metabolic process	0.355632	-1.03386	10	1	0.010101	32419	CG9512
GO:0010675	regulation of cellular carbohydrate metabolic process	0.355632	-1.03386	10	1	0.010101	39150	Ilp2
GO:0046662	regulation of oviposition	0.355632	-1.03386	10	1	0.010101	36236	Drip
GO:0046173	polyol biosynthetic process	0.355632	-1.03386	10	1	0.010101	31782	CG12116
GO:0007274	neuromuscular synaptic transmission	0.355745	-1.03354	29	2	0.020202	4299434038	Smg6,Slob
GO:0072511	divalent inorganic cation transport	0.355745	-1.03354	29	2	0.020202	4354236003	trp,trpl
GO:0070838	divalent metal ion transport	0.355745	-1.03354	29	2	0.020202	3600343542	trpl,trp
GO:0006869	lipid transport	0.355745	-1.03354	29	2	0.020202	32992246587	Pmp70,CG30392
GO:0099177	regulation of trans-synaptic signaling	0.36345	-1.01211	71	4	0.040404	4.38063e+19	Ekar,Slob,Fbxl4,Cbp53E
GO:0050804	modulation of chemical synaptic transmission	0.36345	-1.01211	71	4	0.040404	3.23784e+19	Fbxl4,Cbp53E,Slob,Ekar
GO:0050877	nervous system process	0.366332	-1.00421	158	8	0.0808081	3.60034e+39	trpl,Arr1,mri,t,Arr2,Gad1,trp,inaD
GO:0001558	regulation of cell growth	0.371499	-0.990209	30	2	0.020202	4063339150	Hph,Ilp2
GO:0048024	regulation of mRNA splicing, via spliceosome	0.371499	-0.990209	30	2	0.020202	735439941670	CG17454,B52
GO:0006637	acyl-CoA metabolic process	0.383404	-0.958665	11	1	0.010101	36760	ATPCL
GO:0043052	thermotaxis	0.383404	-0.958665	11	1	0.010101	40468	laza
GO:1902667	regulation of axon guidance	0.383404	-0.958665	11	1	0.010101	32400	NetB
GO:0045746	negative regulation of Notch signaling pathway	0.383404	-0.958665	11	1	0.010101	41062	pyd
GO:0034333	adherens junction assembly	0.383404	-0.958665	11	1	0.010101	41062	pyd
GO:0009064	glutamine family amino acid metabolic process	0.383404	-0.958665	11	1	0.010101	38484	Gad1
GO:0090305	nucleic acid phosphodiester bond hydrolysis	0.383404	-0.958665	11	1	0.010101	42994	Smg6
GO:0051168	nuclear export	0.383404	-0.958665	11	1	0.010101	40633	Hph
GO:0035383	thioester metabolic process	0.383404	-0.958665	11	1	0.010101	36760	ATPCL
GO:0048260	positive regulation of receptor-mediated endocytosis	0.383404	-0.958665	11	1	0.010101	48311	Pkc53E
GO:0035195	gene silencing by miRNA	0.383404	-0.958665	11	1	0.010101	42994	Smg6
GO:0042626	ATPase-coupled transmembrane transporter activity	0.383404	-0.958665	11	1	0.010101	32992	Pmp70
GO:0006936	muscle contraction	0.383404	-0.958665	11	1	0.010101	32314	up
GO:0016579	protein deubiquitination	0.383404	-0.958665	11	1	0.010101	42509	Usp8
GO:0034754	cellular hormone metabolic process	0.383404	-0.958665	11	1	0.010101	32419	CG9512
GO:0050920	regulation of chemotaxis	0.383404	-0.958665	11	1	0.010101	32400	NetB
GO:0070328	triglyceride homeostasis	0.383404	-0.958665	11	1	0.010101	39150	Ilp2
GO:0015171	amino acid transmembrane transporter activity	0.383404	-0.958665	11	1	0.010101	31990	CG1628
GO:0008589	regulation of smoothened signaling pathway	0.387102	-0.949067	31	2	0.020202	4014842509	Gbeta76C,Usp8
GO:0046942	carboxylic acid transport	0.387102	-0.949067	31	2	0.020202	3199032992	CG1628,Pmp70
GO:0015849	organic acid transport	0.387102	-0.949067	31	2	0.020202	3299231990	Pmp70,CG1628
GO:0019439	aromatic compound catabolic process	0.387102	-0.949067	31	2	0.020202	4299441339	Smg6,cu
GO:0097435	supramolecular fiber organization	0.393347	-0.933062	74	4	0.040404	3.78534e+19	Mlp60A,FER,up,Zasp52
GO:0044270	cellular nitrogen compound catabolic process	0.402538	-0.909967	32	2	0.020202	4133942994	cu,Smg6
GO:0031146	SCF-dependent proteasomal ubiquitin-dependent protein catabolic process	0.409991	-0.89162	12	1	0.010101	32378	Fbxl4
GO:0015914	phospholipid transport	0.409991	-0.89162	12	1	0.010101	246587	CG30392
GO:0043462	regulation of ATPase activity	0.409991	-0.89162	12	1	0.010101	34038	Slob
GO:0006641	triglyceride metabolic process	0.409991	-0.89162	12	1	0.010101	35761	ACC
GO:0044275	cellular carbohydrate catabolic process	0.409991	-0.89162	12	1	0.010101	45368	Treh
GO:0008286	insulin receptor signaling pathway	0.409991	-0.89162	12	1	0.010101	39150	Ilp2
GO:0055090	acylglycerol homeostasis	0.409991	-0.89162	12	1	0.010101	39150	Ilp2
GO:0009453	energy taxis	0.409991	-0.89162	12	1	0.010101	33571	tim
GO:0060180	female mating behavior	0.409991	-0.89162	12	1	0.010101	39150	Ilp2
GO:0042331	phototaxis	0.409991	-0.89162	12	1	0.010101	33571	tim
GO:0034032	purine nucleoside bisphosphate metabolic process	0.409991	-0.89162	12	1	0.010101	36760	ATPCL
GO:0035023	regulation of Rho protein signal transduction	0.409991	-0.89162	12	1	0.010101	31224	PsGEF
GO:0006109	regulation of carbohydrate metabolic process	0.409991	-0.89162	12	1	0.010101	39150	Ilp2
GO:0033875	ribonucleoside bisphosphate metabolic process	0.409991	-0.89162	12	1	0.010101	36760	ATPCL
GO:0033227	dsRNA transport	0.409991	-0.89162	12	1	0.010101	34012	ninaC
GO:0009826	unidimensional cell growth	0.409991	-0.89162	12	1	0.010101	41118	FER
GO:0010453	regulation of cell fate commitment	0.409991	-0.89162	12	1	0.010101	38846	lqf
GO:0033865	nucleoside bisphosphate metabolic process	0.409991	-0.89162	12	1	0.010101	36760	ATPCL
GO:0055085	transmembrane transport	0.410766	-0.889731	187	9	0.0909091	4.35424e+44	trp,ClC-a,Drip,CG7272,CG5687,CG1628,Rh50,trpl,Pmp70
GO:0010927	cellular component assembly involved in morphogenesis	0.411241	-0.888577	54	3	0.030303	367403231437853	Zasp52,up,Mlp60A
GO:0046034	ATP metabolic process	0.413185	-0.883859	76	4	0.040404	4.34474e+19	Pglym78,Pfk,Pgi,ND-B12
GO:0006631	fatty acid metabolic process	0.417792	-0.872772	33	2	0.020202	3676035761	ATPCL,ACC
GO:0007525	somatic muscle development	0.417792	-0.872772	33	2	0.020202	3606043447	Pfk,Pglym78
GO:0043086	negative regulation of catalytic activity	0.417792	-0.872772	33	2	0.020202	340383355133	Slob,conu
GO:0044057	regulation of system process	0.417792	-0.872772	33	2	0.020202	3357132314	tim,up
GO:1901605	alpha-amino acid metabolic process	0.417792	-0.872772	33	2	0.020202	3848440633	Gad1,Hph
GO:0006259	DNA metabolic process	0.417792	-0.872772	33	2	0.020202	4299433571	Smg6,tim
GO:0006091	generation of precursor metabolites and energy	0.421481	-0.863981	99	5	0.0505051	3.74664e+24	ND-B12,Pgi,Pfk,Pglym78,ACC
GO:0043484	regulation of RNA splicing	0.432852	-0.83736	34	2	0.020202	735439941670	CG17454,B52
GO:0030100	regulation of endocytosis	0.432852	-0.83736	34	2	0.020202	4106248311	pyd,Pkc53E
GO:0022618	ribonucleoprotein complex assembly	0.432852	-0.83736	34	2	0.020202	4532941372	RpL12,RpL24-like
GO:0046700	heterocycle catabolic process	0.432852	-0.83736	34	2	0.020202	4133942994	cu,Smg6
GO:0042048	olfactory behavior	0.432852	-0.83736	34	2	0.020202	3848443542	Gad1,trp
GO:0050684	regulation of mRNA processing	0.432852	-0.83736	34	2	0.020202	735439941670	CG17454,B52
GO:0055086	nucleobase-containing small molecule metabolic process	0.432896	-0.837259	78	4	0.040404	3.67604e+19	ATPCL,Pfk,Pglym78,Pgi
GO:0042127	regulation of cell population proliferation	0.432896	-0.837259	78	4	0.040404	4.83113e+21	Pkc53E,conu,FER,Ilp2
GO:0015893	drug transport	0.435442	-0.831393	13	1	0.010101	31990	CG1628
GO:0051260	protein homooligomerization	0.435442	-0.831393	13	1	0.010101	36060	Pfk
GO:0043467	regulation of generation of precursor metabolites and energy	0.435442	-0.831393	13	1	0.010101	39150	Ilp2
GO:0070646	protein modification by small protein removal	0.435442	-0.831393	13	1	0.010101	42509	Usp8
GO:0060537	muscle tissue development	0.435442	-0.831393	13	1	0.010101	37853	Mlp60A
GO:1901990	regulation of mitotic cell cycle phase transition	0.435442	-0.831393	13	1	0.010101	41670	B52
GO:0043648	dicarboxylic acid metabolic process	0.435442	-0.831393	13	1	0.010101	38484	Gad1
GO:0051607	defense response to virus	0.435442	-0.831393	13	1	0.010101	41670	B52
GO:0072583	clathrin-dependent endocytosis	0.435442	-0.831393	13	1	0.010101	38846	lqf
GO:0016246	RNA interference	0.435442	-0.831393	13	1	0.010101	42994	Smg6
GO:0046165	alcohol biosynthetic process	0.435442	-0.831393	13	1	0.010101	31782	CG12116
GO:0009411	response to UV	0.435442	-0.831393	13	1	0.010101	34012	ninaC
GO:0008592	regulation of Toll signaling pathway	0.435442	-0.831393	13	1	0.010101	40292	Pitslre
GO:0006644	phospholipid metabolic process	0.447706	-0.803618	35	2	0.020202	4046834623	laza,CG14945
GO:0044262	cellular carbohydrate metabolic process	0.447706	-0.803618	35	2	0.020202	3576145368	ACC,Treh
GO:0098609	cell-cell adhesion	0.447706	-0.803618	35	2	0.020202	4369041062	chp,pyd
GO:0098657	import into cell	0.452436	-0.793109	80	4	0.040404	3.88464e+19	lqf,Arr2,Arr1,Tsp42Ej
GO:0017144	drug metabolic process	0.457591	-0.781781	58	3	0.030303	367603178231863	ATPCL,CG12116,t
GO:0003012	muscle system process	0.459806	-0.77695	14	1	0.010101	32314	up
GO:0062012	regulation of small molecule metabolic process	0.459806	-0.77695	14	1	0.010101	39150	Ilp2
GO:1901987	regulation of cell cycle phase transition	0.459806	-0.77695	14	1	0.010101	41670	B52
GO:0045880	positive regulation of smoothened signaling pathway	0.459806	-0.77695	14	1	0.010101	42509	Usp8
GO:0007430	terminal branching, open tracheal system	0.459806	-0.77695	14	1	0.010101	40633	Hph
GO:0032386	regulation of intracellular transport	0.459806	-0.77695	14	1	0.010101	33571	tim
GO:0045727	positive regulation of translation	0.459806	-0.77695	14	1	0.010101	39108	RpS9
GO:0070050	neuron cellular homeostasis	0.459806	-0.77695	14	1	0.010101	36905	Cbp53E
GO:0048259	regulation of receptor-mediated endocytosis	0.459806	-0.77695	14	1	0.010101	48311	Pkc53E
GO:0040018	positive regulation of multicellular organism growth	0.459806	-0.77695	14	1	0.010101	39150	Ilp2
GO:0015698	inorganic anion transport	0.459806	-0.77695	14	1	0.010101	41428	ClC-a
GO:1901361	organic cyclic compound catabolic process	0.462344	-0.771445	36	2	0.020202	4299441339	Smg6,cu
GO:0007612	learning	0.462344	-0.771445	36	2	0.020202	4354238484	trp,Gad1
GO:0071826	ribonucleoprotein complex subunit organization	0.462344	-0.771445	36	2	0.020202	4137245329	RpL24-like,RpL12
GO:0042752	regulation of circadian rhythm	0.462344	-0.771445	36	2	0.020202	3237833571	Fbxl4,tim
GO:0065003	protein-containing complex assembly	0.466189	-0.763163	127	6	0.0606061	3.60606e+31	Pfk,CG34242,RpL12,RpL24-like,CG17996,ND-B12
GO:1902903	regulation of supramolecular fiber organization	0.476758	-0.740747	37	2	0.020202	335513331224	conu,PsGEF
GO:0007635	chemosensory behavior	0.476758	-0.740747	37	2	0.020202	3848443542	Gad1,trp
GO:0043254	regulation of protein complex assembly	0.476758	-0.740747	37	2	0.020202	335513331224	conu,PsGEF
GO:0022857	transmembrane transporter activity	0.483129	-0.727471	15	1	0.010101	38255	CG5687
GO:0002702	positive regulation of production of molecular mediator of immune response	0.483129	-0.727471	15	1	0.010101	40292	Pitslre
GO:0002699	positive regulation of immune effector process	0.483129	-0.727471	15	1	0.010101	40292	Pitslre
GO:0120034	positive regulation of plasma membrane bounded cell projection assembly	0.483129	-0.727471	15	1	0.010101	31224	PsGEF
GO:0002225	positive regulation of antimicrobial peptide production	0.483129	-0.727471	15	1	0.010101	40292	Pitslre
GO:0007631	feeding behavior	0.483129	-0.727471	15	1	0.010101	39150	Ilp2
GO:0015748	organophosphate ester transport	0.483129	-0.727471	15	1	0.010101	246587	CG30392
GO:0002922	positive regulation of humoral immune response	0.483129	-0.727471	15	1	0.010101	40292	Pitslre
GO:0002760	positive regulation of antimicrobial humoral response	0.483129	-0.727471	15	1	0.010101	40292	Pitslre
GO:0050805	negative regulation of synaptic transmission	0.483129	-0.727471	15	1	0.010101	32378	Fbxl4
GO:1901135	carbohydrate derivative metabolic process	0.490139	-0.713067	107	5	0.0505051	3.67603e+24	ATPCL,ninaA,Pgi,Pglym78,Pfk
GO:0010876	lipid localization	0.490939	-0.711436	38	2	0.020202	32992246587	Pmp70,CG30392
GO:0031344	regulation of cell projection organization	0.491358	-0.710583	61	3	0.030303	375573240031224	babos,NetB,PsGEF
GO:0120035	regulation of plasma membrane bounded cell projection organization	0.491358	-0.710583	61	3	0.030303	375573240031224	babos,NetB,PsGEF
GO:0034220	ion transmembrane transport	0.497033	-0.699098	131	6	0.0606061	3.85894e+29	Rh50,trpl,Pmp70,trp,CG1628,ClC-a
GO:0032535	regulation of cellular component size	0.502391	-0.688376	62	3	0.030303	3.12243e+16	PsGEF,conu,Ilp2
GO:0007606	sensory perception of chemical stimulus	0.50488	-0.683435	39	2	0.020202	3899335078	Arr2,Arr1
GO:0042051	compound eye photoreceptor development	0.50488	-0.683435	39	2	0.020202	4147443690	Cpn,chp
GO:0051017	actin filament bundle assembly	0.505455	-0.682297	16	1	0.010101	41118	FER
GO:0017038	protein import	0.505455	-0.682297	16	1	0.010101	33571	tim
GO:0007187	G protein-coupled receptor signaling pathway, coupled to cyclic nucleotide second messenger	0.505455	-0.682297	16	1	0.010101	40575	5-HT2A
GO:0061572	actin filament bundle organization	0.505455	-0.682297	16	1	0.010101	41118	FER
GO:0005977	glycogen metabolic process	0.505455	-0.682297	16	1	0.010101	35761	ACC
GO:0097164	ammonium ion metabolic process	0.505455	-0.682297	16	1	0.010101	31863	t
GO:1903522	regulation of blood circulation	0.505455	-0.682297	16	1	0.010101	33571	tim
GO:0006112	energy reserve metabolic process	0.505455	-0.682297	16	1	0.010101	35761	ACC
GO:0006073	cellular glucan metabolic process	0.505455	-0.682297	16	1	0.010101	35761	ACC
GO:0006638	neutral lipid metabolic process	0.505455	-0.682297	16	1	0.010101	35761	ACC
GO:0008016	regulation of heart contraction	0.505455	-0.682297	16	1	0.010101	33571	tim
GO:0046716	muscle cell cellular homeostasis	0.505455	-0.682297	16	1	0.010101	32314	up
GO:0006639	acylglycerol metabolic process	0.505455	-0.682297	16	1	0.010101	35761	ACC
GO:0044042	glucan metabolic process	0.505455	-0.682297	16	1	0.010101	35761	ACC
GO:1903034	regulation of response to wounding	0.505455	-0.682297	16	1	0.010101	36905	Cbp53E
GO:0048814	regulation of dendrite morphogenesis	0.505455	-0.682297	16	1	0.010101	37557	babos
GO:0034622	cellular protein-containing complex assembly	0.506898	-0.679445	109	5	0.0505051	3.74663e+26	ND-B12,CG17996,CG34242,RpL24-like,RpL12
GO:0098655	cation transmembrane transport	0.509665	-0.674002	86	4	0.040404	3.85894e+19	Rh50,trpl,CG1628,trp
GO:0048598	embryonic morphogenesis	0.509665	-0.674002	86	4	0.040404	4.10624e+19	pyd,gol,5-HT2A,FER
GO:0060627	regulation of vesicle-mediated transport	0.513305	-0.666885	63	3	0.030303	483113357141062	Pkc53E,tim,pyd
GO:0006812	cation transport	0.5152	-0.6632	110	5	0.0505051	4.35424e+24	trp,Capa,CG1628,Rh50,trpl
GO:0042462	eye photoreceptor cell development	0.518576	-0.656668	40	2	0.020202	4369041474	chp,Cpn
GO:1903827	regulation of cellular protein localization	0.526825	-0.640886	17	1	0.010101	33571	tim
GO:0019751	polyol metabolic process	0.526825	-0.640886	17	1	0.010101	31782	CG12116
GO:0032868	response to insulin	0.526825	-0.640886	17	1	0.010101	39150	Ilp2
GO:0009612	response to mechanical stimulus	0.526825	-0.640886	17	1	0.010101	38484	Gad1
GO:0009615	response to virus	0.526825	-0.640886	17	1	0.010101	41670	B52
GO:0007156	homophilic cell adhesion via plasma membrane adhesion molecules	0.526825	-0.640886	17	1	0.010101	43690	chp
GO:0008258	head involution	0.526825	-0.640886	17	1	0.010101	41062	pyd
GO:0032869	cellular response to insulin stimulus	0.526825	-0.640886	17	1	0.010101	39150	Ilp2
GO:0008345	larval locomotory behavior	0.526825	-0.640886	17	1	0.010101	38484	Gad1
GO:0001666	response to hypoxia	0.526825	-0.640886	17	1	0.010101	40633	Hph
GO:1901606	alpha-amino acid catabolic process	0.526825	-0.640886	17	1	0.010101	38484	Gad1
GO:0016051	carbohydrate biosynthetic process	0.526825	-0.640886	17	1	0.010101	35886	Pgi
GO:0003333	amino acid transmembrane transport	0.526825	-0.640886	17	1	0.010101	31990	CG1628
GO:0019935	cyclic-nucleotide-mediated signaling	0.526825	-0.640886	17	1	0.010101	43541	Capa
GO:0045995	regulation of embryonic development	0.532023	-0.631069	41	2	0.020202	4111841062	FER,pyd
GO:1903311	regulation of mRNA metabolic process	0.532023	-0.631069	41	2	0.020202	416707354399	B52,CG17454
GO:0007268	chemical synaptic transmission	0.539764	-0.616622	113	5	0.0505051	4.38064e+24	Ekar,lqf,5-HT2A,Slob,Smg6
GO:0098916	anterograde trans-synaptic signaling	0.539764	-0.616622	113	5	0.0505051	3.88464e+24	lqf,5-HT2A,Ekar,Slob,Smg6
GO:0044282	small molecule catabolic process	0.545215	-0.606575	42	2	0.020202	3606038484	Pfk,Gad1
GO:0051056	regulation of small GTPase mediated signal transduction	0.545215	-0.606575	42	2	0.020202	335513331224	conu,PsGEF
GO:0000377	RNA splicing, via transesterification reactions with bulged adenosine as nucleophile	0.545215	-0.606575	42	2	0.020202	735439941670	CG17454,B52
GO:0000398	mRNA splicing, via spliceosome	0.545215	-0.606575	42	2	0.020202	416707354399	B52,CG17454
GO:0000375	RNA splicing, via transesterification reactions	0.545215	-0.606575	42	2	0.020202	735439941670	CG17454,B52
GO:0071375	cellular response to peptide hormone stimulus	0.547281	-0.602792	18	1	0.010101	39150	Ilp2
GO:0002784	regulation of antimicrobial peptide production	0.547281	-0.602792	18	1	0.010101	40292	Pitslre
GO:0048520	positive regulation of behavior	0.547281	-0.602792	18	1	0.010101	40575	5-HT2A
GO:0043434	response to peptide hormone	0.547281	-0.602792	18	1	0.010101	39150	Ilp2
GO:0005976	polysaccharide metabolic process	0.547281	-0.602792	18	1	0.010101	35761	ACC
GO:1901653	cellular response to peptide	0.547281	-0.602792	18	1	0.010101	39150	Ilp2
GO:0045793	positive regulation of cell size	0.547281	-0.602792	18	1	0.010101	39150	Ilp2
GO:1901652	response to peptide	0.547281	-0.602792	18	1	0.010101	39150	Ilp2
GO:0044264	cellular polysaccharide metabolic process	0.547281	-0.602792	18	1	0.010101	35761	ACC
GO:0006865	amino acid transport	0.547281	-0.602792	18	1	0.010101	31990	CG1628
GO:0009063	cellular amino acid catabolic process	0.547281	-0.602792	18	1	0.010101	38484	Gad1
GO:0099536	synaptic signaling	0.54783	-0.60179	114	5	0.0505051	4.29944e+24	Smg6,5-HT2A,lqf,Ekar,Slob
GO:0099537	trans-synaptic signaling	0.54783	-0.60179	114	5	0.0505051	4.05754e+24	5-HT2A,Ekar,lqf,Slob,Smg6
GO:0035556	intracellular signal transduction	0.549528	-0.598695	138	6	0.0606061	4.83115e+29	Pkc53E,Eip63F-1,Capa,ninaA,TpnC25D,trpl
GO:0010769	regulation of cell morphogenesis involved in differentiation	0.558151	-0.583126	43	2	0.020202	3240037557	NetB,babos
GO:0008380	RNA splicing	0.558151	-0.583126	43	2	0.020202	416707354399	B52,CG17454
GO:0045927	positive regulation of growth	0.558151	-0.583126	43	2	0.020202	3915040633	Ilp2,Hph
GO:0032956	regulation of actin cytoskeleton organization	0.558151	-0.583126	43	2	0.020202	312243355133	PsGEF,conu
GO:0046486	glycerolipid metabolic process	0.558151	-0.583126	43	2	0.020202	3462335761	CG14945,ACC
GO:0055114	oxidation-reduction process	0.559557	-0.580609	187	8	0.0808081	3.24194e+39	CG9512,ND-B12,CG3609,CG6287,CG4842,Hph,Pfk,ACC
GO:0051057	positive regulation of small GTPase mediated signal transduction	0.566862	-0.56764	19	1	0.010101	31224	PsGEF
GO:0050832	defense response to fungus	0.566862	-0.56764	19	1	0.010101	38409	Drsl5
GO:0045879	negative regulation of smoothened signaling pathway	0.566862	-0.56764	19	1	0.010101	40148	Gbeta76C
GO:0035315	hair cell differentiation	0.566862	-0.56764	19	1	0.010101	39399	app
GO:1990542	mitochondrial transmembrane transport	0.566862	-0.56764	19	1	0.010101	31990	CG1628
GO:0002700	regulation of production of molecular mediator of immune response	0.566862	-0.56764	19	1	0.010101	40292	Pitslre
GO:0006997	nucleus organization	0.566862	-0.56764	19	1	0.010101	43559	Nph
GO:0035316	non-sensory hair organization	0.566862	-0.56764	19	1	0.010101	39399	app
GO:0046579	positive regulation of Ras protein signal transduction	0.566862	-0.56764	19	1	0.010101	31224	PsGEF
GO:0008652	cellular amino acid biosynthetic process	0.566862	-0.56764	19	1	0.010101	38484	Gad1
GO:0035317	imaginal disc-derived wing hair organization	0.566862	-0.56764	19	1	0.010101	39399	app
GO:0045017	glycerolipid biosynthetic process	0.566862	-0.56764	19	1	0.010101	35761	ACC
GO:0007015	actin filament organization	0.570827	-0.560669	44	2	0.020202	4111832314	FER,up
GO:0044265	cellular macromolecule catabolic process	0.579422	-0.545724	118	5	0.0505051	3.23784e+24	Fbxl4,Usp8,gol,Smg6,cu
GO:0042440	pigment metabolic process	0.583242	-0.539153	45	2	0.020202	3327142614	ninaA,rdhB
GO:0032970	regulation of actin filament-based process	0.583242	-0.539153	45	2	0.020202	312243355133	PsGEF,conu
GO:0051223	regulation of protein transport	0.585603	-0.535113	20	1	0.010101	33571	tim
GO:0006281	DNA repair	0.585603	-0.535113	20	1	0.010101	33571	tim
GO:0051259	protein complex oligomerization	0.585603	-0.535113	20	1	0.010101	36060	Pfk
GO:0035206	regulation of hemocyte proliferation	0.585603	-0.535113	20	1	0.010101	48311	Pkc53E
GO:0060491	regulation of cell projection assembly	0.585603	-0.535113	20	1	0.010101	31224	PsGEF
GO:0009913	epidermal cell differentiation	0.585603	-0.535113	20	1	0.010101	39399	app
GO:0040014	regulation of multicellular organism growth	0.585603	-0.535113	20	1	0.010101	39150	Ilp2
GO:0090150	establishment of protein localization to membrane	0.585603	-0.535113	20	1	0.010101	39399	app
GO:0042445	hormone metabolic process	0.585603	-0.535113	20	1	0.010101	32419	CG9512
GO:0090263	positive regulation of canonical Wnt signaling pathway	0.585603	-0.535113	20	1	0.010101	42509	Usp8
GO:0033993	response to lipid	0.585603	-0.535113	20	1	0.010101	40627	rtp
GO:0098742	cell-cell adhesion via plasma-membrane adhesion molecules	0.585603	-0.535113	20	1	0.010101	43690	chp
GO:0120032	regulation of plasma membrane bounded cell projection assembly	0.585603	-0.535113	20	1	0.010101	31224	PsGEF
GO:0007617	mating behavior	0.595395	-0.51853	46	2	0.020202	3915033571	Ilp2,tim
GO:0042254	ribosome biogenesis	0.595395	-0.51853	46	2	0.020202	4532941372	RpL12,RpL24-like
GO:0001505	regulation of neurotransmitter levels	0.595823	-0.517811	71	3	0.030303	384843884631863	Gad1,lqf,t
GO:0044255	cellular lipid metabolic process	0.59864	-0.513095	96	4	0.040404	3.57614e+19	ACC,ATPCL,laza,CG14945
GO:0030036	actin cytoskeleton organization	0.59864	-0.513095	96	4	0.040404	3.78534e+19	Mlp60A,FER,up,Zasp52
GO:0002759	regulation of antimicrobial humoral response	0.603542	-0.50494	21	1	0.010101	40292	Pitslre
GO:0034332	adherens junction organization	0.603542	-0.50494	21	1	0.010101	41062	pyd
GO:0008587	imaginal disc-derived wing margin morphogenesis	0.603542	-0.50494	21	1	0.010101	42509	Usp8
GO:0006575	cellular modified amino acid metabolic process	0.603542	-0.50494	21	1	0.010101	40633	Hph
GO:0035194	posttranscriptional gene silencing by RNA	0.603542	-0.50494	21	1	0.010101	42994	Smg6
GO:0002920	regulation of humoral immune response	0.603542	-0.50494	21	1	0.010101	40292	Pitslre
GO:0042461	photoreceptor cell development	0.607285	-0.498758	47	2	0.020202	4369041474	chp,Cpn
GO:0007618	mating	0.607285	-0.498758	47	2	0.020202	3915033571	Ilp2,tim
GO:0048646	anatomical structure formation involved in morphogenesis	0.617084	-0.482751	172	7	0.0707071	3.23144e+34	up,Zasp52,NetB,gol,Mlp60A,Pglym78,Pfk
GO:0016441	posttranscriptional gene silencing	0.620711	-0.47689	22	1	0.010101	42994	Smg6
GO:0045807	positive regulation of endocytosis	0.620711	-0.47689	22	1	0.010101	48311	Pkc53E
GO:0016322	neuron remodeling	0.620711	-0.47689	22	1	0.010101	42509	Usp8
GO:0048167	regulation of synaptic plasticity	0.620711	-0.47689	22	1	0.010101	36905	Cbp53E
GO:0070201	regulation of establishment of protein localization	0.620711	-0.47689	22	1	0.010101	33571	tim
GO:0018209	peptidyl-serine modification	0.620711	-0.47689	22	1	0.010101	48311	Pkc53E
GO:0050773	regulation of dendrite development	0.620711	-0.47689	22	1	0.010101	37557	babos
GO:0031330	negative regulation of cellular catabolic process	0.620711	-0.47689	22	1	0.010101	39150	Ilp2
GO:0034250	positive regulation of cellular amide metabolic process	0.620711	-0.47689	22	1	0.010101	39108	RpS9
GO:0090087	regulation of peptide transport	0.620711	-0.47689	22	1	0.010101	33571	tim
GO:0018105	peptidyl-serine phosphorylation	0.620711	-0.47689	22	1	0.010101	48311	Pkc53E
GO:0016236	macroautophagy	0.620711	-0.47689	22	1	0.010101	38846	lqf
GO:0019098	reproductive behavior	0.630276	-0.461598	49	2	0.020202	3915033571	Ilp2,tim
GO:0010975	regulation of neuron projection development	0.630276	-0.461598	49	2	0.020202	3755732400	babos,NetB
GO:0006397	mRNA processing	0.630276	-0.461598	49	2	0.020202	416707354399	B52,CG17454
GO:0006629	lipid metabolic process	0.631843	-0.459115	125	5	0.0505051	3.57614e+24	ACC,ATPCL,laza,CG9512,CG14945
GO:0009895	negative regulation of catabolic process	0.637144	-0.450759	23	1	0.010101	39150	Ilp2
GO:0031047	gene silencing by RNA	0.637144	-0.450759	23	1	0.010101	42994	Smg6
GO:0046620	regulation of organ growth	0.637144	-0.450759	23	1	0.010101	39150	Ilp2
GO:0042551	neuron maturation	0.637144	-0.450759	23	1	0.010101	42509	Usp8
GO:0030177	positive regulation of Wnt signaling pathway	0.637144	-0.450759	23	1	0.010101	42509	Usp8
GO:0008544	epidermis development	0.637144	-0.450759	23	1	0.010101	39399	app
GO:0006120	mitochondrial electron transport, NADH to ubiquinone	0.637144	-0.450759	23	1	0.010101	37466	ND-B12
GO:0009100	glycoprotein metabolic process	0.637144	-0.450759	23	1	0.010101	33271	ninaA
GO:0022416	chaeta development	0.637144	-0.450759	23	1	0.010101	41062	pyd
GO:0019438	aromatic compound biosynthetic process	0.639432	-0.447175	101	4	0.040404	3.67603e+19	ATPCL,CG12116,Smg6,t
GO:0043933	protein-containing complex subunit organization	0.640049	-0.446211	151	6	0.0606061	4.13725e+31	RpL24-like,RpL12,CG34242,Pfk,ND-B12,CG17996
GO:1901701	cellular response to oxygen-containing compound	0.641379	-0.444135	50	2	0.020202	3915035761	Ilp2,ACC
GO:0008038	neuron recognition	0.641379	-0.444135	50	2	0.020202	3240035949	NetB,hig
GO:0051345	positive regulation of hydrolase activity	0.641379	-0.444135	50	2	0.020202	335513340148	conu,Gbeta76C
GO:0030029	actin filament-based process	0.647267	-0.434997	102	4	0.040404	4.11184e+19	FER,Mlp60A,up,Zasp52
GO:0022603	regulation of anatomical structure morphogenesis	0.647267	-0.434997	102	4	0.040404	4.11184e+19	FER,pyd,NetB,babos
GO:0018958	phenol-containing compound metabolic process	0.652872	-0.426374	24	1	0.010101	31863	t
GO:0002697	regulation of immune effector process	0.652872	-0.426374	24	1	0.010101	40292	Pitslre
GO:0008045	motor neuron axon guidance	0.652872	-0.426374	24	1	0.010101	32400	NetB
GO:0071705	nitrogen compound transport	0.659975	-0.415554	179	7	0.0707071	4.06332e+35	Hph,CG30392,tim,ninaC,CG1628,Rh50,app
GO:0018130	heterocycle biosynthetic process	0.662605	-0.411577	104	4	0.040404	3.67603e+19	ATPCL,CG12116,Smg6,t
GO:1901615	organic hydroxy compound metabolic process	0.662805	-0.411275	52	2	0.020202	3178231863	CG12116,t
GO:1901699	cellular response to nitrogen compound	0.667925	-0.403579	25	1	0.010101	39150	Ilp2
GO:0050658	RNA transport	0.667925	-0.403579	25	1	0.010101	34012	ninaC
GO:0050657	nucleic acid transport	0.667925	-0.403579	25	1	0.010101	34012	ninaC
GO:0071695	anatomical structure maturation	0.667925	-0.403579	25	1	0.010101	42509	Usp8
GO:0071417	cellular response to organonitrogen compound	0.667925	-0.403579	25	1	0.010101	39150	Ilp2
GO:0006338	chromatin remodeling	0.667925	-0.403579	25	1	0.010101	43559	Nph
GO:0008037	cell recognition	0.673132	-0.395814	53	2	0.020202	3240035949	NetB,hig
GO:0051186	cofactor metabolic process	0.673132	-0.395814	53	2	0.020202	3178236760	CG12116,ATPCL
GO:0065009	regulation of molecular function	0.678097	-0.388465	157	6	0.0606061	3.35714e+31	tim,Gbeta76C,conu,Arr1,Slob,Arr2
GO:0009967	positive regulation of signal transduction	0.680215	-0.385346	132	5	0.0505051	4.02923e+24	Pitslre,PsGEF,Usp8,pyd,lqf
GO:0051236	establishment of RNA localization	0.682331	-0.38224	26	1	0.010101	34012	ninaC
GO:0042063	gliogenesis	0.682331	-0.38224	26	1	0.010101	32400	NetB
GO:0043269	regulation of ion transport	0.682331	-0.38224	26	1	0.010101	34038	Slob
GO:0007043	cell-cell junction assembly	0.682331	-0.38224	26	1	0.010101	41062	pyd
GO:0008610	lipid biosynthetic process	0.683205	-0.380961	54	2	0.020202	3576136760	ACC,ATPCL
GO:0042594	response to starvation	0.683205	-0.380961	54	2	0.020202	3915034038	Ilp2,Slob
GO:0051336	regulation of hydrolase activity	0.685595	-0.377468	81	3	0.030303	3.35513e+16	conu,Gbeta76C,Slob
GO:0070887	cellular response to chemical stimulus	0.693249	-0.366367	134	5	0.0505051	3.57614e+24	ACC,Hph,trp,Ilp2,trpl
GO:0009057	macromolecule catabolic process	0.693249	-0.366367	134	5	0.0505051	3.80064e+24	gol,Smg6,cu,Fbxl4,Usp8
GO:0050770	regulation of axonogenesis	0.696119	-0.362235	27	1	0.010101	32400	NetB
GO:0030258	lipid modification	0.696119	-0.362235	27	1	0.010101	40468	laza
GO:0048488	synaptic vesicle endocytosis	0.696119	-0.362235	27	1	0.010101	38846	lqf
GO:0140238	presynaptic endocytosis	0.696119	-0.362235	27	1	0.010101	38846	lqf
GO:0000209	protein polyubiquitination	0.696119	-0.362235	27	1	0.010101	32378	Fbxl4
GO:0007267	cell-cell signaling	0.699631	-0.357202	135	5	0.0505051	4.29943e+24	Smg6,Slob,lqf,5-HT2A,Ekar
GO:0006511	ubiquitin-dependent protein catabolic process	0.701679	-0.354279	83	3	0.030303	380064250932378	gol,Usp8,Fbxl4
GO:0070647	protein modification by small protein conjugation or removal	0.701679	-0.354279	83	3	0.030303	323784250938006	Fbxl4,Usp8,gol
GO:0007391	dorsal closure	0.702598	-0.352971	56	2	0.020202	4111841062	FER,pyd
GO:0006886	intracellular protein transport	0.705918	-0.348256	110	4	0.040404	3.40123e+19	ninaC,tim,Hph,app
GO:0050778	positive regulation of immune response	0.709314	-0.343457	28	1	0.010101	40292	Pitslre
GO:0006066	alcohol metabolic process	0.709314	-0.343457	28	1	0.010101	31782	CG12116
GO:0006974	cellular response to DNA damage stimulus	0.709314	-0.343457	28	1	0.010101	33571	tim
GO:0033044	regulation of chromosome organization	0.709314	-0.343457	28	1	0.010101	42994	Smg6
GO:0042886	amide transport	0.71824	-0.330951	138	5	0.0505051	3.93993e+25	app,tim,Hph,CG30392,ninaC
GO:0051493	regulation of cytoskeleton organization	0.721007	-0.327106	58	2	0.020202	335513331224	conu,PsGEF
GO:0030001	metal ion transport	0.721007	-0.327106	58	2	0.020202	3600343542	trpl,trp
GO:0051050	positive regulation of transport	0.721007	-0.327106	58	2	0.020202	3357148311	tim,Pkc53E
GO:0031346	positive regulation of cell projection organization	0.721941	-0.325812	29	1	0.010101	31224	PsGEF
GO:0002833	positive regulation of response to biotic stimulus	0.721941	-0.325812	29	1	0.010101	40292	Pitslre
GO:0036465	synaptic vesicle recycling	0.721941	-0.325812	29	1	0.010101	38846	lqf
GO:0006915	apoptotic process	0.721941	-0.325812	29	1	0.010101	33271	ninaA
GO:0009620	response to fungus	0.721941	-0.325812	29	1	0.010101	38409	Drsl5
GO:0006650	glycerophospholipid metabolic process	0.721941	-0.325812	29	1	0.010101	34623	CG14945
GO:0010648	negative regulation of cell communication	0.724262	-0.322601	139	5	0.0505051	4.10624e+24	pyd,Arr2,Gbeta76C,Arr1,Fbxl4
GO:0019941	modification-dependent protein catabolic process	0.72464	-0.32208	86	3	0.030303	425093237838006	Usp8,Fbxl4,gol
GO:1901362	organic cyclic compound biosynthetic process	0.726041	-0.320149	113	4	0.040404	3.17824e+19	CG12116,ATPCL,t,Smg6
GO:0022613	ribonucleoprotein complex biogenesis	0.729851	-0.314915	59	2	0.020202	4137245329	RpL24-like,RpL12
GO:0023057	negative regulation of signaling	0.730194	-0.314444	140	5	0.0505051	4.01484e+24	Gbeta76C,Arr1,Fbxl4,pyd,Arr2
GO:0043632	modification-dependent macromolecule catabolic process	0.731986	-0.311994	87	3	0.030303	323784250938006	Fbxl4,Usp8,gol
GO:0098660	inorganic ion transmembrane transport	0.731986	-0.311994	87	3	0.030303	414284354236003	ClC-a,trp,trpl
GO:0046395	carboxylic acid catabolic process	0.734025	-0.309212	30	1	0.010101	38484	Gad1
GO:0010564	regulation of cell cycle process	0.734025	-0.309212	30	1	0.010101	41670	B52
GO:0016054	organic acid catabolic process	0.734025	-0.309212	30	1	0.010101	38484	Gad1
GO:0034329	cell junction assembly	0.734025	-0.309212	30	1	0.010101	41062	pyd
GO:0015931	nucleobase-containing compound transport	0.734025	-0.309212	30	1	0.010101	34012	ninaC
GO:0005096	GTPase activator activity	0.734025	-0.309212	30	1	0.010101	3355133	conu
GO:0045216	cell-cell junction organization	0.734025	-0.309212	30	1	0.010101	41062	pyd
GO:0006605	protein targeting	0.745589	-0.29358	31	1	0.010101	39399	app
GO:0055088	lipid homeostasis	0.745589	-0.29358	31	1	0.010101	39150	Ilp2
GO:0090066	regulation of anatomical structure size	0.746222	-0.292732	89	3	0.030303	3.91503e+16	Ilp2,conu,PsGEF
GO:0048585	negative regulation of response to stimulus	0.753019	-0.283665	144	5	0.0505051	3.89934e+24	Arr2,pyd,Gbeta76C,Arr1,Cbp53E
GO:0007155	cell adhesion	0.754984	-0.281059	62	2	0.020202	4369041062	chp,pyd
GO:0051726	regulation of cell cycle	0.754984	-0.281059	62	2	0.020202	4167033571	B52,tim
GO:0016458	gene silencing	0.756656	-0.278847	32	1	0.010101	42994	Smg6
GO:0002684	positive regulation of immune system process	0.756656	-0.278847	32	1	0.010101	40292	Pitslre
GO:0045055	regulated exocytosis	0.756656	-0.278847	32	1	0.010101	42015	Scp2
GO:0007346	regulation of mitotic cell cycle	0.756656	-0.278847	32	1	0.010101	41670	B52
GO:0060828	regulation of canonical Wnt signaling pathway	0.756656	-0.278847	32	1	0.010101	42509	Usp8
GO:0051235	maintenance of location	0.756656	-0.278847	32	1	0.010101	41474	Cpn
GO:0032870	cellular response to hormone stimulus	0.756656	-0.278847	32	1	0.010101	39150	Ilp2
GO:0031667	response to nutrient levels	0.762908	-0.270618	63	2	0.020202	3915034038	Ilp2,Slob
GO:0009991	response to extracellular stimulus	0.762908	-0.270618	63	2	0.020202	3403839150	Slob,Ilp2
GO:0001751	compound eye photoreceptor cell differentiation	0.762908	-0.270618	63	2	0.020202	4147443690	Cpn,chp
GO:0022610	biological adhesion	0.762908	-0.270618	63	2	0.020202	4369041062	chp,pyd
GO:0016319	mushroom body development	0.767245	-0.264949	33	1	0.010101	31224	PsGEF
GO:0043547	positive regulation of GTPase activity	0.767245	-0.264949	33	1	0.010101	3355133	conu
GO:0006839	mitochondrial transport	0.767245	-0.264949	33	1	0.010101	31990	CG1628
GO:0002252	immune effector process	0.767245	-0.264949	33	1	0.010101	41670	B52
GO:0051049	regulation of transport	0.769043	-0.262609	120	4	0.040404	3.40384e+19	Slob,pyd,Pkc53E,tim
GO:0010647	positive regulation of cell communication	0.769194	-0.262412	147	5	0.0505051	4.02923e+24	Pitslre,PsGEF,Usp8,pyd,lqf
GO:0023056	positive regulation of signaling	0.769194	-0.262412	147	5	0.0505051	3.12244e+24	PsGEF,Pitslre,Usp8,lqf,pyd
GO:0001754	eye photoreceptor cell differentiation	0.770611	-0.260571	64	2	0.020202	4147443690	Cpn,chp
GO:0016331	morphogenesis of embryonic epithelium	0.770611	-0.260571	64	2	0.020202	4106241118	pyd,FER
GO:0046903	secretion	0.772906	-0.257598	93	3	0.030303	388464201536003	lqf,Scp2,trpl
GO:0051603	proteolysis involved in cellular protein catabolic process	0.772906	-0.257598	93	3	0.030303	380063237842509	gol,Fbxl4,Usp8
GO:0044257	cellular protein catabolic process	0.772906	-0.257598	93	3	0.030303	323784250938006	Fbxl4,Usp8,gol
GO:0010817	regulation of hormone levels	0.777378	-0.251828	34	1	0.010101	32419	CG9512
GO:0009260	ribonucleotide biosynthetic process	0.777378	-0.251828	34	1	0.010101	36760	ATPCL
GO:0009152	purine ribonucleotide biosynthetic process	0.777378	-0.251828	34	1	0.010101	36760	ATPCL
GO:0034976	response to endoplasmic reticulum stress	0.777378	-0.251828	34	1	0.010101	33271	ninaA
GO:0048639	positive regulation of developmental growth	0.787075	-0.239432	35	1	0.010101	39150	Ilp2
GO:0098727	maintenance of cell number	0.787075	-0.239432	35	1	0.010101	45368	Treh
GO:0006457	protein folding	0.787075	-0.239432	35	1	0.010101	33271	ninaA
GO:0019827	stem cell population maintenance	0.787075	-0.239432	35	1	0.010101	45368	Treh
GO:0050829	defense response to Gram-negative bacterium	0.787075	-0.239432	35	1	0.010101	31460	CG16756
GO:0033554	cellular response to stress	0.789518	-0.236333	151	5	0.0505051	3.60034e+24	trpl,trp,ninaA,Hph,tim
GO:0048749	compound eye development	0.791186	-0.234222	124	4	0.040404	4.36904e+19	chp,Cpn,NetB,pyd
GO:0030163	protein catabolic process	0.791401	-0.23395	96	3	0.030303	380064250932378	gol,Usp8,Fbxl4
GO:0032880	regulation of protein localization	0.796353	-0.227713	36	1	0.010101	33571	tim
GO:0001736	establishment of planar polarity	0.796353	-0.227713	36	1	0.010101	39399	app
GO:0007164	establishment of tissue polarity	0.796353	-0.227713	36	1	0.010101	39399	app
GO:0006164	purine nucleotide biosynthetic process	0.796353	-0.227713	36	1	0.010101	36760	ATPCL
GO:0040029	regulation of gene expression, epigenetic	0.796353	-0.227713	36	1	0.010101	42994	Smg6
GO:0007517	muscle organ development	0.796353	-0.227713	36	1	0.010101	32314	up
GO:0008361	regulation of cell size	0.796353	-0.227713	36	1	0.010101	39150	Ilp2
GO:0046390	ribose phosphate biosynthetic process	0.796353	-0.227713	36	1	0.010101	36760	ATPCL
GO:0016567	protein ubiquitination	0.799306	-0.224011	68	2	0.020202	3800632378	gol,Fbxl4
GO:0007431	salivary gland development	0.80523	-0.216627	37	1	0.010101	32400	NetB
GO:0000122	negative regulation of transcription by RNA polymerase II	0.80523	-0.216627	37	1	0.010101	33571	tim
GO:0035272	exocrine system development	0.80523	-0.216627	37	1	0.010101	32400	NetB
GO:0043087	regulation of GTPase activity	0.80523	-0.216627	37	1	0.010101	3355133	conu
GO:0006790	sulfur compound metabolic process	0.80523	-0.216627	37	1	0.010101	36760	ATPCL
GO:0010608	posttranscriptional regulation of gene expression	0.805971	-0.215708	69	2	0.020202	3910842994	RpS9,Smg6
GO:0009968	negative regulation of signal transduction	0.806673	-0.214836	127	4	0.040404	3.89934e+19	Arr2,pyd,Arr1,Gbeta76C
GO:0007416	synapse assembly	0.813725	-0.206133	38	1	0.010101	38484	Gad1
GO:0032103	positive regulation of response to external stimulus	0.813725	-0.206133	38	1	0.010101	40292	Pitslre
GO:0072594	establishment of protein localization to organelle	0.813725	-0.206133	38	1	0.010101	33571	tim
GO:0032446	protein modification by small protein conjugation	0.818719	-0.200014	71	2	0.020202	3237838006	Fbxl4,gol
GO:0001654	eye development	0.821231	-0.196951	130	4	0.040404	4.36904e+19	chp,pyd,Cpn,NetB
GO:0048880	sensory system development	0.821231	-0.196951	130	4	0.040404	4.36903e+19	chp,NetB,Cpn,pyd
GO:0150063	visual system development	0.821231	-0.196951	130	4	0.040404	4.36904e+19	chp,pyd,NetB,Cpn
GO:0030111	regulation of Wnt signaling pathway	0.821852	-0.196195	39	1	0.010101	42509	Usp8
GO:0072522	purine-containing compound biosynthetic process	0.821852	-0.196195	39	1	0.010101	36760	ATPCL
GO:0016049	cell growth	0.821852	-0.196195	39	1	0.010101	41118	FER
GO:0046578	regulation of Ras protein signal transduction	0.821852	-0.196195	39	1	0.010101	31224	PsGEF
GO:0046530	photoreceptor cell differentiation	0.824811	-0.192601	72	2	0.020202	4147443690	Cpn,chp
GO:0015980	energy derivation by oxidation of organic compounds	0.824811	-0.192601	72	2	0.020202	3576137466	ACC,ND-B12
GO:0009725	response to hormone	0.829628	-0.186778	40	1	0.010101	39150	Ilp2
GO:0072657	protein localization to membrane	0.829628	-0.186778	40	1	0.010101	39399	app
GO:0060560	developmental growth involved in morphogenesis	0.829628	-0.186778	40	1	0.010101	41118	FER
GO:0001745	compound eye morphogenesis	0.829783	-0.186591	103	3	0.030303	436904106241474	chp,pyd,Cpn
GO:0098542	defense response to other organism	0.834749	-0.180625	104	3	0.030303	384093146041670	Drsl5,CG16756,B52
GO:1901565	organonitrogen compound catabolic process	0.834888	-0.180458	133	4	0.040404	4.25093e+19	Usp8,Fbxl4,Gad1,gol
GO:0016070	RNA metabolic process	0.834888	-0.180458	133	4	0.040404	7.3544e+21	CG17454,cu,Smg6,B52
GO:0001700	embryonic development via the syncytial blastoderm	0.836453	-0.178585	74	2	0.020202	4106241118	pyd,FER
GO:0006914	autophagy	0.837068	-0.177849	41	1	0.010101	38846	lqf
GO:0009165	nucleotide biosynthetic process	0.837068	-0.177849	41	1	0.010101	36760	ATPCL
GO:1901293	nucleoside phosphate biosynthetic process	0.837068	-0.177849	41	1	0.010101	36760	ATPCL
GO:0061919	process utilizing autophagic mechanism	0.837068	-0.177849	41	1	0.010101	38846	lqf
GO:0007169	transmembrane receptor protein tyrosine kinase signaling pathway	0.837068	-0.177849	41	1	0.010101	39150	Ilp2
GO:0048584	positive regulation of response to stimulus	0.838362	-0.176306	162	5	0.0505051	3.88464e+24	lqf,pyd,Usp8,Pitslre,PsGEF
GO:0090304	nucleic acid metabolic process	0.838362	-0.176306	162	5	0.0505051	4.16707e+26	B52,CG17454,cu,Smg6,tim
GO:0015031	protein transport	0.839246	-0.175251	134	4	0.040404	3.93993e+19	app,ninaC,Hph,tim
GO:0090596	sensory organ morphogenesis	0.839591	-0.174841	105	3	0.030303	436904147441062	chp,Cpn,pyd
GO:0048592	eye morphogenesis	0.839591	-0.174841	105	3	0.030303	414744106243690	Cpn,pyd,chp
GO:0015833	peptide transport	0.843509	-0.170184	135	4	0.040404	3.93994e+19	app,Hph,tim,ninaC
GO:0001738	morphogenesis of a polarized epithelium	0.844187	-0.169381	42	1	0.010101	39399	app
GO:0042775	mitochondrial ATP synthesis coupled electron transport	0.844187	-0.169381	42	1	0.010101	37466	ND-B12
GO:0051270	regulation of cellular component movement	0.844187	-0.169381	42	1	0.010101	32400	NetB
GO:0002682	regulation of immune system process	0.847399	-0.165584	76	2	0.020202	4831140292	Pkc53E,Pitslre
GO:0043085	positive regulation of catalytic activity	0.847399	-0.165584	76	2	0.020202	335513340148	conu,Gbeta76C
GO:0042773	ATP synthesis coupled electron transport	0.850997	-0.161346	43	1	0.010101	37466	ND-B12
GO:0042335	cuticle development	0.850997	-0.161346	43	1	0.010101	31863	t
GO:0034330	cell junction organization	0.850997	-0.161346	43	1	0.010101	41062	pyd
GO:0004842	ubiquitin-protein transferase activity	0.850997	-0.161346	43	1	0.010101	32378	Fbxl4
GO:0042330	taxis	0.851755	-0.160456	137	4	0.040404	3.35714e+19	tim,FER,NetB,laza
GO:0045664	regulation of neuron differentiation	0.852622	-0.159439	77	2	0.020202	3755732400	babos,NetB
GO:0007611	learning or memory	0.852622	-0.159439	77	2	0.020202	4354238484	trp,Gad1
GO:0009792	embryo development ending in birth or egg hatching	0.852622	-0.159439	77	2	0.020202	4111841062	FER,pyd
GO:0050890	cognition	0.852622	-0.159439	77	2	0.020202	4354238484	trp,Gad1
GO:0006508	proteolysis	0.85734	-0.153921	167	5	0.0505051	3.23784e+25	Fbxl4,Usp8,CG9649,CG31205,gol
GO:0009611	response to wounding	0.857513	-0.153719	44	1	0.010101	40627	rtp
GO:0051093	negative regulation of developmental process	0.857683	-0.153521	78	2	0.020202	3915038846	Ilp2,lqf
GO:0033043	regulation of organelle organization	0.85777	-0.15342	109	3	0.030303	3.35513e+16	conu,PsGEF,Smg6
GO:0042493	response to drug	0.862587	-0.14782	79	2	0.020202	3199040627	CG1628,rtp
GO:0007420	brain development	0.863746	-0.146476	45	1	0.010101	31224	PsGEF
GO:0045596	negative regulation of cell differentiation	0.863746	-0.146476	45	1	0.010101	38846	lqf
GO:0022904	respiratory electron transport chain	0.863746	-0.146476	45	1	0.010101	37466	ND-B12
GO:0006952	defense response	0.866174	-0.143669	111	3	0.030303	314604167038409	CG16756,B52,Drsl5
GO:0098662	inorganic cation transmembrane transport	0.867337	-0.142328	80	2	0.020202	3600343542	trpl,trp
GO:0051241	negative regulation of multicellular organismal process	0.867337	-0.142328	80	2	0.020202	3884632378	lqf,Fbxl4
GO:0032879	regulation of localization	0.867361	-0.142299	198	6	0.0606061	3.35715e+29	tim,Pkc53E,trp,NetB,pyd,Slob
GO:0048729	tissue morphogenesis	0.867361	-0.142299	198	6	0.0606061	4.10624e+29	pyd,app,gol,Hph,Usp8,FER
GO:1901698	response to nitrogen compound	0.86971	-0.139596	46	1	0.010101	39150	Ilp2
GO:0009266	response to temperature stimulus	0.86971	-0.139596	46	1	0.010101	40468	laza
GO:0010243	response to organonitrogen compound	0.86971	-0.139596	46	1	0.010101	39150	Ilp2
GO:0040012	regulation of locomotion	0.86971	-0.139596	46	1	0.010101	32400	NetB
GO:0045184	establishment of protein localization	0.870798	-0.138346	142	4	0.040404	3.93993e+19	app,ninaC,tim,Hph
GO:0031329	regulation of cellular catabolic process	0.871938	-0.137037	81	2	0.020202	3915042994	Ilp2,Smg6
GO:0034654	nucleobase-containing compound biosynthetic process	0.871938	-0.137037	81	2	0.020202	3676042994	ATPCL,Smg6
GO:0033365	protein localization to organelle	0.875414	-0.133058	47	1	0.010101	33571	tim
GO:0048732	gland development	0.875414	-0.133058	47	1	0.010101	32400	NetB
GO:0006887	exocytosis	0.875414	-0.133058	47	1	0.010101	42015	Scp2
GO:0050808	synapse organization	0.876394	-0.13194	82	2	0.020202	3848442994	Gad1,Smg6
GO:0006396	RNA processing	0.884884	-0.122299	84	2	0.020202	735439941670	CG17454,B52
GO:0032940	secretion by cell	0.884884	-0.122299	84	2	0.020202	4201538846	Scp2,lqf
GO:1901700	response to oxygen-containing compound	0.885323	-0.121803	116	3	0.030303	360603576139150	Pfk,ACC,Ilp2
GO:0060322	head development	0.886093	-0.120934	49	1	0.010101	31224	PsGEF
GO:0006403	RNA localization	0.886093	-0.120934	49	1	0.010101	34012	ninaC
GO:0006119	oxidative phosphorylation	0.886093	-0.120934	49	1	0.010101	37466	ND-B12
GO:0007528	neuromuscular junction development	0.891087	-0.115313	50	1	0.010101	38484	Gad1
GO:0048813	dendrite morphogenesis	0.891087	-0.115313	50	1	0.010101	32400	NetB
GO:0051129	negative regulation of cellular component organization	0.895864	-0.109966	51	1	0.010101	41062	pyd
GO:0099643	signal release from synapse	0.895864	-0.109966	51	1	0.010101	38846	lqf
GO:0007269	neurotransmitter secretion	0.895864	-0.109966	51	1	0.010101	38846	lqf
GO:0006417	regulation of translation	0.895864	-0.109966	51	1	0.010101	39108	RpS9
GO:0044089	positive regulation of cellular component biogenesis	0.895864	-0.109966	51	1	0.010101	31224	PsGEF
GO:0007423	sensory organ development	0.899867	-0.105508	151	4	0.040404	3.24004e+19	NetB,Cpn,pyd,chp
GO:0007424	open tracheal system development	0.900284	-0.105046	88	2	0.020202	4063341062	Hph,pyd
GO:0140352	export from cell	0.900284	-0.105046	88	2	0.020202	4201538846	Scp2,lqf
GO:0043902	positive regulation of multi-organism process	0.900434	-0.104878	52	1	0.010101	40292	Pitslre
GO:0002831	regulation of response to biotic stimulus	0.904805	-0.100036	53	1	0.010101	40292	Pitslre
GO:0016358	dendrite development	0.904805	-0.100036	53	1	0.010101	32400	NetB
GO:0050776	regulation of immune response	0.904805	-0.100036	53	1	0.010101	40292	Pitslre
GO:2000241	regulation of reproductive process	0.904805	-0.100036	53	1	0.010101	36236	Drip
GO:0044093	positive regulation of molecular function	0.90725	-0.0973368	90	2	0.020202	335513340148	conu,Gbeta76C
GO:0009894	regulation of catabolic process	0.90725	-0.0973368	90	2	0.020202	4299439150	Smg6,Ilp2
GO:0060541	respiratory system development	0.910563	-0.0936926	91	2	0.020202	4106240633	pyd,Hph
GO:0051276	chromosome organization	0.910563	-0.0936926	91	2	0.020202	4355942994	Nph,Smg6
GO:0060562	epithelial tube morphogenesis	0.910852	-0.0933748	155	4	0.040404	4.06334e+19	Hph,Usp8,app,pyd
GO:0009790	embryo development	0.910852	-0.0933748	155	4	0.040404	4.10624e+19	pyd,5-HT2A,gol,FER
GO:0012501	programmed cell death	0.912986	-0.0910352	55	1	0.010101	33271	ninaA
GO:0043161	proteasome-mediated ubiquitin-dependent protein catabolic process	0.912986	-0.0910352	55	1	0.010101	32378	Fbxl4
GO:0022900	electron transport chain	0.912986	-0.0910352	55	1	0.010101	37466	ND-B12
GO:0010629	negative regulation of gene expression	0.913784	-0.0901612	125	3	0.030303	335714133942994	tim,cu,Smg6
GO:0023061	signal release	0.916811	-0.0868541	56	1	0.010101	38846	lqf
GO:0007167	enzyme linked receptor protein signaling pathway	0.916811	-0.0868541	56	1	0.010101	39150	Ilp2
GO:0010498	proteasomal protein catabolic process	0.916811	-0.0868541	56	1	0.010101	32378	Fbxl4
GO:0045333	cellular respiration	0.916811	-0.0868541	56	1	0.010101	37466	ND-B12
GO:0008219	cell death	0.916811	-0.0868541	56	1	0.010101	33271	ninaA
GO:0034613	cellular protein localization	0.918384	-0.0851394	158	4	0.040404	3.93993e+19	app,ninaC,tim,Hph
GO:0016192	vesicle-mediated transport	0.920349	-0.0830026	189	5	0.0505051	3.56204e+24	Tsp42Ej,Arr1,Scp2,Arr2,lqf
GO:0071495	cellular response to endogenous stimulus	0.923969	-0.0790769	58	1	0.010101	39150	Ilp2
GO:0060341	regulation of cellular localization	0.923969	-0.0790769	58	1	0.010101	33571	tim
GO:0050790	regulation of catalytic activity	0.924265	-0.0787564	129	3	0.030303	3.40384e+16	Slob,Gbeta76C,conu
GO:0071310	cellular response to organic substance	0.92554	-0.0773783	96	2	0.020202	3915035761	Ilp2,ACC
GO:0090407	organophosphate biosynthetic process	0.927316	-0.0754612	59	1	0.010101	36760	ATPCL
GO:1901137	carbohydrate derivative biosynthetic process	0.927316	-0.0754612	59	1	0.010101	36760	ATPCL
GO:0099003	vesicle-mediated transport in synapse	0.930517	-0.0720153	60	1	0.010101	38846	lqf
GO:0099504	synaptic vesicle cycle	0.930517	-0.0720153	60	1	0.010101	38846	lqf
GO:0002009	morphogenesis of an epithelium	0.932647	-0.0697282	195	5	0.0505051	4.10624e+24	pyd,app,FER,Usp8,Hph
GO:0007010	cytoskeleton organization	0.932647	-0.0697282	195	5	0.0505051	4.11183e+24	FER,ninaC,Mlp60A,up,Zasp52
GO:0050767	regulation of neurogenesis	0.933368	-0.068956	99	2	0.020202	3240037557	NetB,babos
GO:0042742	defense response to bacterium	0.933578	-0.0687308	61	1	0.010101	31460	CG16756
GO:0006325	chromatin organization	0.933578	-0.0687308	61	1	0.010101	43559	Nph
GO:0046907	intracellular transport	0.934526	-0.0677154	196	5	0.0505051	3.35714e+24	tim,Hph,ninaC,Pmp70,app
GO:0034248	regulation of cellular amide metabolic process	0.936506	-0.0655996	62	1	0.010101	39108	RpS9
GO:0051130	positive regulation of cellular component organization	0.938151	-0.063844	101	2	0.020202	3122448311	PsGEF,Pkc53E
GO:0006836	neurotransmitter transport	0.939306	-0.0626142	63	1	0.010101	38846	lqf
GO:1902533	positive regulation of intracellular signal transduction	0.941983	-0.0597676	64	1	0.010101	31224	PsGEF
GO:0010033	response to organic substance	0.943191	-0.0584869	170	4	0.040404	3.60604e+19	Pfk,ACC,rtp,Ilp2
GO:0007476	imaginal disc-derived wing morphogenesis	0.944726	-0.05686	104	2	0.020202	4250939399	Usp8,app
GO:0007411	axon guidance	0.946768	-0.0547014	105	2	0.020202	4111832400	FER,NetB
GO:0045892	negative regulation of transcription, DNA-templated	0.946993	-0.0544637	66	1	0.010101	33571	tim
GO:0009719	response to endogenous stimulus	0.946993	-0.0544637	66	1	0.010101	39150	Ilp2
GO:0097485	neuron projection guidance	0.948738	-0.0526225	106	2	0.020202	3240041118	NetB,FER
GO:0051707	response to other organism	0.950849	-0.0504001	142	3	0.030303	416703146038409	B52,CG16756,Drsl5
GO:0035220	wing disc development	0.950849	-0.0504001	142	3	0.030303	393994106242509	app,pyd,Usp8
GO:0043207	response to external biotic stimulus	0.950849	-0.0504001	142	3	0.030303	416703146038409	B52,CG16756,Drsl5
GO:0009607	response to biotic stimulus	0.950849	-0.0504001	142	3	0.030303	384094167031460	Drsl5,B52,CG16756
GO:0035239	tube morphogenesis	0.951353	-0.0498699	175	4	0.040404	3.93994e+19	app,pyd,Hph,Usp8
GO:1902679	negative regulation of RNA biosynthetic process	0.951574	-0.049638	68	1	0.010101	33571	tim
GO:1903047	mitotic cell cycle process	0.951574	-0.049638	68	1	0.010101	41670	B52
GO:1903507	negative regulation of nucleic acid-templated transcription	0.951574	-0.049638	68	1	0.010101	33571	tim
GO:0006935	chemotaxis	0.952474	-0.0486922	108	2	0.020202	4111832400	FER,NetB
GO:0007472	wing disc morphogenesis	0.954244	-0.0468355	109	2	0.020202	3939942509	app,Usp8
GO:0035120	post-embryonic appendage morphogenesis	0.954244	-0.0468355	109	2	0.020202	4250939399	Usp8,app
GO:0070727	cellular macromolecule localization	0.955726	-0.0452841	178	4	0.040404	3.93994e+19	app,Hph,tim,ninaC
GO:0035114	imaginal disc-derived appendage morphogenesis	0.955952	-0.0450475	110	2	0.020202	3939942509	app,Usp8
GO:0035107	appendage morphogenesis	0.957599	-0.0433257	111	2	0.020202	3939942509	app,Usp8
GO:0008340	determination of adult lifespan	0.95772	-0.0431996	71	1	0.010101	39150	Ilp2
GO:0048737	imaginal disc-derived appendage development	0.959188	-0.0416679	112	2	0.020202	3939942509	app,Usp8
GO:0048736	appendage development	0.960721	-0.0400717	113	2	0.020202	4250939399	Usp8,app
GO:0048469	cell maturation	0.963093	-0.0376048	74	1	0.010101	42509	Usp8
GO:0010259	multicellular organism aging	0.963093	-0.0376048	74	1	0.010101	39150	Ilp2
GO:0010605	negative regulation of macromolecule metabolic process	0.964573	-0.0360699	185	4	0.040404	3.35714e+19	tim,cu,Ilp2,Smg6
GO:0007417	central nervous system development	0.96473	-0.0359073	75	1	0.010101	31224	PsGEF
GO:0007568	aging	0.966294	-0.034287	76	1	0.010101	39150	Ilp2
GO:0009617	response to bacterium	0.966294	-0.034287	76	1	0.010101	31460	CG16756
GO:0051253	negative regulation of RNA metabolic process	0.96922	-0.0312639	78	1	0.010101	33571	tim
GO:0045595	regulation of cell differentiation	0.969674	-0.030795	156	3	0.030303	388463240037557	lqf,NetB,babos
GO:0120036	plasma membrane bounded cell projection organization	0.969867	-0.0305966	190	4	0.040404	3.24004e+19	NetB,app,chp,FER
GO:0045165	cell fate commitment	0.970587	-0.0298544	79	1	0.010101	41062	pyd
GO:0030030	cell projection organization	0.970834	-0.0295998	191	4	0.040404	3.24004e+19	NetB,app,chp,FER
GO:0045934	negative regulation of nucleobase-containing compound metabolic process	0.973143	-0.027224	81	1	0.010101	33571	tim
GO:0007409	axonogenesis	0.975325	-0.0249841	125	2	0.020202	3240041118	NetB,FER
GO:0044087	regulation of cellular component biogenesis	0.975325	-0.0249841	125	2	0.020202	312243355133	PsGEF,conu
GO:0061024	membrane organization	0.97548	-0.0248261	83	1	0.010101	246587	CG30392
GO:0021700	developmental maturation	0.976571	-0.0237078	84	1	0.010101	42509	Usp8
GO:0040008	regulation of growth	0.977187	-0.0230768	127	2	0.020202	4063339150	Hph,Ilp2
GO:0061564	axon development	0.978915	-0.0213109	129	2	0.020202	3240041118	NetB,FER
GO:1902531	regulation of intracellular signal transduction	0.97973	-0.0204778	130	2	0.020202	335513331224	conu,PsGEF
GO:0040007	growth	0.981347	-0.0188287	89	1	0.010101	41118	FER
GO:0050803	regulation of synapse structure or activity	0.981347	-0.0188287	89	1	0.010101	43806	Ekar
GO:0048589	developmental growth	0.981347	-0.0188287	89	1	0.010101	41118	FER
GO:0016477	cell migration	0.98218	-0.0179806	90	1	0.010101	32400	NetB
GO:0048563	post-embryonic animal organ morphogenesis	0.984025	-0.0161038	136	2	0.020202	3939942509	app,Usp8
GO:0060284	regulation of cell development	0.984025	-0.0161038	136	2	0.020202	3755732400	babos,NetB
GO:0007560	imaginal disc morphogenesis	0.984025	-0.0161038	136	2	0.020202	3939942509	app,Usp8
GO:2000113	negative regulation of cellular macromolecule biosynthetic process	0.984463	-0.0156587	93	1	0.010101	33571	tim
GO:0048638	regulation of developmental growth	0.985158	-0.0149533	94	1	0.010101	39150	Ilp2
GO:0032270	positive regulation of cellular protein metabolic process	0.985822	-0.0142795	95	1	0.010101	39108	RpS9
GO:0010558	negative regulation of macromolecule biosynthetic process	0.985822	-0.0142795	95	1	0.010101	33571	tim
GO:0048870	cell motility	0.986457	-0.013636	96	1	0.010101	32400	NetB
GO:0002376	immune system process	0.986457	-0.013636	96	1	0.010101	41670	B52
GO:0051674	localization of cell	0.987642	-0.0124345	98	1	0.010101	32400	NetB
GO:0043900	regulation of multi-organism process	0.987642	-0.0124345	98	1	0.010101	40292	Pitslre
GO:0080134	regulation of response to stress	0.987642	-0.0124345	98	1	0.010101	36905	Cbp53E
GO:0031327	negative regulation of cellular biosynthetic process	0.987642	-0.0124345	98	1	0.010101	33571	tim
GO:0009890	negative regulation of biosynthetic process	0.987642	-0.0124345	98	1	0.010101	33571	tim
GO:0051094	positive regulation of developmental process	0.988196	-0.0118739	99	1	0.010101	39150	Ilp2
GO:0007166	cell surface receptor signaling pathway	0.988726	-0.0113385	100	1	0.010101	39150	Ilp2
GO:0051960	regulation of nervous system development	0.98931	-0.0107473	146	2	0.020202	3755732400	babos,NetB
GO:0007444	imaginal disc development	0.989385	-0.0106716	185	3	0.030303	425094106239399	Usp8,pyd,app
GO:0000278	mitotic cell cycle	0.989715	-0.0103387	102	1	0.010101	41670	B52
GO:0051247	positive regulation of protein metabolic process	0.989715	-0.0103387	102	1	0.010101	39108	RpS9
GO:0002165	instar larval or pupal development	0.989774	-0.0102791	186	3	0.030303	425093241939399	Usp8,CG9512,app
GO:0006357	regulation of transcription by RNA polymerase II	0.990535	-0.00951037	149	2	0.020202	3357141670	tim,B52
GO:0048569	post-embryonic animal organ development	0.990535	-0.00951037	149	2	0.020202	3939942509	app,Usp8
GO:0051240	positive regulation of multicellular organismal process	0.991039	-0.00900115	105	1	0.010101	39150	Ilp2
GO:0010557	positive regulation of macromolecule biosynthetic process	0.992195	-0.0078358	108	1	0.010101	39108	RpS9
GO:0007389	pattern specification process	0.99228	-0.00774955	154	2	0.020202	3240039399	NetB,app
GO:0048707	instar larval or pupal morphogenesis	0.99259	-0.00743755	155	2	0.020202	4250939399	Usp8,app
GO:0048667	cell morphogenesis involved in neuron differentiation	0.99259	-0.00743755	155	2	0.020202	3240041118	NetB,FER
GO:0048812	neuron projection morphogenesis	0.993449	-0.00657302	158	2	0.020202	3240041118	NetB,FER
GO:0048858	cell projection morphogenesis	0.993449	-0.00657302	158	2	0.020202	3240041118	NetB,FER
GO:0120039	plasma membrane bounded cell projection morphogenesis	0.993449	-0.00657302	158	2	0.020202	4111832400	FER,NetB
GO:0000902	cell morphogenesis	0.993738	-0.0062815	199	3	0.030303	411183576132400	FER,ACC,NetB
GO:0009886	post-embryonic animal morphogenesis	0.993966	-0.00605181	160	2	0.020202	4250939399	Usp8,app
GO:0007552	metamorphosis	0.994445	-0.00557088	162	2	0.020202	3939942509	app,Usp8
GO:0032990	cell part morphogenesis	0.99467	-0.00534456	163	2	0.020202	4111832400	FER,NetB
GO:0009891	positive regulation of biosynthetic process	0.995081	-0.00493144	118	1	0.010101	39108	RpS9
GO:0031328	positive regulation of cellular biosynthetic process	0.995081	-0.00493144	118	1	0.010101	39108	RpS9
GO:0030855	epithelial cell differentiation	0.995081	-0.00493144	118	1	0.010101	39399	app
GO:0010628	positive regulation of gene expression	0.995719	-0.0042905	121	1	0.010101	39108	RpS9
GO:0031175	neuron projection development	0.995846	-0.0041631	169	2	0.020202	3240041118	NetB,FER
GO:0000904	cell morphogenesis involved in differentiation	0.996335	-0.00367196	172	2	0.020202	4111832400	FER,NetB
GO:0022402	cell cycle process	0.996444	-0.00356273	125	1	0.010101	41670	B52
GO:0031324	negative regulation of cellular metabolic process	0.996768	-0.00323742	175	2	0.020202	3357139150	tim,Ilp2
GO:0003002	regionalization	0.997549	-0.00245444	133	1	0.010101	32400	NetB
GO:0007049	cell cycle	0.998993	-0.00100789	152	1	0.010101	41670	B52
GO:0051172	negative regulation of nitrogen compound metabolic process	0.999241	-0.000759744	158	1	0.010101	33571	tim
GO:0032268	regulation of cellular protein metabolic process	0.999842	-0.000158273	191	1	0.010101	39108	RpS9
GO:0051246	regulation of protein metabolic process	0.999892	-0.000107804	199	1	0.010101	39108	RpS9
GO:0051173	positive regulation of nitrogen compound metabolic process	0.999892	-0.000107804	199	1	0.010101	39108	RpS9
GO:0042447	hormone catabolic process	1	-1.54417e-12	2	0	0
GO:0045849	negative regulation of nurse cell apoptotic process	1	-1.54417e-12	2	0	0
GO:0016538	cyclin-dependent protein serine/threonine kinase regulator activity	1	-1.54417e-12	2	0	0
GO:0002090	regulation of receptor internalization	1	-1.54417e-12	2	0	0
GO:0001516	prostaglandin biosynthetic process	1	-1.54417e-12	2	0	0
GO:0046457	prostanoid biosynthetic process	1	-1.54417e-12	2	0	0
GO:0060729	intestinal epithelial structure maintenance	1	-1.54417e-12	2	0	0
GO:0048636	positive regulation of muscle organ development	1	-1.54417e-12	2	0	0
GO:0051793	medium-chain fatty acid catabolic process	1	-1.54417e-12	2	0	0
GO:0042682	regulation of compound eye cone cell fate specification	1	-1.54417e-12	2	0	0
GO:0048490	anterograde synaptic vesicle transport	1	-1.54417e-12	2	0	0
GO:0120033	negative regulation of plasma membrane bounded cell projection assembly	1	-1.54417e-12	2	0	0
GO:0015141	succinate transmembrane transporter activity	1	-1.54417e-12	2	0	0
GO:0009074	aromatic amino acid family catabolic process	1	-1.54417e-12	2	0	0
GO:0019388	galactose catabolic process	1	-1.54417e-12	2	0	0
GO:0051155	positive regulation of striated muscle cell differentiation	1	-1.54417e-12	2	0	0
GO:0071501	cellular response to sterol depletion	1	-1.54417e-12	2	0	0
GO:0016032	viral process	1	-1.54417e-12	2	0	0
GO:0003373	dynamin family protein polymerization involved in membrane fission	1	-1.54417e-12	2	0	0
GO:0097091	synaptic vesicle clustering	1	-1.54417e-12	2	0	0
GO:0035601	protein deacylation	1	-1.54417e-12	2	0	0
GO:0008349	MAP kinase kinase kinase kinase activity	1	-1.54417e-12	2	0	0
GO:0042574	retinal metabolic process	1	-1.54417e-12	2	0	0
GO:0097205	renal filtration	1	-1.54417e-12	2	0	0
GO:0015803	branched-chain amino acid transport	1	-1.54417e-12	2	0	0
GO:0010766	negative regulation of sodium ion transport	1	-1.54417e-12	2	0	0
GO:0071243	cellular response to arsenic-containing substance	1	-1.54417e-12	2	0	0
GO:2000249	regulation of actin cytoskeleton reorganization	1	-1.54417e-12	2	0	0
GO:0045611	negative regulation of hemocyte differentiation	1	-1.54417e-12	2	0	0
GO:0051127	positive regulation of actin nucleation	1	-1.54417e-12	2	0	0
GO:0046039	GTP metabolic process	1	-1.54417e-12	2	0	0
GO:1901679	nucleotide transmembrane transport	1	-1.54417e-12	2	0	0
GO:0042688	crystal cell differentiation	1	-1.54417e-12	2	0	0
GO:2001258	negative regulation of cation channel activity	1	-1.54417e-12	2	0	0
GO:0046485	ether lipid metabolic process	1	-1.54417e-12	2	0	0
GO:0048741	skeletal muscle fiber development	1	-1.54417e-12	2	0	0
GO:0032048	cardiolipin metabolic process	1	-1.54417e-12	2	0	0
GO:0030473	nuclear migration along microtubule	1	-1.54417e-12	2	0	0
GO:0055060	asymmetric neuroblast division resulting in ganglion mother cell formation	1	-1.54417e-12	2	0	0
GO:0031057	negative regulation of histone modification	1	-1.54417e-12	2	0	0
GO:1904377	positive regulation of protein localization to cell periphery	1	-1.54417e-12	2	0	0
GO:2000650	negative regulation of sodium ion transmembrane transporter activity	1	-1.54417e-12	2	0	0
GO:0007500	mesodermal cell fate determination	1	-1.54417e-12	2	0	0
GO:0046654	tetrahydrofolate biosynthetic process	1	-1.54417e-12	2	0	0
GO:0097061	dendritic spine organization	1	-1.54417e-12	2	0	0
GO:0048052	R1/R6 cell differentiation	1	-1.54417e-12	2	0	0
GO:2000766	negative regulation of cytoplasmic translation	1	-1.54417e-12	2	0	0
GO:0051149	positive regulation of muscle cell differentiation	1	-1.54417e-12	2	0	0
GO:0042178	xenobiotic catabolic process	1	-1.54417e-12	2	0	0
GO:2001013	epithelial cell proliferation involved in renal tubule morphogenesis	1	-1.54417e-12	2	0	0
GO:0007215	glutamate receptor signaling pathway	1	-1.54417e-12	2	0	0
GO:0007563	regulation of eclosion	1	-1.54417e-12	2	0	0
GO:0006563	L-serine metabolic process	1	-1.54417e-12	2	0	0
GO:0006013	mannose metabolic process	1	-1.54417e-12	2	0	0
GO:0045434	negative regulation of female receptivity, post-mating	1	-1.54417e-12	2	0	0
GO:0048261	negative regulation of receptor-mediated endocytosis	1	-1.54417e-12	2	0	0
GO:0035087	siRNA loading onto RISC involved in RNA interference	1	-1.54417e-12	2	0	0
GO:0032069	regulation of nuclease activity	1	-1.54417e-12	2	0	0
GO:0006000	fructose metabolic process	1	-1.54417e-12	2	0	0
GO:0032486	Rap protein signal transduction	1	-1.54417e-12	2	0	0
GO:0000023	maltose metabolic process	1	-1.54417e-12	2	0	0
GO:0003400	regulation of COPII vesicle coating	1	-1.54417e-12	2	0	0
GO:0009415	response to water	1	-1.54417e-12	2	0	0
GO:0071422	succinate transmembrane transport	1	-1.54417e-12	2	0	0
GO:0009409	response to cold	1	-1.54417e-12	2	0	0
GO:0042982	amyloid precursor protein metabolic process	1	-1.54417e-12	2	0	0
GO:0015114	phosphate ion transmembrane transporter activity	1	-1.54417e-12	2	0	0
GO:0050865	regulation of cell activation	1	-1.54417e-12	2	0	0
GO:0035170	lymph gland crystal cell differentiation	1	-1.54417e-12	2	0	0
GO:0043457	regulation of cellular respiration	1	-1.54417e-12	2	0	0
GO:0032371	regulation of sterol transport	1	-1.54417e-12	2	0	0
GO:0006642	triglyceride mobilization	1	-1.54417e-12	2	0	0
GO:1901018	positive regulation of potassium ion transmembrane transporter activity	1	-1.54417e-12	2	0	0
GO:0042249	establishment of planar polarity of embryonic epithelium	1	-1.54417e-12	2	0	0
GO:0046470	phosphatidylcholine metabolic process	1	-1.54417e-12	2	0	0
GO:1904031	positive regulation of cyclin-dependent protein kinase activity	1	-1.54417e-12	2	0	0
GO:0051249	regulation of lymphocyte activation	1	-1.54417e-12	2	0	0
GO:0045103	intermediate filament-based process	1	-1.54417e-12	2	0	0
GO:2001135	regulation of endocytic recycling	1	-1.54417e-12	2	0	0
GO:1903115	regulation of actin filament-based movement	1	-1.54417e-12	2	0	0
GO:0032435	negative regulation of proteasomal ubiquitin-dependent protein catabolic process	1	-1.54417e-12	2	0	0
GO:0014904	myotube cell development	1	-1.54417e-12	2	0	0
GO:2000059	negative regulation of ubiquitin-dependent protein catabolic process	1	-1.54417e-12	2	0	0
GO:1905808	positive regulation of synapse pruning	1	-1.54417e-12	2	0	0
GO:0060699	regulation of endoribonuclease activity	1	-1.54417e-12	2	0	0
GO:0006308	DNA catabolic process	1	-1.54417e-12	2	0	0
GO:0034629	cellular protein-containing complex localization	1	-1.54417e-12	2	0	0
GO:0031058	positive regulation of histone modification	1	-1.54417e-12	2	0	0
GO:0004103	choline kinase activity	1	-1.54417e-12	2	0	0
GO:0006559	L-phenylalanine catabolic process	1	-1.54417e-12	2	0	0
GO:1902882	regulation of response to oxidative stress	1	-1.54417e-12	2	0	0
GO:0030714	anterior/posterior axis specification, follicular epithelium	1	-1.54417e-12	2	0	0
GO:0006627	protein processing involved in protein targeting to mitochondrion	1	-1.54417e-12	2	0	0
GO:0035321	maintenance of imaginal disc-derived wing hair orientation	1	-1.54417e-12	2	0	0
GO:0043491	protein kinase B signaling	1	-1.54417e-12	2	0	0
GO:0006098	pentose-phosphate shunt	1	-1.54417e-12	2	0	0
GO:0046885	regulation of hormone biosynthetic process	1	-1.54417e-12	2	0	0
GO:0000741	karyogamy	1	-1.54417e-12	2	0	0
GO:0019217	regulation of fatty acid metabolic process	1	-1.54417e-12	2	0	0
GO:0015820	leucine transport	1	-1.54417e-12	2	0	0
GO:0007214	gamma-aminobutyric acid signaling pathway	1	-1.54417e-12	2	0	0
GO:0046693	sperm storage	1	-1.54417e-12	2	0	0
GO:1902407	assembly of actomyosin apparatus involved in mitotic cytokinesis	1	-1.54417e-12	2	0	0
GO:0034724	DNA replication-independent nucleosome organization	1	-1.54417e-12	2	0	0
GO:0006542	glutamine biosynthetic process	1	-1.54417e-12	2	0	0
GO:0072665	protein localization to vacuole	1	-1.54417e-12	2	0	0
GO:0018279	protein N-linked glycosylation via asparagine	1	-1.54417e-12	2	0	0
GO:0034759	regulation of iron ion transmembrane transport	1	-1.54417e-12	2	0	0
GO:0006188	IMP biosynthetic process	1	-1.54417e-12	2	0	0
GO:0030277	maintenance of gastrointestinal epithelium	1	-1.54417e-12	2	0	0
GO:0043101	purine-containing compound salvage	1	-1.54417e-12	2	0	0
GO:2000427	positive regulation of apoptotic cell clearance	1	-1.54417e-12	2	0	0
GO:0060996	dendritic spine development	1	-1.54417e-12	2	0	0
GO:0048096	chromatin-mediated maintenance of transcription	1	-1.54417e-12	2	0	0
GO:0032374	regulation of cholesterol transport	1	-1.54417e-12	2	0	0
GO:0005381	iron ion transmembrane transporter activity	1	-1.54417e-12	2	0	0
GO:0010811	positive regulation of cell-substrate adhesion	1	-1.54417e-12	2	0	0
GO:0006384	transcription initiation from RNA polymerase III promoter	1	-1.54417e-12	2	0	0
GO:0015695	organic cation transport	1	-1.54417e-12	2	0	0
GO:1901379	regulation of potassium ion transmembrane transport	1	-1.54417e-12	2	0	0
GO:0010912	positive regulation of isomerase activity	1	-1.54417e-12	2	0	0
GO:0010469	regulation of signaling receptor activity	1	-1.54417e-12	2	0	0
GO:0046596	regulation of viral entry into host cell	1	-1.54417e-12	2	0	0
GO:0004935	adrenergic receptor activity	1	-1.54417e-12	2	0	0
GO:0008299	isoprenoid biosynthetic process	1	-1.54417e-12	2	0	0
GO:0043555	regulation of translation in response to stress	1	-1.54417e-12	2	0	0
GO:0018991	oviposition	1	-1.54417e-12	2	0	0
GO:0001956	positive regulation of neurotransmitter secretion	1	-1.54417e-12	2	0	0
GO:0034758	positive regulation of iron ion transport	1	-1.54417e-12	2	0	0
GO:2000831	regulation of steroid hormone secretion	1	-1.54417e-12	2	0	0
GO:0032814	regulation of natural killer cell activation	1	-1.54417e-12	2	0	0
GO:0050866	negative regulation of cell activation	1	-1.54417e-12	2	0	0
GO:0051791	medium-chain fatty acid metabolic process	1	-1.54417e-12	2	0	0
GO:0044419	interspecies interaction between organisms	1	-1.54417e-12	2	0	0
GO:1904746	negative regulation of apoptotic process involved in development	1	-1.54417e-12	2	0	0
GO:0007428	primary branching, open tracheal system	1	-1.54417e-12	2	0	0
GO:0045143	homologous chromosome segregation	1	-1.54417e-12	2	0	0
GO:0004383	guanylate cyclase activity	1	-1.54417e-12	2	0	0
GO:0098700	neurotransmitter loading into synaptic vesicle	1	-1.54417e-12	2	0	0
GO:0035297	regulation of Malpighian tubule diameter	1	-1.54417e-12	2	0	0
GO:0048735	haltere morphogenesis	1	-1.54417e-12	2	0	0
GO:0032824	negative regulation of natural killer cell differentiation	1	-1.54417e-12	2	0	0
GO:0030038	contractile actin filament bundle assembly	1	-1.54417e-12	2	0	0
GO:1990399	epithelium regeneration	1	-1.54417e-12	2	0	0
GO:0031937	positive regulation of chromatin silencing	1	-1.54417e-12	2	0	0
GO:0110073	regulation of apical constriction involved in ventral furrow formation	1	-1.54417e-12	2	0	0
GO:0051250	negative regulation of lymphocyte activation	1	-1.54417e-12	2	0	0
GO:0046689	response to mercury ion	1	-1.54417e-12	2	0	0
GO:0007621	negative regulation of female receptivity	1	-1.54417e-12	2	0	0
GO:1902414	protein localization to cell junction	1	-1.54417e-12	2	0	0
GO:2000371	regulation of DNA topoisomerase (ATP-hydrolyzing) activity	1	-1.54417e-12	2	0	0
GO:0110011	regulation of basement membrane organization	1	-1.54417e-12	2	0	0
GO:0030042	actin filament depolymerization	1	-1.54417e-12	2	0	0
GO:0045620	negative regulation of lymphocyte differentiation	1	-1.54417e-12	2	0	0
GO:0046888	negative regulation of hormone secretion	1	-1.54417e-12	2	0	0
GO:0006656	phosphatidylcholine biosynthetic process	1	-1.54417e-12	2	0	0
GO:0032933	SREBP signaling pathway	1	-1.54417e-12	2	0	0
GO:1902305	regulation of sodium ion transmembrane transport	1	-1.54417e-12	2	0	0
GO:0035157	negative regulation of fusion cell fate specification	1	-1.54417e-12	2	0	0
GO:0098719	sodium ion import across plasma membrane	1	-1.54417e-12	2	0	0
GO:0090278	negative regulation of peptide hormone secretion	1	-1.54417e-12	2	0	0
GO:0006505	GPI anchor metabolic process	1	-1.54417e-12	2	0	0
GO:0006723	cuticle hydrocarbon biosynthetic process	1	-1.54417e-12	2	0	0
GO:0015179	L-amino acid transmembrane transporter activity	1	-1.54417e-12	2	0	0
GO:1900373	positive regulation of purine nucleotide biosynthetic process	1	-1.54417e-12	2	0	0
GO:0000154	rRNA modification	1	-1.54417e-12	2	0	0
GO:0048085	adult chitin-containing cuticle pigmentation	1	-1.54417e-12	2	0	0
GO:0006740	NADPH regeneration	1	-1.54417e-12	2	0	0
GO:0007193	adenylate cyclase-inhibiting G protein-coupled receptor signaling pathway	1	-1.54417e-12	2	0	0
GO:0001818	negative regulation of cytokine production	1	-1.54417e-12	2	0	0
GO:0060384	innervation	1	-1.54417e-12	2	0	0
GO:0016601	Rac protein signal transduction	1	-1.54417e-12	2	0	0
GO:0010824	regulation of centrosome duplication	1	-1.54417e-12	2	0	0
GO:0099054	presynapse assembly	1	-1.54417e-12	2	0	0
GO:0030708	germarium-derived female germ-line cyst encapsulation	1	-1.54417e-12	2	0	0
GO:0007374	posterior midgut invagination	1	-1.54417e-12	2	0	0
GO:0007216	G protein-coupled glutamate receptor signaling pathway	1	-1.54417e-12	2	0	0
GO:0045850	positive regulation of nurse cell apoptotic process	1	-1.54417e-12	2	0	0
GO:0060702	negative regulation of endoribonuclease activity	1	-1.54417e-12	2	0	0
GO:1903523	negative regulation of blood circulation	1	-1.54417e-12	2	0	0
GO:0048255	mRNA stabilization	1	-1.54417e-12	2	0	0
GO:0010037	response to carbon dioxide	1	-1.54417e-12	2	0	0
GO:0045619	regulation of lymphocyte differentiation	1	-1.54417e-12	2	0	0
GO:1904647	response to rotenone	1	-1.54417e-12	2	0	0
GO:2000543	positive regulation of gastrulation	1	-1.54417e-12	2	0	0
GO:1901314	regulation of histone H2A K63-linked ubiquitination	1	-1.54417e-12	2	0	0
GO:0002067	glandular epithelial cell differentiation	1	-1.54417e-12	2	0	0
GO:0007158	neuron cell-cell adhesion	1	-1.54417e-12	2	0	0
GO:2000425	regulation of apoptotic cell clearance	1	-1.54417e-12	2	0	0
GO:0006767	water-soluble vitamin metabolic process	1	-1.54417e-12	2	0	0
GO:0006301	postreplication repair	1	-1.54417e-12	2	0	0
GO:0015012	heparan sulfate proteoglycan biosynthetic process	1	-1.54417e-12	2	0	0
GO:0000337	regulation of transposition, DNA-mediated	1	-1.54417e-12	2	0	0
GO:1903573	negative regulation of response to endoplasmic reticulum stress	1	-1.54417e-12	2	0	0
GO:0031340	positive regulation of vesicle fusion	1	-1.54417e-12	2	0	0
GO:0110074	positive regulation of apical constriction involved in ventral furrow formation	1	-1.54417e-12	2	0	0
GO:1904747	positive regulation of apoptotic process involved in development	1	-1.54417e-12	2	0	0
GO:0045035	sensory organ precursor cell division	1	-1.54417e-12	2	0	0
GO:0009407	toxin catabolic process	1	-1.54417e-12	2	0	0
GO:0005049	nuclear export signal receptor activity	1	-1.54417e-12	2	0	0
GO:0021953	central nervous system neuron differentiation	1	-1.54417e-12	2	0	0
GO:0016320	endoplasmic reticulum membrane fusion	1	-1.54417e-12	2	0	0
GO:0035567	non-canonical Wnt signaling pathway	1	-1.54417e-12	2	0	0
GO:0099514	synaptic vesicle cytoskeletal transport	1	-1.54417e-12	2	0	0
GO:0046598	positive regulation of viral entry into host cell	1	-1.54417e-12	2	0	0
GO:0043455	regulation of secondary metabolic process	1	-1.54417e-12	2	0	0
GO:0009086	methionine biosynthetic process	1	-1.54417e-12	2	0	0
GO:0060074	synapse maturation	1	-1.54417e-12	2	0	0
GO:0060148	positive regulation of posttranscriptional gene silencing	1	-1.54417e-12	2	0	0
GO:1903076	regulation of protein localization to plasma membrane	1	-1.54417e-12	2	0	0
GO:0007249	I-kappaB kinase/NF-kappaB signaling	1	-1.54417e-12	2	0	0
GO:0046475	glycerophospholipid catabolic process	1	-1.54417e-12	2	0	0
GO:0045104	intermediate filament cytoskeleton organization	1	-1.54417e-12	2	0	0
GO:0006531	aspartate metabolic process	1	-1.54417e-12	2	0	0
GO:0006991	response to sterol depletion	1	-1.54417e-12	2	0	0
GO:0007440	foregut morphogenesis	1	-1.54417e-12	2	0	0
GO:1901861	regulation of muscle tissue development	1	-1.54417e-12	2	0	0
GO:0035180	larval wandering behavior	1	-1.54417e-12	2	0	0
GO:0015108	chloride transmembrane transporter activity	1	-1.54417e-12	2	0	0
GO:0019888	protein phosphatase regulator activity	1	-1.54417e-12	2	0	0
GO:0019464	glycine decarboxylation via glycine cleavage system	1	-1.54417e-12	2	0	0
GO:0006012	galactose metabolic process	1	-1.54417e-12	2	0	0
GO:0045313	rhabdomere membrane biogenesis	1	-1.54417e-12	2	0	0
GO:1902110	positive regulation of mitochondrial membrane permeability involved in apoptotic process	1	-1.54417e-12	2	0	0
GO:0008053	mitochondrial fusion	1	-1.54417e-12	2	0	0
GO:0048800	antennal morphogenesis	1	-1.54417e-12	2	0	0
GO:0072337	modified amino acid transport	1	-1.54417e-12	2	0	0
GO:0008295	spermidine biosynthetic process	1	-1.54417e-12	2	0	0
GO:0006183	GTP biosynthetic process	1	-1.54417e-12	2	0	0
GO:0042066	perineurial glial growth	1	-1.54417e-12	2	0	0
GO:0008359	regulation of bicoid mRNA localization	1	-1.54417e-12	2	0	0
GO:0051923	sulfation	1	-1.54417e-12	2	0	0
GO:0035311	wing cell fate specification	1	-1.54417e-12	2	0	0
GO:1902108	regulation of mitochondrial membrane permeability involved in apoptotic process	1	-1.54417e-12	2	0	0
GO:0070863	positive regulation of protein exit from endoplasmic reticulum	1	-1.54417e-12	2	0	0
GO:0043010	camera-type eye development	1	-1.54417e-12	2	0	0
GO:0006027	glycosaminoglycan catabolic process	1	-1.54417e-12	2	0	0
GO:0072175	epithelial tube formation	1	-1.54417e-12	2	0	0
GO:0002115	store-operated calcium entry	1	-1.54417e-12	2	0	0
GO:1990001	inhibition of cysteine-type endopeptidase activity involved in apoptotic process	1	-1.54417e-12	2	0	0
GO:0009113	purine nucleobase biosynthetic process	1	-1.54417e-12	2	0	0
GO:0010455	positive regulation of cell fate commitment	1	-1.54417e-12	2	0	0
GO:0044784	metaphase/anaphase transition of cell cycle	1	-1.54417e-12	2	0	0
GO:0007344	pronuclear fusion	1	-1.54417e-12	2	0	0
GO:0000054	ribosomal subunit export from nucleus	1	-1.54417e-12	2	0	0
GO:0006448	regulation of translational elongation	1	-1.54417e-12	2	0	0
GO:0031145	anaphase-promoting complex-dependent catabolic process	1	-1.54417e-12	2	0	0
GO:0043268	positive regulation of potassium ion transport	1	-1.54417e-12	2	0	0
GO:0051823	regulation of synapse structural plasticity	1	-1.54417e-12	2	0	0
GO:0061541	rhabdomere morphogenesis	1	-1.54417e-12	2	0	0
GO:0006954	inflammatory response	1	-1.54417e-12	2	0	0
GO:1902101	positive regulation of metaphase/anaphase transition of cell cycle	1	-1.54417e-12	2	0	0
GO:0008300	isoprenoid catabolic process	1	-1.54417e-12	2	0	0
GO:1902106	negative regulation of leukocyte differentiation	1	-1.54417e-12	2	0	0
GO:0000082	G1/S transition of mitotic cell cycle	1	-1.54417e-12	2	0	0
GO:0048668	collateral sprouting	1	-1.54417e-12	2	0	0
GO:1901385	regulation of voltage-gated calcium channel activity	1	-1.54417e-12	2	0	0
GO:0044783	G1 DNA damage checkpoint	1	-1.54417e-12	2	0	0
GO:0090113	regulation of ER to Golgi vesicle-mediated transport by GTP hydrolysis	1	-1.54417e-12	2	0	0
GO:0008302	female germline ring canal formation, actin assembly	1	-1.54417e-12	2	0	0
GO:0016578	histone deubiquitination	1	-1.54417e-12	2	0	0
GO:0006930	substrate-dependent cell migration, cell extension	1	-1.54417e-12	2	0	0
GO:0034756	regulation of iron ion transport	1	-1.54417e-12	2	0	0
GO:2001260	regulation of semaphorin-plexin signaling pathway	1	-1.54417e-12	2	0	0
GO:0030859	polarized epithelial cell differentiation	1	-1.54417e-12	2	0	0
GO:0043243	positive regulation of protein complex disassembly	1	-1.54417e-12	2	0	0
GO:0035287	head segmentation	1	-1.54417e-12	2	0	0
GO:0045822	negative regulation of heart contraction	1	-1.54417e-12	2	0	0
GO:0019835	cytolysis	1	-1.54417e-12	2	0	0
GO:0007458	progression of morphogenetic furrow involved in compound eye morphogenesis	1	-1.54417e-12	2	0	0
GO:0098734	macromolecule depalmitoylation	1	-1.54417e-12	2	0	0
GO:0043489	RNA stabilization	1	-1.54417e-12	2	0	0
GO:0018023	peptidyl-lysine trimethylation	1	-1.54417e-12	2	0	0
GO:1902369	negative regulation of RNA catabolic process	1	-1.54417e-12	2	0	0
GO:1901292	nucleoside phosphate catabolic process	1	-1.54417e-12	2	0	0
GO:0030810	positive regulation of nucleotide biosynthetic process	1	-1.54417e-12	2	0	0
GO:0060289	compartment boundary maintenance	1	-1.54417e-12	2	0	0
GO:0071896	protein localization to adherens junction	1	-1.54417e-12	2	0	0
GO:0098711	iron ion import across plasma membrane	1	-1.54417e-12	2	0	0
GO:0010797	regulation of multivesicular body size involved in endosome transport	1	-1.54417e-12	2	0	0
GO:0072697	protein localization to cell cortex	1	-1.54417e-12	2	0	0
GO:0048058	compound eye corneal lens development	1	-1.54417e-12	2	0	0
GO:0008090	retrograde axonal transport	1	-1.54417e-12	2	0	0
GO:0033212	iron import into cell	1	-1.54417e-12	2	0	0
GO:1904502	regulation of lipophagy	1	-1.54417e-12	2	0	0
GO:0015701	bicarbonate transport	1	-1.54417e-12	2	0	0
GO:0030950	establishment or maintenance of actin cytoskeleton polarity	1	-1.54417e-12	2	0	0
GO:0006940	regulation of smooth muscle contraction	1	-1.54417e-12	2	0	0
GO:1900544	positive regulation of purine nucleotide metabolic process	1	-1.54417e-12	2	0	0
GO:1990386	mitotic cleavage furrow ingression	1	-1.54417e-12	2	0	0
GO:0003678	DNA helicase activity	1	-1.54417e-12	2	0	0
GO:0032231	regulation of actin filament bundle assembly	1	-1.54417e-12	2	0	0
GO:0001817	regulation of cytokine production	1	-1.54417e-12	2	0	0
GO:0045874	positive regulation of sevenless signaling pathway	1	-1.54417e-12	2	0	0
GO:0097696	receptor signaling pathway via STAT	1	-1.54417e-12	2	0	0
GO:0009253	peptidoglycan catabolic process	1	-1.54417e-12	2	0	0
GO:0032957	inositol trisphosphate metabolic process	1	-1.54417e-12	2	0	0
GO:0061687	detoxification of inorganic compound	1	-1.54417e-12	2	0	0
GO:1903116	positive regulation of actin filament-based movement	1	-1.54417e-12	2	0	0
GO:0051383	kinetochore organization	1	-1.54417e-12	2	0	0
GO:1902915	negative regulation of protein polyubiquitination	1	-1.54417e-12	2	0	0
GO:0031441	negative regulation of mRNA 3'-end processing	1	-1.54417e-12	2	0	0
GO:0046456	icosanoid biosynthetic process	1	-1.54417e-12	2	0	0
GO:0030423	targeting of mRNA for destruction involved in RNA interference	1	-1.54417e-12	2	0	0
GO:0006558	L-phenylalanine metabolic process	1	-1.54417e-12	2	0	0
GO:1905820	positive regulation of chromosome separation	1	-1.54417e-12	2	0	0
GO:0015886	heme transport	1	-1.54417e-12	2	0	0
GO:1902105	regulation of leukocyte differentiation	1	-1.54417e-12	2	0	0
GO:0006842	tricarboxylic acid transport	1	-1.54417e-12	2	0	0
GO:0006903	vesicle targeting	1	-1.54417e-12	2	0	0
GO:0042800	histone methyltransferase activity (H3-K4 specific)	1	-1.54417e-12	2	0	0
GO:0006657	CDP-choline pathway	1	-1.54417e-12	2	0	0
GO:0071244	cellular response to carbon dioxide	1	-1.54417e-12	2	0	0
GO:0006471	protein ADP-ribosylation	1	-1.54417e-12	2	0	0
GO:0032823	regulation of natural killer cell differentiation	1	-1.54417e-12	2	0	0
GO:0051590	positive regulation of neurotransmitter transport	1	-1.54417e-12	2	0	0
GO:0022600	digestive system process	1	-1.54417e-12	2	0	0
GO:0010522	regulation of calcium ion transport into cytosol	1	-1.54417e-12	2	0	0
GO:0046680	response to DDT	1	-1.54417e-12	2	0	0
GO:0006646	phosphatidylethanolamine biosynthetic process	1	-1.54417e-12	2	0	0
GO:1902222	erythrose 4-phosphate/phosphoenolpyruvate family amino acid catabolic process	1	-1.54417e-12	2	0	0
GO:0045805	positive regulation of eclosion	1	-1.54417e-12	2	0	0
GO:0006623	protein targeting to vacuole	1	-1.54417e-12	2	0	0
GO:0060439	trachea morphogenesis	1	-1.54417e-12	2	0	0
GO:0048016	inositol phosphate-mediated signaling	1	-1.54417e-12	2	0	0
GO:0042219	cellular modified amino acid catabolic process	1	-1.54417e-12	2	0	0
GO:0017014	protein nitrosylation	1	-1.54417e-12	2	0	0
GO:0033183	negative regulation of histone ubiquitination	1	-1.54417e-12	2	0	0
GO:0010332	response to gamma radiation	1	-1.54417e-12	2	0	0
GO:1903423	positive regulation of synaptic vesicle recycling	1	-1.54417e-12	2	0	0
GO:0043653	mitochondrial fragmentation involved in apoptotic process	1	-1.54417e-12	2	0	0
GO:0045737	positive regulation of cyclin-dependent protein serine/threonine kinase activity	1	-1.54417e-12	2	0	0
GO:0070898	RNA polymerase III preinitiation complex assembly	1	-1.54417e-12	2	0	0
GO:0043550	regulation of lipid kinase activity	1	-1.54417e-12	2	0	0
GO:0045898	regulation of RNA polymerase II transcriptional preinitiation complex assembly	1	-1.54417e-12	2	0	0
GO:1903539	protein localization to postsynaptic membrane	1	-1.54417e-12	2	0	0
GO:0050654	chondroitin sulfate proteoglycan metabolic process	1	-1.54417e-12	2	0	0
GO:1901799	negative regulation of proteasomal protein catabolic process	1	-1.54417e-12	2	0	0
GO:0055069	zinc ion homeostasis	1	-1.54417e-12	2	0	0
GO:0048140	male germ-line cyst encapsulation	1	-1.54417e-12	2	0	0
GO:0019749	cytoskeleton-dependent cytoplasmic transport, nurse cell to oocyte	1	-1.54417e-12	2	0	0
GO:0007278	pole cell fate determination	1	-1.54417e-12	2	0	0
GO:0016202	regulation of striated muscle tissue development	1	-1.54417e-12	2	0	0
GO:0043697	cell dedifferentiation	1	-1.54417e-12	2	0	0
GO:0051897	positive regulation of protein kinase B signaling	1	-1.54417e-12	2	0	0
GO:0046710	GDP metabolic process	1	-1.54417e-12	2	0	0
GO:0072741	protein localization to cell division site	1	-1.54417e-12	2	0	0
GO:0019732	antifungal humoral response	1	-1.54417e-12	2	0	0
GO:0055089	fatty acid homeostasis	1	-1.54417e-12	2	0	0
GO:0043027	cysteine-type endopeptidase inhibitor activity involved in apoptotic process	1	-1.54417e-12	2	0	0
GO:0006882	cellular zinc ion homeostasis	1	-1.54417e-12	2	0	0
GO:0048150	behavioral response to ether	1	-1.54417e-12	2	0	0
GO:0034110	regulation of homotypic cell-cell adhesion	1	-1.54417e-12	2	0	0
GO:0003407	neural retina development	1	-1.54417e-12	2	0	0
GO:0007019	microtubule depolymerization	1	-1.54417e-12	2	0	0
GO:0043620	regulation of DNA-templated transcription in response to stress	1	-1.54417e-12	2	0	0
GO:0097384	cellular lipid biosynthetic process	1	-1.54417e-12	2	0	0
GO:0051966	regulation of synaptic transmission, glutamatergic	1	-1.54417e-12	2	0	0
GO:0051792	medium-chain fatty acid biosynthetic process	1	-1.54417e-12	2	0	0
GO:0006415	translational termination	1	-1.54417e-12	2	0	0
GO:0003156	regulation of animal organ formation	1	-1.54417e-12	2	0	0
GO:0097345	mitochondrial outer membrane permeabilization	1	-1.54417e-12	2	0	0
GO:0010796	regulation of multivesicular body size	1	-1.54417e-12	2	0	0
GO:0006577	amino-acid betaine metabolic process	1	-1.54417e-12	2	0	0
GO:0045612	positive regulation of hemocyte differentiation	1	-1.54417e-12	2	0	0
GO:0051926	negative regulation of calcium ion transport	1	-1.54417e-12	2	0	0
GO:0000187	activation of MAPK activity	1	-1.54417e-12	2	0	0
GO:0050673	epithelial cell proliferation	1	-1.54417e-12	2	0	0
GO:1903580	positive regulation of ATP metabolic process	1	-1.54417e-12	2	0	0
GO:0035036	sperm-egg recognition	1	-1.54417e-12	2	0	0
GO:0004864	protein phosphatase inhibitor activity	1	-1.54417e-12	2	0	0
GO:0035605	peptidyl-cysteine S-nitrosylase activity	1	-1.54417e-12	2	0	0
GO:2000495	regulation of cell proliferation involved in compound eye morphogenesis	1	-1.54417e-12	2	0	0
GO:0090208	positive regulation of triglyceride metabolic process	1	-1.54417e-12	2	0	0
GO:0007496	anterior midgut development	1	-1.54417e-12	2	0	0
GO:0033182	regulation of histone ubiquitination	1	-1.54417e-12	2	0	0
GO:0071875	adrenergic receptor signaling pathway	1	-1.54417e-12	2	0	0
GO:0007586	digestion	1	-1.54417e-12	2	0	0
GO:0046599	regulation of centriole replication	1	-1.54417e-12	2	0	0
GO:0007481	haltere disc morphogenesis	1	-1.54417e-12	2	0	0
GO:0006829	zinc ion transport	1	-1.54417e-12	2	0	0
GO:0007224	smoothened signaling pathway	1	-1.54417e-12	2	0	0
GO:0040037	negative regulation of fibroblast growth factor receptor signaling pathway	1	-1.54417e-12	2	0	0
GO:0060573	cell fate specification involved in pattern specification	1	-1.54417e-12	2	0	0
GO:0007185	transmembrane receptor protein tyrosine phosphatase signaling pathway	1	-1.54417e-12	2	0	0
GO:0032878	regulation of establishment or maintenance of cell polarity	1	-1.54417e-12	2	0	0
GO:0016037	light absorption	1	-1.54417e-12	2	0	0
GO:0010923	negative regulation of phosphatase activity	1	-1.54417e-12	2	0	0
GO:1900244	positive regulation of synaptic vesicle endocytosis	1	-1.54417e-12	2	0	0
GO:0042689	regulation of crystal cell differentiation	1	-1.54417e-12	2	0	0
GO:0007141	male meiosis I	1	-1.54417e-12	2	0	0
GO:0071577	zinc ion transmembrane transport	1	-1.54417e-12	2	0	0
GO:0048133	male germ-line stem cell asymmetric division	1	-1.54417e-12	2	0	0
GO:0031397	negative regulation of protein ubiquitination	1	-1.54417e-12	2	0	0
GO:0060701	negative regulation of ribonuclease activity	1	-1.54417e-12	2	0	0
GO:1903391	regulation of adherens junction organization	1	-1.54417e-12	2	0	0
GO:0043551	regulation of phosphatidylinositol 3-kinase activity	1	-1.54417e-12	2	0	0
GO:0048025	negative regulation of mRNA splicing, via spliceosome	1	-1.54417e-12	2	0	0
GO:2000272	negative regulation of signaling receptor activity	1	-1.54417e-12	2	0	0
GO:0008335	female germline ring canal stabilization	1	-1.54417e-12	2	0	0
GO:0035207	negative regulation of hemocyte proliferation	1	-1.54417e-12	2	0	0
GO:0061060	negative regulation of peptidoglycan recognition protein signaling pathway	1	-1.54417e-12	2	0	0
GO:0035262	gonad morphogenesis	1	-1.54417e-12	2	0	0
GO:2000649	regulation of sodium ion transmembrane transporter activity	1	-1.54417e-12	2	0	0
GO:0038001	paracrine signaling	1	-1.54417e-12	2	0	0
GO:0006697	ecdysone biosynthetic process	1	-1.54417e-12	2	0	0
GO:0000270	peptidoglycan metabolic process	1	-1.54417e-12	2	0	0
GO:0055081	anion homeostasis	1	-1.54417e-12	2	0	0
GO:0004001	adenosine kinase activity	1	-1.54417e-12	2	0	0
GO:0046331	lateral inhibition	1	-1.54417e-12	2	0	0
GO:0071630	nuclear protein quality control by the ubiquitin-proteasome system	1	-1.54417e-12	2	0	0
GO:0035176	social behavior	1	-1.54417e-12	2	0	0
GO:0060628	regulation of ER to Golgi vesicle-mediated transport	1	-1.54417e-12	2	0	0
GO:1900117	regulation of execution phase of apoptosis	1	-1.54417e-12	2	0	0
GO:0006102	isocitrate metabolic process	1	-1.54417e-12	2	0	0
GO:0071596	ubiquitin-dependent protein catabolic process via the N-end rule pathway	1	-1.54417e-12	2	0	0
GO:0007020	microtubule nucleation	1	-1.54417e-12	2	0	0
GO:0045745	positive regulation of G protein-coupled receptor signaling pathway	1	-1.54417e-12	2	0	0
GO:0070861	regulation of protein exit from endoplasmic reticulum	1	-1.54417e-12	2	0	0
GO:0045678	positive regulation of R7 cell differentiation	1	-1.54417e-12	2	0	0
GO:0035308	negative regulation of protein dephosphorylation	1	-1.54417e-12	2	0	0
GO:0000018	regulation of DNA recombination	1	-1.54417e-12	2	0	0
GO:0110010	basolateral protein secretion	1	-1.54417e-12	2	0	0
GO:0033962	cytoplasmic mRNA processing body assembly	1	-1.54417e-12	2	0	0
GO:0010897	negative regulation of triglyceride catabolic process	1	-1.54417e-12	2	0	0
GO:0048139	female germ-line cyst encapsulation	1	-1.54417e-12	2	0	0
GO:0018344	protein geranylgeranylation	1	-1.54417e-12	2	0	0
GO:0007100	mitotic centrosome separation	1	-1.54417e-12	2	0	0
GO:1905806	regulation of synapse pruning	1	-1.54417e-12	2	0	0
GO:0019228	neuronal action potential	1	-1.54417e-12	2	0	0
GO:0035883	enteroendocrine cell differentiation	1	-1.54417e-12	2	0	0
GO:0032815	negative regulation of natural killer cell activation	1	-1.54417e-12	2	0	0
GO:0010559	regulation of glycoprotein biosynthetic process	1	-1.54417e-12	2	0	0
GO:0045010	actin nucleation	1	-1.54417e-12	2	0	0
GO:1903018	regulation of glycoprotein metabolic process	1	-1.54417e-12	2	0	0
GO:0032827	negative regulation of natural killer cell differentiation involved in immune response	1	-1.54417e-12	2	0	0
GO:0010606	positive regulation of cytoplasmic mRNA processing body assembly	1	-1.54417e-12	2	0	0
GO:0005548	phospholipid transporter activity	1	-1.54417e-12	2	0	0
GO:0070071	proton-transporting two-sector ATPase complex assembly	1	-1.54417e-12	2	0	0
GO:1900371	regulation of purine nucleotide biosynthetic process	1	-1.54417e-12	2	0	0
GO:0008334	histone mRNA metabolic process	1	-1.54417e-12	2	0	0
GO:0009988	cell-cell recognition	1	-1.54417e-12	2	0	0
GO:0002694	regulation of leukocyte activation	1	-1.54417e-12	2	0	0
GO:0009052	pentose-phosphate shunt, non-oxidative branch	1	-1.54417e-12	2	0	0
GO:0007259	receptor signaling pathway via JAK-STAT	1	-1.54417e-12	2	0	0
GO:0034116	positive regulation of heterotypic cell-cell adhesion	1	-1.54417e-12	2	0	0
GO:1905153	regulation of membrane invagination	1	-1.54417e-12	2	0	0
GO:0034114	regulation of heterotypic cell-cell adhesion	1	-1.54417e-12	2	0	0
GO:0034552	respiratory chain complex II assembly	1	-1.54417e-12	2	0	0
GO:1902769	regulation of choline O-acetyltransferase activity	1	-1.54417e-12	2	0	0
GO:1900101	regulation of endoplasmic reticulum unfolded protein response	1	-1.54417e-12	2	0	0
GO:0046427	positive regulation of receptor signaling pathway via JAK-STAT	1	-1.54417e-12	2	0	0
GO:0008056	ocellus development	1	-1.54417e-12	2	0	0
GO:0097720	calcineurin-mediated signaling	1	-1.54417e-12	2	0	0
GO:0018119	peptidyl-cysteine S-nitrosylation	1	-1.54417e-12	2	0	0
GO:0071320	cellular response to cAMP	1	-1.54417e-12	2	0	0
GO:0010911	regulation of isomerase activity	1	-1.54417e-12	2	0	0
GO:0006562	proline catabolic process	1	-1.54417e-12	2	0	0
GO:0000335	negative regulation of transposition, DNA-mediated	1	-1.54417e-12	2	0	0
GO:0098815	modulation of excitatory postsynaptic potential	1	-1.54417e-12	2	0	0
GO:0048081	positive regulation of cuticle pigmentation	1	-1.54417e-12	2	0	0
GO:0045842	positive regulation of mitotic metaphase/anaphase transition	1	-1.54417e-12	2	0	0
GO:0006564	L-serine biosynthetic process	1	-1.54417e-12	2	0	0
GO:0045069	regulation of viral genome replication	1	-1.54417e-12	2	0	0
GO:0016073	snRNA metabolic process	1	-1.54417e-12	2	0	0
GO:1900045	negative regulation of protein K63-linked ubiquitination	1	-1.54417e-12	2	0	0
GO:0033499	galactose catabolic process via UDP-galactose	1	-1.54417e-12	2	0	0
GO:0060700	regulation of ribonuclease activity	1	-1.54417e-12	2	0	0
GO:1900620	acetate ester biosynthetic process	1	-1.54417e-12	2	0	0
GO:0007477	notum development	1	-1.54417e-12	2	0	0
GO:0004784	superoxide dismutase activity	1	-1.54417e-12	2	0	0
GO:0031038	myosin II filament organization	1	-1.54417e-12	2	0	0
GO:0099517	synaptic vesicle transport along microtubule	1	-1.54417e-12	2	0	0
GO:0042714	dosage compensation complex assembly	1	-1.54417e-12	2	0	0
GO:1902686	mitochondrial outer membrane permeabilization involved in programmed cell death	1	-1.54417e-12	2	0	0
GO:0044403	symbiont process	1	-1.54417e-12	2	0	0
GO:0071276	cellular response to cadmium ion	1	-1.54417e-12	2	0	0
GO:0090317	negative regulation of intracellular protein transport	1	-1.54417e-12	2	0	0
GO:0050650	chondroitin sulfate proteoglycan biosynthetic process	1	-1.54417e-12	2	0	0
GO:0045815	positive regulation of gene expression, epigenetic	1	-1.54417e-12	2	0	0
GO:0007339	binding of sperm to zona pellucida	1	-1.54417e-12	2	0	0
GO:2001243	negative regulation of intrinsic apoptotic signaling pathway	1	-1.54417e-12	2	0	0
GO:0035591	signaling adaptor activity	1	-1.54417e-12	2	0	0
GO:1903051	negative regulation of proteolysis involved in cellular protein catabolic process	1	-1.54417e-12	2	0	0
GO:0006574	valine catabolic process	1	-1.54417e-12	2	0	0
GO:0045947	negative regulation of translational initiation	1	-1.54417e-12	2	0	0
GO:0007091	metaphase/anaphase transition of mitotic cell cycle	1	-1.54417e-12	2	0	0
GO:0017143	insecticide metabolic process	1	-1.54417e-12	2	0	0
GO:0009303	rRNA transcription	1	-1.54417e-12	2	0	0
GO:0005385	zinc ion transmembrane transporter activity	1	-1.54417e-12	2	0	0
GO:0090209	negative regulation of triglyceride metabolic process	1	-1.54417e-12	2	0	0
GO:0006171	cAMP biosynthetic process	1	-1.54417e-12	2	0	0
GO:0032954	regulation of cytokinetic process	1	-1.54417e-12	2	0	0
GO:0060997	dendritic spine morphogenesis	1	-1.54417e-12	2	0	0
GO:0007529	establishment of synaptic specificity at neuromuscular junction	1	-1.54417e-12	2	0	0
GO:0031036	myosin II filament assembly	1	-1.54417e-12	2	0	0
GO:0034394	protein localization to cell surface	1	-1.54417e-12	2	0	0
GO:0030860	regulation of polarized epithelial cell differentiation	1	-1.54417e-12	2	0	0
GO:1902306	negative regulation of sodium ion transmembrane transport	1	-1.54417e-12	2	0	0
GO:0006895	Golgi to endosome transport	1	-1.54417e-12	2	0	0
GO:0035026	leading edge cell differentiation	1	-1.54417e-12	2	0	0
GO:0007270	neuron-neuron synaptic transmission	1	-1.54417e-12	2	0	0
GO:0045981	positive regulation of nucleotide metabolic process	1	-1.54417e-12	2	0	0
GO:0009437	carnitine metabolic process	1	-1.54417e-12	2	0	0
GO:0048581	negative regulation of post-embryonic development	1	-1.54417e-12	2	0	0
GO:0009396	folic acid-containing compound biosynthetic process	1	-1.54417e-12	2	0	0
GO:0007418	ventral midline development	1	-1.54417e-12	2	0	0
GO:0042062	long-term strengthening of neuromuscular junction	1	-1.54417e-12	2	0	0
GO:0034553	mitochondrial respiratory chain complex II assembly	1	-1.54417e-12	2	0	0
GO:0043162	ubiquitin-dependent protein catabolic process via the multivesicular body sorting pathway	1	-1.54417e-12	2	0	0
GO:0032074	negative regulation of nuclease activity	1	-1.54417e-12	2	0	0
GO:0017121	plasma membrane phospholipid scrambling	1	-1.54417e-12	2	0	0
GO:0008046	axon guidance receptor activity	1	-1.54417e-12	2	0	0
GO:0019433	triglyceride catabolic process	1	-1.54417e-12	2	0	0
GO:0016973	poly(A)+ mRNA export from nucleus	1	-1.54417e-12	2	0	0
GO:0009395	phospholipid catabolic process	1	-1.54417e-12	2	0	0
GO:0032511	late endosome to vacuole transport via multivesicular body sorting pathway	1	-1.54417e-12	2	0	0
GO:0015086	cadmium ion transmembrane transporter activity	1	-1.54417e-12	2	0	0
GO:1903801	L-leucine import across plasma membrane	1	-1.54417e-12	2	0	0
GO:0003254	regulation of membrane depolarization	1	-1.54417e-12	2	0	0
GO:0030237	female sex determination	1	-1.54417e-12	2	0	0
GO:0046889	positive regulation of lipid biosynthetic process	1	-1.54417e-12	2	0	0
GO:0050709	negative regulation of protein secretion	1	-1.54417e-12	2	0	0
GO:1904375	regulation of protein localization to cell periphery	1	-1.54417e-12	2	0	0
GO:0035188	hatching	1	-1.54417e-12	2	0	0
GO:1901016	regulation of potassium ion transmembrane transporter activity	1	-1.54417e-12	2	0	0
GO:0045168	cell-cell signaling involved in cell fate commitment	1	-1.54417e-12	2	0	0
GO:0001919	regulation of receptor recycling	1	-1.54417e-12	2	0	0
GO:0002092	positive regulation of receptor internalization	1	-1.54417e-12	2	0	0
GO:0018065	protein-cofactor linkage	1	-1.54417e-12	2	0	0
GO:0035794	positive regulation of mitochondrial membrane permeability	1	-1.54417e-12	2	0	0
GO:0002695	negative regulation of leukocyte activation	1	-1.54417e-12	2	0	0
GO:0045465	R8 cell differentiation	1	-1.54417e-12	2	0	0
GO:1901381	positive regulation of potassium ion transmembrane transport	1	-1.54417e-12	2	0	0
GO:0044843	cell cycle G1/S phase transition	1	-1.54417e-12	2	0	0
GO:0006741	NADP biosynthetic process	1	-1.54417e-12	2	0	0
GO:0044058	regulation of digestive system process	1	-1.54417e-12	2	0	0
GO:0009946	proximal/distal axis specification	1	-1.54417e-12	2	0	0
GO:0006896	Golgi to vacuole transport	1	-1.54417e-12	2	0	0
GO:0110117	positive regulation of compound eye photoreceptor cell differentiation	1	-1.54417e-12	2	0	0
GO:0044060	regulation of endocrine process	1	-1.54417e-12	2	0	0
GO:0046663	dorsal closure, leading edge cell differentiation	1	-1.54417e-12	2	0	0
GO:0000395	mRNA 5'-splice site recognition	1	-1.54417e-12	2	0	0
GO:0010890	positive regulation of sequestering of triglyceride	1	-1.54417e-12	2	0	0
GO:0021682	nerve maturation	1	-1.54417e-12	2	0	0
GO:1905268	negative regulation of chromatin organization	1	-1.54417e-12	2	0	0
GO:0035637	multicellular organismal signaling	1	-1.54417e-12	2	0	0
GO:0006929	substrate-dependent cell migration	1	-1.54417e-12	2	0	0
GO:1903475	mitotic actomyosin contractile ring assembly	1	-1.54417e-12	2	0	0
GO:0005992	trehalose biosynthetic process	1	-1.54417e-12	2	0	0
GO:1903307	positive regulation of regulated secretory pathway	1	-1.54417e-12	2	0	0
GO:0008216	spermidine metabolic process	1	-1.54417e-12	2	0	0
GO:0035171	lamellocyte differentiation	1	-1.54417e-12	2	0	0
GO:0051016	barbed-end actin filament capping	1	-1.54417e-12	2	0	0
GO:0014019	neuroblast development	1	-1.54417e-12	2	0	0
GO:0006939	smooth muscle contraction	1	-1.54417e-12	2	0	0
GO:0032826	regulation of natural killer cell differentiation involved in immune response	1	-1.54417e-12	2	0	0
GO:0004340	glucokinase activity	1	-1.54417e-12	2	0	0
GO:0010459	negative regulation of heart rate	1	-1.54417e-12	2	0	0
GO:0043967	histone H4 acetylation	1	-1.54417e-12	2	0	0
GO:0061647	histone H3-K9 modification	1	-1.54417e-12	2	0	0
GO:0010586	miRNA metabolic process	1	-1.54417e-12	2	0	0
GO:0010636	positive regulation of mitochondrial fusion	1	-1.54417e-12	2	0	0
GO:0042572	retinol metabolic process	1	-1.54417e-12	2	0	0
GO:0007320	insemination	1	-1.54417e-12	2	0	0
GO:0006023	aminoglycan biosynthetic process	1	-1.54417e-12	2	0	0
GO:0006965	positive regulation of biosynthetic process of antibacterial peptides active against Gram-positive bacteria	1	-1.54417e-12	2	0	0
GO:0061331	epithelial cell proliferation involved in Malpighian tubule morphogenesis	1	-1.54417e-12	2	0	0
GO:0086010	membrane depolarization during action potential	1	-1.54417e-12	2	0	0
GO:0006359	regulation of transcription by RNA polymerase III	1	-1.54417e-12	2	0	0
GO:0007205	protein kinase C-activating G protein-coupled receptor signaling pathway	1	-1.54417e-12	2	0	0
GO:0051601	exocyst localization	1	-1.54417e-12	2	0	0
GO:0010841	positive regulation of circadian sleep/wake cycle, wakefulness	1	-1.54417e-12	2	0	0
GO:0042693	muscle cell fate commitment	1	-1.54417e-12	2	0	0
GO:0032450	maltose alpha-glucosidase activity	1	-1.54417e-12	2	0	0
GO:1903363	negative regulation of cellular protein catabolic process	1	-1.54417e-12	2	0	0
GO:0010039	response to iron ion	1	-1.54417e-12	2	0	0
GO:0048210	Golgi vesicle fusion to target membrane	1	-1.54417e-12	2	0	0
GO:0106027	neuron projection organization	1	-1.54417e-12	2	0	0
GO:0034446	substrate adhesion-dependent cell spreading	1	-1.54417e-12	2	0	0
GO:0072666	establishment of protein localization to vacuole	1	-1.54417e-12	2	0	0
GO:0031887	lipid droplet transport along microtubule	1	-1.54417e-12	2	0	0
GO:0031104	dendrite regeneration	1	-1.54417e-12	2	0	0
GO:0004709	MAP kinase kinase kinase activity	1	-1.54417e-12	2	0	0
GO:0015810	aspartate transmembrane transport	1	-1.54417e-12	2	0	0
GO:0034497	protein localization to phagophore assembly site	1	-1.54417e-12	2	0	0
GO:0042691	positive regulation of crystal cell differentiation	1	-1.54417e-12	2	0	0
GO:1901678	iron coordination entity transport	1	-1.54417e-12	2	0	0
GO:0051639	actin filament network formation	1	-1.54417e-12	2	0	0
GO:1903430	negative regulation of cell maturation	1	-1.54417e-12	2	0	0
GO:0051703	intraspecies interaction between organisms	1	-1.54417e-12	2	0	0
GO:0072344	rescue of stalled ribosome	1	-1.54417e-12	2	0	0
GO:0031060	regulation of histone methylation	1	-1.54417e-12	2	0	0
GO:0034982	mitochondrial protein processing	1	-1.54417e-12	2	0	0
GO:1990504	dense core granule exocytosis	1	-1.54417e-12	2	0	0
GO:0033363	secretory granule organization	1	-1.54417e-12	2	0	0
GO:0036402	proteasome-activating ATPase activity	1	-1.54417e-12	2	0	0
GO:1990461	detoxification of iron ion	1	-1.54417e-12	2	0	0
GO:0030241	skeletal muscle myosin thick filament assembly	1	-1.54417e-12	2	0	0
GO:0051036	regulation of endosome size	1	-1.54417e-12	2	0	0
GO:0043154	negative regulation of cysteine-type endopeptidase activity involved in apoptotic process	1	-1.54417e-12	2	0	0
GO:0031571	mitotic G1 DNA damage checkpoint	1	-1.54417e-12	2	0	0
GO:0008608	attachment of spindle microtubules to kinetochore	1	-1.54417e-12	2	0	0
GO:0098713	leucine import across plasma membrane	1	-1.54417e-12	2	0	0
GO:0043622	cortical microtubule organization	1	-1.54417e-12	2	0	0
GO:0097250	mitochondrial respirasome assembly	1	-1.54417e-12	2	0	0
GO:0006516	glycoprotein catabolic process	1	-1.54417e-12	2	0	0
GO:2000637	positive regulation of gene silencing by miRNA	1	-1.54417e-12	2	0	0
GO:0072578	neurotransmitter-gated ion channel clustering	1	-1.54417e-12	2	0	0
GO:0097206	nephrocyte filtration	1	-1.54417e-12	2	0	0
GO:0006528	asparagine metabolic process	1	-1.54417e-12	2	0	0
GO:0071044	histone mRNA catabolic process	1	-1.54417e-12	2	0	0
GO:0046823	negative regulation of nucleocytoplasmic transport	1	-1.54417e-12	2	0	0
GO:1905345	protein localization to cleavage furrow	1	-1.54417e-12	2	0	0
GO:0060041	retina development in camera-type eye	1	-1.54417e-12	2	0	0
GO:0005078	MAP-kinase scaffold activity	1	-1.54417e-12	2	0	0
GO:1901970	positive regulation of mitotic sister chromatid separation	1	-1.54417e-12	2	0	0
GO:0000338	protein deneddylation	1	-1.54417e-12	2	0	0
GO:0043696	dedifferentiation	1	-1.54417e-12	2	0	0
GO:0044839	cell cycle G2/M phase transition	1	-1.54417e-12	2	0	0
GO:0090316	positive regulation of intracellular protein transport	1	-1.54417e-12	2	0	0
GO:0050905	neuromuscular process	1	-1.54417e-12	2	0	0
GO:0035169	lymph gland plasmatocyte differentiation	1	-1.54417e-12	2	0	0
GO:0089718	amino acid import across plasma membrane	1	-1.54417e-12	2	0	0
GO:0006585	dopamine biosynthetic process from tyrosine	1	-1.54417e-12	2	0	0
GO:0019226	transmission of nerve impulse	1	-1.54417e-12	2	0	0
GO:0051570	regulation of histone H3-K9 methylation	1	-1.54417e-12	2	0	0
GO:0048626	myoblast fate specification	1	-1.54417e-12	2	0	0
GO:1900044	regulation of protein K63-linked ubiquitination	1	-1.54417e-12	2	0	0
GO:0072348	sulfur compound transport	1	-1.54417e-12	2	0	0
GO:0061059	positive regulation of peptidoglycan recognition protein signaling pathway	1	-1.54417e-12	2	0	0
GO:0045910	negative regulation of DNA recombination	1	-1.54417e-12	2	0	0
GO:0007060	male meiosis chromosome segregation	1	-1.54417e-12	2	0	0
GO:1905710	positive regulation of membrane permeability	1	-1.54417e-12	2	0	0
GO:0006379	mRNA cleavage	1	-1.54417e-12	2	0	0
GO:0072321	chaperone-mediated protein transport	1	-1.54417e-12	2	0	0
GO:0035305	negative regulation of dephosphorylation	1	-1.54417e-12	2	0	0
GO:0033750	ribosome localization	1	-1.54417e-12	2	0	0
GO:0002816	regulation of biosynthetic process of antibacterial peptides active against Gram-positive bacteria	1	-1.54417e-12	2	0	0
GO:0048802	notum morphogenesis	1	-1.54417e-12	2	0	0
GO:2001242	regulation of intrinsic apoptotic signaling pathway	1	-1.54417e-12	2	0	0
GO:0061462	protein localization to lysosome	1	-1.54417e-12	2	0	0
GO:0000097	sulfur amino acid biosynthetic process	1	-1.54417e-12	2	0	0
GO:0035329	hippo signaling	1	-1.54417e-12	2	0	0
GO:0046835	carbohydrate phosphorylation	1	-1.54417e-12	2	0	0
GO:0046701	insecticide catabolic process	1	-1.54417e-12	2	0	0
GO:1901315	negative regulation of histone H2A K63-linked ubiquitination	1	-1.54417e-12	2	0	0
GO:0045472	response to ether	1	-1.54417e-12	2	0	0
GO:0008292	acetylcholine biosynthetic process	1	-1.54417e-12	2	0	0
GO:0050771	negative regulation of axonogenesis	1	-1.54417e-12	2	0	0
GO:0071168	protein localization to chromatin	1	-1.54417e-12	2	0	0
GO:0030371	translation repressor activity	1	-1.54417e-12	2	0	0
GO:0006277	DNA amplification	1	-1.54417e-12	2	0	0
GO:0009404	toxin metabolic process	1	-1.54417e-12	2	0	0
GO:0030201	heparan sulfate proteoglycan metabolic process	1	-1.54417e-12	2	0	0
GO:0006015	5-phosphoribose 1-diphosphate biosynthetic process	1	-1.54417e-12	2	0	0
GO:0071480	cellular response to gamma radiation	1	-1.54417e-12	2	0	0
GO:0032959	inositol trisphosphate biosynthetic process	1	-1.54417e-12	2	0	0
GO:0015691	cadmium ion transport	1	-1.54417e-12	2	0	0
GO:0046692	sperm competition	1	-1.54417e-12	2	0	0
GO:0006047	UDP-N-acetylglucosamine metabolic process	1	-1.54417e-12	2	0	0
GO:0009110	vitamin biosynthetic process	1	-1.54417e-12	2	0	0
GO:0006282	regulation of DNA repair	1	-1.54417e-12	2	0	0
GO:0015744	succinate transport	1	-1.54417e-12	2	0	0
GO:0006555	methionine metabolic process	1	-1.54417e-12	2	0	0
GO:0060288	formation of a compartment boundary	1	-1.54417e-12	2	0	0
GO:0008050	female courtship behavior	1	-1.54417e-12	2	0	0
GO:0032353	negative regulation of hormone biosynthetic process	1	-1.54417e-12	2	0	0
GO:0006506	GPI anchor biosynthetic process	1	-1.54417e-12	2	0	0
GO:0034587	piRNA metabolic process	1	-1.54417e-12	2	0	0
GO:1903818	positive regulation of voltage-gated potassium channel activity	1	-1.54417e-12	2	0	0
GO:0048674	collateral sprouting of injured axon	1	-1.54417e-12	2	0	0
GO:0003374	dynamin family protein polymerization involved in mitochondrial fission	1	-1.54417e-12	2	0	0
GO:0051781	positive regulation of cell division	1	-1.54417e-12	2	0	0
GO:0042766	nucleosome mobilization	1	-1.54417e-12	2	0	0
GO:0048209	regulation of vesicle targeting, to, from or within Golgi	1	-1.54417e-12	2	0	0
GO:0048142	germarium-derived cystoblast division	1	-1.54417e-12	2	0	0
GO:0006182	cGMP biosynthetic process	1	-1.54417e-12	2	0	0
GO:0018342	protein prenylation	1	-1.54417e-12	2	0	0
GO:0034761	positive regulation of iron ion transmembrane transport	1	-1.54417e-12	2	0	0
GO:1903078	positive regulation of protein localization to plasma membrane	1	-1.54417e-12	2	0	0
GO:0046391	5-phosphoribose 1-diphosphate metabolic process	1	-1.54417e-12	2	0	0
GO:0050774	negative regulation of dendrite morphogenesis	1	-1.54417e-12	2	0	0
GO:0060323	head morphogenesis	1	-1.54417e-12	2	0	0
GO:0007445	determination of imaginal disc primordium	1	-1.54417e-12	2	0	0
GO:0051126	negative regulation of actin nucleation	1	-1.54417e-12	2	0	0
GO:0000290	deadenylation-dependent decapping of nuclear-transcribed mRNA	1	-1.54417e-12	2	0	0
GO:0004385	guanylate kinase activity	1	-1.54417e-12	2	0	0
GO:0035494	SNARE complex disassembly	1	-1.54417e-12	2	0	0
GO:0048625	myoblast fate commitment	1	-1.54417e-12	2	0	0
GO:0032239	regulation of nucleobase-containing compound transport	1	-1.54417e-12	2	0	0
GO:0033120	positive regulation of RNA splicing	1	-1.54417e-12	2	0	0
GO:0010032	meiotic chromosome condensation	1	-1.54417e-12	2	0	0
GO:0043090	amino acid import	1	-1.54417e-12	2	0	0
GO:0097354	prenylation	1	-1.54417e-12	2	0	0
GO:0034063	stress granule assembly	1	-1.54417e-12	2	0	0
GO:0032049	cardiolipin biosynthetic process	1	-1.54417e-12	2	0	0
GO:0035542	regulation of SNARE complex assembly	1	-1.54417e-12	2	0	0
GO:0017128	phospholipid scramblase activity	1	-1.54417e-12	2	0	0
GO:0009166	nucleotide catabolic process	1	-1.54417e-12	2	0	0
GO:0045321	leukocyte activation	1	-1.54417e-12	2	0	0
GO:0001845	phagolysosome assembly	1	-1.54417e-12	2	0	0
GO:1902221	erythrose 4-phosphate/phosphoenolpyruvate family amino acid metabolic process	1	-1.54417e-12	2	0	0
GO:0015232	heme transporter activity	1	-1.54417e-12	2	0	0
GO:2001251	negative regulation of chromosome organization	1	-1.54417e-12	2	0	0
GO:0000959	mitochondrial RNA metabolic process	1	-1.54417e-12	2	0	0
GO:1901044	protein polyubiquitination involved in nucleus-associated proteasomal ubiquitin-dependent protein catabolic process	1	-1.54417e-12	2	0	0
GO:0043525	positive regulation of neuron apoptotic process	1	-1.54417e-12	2	0	0
GO:0001510	RNA methylation	1	-1.54417e-12	2	0	0
GO:0030808	regulation of nucleotide biosynthetic process	1	-1.54417e-12	2	0	0
GO:0051899	membrane depolarization	1	-1.54417e-12	2	0	0
GO:0045743	positive regulation of fibroblast growth factor receptor signaling pathway	1	-1.54417e-12	2	0	0
GO:0030295	protein kinase activator activity	1	-1.54417e-12	2	0	0
GO:0007307	eggshell chorion gene amplification	1	-1.54417e-12	2	0	0
GO:0097484	dendrite extension	1	-1.54417e-12	2	0	0
GO:0097194	execution phase of apoptosis	1	-1.54417e-12	2	0	0
GO:0010633	negative regulation of epithelial cell migration	1	-1.54417e-12	2	0	0
GO:1902373	negative regulation of mRNA catabolic process	1	-1.54417e-12	2	0	0
GO:0061575	cyclin-dependent protein serine/threonine kinase activator activity	1	-1.54417e-12	2	0	0
GO:0045198	establishment of epithelial cell apical/basal polarity	1	-1.54417e-12	2	0	0
GO:2000373	positive regulation of DNA topoisomerase (ATP-hydrolyzing) activity	1	-1.54417e-12	2	0	0
GO:0015746	citrate transport	1	-1.54417e-12	2	0	0
GO:0035225	determination of genital disc primordium	1	-1.54417e-12	2	0	0
GO:0007555	regulation of ecdysteroid secretion	1	-1.54417e-12	2	0	0
GO:0006336	DNA replication-independent nucleosome assembly	1	-1.54417e-12	2	0	0
GO:0010840	regulation of circadian sleep/wake cycle, wakefulness	1	-1.54417e-12	2	0	0
GO:0031630	regulation of synaptic vesicle fusion to presynaptic active zone membrane	1	-1.54417e-12	2	0	0
GO:0045838	positive regulation of membrane potential	1	-1.54417e-12	2	0	0
GO:0018196	peptidyl-asparagine modification	1	-1.54417e-12	2	0	0
GO:1904894	positive regulation of receptor signaling pathway via STAT	1	-1.54417e-12	2	0	0
GO:0032515	negative regulation of phosphoprotein phosphatase activity	1	-1.54417e-12	2	0	0
GO:0010085	polarity specification of proximal/distal axis	1	-1.54417e-12	2	0	0
GO:0060099	regulation of phagocytosis, engulfment	1	-1.54417e-12	2	0	0
GO:0009588	UV-A, blue light phototransduction	1	-1.54417e-12	2	0	0
GO:0071428	rRNA-containing ribonucleoprotein complex export from nucleus	1	-1.54417e-12	2	0	0
GO:0070574	cadmium ion transmembrane transport	1	-1.54417e-12	2	0	0
GO:0010133	proline catabolic process to glutamate	1	-1.54417e-12	2	0	0
GO:0021954	central nervous system neuron development	1	-1.54417e-12	2	0	0
GO:0099638	endosome to plasma membrane protein transport	1	-1.54417e-12	2	0	0
GO:0009126	purine nucleoside monophosphate metabolic process	1	4.27523e-14	8	0	0
GO:0051705	multi-organism behavior	1	4.27523e-14	8	0	0
GO:1903829	positive regulation of cellular protein localization	1	4.27523e-14	8	0	0
GO:0046434	organophosphate catabolic process	1	4.27523e-14	8	0	0
GO:0090101	negative regulation of transmembrane receptor protein serine/threonine kinase signaling pathway	1	4.27523e-14	8	0	0
GO:0045676	regulation of R7 cell differentiation	1	4.27523e-14	8	0	0
GO:0030516	regulation of axon extension	1	4.27523e-14	8	0	0
GO:0006405	RNA export from nucleus	1	4.27523e-14	8	0	0
GO:0043523	regulation of neuron apoptotic process	1	4.27523e-14	8	0	0
GO:0008362	chitin-based embryonic cuticle biosynthetic process	1	4.27523e-14	8	0	0
GO:0080171	lytic vacuole organization	1	4.27523e-14	8	0	0
GO:0072593	reactive oxygen species metabolic process	1	4.27523e-14	8	0	0
GO:0036466	synaptic vesicle recycling via endosome	1	4.27523e-14	8	0	0
GO:0008293	torso signaling pathway	1	4.27523e-14	8	0	0
GO:0035073	pupariation	1	4.27523e-14	8	0	0
GO:0035331	negative regulation of hippo signaling	1	4.27523e-14	8	0	0
GO:0048135	female germ-line cyst formation	1	4.27523e-14	8	0	0
GO:0043624	cellular protein complex disassembly	1	4.27523e-14	8	0	0
GO:0050909	sensory perception of taste	1	4.27523e-14	8	0	0
GO:0045047	protein targeting to ER	1	4.27523e-14	8	0	0
GO:0035296	regulation of tube diameter	1	4.27523e-14	8	0	0
GO:0002793	positive regulation of peptide secretion	1	4.27523e-14	8	0	0
GO:0061013	regulation of mRNA catabolic process	1	4.27523e-14	8	0	0
GO:0002807	positive regulation of antimicrobial peptide biosynthetic process	1	4.27523e-14	8	0	0
GO:0005980	glycogen catabolic process	1	4.27523e-14	8	0	0
GO:1903431	positive regulation of cell maturation	1	4.27523e-14	8	0	0
GO:0045792	negative regulation of cell size	1	4.27523e-14	8	0	0
GO:0060359	response to ammonium ion	1	4.27523e-14	8	0	0
GO:0032786	positive regulation of DNA-templated transcription, elongation	1	4.27523e-14	8	0	0
GO:0007040	lysosome organization	1	4.27523e-14	8	0	0
GO:0003712	transcription coregulator activity	1	4.27523e-14	8	0	0
GO:0008154	actin polymerization or depolymerization	1	4.27523e-14	8	0	0
GO:0010499	proteasomal ubiquitin-independent protein catabolic process	1	4.27523e-14	8	0	0
GO:0007426	tracheal outgrowth, open tracheal system	1	4.27523e-14	8	0	0
GO:0061057	peptidoglycan recognition protein signaling pathway	1	4.27523e-14	8	0	0
GO:0045196	establishment or maintenance of neuroblast polarity	1	4.27523e-14	8	0	0
GO:0034334	adherens junction maintenance	1	4.27523e-14	8	0	0
GO:0007041	lysosomal transport	1	4.27523e-14	8	0	0
GO:0006893	Golgi to plasma membrane transport	1	4.27523e-14	8	0	0
GO:0035215	genital disc development	1	4.27523e-14	8	0	0
GO:1905954	positive regulation of lipid localization	1	4.27523e-14	8	0	0
GO:0009112	nucleobase metabolic process	1	4.27523e-14	8	0	0
GO:0000912	assembly of actomyosin apparatus involved in cytokinesis	1	4.27523e-14	8	0	0
[truncated: 3,649 more rows]

## Sheet: 4c
4c. Background genelist utilized to perform gene-ontology enrichment analyses with data from Kuintzle et al., 2017 (GSE81100)
[truncated: 3,137 more rows]
