# Supplementary material for: Dietary restriction and clock delay eye aging to extend lifespan in D. melanogaster
Source: Research Square preprint supplement (doi:10.21203/rs.3.rs-428198/v1), 2021-05-21
Supplement: Supplementary file 6 [file eb1ad11628ec41a28349184e.xlsx]

## Sheet: 7a. nCLK-DN1
7a. Survival analyses of nCLK-𝚫1 flies.
Genotype:	Elav-GS-GAL4>UAS-CLK-𝚫1
		Median Lifespan in days (total # of flies)
	Repeat #	AL + vehicle	AL + RU486 (200µM)	DR + vehicle	DR + RU486 (200µM)
	1	29 (184)	22 (186)	68 (150)	39 (178)
	2	31 (193)	26 (197)	56 (186)	38 (195)
	3	36 (198)	24 (187)	68 (190)	44 (192)
		Median Lifespan in days (total # of flies)
		AL + vehicle	AL + RU486 (200µM)	DR + vehicle	DR + RU486 (200µM)
	N=3	32 (575)	24 (570)	64 (526)	40 (565)
		AL- vs DR-		AL+ vs DR+
	Log-rank (Mantel-cox) test , Chi-square and p-value	996.1, p<0.0001		483.7, p,0.0001
	Hazard Ratio (logrank) ratio and 95% confidence interval	0.22, 0.19 to 0.26		0.33, 0.29 to 0.37
		AL- vs AL+		DR- vs DR+
	Log-rank (Mantel-cox) test , Chi-square and p-value	103.0, p<0.0001		827.2, p<0.0001
	Hazard Ratio (logrank) ratio and 95% confidence interval	1.73, 1.54 to 1.95		4.00 , 3.46 to 4.62

## Sheet: 7b. nCLK-DN2
7b. Survival analyses of nCLK-𝚫2 flies.
Genotype:	Elav-GS-GAL4>UAS-CLK-𝚫2
		Median Lifespan in days (total # of flies)
	Repeat #	AL + vehicle	AL + RU486 (200µM)	DR + vehicle	DR + RU486 (200µM)
	1	52 (150)	30 (143)	81 (154)	34 (146)
	2	38 (173)	32 (169)	80 (168)	30 (167)
	3	39 (182)	33 (185)	80 (192)	27 (195)
		Median Lifespan in days (total # of flies)
		AL + vehicle	AL + RU486 (200µM)	DR + vehicle	DR + RU486 (200µM)
	N=3	44 (505)	31 (497)	80 (504)	30 (508)
		AL- vs DR-		AL+ vs DR+
	Log-rank (Mantel-cox) test , Chi-square and p-value	951.9, p<0.0001		14.3, p=0.0002
	Hazard Ratio (logrank) ratio and 95% confidence interval	0.22, 0.19 to 0.26		1.25, 1.1 to 1.41
		AL- vs AL+		DR- vs DR+
	Log-rank (Mantel-cox) test , Chi-square and p-value	210.3, p<0.0001		1123, p<0.001
	Hazard Ratio (logrank) ratio and 95% confidence interval	2.25, 1.97 to 2.58		4.98, 4.22 to 5.87

## Sheet: 7c. w1118
7c. Survival analyses of w1118 flies reared in 12:12 light-dark and constant darkness (DD).
Genotype:	w1118
		Median Lifespan in days (total # of flies)
	Repeat #	AL LD	AL DD	DR LD	DR DD
	1	26 (185)	32 (128)	44 (191)	44 (115)
	2	26 (192)	26 (135)	46 (197)	40 (166)
	3	24 (183)	26 (197)	42 (196)	44 (181)
		Median Lifespan in days (total # of flies)
		AL LD	AL DD	DR LD	DR DD
	N=3	26 (560)	27 (460)	42 (584)	42 (462)
		AL vs DR (LD)		AL vs DR (DD)
	Log-rank (Mantel-cox) test , Chi-square and p-value	610.5, p<0.0001		257.7, p<0.0001
	Hazard Ratio (logrank) ratio and 95% confidence interval	0.31, 0.27 to 0.15		0.40, 0.344 to 0.46
		AL: LD vs DD		DR: LD vs DD
	Log-rank (Mantel-cox) test , Chi-square and p-value	37.53, p<0.0001		1.36, p=0.24
	Hazard Ratio (logrank) ratio and 95% confidence interval	0.71, 0.63 to 0.81		1.07, 0.95 to 1.21

## Sheet: 7d. TrpP365
7d. Survival analyses of w1118;TRP^P365 flies reared in 12:12 light-dark and constant darkness (DD).
Genotype:	w1118;TRPP365
		Median Lifespan in days (total # of flies)
	Repeat #	AL LD	AL DD	DR LD	DR DD
	1	30 (111)	32 (149)	50 (185)	54 (172)
	2	36 (179)	34 (152)	52 (188)	48 (185)
		Median Lifespan in days (total # of flies)
		AL LD	AL DD	DR LD	DR DD
	N=2	34 (290)	32 (301)	52 (373)	50 (357)
		AL vs DR (LD)		AL vs DR (DD)
	Log-rank (Mantel-cox) test , Chi-square and p-value	167.7, p<0.0001		355.6, p<0.0001
	Hazard Ratio (logrank) ratio and 95% confidence interval	0.41, 0.34 to 0.49		0.29, 0.24 to 0.35
		AL: LD vs DD		DR: LD vs DD
	Log-rank (Mantel-cox) test , Chi-square and p-value	23.92, p<0.0001		0.49, p=0.483
	Hazard Ratio (logrank) ratio and 95% confidence interval	1.44, 1.23 to 1.70		1.04, 0.91 to 1.21

## Sheet: 7e. NinaE17
7e. Survival analyses of w1118;ninaE17 flies reared in 12:12 light-dark and constant darkness (DD).
Genotype:	w1118;ninaE17
		Median Lifespan in days (total # of flies)
	Repeat #	AL		DR
	1	32 (178)		42 (186)
	2	28 (172)		42 (187)
	3	32 (164)		40 (138)
		Median Lifespan in days (total # of flies)
		AL ninaE17		DR ninaE17
	N=3	30 (514)		42 (511)
		AL vs DR
	Log-rank (Mantel-cox) test , Chi-square and p-value	238.7, p<0.0001
	Hazard Ratio (logrank) ratio and 95% confidence interval	0.44, 0.38 to 0.50
		AL ninaE17 vs w1118		DR ninaE17 vs w1118
	Log-rank (Mantel-cox) test , Chi-square and p-value	105.0, p<0.0001		0.035, ns
	Hazard Ratio (logrank) ratio and 95% confidence interval	0.57, 0.51 to 0.66		1.011, 0.89 to 1.15

## Sheet: 7f. Rh3 null
7f. Survival analyses of w1118;rh3^2 flies reared in 12:12 light-dark and constant darkness (DD).
Genotype:	w1118;rh32
		Median Lifespan in days (total # of flies)
	Repeat #	AL LD	AL DD	DR LD	DR DD
	1	46 (179)	40 (100)	56 (215)	48 (137)
	2	38 (181)	30 (80)	48 (187)	38 (144)
	3	32 (183)	32 (145)	32 (195)	48 (190)
		Median Lifespan in days (total # of flies)
		AL LD Rh3	AL DD Rh3	DR LD Rh3	DR LD Rh3
	N=3	38 (543)	34 (325)	42 (597)	46 (471)
		AL vs DR (LD)		AL vs DR (DD)
	Log-rank (Mantel-cox) test , Chi-square and p-value	107.8, p<0.0001		163.4, p<0.0001
	Hazard Ratio (logrank) ratio and 95% confidence interval	0.58, 0.51 to 0.66		0.44, 0.38 to 0.52
		AL Rh3 vs w1118 (LD)		DR Rh3 vs w1118 (LD)
	Log-rank (Mantel-cox) test , Chi-square and p-value	415.4, p<0.0001		12.64, p<0.0004
	Hazard Ratio (logrank) ratio and 95% confidence interval	0.36, 0.32 to 0.41		0.83, 0.74 to 0.93
		AL Rh3 vs w1118 (DD)		DR Rh3 vs w1118 (DD)
	Log-rank (Mantel-cox) test , Chi-square and p-value	4.108, p=0.04		11.7, p=0.0006
	Hazard Ratio (logrank) ratio and 95% confidence interval	1.14, 0.99 to 1.31		1.21, 1.07 to 1.38
		AL LD vs DD		DR LD vs DD
	Log-rank (Mantel-cox) test , Chi-square and p-value	9.31, p=0.002		0.58, p=0.448
	Hazard Ratio (logrank) ratio and 95% confidence interval	1.21, 1.06 to 1.40		0.96, 0.85 to 1.08

## Sheet: 7g. Rh4 null
7g. Survival analyses of w1118;rh4^1 flies reared in 12:12 light-dark and constant darkness (DD).
Genotype:	rh41, w1118
		Median Lifespan in days (total # of flies)
	Repeat #	AL LD	AL DD	DR LD	DR DD
	1	27 (190)	30 (151)	64 (212)	64 (169)
	2	28 (174)	26 (142)	56 (188)	54 (143)
	3	26 (186)	34 (190)	56 (193)	67 (194)
		Median Lifespan in days (total # of flies)
		AL LD Rh4	AL DD Rh4	DR LD Rh4	DR DD Rh4
	N=3	26 (550)	30 (483)	60 (584)	62 (506)
		AL vs DR (LD)		AL vs DR (DD)
	Log-rank (Mantel-cox) test , Chi-square and p-value	926.8, p<0.0001		801.2, p<0.0001
	Hazard Ratio (logrank) ratio and 95% confidence interval	0.24, 0.21 to 0.28		0.24, 0.21 to 0.29
		AL Rh4 vs w1118 (LD)		DR Rh4 vs w1118 (LD)
	Log-rank (Mantel-cox) test , Chi-square and p-value	25.17, p<0.0001		231.4, p<0.0001
	Hazard Ratio (logrank) ratio and 95% confidence interval	0.77, 0.68 to 0.86		0.45, 0.40 to 0.51
		AL Rh4 vs w1118 (DD)		DR Rh4 vs w1118 (DD)
	Log-rank (Mantel-cox) test , Chi-square and p-value	132.1, p<0.0001		116.9, p<0.0001
	Hazard Ratio (logrank) ratio and 95% confidence interval	1.88, 1.65 to 2.15		0.56, 0.49 to 0.63
		AL LD vs DD		DR LD vs DD
	Log-rank (Mantel-cox) test , Chi-square and p-value	22.57, p<0.0001		15.01, p=0.0001
	Hazard Ratio (logrank) ratio and 95% confidence interval	0.76, 0.68 to 0.87		0.81, 0.72 to 0.91

## Sheet: 7h. Rh6 null
7h. Survival analyses of w1118;rh6^G flies reared in 12:12 light-dark and constant darkness (DD).
Genotype:	w1118;rh6G
		Median Lifespan in days (total # of flies)
	Repeat #	AL LD	AL DD	DR LD	DR DD
	1	45 (184)	26 (108)	58 (187)	48 (109)
	2	38 (184)	26 (96)	48 (199)	43 (106)
	3	34 (165)	42 (131)	50 (177)	62 (150)
		Median Lifespan in days (total # of flies)
		AL LD Rh6	AL DD Rh6	DR LD Rh6	DR DD Rh6
	N=3	38 (533)	30 (335)	50 (563)	52 (365)
		AL vs DR (LD)		AL vs DR (DD)
	Log-rank (Mantel-cox) test , Chi-square and p-value	86.1, p<0.0001		177.7, p<0.0001
	Hazard Ratio (logrank) ratio and 95% confidence interval	0.59, 0.53 to 0.68		0.41, 0.35 to 0.49
		AL Rh6 vs w1118 (LD)		DR Rh6 vs w1118 (LD)
	Log-rank (Mantel-cox) test , Chi-square and p-value	383.7, p<0.0001		47.0, p<0.0001
	Hazard Ratio (logrank) ratio and 95% confidence interval	0.38, 0.33 to 0.43		0.688, 0.62 to 0.77
		AL Rh6 vs w1118 (DD)		DR Rh6 vs w1118 (DD)
	Log-rank (Mantel-cox) test , Chi-square and p-value	0.62, p=0.43		15.1, p=0.0001
	Hazard Ratio (logrank) ratio and 95% confidence interval	1.05, 0.92 to 1.20		0.80, 0.70 to 0.91
		AL LD vs DD		DR LD vs DD
	Log-rank (Mantel-cox) test , Chi-square and p-value	32.6, p<0.0001		10.62, p=0.0011
	Hazard Ratio (logrank) ratio and 95% confidence interval	1.45, 1.26 to 1.68		0.82, 0.72 to 0.93

## Sheet: 7i. Gq1
7i. Survival analyses of w1118;Gqa1 flies reared in 12:12 light-dark and constant darkness (DD).
Genotype:	w1118;Gqa1
		Median Lifespan in days (total # of flies)
	Repeat #	AL LD	AL DD	DR LD	DR DD
	1	32 (182)	42 (93)	42 (138)	60 (121)
	2	36 (62)	42 (93)	50 (127)	58 (99)
	3	36 (159)	32 (150)	68 (135)	62 (205)
		Median Lifespan in days (total # of flies)
		AL LD Gq1	AL DD Gq1	DR LD Gq1	DR DD Gq1
	N=3	32 (403)	36 (356)	51 (400)	62 (425)
		AL vs DR (LD)		AL vs DR (DD)
	Log-rank (Mantel-cox) test , Chi-square and p-value	335.5, p<0.0001		455.9, p<0.0001
	Hazard Ratio (logrank) ratio and 95% confidence interval	0.34, 0.29 to 0.40		0.28, 0.23 to 0.33
		AL LD: Gq1 vs w1118		DR LD: Gq1 to w1118
	Log-rank (Mantel-cox) test , Chi-square and p-value	200.6, p<0.0001		54.25, p<0.0001
	Hazard Ratio (logrank) ratio and 95% confidence interval	0.46, 0.40 to 0.52		0.65, 0.57 to 0.74
		AL DD: Gq1 vs w1118		DR DD: Gq1 vs w1118
	Log-rank (Mantel-cox) test , Chi-square and p-value	100.7, p<0.0001		258.3, p<0.0001
	Hazard Ratio (logrank) ratio and 95% confidence interval	0.53, 0.46 to 0.61		0.39, 0.34 to 0.45
		AL LD vs DD		DR LD vs DD
	Log-rank (Mantel-cox) test , Chi-square and p-value	32.0, p<0.0001		56.27, p<0.0001
	Hazard Ratio (logrank) ratio and 95% confidence interval	0.69, 0.60 to 0.80		0.63, 0.55 to 0.73

## Sheet: 7j. GMR-RNAi cnt
7j. Survival analyses of eye-specific RNAi control flies.
Genotype	GMR-GAL4>UAS-mCherry-RNAi (BDSC RNAi control)
		Median Lifespan in days (total # of flies)
	Repeat #	AL		DR
	1	48 (137)		58 (118)
	2	43 (175)		67 (175)
	3	48 (181)		68 (197)
		Median Lifespan in days (total # of flies)
		AL		DR
	N=3	46 (493)		66 (490)
		AL vs DR
	Log-rank (Mantel-cox) test , Chi-square and p-value	315.5, p<0.0001
	Hazard Ratio (logrank) ratio and 95% confidence interval	0.38, 0.33 to 0.44

[truncated: 12 more sheets: 7k. GMR-retinin-RNAi, 7l. GMR-sunglasses-RNAi, 7m. GMR-GBeta76c-RNAi, 7n. GMR-ATPa-RNAi, 7o. GMR-nrv2-RNAi, 7p. GMR-Nrv3-RNAi, 7q. GMR-Arr1-RNAi, 7r. GMR-VDRC-RNAi cnt, 7s. Trpl-CsChrimson, 7t. CantonS, 7u. CantonS_Retinal, 7v. prCLK-DN1]
